# Supplementary material for: Reactivity–Stereoselectivity Mapping for the Assembly of Mycobacterium marinum Lipooligosaccharides
Source: PubMed Central journal article supplement (PMC7821131; doi:10.1002/anie.202010280), 2020-11-03

## Supporting Information

### **Reactivity–Stereoselectivity Mapping for the Assembly of *Mycobacterium marinum* Lipooligosaccharides**

*Thomas Hansen<sup>+</sup>, Tim P. Ofman<sup>+</sup>, Joey G. C. Vlaming<sup>+</sup>, Ivan A. Gagarinov, Jessey van Beek,  
Tessa A. Goté, Jacoba M. Tichem, Gijs Ruijgrok, Herman S. Overkleeft, Dmitri V. Filippov,  
Gijsbert A. van der Marel, and Jeroen D. C. Codée\**

anie\_202010280\_sm\_miscellaneous\_information.pdf

## **Author Contributions**

T.H., G.A.M., J.D.C.C. designed the experiments. T.H., T.P.O., J.G.C.V., I.A.G., J.B., T.A.G., J.M.T., G.R., carried out the experimental work. T.H. performed all computational work. T.H., T.P.O., J.G.C.V., I.A.G., J.B., T.A.G., J.M.T., G.R., H.S.O., D.V.F., G.A.M., J.D.C.C. were involved in scientific discussions and critically reviewed the manuscript.

## Supplementary information

|                                                                                                            |     |
|------------------------------------------------------------------------------------------------------------|-----|
| <b>Reactivity-selectivity mapping of 4-azidofucose donor 3</b>                                             | S3  |
| <b>Additives controlled model glycosylation reactions</b>                                                  | S4  |
| <b>DFT calculations</b>                                                                                    | S5  |
| General procedure I: CEL calculations of pyranosyl oxocarbenium ions                                       | S5  |
| <b>Variable-temperature NMR</b>                                                                            | S6  |
| General procedure II: pre-activation Tf <sub>2</sub> O/Ph <sub>2</sub> SO based variable-temperature NMR   | S6  |
| Results of compound 25                                                                                     | S7  |
| Results of compound 24                                                                                     | S7  |
| Results of compound 3                                                                                      | S8  |
| Results of compound 23                                                                                     | S9  |
| Results of compound 4                                                                                      | S9  |
| <b>Organic synthesis</b>                                                                                   | S11 |
| General experimental procedures                                                                            | S11 |
| General procedure III: pre-activation Tf <sub>2</sub> O/Ph <sub>2</sub> SO based glycosylation             | S11 |
| General procedure IV: DMF assisted pre-activation Tf <sub>2</sub> O/Ph <sub>2</sub> SO based glycosylation | S12 |
| General procedure V: TBAI assisted pre-activation Tf <sub>2</sub> O/Ph <sub>2</sub> SO based glycosylation | S12 |
| General procedure VI: TMSOTf activation based glycosylation of imidates                                    | S12 |
| Preparation of the building blocks                                                                         | S12 |
| Synthesis of compound 4                                                                                    | S12 |
| Synthesis of compound 3                                                                                    | S23 |
| Synthesis of compound 2                                                                                    | S26 |
| Synthesis of compound 23                                                                                   | S32 |
| Synthesis of compound 24 and S36                                                                           | S37 |
| Synthesis of compound 25                                                                                   | S44 |
| Preparation of the target compounds                                                                        | S47 |
| Synthesis of compound 1                                                                                    | S47 |
| Synthesis of compound 36 and S44                                                                           | S53 |
| Synthesis of compound 37                                                                                   | S56 |

|                                           |     |
|-------------------------------------------|-----|
| Preparation of model acceptors            | S57 |
| Synthesis of acceptor <b>28</b>           | S57 |
| Synthesis of acceptor <b>29</b>           | S59 |
| Model glycosylation reactions             | S60 |
| Results of compound <b>4</b>              | S60 |
| Results of compound <b>23</b>             | S65 |
| Results of compound <b>24</b>             | S69 |
| Results of compound <b>S36</b>            | S69 |
| Results of compound <b>25</b>             | S72 |
| Results of compound <b>3</b>              | S72 |
| Structural proofs                         | S76 |
| NMR spectra of new and selected compounds | S84 |

## Reactivity-selectivity mapping of 4-azidofucose donor 3

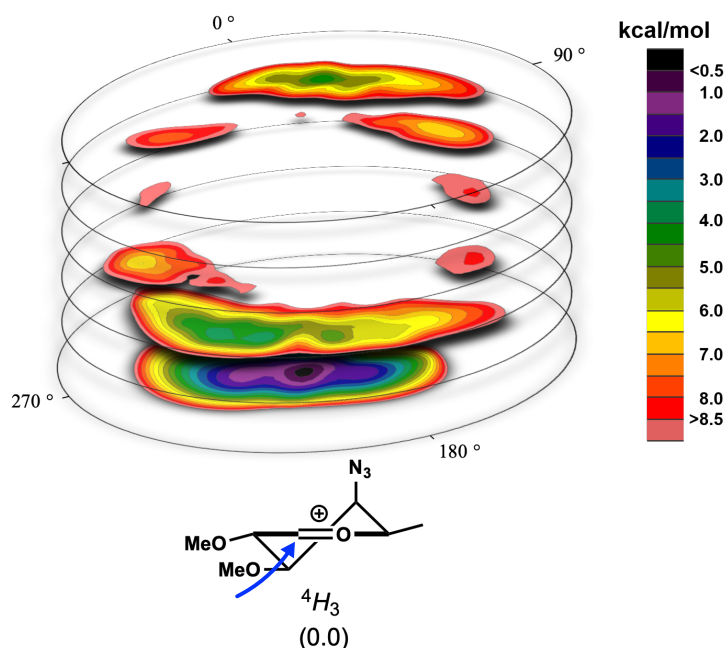

**Figure S1.** Conformational energy landscape (CEL) maps of 4-azidofucose pyranosyl oxocarbenium ions in which the found local minima are indicated with their respective energy. All energies are as computed at PCM(CH<sub>2</sub>Cl<sub>2</sub>)-B3LYP/6-311G(d,p) at  $T = 213.15$  K and expressed as solution-phase Gibbs free energy.

**Table S1.** Experimentally found stereoselectivities for model glycosylation reactions with ethanol, 2-fluoroethanol, 2,2-difluoroethanol, 2,2,2-trifluoroethanol, 1,1,1,3,3,3-hexafluoro-2-propanol, triethylsilane-*d*, 1-buten-4-ol, **28** and **29**. The stereoselectivity of the reaction is expressed as  $\alpha$ : $\beta$  and based on the <sup>1</sup>H-NMR spectroscopy. Results of the glycosylation study. Experimental conditions: pre-activation based glycosylation conditions; Ph<sub>2</sub>SO (1.3 eq.), TTBP (2.5 eq.), DCM (0.05 M), then Tf<sub>2</sub>O (1.3 eq.), then nucleophile (2 eq.), -80 °C to -60 °C.

| Nucleophile                                                                         | α:β (Yield %) | Nucleophile                                                                           | α:β (Yield %) |
|-------------------------------------------------------------------------------------|---------------|---------------------------------------------------------------------------------------|---------------|
| 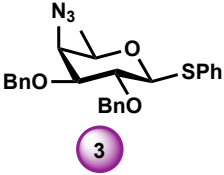 |               |  |               |
|  | 36:64 (87%)   |   | 39:61 (85%)   |
|  | 48:52 (100%)  |   | 58:42 (76%)   |
|  | 77:23 (91%)   |   | >98:2 (66%)   |
|  | >98:2 (70%)   |                                                                                       |               |
|  | >98:2 (69%)   |                                                                                       |               |
|  | >98:2 (82%)   |                                                                                       |               |

>90:10 >80:20 >60:40 >50:50 <50:50 <40:60 <20:80 <10:90 (1,2-*cis*:1,2-*trans*)

## Additives controlled model glycosylation reactions

**Table S2.** Experimentally found stereoselectivities for model glycosylation reactions with additives including DMF (16 eq) and TBAI (8 eq). The stereoselectivity of the reaction is expressed as  $\alpha:\beta$  and based on the  $^1\text{H-NMR}$  spectroscopy. Experimental conditions: pre-activation based glycosylation conditions;  $\text{Ph}_2\text{SO}$  (1.3 eq.), TTBP (2.5 eq.), DCM (0.05 M), then  $\text{Tf}_2\text{O}$  (1.3 eq.), then nucleophile (2 eq.),  $-80\text{ }^\circ\text{C}$  to  $-60\text{ }^\circ\text{C}$ .

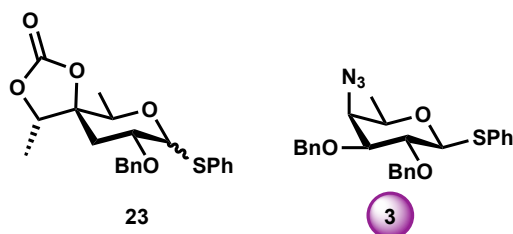

| Entry | donor     |                     |                 |                 |                |                |
|-------|-----------|---------------------|-----------------|-----------------|----------------|----------------|
| 1     | <b>23</b> | >98:2<br>(77%)      | 80:20<br>(100%) | 66:34<br>(76%)  | 50:50<br>(60%) | 60:40<br>(86%) |
| 2     | +DMF      | >98:2<br>(36%)      | 88:12<br>(100%) | 81:19<br>(85%)  | 63:37<br>(72%) | 67:33<br>(55%) |
| 3     | +TBAI     | donor<br>hydrolysis | >98:2<br>(16%)  | >98:2<br>(65%)  | >98:2<br>(62%) | >98:2<br>(61%) |
| 4     | <b>3</b>  | >98:2<br>(70%)      | 77:23<br>(91%)  | 48:52<br>(100%) | 36:64<br>(87%) | 39:61<br>(85%) |
| 5     | +DMF      | >98:2<br>(73%)      | >98:2<br>(85%)  | 81:19<br>(100%) | 62:38<br>(93%) | 63:37<br>(61%) |
| 6     | +TBAI     | donor<br>hydrolysis | >98:2<br>(81%)  | >98:2<br>(79%)  | >98:2<br>(75%) | >98:2<br>(95%) |

>90:10
>80:20
>60:40
>50:50
<50:50
<40:60
<20:80
<10:90
 (1,2-*cis*:1,2-*trans*)

## Model glycosylation reaction with imidate donor

**Table S3.** Experimentally found stereoselectivities for model glycosylation reactions. The stereoselectivity of the reaction is expressed as  $\alpha:\beta$  and based on the  $^1\text{H-NMR}$  spectroscopy. Experimental conditions: acceptor (2.0 eq.), DCM (0.05 M), then TMSOTf (0.5 M solution in DCM) (2 eq.),  $-80\text{ }^\circ\text{C}$  to  $-10\text{ }^\circ\text{C}$ .

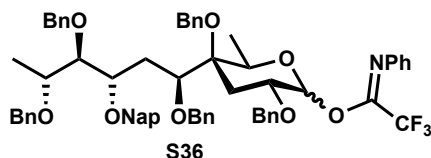

| Entry | donor |                  |                  |                |                |                |                 |
|-------|-------|------------------|------------------|----------------|----------------|----------------|-----------------|
| 1     | 25    | by-product<br>26 | by-product<br>26 | >98:2<br>(68%) | 63:37<br>(86%) | 33:67<br>(70%) | 25:75<br>(100%) |

## DFT calculations

### General procedure I: conformational energy landscape calculation of pyranosyl oxocarbenium ions

To keep the calculation time manageable, large protection groups (OBn) were substituted with electronically comparable smaller groups (OMe). The initial structure for the conformational energy landscape (CEL) was optimized by starting from a 'conformer distribution search' option included in the Spartan 10 program by utilizing DFT as the level of theory and the hybrid functional B3LYP in gas phase with 6-31G(d) as the basis set. All generated gas-phase geometries were re-optimized with Gaussian 09 rev D.01 by using B3LYP/6-311G(d,p), after which a vibrational analysis was computed to obtain the thermodynamic properties. The gas-phase structures were then solvated by using the PCM implicit solvation model, with  $\text{CH}_2\text{Cl}_2$  as solvent. Solvent effects were explicitly used in the solving of the SCF equations and during the optimization of the geometry. The geometry with the lowest solvated energy was selected as the starting point for the CEL map. A complete survey of the possible conformational space was done by scanning three dihedral angles ranging from  $-60^\circ$  to  $60^\circ$ , including the C1-C2-C3-C4 (D1), C3-C4-C5-O (D3) and C5-O-C1-C2 (D5). The resolution of this survey is determined by the step size which was set to  $15^\circ$  per puckering parameter, giving a total of 729 pre-fixed conformations per six-membered oxocarbenium ion spanning the entire conformational landscape. All other internal coordinates were unconstrained. With the exception of a C2-substituent being present on the oxocarbenium ring of interest, then the C2-H2 bond length was fixed based on the optimized structure to counteract rearrangements occurring for higher energy conformers. The 729 structures were computed with Gaussian 09 rev D.01 again with a two-step procedure. First, the structures were optimized in the gas-phase with B3LYP/6-311G(d,p), after which a vibrational analysis was computed to obtain the thermodynamic properties. The gas-phase structures were then solvated by using the PCM implicit solvation model, with  $\text{CH}_2\text{Cl}_2$  as solvent. Solvent effects were explicitly used in the solving of the SCF equations and during the optimization of the geometry. The final denoted free Gibbs energy was calculated using Equation (S1) in which  $\Delta E_{\text{gas}}$  is the gas-phase energy (electronic energy),  $\Delta G_{\text{gas,QH}}^T$  ( $T$  = reaction temperature and  $p = 1\text{ atm.}$ ) is the sum of corrections from the electronic energy to free Gibbs energy in the quasi-harmonic oscillator approximation also including zero-point energy (ZPE), and  $\Delta G_{\text{solv}}$  is their corresponding free solvation Gibbs energy. The  $\Delta G_{\text{gas,QH}}^T$  were computed using the quasi-harmonic approximation in the gas phase according to the work of Truhlar.

$$\begin{aligned}\Delta G_{\text{CH}_2\text{Cl}_2}^T &= \Delta E_{\text{gas}} + \Delta G_{\text{gas,QH}}^T + \Delta G_{\text{solv}} \\ &= \Delta G_{\text{gas}}^T + \Delta G_{\text{solv}}\end{aligned}\quad (\text{Eq. S1})$$

The quasi-harmonic approximation is the same as the harmonic oscillator approximation except that vibrational frequencies lower than 100 cm<sup>-1</sup> were raised to 100 cm<sup>-1</sup> as a way to correct for the breakdown of the harmonic oscillator model for the free energies of low-frequency vibrational modes. All found minima were checked for imaginary frequencies. To visualize the energy levels of the conformers on the Cremer-Pople sphere, slices were generated dissecting the sphere that combine closely associated conformers (Figure S1). The OriginPro software was employed to produce the energy heat maps, contoured at 0.5 kcal/mol. For ease of visualization, the Cremer-Pople globe is turned 180° with respect to its common representation and both poles (the <sup>4</sup>C<sub>1</sub> and <sup>1</sup>C<sub>4</sub> structures) are omitted as these conformations are very high in energy. Visualization of conformations of interest was done with CYLview.

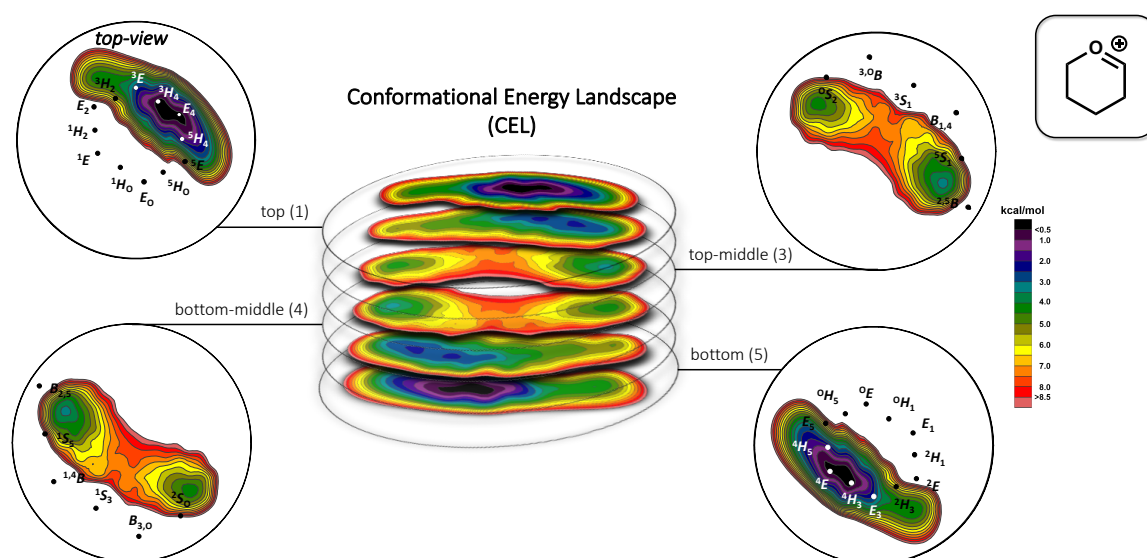

**Figure S2.** “Deconvolution” of the CEL map showing a top view of the most important slices that have been combined to generate the full CEL map.

## Variable-temperature NMR

### General procedure II: pre-activation Tf<sub>2</sub>O/Ph<sub>2</sub>SO based variable-temperature NMR

A mixture of the donor (30 μmol, 1 eq.), Ph<sub>2</sub>SO (8.0 mg, 39 μmol, 1.3 eq.) and TTBP (19 mg, 75 μmol, 2.5 eq.) were co-evaporated with toluene (3x). Under a nitrogen atmosphere, CD<sub>2</sub>Cl<sub>2</sub> was added after which the mixture was transferred to a nitrogen flushed NMR tube that was then closed with an NMR septum. The NMR magnet was cooled to -80 °C, locked and shimmed prior to activation. The sample was cooled in an ethanol bath of -80 °C, upon which Tf<sub>2</sub>O (6.6 μL, 39 μmol, 1.3 eq.) was added, the tube was shaken three times, wiped clean and rapidly inserted back in the NMR magnet. The sample was then re-shimmed and spectra were recorded with 10 °C intervals, securing the temperature to be stable. At -60 °C full characterization of the reactive species was performed by taking <sup>13</sup>C, HH-COSY, HSQC, and <sup>19</sup>F NMR. <sup>1</sup>H spectra were recorded with increasing temperature until degradation was observed.



### Results of compound 25

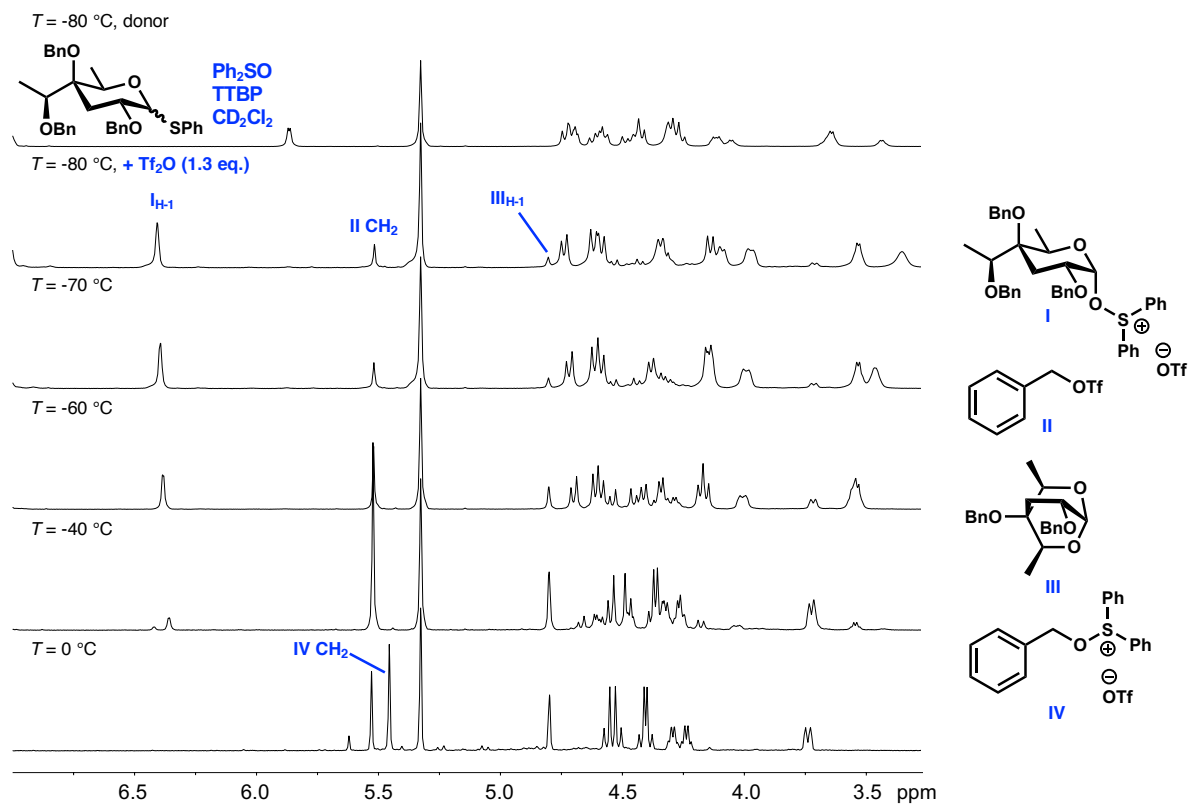

Figure S3. Variable-T NMR of donor 25 under pre-activation conditions.

### Results of compound 24

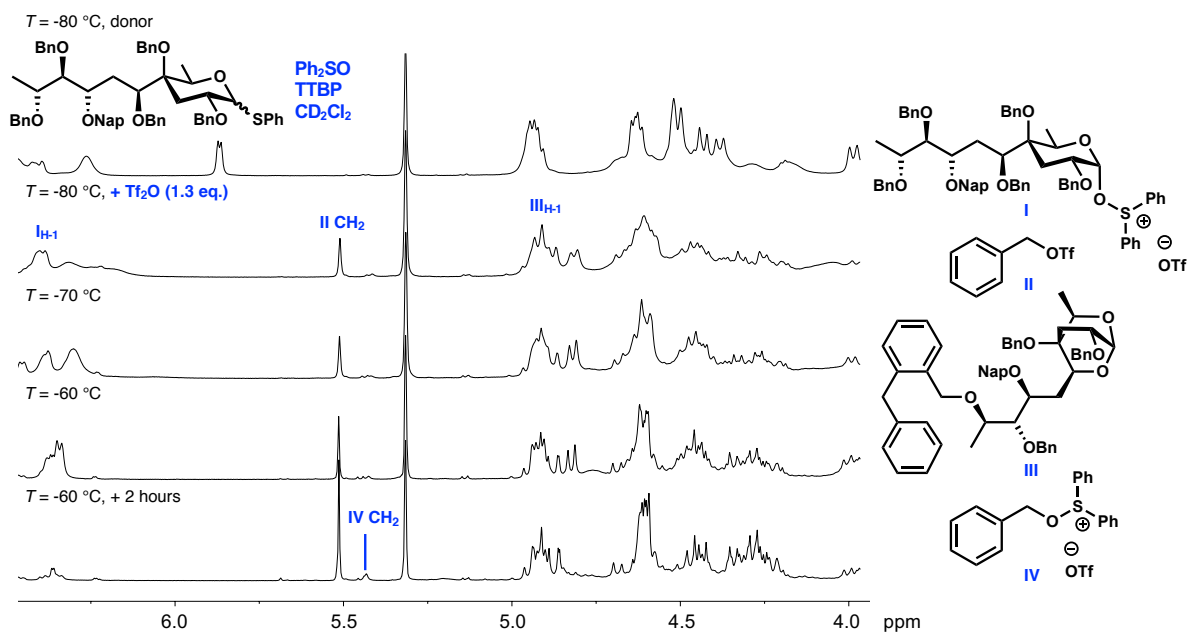

Figure S4. Variable-T NMR of donor 24 under pre-activation conditions.

### Results of compound 3

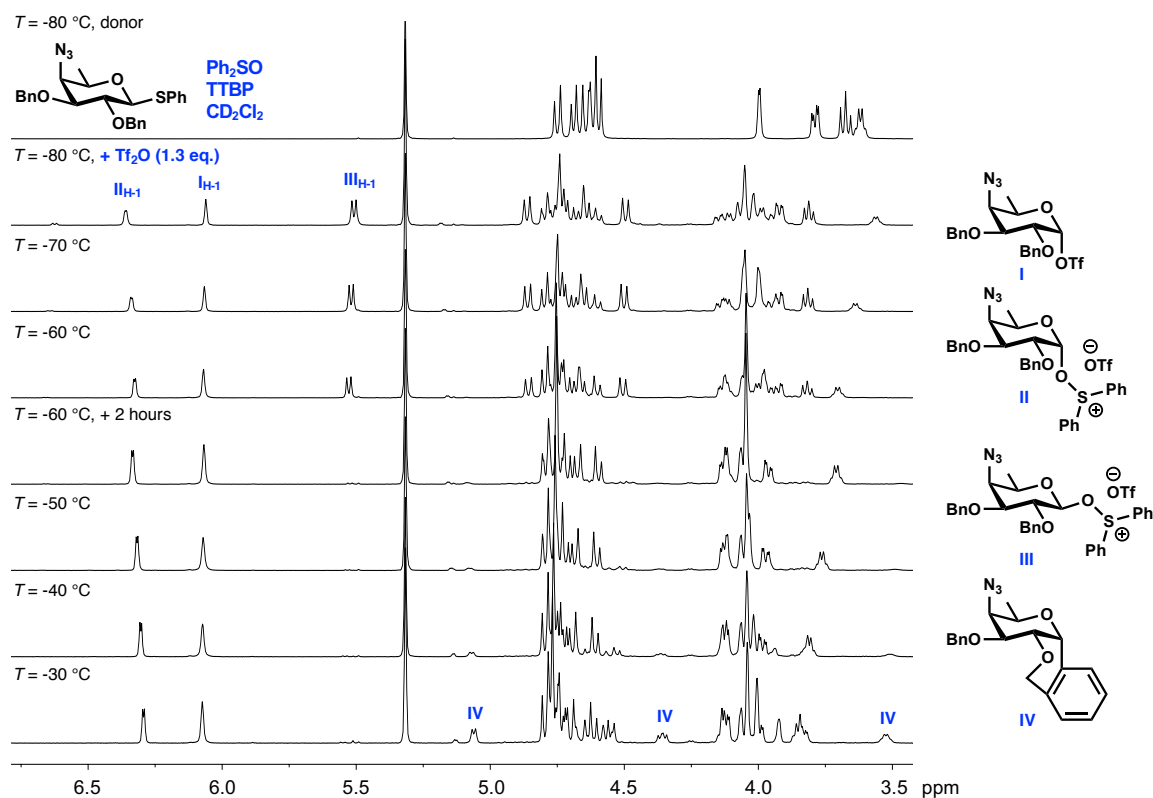

Figure S5. Variable-T NMR of donor 3 under pre-activation conditions.

### Results of compound 3 (+DMF)

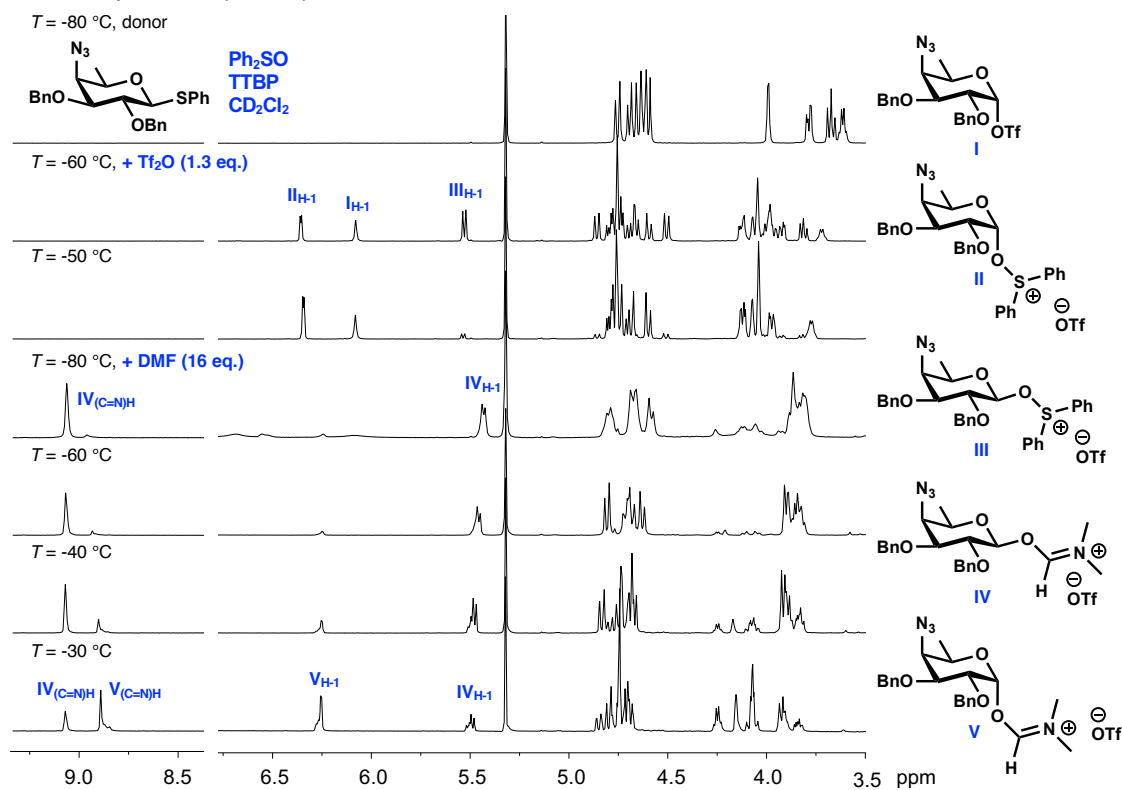

Figure S6. Variable-T NMR of donor 3 under pre-activation conditions with DMF as additive.

## Results of compound 23

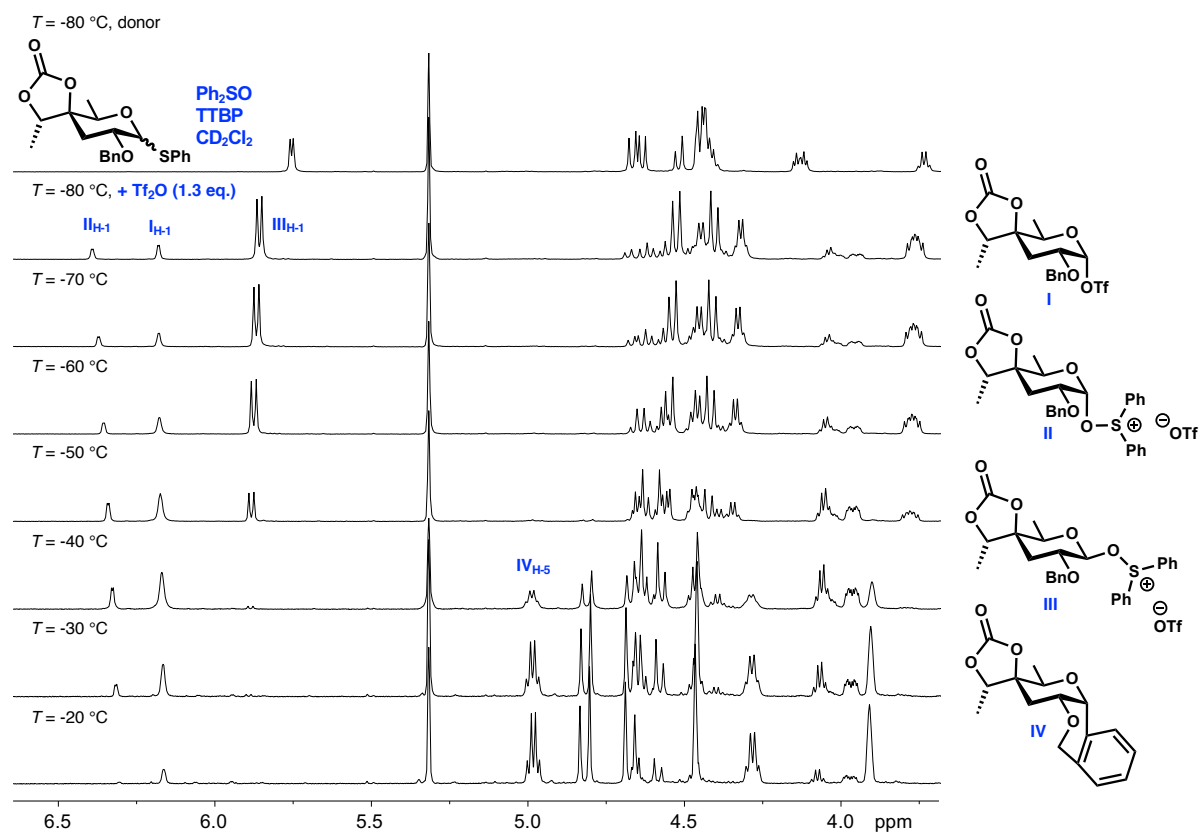

Figure S7. Variable-T NMR of donor 23 under pre-activation conditions.

## Results of compound 23 (+extra $\text{Ph}_2\text{SO}$ )

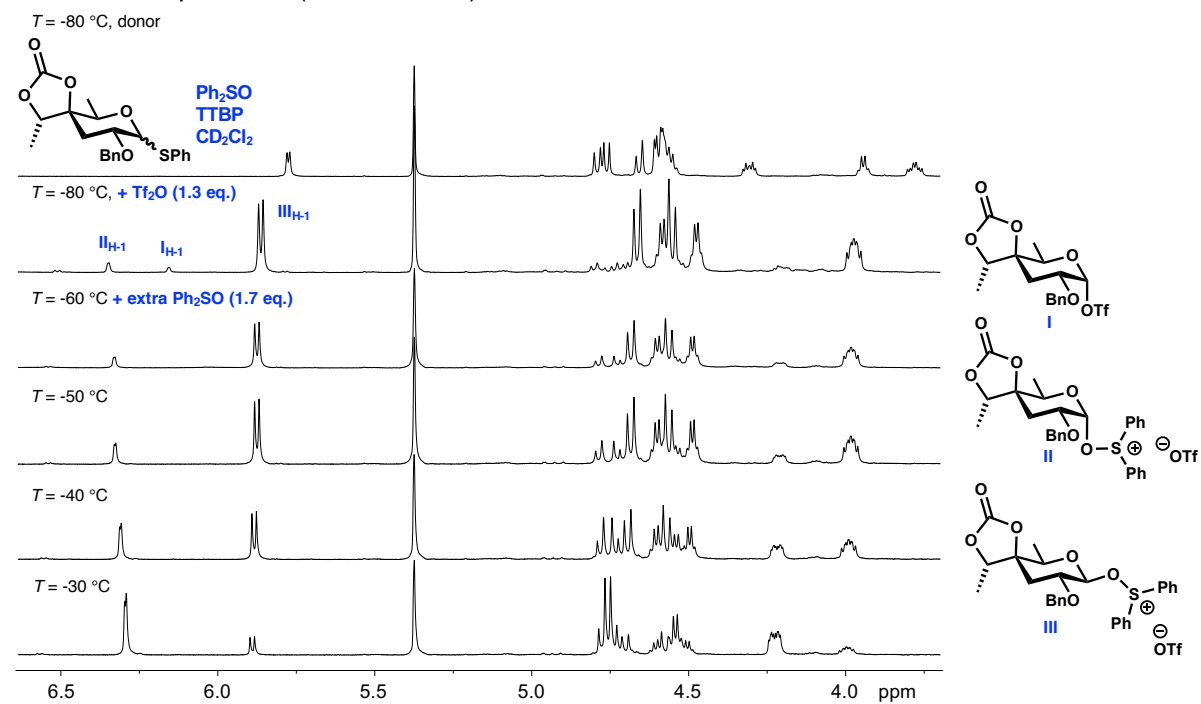

Figure S8. Variable-T NMR of donor 23 under pre-activation conditions with extra  $\text{Ph}_2\text{SO}$ .

## Results of compound 4

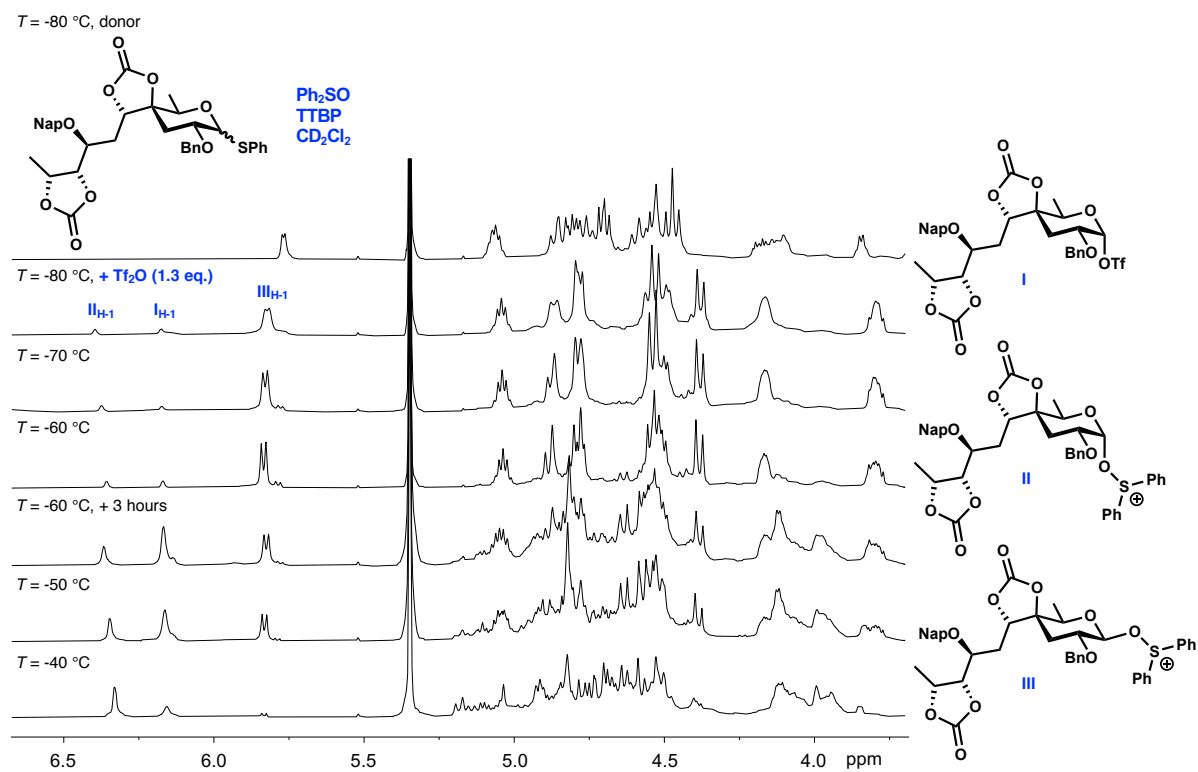

**Figure S9.** Variable-T NMR of donor 4 under pre-activation conditions.

## Organic synthesis

### General experimental procedures

All chemicals (Merck, Sigma-Aldrich, Alfa Aesar, Honeywell, Boom and Merck KGaA) were of commercial grade and were used as received unless stated otherwise. Dichloromethane, tetrahydrofuran and toluene were stored over activated 4 Å molecular sieves (beads, 8-12 mesh, Sigma-Aldrich). Before use traces of water present in the donor, diphenyl sulfoxide (Ph<sub>2</sub>SO) and tri-*tert*-butylpyrimidine (TTBP) were removed by co-evaporation with dry toluene. The acceptors used in the model glycosylation reactions (ethanol, 2-fluoroethanol, 2,2-difluoroethanol and 2,2,2-trifluoroethanol, 1,1,1,3,3,3-hexafluoro-2-propanol, triethylsilane-*d* and 3-buten-1-ol) were stored in stock solutions (DCM, 0.5 M) over activated 3 Å molecular rods (rods, size 1/16 in., Sigma Aldrich). Trifluoromethanesulfonic anhydride (Tf<sub>2</sub>O) was distilled over P<sub>2</sub>O<sub>5</sub> and stored at -20 °C under a nitrogen atmosphere. Deuterated chloroform was stored over activated 3 Å molecular rods (rods, size 1/16 in., Sigma Aldrich) and potassium carbonate. Flash column chromatography was performed on silica gel 60 Å (0.04 – 0.063 mm, Screening Devices B.V.). Size exclusion chromatography was performed on Sephadex<sup>TM</sup> (LH-20, GE Healthcare Life Sciences) by isocratic elution with DCM:MeOH (1:1, v:v). TLC-analysis was performed on TLC Silica gel 60 (Kieselgel 60 F254, Merck) with UV detection (254 nm) and by spraying with 20% H<sub>2</sub>SO<sub>4</sub> in ethanol followed by charring at ±260 °C or by spraying with a solution of (NH<sub>4</sub>)<sub>6</sub>Mo<sub>7</sub>O<sub>24</sub>·H<sub>2</sub>O (25 g/L) and (NH<sub>4</sub>)<sub>4</sub>Ce(SO<sub>4</sub>)<sub>4</sub>·2H<sub>2</sub>O (10 g/L) in 10% sulfuric acid in water followed by charring at ± 260 °C. TLC-MS analysis was performed on a Camag TLC-MS Interface coupled with an API165 (SCIEX) mass spectrometer (eluted with *tert*-butylmethylether/EtOAc/MeOH, 5/4/1, v/v/v +0.1% formic acid, flow rate 0.12 mL/min). High-resolution mass spectra (HRMS) were recorded on a Waters Synapt G2-Si (TOF) equipped with an electrospray ion source in positive mode (source voltage 3.5 kV) and an internal lock mass LeuEnk (M+H<sup>+</sup> = 556.2771). Amberlite resin (Sigma Aldrich Amberlite IR120 H<sup>+</sup> form, Amberlite IRA-67 free base) was pre-washed with MeOH. <sup>1</sup>H and <sup>13</sup>C NMR spectra were recorded on a Bruker AV-400 NMR instrument (400 and 101 MHz respectively), a Bruker AV-500 NMR instrument (500 and 126 MHz respectively), a Bruker AV-600 NMR instrument (600 and 151 MHz respectively) or a Bruker AV-850 NMR instrument (850 and 214 MHz respectively). All samples were measured in CDCl<sub>3</sub>, unless stated otherwise. Chemical shifts (δ) are given in ppm relative to tetramethylsilane as internal standard or the residual signal of the deuterated solvent. Coupling constants (*J*) are given in Hz. All given <sup>13</sup>C APT spectra are proton decoupled. NMR peak assignment was accomplished using COSY, HSQC. If necessary, additional NOESY, HMBC, and HMBC-gated experiments were used to further elucidate the structure. Stereochemical product ratios were based on integration of <sup>1</sup>H NMR (crude and purified). IR spectra were recorded on a Shimadzu FTIR-8300 IR spectrometer and are reported in cm<sup>-1</sup>. Specific rotations were measured on an Anton Paar Polarimeter MCP 100 in CHCl<sub>3</sub> (10 mg/mL) at 589 nm, unless stated otherwise.

### General procedure III: pre-activation Tf<sub>2</sub>O/Ph<sub>2</sub>SO based glycosylation

To a solution of the donor (50 μmol, 1 eq.) in DCM (1 mL, 0.05 M), Ph<sub>2</sub>SO (13 mg, 65 μmol, 1.3 eq.) and TTBP (31 mg, 125 μmol, 2.5 eq.) were added. The solution was stirred over activated 3 Å molecular sieves (rods, size 1/16 in., Sigma Aldrich) for 30 min. The solution was cooled to -80 °C upon which Tf<sub>2</sub>O (11 μL, 65 μmol, 1.3 eq.) was added slowly (5 seconds). Subsequently, the solution was allowed to attain to -60 °C to secure full activation of the donor followed by cooling back to -80 °C after which the acceptor was added (0.2 mL, 0.5 M solution, 2.0 eq.). The reaction was stirred for 16 h at -60 °C (for ethanol, 2-fluoroethanol, 2,2-difluoroethanol and 2,2,2-trifluoroethanol) or for 40 h at -60 °C (for 1,1,1,3,3,3-hexafluoro-2-propanol and triethylsilane-*d*). The reaction was quenched with sat. aq. NaHCO<sub>3</sub> followed by the dilution with EtOAc. The aqueous layer was extracted three times with EtOAc. The combined organic layers were washed with H<sub>2</sub>O and brine, dried over MgSO<sub>4</sub>, filtered off and concentrated under reduced pressure. Purification was performed by flash column chromatography to afford the corresponding coupled glycoside.

#### General procedure IV: DMF assisted pre-activation Tf<sub>2</sub>O/Ph<sub>2</sub>SO based glycosylation

To a solution of the donor (50 μmol, 1 eq.) in DCM (1 mL, 0.05 M), Ph<sub>2</sub>SO (13 mg, 65 μmol, 1.3 eq.) and TTBP (31 mg, 125 μmol, 2.5 eq.) were added. The solution was stirred over activated 3 Å molecular sieves (rods, size 1/16 in., Sigma Aldrich) for 30 min. The solution was cooled to –80 °C upon which Tf<sub>2</sub>O (11 μL, 65 μmol, 1.3 eq.) was added slowly. Subsequently, the solution was allowed to attain to –60 °C to secure full activation of the donor followed by cooling back to –80 °C after which DMF (61 μL, 0.8 mmol, 16 eq.) was added. The solution was stirred for 15 min at –80 °C followed by the addition of the acceptor (0.2 mL, 0.5 M solution, 2.0 eq.). The reaction was stirred overnight at 0 °C upon which the reaction was quenched with sat. aq. NaHCO<sub>3</sub> followed by the dilution with EtOAc. The aqueous layer was extracted three times with EtOAc. The combined organic layers were washed with H<sub>2</sub>O and brine, dried over MgSO<sub>4</sub>, filtered off and concentrated under reduced pressure. Purification was performed by flash column chromatography to afford the corresponding coupled glycoside.

#### General procedure V: TBAI assisted pre-activation Tf<sub>2</sub>O/Ph<sub>2</sub>SO based glycosylation

To a solution of the donor (50 μmol, 1 eq.) in DCM (1 mL, 0.05 M), Ph<sub>2</sub>SO (13 mg, 65 μmol, 1.3 eq.), TTBP (31 mg, 125 μmol, 2.5 eq.) and ethyl maleimide (12.5 mg, 100 μmol, 2.0 eq.) were added. The solution was stirred over activated 3 Å molecular sieves (rods, size 1/16 in., Sigma Aldrich) for 30 min. The solution was cooled to –80 °C upon which Tf<sub>2</sub>O (11 μL, 65 μmol, 1.3 eq.) was added slowly. Subsequently, the solution was allowed to attain to –60 °C to secure full activation of the donor followed by cooling back to –80 °C after which TBAI (148 mg, 0.4 mmol, 8 eq.) was added. The solution was stirred for 15 min at –80 °C followed by the addition of the acceptor (0.2 mL, 0.5 M solution, 2.0 eq.). The reaction was stirred overnight at 0 °C upon which the reaction was quenched with sat. aq. NaHCO<sub>3</sub> and sat. aq. thiosulfate sol. followed by the dilution with EtOAc. The aqueous layer was extracted three times with EtOAc. The combined organic layers were washed with H<sub>2</sub>O and brine, dried over MgSO<sub>4</sub>, filtered off and concentrated under reduced pressure. Purification was performed by flash column chromatography to afford the corresponding coupled glycoside.

#### General procedure VI: TMSOTf activation based glycosylation of imidates

A solution of the donor (22.5 μmol, 1.0 eq.) and acceptor (45 μmol, 2.0 eq.) in DCM (450 μL, 0.05 M) was stirred over activated 3 Å molecular sieves (rods, size 1/16 in., Sigma Aldrich) for 30 min. The solution was cooled to –80 °C upon which TMSOTf (9.0 μL of a 0.5 M solution, 0.2 eq.) was added slowly. Subsequently, the solution was allowed to attain to –10 °C and stirred for 16 h. The reaction was quenched with sat. aq. NaHCO<sub>3</sub> followed by the dilution with EtOAc. The aqueous layer was extracted three times with EtOAc. The combined organic layers were washed with H<sub>2</sub>O and brine, dried over MgSO<sub>4</sub>, filtered off and concentrated under reduced pressure. Purification was performed by flash column chromatography to afford the corresponding coupled glycoside.

### Preparation of the building blocks

#### Synthesis of compound 4

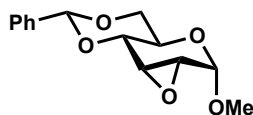

**Methyl 2,3-anhydro-4,6-O-benzylidene-α-D-allopyranoside (7).** Methyl α-D-glucopyranoside (167 g, 860 mmol) was dissolved in dry acetonitrile (1.7 L, 0.5 M), PhCH(OMe)<sub>2</sub> (142 mL, 950 mmol, 1.1 eq.) and iodine (21.8 g, 86 mmol, 0.1 eq.) were added. The mixture was stirred for 3 h at 50 °C. The solution was concentrated *in vacuo* and co-evaporated with toluene. The crude solid was recrystallized from EtOAc/pentane to give a white solid. The solid was dissolved in pyridine (1.7 L, 0.5 M), the solution was cooled on ice followed by the dropwise addition of MsCl (200 mL, 2.6 mol, 3.0 eq.), the solution was stirred for 15 h at room temperature. The solution was quenched by diluting with ice water (15 L). The resulting suspension was filtered, followed by washing with water. Co-evaporation with toluene yielded the crude product as a light brown solid. The crude product was divided into two equal portions. The

brown solid was dissolved in a 2:3 mixture of THF/MeOH (3.4 L, 0.125 M), KOH (72.4 g, 1290 mmol, 3.0 eq.) was added, and the solution was refluxed at 80 °C for 15 h, resulting in a thick brown suspension. After cooling to room temperature, both suspensions were combined and diluted with cold water (60 L). Filtration followed by washing with water yielded the crude product. Recrystallization (EtOAc/pentane) yielded the title compound as a white solid (124.7 g, 471.8 mmol, 55% over 3 steps). TLC:  $R_f$  0.4 (pentane:EtOAc, 4:6, v:v);  $[\alpha]_D^{20}$  217.6° (c 0.125, CHCl<sub>3</sub>); IR (neat, cm<sup>-1</sup>): 1074, 1144, 1391, 2988; <sup>1</sup>H NMR (400 MHz, CDCl<sub>3</sub>, HH-COSY, HSQC): δ 7.53 – 7.48 (m, 2H, CH<sub>arom</sub>), 7.41 – 7.34 (m, 3H, CH<sub>arom</sub>), 5.58 (s, 1H, CHPh), 4.90 (d,  $J$  = 2.7 Hz, 1H, H-1), 4.25 (ddd,  $J$  = 10.1, 5.0, 0.8 Hz, 1H, H-6), 4.09 (ddd,  $J$  = 10.3, 9.1, 5.0 Hz, 1H, H-5), 3.96 (dd,  $J$  = 9.1, 1.2 Hz, 1H, H-4), 3.69 (t,  $J$  = 10.3 Hz, 1H, H-6), 3.53 (d,  $J$  = 4.4 Hz, 1H, H-3), 3.50 (dd,  $J$  = 4.3, 2.8 Hz, 1H, H-2), 3.48 (s, 3H, CH<sub>3</sub> OMe); <sup>13</sup>C NMR (101 MHz, CDCl<sub>3</sub>, HSQC): δ 137.2 (C<sub>q-arom</sub>), 129.4, 128.5, 126.5 (CH<sub>arom</sub>), 102.9 (CHPh), 95.5 (C-1), 78.0 (C-4), 69.1 (C-6), 60.2 (C-5), 56.1 (CH<sub>3</sub> OMe), 53.3 (C-2), 50.9 (C-3); HRMS: [M+Na]<sup>+</sup> calcd for C<sub>14</sub>H<sub>16</sub>O<sub>5</sub>Na 287.0895, found 287.0897.

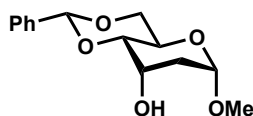

**Methyl 4,6-O-benzylidene-2-deoxy-D-altropyranoside (8).** Compound 7 (124.7 g, 471.8 mmol) was divided into two equal portions of 236 mmol. Compound 7 was dissolved in Et<sub>2</sub>O (3.9 L, 0.06 M), and LiAlH<sub>4</sub> (119 mL, 476 mmol, 2 eq., 4 M solution in THF) was then added drop-wise. After 2 h of refluxing at 45 °C the mixture was led to cool to room temperature and quenched with 20 mL of water. The excess water was removed by drying over MgSO<sub>4</sub>, after which the mixture was filtered, and concentrated *in vacuo* to yield a white crystalline solid. The crude products were combined and recrystallized (Et<sub>2</sub>O) to afford the title compound (98.5 grams, 369.9 mmol, 78%) as a white solid. TLC:  $R_f$  0.5 (pentane:EtOAc, 4:6, v:v);  $[\alpha]_D^{20}$  84.2° (c 0.5, CHCl<sub>3</sub>); IR (neat, cm<sup>-1</sup>): 1045, 1099, 1381, 2932, 3510; <sup>1</sup>H NMR (400 MHz, CDCl<sub>3</sub>, HH-COSY, HSQC): δ 7.53 – 7.49 (m, 2H, CH<sub>arom</sub>), 7.40 – 7.33 (m, 3H, CH<sub>arom</sub>), 5.63 (s, 1H, CHPh), 4.80 (d,  $J$  = 3.9 Hz, 1H, H-1), 4.33 (dd,  $J$  = 10.1, 5.1 Hz, 1H, H-6), 4.28 – 4.22 (m, 1H, H-5), 4.19 (dq,  $J$  = 6.3, 3.1 Hz, 1H, H-3), 3.78 (t,  $J$  = 10.2 Hz, 1H, H-6), 3.62 (dd,  $J$  = 9.6, 2.8 Hz, 1H, H-4), 3.42 (s, 3H, CH<sub>3</sub> OMe), 3.03 (d,  $J$  = 6.7 Hz, 1H, 3-OH), 2.20 (ddd,  $J$  = 14.9, 3.2, 1.0 Hz, 1H, H-2), 2.01 (dt,  $J$  = 14.9, 3.7 Hz, 1H, H-2); <sup>13</sup>C NMR (101 MHz, CDCl<sub>3</sub>, HSQC): δ 137.4 (C<sub>q-arom</sub>), 129.2, 128.4, 126.4 (CH<sub>arom</sub>), 102.2 (CHPh), 98.8 (C-1), 79.8 (C-4), 69.5 (C-6), 65.2 (C-3), 58.3 (C-5), 55.6 (CH<sub>3</sub> OMe), 35.6 (C-2); HRMS: [M+Na]<sup>+</sup> calcd for C<sub>14</sub>H<sub>18</sub>O<sub>5</sub>Na 289.1052, found 289.1068.

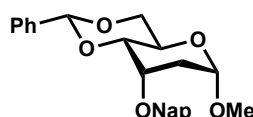

**Methyl 4,6-O-benzylidene-2-deoxy-3-O-(2-methylnaphthalene)-α-D-altropyranoside (9).** Compound 8 (98.5 g, 369.9 mmol) was dissolved in DMF (925 mL, 0.4 M) under N<sub>2</sub> atmosphere and cooled on ice. NaH (17.8 g, 443.9 mmol, 1.2 eq., 60% dispersion in mineral oil) was added portion-wise. Subsequently, 2-(bromomethyl)naphthalene (98.1 g, 443.9 mmol, 1.2 eq.) was added portion-wise over a time span of 30 min. The solution was stirred for 1 h after which the solution was concentrated to 1/5<sup>th</sup> of its original volume. The solution was then quenched with H<sub>2</sub>O followed by further dilution with Et<sub>2</sub>O and H<sub>2</sub>O. The aqueous layer was extracted 5 times with Et<sub>2</sub>O after which the combined organic layers were washed with H<sub>2</sub>O, sat. aq. NaHCO<sub>3</sub> and brine, respectively. The organic layer was dried over MgSO<sub>4</sub>, filtered, and concentrated *in vacuo* to yield the crude product as a colorless oil. Flash column chromatography (90:10 → 70:30; pentane:EtOAc) yielded the title compound (150.4 g, 369.9 mmol, *quant.*) as a yellow oil. TLC:  $R_f$  0.7 (pentane:EtOAc, 1:1, v:v);  $[\alpha]_D^{20}$  44.3° (c 1.0, CHCl<sub>3</sub>); IR (neat, cm<sup>-1</sup>): 474, 699, 748, 1007, 1044, 1099, 1128; <sup>1</sup>H NMR (400 MHz, CDCl<sub>3</sub>, HH-COSY, HSQC): δ 7.94 – 7.62 (m, 4H, CH<sub>arom</sub>), 7.60 – 7.33 (m, 8H, CH<sub>arom</sub>), 5.57 (s, 1H, CHPh), 4.97 (s, 2H, CH<sub>2</sub> Nap), 4.74 (d,  $J$  = 4.6 Hz, 1H, H-1), 4.49 (td,  $J$  = 10.1, 5.3 Hz, 1H, H-5), 4.34 (dd,  $J$  = 10.3, 5.3 Hz, 1H, H-6), 4.01 (q,  $J$  = 3.0 Hz, 1H, H-3), 3.73 (t,  $J$  = 10.4 Hz, 1H, H-6), 3.70 (dd,  $J$  = 9.5, 2.9 Hz, 1H, H-4), 3.44 (s, 3H, CH<sub>3</sub> OMe), 2.24 (dd,  $J$  = 14.7, 2.5 Hz, 1H, H-2), 1.92 (ddd,  $J$  = 15.0, 4.6, 3.8 Hz, 1H, H-2); <sup>13</sup>C NMR (101 MHz, CDCl<sub>3</sub>, HSQC):

$\delta$  138.0, 136.7, 133.4, 133.0 ( $C_{q\text{-arom}}$ ), 129.2, 128.5, 128.0, 128.0, 127.8, 126.5, 126.4, 126.0, 126.0, 125.7 ( $CH_{\text{arom}}$ ), 102.4 ( $CHPh$ ), 98.1 (C-1), 80.5 (C-4), 72.3 ( $CH_2$  Nap), 70.3 (C-3), 69.8 (C-6), 58.4 (C-5), 55.8 ( $CH_3$  OMe), 34.6 (C-2); HRMS:  $[M+Na]^+$  calcd for  $C_{25}H_{26}O_5Na$  429.1678, found 429.1680.

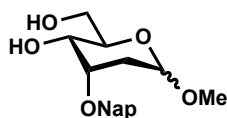

**Methyl 2-deoxy-3-O-(2-methylnaphtalene)-D-altropyranoside (10).** Iodine (9.4 g, 37 mmol, 0.1 eq.) was added to a stirred solution of **9** (150.4 g, 369.9 mmol) in MeOH (1.8 L, 0.2 M). The solution was stirred at room temperature for 18 h after which the reaction was quenched with sat. aq.  $Na_2S_2O_3$  and diluted with EtOAc and  $H_2O$ . The aqueous layer was extensively extracted with EtOAc, followed by drying the combined organic layers over  $MgSO_4$ . The organic layer was then filtered, and concentrated *in vacuo* to yield the crude product as a yellow oil. Flash column chromatography (50:50  $\rightarrow$  20:80; pentane:EtOAc) yielded the title compound (117.1 g, 368 mmol, 99%,  $\alpha:\beta$ ; 50:50) as a colorless oil. TLC:  $R_f$  0.3 (pentane:EtOAc, 1:4, v:v); IR (neat,  $cm^{-1}$ ): 750, 817, 1041, 2924, 3354; Data of the major stereoisomer ( $\alpha$ -anomer):  $^1H$  NMR (400 MHz,  $CDCl_3$ , HH-COSY, HSQC):  $\delta$  7.89 – 7.75 (m, 4H,  $CH_{\text{arom}}$ ), 7.54 – 7.42 (m, 3H,  $CH_{\text{arom}}$ ), 4.95 (d,  $J = 11.5$  Hz, 1H,  $CHH$  Nap), 4.75 (d,  $J = 3.5$  Hz, 2H, H-1), 4.56 (d,  $J = 11.5$  Hz, 1H,  $CHH$  Nap), 4.05 – 3.57 (m, 5H, H-3, H-4, H-5, H-6, H-6), 3.40 (s, 3H,  $CH_3$  OMe), 2.72 (bs, 1H, OH), 2.52 (bs, 1H, OH), 2.37 (ddd,  $J = 15.2, 3.0, 0.9$  Hz, 1H, H-2), 1.75 (ddd,  $J = 15.2, 4.6, 3.4$  Hz, 1H, H-2);  $^{13}C$  NMR (101 MHz,  $CDCl_3$ , HSQC):  $\delta$  135.4, 133.2, 133.0 ( $C_{q\text{-arom}}$ ), 128.3, 127.9, 127.7, 126.8, 126.2, 126.0, 126.0 ( $CH_{\text{arom}}$ ), 97.4 (C-1), 72.8 (C-3), 70.6 ( $CH_2$  Nap), 68.2 (C-4), 67.6 (C-5), 63.1 (C-6), 55.3 ( $CH_3$  OMe), 31.2 (C-2); Diagnostic signals of the minor stereoisomer ( $\beta$ -anomer):  $^1H$  NMR (400 MHz,  $CDCl_3$ , HH-COSY, HSQC):  $\delta$  4.89 (d,  $J = 11.7$  Hz, 1H,  $CHH$  Nap), 4.77 (d,  $J = 2.0$  Hz, 1H, H-1), 4.66 (d,  $J = 11.7$  Hz, 1H,  $CHH$  Nap), 3.50 (s, 3H,  $CH_3$  OMe), 2.31 (ddd,  $J = 14.2, 3.7, 2.1$  Hz, 1H, H-2), 1.62 (ddd,  $J = 14.1, 9.4, 2.6$  Hz, 1H, H-2);  $^{13}C$  NMR (101 MHz,  $CDCl_3$  HSQC):  $\delta$  99.1 (C-1), 71.7 ( $CH_2$  Nap), 56.7 ( $CH_3$  OMe), 34.0 (C-2); HRMS:  $[M+Na]^+$  calcd for  $C_{18}H_{22}O_5Na$  341.1365, found 341.1364.

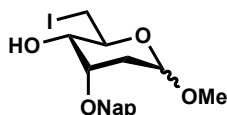

**Methyl 2,6-dideoxy-6-C-iodo-3-O-(2-methylnaphtalene)-D-altropyranoside (11).** To a stirred solution of **10** (114.6 g, 360 mmol) in toluene (2.5 L, 0.12 M), imidazole (71.4 g, 1.1 mol, 3.0 eq.) and triphenylphosphine (141.6 g, 540 mmol, 1.5 eq.) were added. The solution was heated to 75  $^{\circ}C$  upon which an iodine (127.9 g, 504 mmol, 1.4 eq.) solution in toluene (500 mL) was added dropwise over a time span of 15 min. After stirring for 30 min at 75  $^{\circ}C$  the solution was allowed to cool down to room temperature and quenched with sat. aq.  $NaHCO_3$  and sat. aq.  $Na_2S_2O_3$  and further diluted with EtOAc. The organic layer was washed with  $H_2O$ , sat. aq.  $NaHCO_3$  and brine, respectively. Subsequently, the organic layer was dried over  $MgSO_4$ , filtered, and concentrated *in vacuo* to yield the crude product. Flash column chromatography (90:10  $\rightarrow$  60:40; pentane:EtOAc) yielded the title compound (101.7 g, 237.4 mmol, 66%,  $\alpha:\beta$ ; 67:33) as a colorless oil. TLC:  $R_f$  0.6 (pentane:EtOAc, 4:1, v:v); IR (neat,  $cm^{-1}$ ): 750, 815, 1018, 1080, 2926, 3402; Data of the major stereoisomer ( $\alpha$ -anomer):  $^1H$  NMR (400 MHz,  $CDCl_3$ , HH-COSY, HSQC):  $\delta$  8.07 – 7.68 (m, 4H,  $CH_{\text{arom}}$ ), 7.63 – 7.38 (m, 3H,  $CH_{\text{arom}}$ ), 4.94 (d,  $J = 11.4$  Hz, 1H,  $CHH$  Nap), 4.78 (d,  $J = 4.4$  Hz, 1H, H-1), 4.54 (d,  $J = 11.4$  Hz, 1H,  $CHH$  Nap), 3.88 (q,  $J = 3.2$  Hz, 1H, H-3), 3.79 (ddd,  $J = 9.7, 7.7, 2.4$  Hz, 1H, H-5), 3.64 (dd,  $J = 10.7, 2.5$  Hz, 1H, H-6), 3.49 (s, 3H,  $CH_3$  OMe), 3.40 (td,  $J = 10.3, 3.7$  Hz, 1H, H-4), 3.34 (dd,  $J = 10.6, 7.6$  Hz, 1H, H-6), 2.69 (d,  $J = 10.8$  Hz, 1H, 4-OH), 2.38 (ddd,  $J = 15.2, 2.9, 1.0$  Hz, 1H, H-2), 1.77 (ddd,  $J = 15.2, 4.5, 3.4$  Hz, 1H, H-2);  $^{13}C$  NMR (101 MHz,  $CDCl_3$ , HSQC):  $\delta$  135.3, 133.2, 133.1 ( $C_{q\text{-arom}}$ ), 128.4, 127.9, 127.8, 126.9, 126.3, 126.1, 126.0 ( $CH_{\text{arom}}$ ), 97.7 (C-1), 72.8 (C-3), 71.1 (C-4), 70.7 ( $CH_2$  Nap), 67.9 (C-5), 55.7 ( $CH_3$  OMe), 31.4 (C-2), 8.9 (C-6); Diagnostic signals of the minor stereoisomer ( $\beta$ -anomer):  $^1H$  NMR (400 MHz,  $CDCl_3$ , HH-COSY, HSQC):  $\delta$  4.87 (d,  $J = 11.6$  Hz, 1H,  $CHH$  Nap), 4.75 (dd,  $J = 9.6, 2.0$  Hz, 1H, H-1), 4.60 (d,  $J =$



11.6 Hz, 1H, CHH Nap), 3.93 (q,  $J = 3.3$  Hz, 1H, H-3), 3.56 (s, 3H, CH<sub>3</sub> OMe), 3.27 (dd,  $J = 10.2, 8.1$  Hz, 1H, H-6), 2.47 (d,  $J = 10.7$  Hz, 1H, 4-OH), 2.32 (ddd,  $J = 14.2, 3.4, 2.1$  Hz, 1H, H-2), 1.64 (ddd,  $J = 14.2, 9.6, 2.6$  Hz, 1H, H-2); <sup>13</sup>C NMR (101 MHz, CDCl<sub>3</sub>, HSQC):  $\delta$  99.1 (C-1), 75.3 (C-3), 74.4 (C-4), 71.8 (CH<sub>2</sub> Nap), 71.3 (C-5), 56.7 (CH<sub>3</sub> OMe), 34.2 (C-2), 7.7 (C-6); HRMS: [M+Na]<sup>+</sup> calcd for C<sub>18</sub>H<sub>21</sub>O<sub>4</sub>Na 451.0382, found 451.0385.

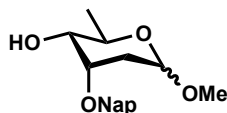

**Methyl 2,6-dideoxy-3-O-(2-methylnaphthalene)-D-altropyranoside (12).** Compound **11** (101.7 g, 237.4 mmol) was dissolved in dry *t*-BuOH (3.4 L, 0.07 M) and stirred under N<sub>2</sub> atmosphere. Subsequently, NaBH<sub>3</sub>CN (22.4 g, 356.1 mmol, 1.5 eq) and AIBN (46.8 g, 284.9 mmol, 1.2 eq.) were added. The solution was refluxed at 85 °C for 17 h. After cooling to room temperature, the solution was concentrated to a tenth of its original volume and diluted with EtOAc and H<sub>2</sub>O, the aqueous layer was extracted twice, followed by washing the combined organic layers with H<sub>2</sub>O, sat. aq. NaHCO<sub>3</sub> and brine, respectively. Subsequently, the organic layer was dried over MgSO<sub>4</sub>, filtered, and concentrated *in vacuo* to yield the crude product as a yellow oil. Flash column chromatography (80:20 → 60:40; pentane:EtOAc) yielded the title compound (52.9 g, 175 mmol, 74%,  $\alpha$ : $\beta$ ; 67:33) as a colorless oil. TLC: R<sub>f</sub> 0.3 (pentane:EtOAc, 4:1, v:v); IR (neat, cm<sup>-1</sup>): 748, 817, 1055, 1128, 2927; Data of the major stereoisomer ( $\alpha$ -anomer): <sup>1</sup>H NMR (400 MHz, CDCl<sub>3</sub>, HH-COSY, HSQC):  $\delta$  7.94 – 7.75 (m, 4H, CH<sub>arom</sub>), 7.57 – 7.42 (m, 3H, CH<sub>arom</sub>), 4.95 (d,  $J = 11.6$  Hz, 1H, CHH Nap), 4.70 (d,  $J = 4.8$  Hz, 1H, H-1), 4.57 (d,  $J = 11.6$  Hz, 1H, CHH Nap), 3.99 (dq,  $J = 9.4, 6.4$  Hz, 1H, H-5), 3.88 (q,  $J = 3.4$  Hz, 1H, H-3), 3.40 (s, 3H, CH<sub>3</sub> OMe), 3.28 (dd,  $J = 9.4, 3.6$  Hz, 1H, H-4), 2.61 – 2.49 (bs, 1H, 4-OH), 2.36 (ddd,  $J = 15.0, 3.1, 1.2$  Hz, 1H, H-2), 1.78 (ddd,  $J = 15.1, 4.5, 3.5$  Hz, 1H, H-2), 1.29 (d,  $J = 6.4$  Hz, 3H, H-6); <sup>13</sup>C NMR (101 MHz, CDCl<sub>3</sub>, HSQC):  $\delta$  135.6, 133.3, 133.1 (C<sub>q-arom</sub>), 128.4, 128.0, 127.9, 127.8, 126.9, 126.3, 126.1 (CH<sub>arom</sub>), 97.4 (C-1), 73.0 (C-3), 72.3 (C-4), 70.7 (CH<sub>2</sub> Nap), 64.6 (C-5), 55.4 (CH<sub>3</sub> OMe), 31.6 (C-2), 18.0 (C-6); Diagnostic signals of the minor stereoisomer ( $\beta$ -anomer): <sup>1</sup>H NMR (400 MHz, CDCl<sub>3</sub>, HH-COSY, HSQC):  $\delta$  4.89 (d,  $J = 11.6$  Hz, 1H, CHH Nap), 4.63 (d,  $J = 11.6$  Hz, 1H, CHH Nap), 3.72 (dq,  $J = 9.4, 6.3$  Hz, 1H, H-5), 3.50 (s, 3H, CH<sub>3</sub> OMe), 1.64 (ddd,  $J = 14.1, 9.5, 2.7$  Hz, 1H, H-2), 1.33 (d,  $J = 6.3$  Hz, 3H, H-6); <sup>13</sup>C NMR (101 MHz, CDCl<sub>3</sub>, HSQC):  $\delta$  99.0 (C-1), 75.5 (C-3), 72.7 (C-4), 71.7 (CH<sub>2</sub> Nap), 71.0 (C-5), 56.6 (CH<sub>3</sub> OMe), 34.3 (C-2), 18.3 (C-6); HRMS: [M+Na]<sup>+</sup> calcd for C<sub>18</sub>H<sub>22</sub>O<sub>4</sub>Na 325.1416, found 325.1418.

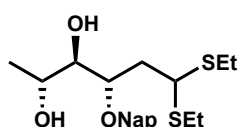

**2,6-Dideoxy-1,1-diethyl-thioacetal-3-O-(2-methylnaphthalene)-D-altrose (13).** Compound **12** (52.9 g, 175 mmol) was dissolved in 25% v:v aqueous acetic acid (3.5 L, 0.05 M) and refluxed at 100 °C for 1 h after which the solution was cooled to 0 °C. Subsequently, solid NaHCO<sub>3</sub> (583.8 g, 6.95 mol) was added to quench 50% of the acetic acid. The solution was then extracted with EtOAc (3x) and the combined organic layers were dried over MgSO<sub>4</sub>, filtered, and concentrated *in vacuo* to yield the crude product as an orange oil. TLC: R<sub>f</sub> 0.3 (pentane:EtOAc, 1:1, v:v). The crude product was suspended in ethanethiol (69.4 mL, 962.4 mmol, 5.5 eq.) and cooled on ice, HCl (29.7 mL, 962.4 mmol, 5.5 eq., 37% aqueous solution) was added while stirring vigorously. The solution was stirred for 3 h at 0 °C upon which the reaction was neutralized with sat. aq. NaHCO<sub>3</sub> and diluted with EtOAc and H<sub>2</sub>O. The aqueous layer was extracted 3x with EtOAc and the combined organic layers were washed with H<sub>2</sub>O, sat. aq. NaHCO<sub>3</sub> and brine, respectively. Subsequently, the organic layer was dried over MgSO<sub>4</sub>, filtered, and concentrated *in vacuo* to yield the crude product. Flash column chromatography (90:10 → 50:50; pentane:EtOAc) yielded the title compound (46.1 g, 116.8 mmol, 67%) as a yellow oil. TLC: R<sub>f</sub> 0.6 (pentane:EtOAc, 1:1, v:v);  $[\alpha]_D^{20} -13.3^\circ$  (c 1.0, CHCl<sub>3</sub>); IR (neat, cm<sup>-1</sup>): 750, 815, 1064, 1265, 1373, 1450, 2926, 2968, 3459; <sup>1</sup>H NMR (400 MHz, CDCl<sub>3</sub>, HH-COSY, HSQC):  $\delta$  7.87 – 7.77 (m, 4H, CH<sub>arom</sub>), 7.53 – 7.43 (m, 3H,

CH<sub>arom</sub>), 4.78 (d, *J* = 11.5 Hz, 1H, CHH Nap), 4.74 (d, *J* = 11.5 Hz, 1H, CHH Nap), 4.08 – 4.02 (m, 2H, H-1, H-3), 3.87 (p, *J* = 6.2 Hz, 1H, H-5), 3.75 (dd, *J* = 6.3, 4.3 Hz, 1H, H-4), 2.96 (bs, 1H, 4-OH), 2.75 – 2.50 (m, 5H, CH<sub>2</sub>CH<sub>3</sub>, CH<sub>2</sub>CH<sub>3</sub>, 5-OH), 2.29 – 2.07 (m, 2H, H-2), 1.29 – 1.21 (m, 6H, H-6, CH<sub>2</sub>CH<sub>3</sub>), 1.19 (t, *J* = 7.5 Hz, 3H, CH<sub>2</sub>CH<sub>3</sub>); <sup>13</sup>C NMR (101 MHz, CDCl<sub>3</sub>, HSQC): δ 135.4, 133.2, 133.0 (C<sub>q- arom</sub>), 128.3, 127.9, 127.7, 126.8, 126.2, 126.0, 125.9 (CH<sub>arom</sub>), 77.8 (C-1/C-3), 75.1 (C-4), 72.1 (CH<sub>2</sub> Nap), 68.1 (C-5), 47.8 (C-3/C-1), 36.5 (C-2), 24.4 (CH<sub>2</sub>CH<sub>3</sub>), 23.6 (CH<sub>2</sub>CH<sub>3</sub>), 19.3 (C-6), 14.5 (CH<sub>2</sub>CH<sub>3</sub>), 14.3 (CH<sub>2</sub>CH<sub>3</sub>); HRMS: [M+Na]<sup>+</sup> calcd for C<sub>21</sub>H<sub>30</sub>O<sub>3</sub>S<sub>2</sub>Na 417.1534, found 417.1533.

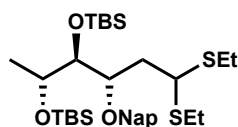

**2,6-Dideoxy-1,1-diethyl-thioacetal-3-O-(2-methylnaphthalene)-4,5-O-di-tert-butylidimethylsilyl-D-altrose (14).** Pyridine (140 mL, 75 mmol, 15.0 eq.) was added to a solution of compound **13** (46 g, 116.5 mmol) in DCM (1.2 L, 0.1 M), after which the solution was cooled on ice, and TBSOTf (80 mL, 350 mmol, 3.0 eq.) was added dropwise. After stirring for 10 min on ice the reaction was refluxed at 40 °C for 6 h. The reaction mixture was then concentrated to 1/4<sup>th</sup> of its original volume and quenched with sat. aq. NaHCO<sub>3</sub> followed by further dilution with Et<sub>2</sub>O and H<sub>2</sub>O. The aqueous layer was extracted with Et<sub>2</sub>O (3x) followed by washing the combined organic layers with H<sub>2</sub>O, sat. aq. NaHCO<sub>3</sub> and brine, respectively. Subsequently, the organic layer was dried over MgSO<sub>4</sub>, filtered, and concentrated *in vacuo* to yield the crude product. Flash column chromatography (98:2 → 95:5; pentane: Et<sub>2</sub>O) yielded the title compound (45 g, 72.2 mmol, 62%) as a colorless oil. TLC: R<sub>f</sub> 0.5 (pentane:toluene, 9:1, v:v); [α]<sub>D</sub><sup>20</sup> –31.1° (c 1.0, CHCl<sub>3</sub>); IR (neat, cm<sup>-1</sup>): 756, 835, 1105, 1253, 2927; <sup>1</sup>H NMR (400 MHz, CDCl<sub>3</sub>, HH-COSY, HSQC): δ 7.87 – 7.76 (m, 4H, CH<sub>arom</sub>), 7.51 – 7.43 (m, 3H, CH<sub>arom</sub>), 4.87 (dd, *J* = 11.8, 0.8 Hz, 1H, CHH Nap), 4.66 (dd, *J* = 11.7, 0.8 Hz, 1H, CHH Nap), 4.09 – 3.97 (m, 2H, H-1, H-3), 3.79 (p, *J* = 6.1 Hz, 1H, H-5), 3.70 (dd, *J* = 6.0, 2.4 Hz, 1H, H-4), 2.70 – 2.44 (m, 4H, CH<sub>2</sub>CH<sub>3</sub>, CH<sub>2</sub>CH<sub>3</sub>), 2.26 (ddd, *J* = 14.9, 10.4, 3.5 Hz, 1H, H-2), 1.90 (ddd, *J* = 14.9, 11.3, 2.5 Hz, 1H, H-2), 1.25 (t, *J* = 7.4 Hz, 3H, CH<sub>2</sub>CH<sub>3</sub>), 1.21 (d, *J* = 6.1 Hz, 3H, H-6), 1.13 (t, *J* = 7.4 Hz, 3H, CH<sub>2</sub>CH<sub>3</sub>), 1.02 – 0.84 (m, 18H, C(CH<sub>3</sub>)<sub>3</sub>, C(CH<sub>3</sub>)<sub>3</sub>), 0.18 – 0.06 (m, 12H, SiCH<sub>3</sub>, SiCH<sub>3</sub>, SiCH<sub>3</sub>, SiCH<sub>3</sub>); <sup>13</sup>C NMR (101 MHz, CDCl<sub>3</sub>, HSQC): δ 136.5, 133.4, 133.0 (C<sub>q- arom</sub>), 128.0, 128.0, 127.8, 126.3, 126.1, 126.0, 125.8 (CH<sub>arom</sub>), 78.8 (C-4), 78.6 (C-1/C-3), 72.4 (CH<sub>2</sub> Nap), 69.8 (C-5), 48.1 (C-3/C-1), 37.4 (C-2), 26.3 (C(CH<sub>3</sub>)<sub>3</sub>), 25.8 (C(CH<sub>3</sub>)<sub>3</sub>), 24.5 (CH<sub>2</sub>CH<sub>3</sub>), 24.2 (CH<sub>2</sub>CH<sub>3</sub>), 20.8 (C-6), 18.5 (C(CH<sub>3</sub>)<sub>3</sub>), 18.2 (C(CH<sub>3</sub>)<sub>3</sub>), 14.8 (CH<sub>2</sub>CH<sub>3</sub>), 14.4 (CH<sub>2</sub>CH<sub>3</sub>), -2.8 (SiCH<sub>3</sub>), -3.7 (SiCH<sub>3</sub>), -3.9 (SiCH<sub>3</sub>), -4.3 (SiCH<sub>3</sub>); HRMS: [M+Na]<sup>+</sup> calcd for C<sub>33</sub>H<sub>58</sub>O<sub>3</sub>S<sub>2</sub>Si<sub>2</sub>Na 645.3264, found 645.3258.

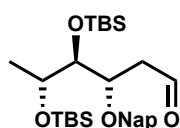

**2,6-Dideoxy-3-O-(2-methylnaphthalene)-4,5-O-di-tert-butylidimethylsilyl-D-altrose (15).** Compound **14** (45 g, 72.2 mmol) was dissolved in acetone (480 mL, 0.15 M) and H<sub>2</sub>O (11 mL, 0.6 mol, 8.5 eq.) and cooled on ice. NaHCO<sub>3</sub> (27.3 g, 325 mmol, 4.5 eq.) and iodine (40.3 g, 160 mmol, 2.2 eq.) were added and the mixture was allowed to reach room temperature. After stirring for 6 h the mixture was quenched with sat. aq. Na<sub>2</sub>S<sub>2</sub>O<sub>3</sub> and further diluted with Et<sub>2</sub>O and H<sub>2</sub>O. The aqueous layer was extracted with Et<sub>2</sub>O (3x) followed by washing the combined organic layers with H<sub>2</sub>O, sat. aq. NaHCO<sub>3</sub> and brine, respectively. Subsequently, the organic layer was dried over MgSO<sub>4</sub>, filtered, and concentrated *in vacuo* to yield the crude product as a colorless oil. Flash column chromatography (99:1 → 90:10; pentane:Et<sub>2</sub>O) yielded the title compound (30.1 g, 58.2 mmol, 81%) as a colorless oil. TLC: R<sub>f</sub> 0.2 (pentane, Et<sub>2</sub>O, 40:1, v:v); [α]<sub>D</sub><sup>20</sup> –23.2° (c 1.0, CHCl<sub>3</sub>); IR (neat, cm<sup>-1</sup>): 775, 835, 1101, 1253, 1471, 1728, 2927; <sup>1</sup>H NMR (400 MHz, CDCl<sub>3</sub>, HH-COSY, HSQC): δ 9.79 (dd, *J* = 2.8, 1.6 Hz, 1H, H-1), 7.86 – 7.72 (m, 4H, CH<sub>arom</sub>), 7.54 – 7.40 (m, 3H, CH<sub>arom</sub>), 4.76 (d, *J* = 11.7 Hz, 1H, CHH Nap), 4.66 (d, *J* = 11.8 Hz, 1H, CHH Nap), 4.24 (ddd, *J* = 8.4, 3.2, 2.5 Hz, 1H, H-3), 3.76 (dd, *J* = 6.2, 2.5 Hz, 1H, H-4), 3.69 (p, *J* = 6.1 Hz, 1H, H-5), 2.75 (ddd, *J* = 16.9, 8.4, 2.8 Hz, 1H, H-2), 2.60 (ddd, *J* = 17.0, 3.3, 1.6 Hz, 1H, H-2), 1.17 (d, *J* = 6.0 Hz, 3H, H-6), 0.87 (d, *J* = 22.8 Hz, 18H, C(CH<sub>3</sub>)<sub>3</sub>, C(CH<sub>3</sub>)<sub>3</sub>), 0.10 (d, *J* = 4.1 Hz, 12H, SiCH<sub>3</sub>, SiCH<sub>3</sub>, SiCH<sub>3</sub>).

SiCH<sub>3</sub>); <sup>13</sup>C NMR (101 MHz, CDCl<sub>3</sub>, HSQC): δ 202.0 (C-1), 135.6, 133.3, 133.1 (C<sub>q-*arom*</sub>), 128.2, 128.0, 127.8, 126.7, 126.1, 126.0, 125.9 (CH<sub>*arom*</sub>), 78.1 (C-4), 75.2 (C-3), 71.8 (CH<sub>2</sub> Nap), 70.0 (C-5), 44.3 (C-2), 26.2 (C(CH<sub>3</sub>)<sub>3</sub>), 26.0 (C(CH<sub>3</sub>)<sub>3</sub>), 20.7 (C-6), 18.4 (C(CH<sub>3</sub>)<sub>3</sub>), 18.0 (C(CH<sub>3</sub>)<sub>3</sub>), -3.9 (SiCH<sub>3</sub>), -4.0 (SiCH<sub>3</sub>), -4.3 (SiCH<sub>3</sub>), -4.7 (SiCH<sub>3</sub>); HRMS: [M+Na]<sup>+</sup> calcd for C<sub>29</sub>H<sub>48</sub>O<sub>4</sub>Si<sub>2</sub>Na 539.2989, found 539.2986.

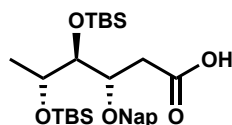

**2,6-Dideoxy-3-O-(2-methylnaphthalene)-4,5-O-di-*tert*-butyldimethylsilyl-D-altronic acid (16).** To a stirred solution of **15** (30 g, 58 mmol) in *t*-BuOH (0.5 L, 0.12 M) and aq. NaH<sub>2</sub>PO<sub>4</sub> (266 mL, 5% w:w) an aqueous KMnO<sub>4</sub> solution (157 mL, 157 mmol, 2.7 eq., 1 M) was added. The reaction mixture was stirred for 3 h after which an excess of solid Na<sub>2</sub>S<sub>2</sub>O<sub>3</sub> was added. After the mixture had turned brown the solution was filtered over Celite® Hyflo Supercel (Merck) and was rinsed with Et<sub>2</sub>O and H<sub>2</sub>O. The aqueous layer was extracted with Et<sub>2</sub>O (3x) followed by washing the combined organic layers with H<sub>2</sub>O, sat. aq. NaHCO<sub>3</sub> and brine, respectively. Subsequently, the organic layer was dried over MgSO<sub>4</sub>, filtered, and concentrated *in vacuo* to yield the crude product as a colorless oil. Flash column chromatography (95:5 → 80:20; pentane:Et<sub>2</sub>O) yielded the title compound (23.4 g, 43.9 mmol, 75%) as a colorless oil. TLC: R<sub>f</sub> 0.3 (pentane:EtOAc, 9:1, v:v); [α]<sub>D</sub><sup>20</sup> -20.1° (c 1.0, CHCl<sub>3</sub>); IR (neat, cm<sup>-1</sup>): 775, 829, 948, 1107, 1253, 1710, 2927; <sup>1</sup>H NMR (400 MHz, CDCl<sub>3</sub>, HH-COSY, HSQC): δ 7.89 – 7.73 (m, 4H, CH<sub>*arom*</sub>), 7.50 – 7.39 (m, 3H, CH<sub>*arom*</sub>), 4.76 (d, *J* = 11.6 Hz, 1H, CHH Nap), 4.70 (d, *J* = 11.5 Hz, 1H, CHH Nap), 4.20 (td, *J* = 6.1, 2.0 Hz, 1H, H-3), 3.75 – 3.67 (m, 2H, H-4, H-5), 2.68 (d, *J* = 6.1 Hz, 2H, H-2), 1.17 (d, *J* = 5.8 Hz, 3H, H-6), 0.91 – 0.85 (m, 18H, C(CH<sub>3</sub>)<sub>3</sub>, C(CH<sub>3</sub>)<sub>3</sub>), 0.11 – 0.04 (m, 12H, SiCH<sub>3</sub>, SiCH<sub>3</sub>, SiCH<sub>3</sub>, SiCH<sub>3</sub>); <sup>13</sup>C NMR (101 MHz, CDCl<sub>3</sub>, HSQC): δ 178.4 (C-1), 135.8, 133.3, 133.0 (C<sub>q-*arom*</sub>), 128.1, 128.0, 127.8, 126.6, 126.1, 126.1, 125.8 (CH<sub>*arom*</sub>), 78.1 (C-4/C-5), 77.1 (C-3), 72.4 (CH<sub>2</sub> Nap), 70.0 (C-5/C-4), 35.8 (C-2), 26.2 (C(CH<sub>3</sub>)<sub>3</sub>), 26.0 (C(CH<sub>3</sub>)<sub>3</sub>), 20.6 (C-6), 18.5 (C(CH<sub>3</sub>)<sub>3</sub>), 18.1 (C(CH<sub>3</sub>)<sub>3</sub>), -3.9 (SiCH<sub>3</sub>), -4.0 (SiCH<sub>3</sub>), -4.4 (SiCH<sub>3</sub>), -4.7 (SiCH<sub>3</sub>); HRMS: [M+Na]<sup>+</sup> calcd for C<sub>29</sub>H<sub>48</sub>O<sub>5</sub>Si<sub>2</sub>Na 555.2938, found 345.1316.

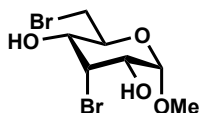

**Methyl 3,6-dibromo-3,6-dideoxy-α-D-allopyranoside (17).** A mixture of methyl α-D-glucopyranoside (32.5 g, 167 mmol), 2,4,5-tribromoimidazole (102 g, 335 mmol, 2.0 eq.) and triphenylphosphine (87.8 g, 335 mmol, 2.0 eq.) in toluene (2.7 L, 63 mM) was refluxed at 125 °C for 6 h. The mixture was allowed to cool to room temperature and concentrated *in vacuo*, yielding a dark brown syrup. Flash column chromatography (90:10 → 60:40; pentane:EtOAc) yielded the product as a mixture of methyl 3,6-dibromo-3,6-dideoxy-α-D-allopyranoside and triphenylphosphine oxide. The mixture could be separated by flash column chromatography (60:40 → 40:60; pentane:Et<sub>2</sub>O) to yield the title compound (32 g, 100 mmol, 60%) as a white solid. TLC: R<sub>f</sub> 0.5 (pentane:EtOAc, 4:6, v:v); [α]<sub>D</sub><sup>20</sup> 63.3° (c 1.0, CHCl<sub>3</sub>); IR (neat, cm<sup>-1</sup>): 1161, 1209, 1263, 2909, 3451; <sup>1</sup>H NMR (400 MHz, CDCl<sub>3</sub>, HH-COSY, HSQC): δ 4.82 (t, *J* = 3.9 Hz, 1H, H-3), 4.79 (d, *J* = 4.3 Hz, 1H, H-1), 3.95 (ddd, *J* = 8.9, 6.2, 2.4 Hz, 1H, H-5), 3.90 (dt, *J* = 12.0, 4.3 Hz, 1H, H-2), 3.77 (dd, *J* = 11.1, 2.4 Hz, 1H, H-6), 3.62 (dd, *J* = 11.1, 6.2 Hz, 1H, H-6), 3.58 (ddd, *J* = 10.8, 9.3, 3.4 Hz, 1H, H-4), 3.48 (s, 3H, CH<sub>3</sub> OMe), 2.74 (d, *J* = 11.9 Hz, 1H, 2-OH), 2.27 (d, *J* = 10.9 Hz, 1H, 4-OH); <sup>13</sup>C NMR (101 MHz, CDCl<sub>3</sub>, HSQC): δ 99.0 (C-1), 68.2 (C-4), 67.9 (C-5), 67.1 (C-2), 62.9 (C-3), 56.2 (CH<sub>3</sub> OMe), 33.0 (C-6); HRMS: [M+Na]<sup>+</sup> calcd for C<sub>7</sub>H<sub>12</sub>Br<sub>2</sub>O<sub>4</sub>Na 342.8980, found 342.8985.

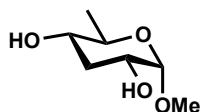

**Methyl 3,6-dideoxy-α-D-allopyranoside (18).** Compound **17** (16.6 g, 52 mmol) was dissolved in dry toluene (580 mL, 0.09 M) under N<sub>2</sub> atmosphere. Bu<sub>3</sub>SnH (37.8 mL, 140 mmol, 2.7 eq.) and AIBN (0.85 g, 5.2 mmol, 0.1 eq.) were added respectively. The solution was refluxed at 120 °C for 17 h, and upon

full conversion, the solution was concentrated *in vacuo*. Flash column chromatography (50:50 → 10:90; pentane:EtOAc) yielded the title compound (8.4 g, 51.5 mmol, 99%) as a colorless oil. TLC:  $R_f$  0.25 (pentane:EtOAc, 4:6, v:v);  $[\alpha]_D^{20}$  39.3° (c 1.0, CHCl<sub>3</sub>); IR (neat, cm<sup>-1</sup>): 1150, 2934, 3385; <sup>1</sup>H NMR (400 MHz, CDCl<sub>3</sub>, HH-COSY, HSQC): δ 4.60 (d,  $J$  = 3.6 Hz, 1H, H-1), 3.71 (dt,  $J$  = 11.8, 4.6 Hz, 1H, H-2), 3.51 (dq,  $J$  = 9.2, 6.3 Hz, 1H, H-5), 3.44 (s, 3H, CH<sub>3</sub> OMe), 3.28 (ddd,  $J$  = 11.1, 9.1, 4.5 Hz, 1H, H-4), 2.19 (dt,  $J$  = 11.6, 4.7 Hz, 1H, H-3), 1.65 (q,  $J$  = 11.4 Hz, 1H, H-3), 1.26 (d,  $J$  = 6.2 Hz, 3H, H-6); <sup>13</sup>C NMR (101 MHz, CDCl<sub>3</sub>, HSQC): δ 98.4 (C-1), 70.8 (C-4), 68.7 (C-5), 67.7 (C-2), 55.2 (CH<sub>3</sub> OMe), 37.0 (C-3), 17.5 (C-6); HRMS:  $[M+Na]^+$  calcd for C<sub>7</sub>H<sub>14</sub>O<sub>4</sub>Na 185.0790, found 185.0790.

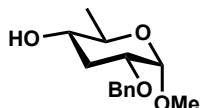

**Methyl 2-O-benzyl-3,6-dideoxy- $\alpha$ -D-allopyranoside (19).** Compound **18** (13.7 g, 84.6 mmol) and tributyltin oxide (86.2 mL, 169 mmol, 2.0 eq.) were dissolved in dry toluene (560 mL, 0.15 M), the solution was refluxed for 20 h under positive N<sub>2</sub> flow in a flask equipped with a Dean-Stark apparatus. The reaction was concentrated *in vacuo* upon which benzyl bromide (60.3 mL, 508 mmol, 6.0 eq.) was added to the residue. The mixture was stirred at 95 °C for 16 h, where after the reaction was cooled to room temperature and purified by flash column chromatography on silica gel. Flash column chromatography (100:0 → 50:50; pentane:EtOAc) yielded the title compound (6.56 g, 26 mmol, 31%) as a colorless oil. TLC:  $R_f$  0.3 (pentane:acetone, 8:2, v:v);  $[\alpha]_D^{20}$  44.5° (c 1.0, CHCl<sub>3</sub>); IR (neat, cm<sup>-1</sup>): 1050, 1090, 1454, 2935; <sup>1</sup>H NMR (400 MHz, CDCl<sub>3</sub>, HH-COSY, HSQC): δ 7.37 – 7.27 (m, 5H, CH<sub>arom</sub>), 4.63 (d,  $J$  = 12.4 Hz, 1H, CHH Bn), 4.61 (d,  $J$  = 3.1 Hz, 1H, H-1), 4.57 (d,  $J$  = 12.4 Hz, 1H, CHH Bn), 3.57 – 3.48 (m, 2H, H-2, H-5), 3.42 (s, 3H, CH<sub>3</sub> OMe), 3.23 (ddd,  $J$  = 11.2, 9.3, 4.6 Hz, 1H, H-4), 2.23 – 2.13 (m, 1H, H-3), 1.81 (q,  $J$  = 11.6 Hz, 1H, H-3), 1.23 (d,  $J$  = 6.2 Hz, 3H, H-6); <sup>13</sup>C NMR (101 MHz, CDCl<sub>3</sub>, HSQC): δ 138.2 (C<sub>q-arom</sub>), 128.6, 128.0, 128.0 (CH<sub>arom</sub>), 97.2 (C-1), 74.0 (C-2), 71.3 (C-4), 71.2 (CH<sub>2</sub> Bn), 68.7 (C-5), 55.0 (CH<sub>3</sub> OMe), 33.7 (C-3), 17.5 (C-6); HRMS:  $[M+Na]^+$  calcd for C<sub>14</sub>H<sub>20</sub>O<sub>4</sub>Na 275.1259, found 275.1254.

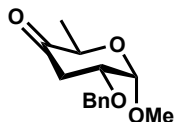

**Methyl 2-O-benzyl-3,6-dideoxy- $\alpha$ -D-erythro-4-ulose (6).** Compound **19** (6.5 g, 26 mmol) was dissolved in DCM (153 mL, 0.17 M) under N<sub>2</sub> atmosphere. Dess-Martin periodinane (16.5 g, 39 mmol, 1.5 eq.) was added and the mixture was stirred for 2.5 h upon the reaction was quenched with water. The aqueous layer was extracted with DCM (3x) followed by washing the combined organic layers with H<sub>2</sub>O, sat. aq. NaHCO<sub>3</sub> and brine, respectively. Subsequently, the organic layer was dried over MgSO<sub>4</sub>, filtered, and concentrated *in vacuo* to yield the crude product as a white oil. Flash column chromatography (95:5 → 90:10; pentane:Et<sub>2</sub>O) yielded the title compound (5.8 g, 23.3 mmol, 90%) as a colorless oil. TLC:  $R_f$  0.7 (pentane:acetone, 8:2, v:v);  $[\alpha]_D^{20}$  73.6° (c 1.0, CHCl<sub>3</sub>); IR (neat, cm<sup>-1</sup>): 1047, 1077, 1454, 1724, 2938; <sup>1</sup>H NMR (400 MHz, CDCl<sub>3</sub>, HH-COSY, HSQC): δ 7.39 – 7.28 (m, 5H, CH<sub>arom</sub>), 4.82 (d,  $J$  = 3.2 Hz, 1H, H-1), 4.65 (d,  $J$  = 12.4 Hz, 1H, CHH Bn), 4.58 (d,  $J$  = 12.3 Hz, 1H, CHH Bn), 4.13 (q,  $J$  = 6.7 Hz, 1H, H-5), 3.83 (ddd,  $J$  = 10.6, 6.4, 3.3 Hz, 1H, H-2), 3.51 (s, 3H, CH<sub>3</sub> OMe), 2.83 – 2.69 (m, 2H, H-3, H-3), 1.26 (d,  $J$  = 6.7 Hz, 3H, H-6); <sup>13</sup>C NMR (101 MHz, CDCl<sub>3</sub>, HSQC): δ 206.1 (C=O), 137.7 (C<sub>q-arom</sub>), 128.7, 128.2, 128.0 (CH<sub>arom</sub>), 97.4 (C-1), 74.4 (C-2), 71.7 (CH<sub>2</sub> Bn), 70.2 (C-5), 56.0 (CH<sub>3</sub> OMe), 41.1 (C-3), 14.6 (C-6); HRMS:  $[M+Na]^+$  calcd for C<sub>14</sub>H<sub>18</sub>O<sub>4</sub>Na 273.1103, found 273.1097.

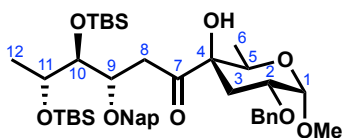

**Methyl 2-O-benzyl-3,6-dideoxy-4-C-([9S,10S,11R]-9-O-[2-methylnaphthalene]-10,11-O-di-tert-butylsilyl-hexan-7-one)- $\alpha$ -D-galactopyranoside (20).** Carboxylic acid **16** (2.66 g, 5.0 mmol) was dissolved in dry THF (50 mL, 0.1 M). This solution was cooled to 0 °C, and while stirring pyridine (604  $\mu$ L, 7.5 mmol, 1.5 eq.), DMF (77  $\mu$ L, 1.0 mmol, 0.2 eq.) and oxalyl chloride (557  $\mu$ L, 6.5 mmol, 1.3 eq.) were added respectively. The solution was stirred for 10 min on ice. The suspension was diluted with pentane and filtered into a flask containing ketone **6** (938.6 mg, 3.75 mmol, 0.75 eq.), resulting in a clear liquid that was concentrated *in vacuo* under N<sub>2</sub> atmosphere to yield the crude acid chloride **5** combined with ketone **6** as a yellow oil. A solution of samarium(II)iodide (175 mL, 17.5 mmol, 3.5 eq. [0.1 M solution in THF, stabilized by samarium chips, Sigma-Aldrich]) was added to a flame dried flask which was under a constant gas flow of nitrogen. The samarium(II)iodide solution was heated to 50 °C followed by the addition of the crude acid chloride **5** and ketone **6** using a cannula. After 10 min the heat source was removed and the solution was quenched with air and diluted with EtOAc, aq. 1.0 M HCl and stirred for 30 min. The aqueous layer was extracted with EtOAc (3x) followed by washing the combined organic layers with sat. aq. Na<sub>2</sub>S<sub>2</sub>O<sub>3</sub>. Subsequently, the organic layer was dried over MgSO<sub>4</sub>, filtered, and concentrated *in vacuo* to yield the crude product as a colorless oil. Flash column chromatography (90:10; pentane:Et<sub>2</sub>O) afforded the title compound (2.21 g, 2.88 mmol, 82% based on **6**) as a colorless oil. TLC: R<sub>f</sub> 0.6 (pentane:acetone, 9:1, v:v);  $[\alpha]_D^{20}$  -10.3° (c 1.0, CHCl<sub>3</sub>); IR (neat, cm<sup>-1</sup>): 777, 811, 1108, 1255, 1472, 1706, 2856, 2929; <sup>1</sup>H NMR (500 MHz, CDCl<sub>3</sub>, HH-COSY, HSQC):  $\delta$  7.84 – 7.18 (m, 12H, CH<sub>arom</sub>), 4.73 (d, *J* = 11.5 Hz, 1H, CHH Bn/Nap), 4.68 (d, *J* = 3.3 Hz, 1H, H-1), 4.56 (d, *J* = 11.5 Hz, 1H, CHH Bn/Nap), 4.48 (d, *J* = 12.4 Hz, 1H, CHH Bn/Nap), 4.39 – 4.35 (m, 1H, H-9), 4.34 (d, *J* = 12.4 Hz, 1H, CHH Bn/Nap), 4.23 (q, *J* = 6.4 Hz, 1H, H-5), 3.89 (s, 1H, 4-OH), 3.83 (ddd, *J* = 11.7, 4.7, 3.3 Hz, 1H, H-2), 3.72 – 3.65 (m, 2H, H-10, H-11), 3.44 (s, 3H, CH<sub>3</sub> OMe), 3.27 (dd, *J* = 16.9, 10.1 Hz, 1H, H-8), 2.43 – 2.35 (m, 2H, H-3, H-8), 1.63 (dd, *J* = 12.4, 4.7 Hz, 1H, H-3), 1.18 (d, *J* = 5.8 Hz, 3H, H-12), 0.96 – 0.88 (m, 21H, H-6, C(CH<sub>3</sub>)<sub>3</sub>, C(CH<sub>3</sub>)<sub>3</sub>), 0.15 – 0.04 (m, 12H, SiCH<sub>3</sub>, SiCH<sub>3</sub>, SiCH<sub>3</sub>, SiCH<sub>3</sub>); <sup>13</sup>C NMR (126 MHz, CDCl<sub>3</sub>, HSQC):  $\delta$  210.2 (C-7), 138.3, 135.8, 133.4, 133.0 (C<sub>q-arom</sub>), 128.5, 128.1, 128.0, 127.9, 127.8, 126.3, 126.1, 125.9 (CH<sub>arom</sub>), 98.1 (C-1), 81.1 (C-4), 78.1 (C-10/C-11), 77.2 (C-9), 72.8 (CH<sub>2</sub> Bn/Nap), 71.6 (C-2), 71.0 (CH<sub>2</sub> Bn/Nap), 70.1 (C-11/C-10), 65.2 (C-5), 55.4 (CH<sub>3</sub> OMe), 38.2 (C-8), 32.9 (C-3), 26.2, 26.0 (C(CH<sub>3</sub>)<sub>3</sub>), 20.8 (C-12), 18.5, 18.2 (C(CH<sub>3</sub>)<sub>3</sub>), 14.4 (C-6), -3.8, -4.0, -4.3, -4.6 (SiCH<sub>3</sub>); HRMS: [M+Na]<sup>+</sup> calcd for C<sub>43</sub>H<sub>66</sub>O<sub>8</sub>Si<sub>2</sub>Na 789.4194, found 789.4188.

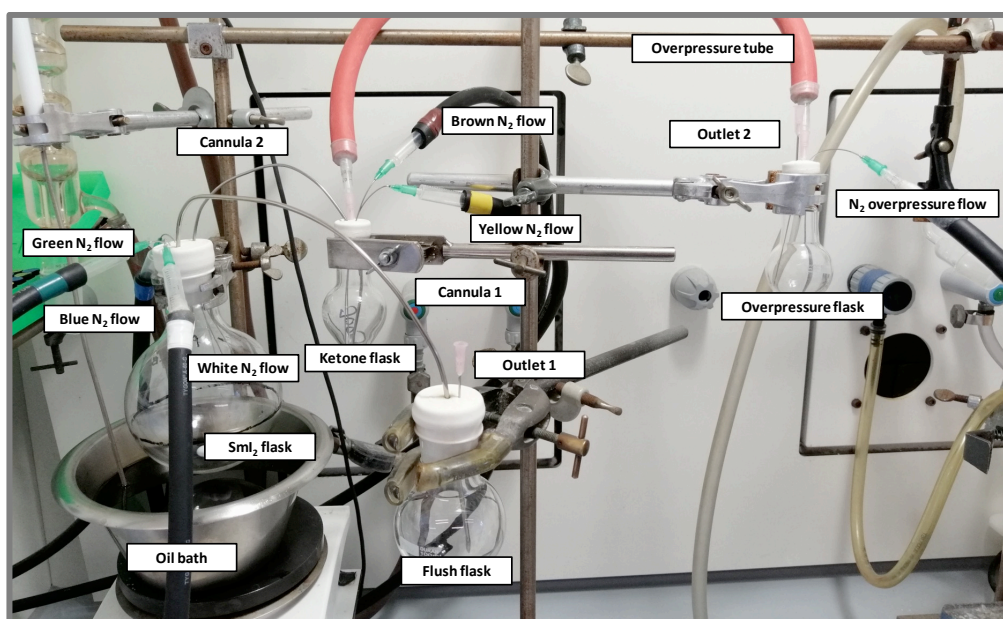

**Figure S10.** General setup of the SmI<sub>2</sub>-promoted C-C bond coupling.

### Extra experimental details

Due to the direct oxidation of Sm(II) to the unreactive and more stable Sm(III) in the presence of oxygen, the C-C couplings have to be executed with great care and under completely inert conditions. The experimental setup can be found in Figure S8. The general procedure employed in the C-C couplings was as follows: Both the ketone flask and the SmI<sub>2</sub> flask seen in Figure S8 were flame dried, subsequently, the entire setup was flushed with N<sub>2</sub> (30 mbar overpressure) for 18 h. Then, pyranulose **6** was co-evaporated with toluene under N<sub>2</sub> atmosphere in a flame dried flask. Using an N<sub>2</sub> flushed syringe, the ketone was transferred to the ketone flask in THF. Subsequently, the acid chloride (1.33 eq.) was added to the ketone flask and N<sub>2</sub> was bubbled through the solution of ketone and acid chloride for 30 min through cannula 2 by closing the yellow, brown and overpressure N<sub>2</sub> flow and removing outlet 1. Simultaneously, SmI<sub>2</sub> (3.0 eq.) was added to the SmI<sub>2</sub> flask by transferring the flush flask side of cannula 1 and the green and white N<sub>2</sub> flow to a 0.1 M solution SmI<sub>2</sub> in THF, and closing the blue N<sub>2</sub> flow (Figure S9). Once the necessary amount of SmI<sub>2</sub> was transferred to the SmI<sub>2</sub> flask, cannula 1 was transferred from the 0.1 M solution SmI<sub>2</sub> in THF to the flush flask and the green and white N<sub>2</sub> flow tubes were transferred back to the SmI<sub>2</sub> flask. The SmI<sub>2</sub> flask was then heated to 50 °C using the oil bath. Once the SmI<sub>2</sub> flask reached a temperature of 50 °C, the solution of ketone and acid chloride was added to the SmI<sub>2</sub> flask through cannula 2 over a time span of approximately 10 seconds by removing outlet 2 and installing outlet 1, opening the yellow, brown and overpressure N<sub>2</sub> flows, and closing the green and white N<sub>2</sub> flows. After 15 min, the positive nitrogen flow was removed and a 1 M aq. HCl solution and EtOAc were added, followed by standard workup procedures.

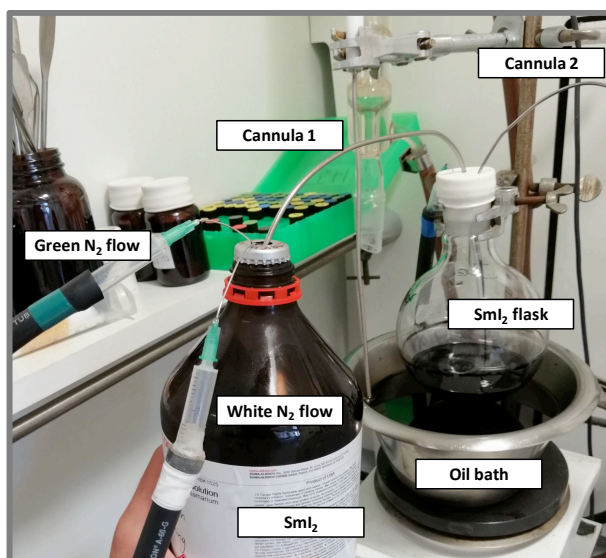

**Figure S11.** General setup for the addition of SmI<sub>2</sub> to the SmI<sub>2</sub> flask needed for the SmI<sub>2</sub>-promoted C-C bond coupling.

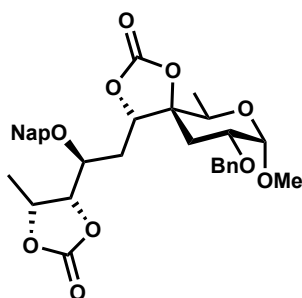

**Methyl 2-O-benzyl-9-O-(2-methylnaphthalene)-10,11-di-O-*tert*-butyldimethylsilyl- $\alpha$ -D-caryophyllide (21).** A Zn(BH<sub>4</sub>)<sub>2</sub> solution was prepared by dissolving anhydrous ZnCl<sub>2</sub> (12.1 g, 88.5 mmol, 4.2 eq.) in dry THF (177 mL, 0.5 M), at 0 °C NaBH<sub>4</sub> (8.4 g, 221.3 mmol, 10.5 eq.) was added and the solution

was stirred for 1 h. **20** (16.2 g, 21.1 mmol, 1.0 eq.) was dissolved in dry THF (422 mL, 0.05 M) after which it was cooled on ice, the Zn(BH<sub>4</sub>)<sub>2</sub> solution was added. The solution was allowed to warm to room temperature and stirred for 16 h. The reaction was quenched with sat. aq. NH<sub>4</sub>Cl and diluted with EtOAc and brine, the aqueous layer was extracted with EtOAc (3x) followed by washing the combined organic layers with H<sub>2</sub>O, sat. aq. NaHCO<sub>3</sub> and brine, respectively. Subsequently, the organic layer was dried over MgSO<sub>4</sub>, filtered, and concentrated *in vacuo* to yield the crude products as an inseparable mixture. The mixture (14.9 g, 19.3 mmol, 1.0 eq.) was dissolved in methanol (568 mL, 0.034 M), a 6 M HCl aq. solution (32 mL, 10 eq.) was added and the mixture was stirred for 18 h upon which the reaction was quenched by neutralizing the acid with NaOMe. The reaction mixture was concentrated *in vacuo* to yield the crude products as an inseparable mixture. The mixture (8.4 g, 15.5 mmol) was dissolved in DCM (310 mL, 0.05 M) and CDI (7.6 g, 46.6 mmol, 3 eq.) was added. The resulting mixture was refluxed for 24 h. Upon full conversion, the reaction mixture was concentrated *in vacuo*. Flash column chromatography (90:10 → 40:60; pentane:EtOAc) afforded the title compound (7.2 g, 12.2 mmol, 58% over 3 steps) as a white foam. TLC: R<sub>f</sub> 0.7 (pentane:EtOAc, 4:6, v:v); [α]<sub>D</sub><sup>20</sup> 149.0° (c 1.0, CHCl<sub>3</sub>); IR (neat, cm<sup>-1</sup>): 1056, 1121, 1800; <sup>1</sup>H NMR (500 MHz, CDCl<sub>3</sub>, HH-COSY, HSQC): δ 7.94 – 7.28 (m, 12H, CH<sub>arom</sub>), 4.92 (p, *J* = 6.7 Hz, 1H, H-11), 4.79 (s, 2H, CH<sub>2</sub> Bn/Nap), 4.67 – 4.62 (m, 2H, H-1, H-10), 4.57 (d, *J* = 12.1 Hz, 1H, CHH Bn/Nap), 4.49 (d, *J* = 12.1 Hz, 1H, CHH Bn/Nap), 4.33 (dd, *J* = 11.4, 1.8 Hz, 1H, H-7), 4.03 (ddd, *J* = 9.5, 6.7, 3.1 Hz, 1H, H-9), 3.86 (q, *J* = 6.3 Hz, 1H, H-5), 3.75 (ddd, *J* = 11.7, 4.9, 3.5 Hz, 1H, H-2), 3.42 (s, 3H, CH<sub>3</sub> OMe), 2.12 (ddd, *J* = 14.7, 11.5, 3.1 Hz, 1H, H-8), 2.03 (dd, *J* = 13.4, 11.8 Hz, 1H, H-3), 1.95 (ddd, *J* = 14.9, 8.6, 1.9 Hz, 1H, H-8), 1.83 (dd, *J* = 13.5, 4.9 Hz, 1H, H-3), 1.46 (d, *J* = 6.7 Hz, 3H, H-12), 1.24 (d, *J* = 6.3 Hz, 3H, H-6); <sup>13</sup>C NMR (126 MHz, CDCl<sub>3</sub>, HSQC): δ 153.6, 153.5 (O(C=O)O), 137.8, 134.2, 133.3, 133.3 (C<sub>q-arom</sub>), 128.9, 128.7, 128.2, 128.1, 128.0, 127.9, 126.8, 126.8, 126.6, 125.4 (CH<sub>arom</sub>), 96.9 (C-1), 84.8 (C-4), 81.0 (C-7), 79.0 (C-10), 75.8 (C-11), 73.9 (C-9), 73.7, 71.7 (CH<sub>2</sub> Bn/Nap), 71.4 (C-2), 64.7 (C-5), 55.9 (CH<sub>3</sub> OMe), 33.6 (C-3), 29.8 (C-8), 15.3 (C-12), 15.0 (C-6); HRMS: [M+Na]<sup>+</sup> calcd for C<sub>33</sub>H<sub>36</sub>O<sub>10</sub>Na 615.2206, found 615.2215.

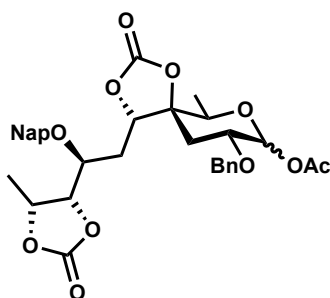

**Acetyl 2-O-benzyl-4,7,10,11-di-O-carbonate-9-O-(2-methylnaphthalene)-D-caryophylloside (22).** Compound **21** (6.4 g, 10.8 mmol) was dissolved in Ac<sub>2</sub>O (216 mL, 0.05 M) and cooled on ice. H<sub>2</sub>SO<sub>4</sub> (1.15 mL, 21.6 mmol, 2.0 eq.) was dissolved in Ac<sub>2</sub>O (10 mL) and dropwise added to the solution of compound **21**. After stirring the solution for exactly 80 sec, the reaction mixture was poured into a mixture of sat. aq. NaHCO<sub>3</sub> and ice, and stirred for another 15 min. The aqueous layer was extracted twice with EtOAc followed by washing the combined organic layers with H<sub>2</sub>O, sat. aq. NaHCO<sub>3</sub> and brine, respectively. Subsequently, the organic layer was dried over MgSO<sub>4</sub>, filtered, and concentrated *in vacuo* to yield the crude product. Flash column chromatography (70:30 → 50:50; pentane:EtOAc) yielded the title compound (6.3 g, 10.2 mmol, 94%, α:β; 63:37) as a white foam. TLC: R<sub>f</sub> 0.2 (pentane:EtOAc, 7:3, v:v); IR (neat, cm<sup>-1</sup>): 752, 1054, 1086, 1200, 1229, 1751, 1797; Data of the major stereoisomer (α-anomer): <sup>1</sup>H NMR (400 MHz, CDCl<sub>3</sub>, HH-COSY, HSQC): δ 8.22 – 6.97 (m, 12H, CH<sub>arom</sub>), 6.34 (d, *J* = 3.0 Hz, 1H, H-1), 4.95 (p, *J* = 6.9 Hz, 1H, H-11), 4.88 – 4.41 (m, 6H, H-7, H-10, CH<sub>2</sub> Bn/Nap, CH<sub>2</sub> Bn/Nap), 4.11 – 3.85 (m, 3H, H-2, H-5, H-9), 2.20 (s, 3H, CH<sub>3</sub> OAc), 2.16 – 1.96 (m, 4H, H-3, H-3, H-8, H-8), 1.48 (d, *J* = 6.6 Hz, 3H, H-12), 1.29 (d, *J* = 6.2 Hz, 3H, H-6); <sup>13</sup>C NMR (101 MHz, CDCl<sub>3</sub>, HSQC): δ 169.5 (C=O Ac), 153.6, 153.2(O(C=O)O), 137.3, 134.2, 134.0, 133.2 (C<sub>q-arom</sub>), 128.8, 128.7, 128.7, 128.6, 127.9, 127.9, 127.7, 127.0, 126.7, 126.7, 125.6, 125.6 (CH<sub>arom</sub>), 88.4 (C-1), 84.2 (C-4), 80.8 (C-7), 78.5 (C-10), 75.8 (C-11), 73.5 (C-9), 73.4, 71.8 (CH<sub>2</sub> Bn/Nap), 70.2 (C-2), 67.3 (C-5), 33.8 (C-3), 29.2 (C-8), 21.2 (CH<sub>3</sub> Ac), 15.1 (C-12), 15.0 (C-6); Diagnostic signals of the minor stereoisomer (β-isomer):

$^1\text{H}$  NMR (400 MHz,  $\text{CDCl}_3$ , HH-COSY, HSQC):  $\delta$  5.65 (d,  $J = 6.5$  Hz, 1H, H-1), 2.13 (s, 3H,  $\text{CH}_3$  Ac), 1.35 (d,  $J = 6.4$  Hz, 3H, H-6);  $^{13}\text{C}$  NMR (101 MHz,  $\text{CDCl}_3$ , HSQC):  $\delta$  169.4 (C=O Ac), 153.7, 153.0 (O(C=O)O), 93.8 (C-1), 83.2 (C-4), 36.5 (C-3), 29.5 (C-8), 21.2 ( $\text{CH}_3$  OAc), 15.8 (C-12), 15.2 (C-6); HRMS:  $[\text{M}+\text{Na}]^+$  calcd for  $\text{C}_{34}\text{H}_{36}\text{O}_{11}\text{Na}$  643.2155, found 643.2164.

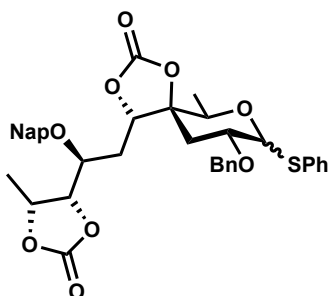

**Phenyl 2-O-benzyl-4,7,10,11-di-O-carbonate-9-O-(2-methylnaphthalene)-1-thio-D-caryophylloside (4).** Compound **22** (6.3 g, 10.15 mmol) was dissolved in DCM (101.5 mL, 0.1 M) and thiophenol (1.14 mL, 11.16 mmol, 1.1 eq.). Subsequently, the reaction mixture was cooled to  $-80$  °C followed by the dropwise addition of  $\text{BF}_3 \cdot \text{OEt}_2$  (1.5 mL, 12.18 mmol, 1.2 eq.) and allowed to warm to room temperature overnight. Upon full conversion, sat. aq.  $\text{NaHCO}_3$  and EtOAc were added. The aqueous layer was extracted twice with EtOAc followed by washing the combined organic layers with  $\text{H}_2\text{O}$ , sat. aq.  $\text{NaHCO}_3$  and brine, respectively. Subsequently, the organic layer was dried over  $\text{MgSO}_4$ , filtered, and concentrated *in vacuo* to yield the crude product. Flash column chromatography (80:20  $\rightarrow$  70:30; pentane:EtOAc) yielded the title compound (4.2 g, 6.2 mmol, 61%,  $\alpha$ : $\beta$ ; 49:51) as a white foam. TLC:  $R_f$  0.7 (pentane:EtOAc, 6:4, v:v); IR (neat,  $\text{cm}^{-1}$ ): 746, 1014, 1027, 1801; Data of the major stereoisomer ( $\beta$ -anomer):  $^1\text{H}$  NMR (500 MHz,  $\text{CDCl}_3$ , HH-COSY, HSQC):  $\delta$  8.17 – 6.95 (m, 12H,  $\text{CH}_{\text{arom}}$ ), 4.94 – 4.85 (m, 1H, H-11), 4.67 – 4.60 (m, 3H,  $\text{CHH}$  Bn/Nap,  $\text{CHH}$  Bn/Nap, H-10), 4.58 (d,  $J = 9.0$  Hz, 1H, H-1), 4.52 – 4.44 (m, 2H,  $\text{CHH}$  Bn/Nap,  $\text{CHH}$  Bn/Nap), 4.11 – 3.97 (m, 2H, H-7, H-9), 3.70 – 3.55 (m, 2H, H-2, H-5), 2.21 – 2.10 (m, 1H, H-3), 2.10 – 2.02 (m, 1H, H-8), 1.98 – 1.88 (m, 2H, H-3, H-8), 1.44 (d,  $J = 6.7$  Hz, 3H, H-12), 1.33 (d,  $J = 6.1$  Hz, 3H, H-6);  $^{13}\text{C}$  NMR (126 MHz,  $\text{CDCl}_3$ , HSQC):  $\delta$  153.6, 153.2 (O(C=O)O), 137.6, 137.2, 134.1, 133.3 ( $\text{C}_{\text{q-arom}}$ ), 132.5, 131.5, 129.1, 128.6, 128.1, 127.9, 127.5, 127.0, 126.8, 126.7, 125.6, 125.5 ( $\text{CH}_{\text{arom}}$ ), 88.5 (C-1), 84.2 (C-4), 78.7 (C-10), 75.7 (C-11), 74.9 (C-2/C-5), 74.0 (C-7/C-9), 73.9 (C-7/C-9), 72.9 ( $\text{CH}_2$  Bn/Nap), 72.5 (C-2/C-5), 71.5 ( $\text{CH}_2$  Bn/Nap), 39.5 (C-3), 29.4 (C-8), 15.7 (C-6), 15.2 (C-12); Diagnostic signals of the minor stereoisomer ( $\alpha$ -isomer):  $^1\text{H}$  NMR (500 MHz,  $\text{CDCl}_3$ , HH-COSY, HSQC):  $\delta$  5.62 (d,  $J = 4.8$  Hz, 1H, H-1), 1.71 (dd,  $J = 14.1, 10.3$  Hz, 1H, H-3), 1.46 (d,  $J = 6.6$  Hz, 3H, H-12), 1.24 (d,  $J = 6.3$  Hz, 3H, H-6);  $^{13}\text{C}$  NMR (126 MHz,  $\text{CDCl}_3$ , HSQC):  $\delta$  153.6, 153.3 (O(C=O)O), 86.5 (C-1), 84.3 (C-4), 73.8, 73.7 ( $\text{CH}_2$  Bn/Nap), 35.7 (C-3), 29.9 (C-8), 15.4 (C-6), 14.9 (C-12); HRMS:  $[\text{M}+\text{Na}]^+$  calcd for  $\text{C}_{38}\text{H}_{38}\text{O}_9\text{SNa}$  693.2134, found 693.2145.



## Synthesis of compound 3

**Scheme S1.** Synthesis of 4,6-dideoxy-4-galactosazide donor **3**.

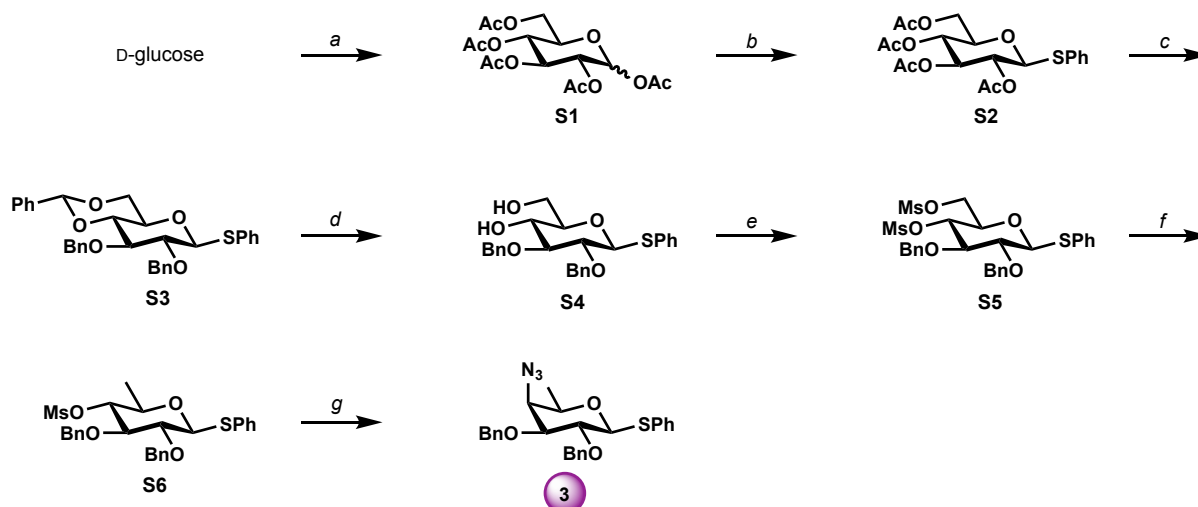

**Reagents and conditions:** a)  $\text{Ac}_2\text{O}$ ,  $\text{NaOAc}$ , reflux (75%); b)  $\text{PhSH}$ ,  $\text{BF}_3 \cdot \text{OEt}_2$ ,  $\text{DCM}$  (72%); c) *i.*  $\text{NaOMe}$ ,  $\text{MeOH}$ ; *ii.*  $\text{PhCH}(\text{OMe})_2$ ,  $p\text{TsOH}$ ,  $50\text{ }^\circ\text{C}$ ; *iii.*  $\text{NaH}$ ,  $\text{BnBr}$ ,  $\text{DMF}$  (91% over 3 steps); d)  $\text{CSA}$ ,  $\text{MeOH}$  (71%); e)  $\text{MsCl}$ ,  $\text{pyridine}$  (95%); f)  $\text{NaBH}_4$ ,  $\text{DMSO}$ ,  $85\text{ }^\circ\text{C}$  (67%); g)  $\text{NaN}_3$ , 1,3-dimethyl-3,4,5,6-tetrahydro-2-(*H*)-pyrimidone,  $125\text{ }^\circ\text{C}$  (62%).

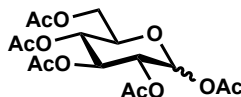

**1,2,3,4,6-Penta-O-acetyl-D-glucopyranoside (S1).** Sodium acetate (8.2 g, 100 mmol, 0.5 eq.) was dissolved in acetic anhydride (190 mL, 2.0 mol, 10 eq.) and heated to  $140\text{ }^\circ\text{C}$ . D-glucose (36.0 g, 200 mmol) was added portion-wise after which the solution was stirred another 15 min at  $140\text{ }^\circ\text{C}$ . After the solution had attained room temperature it was poured into a beaker containing ice water. The white precipitate formed on the bottom was collected and dissolved in  $\text{DCM}$ . The organic layer was washed with water (2x) followed by washing with a sat. aq. brine solution. The organic layer was dried over  $\text{MgSO}_4$ , filtered, and concentrated *in vacuo* to yield a white crystalline solid. Recrystallized from hot  $\text{EtOH}$  yielded the title compound (58.3 g, 149 mmol, 75%,  $\alpha:\beta$ ; 8:92) as a white fluffy solid. TLC:  $R_f$  0.5 (pentane:EtOAc, 9:1, v:v); IR (neat,  $\text{cm}^{-1}$ ): 1036, 1075, 1213, 1367, 1750; Data of the major stereoisomer ( $\beta$ -anomer):  $^1\text{H NMR}$  (500 MHz,  $\text{CDCl}_3$ , HH-COSY, HSQC):  $\delta$  5.70 (d,  $J = 8.3\text{ Hz}$ , 1H, H-1), 5.23 (t,  $J = 9.4\text{ Hz}$ , 1H, H-3), 5.16 – 5.01 (m, 2H, H-2, H-4), 4.27 (dd,  $J = 12.5, 4.5\text{ Hz}$ , 1H, H-6), 4.09 (dd,  $J = 12.5, 2.2\text{ Hz}$ , 1H, H-6), 3.82 (ddd,  $J = 10.1, 4.5, 2.2\text{ Hz}$ , 1H, H-5), 2.23 – 1.76 (m, 15H,  $\text{COCH}_3$ );  $^{13}\text{C NMR}$  (101 MHz,  $\text{CDCl}_3$ , HSQC):  $\delta$  170.7, 170.2, 169.5, 169.3, 169.0 ( $\text{COCH}_3$ ), 91.8 (C-1), 72.9 (C-3), 72.8 (C-5), 70.3 (C-4/C-2), 67.9 (C-4/C-2), 61.6 (C-6), 20.9, 20.8, 20.7, 20.6, 20.5 ( $\text{COCH}_3$ ); Diagnostic signals of the minor stereoisomer ( $\alpha$ -anomer):  $\delta$  6.31 (d,  $J = 3.7\text{ Hz}$ , 1H, H-1), 5.55 – 5.35 (t,  $J = 9.9\text{ Hz}$ , 1H, 1H, H-3);  $^{13}\text{C NMR}$  (101 MHz,  $\text{CDCl}_3$ , HSQC):  $\delta$  170.3, 169.7, 168.8 ( $\text{COCH}_3$ ), 89.2 (C-1), 69.9 (C-4), 69.3 (C-2), 68.0 (C-6), 21.0, 20.8 ( $\text{CO}_2\text{CH}_3$ ); HRMS:  $[\text{M}+\text{Na}]^+$  calcd for  $\text{C}_{16}\text{H}_{22}\text{O}_{11}\text{Na}$  413.1060, found 413.1054.

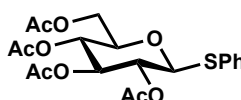

**Phenyl 2,3,4,6-tetra-O-acetyl-1-thio- $\beta$ -D-glucopyranoside (S2).** Compound **S1** (58.3 g, 149 mmol) was dissolved in  $\text{DCM}$  (0.5 M, 300 mL) and cooled on ice. While stirring,  $\text{BF}_3 \cdot \text{OEt}_2$  (27.3 mL, 223 mmol, 1.5 eq.) and thiophenol (22.9 mL, 223 mmol, 1.5 eq.) were added and consequently refluxed for 16 h. After cooling to room temperature, the solution was diluted with sat. aq.  $\text{NaHCO}_3$  and  $\text{Et}_2\text{O}$ . The aqueous

layer was extracted with Et<sub>2</sub>O followed by washing the combined organic layers with H<sub>2</sub>O, sat. aq. NaHCO<sub>3</sub> and brine, respectively. Subsequently, the organic layer was dried over MgSO<sub>4</sub>, filtered, and concentrated *in vacuo* to yield the crude product as a white crystalline solid. Recrystallization from EtOAc/pentane yielded the title compound (44.9 g, 106 mmol, 72%) as a white fluffy solid. TLC: R<sub>f</sub> 0.6 (pentane:EtOAc, 9:1, v:v); [α]<sub>D</sub><sup>20</sup> -10.4° (c 1.0, CHCl<sub>3</sub>); IR (neat, cm<sup>-1</sup>): 1038, 1220, 1367, 1749; <sup>1</sup>H NMR (500 MHz, CDCl<sub>3</sub>, HH-COSY, HSQC): δ 7.53 – 7.44 (m, 2H, CH<sub>arom</sub>), 7.32 (m, 3H, CH<sub>arom</sub>), 5.22 (t, *J* = 9.4 Hz, 1H, H-3), 5.04 (t, *J* = 9.8 Hz, 1H, H-4), 4.97 (t, *J* = 9.7 Hz, 1H, H-2), 4.70 (d, *J* = 10.1 Hz, 1H, H-1), 4.20 (qd, *J* = 12.3, 3.8 Hz, 2H, H-6), 3.72 (ddd, *J* = 10.1, 5.1, 2.5 Hz, 1H, H-5), 2.10 – 1.97 (m, 12H, COCH<sub>3</sub>); <sup>13</sup>C NMR (126 MHz, CDCl<sub>3</sub>, HSQC): δ 170.7, 170.3, 169.5, 169.4 (COCH<sub>3</sub>), 133.2 (CH<sub>arom</sub>), 131.8 (C<sub>q-arom</sub>), 129.1, 128.5 (CH<sub>arom</sub>), 85.9 (C-1), 75.9 (C-5), 74.1 (C-3), 70.1 (C-2), 68.3 (C-4), 62.3 (C-6), 20.9, 20.9, 20.7, 20.7 (COCH<sub>3</sub>); HRMS: [M+Na]<sup>+</sup> calcd for C<sub>20</sub>H<sub>24</sub>O<sub>9</sub>SNa 463.1039, found 463.1035.

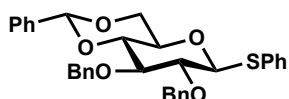

**Phenyl 2,3-di-O-benzyl-4,6-O-benzylidene-1-thio-β-D-glucopyranoside (S3).** Compound **S2** (44.9 g, 106 mmol) was dissolved in MeOH (0.2 M, 530 mL) followed by the addition of NaOMe (0.6 g, 10.6 mmol, 0.1 eq.). The solution was stirred for 18 h upon which the reaction was neutralized with amberlite H<sup>+</sup> (Sigma Aldrich Amberlite IR120 H<sup>+</sup> form, pre-washed with MeOH) and filtered over Celite® Hyflo Supercel (Merck). The methanol was removed under reduced pressure to yield the crude product **27** as a colorless oil. TLC: R<sub>f</sub> 0.6 (EtOH:EtOAc, 1:2, v:v). The crude product **27** was then dissolved in DMF (56 mL) and CH<sub>3</sub>CN (225 mL) followed by the addition of PhCH(OMe)<sub>2</sub> (22.3 mL, 148 mmol, 1.4 eq.) and *p*TsOH (1.0 g, 5.3 mmol, 0.05 eq.). After stirring for 5 h at 50 °C the reaction was quenched with solid NaHCO<sub>3</sub> (1.0 g). The solution was concentrated under reduced pressure to a fifth of its original volume and consequently diluted with EtOAc and water. The aqueous layer was extracted with Et<sub>2</sub>O followed by washing the combined organic layers with H<sub>2</sub>O, sat. aq. NaHCO<sub>3</sub> and brine, respectively. Subsequently, the organic layer was dried over MgSO<sub>4</sub>, filtered, and concentrated *in vacuo* to yield the crude product as a brown oil. TLC: R<sub>f</sub> 0.9 (EtOH:EtOAc, 1:2, v:v). The crude product was dissolved in DMF (0.3M, 350 mL) and cooled on ice. NaH (21.4 g, 530 mmol, 5.0 eq., 60% in mineral oil) was added followed by the portion-wise addition of BnBr (50.4 mL, 424 mmol, 4.0 eq.). The reaction mixture was allowed to reach room temperature and was stirred vigorously for 18 h. The reaction was quenched with water upon which the solution was diluted with EtOAc and water. The aqueous layer was extracted with EtOAc followed by washing the combined organic layers with H<sub>2</sub>O, sat. aq. NaHCO<sub>3</sub> and brine, respectively. Subsequently, the organic layer was dried over MgSO<sub>4</sub>, filtered, and concentrated *in vacuo* to yield the crude product as a yellow solid. Recrystallization from EtOAc/pentane yielded the title compound (52.0 g, 96.3 mmol, 91% over 3 steps) as a white crystalline solid. TLC: R<sub>f</sub> 0.6 (pentane:EtOAc, 9:1, v:v); [α]<sub>D</sub><sup>20</sup> -19.7° (c 1.0, CHCl<sub>3</sub>); IR (neat, cm<sup>-1</sup>): 697, 747, 1028, 1092, 2872; <sup>1</sup>H NMR (400 MHz, CDCl<sub>3</sub>, HH-COSY, HSQC): δ 7.65 – 7.28 (m, 20H, CH<sub>arom</sub>), 5.60 (s, 1H, CHPh), 4.95 (d, *J* = 11.1 Hz, 1H, CHH Bn), 4.87 (d, *J* = 10.2 Hz, 1H, CHH Bn), 4.82 (d, *J* = 10.3 Hz, 1H, CHH Bn), 4.79 (d, *J* = 9.9 Hz, 1H, CHH Bn), 4.77 (d, *J* = 8.6 Hz, 1H, H-1), 4.40 (dd, *J* = 10.5, 5.0 Hz, 1H, H-6), 3.88 – 3.78 (m, 2H, H-6, H-3), 3.72 (t, *J* = 9.4 Hz, 1H, H-4), 3.52 (dd, *J* = 9.8, 8.3 Hz, 1H, H-2), 3.48 (dq, *J* = 9.8, 5.1 Hz, 1H, H-5); <sup>13</sup>C NMR (101 MHz, CDCl<sub>3</sub>, HSQC): δ 138.4, 138.1, 137.3, 133.2 (C<sub>q-arom</sub>), 132.5, 129.2, 129.1, 128.5, 128.5, 128.4, 128.4, 128.3, 128.0, 128.0, 127.9, 126.1 (CH<sub>arom</sub>), 101.2 (CHPh), 88.4 (C-1), 83.1 (C-3), 81.6 (C-4), 80.5 (C-2), 76.0, 75.5 (CH<sub>2</sub> Bn), 70.4 (C-5), 68.8 (C-6); HRMS: [M+Na]<sup>+</sup> calcd for C<sub>33</sub>H<sub>32</sub>O<sub>5</sub>SNa 563.1868, found.

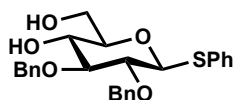

**Phenyl 2,3-di-O-benzyl-1-thio-β-D-glucopyranoside (S4).** Compound **S3** (10.8 g, 20 mmol) was dissolved in MeOH (0.1 M, 200 mL), CSA (2.3 g, 10 mmol, 0.5 eq.) was added and the solution was stirred for 18 h at room temperature. Upon full conversion, solid NaHCO<sub>3</sub> was added and the solution was concentrated under reduced pressure to a fifth of its original volume upon which the mixture was

diluted with EtOAc and water. The aqueous layer was extracted with EtOAc followed by washing the combined organic layers with H<sub>2</sub>O, sat. aq. NaHCO<sub>3</sub> and brine, respectively. Subsequently, the organic layer was dried over MgSO<sub>4</sub>, filtered, and concentrated *in vacuo* to yield the crude product as a colorless solid. Flash column chromatography (75:25 → 50:50; pentane:EtOAc) yielded the title compound (6.36 g, 14.1 mmol, 71%) as a colorless oil. TLC: R<sub>f</sub> 0.3 (pentane:EtOAc, 1:1, v:v); [α]<sub>D</sub><sup>20</sup> -30.8° (c 1.0, CHCl<sub>3</sub>); IR (neat, cm<sup>-1</sup>): 695, 739, 1027, 1058, 1124, 2941, 3410; <sup>1</sup>H NMR (500 MHz, CDCl<sub>3</sub>, HH-COSY, HSQC): δ 7.55 – 7.28 (m, 15H, CH<sub>arom</sub>), 4.98 (m, 1H, CHH Bn), 4.95 (m, 1H, CHH Bn), 4.76 (d, *J* = 10.3 Hz, 1H, CHH Bn), 4.73 (d, *J* = 9.4 Hz, 1H, H-1), 4.71 (d, *J* = 11.5 Hz, 1H, CHH Bn), 3.88 (ddd, *J* = 11.8, 6.7, 3.5 Hz, 1H, H-6), 3.75 (ddd, *J* = 12.1, 6.8, 5.5 Hz, 1H, H-6), 3.58 (td, *J* = 9.1, 2.5 Hz, 1H, H-5), 3.56 – 3.47 (m, 2H, H-2, H-3), 3.38 – 3.33 (m, 1H, H-5), 2.20 (d, *J* = 2.6 Hz, 1H, 4-OH), 1.98 (t, *J* = 6.7 Hz, 1H, 6-OH); <sup>13</sup>C NMR (126 MHz, CDCl<sub>3</sub>, HSQC): δ 138.4, 137.9, 133.6 (C<sub>q-arom</sub>), 131.9, 129.2, 128.9, 128.6, 128.4, 128.3, 128.2, 128.1, 127.9 (CH<sub>arom</sub>), 87.9 (C-1), 86.2 (C-3), 81.1 (C-2), 79.2 (C-5), 75.6, 75.6 (CH<sub>2</sub> Bn), 70.6 (C-4), 63.0 (C-6); HRMS: [M+Na]<sup>+</sup> calcd for C<sub>26</sub>H<sub>28</sub>O<sub>5</sub>SNa 475.1555, found 475.1548.

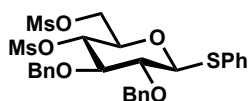

**Phenyl 2,3-di-O-benzyl-4,6-di-O-methylsulfonyl-1-thio-β-D-glucopyranoside (S5).** Compound **S4** (5.7 g, 12.7 mmol) was dissolved in pyridine (42 mL, 0.3 M) and cooled on ice. MsCl (3.9 mL, 50.8 mmol, 4.0 eq.) was added dropwise while stirring vigorously. The mixture was stirred for 2 h while attaining room temperature. Upon full conversion, the mixture was slowly poured on ice and EtOAc was added. The aqueous layer was extracted with EtOAc followed by washing the combined organic layers with H<sub>2</sub>O, sat. aq. NaHCO<sub>3</sub> and brine, respectively. Subsequently, the organic layer was dried over MgSO<sub>4</sub>, filtered, and concentrated *in vacuo* to yield the crude product as a yellow oil. Flash column chromatography (75:25 → 60:40; pentane:EtOAc) yielded the title compound (7.3 g, 12.0 mmol, 95%) as a colorless oil. TLC: R<sub>f</sub> 0.5 (pentane:EtOAc, 2:1, v:v); [α]<sub>D</sub><sup>20</sup> 13.2° (c 1.0, CHCl<sub>3</sub>); IR (neat, cm<sup>-1</sup>): 699, 750, 817, 957, 996, 1175, 1356; <sup>1</sup>H NMR (400 MHz, CDCl<sub>3</sub>, HH-COSY, HSQC): δ 7.60 – 7.53 (m, 2H, CH<sub>arom</sub>), 7.41 – 7.27 (m, 13H, CH<sub>arom</sub>), 4.99 (m, 2H, CHH Bn, CHH Bn), 4.77 – 4.66 (m, 3H, CHH Bn, CHH Bn, H-1), 4.57 (dd, *J* = 11.5, 2.4 Hz, 1H, H-6), 4.52 (t, *J* = 9.6 Hz, 1H, H-4), 4.38 (dd, *J* = 11.5, 5.8 Hz, 1H, H-6), 3.79 – 3.72 (m, 2H, H-5, H-3), 3.58 (dd, *J* = 9.7, 8.8 Hz, 1H, H-2), 3.02 (s, 3H, SO<sub>2</sub>CH<sub>3</sub>), 2.83 (s, 3H, SO<sub>2</sub>CH<sub>3</sub>); <sup>13</sup>C NMR (126 MHz, CDCl<sub>3</sub>, HSQC): δ 137.4, 137.3, 132.6 (C<sub>q-arom</sub>), 132.5, 129.4, 128.7, 128.7, 128.4, 128.4, 128.3, 128.2, 127.6 (CH<sub>arom</sub>), 87.8 (C-1), 83.2 (C-3), 81.1 (C-2), 76.8 (C-4), 75.9 (C-5), 75.7, 75.6 (CH<sub>2</sub> Bn), 68.0 (C-6), 38.7 (SO<sub>2</sub>CH<sub>3</sub>), 37.8 (SO<sub>2</sub>CH<sub>3</sub>); HRMS: [M+Na]<sup>+</sup> calcd for C<sub>28</sub>H<sub>32</sub>O<sub>9</sub>S<sub>3</sub>Na 631.1106, found 631.1108.

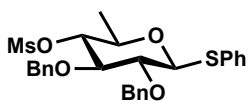

**Phenyl 2,3-di-O-benzyl-4-O-methylsulfonyl-6-deoxy-1-thio-β-D-glucopyranoside (S6).** Compound **S5** (6.7 g, 11.0 mmol) was dissolved in DMSO (37 mL, 0.3 M) and subsequently NaBH<sub>4</sub> (2.3 g, 60.5 mmol, 5.5 eq.) was added. The reaction mixture was heated to 85 °C and stirred for 2 h. Upon full conversion, the reaction mixture was led to attain room temperature and poured out on ice and sat. aq. NH<sub>4</sub>Cl. The mixture was filtered and rinsed with pentane to yield the crude product as a white crystalline solid. Recrystallization from EtOAc/pentane yielded the title compound (3.8 g, 7.4 mmol, 67%) as a white solid. TLC: R<sub>f</sub> 0.8 (pentane:EtOAc, 2:1, v:v); [α]<sub>D</sub><sup>20</sup> 15.9° (c 1.0, CHCl<sub>3</sub>); IR (neat, cm<sup>-1</sup>): 698, 751, 813, 958, 1040, 1070, 1094, 1177, 1355, 2930; <sup>1</sup>H NMR (500 MHz, CDCl<sub>3</sub>, HH-COSY, HSQC): δ 7.58 – 7.52 (m, 2H, CH<sub>arom</sub>), 7.38 – 7.28 (m, 13H, CH<sub>arom</sub>), 5.00 (m, 2H, CHH Bn, CHH Bn), 4.69 (m, 2H, CHH Bn, CHH Bn), 4.65 (d, *J* = 9.8 Hz, 1H, H-1), 4.30 (t, *J* = 9.5 Hz, 1H, H-4), 3.78 – 3.65 (m, 1H, H-3), 3.59 – 3.52 (m, 2H, H-5, H-2), 2.80 (s, 3H, SO<sub>2</sub>CH<sub>3</sub>), 1.44 (d, *J* = 6.2 Hz, 3H, H-6); <sup>13</sup>C NMR (126 MHz, CDCl<sub>3</sub>, HSQC): δ 137.7, 137.6, 133.3 (C<sub>q-arom</sub>), 132.4, 129.2, 128.7, 128.7, 128.4, 128.2, 128.1, 128.1, 127.5 (CH<sub>arom</sub>), 87.7 (C-1), 83.5 (C-3), 82.5 (C-4), 81.7 (C-2), 75.6, 75.6 (CH<sub>2</sub> Bn), 74.7 (C-5), 38.9 (SO<sub>2</sub>CH<sub>3</sub>), 18.2 (C-6); HRMS: [M+Na]<sup>+</sup> calcd for C<sub>27</sub>H<sub>30</sub>O<sub>6</sub>S<sub>2</sub>Na 537.1381, found 537.1379.

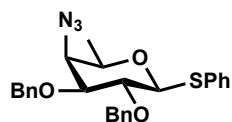

**Phenyl 2,3-di-O-benzyl-4-azido-4,6-dideoxy-1-thio-β-D-galactopyranoside (3).** Compound **S6** (3.81 g, 7.44 mmol) was dissolved in 1,3-dimethyl-3,4,5,6-tetrahydro-2-(*H*)-pyrimidone (15 mL, 0.5 M) and NaN<sub>3</sub> (725 mg, 11.2 mmol, 1.5 eq.) was added. The reaction mixture was heated to 125 °C and stirred for 18 h. Upon full conversion, the reaction was led to attain room temperature and diluted with water and EtOAc. The aqueous layer was extracted with EtOAc followed by washing the combined organic layers with H<sub>2</sub>O, sat. aq. NaHCO<sub>3</sub> and brine, respectively. Subsequently, the organic layer was dried over MgSO<sub>4</sub>, filtered, and concentrated *in vacuo* to yield the crude product as a white crystalline solid. Recrystallization from EtOH/pentane yielded the title compound (2.1 g, 4.6 mmol, 62%) as a white solid. TLC: R<sub>f</sub> 0.5 (pentane:EtOAc, 9:1, v:v); [α]<sub>D</sub><sup>20</sup> 15.7° (c 1.0, CHCl<sub>3</sub>); IR (neat, cm<sup>-1</sup>): 697, 740, 1077, 1275, 1358, 1454, 2104; <sup>1</sup>H NMR (500 MHz, CDCl<sub>3</sub>, HH-COSY, HSQC): δ 7.62 – 7.53 (m, 2H, CH<sub>arom</sub>), 7.45 – 7.27 (m, 13H, CH<sub>arom</sub>), 4.81 (d, *J* = 10.2 Hz, 1H, CHH Bn), 4.76 – 4.73 (m, 3H, CHH Bn, CHH Bn, CHH Bn), 4.67 – 4.44 (m, 1H, H-1), 3.86 – 3.65 (m, 3H, H-2, H-3, H-4), 3.57 (qd, *J* = 6.2, 0.9 Hz, 1H, H-5), 1.34 (d, *J* = 6.3 Hz, 3H, H-6); <sup>13</sup>C NMR (126 MHz, CDCl<sub>3</sub>, HSQC): δ 138.2, 137.7, 133.8 (C<sub>q-arom</sub>), 132.1, 128.9, 128.7, 128.5, 128.4, 128.1, 128.0, 127.9, 127.6 (CH<sub>arom</sub>), 87.8 (C-1), 83.2 (C-3), 77.0 (C-2), 75.9 (CH<sub>2</sub> Bn), 73.3 (C-5), 72.9 (CH<sub>2</sub> Bn), 63.8 (C-4), 18.0 (C-6); HRMS: [M+Na]<sup>+</sup> calcd for C<sub>26</sub>H<sub>27</sub>O<sub>3</sub>N<sub>3</sub>Na 484.1671, found 484.1668.

## Synthesis of compound 2

**Scheme S2.** Synthesis of compound **2**.

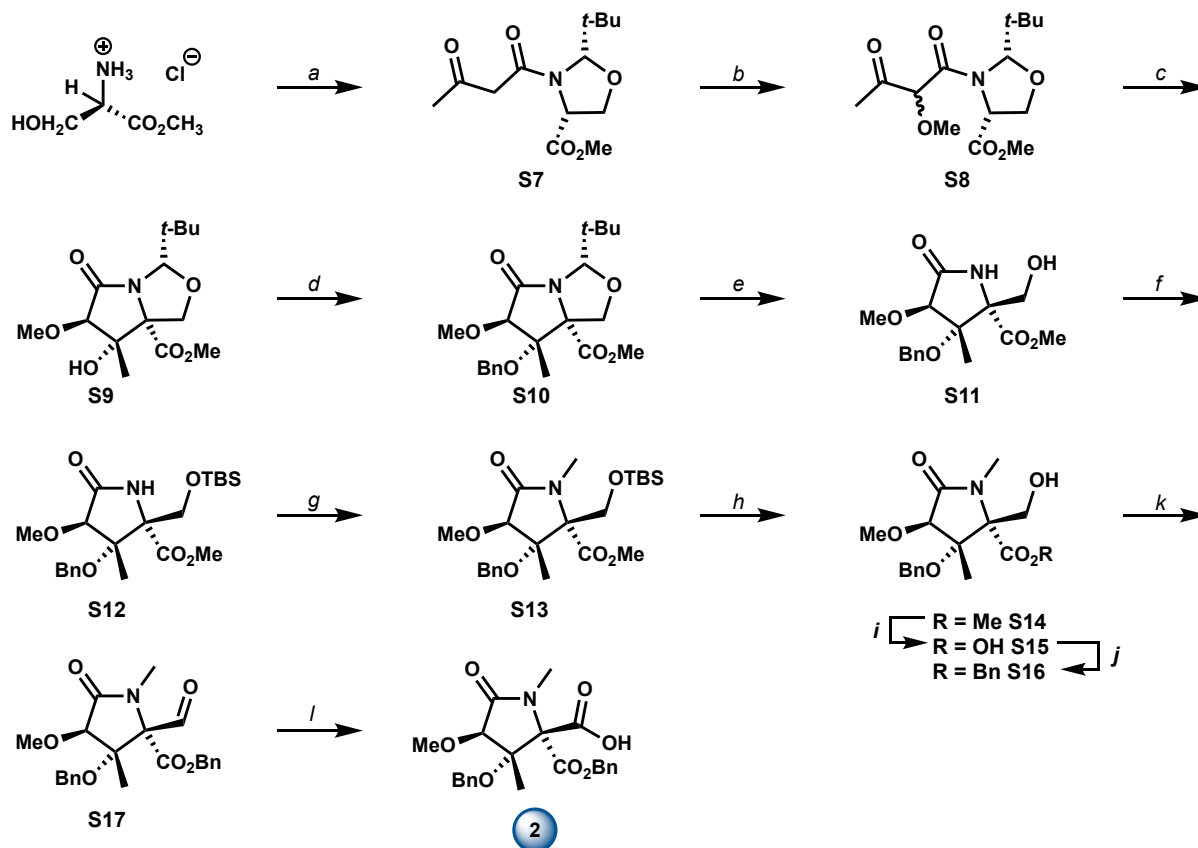

**Reagents and conditions:** a) *i*: pivaldehyde, Et<sub>3</sub>N, pentane; *ii*: acetoacetic acid, EDC·HCl, DMAP, DCM (81%); b) BAIB, BF<sub>3</sub>·OEt<sub>2</sub>, MeOH (64%); c) DBU, toluene (61%); d) BnBr, NaH, TBAI, DMF (95%); e) 1,3-propanedithiol, 37% HCl, TFE (*quant.*); f) TBSCl, imidazole, DCM (93%); g) MeI, NaH, DMF (95%); h) TBAF, THF (76%); i) LiOH·H<sub>2</sub>O, THF, H<sub>2</sub>O (*quant.*); j) *i*: Cs<sub>2</sub>CO<sub>3</sub>, MeOH, H<sub>2</sub>O; *ii*: BnBr, DMF (*quant.*); k) TPAP, NMO, 4 Å MS, DCM (72%); l) NaClO<sub>2</sub>, 20% aq. NaH<sub>2</sub>PO<sub>4</sub>, 2-methyl-2-butene, *t*-BuOH (*quant.*).

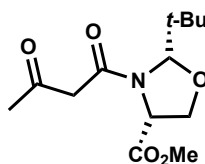

**(2S,4R)-Methyl-2-(tert-butyl)-3-(3-oxobutanoyl)oxazolidine-4-carboxylate (S7).** D-serine methyl ester hydrochloride (23 g, 150 mmol) was added to a stirred solution of pentane (750 mL, 0.2 M), Et<sub>3</sub>N (27 mL, 195 mmol, 1.3 eq.) and *t*-butyl aldehyde (21 mL, 195 mmol, 1.3 eq.) at room temperature. The mixture was refluxed for 18 h using a Dean-Stark apparatus, upon cooling back to room temperature the emulsion was filtered off and the residue thoroughly washed with pentane. The combined filtrate was concentrated to yield crude product as a clear oil. Subsequently, the crude product was dissolved in dry DCM and cooled on ice. Acetoacetic acid (18.4 g, 180 mmol, 1.2 eq.), EDC·HCl (34.5 g, 180 mmol, 1.2 eq.) and DMAP (1.8 g, 15.0 mmol, 0.1 eq.) were added and the mixture was stirred for 18 h at room temperature. Upon full conversion, the solution was diluted with water and EtOAc, the aqueous layer was extracted with EtOAc followed by washing the combined organic layers with H<sub>2</sub>O, sat. aq. NaHCO<sub>3</sub> and brine, respectively. Subsequently, the organic layer was dried over MgSO<sub>4</sub>, filtered, and concentrated *in vacuo* to yield the crude product. Flash column chromatography (80:20 → 40:60; pentane:EtOAc) yielded the title compound (32.8 g, 121 mmol, 81% over 2 steps, keto-enol tautomers; 58:42) as a colorless oil. TLC: R<sub>f</sub> 0.5 (pentane:EtOAc, 1:1, v:v); IR (neat, cm<sup>-1</sup>): 1176, 1329, 1634, 1668, 1745, 2957; NMR data for keto form: <sup>1</sup>H NMR (500 MHz, CDCl<sub>3</sub>, HH-COSY, HSQC): δ 5.30 (s, 1H, CHC(CH<sub>3</sub>)<sub>3</sub>), 4.62 (d, *J* = 5.7 Hz, 1H, CHCO<sub>2</sub>CH<sub>3</sub>), 4.56 – 4.43 (m, 1H, OCH<sub>2</sub>), 4.10 – 3.95 (m, 1H, OCH<sub>2</sub>), 3.78 (s, 3H, CO<sub>2</sub>CH<sub>3</sub>) 3.74 (s, 2H, CH<sub>2</sub>C=ON), 2.30 (s, 3H, CH<sub>3</sub>CO), 0.91 (s, 9H, C(CH<sub>3</sub>)<sub>3</sub>); <sup>13</sup>C NMR (126 MHz, CDCl<sub>3</sub>, HSQC): δ 202.8 (CH<sub>3</sub>C=O), 170.1 (CO<sub>2</sub>CH<sub>3</sub>), 168.2 (NC=O), 96.8 (CHC(CH<sub>3</sub>)<sub>3</sub>), 68.0 (OCH<sub>2</sub>), 59.6 (CHCO<sub>2</sub>CH<sub>3</sub>), 52.8 (CO<sub>2</sub>CH<sub>3</sub>), 52.0 (CH<sub>2</sub>C=ON), 37.5 (C(CH<sub>3</sub>), 25.9 (CH<sub>3</sub>C=O), 25.8 (C(CH<sub>3</sub>); data for enol form: <sup>1</sup>H NMR (500 MHz, CDCl<sub>3</sub>, HH-COSY, HSQC): 5.09 (s, 1H, CHC(CH<sub>3</sub>)<sub>3</sub>), 4.56 – 4.43 (m, 1H, OCH<sub>2</sub>), 4.10 – 3.95 (m, 1H, OCH<sub>2</sub>), 3.79 (s, 2H, CO<sub>2</sub>CH<sub>3</sub>), 1.97 (s, 3H, CH<sub>3</sub>CO), 0.92 (s, 9H, C(CH<sub>3</sub>)<sub>3</sub>); <sup>13</sup>C NMR (126 MHz, CDCl<sub>3</sub>, HSQC): δ 176.6 (NC=O), 170.5 (CO<sub>2</sub>CH<sub>3</sub>), 89.7 (CCH(CH<sub>3</sub>)<sub>3</sub>), 68.0 (OCH<sub>2</sub>), 52.9 (CO<sub>2</sub>CH<sub>3</sub>), 30.8 (C(CH<sub>3</sub>), 26.5 (C(CH<sub>3</sub>), 22.1 (CH<sub>3</sub>C=O); HRMS: [M+Na]<sup>+</sup> calcd for C<sub>13</sub>H<sub>21</sub>O<sub>5</sub>NNa 294.1317, found 294.1317.

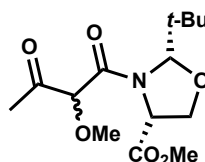

**(2S,4R)-Methyl-2-(tert-butyl)-3-(2-methoxy-3-oxobutanoyl)oxazolidine-4-carboxylate (S8).** To a vigorously stirred solution of BAIB (50.7 g, 157 mmol, 1.3 eq) in dry methanol (605 mL, 0.2 M) was dropwise added BF<sub>3</sub>·OEt<sub>2</sub> (19.4 mL, 157 mmol, 1.3 eq.). After the solution became clear, **S7** (32.8 g, 121 mmol) in methanol (85 mL, 1.4 M) was added dropwise. The mixture was stirred for 18 h and subsequently concentrated until a fifth of its original volume. The BF<sub>3</sub>·OEt<sub>2</sub> was quenched by the addition of a sat. aq. NaHCO<sub>3</sub> solution, the aqueous layer was extracted with EtOAc followed by washing the combined organic layers with H<sub>2</sub>O, sat. aq. NaHCO<sub>3</sub> and brine, respectively. Subsequently, the organic layer was dried over MgSO<sub>4</sub>, filtered, and concentrated *in vacuo* to yield the crude product. Flash column chromatography (90:10 → 70:30; pentane:EtOAc) yielded the title compound (23.3 g, 77 mmol, 64%, keto-enol tautomers; 95:5, diastereomeric mixture; 62:38) as a colorless oil. TLC: R<sub>f</sub> 0.2 (pentane:EtOAc, 8:2, v:v); IR (neat, cm<sup>-1</sup>): 1100, 1118, 1169, 1672, 1742, 2957; NMR data for major isomer: <sup>1</sup>H NMR (500 MHz, CDCl<sub>3</sub>, HH-COSY, HSQC): δ 5.27 (s, 1H, CHC(CH<sub>3</sub>)<sub>3</sub>), 5.26 (dd, *J* = 6.9, 1.8 Hz, 1H, CHCO<sub>2</sub>CH<sub>3</sub>), 4.69 (s, 1H, CHOCH<sub>3</sub>), 4.56 (dd, *J* = 8.8, 1.7 Hz, 1H, OCH<sub>2</sub>), 3.94 (dd, *J* = 8.9, 6.7 Hz, 1H, OCH<sub>2</sub>), 3.78 (s, 3H, CO<sub>2</sub>CH<sub>3</sub>), 3.47 (s, 3H, CHOCH<sub>3</sub>), 2.31 (s, 3H, CH<sub>3</sub>C=O), 0.90 (s, 9H, C(CH<sub>3</sub>)<sub>3</sub>); <sup>13</sup>C NMR (126 MHz, CDCl<sub>3</sub>, HSQC): δ 207.2 (CH<sub>3</sub>C=O), 170.2 (CO<sub>2</sub>CH<sub>3</sub>), 168.0 (NC=O), 97.2 ((CHC(CH<sub>3</sub>), 86.9 (CHOCH<sub>3</sub>), 67.8 (OCH<sub>2</sub>), 58.3 (CH<sub>2</sub>CO<sub>2</sub>CH<sub>3</sub>), 57.6 (OCH<sub>3</sub>), 52.8 (CO<sub>2</sub>CH<sub>3</sub>), 37.3 ((C(CH<sub>3</sub>)<sub>3</sub>), 26.9 (CH<sub>3</sub>C=O), 25.9 ((C(CH<sub>3</sub>)<sub>3</sub>); NMR data for minor isomer: <sup>1</sup>H NMR (500 MHz, CDCl<sub>3</sub>,

HH-COSY, HSQC):  $\delta$  5.35 (s, 1H,  $CHC(CH_3)_3$ ), 4.75 (dd,  $J = 7.0, 2.3$  Hz, 1H,  $CHCO_2CH_3$ ), 4.59 (s, 1H,  $CHOCH_3$ ), 4.42 (dd,  $J = 8.8, 2.4$  Hz, 1H,  $OCH_2$ ), 3.90 (dd,  $J = 8.8, 7.0$  Hz, 1H,  $OCH_2$ ), 3.78 (s, 3H,  $CO_2CH_3$ ), 3.45 (s, 1H,  $CHOCH_3$ ), 2.27 (s, 3H,  $CH_3C=O$ ), 0.95 (s, 9H,  $C(CH_3)_3$ );  $^{13}C$  NMR (126 MHz,  $CDCl_3$ , HSQC):  $\delta$  202.7 ( $CH_3CO$ ), 170.1 ( $CO_2CH_3$ ), 168.7 ( $NC=O$ ), 97.7 ( $CHC(CH_3)_3$ ), 88.9 ( $CHOCH_3$ ), 69.9 ( $OCH_2$ ), 59.4 ( $CHCO_2CH_3$ ), 58.7 ( $OCH_3$ ), 52.7 ( $CO_2CH_3$ ), 37.2 ( $C(CH_3)_3$ ), 27.1 ( $CH_3C=O$ ), 26.1 ( $C(CH_3)_3$ ); HRMS:  $[M+Na]^+$  calcd for  $C_{14}H_{23}O_6NNa$  324.1423, found 324.1423.

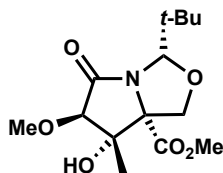

**(3S,6R,7S,7aS)-Methyl-3-(tert-butyl)-7-hydroxy-6-methoxy-7-methyl-5-oxohexahydropyrrolo [1,2-c]oxazole-7a-carboxylate (S9).** Compound **S8** (23.3 g, 77.3 mmol) was dissolved in dry toluene (1.55 L, 0.05 M), after which DBU (5.8 mL, 38.7 mmol, 0.5 eq.) was added. After stirring for 18 h at 60 °C the solution was concentrated under reduced pressure to yield the crude product as a brown solid. Flash column chromatography (90:10  $\rightarrow$  50:50; pentane:EtOAc) yielded the title compound (14.3 g, 47.4 mmol, 61%) as a colorless oil. TLC:  $R_f$  0.4 (pentane:EtOAc, 4:6, v:v); IR (neat,  $cm^{-1}$ ): 1095, 1215, 1290, 1320, 1730, 2958;  $^1H$  NMR (500 MHz,  $CDCl_3$ , HH-COSY, HSQC):  $\delta$  4.84 (s, 1H,  $CHC(CH_3)_3$ ), 4.57 (d,  $J = 9.4$  Hz, 1H,  $OCH_2$ ), 4.54 (s, 1H,  $CHOCH_3$ ), 3.89 (d,  $J = 9.4$  Hz, 1H,  $OCH_2$ ), 3.74 (s, 3H,  $CO_2CH_3$ ), 3.71 (s, 1H, OH), 3.58 (s, 3H,  $OCH_3$ ), 1.25 (s, 3H,  $CCH_3$ ), 0.80 (s, 9H,  $C(CH_3)_3$ );  $^{13}C$  NMR (126 MHz,  $CDCl_3$ , HSQC):  $\delta$  173.4 ( $NC=O$ ), 171.3 ( $CO_2CH_3$ ), 95.9 ( $CHC(CH_3)_3$ ), 85.7 ( $CH_3OCH$ ), 81.3 ( $HOCCCH_3$ ), 76.1 ( $CCO_2CH_3$ ), 69.0 ( $OCH_2$ ), 59.7 ( $OCH_3$ ), 52.7 ( $CO_2CH_3$ ), 36.4 ( $C(CH_3)_3$ ), 24.9 ( $C(CH_3)_3$ ), 18.1 ( $CCH_3$ ); HRMS:  $[M+Na]^+$  calcd for  $C_{14}H_{23}O_6NNa$  324.1423, found 324.1425.

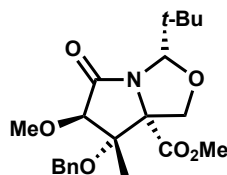

**(3S,6R,7S,7aS)-Methyl-7-O-benzyl-3-(tert-butyl)-6-methoxy-7-methyl-5-oxohexahydro pyrrolo [1,2-c]oxazole-7a-carboxylate (S10).** To a stirred solution of **S9** (14.3 g, 47.4 mmol) in DMF (66 mL, 0.7 M) and benzyl bromide (200 mL, 1.66 mol, 35 eq.) was added TBAI (21 g, 56.9 mmol, 1.2eq.). The solution was cooled to  $-15$  °C and NaH (2.9 g, 71.1 mmol, 1.5 eq., 60% in mineral oil) was added in two portions. The solution was allowed to attain 0 °C followed by quenching the reaction with a sat. aq.  $NH_4Cl$  solution. The aqueous layer was extracted with EtOAc followed by washing the combined organic layers with  $H_2O$ , sat. aq.  $NaHCO_3$  and brine, respectively. Subsequently, the organic layer was dried over  $MgSO_4$ , filtered, and concentrated *in vacuo* to yield the crude product. Flash column chromatography (95:5  $\rightarrow$  80:20; pentane:EtOAc) yielded the title compound (17.6 g, 45.0 mmol, 95%) as a colorless oil. TLC:  $R_f$  0.6 (pentane:EtOAc, 8:2, v:v); IR (neat,  $cm^{-1}$ ): 1100, 1136, 1733, 2957;  $^1H$  NMR (500 MHz,  $CDCl_3$ , HH-COSY, HSQC):  $\delta$  7.42 – 7.22 (m, 5H,  $CH_{arom}$ ), 4.93 (s, 1H,  $CHC(CH_3)_3$ ), 4.75 (d,  $J = 9.4$  Hz, 1H,  $OCH_2$ ), 4.73 (s, 1H,  $CH_3OCH$ ), 4.55 (d,  $J = 11.1$  Hz, 1H,  $CHH$  Bn), 4.48 (d,  $J = 11.1$  Hz, 1H,  $CHH$  Bn), 4.01 (d,  $J = 9.4$  Hz, 1H,  $OCH_2$ ), 3.68 (s, 3H,  $CO_2CH_3$ ), 3.65 (s, 3H,  $OCH_3$ ), 1.37 (s, 3H,  $CCH_3$ ), 0.89 (s, 9H,  $C(CH_3)_3$ );  $^{13}C$  NMR (126 MHz,  $CDCl_3$ , HSQC):  $\delta$  173.4 ( $NC=O$ ), 171.1 ( $CO_2CH_3$ ), 137.9 ( $C_{q-arom}$ ), 128.5, 127.8, 127.2 ( $CH_{arom}$ ), 96.0 ( $CHC(CH_3)_3$ ), 86.1 ( $CCH_3$ ), 85.6 ( $CH_3OCH$ ), 75.9 ( $CCO_2CH_3$ ), 69.2 ( $OCH_2$ ), 67.1 ( $CH_2$  Bn), 59.4 ( $OCH_3$ ), 52.8 ( $CO_2CH_3$ ), 36.6 ( $C(CH_3)_3$ ), 25.1 ( $C(CH_3)_3$ ), 14.0 ( $CCH_3$ ); HRMS:  $[M+Na]^+$  calcd for  $C_{21}H_{29}O_6NNa$  414.1893, found 414.1889.

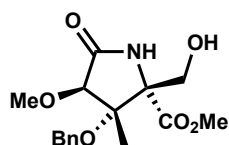

**(2S,3S,4R)-Methyl-3-O-benzyl-2-(hydroxymethyl)-4-methoxy-3-methyl-5-oxopyrrolidine-2-carboxylate (S11).** To a stirred solution of **S10** (17.6 g, 45.0 mmol) in  $\text{CF}_3\text{CH}_2\text{OH}$  (100 mL, 0.45 M) was added 1,3-propanedithiol (100 mL, 0.45 M) and 37% HCl aq. (1.4 mL, 17 mmol, 0.4 eq.). The solution was stirred for 2 h at 60 °C. Upon full conversion, the solution was allowed to attain room temperature and concentrated under reduced pressure to yield the crude product as a yellow oil subsequently. Flash column chromatography (40:60 → 10:90; pentane:EtOAc) yielded the title compound (14.3 g, 45.0 mmol, *quant.*) as a colorless oil. TLC:  $R_f$  0.2 (pentane:EtOAc, 2:8, v:v); IR (neat,  $\text{cm}^{-1}$ ): 1101, 1124, 1229, 1712, 3337;  $^1\text{H}$  NMR (400 MHz,  $\text{CDCl}_3$ , HH-COSY, HSQC):  $\delta$  7.42 – 6.94 (m, 5H,  $\text{CH}_{\text{arom}}$ ), 7.03 (s, 1H, NH), 4.58 (d,  $J = 11.4$  Hz, 1H, CHH Bn), 4.47 (d,  $J = 11.4$  Hz, 1H, CHH Bn), 4.22 (dd,  $J = 11.1$ , 6.5 Hz, 1H,  $\text{CCH}_2\text{OH}$ ), 3.99 (s, 1H,  $\text{CH}_3\text{OCH}$ ), 3.77 (dd,  $J = 11.1$ , 6.1 Hz, 1H,  $\text{CCH}_2\text{OH}$ ), 3.71 (s, 3H,  $\text{CO}_2\text{CH}_3$ ), 3.63 (s, 3H,  $\text{OCH}_3$ ), 3.30 (t,  $J = 6.4$  Hz, 1H, OH), 1.42 (s, 3H,  $\text{CCH}_3$ );  $^{13}\text{C}$  NMR (101 MHz,  $\text{CDCl}_3$ , HSQC):  $\delta$  173.6 (NC=O), 171.1 ( $\text{CO}_2\text{CH}_3$ ), 138.0 ( $\text{C}_{\text{q- arom}}$ ), 128.4, 127.6, 126.9 ( $\text{CH}_{\text{arom}}$ ), 84.4 ( $\text{CCH}_3$ ), 82.6 ( $\text{CH}_3\text{OCH}$ ), 72.7 ( $\text{CCO}_2\text{CH}_3$ ), 65.8 ( $\text{CH}_2$  Bn), 64.6 ( $\text{CCH}_2\text{OH}$ ), 59.5 ( $\text{OCH}_3$ ), 52.9 ( $\text{CO}_2\text{CH}_3$ ), 12.7 ( $\text{CCH}_3$ ); HRMS:  $[\text{M}+\text{Na}]^+$  calcd for  $\text{C}_{16}\text{H}_{21}\text{O}_6\text{NNa}$  346.1267, found 346.1261.

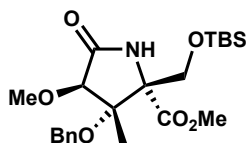

**(2S,3S,4R)-Methyl-3-O-benzyl-2-(O-(tert-butyldimethylsilyl)methyl)-4-methoxy-3-methyl-5-oxopyrrolidine-2-carboxylate (S12).** Compound **S11** (14.3 g, 45.0 mmol) was dissolved in DCM (900 mL, 0.05 M) followed by the addition of TBSCl (10.2 g, 67.5 mmol, 1.5 eq.) and imidazole (4.6 g, 67.5 mmol, 1.5 eq.). The solution was stirred for 16 h at room temperature, and upon full conversion, the mixture was diluted with water and brine. The aqueous layer was extracted with EtOAc followed by washing the combined organic layers with  $\text{H}_2\text{O}$ , sat. aq.  $\text{NaHCO}_3$  and brine, respectively. Subsequently, the organic layer was dried over  $\text{MgSO}_4$ , filtered, and concentrated *in vacuo* to yield the crude product. Flash column chromatography (90:10 → 70:30; pentane:EtOAc) yielded the title compound (18.0 g, 42.0 mmol, 93%) as a colorless oil. TLC:  $R_f$  0.5 (pentane:EtOAc, 8:2, v:v); IR (neat,  $\text{cm}^{-1}$ ): 837, 1088, 1252, 1720, 2951;  $^1\text{H}$  NMR (400 MHz,  $\text{CDCl}_3$ , HH-COSY, HSQC):  $\delta$  7.42 – 7.18 (m, 5H,  $\text{CH}_{\text{arom}}$ ), 6.21 (s, 1H, NH), 4.57 (d,  $J = 11.5$  Hz, 1H, CHH Bn), 4.48 (d,  $J = 11.5$  Hz, 1H, CHH Bn), 4.23 (d,  $J = 9.1$  Hz, 1H,  $\text{CCH}_2\text{OTBS}$ ), 3.88 (s, 1H,  $\text{CH}_3\text{OCH}$ ), 3.68 (d,  $J = 9.0$  Hz, 1H,  $\text{CCH}_2\text{OTBS}$ ), 3.68 (s, 3H,  $\text{CO}_2\text{CH}_3$ ), 3.63 (s, 3H,  $\text{OCH}_3$ ), 1.41 (s, 3H,  $\text{CCH}_3$ ), 0.85 (s, 9H,  $\text{SiC}(\text{CH}_3)_3$ ), 0.05 (d,  $J = 6.4$  Hz, 6H,  $\text{SiCH}_3$ ,  $\text{SiCH}_3$ );  $^{13}\text{C}$  NMR (101 MHz,  $\text{CDCl}_3$ , HSQC):  $\delta$  172.6 (NC=O), 170.7 ( $\text{CO}_2\text{CH}_3$ ), 138.1 ( $\text{C}_{\text{q- arom}}$ ), 128.4, 127.6, 126.9 ( $\text{CH}_{\text{arom}}$ ), 83.9 ( $\text{CCH}_3$ ), 82.3 ( $\text{CH}_3\text{OCH}$ ), 73.1 ( $\text{CCO}_2\text{CH}_3$ ), 65.6 ( $\text{CH}_2$  Bn), 65.6 ( $\text{CCH}_2\text{OTBS}$ ), 59.4 ( $\text{OCH}_3$ ), 52.6 ( $\text{CO}_2\text{CH}_3$ ), 25.8 ( $\text{SiC}(\text{CH}_3)_3$ ), 18.2 ( $\text{SiC}(\text{CH}_3)_3$ ), 12.9 ( $\text{CCH}_3$ ), -5.3 ( $\text{SiCH}_3$ ), -5.6 ( $\text{SiCH}_3$ ); HRMS:  $[\text{M}+\text{Na}]^+$  calcd for  $\text{C}_{22}\text{H}_{35}\text{O}_6\text{NSiNa}$  460.2131, found 460.2127.

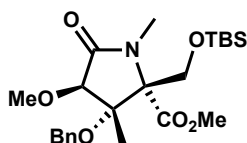

**(2S,3S,4R)-Methyl-3-O-benzyl-2-(O-(tert-butyldimethylsilyl)methyl)-4-methoxy-1,3-dimethyl-5-oxopyrrolidine-2-carboxylate (S13).** To a stirred solution of **S12** (530 mg, 1.23 mmol) in DMF (25 mL, 0.05 M) was added MeI (0.77 mL, 12.3 mL, 10.0 eq.). The mixture was cooled to 0 °C and NaH (128 mg, 3.2 mmol, 2.6 eq., 60% in mineral oil) was added. The mixture was allowed to attain room temperature, and upon full conversion, quenched with a sat. aq.  $\text{NH}_4\text{Cl}$  solution. The aqueous layer was extracted with EtOAc followed by washing the combined organic layers with  $\text{H}_2\text{O}$ , sat. aq.  $\text{NaHCO}_3$  and brine, respectively. Subsequently, the organic layer was dried over  $\text{MgSO}_4$ , filtered, and concentrated *in*

*vacuo* to yield the crude product. Flash column chromatography (90:10 → 70:30; pentane:EtOAc) yielded the title compound (518 mg, 1.16 mmol, 95%) as a colorless oil. TLC:  $R_f$  0.4 (pentane:EtOAc, 9:1, v:v); IR (neat,  $\text{cm}^{-1}$ ): 837, 1098, 1249, 1715, 2952;  $^1\text{H}$  NMR (400 MHz,  $\text{CDCl}_3$ , HH-COSY, HSQC):  $\delta$  7.39 – 7.18 (m, 5H,  $\text{CH}_{\text{arom}}$ ), 4.62 (d,  $J = 11.5$  Hz, 1H,  $\text{CHH}$  Bn), 4.51 (d,  $J = 11.5$  Hz, 1H,  $\text{CHH}$  Bn), 4.21 (d,  $J = 10.8$  Hz, 1H,  $\text{CCH}_2\text{OTBS}$ ), 3.99 (s, 1H,  $\text{CH}_3\text{OCH}$ ), 3.96 (d,  $J = 10.8$  Hz, 1H,  $\text{CCH}_2\text{OTBS}$ ), 3.67 (s, 3H,  $\text{OCH}_3$ ), 3.66 (s, 3H,  $\text{CO}_2\text{CH}_3$ ), 2.92 (s, 3H,  $\text{NCH}_3$ ), 1.39 (s, 3H,  $\text{CCH}_3$ ), 0.87 (s, 9H,  $\text{SiC}(\text{CH}_3)_3$ ), 0.08 (s, 3H,  $\text{SiCH}_3$ ), 0.08 (s, 3H,  $\text{SiCH}_3$ );  $^{13}\text{C}$  NMR (101 MHz,  $\text{CDCl}_3$ , HSQC):  $\delta$  172.6 ( $\text{NC}=\text{O}$ ), 170.3 ( $\text{CO}_2\text{CH}_3$ ), 138.4 ( $\text{C}_{\text{q-arom}}$ ), 128.4, 127.6, 126.9 ( $\text{CH}_{\text{arom}}$ ), 83.3 ( $\text{CCH}_3$ ), 82.5 ( $\text{CH}_3\text{OCH}$ ), 75.2 ( $\text{CCO}_2\text{CH}_3$ ), 65.9 ( $\text{CH}_2$  Bn), 63.2 ( $\text{CCH}_2\text{OTBS}$ ), 59.5 ( $\text{OCH}_3$ ), 52.4 ( $\text{CO}_2\text{CH}_3$ ), 28.5 ( $\text{NCH}_3$ ), 25.8 ( $\text{SiC}(\text{CH}_3)_3$ ), 18.1 ( $\text{SiC}(\text{CH}_3)_3$ ), 13.4 ( $\text{CCH}_3$ ), -5.6 ( $\text{SiCH}_3$ ), -5.8 ( $\text{SiCH}_3$ ); HRMS:  $[\text{M}+\text{Na}]^+$  calcd for  $\text{C}_{23}\text{H}_{37}\text{O}_6\text{NSiNa}$  474.2288, found 474.2287.

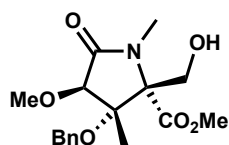

**(2S,3S,4R)-Methyl-3-O-benzyl-2-(hydroxymethyl)-4-methoxy-1,3-dimethyl-5-oxopyrrolidine-2-carboxylate (S14).** To a stirred solution of **S13** (18.7 g, 42 mmol) in THF (500 mL, 0.05 M) TBAF (210 mL, 1.0 M, 5.0 eq.) was added. The mixture was stirred for 3 h, and upon full conversion, quenched with water. The aqueous layer was extracted with EtOAc followed by washing the combined organic layers with  $\text{H}_2\text{O}$ , sat. aq.  $\text{NaHCO}_3$  and brine, respectively. Subsequently, the organic layer was dried over  $\text{MgSO}_4$ , filtered, and concentrated *in vacuo* to yield the crude product. Flash column chromatography (70:30 → 30:70; pentane:EtOAc) yielded the title compound (10.5 g, 32.0 mmol, 76%) as a colorless oil. TLC:  $R_f$  0.1 (pentane:EtOAc, 7:3, v:v);  $[\alpha]_D^{20}$  55.7° (c 1.0,  $\text{CHCl}_3$ ); IR (neat,  $\text{cm}^{-1}$ ): 1099, 1273, 1700, 1736, 3427;  $^1\text{H}$  NMR (400 MHz,  $\text{CDCl}_3$ , HH-COSY, HSQC):  $\delta$  7.38 – 7.18 (m, 5H,  $\text{CH}_{\text{arom}}$ ), 4.64 (d,  $J = 11.6$  Hz, 1H,  $\text{CHH}$  Bn), 4.50 (d,  $J = 11.6$  Hz, 1H,  $\text{CHH}$  Bn), 4.09 (d,  $J = 12.2$  Hz, 1H,  $\text{CH}_2\text{OH}$ ), 4.07 (s, 1H,  $\text{CH}_3\text{CH}$ ), 3.98 (d,  $J = 12.2$  Hz, 1H,  $\text{CH}_2\text{OH}$ ), 3.72 (s, 3H,  $\text{CO}_2\text{CH}_3$ ), 3.70 (s, 3H,  $\text{OCH}_3$ ), 2.89 (s, 3H,  $\text{NCH}_3$ ), 2.76 (s, 1H, OH), 1.44 (s, 3H,  $\text{CCH}_3$ );  $^{13}\text{C}$  NMR (101 MHz,  $\text{CDCl}_3$ , HSQC):  $\delta$  172.6 ( $\text{NC}=\text{O}$ ), 167.9 ( $\text{CO}_2\text{CH}_3$ ), 137.5 ( $\text{C}_{\text{q-arom}}$ ), 128.6, 128.0, 127.1 ( $\text{CH}_{\text{arom}}$ ), 84.5 ( $\text{CCH}_3$ ), 82.4 ( $\text{CH}_3\text{OCH}$ ), 80.3 ( $\text{CCO}_2\text{CH}_3$ ), 67.0 ( $\text{CH}_2$  Bn), 62.6 ( $\text{CH}_2\text{OH}$ ), 59.5 ( $\text{OCH}_3$ ), 53.4 ( $\text{CO}_2\text{CH}_3$ ), 29.1 ( $\text{NCH}_3$ ), 14.4 ( $\text{CCH}_3$ ); HRMS:  $[\text{M}+\text{Na}]^+$  calcd for  $\text{C}_{17}\text{H}_{23}\text{O}_6\text{NNa}$  360.1423, found 360.1421.

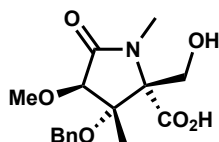

**(2S,3S,4R)-3-O-Benzyl-2-(hydroxymethyl)-4-methoxy-1,3-dimethyl-5-oxopyrrolidine-2-carboxylic acid (S15).** Compound **S14** (1.65 g, 5.0 mmol) was dissolved in THF (50 mL, 0.1 M) and  $\text{H}_2\text{O}$  (50 mL, 0.1 M),  $\text{LiOH}\cdot\text{H}_2\text{O}$  (1.05 g, 25.0 mmol, 5.0 eq.) was added and the mixture was stirred for 18 h. Upon full conversion, the pH was adjusted with 1 M aq.  $\text{HCl}$  until a pH = 1 was obtained. The aqueous layer was extracted with EtOAc followed by washing the combined organic layers with  $\text{H}_2\text{O}$ , sat. aq.  $\text{NaHCO}_3$  and brine, respectively. Subsequently, the organic layer was dried over  $\text{MgSO}_4$ , filtered, and concentrated *in vacuo* to yield the product (1.58 g, 5.0 mmol, *quant.*) as a white solid. TLC:  $R_f$  0.5 (DCM:MeOH, 8:2, v:v);  $[\alpha]_D^{20}$  29.0° (c 0.5,  $\text{CHCl}_3$ ); IR (neat,  $\text{cm}^{-1}$ ): 1099, 1213, 1453, 1691, 2944, 3434;  $^1\text{H}$  NMR (400 MHz,  $\text{CDCl}_3$ , HH-COSY, HSQC):  $\delta$  7.34 – 7.16 (m, 5H,  $\text{CH}_{\text{arom}}$ ), 4.62 (d,  $J = 11.7$  Hz, 1H,  $\text{CHH}$  Bn), 4.49 (d,  $J = 11.7$  Hz, 1H,  $\text{CHH}$  Bn), 4.14 – 4.05 (m, 2H,  $\text{CH}_2\text{OH}$ ,  $\text{CH}_3\text{CH}$ ), 3.98 (d,  $J = 12.4$  Hz, 1H,  $\text{CH}_2\text{OH}$ ), 3.64 (s, 3H,  $\text{OCH}_3$ ), 2.89 (s, 3H,  $\text{NCH}_3$ ), 1.44 (s, 3H,  $\text{CCH}_3$ );  $^{13}\text{C}$  NMR (101 MHz,  $\text{CDCl}_3$ , HSQC):  $\delta$  173.7 ( $\text{CO}_2\text{H}$ ), 172.7 ( $\text{NC}=\text{O}$ ), 138.0 ( $\text{C}_{\text{q-arom}}$ ), 128.4, 127.6, 126.8 ( $\text{CH}_{\text{arom}}$ ), 83.5 ( $\text{CCH}_3$ ), 81.9 ( $\text{CH}_3\text{OCH}$ ), 74.8 ( $\text{CCO}_2\text{H}$ ), 66.1 ( $\text{CH}_2$  Bn), 62.3 ( $\text{CH}_2\text{OH}$ ), 59.6 ( $\text{OCH}_3$ ), 28.0 ( $\text{NCH}_3$ ), 12.9 ( $\text{CCH}_3$ ); HRMS:  $[\text{M}+\text{Na}]^+$  calcd for  $\text{C}_{16}\text{H}_{21}\text{O}_6\text{NNa}$  346.1267, found 346.1261.



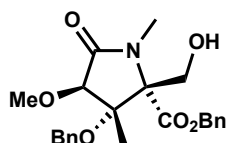

**Benzyl-(2*S*,3*S*,4*R*)-Methyl-3-*O*-benzyl-2-(hydroxymethyl)-4-methoxy-1,3-dimethyl-5-oxopyrrolidine-2-carboxylate (S16).** To a stirred solution of **S15** (535 mg, 1.7 mmol) in MeOH:H<sub>2</sub>O (5:1, 3.4 mL, 0.5 M) was added Cs<sub>2</sub>CO<sub>3</sub> (276 mg, 0.85 mmol, 0.5 eq.), after 30 min the mixture was concentrated under reduced pressure, co-evaporated to dryness with toluene (3x) and dissolved in DMF (8.5 mL, 0.2 M). The solution was cooled on ice and consequently BnBr (240 μL, 2.0 mmol, 1.2 eq.) was added. Upon 18 h of stirring the mixture was quenched with a sat. aq. NH<sub>4</sub>Cl solution, the aqueous layer was extracted with EtOAc followed by washing the combined organic layers with H<sub>2</sub>O, sat. aq. NaHCO<sub>3</sub> and brine, respectively. Subsequently, the organic layer was dried over MgSO<sub>4</sub>, filtered, and concentrated *in vacuo* to yield the crude product. Flash column chromatography (50:50; pentane:EtOAc) yielded the title compound (889 mg, 1.7 mmol, *quant.*) as a colorless oil. TLC: R<sub>f</sub> 0.4 (pentane:EtOAc, 1:1, v:v); [α]<sub>D</sub><sup>20</sup> 69.3° (c 1.0, CHCl<sub>3</sub>); IR (neat, cm<sup>-1</sup>): 1098, 1217, 1454, 1700, 3430; <sup>1</sup>H NMR (400 MHz, CDCl<sub>3</sub>, HH-COSY, HSQC): δ 7.40 – 7.08 (m, 10H, CH<sub>arom</sub>), 5.16 (d, *J* = 12.1 Hz, 1H, CHH Bn), 5.08 (d, *J* = 12.1 Hz, 1H, CHH Bn), 4.60 (d, *J* = 11.5 Hz, 1H, CHH Bn), 4.43 (d, *J* = 11.5 Hz, 1H, CHH Bn), 4.10 (dd, *J* = 12.4, 7.9 Hz, 1H, CH<sub>2</sub>OH), 4.04 (s, 1H, CH<sub>3</sub>OCH), 3.98 (dd, *J* = 12.4, 6.0 Hz, 1H, CH<sub>2</sub>OH), 3.65 (s, 3H, OCH<sub>3</sub>), 2.88 (s, 3H, NCH<sub>3</sub>), 2.77 (dd, *J* = 7.9, 6.1 Hz, 1H, OH), 1.43 (s, 3H, CCH<sub>3</sub>); <sup>13</sup>C NMR (101 MHz, CDCl<sub>3</sub>, HSQC): δ 172.4 (CO<sub>2</sub>H), 170.2 (NC=O), 138.1, 134.8 (C<sub>q-arom</sub>), 128.8, 128.7, 128.5, 127.6, 127.0 (CH<sub>arom</sub>), 83.5 (CCH<sub>3</sub>), 82.1 (CH<sub>3</sub>OCH), 74.9 (CCO<sub>2</sub>Bn), 67.8, 66.1 (CH<sub>2</sub> Bn), 62.5 (CH<sub>2</sub>OH), 59.5 (OCH<sub>3</sub>), 27.9 (NCH<sub>3</sub>), 12.9 (CCH<sub>3</sub>); HRMS: [M+Na]<sup>+</sup> calcd for C<sub>23</sub>H<sub>27</sub>O<sub>6</sub>NNa 436.1736, found 436.1731.

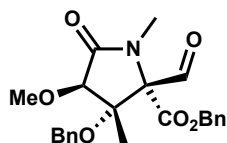

**Benzyl-(2*R*,3*S*,4*R*)-Methyl-3-*O*-benzyl-2-formyl-4-methoxy-1,3-dimethyl-5-oxopyrrolidine-2-carboxylate (S17).** Compound **S16** (774 mg, 1.9 mmol) was dissolved in dry DCM (38 mL, 0.05 M) and 4 Å molecular sieves were added. After stirring the solution for 30 min under an inert atmosphere, NMO (333 mg, 2.9 mmol, 1.5 eq.) and TPAP (33 mg, 0.1 mmol, 0.05 eq.) were added. Full conversion was achieved in approximately 6 h upon which the solution was concentrated to yield the crude product as a black oil. Flash column chromatography (90:10 → 80:20; pentane:EtOAc) yielded the title compound (551 mg, 1.37 mmol, 72%) as a colorless oil. TLC: R<sub>f</sub> 0.8 (pentane:acetone, 8:2, v:v); [α]<sub>D</sub><sup>20</sup> 56.9° (c 1.0, CHCl<sub>3</sub>); IR (neat, cm<sup>-1</sup>): 1101, 1218, 1722, 3033; <sup>1</sup>H NMR (400 MHz, CDCl<sub>3</sub>, HH-COSY, HSQC): δ 10.07 (s, 1H, CHO), 7.46 – 7.07 (m, 10H, CH<sub>arom</sub>), 5.23 (d, *J* = 12.0 Hz, 1H, CHH Bn), 5.16 (d, *J* = 12.0 Hz, 1H, CHH Bn), 4.62 (d, *J* = 11.2 Hz, 1H, CHH Bn), 4.52 (d, *J* = 11.2 Hz, 1H, CHH Bn), 4.17 (s, 1H, CH<sub>3</sub>OCH), 3.65 (s, 3H, OCH<sub>3</sub>), 2.83 (s, 3H, NCH<sub>3</sub>), 1.33 (s, 3H, CCH<sub>3</sub>); <sup>13</sup>C NMR (101 MHz, CDCl<sub>3</sub>, HSQC): δ 194.4 (CHO), 172.6 (CO<sub>2</sub>Bn), 167.3 (NC=O), 137.5, 134.4 (C<sub>q-arom</sub>), 128.9, 128.8, 128.6, 128.6, 128.0, 127.3 (CH<sub>arom</sub>), 84.5 (CCH<sub>3</sub>), 82.3 (CH<sub>3</sub>OCH), 80.3 (CCO<sub>2</sub>Bn), 68.5, 67.0 (CH<sub>2</sub> Bn), 59.5 (OCH<sub>3</sub>), 29.1 (NCH<sub>3</sub>), 14.4 (CCH<sub>3</sub>); HRMS: [M+Na]<sup>+</sup> calcd for C<sub>23</sub>H<sub>25</sub>O<sub>6</sub>NNa 434.1580, found 434.1576.

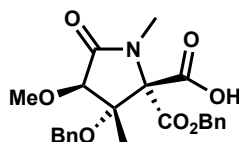

**Benzyl-(2*R*,3*S*,4*R*)-3-*O*-benzyl-4-methoxy-2-(methoxycarbonyl)-1,3-dimethyl-5-oxopyrrolidine-2-carboxylic acid (2).** A stirred solution of **S17** (551 mg, 1.37 mmol) in *t*-BuOH (15.6 mL, 0.1 M) and 2-methyl-2-butene (9.6 mL) was treated with an aqueous solution of NaClO<sub>2</sub> (1.23 g, 13.7 mmol, 10 eq.) in 20% NaH<sub>2</sub>PO<sub>4</sub> (9.6 mL). After 2 h the mixture was quenched by adding sat. aq. Na<sub>2</sub>S<sub>2</sub>O<sub>3</sub> and sat. aq. NH<sub>4</sub>Cl. The aqueous layer was extracted twice with EtOAc followed by washing the combined organic

layers with H<sub>2</sub>O, sat. aq. NaHCO<sub>3</sub> and brine, respectively. Subsequently, the organic layer was dried over MgSO<sub>4</sub>, filtered, and concentrated *in vacuo* to yield the crude product. Flash column chromatography (50:50; pentane:EtOAc) yielded the title compound (889 mg, 1.7 mmol, *quant.*) as a colorless oil. TLC: R<sub>f</sub> 0.4 (pentane:EtOAc, 1:1, v:v); [α]<sub>D</sub><sup>20</sup> 64.3° (c 1.0, CHCl<sub>3</sub>); IR (neat, cm<sup>-1</sup>): 1050, 1095, 1134, 1274, 1727, 2937; <sup>1</sup>H NMR (400 MHz, CDCl<sub>3</sub>, HH-COSY, HSQC): δ 7.41 – 7.12 (m, 10H, CH<sub>arom</sub>), 5.28 (d, *J* = 11.9 Hz, 1H, CHH Ph), 5.22 (d, *J* = 11.9 Hz, 1H, CHH Ph), 4.67 (d, *J* = 11.6 Hz, 1H, CHH Ph), 4.41 (d, *J* = 11.6 Hz, 1H, CHH Ph), 4.00 (s, 1H, CH<sub>3</sub>OCH), 3.62 (s, 3H, OCH<sub>3</sub>), 2.82 (s, 3H, NCH<sub>3</sub>), 1.46 (s, 3H, CCH<sub>3</sub>); <sup>13</sup>C NMR (101 MHz, CDCl<sub>3</sub>, HSQC): δ 172.2 (NC=O), 170.4 (CO<sub>2</sub>Bn), 164.8 (CO<sub>2</sub>H), 137.4, 133.7 (C<sub>q</sub>-arom), 129.4, 129.0, 128.9, 128.6, 128.0, 127.1 (CH<sub>arom</sub>), 84.5 (CCH<sub>3</sub>), 82.6 (CH<sub>3</sub>OCH), 78.2 (CCO<sub>2</sub>Bn), 69.8, 66.9 (CH<sub>2</sub> Bn), 59.6 (OCH<sub>3</sub>), 28.9 (NCH<sub>3</sub>), 15.3 (CCH<sub>3</sub>); HRMS: [M+Na]<sup>+</sup> calcd for C<sub>23</sub>H<sub>25</sub>O<sub>7</sub>NNa 450.1529, found 450.1524.

## Synthesis of compound 23

Scheme S3. Synthesis of compound 23.

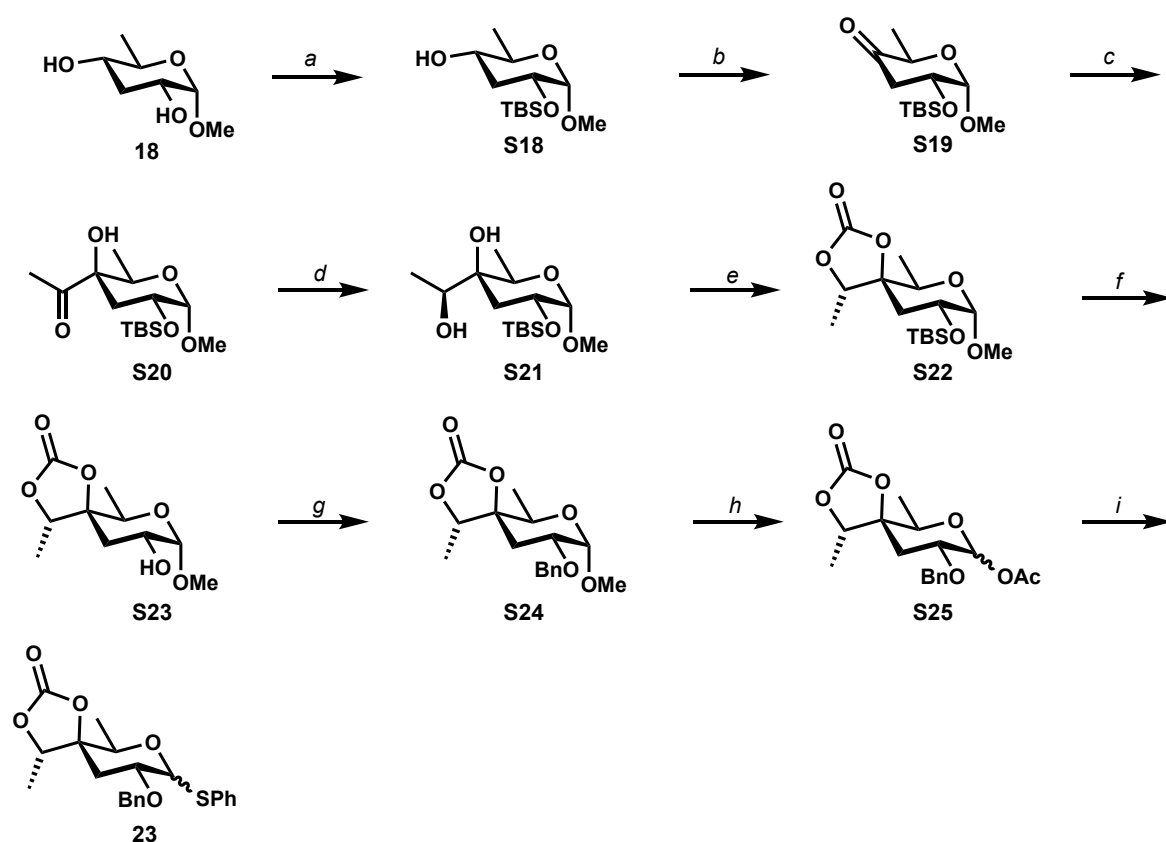

*Reagents and conditions:* a) imidazole, TBSCl, DMF, -30 °C (69%); b) DMP, DCM (91%); c) AcCl, Sml<sub>2</sub>, THF (57%); d) ZnBH<sub>4</sub>, THF (86%); e) triphosgene, pyridine, DCM (78%); f) HCl aq., MeOH (91%); g) benzyl 2,2,2-trichloroacetimidate, TfOH, dioxane (*quant.*); h) Ac<sub>2</sub>O, H<sub>2</sub>SO<sub>4</sub> (98%); i) thiophenol, BF<sub>3</sub>·OEt<sub>2</sub>, DCM (97%).

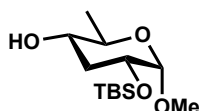

**Methyl 3,6-dideoxy-2-*O*-*tert*-butyldimethylsilyl- $\alpha$ -D-allopyranoside (S18).** Compound **18** (8.4 g, 51.5 mmol) and imidazole (6.8 g, 103 mmol, 2.0 eq.) were dissolved in DMF (103 mL, 0.5 M), the solution was cooled to -30 °C upon which TBSCl (8.2 g, 54 mmol, 1.05 eq.) was added. The mixture was stirred for 2 h while the mixture was allowed to warm to room temperature. Upon full conversion, the reaction was quenched with water and diluted with Et<sub>2</sub>O. The aqueous layer was extracted with Et<sub>2</sub>O (3x) followed

by washing the combined organic layers with H<sub>2</sub>O, sat. aq. NaHCO<sub>3</sub> and brine, respectively. Subsequently, the organic layer was dried over MgSO<sub>4</sub>, filtered, and concentrated *in vacuo* to yield the crude product as a colorless oil. Flash column chromatography (95:5 → 80:20; pentane:EtOAc) yielded the title compound (9.9 g, 35.7 mmol, 69%) as a colorless oil. TLC: R<sub>f</sub> 0.8 (pentane:EtOAc, 7:3, v:v); [α]<sub>D</sub><sup>20</sup> 36.4° (c 1.0, CHCl<sub>3</sub>); IR (neat, cm<sup>-1</sup>): 1260, 2930, 3445; <sup>1</sup>H NMR (400 MHz, CDCl<sub>3</sub>, HH-COSY, HSQC): δ 4.48 (d, *J* = 3.4 Hz, 1H, H-1), 3.78 (ddd, *J* = 11.7, 4.7, 3.5 Hz, 1H, H-2), 3.53 (dq, *J* = 9.0, 6.2 Hz, 1H, H-5), 3.42 (s, 3H, CH<sub>3</sub> OMe), 3.28 (ddd, *J* = 11.2, 9.2, 4.6 Hz, 1H, H-4), 2.03 (dt, *J* = 11.6, 4.6 Hz, 1H, H-3), 1.90 (s, 1H, 4-OH), 1.82 (q, *J* = 11.5 Hz, 1H, H-3), 1.25 (d, *J* = 6.2 Hz, 3H, H-6), 0.89 (s, 9H, C(CH<sub>3</sub>)<sub>3</sub>), 0.08 (s, 6H, Si(CH<sub>3</sub>)<sub>2</sub>); <sup>13</sup>C NMR (101 MHz, CDCl<sub>3</sub>, HSQC): δ 99.3 (C-1), 71.2 (C-4), 68.9 (C-2), 68.5 (C-5), 55.2 (CH<sub>3</sub> OMe), 36.8 (C-3), 26.0 (C(CH<sub>3</sub>)<sub>3</sub>), 18.4 (C(CH<sub>3</sub>)<sub>3</sub>), 17.5 (C-6), -4.5 (SiCH<sub>3</sub>), -4.6 (SiCH<sub>3</sub>); HRMS: [M+Na]<sup>+</sup> calcd for C<sub>13</sub>H<sub>28</sub>O<sub>4</sub>SiNa 299.1655, found 299.1654.

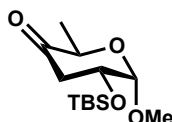

**Methyl 3,6-dideoxy-2-*O*-tert-butyldimethylsilyl- $\alpha$ -D-erythropranosid-4-ulose (S19).** Compound **S18** (9.8 g, 35.7 mmol) was dissolved in DCM (210 mL, 0.17 M) under N<sub>2</sub> atmosphere. Dess-Martin periodinane (22.7 g, 53.6 mmol, 1.5 eq.) was added and the mixture was stirred for 4.5 h upon the reaction was quenched with water. The aqueous layer was extracted with DCM (3x) followed by washing the combined organic layers with H<sub>2</sub>O, sat. aq. NaHCO<sub>3</sub> and brine, respectively. Subsequently, the organic layer was dried over MgSO<sub>4</sub>, filtered, and concentrated *in vacuo* to yield the crude product as a white oil. Flash column chromatography (95:5 → 90:10; pentane:Et<sub>2</sub>O) yielded the title compound (8.9 g, 32.5 mmol, 91%) as a colorless oil. TLC: R<sub>f</sub> 0.5 (pentane:Et<sub>2</sub>O, 9:1, v:v); [α]<sub>D</sub><sup>20</sup> -8.0° (c 0.5, CHCl<sub>3</sub>); IR (neat, cm<sup>-1</sup>): 1119, 1261, 1728, 1794, 2857, 2930; <sup>1</sup>H NMR (400 MHz, CDCl<sub>3</sub>, HH-COSY, HSQC): δ 4.71 (d, *J* = 3.3 Hz, 1H, H-1), 4.17 – 4.07 (m, 2H, H-5 and H-2), 3.53 (s, 3H, CH<sub>3</sub> OMe), 2.76 (dd, *J* = 15.2, 10.8 Hz, 1H, H-3), 2.61 (dd, *J* = 15.3, 5.6 Hz, 1H, H-3), 1.27 (d, *J* = 6.7 Hz, 3H, CH<sub>3</sub> H-6), 0.89 (s, 9H, C(CH<sub>3</sub>)<sub>3</sub>), 0.09 (s, 3H, SiCH<sub>3</sub>), 0.08 (s, 3H, SiCH<sub>3</sub>); <sup>13</sup>C NMR (101 MHz, CDCl<sub>3</sub>, HSQC): δ 206.8 (C-4), 99.4 (C-1), 70.1 (C-5), 69.3 (C-2), 56.1 (CH<sub>3</sub> OMe), 44.0 (C-3), 25.9 (C(CH<sub>3</sub>)<sub>3</sub>), 18.3 (C(CH<sub>3</sub>)<sub>3</sub>), 14.6 (C-6), -4.6 (SiCH<sub>3</sub>); HRMS: [M+Na]<sup>+</sup> calcd for C<sub>13</sub>H<sub>26</sub>O<sub>4</sub>SiNa 297.1498, found 297.1496.

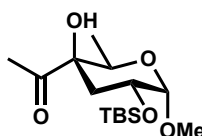

**Methyl 4-C-acetyl-3,6-dideoxy-2-*O*-tert-butyldimethylsilyl- $\alpha$ -D-galactopyranoside (S20).** Compound **S19** (221 mg, 0.8 mmol) was co-evaporated with dry toluene once under N<sub>2</sub> atmosphere. Glycoside **S19** was dissolved in THF (1.6 mL, 0.5 M) and cooled to -80 °C. The solution was flushed with N<sub>2</sub> with 30 mbar overpressure for 25 min, after which AcCl (143  $\mu$ L, 2 mmol, 2.5 eq.) was added and the solution was flushed with N<sub>2</sub> with 30 mbar overpressure for another 5 min. A flame-dried flask was flushed with N<sub>2</sub> by using a Schlenk line for 16 h. After flushing the flask, it was filled with SmI<sub>2</sub> (28 mL, 2.8 mmol, 3.5 eq, [0.1 M solution in THF, stabilized by samarium chips, Sigma-Aldrich]) by using a pre-flushed cannula. The flask with SmI<sub>2</sub> was heated to 40 °C and the solution of ketone **S19** and AcCl in THF was added with a syringe. The reaction was quenched after 10 min with 20 mL 1 M HCl, diluted with 20 mL EtOAc and stirred for 30 min. The mixture was washed with H<sub>2</sub>O, sat. aq. Na<sub>2</sub>S<sub>2</sub>O<sub>3</sub> and brine, respectively. The organic phase was dried over MgSO<sub>4</sub>, filtered, and concentrated *in vacuo*. Flash column chromatography (90:10; pentane:EtOAc) afforded the title compound (145 mg, 455  $\mu$ mol, 57%) as a colorless oil. TLC: R<sub>f</sub> 0.3 (pentane:Et<sub>2</sub>O, 8:2, v:v); [α]<sub>D</sub><sup>20</sup> 42.4° (c 1.0, CHCl<sub>3</sub>); IR (neat, cm<sup>-1</sup>): 1115, 1263, 1709, 2930, 3455; <sup>1</sup>H NMR (500 MHz, CDCl<sub>3</sub>, HH-COSY, HSQC, HMBC): δ 4.63 (d, *J* = 3.4 Hz, 1H, H-1), 4.23 (q, *J* = 6.4 Hz, 1H, H-5), 4.17 (ddd, *J* = 11.5, 4.9, 3.5 Hz, 1H, H-2), 3.95 (s, 1H, 4-OH), 3.50 (s, 3H, CH<sub>3</sub> OMe), 2.32 (t, *J* = 11.9 Hz, 1H, H-3), 2.25 (s, 3H, H-8), 1.60 (ddd, *J* = 12.3, 4.9, 0.9 Hz, 1H, H-3), 0.96 (d, *J* = 6.5 Hz, 3H, H-6), 0.89 (s, 9H, C(CH<sub>3</sub>)<sub>3</sub>), 0.09 (s, 3H, SiCH<sub>3</sub>), 0.08 (1s, 3H, SiCH<sub>3</sub>); <sup>13</sup>C NMR (126 MHz, CDCl<sub>3</sub>, HSQC, HMBC): δ 208.5 (C-7), 100.0 (C-1), 81.1 (C-4), 66.0 (C-2), 65.3 (C-

5), 55.9 (CH<sub>3</sub> OMe), 36.4 (C-3), 25.9 (C(CH<sub>3</sub>)<sub>3</sub>), 24.5 (C-8), 18.3 (C(CH<sub>3</sub>)<sub>3</sub>), 14.1 (C-6), -4.5 (SiCH<sub>3</sub>), -4.6 (SiCH<sub>3</sub>); HRMS: [M+Na]<sup>+</sup> calcd for C<sub>15</sub>H<sub>30</sub>O<sub>5</sub>SiNa 341.1759, found 341.1760.

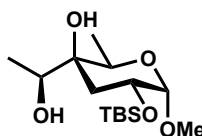

**Methyl 2-*O*-*tert*-butyldimethylsilyl- $\alpha$ -D-yersinioside (S21).** A solution of ZnBH<sub>4</sub> was made by dissolving ZnCl (572 mg, 4.2 mmol, 4.2 eq.) and NaBH<sub>4</sub> (397 mg, 10.5 mmol, 10.5 eq.) in THF (8.4 mL, 0.5 M) at 0 °C. This solution was stirred for 1 h at 0 °C. A solution of glycoside **S20** (325 mg, 1.0 mmol) in THF (20 mL, 50 mM) was cooled to 0 °C and the ZnBH<sub>4</sub> solution was added. The reaction mixture was stirred for 24 h at room temperature and quenched with sat. NH<sub>4</sub>Cl. The aqueous layer was extracted with EtOAc (2x), followed by washing the combined organic layers with brine. The organic phase was dried over MgSO<sub>4</sub>, filtered, and concentrated *in vacuo*. Purification by flash column chromatography (80:20 → 60:40, pentane:EtOAc) afforded the title compound (275 mg, 860  $\mu$ mol, 86%) as a colorless oil. TLC: R<sub>f</sub> 0.4 (pentane:EtOAc, 6:4, v:v); [ $\alpha$ ]<sub>D</sub><sup>20</sup> 40.9° (c 1.0, CHCl<sub>3</sub>); IR (neat, cm<sup>-1</sup>): 1263, 2930, 3424; <sup>1</sup>H NMR (400 MHz, CDCl<sub>3</sub>, HH-COSY, HSQC):  $\delta$  4.54 (d, *J* = 3.7 Hz, 1H, H-1), 4.06 (q, *J* = 5.9, 5.1 Hz, 1H, H-5), 4.03 (ddd, *J* = 9.0, 6.3, 4.4 Hz, 1H, H-2), 3.68 (m, *J* = 13.5, 6.6 Hz, 1H, H-7), 3.43 (s, 3H, CH<sub>3</sub> OMe), 2.38 (s, 1H, 4-OH), 2.12 (s, 1H, 7-OH), 1.89 (m, 1H, H-3), 1.59 (ddd, *J* = 12.7, 5.3, 0.9 Hz, 1H, H-3), 1.22 (d, *J* = 6.6 Hz, 3H, H-8), 1.19 (d, *J* = 6.5 Hz, 3H, H-6), 0.90 (s, 9H, C(CH<sub>3</sub>)<sub>3</sub>), 0.09 (s, 6H, SiCH<sub>3</sub>, SiCH<sub>3</sub>); <sup>13</sup>C NMR (101 MHz, CDCl<sub>3</sub>, HSQC):  $\delta$  99.6 (C-1), 74.9 (C-4), 72.1 (C-7), 67.0 (C-2), 65.7 (C-5), 55.6 (CH<sub>3</sub> OMe), 35.4 (C-3), 26.0 (C(CH<sub>3</sub>)<sub>3</sub>), 18.4 (C(CH<sub>3</sub>)<sub>3</sub>), 17.2 (C-8), 14.5 (C-6), -4.5 (SiCH<sub>3</sub>), -4.5 (SiCH<sub>3</sub>); HRMS: [M+Na]<sup>+</sup> calcd for C<sub>15</sub>H<sub>32</sub>O<sub>5</sub>SiNa 343.1916, found 343.1917.

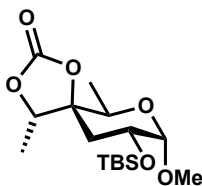

**Methyl 2-*O*-*tert*-butyldimethylsilyl-4,7-*O*-carbonate- $\alpha$ -D-yersinioside (S22).** Compound **S21** (270 mg, 840  $\mu$ mol) was dissolved in dry DCM (1 mL, 0.4 M) and pyridine (0.5 mL, 6.3 mmol, 7.5 eq.) and cooled on ice. While stirring, triphosgene (124 mg, 0.42 mmol, 0.5 eq.) dissolved in 1.1 mL dry DCM was added dropwise and the mixture was stirred at 0 °C for 16 h. Upon full conversion, the reaction was quenched with ice-cooled sat. aq. NH<sub>4</sub>Cl and diluted with EtOAc. The aqueous layer was extracted twice with EtOAc followed by washing the combined organic layers with brine. Subsequently, the organic layer was dried over MgSO<sub>4</sub>, filtered, and concentrated *in vacuo* to yield the crude product. Flash column chromatography (95:5 → 80:20; pentane:EtOAc) yielded the title compound (226 mg, 650  $\mu$ mol, 78%) as a white solid. TLC: R<sub>f</sub> 0.7 (pentane:EtOAc, 8:2, v:v); [ $\alpha$ ]<sub>D</sub><sup>20</sup> 67.0° (c 1.0, CHCl<sub>3</sub>); IR (neat, cm<sup>-1</sup>): 1007, 1054, 1066, 1088, 1812, 2929; <sup>1</sup>H NMR (500 MHz, CDCl<sub>3</sub>, HH-COSY, HSQC, NOESY)  $\delta$  4.55 (d, *J* = 3.4 Hz, 1H, H-1), 4.34 (q, *J* = 6.9 Hz, 1H, H-7), 4.05 (ddd, *J* = 11.6, 5.0, 3.5 Hz, 1H, H-2), 3.90 (q, *J* = 6.3 Hz, 1H, H-5), 3.44 (s, 3H, OCH<sub>3</sub>), 2.07 (dd, *J* = 13.5, 11.7 Hz, 1H, H-3), 1.84 (dd, *J* = 13.5, 4.9 Hz, 1H, H-3), 1.44 (d, *J* = 6.9 Hz, 3H, H-8), 1.28 (d, *J* = 6.4 Hz, 3H, H-6), 0.89 (s, 9H, SiC(CH<sub>3</sub>)<sub>3</sub>), 0.08 (s, 6H, SiCH<sub>3</sub>, SiCH<sub>3</sub>). <sup>13</sup>C NMR (126 MHz, CDCl<sub>3</sub>)  $\delta$  154.2 (O(C=O)O), 99.0 (C-1), 85.0 (C-4), 81.5 (C-7), 66.0 (C-2), 64.6 (C-5), 55.9 (OCH<sub>3</sub>), 36.4 (C-3), 25.8 (SiC(CH<sub>3</sub>)<sub>3</sub>), 18.2 (SiC(CH<sub>3</sub>)<sub>3</sub>), 14.7 (C-6), 13.1 (C-8), -4.6 (SiCH<sub>3</sub>), -4.6 (SiCH<sub>3</sub>); HRMS: [M+Na]<sup>+</sup> calcd for C<sub>16</sub>H<sub>30</sub>O<sub>6</sub>SiNa 369.1709, found 369.1710.

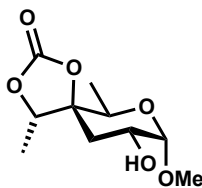

**Methyl 4,7-O-carbonate- $\alpha$ -D-yersinioside (S23).** To a stirred solution of **S22** (230 mg, 660  $\mu$ mol) in MeOH (19.4 mL, 0.034 M) was added a 6 M aq. HCl solution (1.1 mL, 6.6 mmol, 10 eq.). Upon full conversion, the mixture was neutralized by addition of Amberlite IRA-67 (Sigma Aldrich Amberlite IRA-67 free base, pre-washed with MeOH), filtered, and concentrated under reduced pressure to yield the crude product. Flash column chromatography (50:50  $\rightarrow$  0:100; pentane:EtOAc) yielded the title compound (139.3 mg, 0.6 mmol, 91%) as a white solid. TLC:  $R_f$  0.1 (pentane:EtOAc, 1:1, v:v);  $[\alpha]_D^{20}$  125.2° (c 1.0, CHCl<sub>3</sub>); IR (neat, cm<sup>-1</sup>): 1008, 1051, 1063, 1201, 1788, 1807, 3460; <sup>1</sup>H NMR (500 MHz, CDCl<sub>3</sub>, HH-COSY, HSQC):  $\delta$  4.68 (d,  $J$  = 3.7 Hz, 1H, H-1), 4.36 (q,  $J$  = 6.9 Hz, 1H, H-7), 3.97 (dddd,  $J$  = 11.4, 10.2, 5.1, 3.7 Hz, 1H, H-2), 3.87 (q,  $J$  = 6.3 Hz, 1H, H-5), 3.46 (s, 3H, CH<sub>3</sub> OCH<sub>3</sub>), 2.04 (dd,  $J$  = 13.4, 5.1 Hz, 1H, H-3), 1.98 (d,  $J$  = 10.2 Hz, 1H, 2-OH), 1.90 (dd,  $J$  = 13.4, 11.5 Hz, 1H, H-3), 1.45 (d,  $J$  = 6.9 Hz, 3H, H-8), 1.29 (d,  $J$  = 6.4 Hz, 2H, H-6); <sup>13</sup>C NMR (126 MHz, CDCl<sub>3</sub>):  $\delta$  154.1 (O(C=O)O), 98.1 (C-1), 84.6 (C-4), 81.6 (C-7), 65.0 (C-2), 64.8 (C-5), 55.8 (CH<sub>3</sub> OCH<sub>3</sub>), 36.4 (C-3), 14.8 (C-6), 13.1 (C-8); HRMS:  $[M+Na]^+$  calcd for C<sub>10</sub>H<sub>16</sub>O<sub>6</sub>Na 255.0845, found 255.0845.

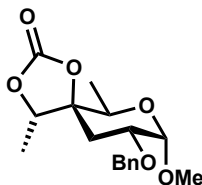

**Methyl 2-O-benzyl-4,7-O-carbonate- $\alpha$ -D-yersinioside (S24).** To a stirred solution of **S23** (251 mg, 1.1 mmol) in dioxane (10.8 mL, 0.1 M) was added benzyl 2,2,2-trichloroacetimidate (0.4 mL, 2.2 mmol, 2.0 eq.) followed by the addition of TfOH (19.1  $\mu$ L, 216  $\mu$ mol, 0.2 eq.). After stirring for 60 min at room temperature the reaction was quenched by addition of sat. aq. NaHCO<sub>3</sub> and diluted with EtOAc. The aqueous layer was extracted twice with EtOAc followed by washing the combined organic layers with H<sub>2</sub>O, sat. aq. NaHCO<sub>3</sub> and brine, respectively. Subsequently, the organic layer was dried over MgSO<sub>4</sub>, filtered, and concentrated *in vacuo* to yield the crude product. Flash column chromatography (80:20  $\rightarrow$  50:50; pentane:EtOAc) yielded the title compound (354 mg, 1.1 mmol, *quant.*) as a white solid. TLC:  $R_f$  0.5 (pentane:EtOAc, 1:1, v:v);  $[\alpha]_D^{20}$  55.9° (c 1.0, CHCl<sub>3</sub>); IR (neat, cm<sup>-1</sup>): 1008, 1052, 1065, 1086, 1206, 1273, 1727, 1792, 1807; <sup>1</sup>H NMR (500 MHz, CDCl<sub>3</sub>, HH-COSY, HSQC):  $\delta$  7.38 – 7.27 (m, 5H, CH<sub>arom</sub>), 4.65 (d,  $J$  = 3.3 Hz, 1H, H-1), 4.61 (d,  $J$  = 12.1 Hz, 1H, CHH Bn), 4.56 (d,  $J$  = 12.1 Hz, 1H, CHH Bn), 4.33 (q,  $J$  = 6.9 Hz, 1H, H-7), 3.89 (q,  $J$  = 6.3 Hz, 1H, H-5), 3.81 (ddd,  $J$  = 11.7, 5.0, 3.4 Hz, 1H, H-2), 3.41 (s, 3H, CH<sub>3</sub> OCH<sub>3</sub>), 2.07 (dd,  $J$  = 13.4, 11.8 Hz, 1H, H-3), 1.98 (dd,  $J$  = 13.5, 5.0 Hz, 1H, H-3), 1.44 (d,  $J$  = 6.9 Hz, 3H, H-8), 1.26 (d,  $J$  = 6.4 Hz, 3H, H-6); <sup>13</sup>C NMR (126 MHz, CDCl<sub>3</sub>, HSQC):  $\delta$  154.1 (O(C=O)O), 137.8 (C<sub>q-arom</sub>), 128.7, 128.2, 128.0 (CH<sub>arom</sub>), 96.9 (C-1), 84.8 (C-4), 81.5 (C-7), 71.8 (CH<sub>2</sub> Bn), 71.6 (C-2), 64.8 (C-5), 55.7 (CH<sub>3</sub> OCH<sub>3</sub>), 33.6 (C-3), 14.8 (C-6), 13.1 (C-8); HRMS:  $[M+Na]^+$  calcd for C<sub>17</sub>H<sub>22</sub>O<sub>6</sub>Na 345.1314, found 345.1316.

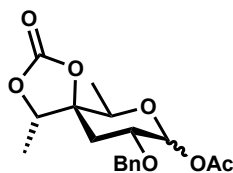

**Acetyl 2-O-benzyl-4,7-O-carbonate-D-yersinioside (S25).** Compound **S24** (83 mg, 260  $\mu$ mol) was dissolved in Ac<sub>2</sub>O (4.7 mL, 0.05 M) and cooled on ice. Subsequently, H<sub>2</sub>SO<sub>4</sub> (28  $\mu$ L, 0.5 mmol, 2.0 eq.) was dissolved in 0.5 mL Ac<sub>2</sub>O and added dropwise to the mixture. After stirring the solution for exactly 2 min, sat. aq. NaHCO<sub>3</sub> and EtOAc were added dropwise and stirred for another 15 min. The aqueous layer was extracted twice with EtOAc followed by washing the combined organic layers with H<sub>2</sub>O, sat.

aq. NaHCO<sub>3</sub> and brine, respectively. Subsequently, the organic layer was dried over MgSO<sub>4</sub>, filtered, and concentrated *in vacuo* to yield the crude product. Flash column chromatography (80:20 → 50:50; pentane:EtOAc) yielded the title compound (89 mg, 254 μmol, 98%, α:β; 66:34) as a white solid. TLC: R<sub>f</sub> 0.5 (pentane:EtOAc, 1:1, v:v); IR (neat, cm<sup>-1</sup>): 1009, 1064, 1091, 1227, 1751, 1805; Data of the major stereoisomer (α-anomer): <sup>1</sup>H NMR (500 MHz, CDCl<sub>3</sub>, HH-COSY, HSQC): δ 7.39 – 7.24 (m, 5H, CH<sub>arom</sub>), 6.33 (d, *J* = 3.3 Hz, 1H, H-1), 4.63 (d, *J* = 11.6 Hz, 1H, CHH Bn), 4.52 (d, *J* = 11.6 Hz, 1H, CHH Bn), 4.38 (q, *J* = 6.9 Hz, 1H, H-7), 4.00 (q, *J* = 6.3 Hz, 1H, H-5), 3.93 (ddd, *J* = 9.9, 6.9, 3.4 Hz, 1H, H-2), 2.16 (s, 3H, COCH<sub>3</sub>), 2.10 – 2.06 (m, 2H, H-3, H-3), 1.47 (d, *J* = 6.9 Hz, 3H, H-8), 1.28 (d, *J* = 6.3 Hz, 3H, H-6); <sup>13</sup>C NMR (126 MHz, CDCl<sub>3</sub>, HSQC): δ 169.4 (C=O OAc), 153.8 (O(C=O)O), 137.4 (C<sub>q-arom</sub>), 128.7, 128.7, 128.2, 127.9, 127.7 (CH<sub>arom</sub>), 88.6 (C-1), 81.5 (C-7), 72.0 (CH<sub>2</sub> Bn), 70.4 (C-2), 67.5 (C-5), 33.9 (C-3), 21.1 (CH<sub>3</sub> Ac), 14.9 (C-6), 13.2 (C-8); Diagnostic signals of the minor stereoisomer (β-anomer): <sup>1</sup>H NMR (500 MHz, CDCl<sub>3</sub>, HH-COSY, HSQC): δ 5.60 (d, *J* = 7.3 Hz, 1H, H-1), 4.47 (q, *J* = 6.8 Hz, 1H, H-7), 3.75 (ddd, *J* = 10.2, 7.2, 5.1 Hz, 1H, H-2), 2.34 (dd, *J* = 14.3, 5.1 Hz, 1H, H-3), 2.12 (s, 3H, COCH<sub>3</sub>), 1.85 (dd, *J* = 14.3, 10.2 Hz, 1H, H-3), 1.45 (d, *J* = 6.9 Hz, 3H, H-8), 1.35 (d, *J* = 6.3 Hz, 3H, H-6); <sup>13</sup>C NMR (126 MHz, CDCl<sub>3</sub>, HSQC): δ 169.6 (C=O OAc), 153.7 (O(C=O)O), 137.7 (C<sub>q-arom</sub>), 94.4 (C-1), 80.8 (C-7), 73.1 (CH<sub>2</sub> Bn), 72.8 (C-2), 72.6 (C-5), 37.6 (C-3), 21.2 (CH<sub>3</sub> Ac), 15.4 (C-6), 13.3 (C-8); HRMS: [M+Na]<sup>+</sup> calcd for C<sub>18</sub>H<sub>22</sub>O<sub>7</sub>Na 373.1263, found 373.1259.

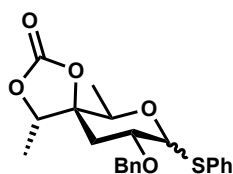

**Phenyl 2-O-benzyl-4,7-O-carbonate-1-thio-D-yersinioside (23).** Compound **S25** (347 mg, 990 μmol) was dissolved in DCM (9.9 mL, 0.1 M) and thiophenol (111 μL, 1.1 mmol, 1.1 eq.) was added. Subsequently, the solution was cooled to -80 °C and BF<sub>3</sub>·OEt<sub>2</sub> (147 μL, 1.2 mmol, 1.2 eq.) was added dropwise, the solution was stirred for 16 h while attaining to 0 °C. Upon full conversion, the reaction was quenched with sat. aq. NaHCO<sub>3</sub> and diluted with EtOAc. The aqueous layer was extracted twice with EtOAc followed by washing the combined organic layers with H<sub>2</sub>O, sat. aq. NaHCO<sub>3</sub> and brine, respectively. Subsequently, the organic layer was dried over MgSO<sub>4</sub>, filtered, and concentrated *in vacuo* to yield the crude product. Flash column chromatography (90:10 → 60:40; pentane:EtOAc) yielded the title compound (383 mg, 956 μmol, 97%, α:β; 56:44) as a colorless oil. TLC: R<sub>f</sub> 0.2 (pentane:EtOAc, 9:1, v:v); IR (neat, cm<sup>-1</sup>): 693, 1009, 1069, 1199, 1793, 1805; Data of the major stereoisomer (α-anomer): <sup>1</sup>H NMR (500 MHz, CDCl<sub>3</sub>, HH-COSY, HSQC): δ 7.64 – 7.23 (m, 10H, CH<sub>arom</sub>), 5.68 (d, *J* = 4.6 Hz, 1H, H-1), 4.71 (d, *J* = 11.5 Hz, 1H, CHH Bn), 4.55 (d, *J* = 11.5 Hz, 1H, H-3 CHH Bn), 4.45 (q, *J* = 6.3 Hz, 1H, H-5), 4.39 (q, *J* = 6.6 Hz, 1H, H-7), 4.15 (dt, *J* = 11.3, 4.9 Hz, 1H, H-2), 2.16 – 1.98 (m, 2H, H-3, H-3), 1.51 (d, *J* = 6.9 Hz, 3H, H-8), 1.28 (d, *J* = 6.3 Hz, 3H, H-6); <sup>13</sup>C NMR (126 MHz, CDCl<sub>3</sub>): δ 154.0 (O(C=O)O), 137.7, 133.1 (C<sub>q-arom</sub>), 132.6, 131.4, 129.2, 129.1, 128.7, 128.7, 128.3, 128.2, 128.1, 127.4 (CH<sub>arom</sub>), 86.6 (C-1), 84.5 (C-4), 81.6 (C-7), 71.5 (C-2), 71.5 (CH<sub>2</sub> Bn), 66.1 (C-5), 35.8 (C-3), 14.8 (C-6), 13.3 (C-8); Diagnostic signals of the minor stereoisomer (β-anomer): <sup>1</sup>H NMR (500 MHz, CDCl<sub>3</sub>, HH-COSY, HSQC): δ 4.70 (d, *J* = 11.3 Hz, 1H, CHH Bn), 4.58 (d, *J* = 9.3 Hz, 1H, H-1), 4.53 (d, *J* = 11.3 Hz, 1H, CHH Bn), 4.35 (q, *J* = 6.7 Hz, 1H, H-7), 3.72 – 3.65 (m, 2H, H-2, H-5), 2.33 (dd, *J* = 14.1, 5.0 Hz, 1H, H-3), 1.77 (dd, *J* = 14.1, 10.6 Hz, 1H, H-3), 1.42 (d, *J* = 6.9 Hz, 3H, H-8), 1.37 (d, *J* = 6.2 Hz, 3H, H-6); <sup>13</sup>C NMR (126 MHz, CDCl<sub>3</sub>, HSQC): δ 153.9 (O(C=O)O), 137.3, 133.9 (C<sub>q-arom</sub>), 88.6 (C-1), 84.2 (C-4), 80.9 (C-7), 75.3 (C-2/C-5), 73.2 (CH<sub>2</sub> Bn), 72.5 (C-2/C-5), 39.9 (C-3), 15.5 (C-6), 13.1 (C-8); HRMS: [M+Na]<sup>+</sup> calcd for C<sub>22</sub>H<sub>24</sub>O<sub>5</sub>SNa 423.1242, found 423.1237.

## Synthesis of compound 24 and S36

**Scheme S4.** Synthesis of compound **24** and **S36**.

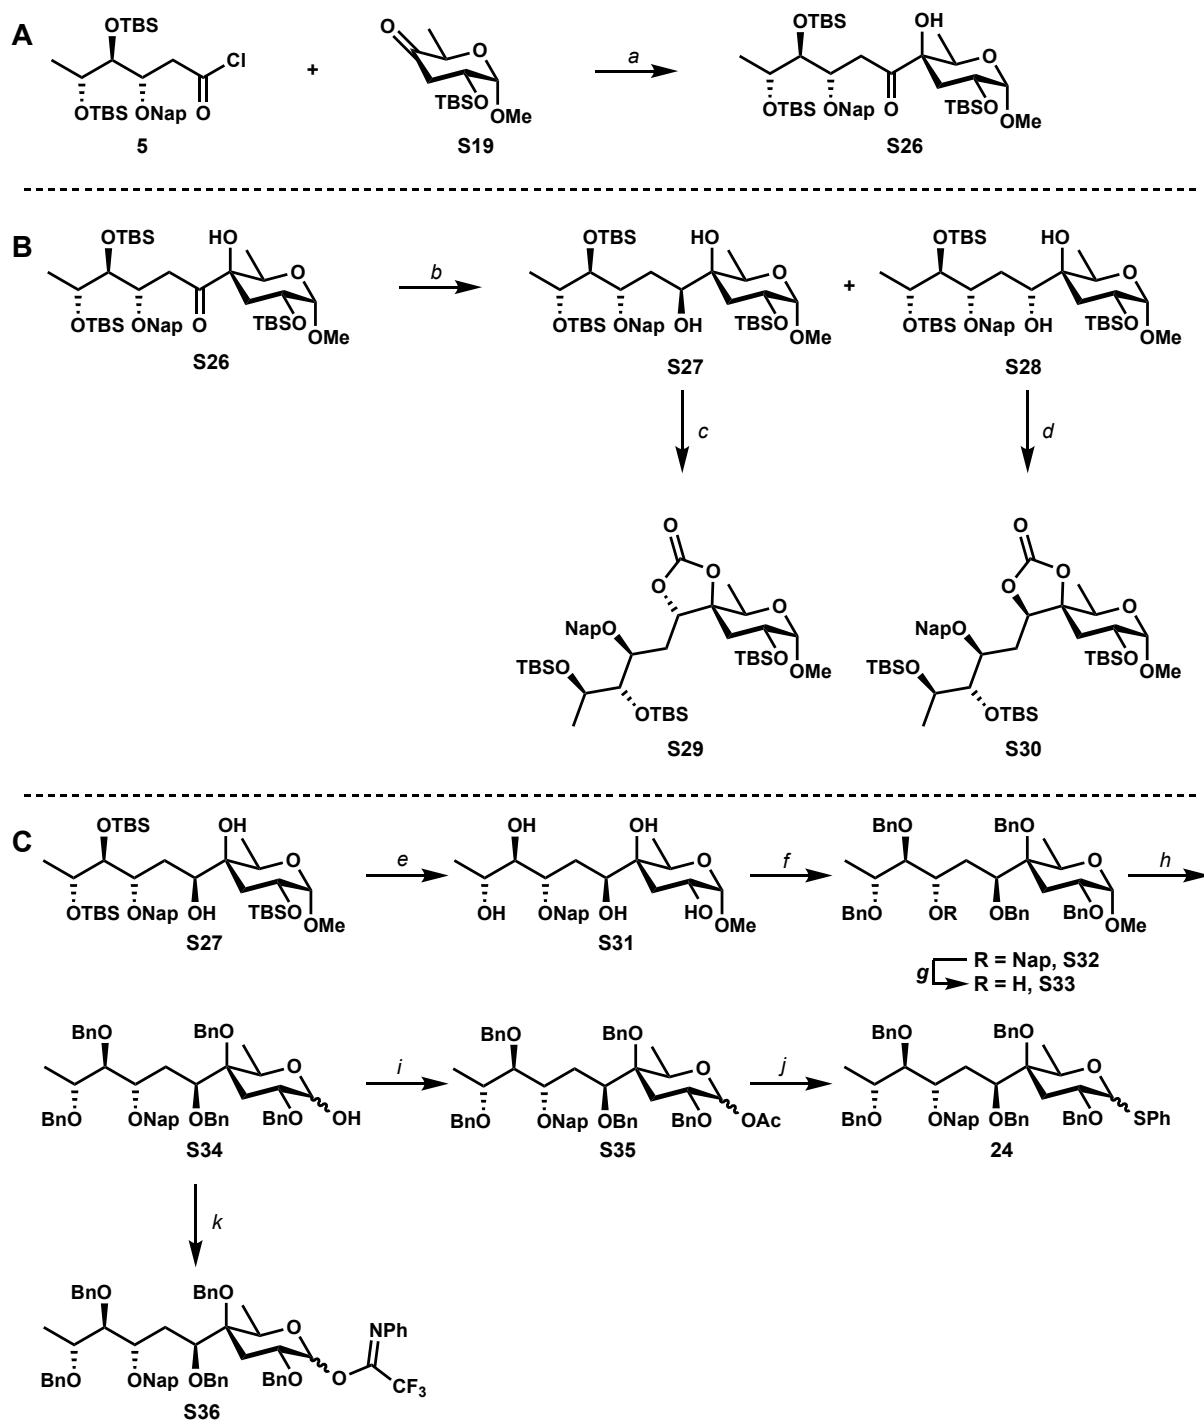

*Reagents and conditions:* a)  $\text{Sml}_2$ , THF, 40 °C, 15 min (70%); b)  $\text{Zn}(\text{BH}_4)_2$ , THF (82%, and 10% for the C-7 epimer); c) and d)  $\text{COCl}_2$ ,  $\text{Et}_3\text{N}$ , THF (79% and 48% for the C-7 epimer); e) 6 M HCl, MeOH (*quant.*); f) BnBr, NaH, DMF (74%); g) DDQ, DCM/MeOH 4:1 (70%); h)  $\text{SrCl}_2 \cdot \text{H}_2\text{O}$ , aq. HCOOH 80%, dioxane (68%); i)  $\text{Ac}_2\text{O}$ , pyridine (85%); j) thiophenol,  $\text{BF}_3 \cdot \text{OEt}_2$ , DCM (61%); k) 2,2,2-trifluoro-*N*-phenylacetimidoyl chloride,  $\text{CsCO}_3$ , acetone (85%).

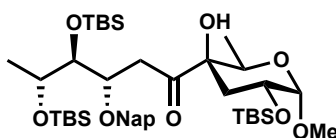

**Methyl 2,10,11-tris-*O*-(*tert*-butyldimethylsilyl)-9-*O*-2-methylnaphthalene- $\alpha$ -D-galacto-hexapyranoside (S26).**

Acid **5** (1.06 g, 2.0 mmol) was dissolved in dry THF (20 mL, 0.1 M). This solution was cooled to 0 °C while stirring, pyridine (242  $\mu$ L, 3.0 mmol, 1.5 eq.) and oxalyl chloride (220  $\mu$ L, 2.6 mmol, 1.3 eq.) were added respectively. The solution was stirred for 30 min on ice after which it was warmed to room temperature over a time span of 15 min. The suspension was diluted with pentane and filtered into a flask containing ketone **S19** (457 mg, 1.67 mmol, 0.8 eq.), resulting in a clear liquid which was concentrated *in vacuo* to yield the crude acid chloride **5** combined with ketone **S19** as a colorless oil. While gently stirring, a constant gas flow of nitrogen was applied for 20 min after which the mixture was heated to 40 °C followed by the addition of a solution of samarium(II)iodide (0.1 M) in THF (59 mL, 5.85 mmol, 3.5 eq.). After 10 min the heat source was removed and the solution was quenched with air and diluted with EtOAc, aq. 1.0 M HCl and stirred for 30 min. The aqueous layer was extracted with EtOAc (3x) followed by washing the combined organic layers with sat. aq. Na<sub>2</sub>S<sub>2</sub>O<sub>3</sub>. Subsequently, the organic layer was dried over MgSO<sub>4</sub>, filtered, and concentrated *in vacuo* to yield the crude product as a colorless oil. Flash column chromatography (97:3  $\rightarrow$  95:5; pentane:Et<sub>2</sub>O) yielded the title compound (850 mg, 1.08 mmol, 65% based on **S19**) as a colorless oil. TLC: R<sub>f</sub> 0.5 (pentane:Et<sub>2</sub>O, 9:1, v:v); [ $\alpha$ ]<sub>D</sub><sup>20</sup> 15.7° (c 1.0, CHCl<sub>3</sub>); IR (neat, cm<sup>-1</sup>): 775, 835, 1112, 1253, 1471, 1707, 2856, 2929; <sup>1</sup>H NMR (400 MHz, CDCl<sub>3</sub>, HH-COSY, HSQC):  $\delta$  7.83 – 7.65 (m, 4H, CH<sub>arom</sub>), 7.48 – 7.30 (m, 3H, CH<sub>arom</sub>), 4.70 (d, *J* = 11.6 Hz, 1H, CHH Nap), 4.59 (m, 1H, CHH Nap), 4.57 (s, 1H, H-1), 4.33 (dt, *J* = 10.0, 2.5 Hz, 1H, H-9), 4.23 (q, *J* = 6.4 Hz, 1H, H-5), 4.11 (ddd, *J* = 11.5, 4.8, 3.4 Hz, 1H, H-2), 3.94 (s, 1H, 4-OH), 3.77 – 3.67 (m, 2H, H-10, H-11), 3.45 (s, 3H, CH<sub>3</sub> OMe), 3.29 (dd, *J* = 17.1, 10.0 Hz, 1H, H-8), 2.47 – 2.35 (m, 2H, H-8, H-3), 1.50 (dd, *J* = 12.3, 4.6 Hz, 1H, H-3), 1.18 (d, *J* = 5.8 Hz, 3H, H-12), 0.93 (d, *J* = 2.6 Hz, 3H, H-6) 0.92 – 0.78 (m, 27H, C(CH<sub>3</sub>)<sub>3</sub>, C(CH<sub>3</sub>)<sub>3</sub>, C(CH<sub>3</sub>)<sub>3</sub>), 0.14 – 0.07 (m, 18H, SiCH<sub>3</sub>, SiCH<sub>3</sub>, SiCH<sub>3</sub>, SiCH<sub>3</sub>, SiCH<sub>3</sub>, SiCH<sub>3</sub>); <sup>13</sup>C NMR (101 MHz, CDCl<sub>3</sub> HSQC):  $\delta$  210.2 (C-7), 135.7, 133.3, 133.0 (C<sub>q-arom</sub>), 128.0, 128.0, 127.8, 126.4, 126.1, 126.0, 125.8 (CH<sub>arom</sub>), 100.1 (C-1), 81.4 (C-4), 78.2 (C-10/C-11), 77.0 (C-9), 72.9 (CH<sub>2</sub> Nap), 70.0 (C-11/C-10), 66.2 (C-2), 65.0 (C-5), 55.7 (CH<sub>3</sub> OMe), 38.3 (C-8), 36.1 (C-3), 26.2 (C(CH<sub>3</sub>)<sub>3</sub>), 26.0 (C(CH<sub>3</sub>)<sub>3</sub>), 25.9 (C(CH<sub>3</sub>)<sub>3</sub>), 20.5 (C-12), 18.5 (C(CH<sub>3</sub>)<sub>3</sub>), 18.2 (C(CH<sub>3</sub>)<sub>3</sub>), 18.2 (C(CH<sub>3</sub>)<sub>3</sub>), 14.3 (C-6), -4.0 (SiCH<sub>3</sub>), -4.1 (SiCH<sub>3</sub>), -4.2 (SiCH<sub>3</sub>), -4.6 (SiCH<sub>3</sub>), -4.6 (SiCH<sub>3</sub>), -4.6 (SiCH<sub>3</sub>); HRMS: [M+Na]<sup>+</sup> calcd for C<sub>42</sub>H<sub>74</sub>O<sub>8</sub>Si<sub>3</sub>Na 813.4589, found 813.4598.

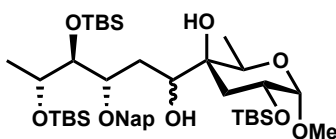

**Methyl 2,10,11-tris-*O*-(*tert*-butyldimethylsilyl)-9-*O*-2-methylnaphthalene- $\alpha$ -D-caryophylloside (S27) and Methyl 7-*epi*-2,10,11-tris-*O*-(*tert*-butyldimethylsilyl)-9-*O*-2-methylnaphthalene- $\alpha$ -D-caryophylloside (S28).**

A Zn(BH<sub>4</sub>)<sub>2</sub> solution was prepared by dissolving anhydrous ZnCl<sub>2</sub> (209 mg, 1.54 mmol) in dry THF (2.95 mL), at 0 °C NaBH<sub>4</sub> (148 mg, 3.9 mmol) was added and the solution was stirred for 18 h. **S26** (47.4 mg, 60  $\mu$ mol) was dissolved in dry THF (2.4 mL, 0.025 M) after which it was cooled on ice, 0.6 mL of the Zn(BH<sub>4</sub>)<sub>2</sub> solution (0.31 mmol, 5.2 eq.) was added. The solution was led to warm to room temperature and stirred for 18 h. The reaction was quenched with sat. aq. NH<sub>4</sub>Cl and diluted with EtOAc and brine, the aqueous layer was extracted with EtOAc (3x) followed by washing the combined organic layers with H<sub>2</sub>O, sat. aq. NaHCO<sub>3</sub> and brine, respectively. Subsequently, the organic layer was dried over MgSO<sub>4</sub>, filtered, and concentrated *in vacuo* to yield the crude products as a separable diastereomeric mixture. Flash column chromatography (95:5  $\rightarrow$  90:10; pentane:Et<sub>2</sub>O) yielded the C-7 epimer **S28** and the caryophyllose **S27** in an 11:89 ratio respectively. Yielding caryophyllose **S27** (39 mg, 49  $\mu$ mol, 82%) and the C-7 epimer **S28** (5 mg, 6  $\mu$ mol, 10%) both as colorless oils. TLC: R<sub>f</sub> 0.2 and 0.5 for the caryophyllose **S27** and C-7 epimer **S28** respectively (pentane:EtOAc, 9:1, v:v);



Data of the major stereoisomer caryophyllose **S27**:  $[\alpha]_D^{20}$  13.3° (c 1.0, CHCl<sub>3</sub>); IR (neat, cm<sup>-1</sup>): 775, 835, 1056, 1104, 1252, 2928, 3483; <sup>1</sup>H NMR (400 MHz, CDCl<sub>3</sub>, HH-COSY, HSQC): δ 8.01 – 7.65 (m, 4H, CH<sub>arom</sub>), 7.47 (m, 3H, CH<sub>arom</sub>), 4.79 (d, *J* = 11.9 Hz, 1H, CHH Nap), 4.64 (d, *J* = 11.9 Hz, 1H, CHH Nap), 4.52 (d, *J* = 3.6 Hz, 1H, H-1), 4.12 – 3.99 (m, 2H, H-2, H-5), 3.92 – 3.79 (m, 2H, H-9, H-11), 3.75 (dd, *J* = 5.5, 3.6 Hz, 1H, H-10), 3.67 (d, *J* = 10.4 Hz, 1H, H-7), 3.39 (s, 3H, CH<sub>3</sub> OMe), 2.35 (d, *J* = 4.2 Hz, 1H, 4-OH), 2.28 (s, 1H, 7-OH), 2.00 – 1.91 (m, 2H, H-3, H-8), 1.66 – 1.54 (m, 2H, H-3, H-8), 1.17 (d, *J* = 6.1 Hz, 3H, H-12), 1.11 (d, *J* = 6.5 Hz, 3H, H-6), 0.93 – 0.85 (m, 27H, C(CH<sub>3</sub>)<sub>3</sub>, C(CH<sub>3</sub>)<sub>3</sub>, C(CH<sub>3</sub>)<sub>3</sub>), 0.14 – 0.02 (m, 18H, SiCH<sub>3</sub>, SiCH<sub>3</sub>, SiCH<sub>3</sub>, SiCH<sub>3</sub>, SiCH<sub>3</sub>, SiCH<sub>3</sub>); <sup>13</sup>C NMR (101 MHz, CDCl<sub>3</sub> HSQC): δ 135.9, 133.4, 133.1 (C<sub>q-arom</sub>), 128.3, 128.0, 127.8, 126.8, 126.3, 126.1, 126.0 (CH<sub>arom</sub>), 99.7 (C-1), 79.0 (C-10), 77.6 (C-11), 74.7 (C-4), 72.4 (C-7), 72.1 (CH<sub>2</sub> Nap), 69.8 (C-9), 67.1 (C-2), 66.0 (C-5), 55.4 (CH<sub>3</sub> OMe), 34.5 (C-3/C-8), 31.4 (C-8/C-3), 26.3 (C(CH<sub>3</sub>)<sub>3</sub>), 26.1 (C(CH<sub>3</sub>)<sub>3</sub>), 26.0 (C(CH<sub>3</sub>)<sub>3</sub>), 20.3 (C-12), 18.5 (C(CH<sub>3</sub>)<sub>3</sub>), 18.4 (C(CH<sub>3</sub>)<sub>3</sub>), 18.2 (C(CH<sub>3</sub>)<sub>3</sub>), 14.1 (C-6), -4.0 (SiCH<sub>3</sub>), -4.0 (SiCH<sub>3</sub>), -4.1 (SiCH<sub>3</sub>), -4.4 (SiCH<sub>3</sub>), -4.4 (SiCH<sub>3</sub>), -4.4 (SiCH<sub>3</sub>); HRMS: [M+Na]<sup>+</sup> calcd for C<sub>42</sub>H<sub>76</sub>O<sub>8</sub>Si<sub>3</sub>Na 815.4746, found 815.4746.

Data of the minor stereoisomer C-7 epimer **S28**:  $[\alpha]_D^{20}$  6.4° (c 1.0, CHCl<sub>3</sub>); IR (neat, cm<sup>-1</sup>): 776, 835, 1052, 1104, 1252, 2928, 3502; <sup>1</sup>H NMR (400 MHz, CDCl<sub>3</sub>, HH-COSY, HSQC): δ 7.87 – 7.74 (m, 4H, CH<sub>arom</sub>), 7.52 – 7.42 (m, 3H, CH<sub>arom</sub>), 4.85 (d, *J* = 11.6 Hz, 1H, CHH Nap), 4.58 (d, *J* = 11.6 Hz, 1H, H-1), 4.55 (m, 1H, CHH Nap), 4.33 (d, *J* = 1.5 Hz, 1H, 7-OH), 4.16 (ddd, *J* = 11.3, 5.2, 3.5 Hz, 1H, H-2), 3.97 (ddd, *J* = 8.9, 3.9, 1.7 Hz, 1H, H-7), 3.76 – 3.69 (m, 2H, H-5, H-10), 3.69 – 3.58 (m, 2H, H-9, H-11), 3.40 (s, 3H, CH<sub>3</sub> OMe), 2.95 (d, *J* = 1.0 Hz, 1H, 4-OH), 1.87 – 1.69 (m, 3H, H-3, H-3, H-8), 1.53 (dd, *J* = 15.1, 3.9 Hz, 1H, H-8), 1.22 (d, *J* = 6.0 Hz, 3H, H-12), 1.08 (d, *J* = 6.5 Hz, 3H, H-6), 0.93 – 0.78 (m, 27H, C(CH<sub>3</sub>)<sub>3</sub>, C(CH<sub>3</sub>)<sub>3</sub>, C(CH<sub>3</sub>)<sub>3</sub>), 0.14 – -0.04 (m, 18H, SiCH<sub>3</sub>, SiCH<sub>3</sub>, SiCH<sub>3</sub>, SiCH<sub>3</sub>, SiCH<sub>3</sub>, SiCH<sub>3</sub>); <sup>13</sup>C NMR (101 MHz, CDCl<sub>3</sub> HSQC): δ 134.8, 133.3, 133.2 (C<sub>q-arom</sub>), 128.6, 128.1, 127.8, 127.4, 126.4, 126.3, 126.1 (CH<sub>arom</sub>), 99.9 (C-1), 80.0 (C-7), 77.9 (C-4), 74.7 (C-10/C-5), 72.2 (C-9/C-11), 72.0 (CH<sub>2</sub> Nap), 69.6 (C-11/C-9), 67.1 (C-2), 66.6 (C-5/C-10), 55.4 (CH<sub>3</sub> OMe), 33.3 (C-3), 30.1 (C-8), 26.3 (C(CH<sub>3</sub>)<sub>3</sub>), 26.1 (C(CH<sub>3</sub>)<sub>3</sub>), 26.0 (C(CH<sub>3</sub>)<sub>3</sub>), 21.6 (C-12), 18.6 (C(CH<sub>3</sub>)<sub>3</sub>), 18.4 (C(CH<sub>3</sub>)<sub>3</sub>), 18.0 (C(CH<sub>3</sub>)<sub>3</sub>), 14.3 (C(CH<sub>3</sub>)<sub>3</sub>), -3.5 (SiCH<sub>3</sub>), -3.6 (SiCH<sub>3</sub>), -4.4 (SiCH<sub>3</sub>), -4.4 (SiCH<sub>3</sub>), -4.5 (SiCH<sub>3</sub>), -4.6 (SiCH<sub>3</sub>); HRMS: [M+Na]<sup>+</sup> calcd for C<sub>42</sub>H<sub>76</sub>O<sub>8</sub>Si<sub>3</sub>Na 815.4746, found 815.4722.

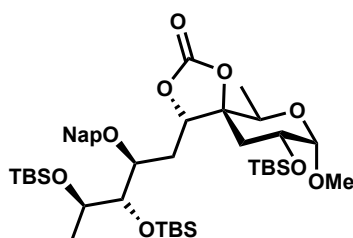

**Methyl 2,10,11-tris-O-(tert-butyldimethylsilyl)-9-O-2-methylnaphthalene-4,7-carbonate- $\alpha$ -D-caryophylloside (S29).** A phosgene solution was prepared by diluting a 20% phosgene in hexane solution (0.95 mL, 1.75 mmol, 5 eq.) with dry THF (1 mL). The caryophyllose **S27** (280 mg, 0.35 mmol) was dissolved in THF (2.5 mL, 0.1 M) and Et<sub>3</sub>N (242  $\mu$ L, 1.75 mmol, 5.0 eq.) and cooled on ice. The phosgene solution was added dropwise, after which the solution was stirred for 1 h at 0 °C followed by 1 h on room temperature. The reaction was quenched by adding 1 mL of sat. aq. NaHCO<sub>3</sub> followed by diluting the mixture with Et<sub>2</sub>O and water. The aqueous layer was extracted with Et<sub>2</sub>O (3x) followed by washing the combined organic layers with H<sub>2</sub>O, sat. aq. NaHCO<sub>3</sub> and brine, respectively. Subsequently, the organic layer was dried over MgSO<sub>4</sub>, filtered, and concentrated *in vacuo* to yield the crude product as a colorless oil. Flash column chromatography (99:1 → 97:3; pentane:EtOAc) yielded the title compound (227 mg, 0.28 mmol, 79%) as a colorless oil. TLC: R<sub>f</sub> 0.2 (pentane:EtOAc, 9:1, v:v);  $[\alpha]_D^{20}$  8.4° (c 0.5, CHCl<sub>3</sub>); IR (neat, cm<sup>-1</sup>): 776, 835, 1059, 1098, 1253, 1812, 2928; <sup>1</sup>H NMR (400 MHz, CDCl<sub>3</sub>, HH-COSY, HSQC, NOESY): δ 7.83 (dt, *J* = 11.6, 4.0 Hz, 4H, CH<sub>arom</sub>), 7.53 – 7.43 (m, 3H, CH<sub>arom</sub>), 4.74 (d, *J* = 11.8 Hz, 1H, CHH Nap), 4.60 (d, *J* = 11.7 Hz, 1H, CHH Nap), 4.52 (d, *J* = 3.2 Hz, 1H, H-1), 4.36 (dd, *J* = 9.6, 3.9 Hz, 1H, H-7), 4.02 (ddd, *J* = 11.5, 4.7, 3.3 Hz, 1H, H-2), 3.84 (p, *J* = 6.1 Hz, 1H, H-11), 3.77 – 3.67 (m, 2H, H-9, H-10), 3.56 (q, *J* = 6.4 Hz, 1H, H-5), 3.34 (s, 3H, CH<sub>3</sub> OMe), 2.08 (ddd, *J* = 15.4, 9.6, 6.2 Hz, 1H, H-8), 2.00 (dd, *J* = 13.2, 11.5 Hz, 1H, H-3), 1.94 – 1.86 (m, 2H, H-3, H-8), 1.12 (d, *J* = 6.2 Hz, 3H, H-12), 1.09 (d, *J* = 6.4 Hz, 3H, H-6), 0.93 – 0.82 (m, 27H, C(CH<sub>3</sub>)<sub>3</sub>, C(CH<sub>3</sub>)<sub>3</sub>, C(CH<sub>3</sub>)<sub>3</sub>), 0.12

– 0.03 (m, 18H, SiCH<sub>3</sub>, SiCH<sub>3</sub>, SiCH<sub>3</sub>, SiCH<sub>3</sub>, SiCH<sub>3</sub>, SiCH<sub>3</sub>); <sup>13</sup>C NMR (101 MHz, CDCl<sub>3</sub> HSQC): δ 153.9 (O(C=O)O), 135.5, 133.4, 133.1 (C<sub>q- arom</sub>), 128.3, 128.1, 127.8, 127.0, 126.3, 126.2, 126.1 (CH<sub>arom</sub>), 99.3 (C-1), 85.3 (C-4), 78.7 (C-7/C-10), 78.7 (C-10/C-7), 77.1 (C-9), 71.9 (CH<sub>2</sub>Nap), 70.1 (C-11), 66.5 (C-5), 66.3 (C-2), 55.7 (CH<sub>3</sub> OMe), 32.8 (C-3), 30.8 (C-8), 26.3 (C(CH<sub>3</sub>)<sub>3</sub>), 26.1 (C(CH<sub>3</sub>)<sub>3</sub>), 25.9 (C(CH<sub>3</sub>)<sub>3</sub>), 19.9 (C-12), 18.5 (C(CH<sub>3</sub>)<sub>3</sub>), 18.3 (C(CH<sub>3</sub>)<sub>3</sub>), 18.3 (C(CH<sub>3</sub>)<sub>3</sub>), 13.2 (C-6), -4.0 (SiCH<sub>3</sub>), -4.0 (SiCH<sub>3</sub>), -4.1 (SiCH<sub>3</sub>), -4.4 (SiCH<sub>3</sub>), -4.5 (SiCH<sub>3</sub>), -4.6 (SiCH<sub>3</sub>); HRMS: [M+Na]<sup>+</sup> calcd for C<sub>43</sub>H<sub>74</sub>O<sub>9</sub>Si<sub>3</sub>Na 841.4538, found 841.4532.

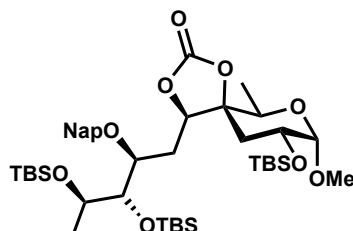

**Methyl 7-epi-2,10,11-tris-O-(tert-butyldimethylsilyl)-9-O-2-methylnaphthalene-4,7-carbonate- $\alpha$ -D-caryophylloside (S30).** A phosgene solution was prepared by diluting a 20% phosgene in hexane solution (265  $\mu$ L, 334  $\mu$ mol, 10 eq.) with dry THF (1.5 mL). The C-7 epimer **S28** (26.5 mg, 33  $\mu$ mol) was dissolved in THF (0.33 mL, 0.1 M) and Et<sub>3</sub>N (90  $\mu$ L, 660  $\mu$ mol, 20 eq.) and cooled on ice. The phosgene solution was added dropwise after which the solution was stirred for 1 h at 0 °C followed by 1 h on room temperature. The reaction was quenched by adding 1 mL of sat. aq. NaHCO<sub>3</sub> followed by diluting the mixture with Et<sub>2</sub>O and water. The aqueous layer was extracted with Et<sub>2</sub>O (3x) followed by washing the combined organic layers with H<sub>2</sub>O, sat. aq. NaHCO<sub>3</sub> and brine, respectively. Subsequently, the organic layer was dried over MgSO<sub>4</sub>, filtered, and concentrated *in vacuo* to yield the crude product as a colorless oil. Flash column chromatography (99:1  $\rightarrow$  97:3; pentane:EtOAc) yielded the title compound (12.9 mg, 16.0  $\mu$ mol, 48%) as a colorless oil. TLC: R<sub>f</sub> 0.3 (pentane:EtOAc, 9:1, v:v); [ $\alpha$ ]<sub>D</sub><sup>20</sup> 32.0° (c 1.0, CHCl<sub>3</sub>); IR (neat, cm<sup>-1</sup>): 776, 835, 1034, 1066, 1086, 1110, 1471, 1809, 2929; <sup>1</sup>H NMR (400 MHz, CDCl<sub>3</sub>, HH-COSY, HSQC, NOESY): δ 7.86 – 7.75 (m, 4H, CH<sub>arom</sub>), 7.52 – 7.37 (m, 3H, CH<sub>arom</sub>), 4.84 (d, *J* = 11.9 Hz, 1H, CHH Nap), 4.58 (d, *J* = 11.8 Hz, 1H, CHH Nap), 4.54 (d, *J* = 3.3 Hz, 1H, H-1), 4.44 – 4.38 (m, 1H, H-7), 4.02 (ddd, *J* = 11.7, 4.9, 3.4 Hz, 1H, H-2), 3.94 – 3.82 (m, 2H, H-9, H-11), 3.70 (m, 2H, H-5, H-10), 3.40 (s, 2H, CH<sub>3</sub> OMe), 2.12 (dd, *J* = 13.5, 11.9 Hz, 1H, H-3), 1.91 – 1.83 (m, 2H, H-3, H-8), 1.76 (dd, *J* = 13.5, 4.8 Hz, 1H, H-8), 1.26 (d, *J* = 6.4 Hz, 3H, H-12), 1.19 (d, *J* = 5.7 Hz, 3H, H-6), 0.97 – 0.79 (m, 27H, C(CH<sub>3</sub>)<sub>3</sub>, C(CH<sub>3</sub>)<sub>3</sub>, C(CH<sub>3</sub>)<sub>3</sub>), 0.19 – 0.03 (m, 18H, SiCH<sub>3</sub>, SiCH<sub>3</sub>, SiCH<sub>3</sub>, SiCH<sub>3</sub>, SiCH<sub>3</sub>, SiCH<sub>3</sub>); <sup>13</sup>C NMR (101 MHz, CDCl<sub>3</sub>, HSQC): δ 154.2 (C-13), 135.6, 133.4, 133.0 (C<sub>q- arom</sub>), 128.3, 128.0, 127.8, 126.4, 126.3, 126.1, 125.7 (CH<sub>arom</sub>), 99.0 (C-1), 85.1 (C-4), 82.4 (C-7), 78.3 (C-5), 77.0 (C-9), 72.6 (CH<sub>2</sub> Nap), 69.7 (C-10), 66.2 (C-2), 64.8 (C-11), 55.6 (CH<sub>3</sub> OMe), 36.3 (C-3), 28.7 (C-8), 26.2 (C(CH<sub>3</sub>)<sub>3</sub>), 26.1 (C(CH<sub>3</sub>)<sub>3</sub>), 26.0 (C(CH<sub>3</sub>)<sub>3</sub>), 20.8 (C-6), 18.5 (C(CH<sub>3</sub>)<sub>3</sub>), 18.4 (C(CH<sub>3</sub>)<sub>3</sub>), 18.2 (C(CH<sub>3</sub>)<sub>3</sub>), 15.0 (C-12), -3.9 (SiCH<sub>3</sub>), -3.9 (SiCH<sub>3</sub>), -4.3 (SiCH<sub>3</sub>), -4.5 (SiCH<sub>3</sub>), -4.5 (SiCH<sub>3</sub>), -4.6 (SiCH<sub>3</sub>); HRMS: [M+Na]<sup>+</sup> calcd for C<sub>43</sub>H<sub>74</sub>O<sub>9</sub>Si<sub>3</sub>Na 841.4538, found 841.4538.

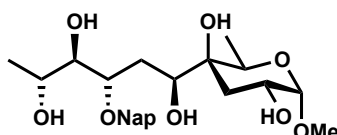

**Methyl 9-O-2-methylnaphthalene- $\alpha$ -D-caryophylloside (S31).** Compound **S30** (400 mg, 0.5 mmol) was dissolved in methanol (15 mL, 0.034 M), a 6 M HCl aq. solution (0.9 mL, 10 eq.) was added and the mixture was stirred for 18 h upon which the reaction was quenched by neutralizing the acid with Amberlite IRA-67 (Sigma Aldrich Amberlite IRA-67 free base, pre-washed with MeOH). The reaction mixture was filtered off and rinsed with excess methanol, concentration of the filtrate yielded the crude product as a colorless oil. Flash column chromatography (50:50  $\rightarrow$  0:100; pentane:acetone) yielded the title compound (225 mg, 0.5 mmol, *quant.*) as a colorless oil. TLC: R<sub>f</sub> 0.6 (acetone, 9:1, v:v); [ $\alpha$ ]<sub>D</sub><sup>20</sup> 31.7° (c 1.0, CHCl<sub>3</sub>); IR (neat, cm<sup>-1</sup>): 972, 1052, 1695, 2928, 3352; <sup>1</sup>H NMR (400 MHz, CD<sub>3</sub>OD, HH-COSY,

HSQC):  $\delta$  7.92 – 7.38 (m, 7H, CH<sub>arom</sub>), 4.82 (d,  $J$  = 11.5 Hz, 1H, CHH Nap), 4.69 (d,  $J$  = 11.5 Hz, 1H, CHH Nap), 4.55 (d,  $J$  = 3.6 Hz, 1H, H-1), 4.12 (q,  $J$  = 6.5 Hz, 1H, H-5), 3.99 – 3.89 (m, 2H, H-2, H-7), 3.79 – 3.67 (m, 3H, H-9, H-10, H-11), 3.38 (s, 3H, CH<sub>3</sub> OMe), 2.08 – 1.92 (m, 2H, H-3, H-8), 1.68 (dd,  $J$  = 12.5, 5.1 Hz, 1H, H-3), 1.61 (ddd,  $J$  = 14.1, 10.7, 2.7 Hz, 1H, H-8), 1.23 (d,  $J$  = 5.7 Hz, 3H, H-12), 1.11 (d,  $J$  = 6.5 Hz, 3H, H-6); <sup>13</sup>C NMR (101 MHz, MeOD, HSQC):  $\delta$  137.5, 134.8, 134.4 (C<sub>q-arom</sub>), 129.0, 128.9, 128.7, 127.7, 127.2, 127.1, 126.9 (CH<sub>arom</sub>), 100.5 (C-1), 78.7 (C-2/C-7), 77.2 (C-9), 75.7 (C-4), 72.8 (CH<sub>2</sub> Nap), 72.0 (C-11/C-10), 68.7 (C-10/C-11), 67.6 (C-5), 66.4 (C-2/C-7), 55.4 (CH<sub>3</sub> OMe), 32.8 (C-3), 31.2 (C-8), 19.8 (C-12), 13.6 (C-6); HRMS: [M+Na]<sup>+</sup> calcd for C<sub>24</sub>H<sub>34</sub>O<sub>8</sub>Na 473.2151, found 473.2148.

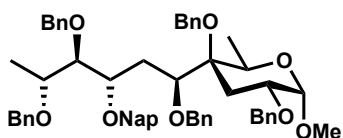

**Methyl 2,4,7,10,11-penta-O-benzyl-9-O-2-methylnaphthalene- $\alpha$ -D-caryophylloside (S32).**

Compound **S31** (225 mg, 0.5 mmol) was dissolved in DMF (5 ml, 0.1 M) and cooled on ice. NaH (1.0 g, 25.0 mmol, 50.0 eq., 60% dispersion in mineral oil) was added slowly. Consequently, BnBr (3.0 mL, 25.0 mmol, 50.0 eq.) was added and the mixture was stirred for 18 h at 40 °C. Upon full conversion, the reaction mixture was quenched with water and the suspension was diluted with water and Et<sub>2</sub>O. The aqueous layer was extracted with Et<sub>2</sub>O (3x) followed by washing the combined organic layers with H<sub>2</sub>O, sat. aq. NaHCO<sub>3</sub> and brine, respectively. Subsequently, the organic layer was dried over MgSO<sub>4</sub>, filtered, and concentrated *in vacuo* to yield the crude product as a colorless oil. Flash column chromatography (90:10 → 80:20; pentane:EtOAc) yielded the title compound (335 mg, 0.37 mmol, 74%) as a colorless oil. TLC: R<sub>f</sub> 0.2 (pentane:EtOAc, 9:1, v:v); [ $\alpha$ ]<sub>D</sub><sup>20</sup> –3.0° (c 1.0, CHCl<sub>3</sub>); IR (neat, cm<sup>-1</sup>): 1047, 1072, 1095, 1454; <sup>1</sup>H NMR (500 MHz, CDCl<sub>3</sub>, HH-COSY, HSQC):  $\delta$  7.90 – 6.78 (m, 32H, CH<sub>arom</sub>), 4.88 (d,  $J$  = 12.3 Hz, 1H, CHH Ph), 4.84 (d,  $J$  = 11.4 Hz, 1H, CHH Ph), 4.71 (s, 1H, CHH Ph), 4.68 (d,  $J$  = 3.4 Hz, 1H, H-1), 4.65 (d,  $J$  = 11.4 Hz, 1H, CHH Ph), 4.57 (d,  $J$  = 12.2 Hz, 1H, CHH Ph), 4.53 (m, 2H, CHH Ph, CHH Ph), 4.50 (m, 1H, CHH Ph), 4.46 (m, 1H, CHH Ph), 4.43 (m, 1H, CHH Ph), 4.18 (d,  $J$  = 11.5 Hz, 1H, CHH Ph), 4.07 – 3.96 (m, 3H, H-5, H-9, CHH Ph), 3.81 – 3.72 (m, 3H, H-2, H-10, CHH Ph), 3.56 (d,  $J$  = 9.5 Hz, 1H, H-7), 3.43 (dd,  $J$  = 7.6, 6.2 Hz, 1H, H-11) 3.36 (s, 3H, CH<sub>3</sub> OMe), 2.24 – 2.09 (m, 3H, H-3, H-8), 1.65 (dd,  $J$  = 13.9, 9.9 Hz, 1H, H-8), 1.29 (d,  $J$  = 6.4 Hz, 3H, H-12), 1.26 (d,  $J$  = 8.5 Hz, 3H, H-6); <sup>13</sup>C NMR (126 MHz, CDCl<sub>3</sub>, HSQC):  $\delta$  139.5, 138.9, 138.8, 138.5, 138.4, 136.2, 133.4, 133.1 (C<sub>q-arom</sub>), 128.7, 128.5, 128.4, 128.4, 128.3, 128.2, 128.2, 128.2, 128.1, 127.9, 127.9, 127.8, 127.7, 127.5, 127.3, 127.1, 127.0, 126.8, 126.6, 126.4, 126.4, 126.2 (CH<sub>arom</sub>), 97.4 (C-1), 82.0 (C-2), 80.3 (C-4), 79.1 (C-7), 76.8 (C-9), 74.9 (C-11), 74.2, 74.0 (CH<sub>2</sub> Bn), 72.0 (C-10), 71.3, 71.0, 70.7 (CH<sub>2</sub> Bn), 68.0 (C-5), 65.4 (CH<sub>2</sub> Bn), 55.1 (CH<sub>3</sub> OMe), 32.4 (C-8), 27.9 (C-3), 16.9 (C-12), 15.3 (C-6); HRMS: [M+Na]<sup>+</sup> calcd for C<sub>59</sub>H<sub>64</sub>O<sub>8</sub>Na 923.4499, found 923.4507.

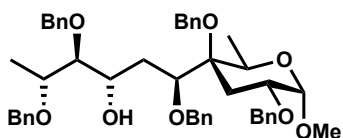

**Methyl 2,4,7,10,11-penta-O-benzyl- $\alpha$ -D-caryophylloside (S33).**

Compound **S32** (15.3 mg, 17  $\mu$ mol) was dissolved in 4:1 DCM:MeOH (340  $\mu$ L, 0.05 mL) and the solution was cooled on ice. Subsequently DDQ (7.7 mg, 34  $\mu$ mol, 2.0 eq.) was added. The mixture was stirred for 3 h at room temperature, and upon full conversion, diluted with H<sub>2</sub>O and EtOAc. The aqueous layer was extracted (3x) with EtOAc followed by washing the combined organic layer with H<sub>2</sub>O, sat. aq. NaHCO<sub>3</sub> and brine, respectively. Subsequently, the organic layer was dried over MgSO<sub>4</sub>, filtered, and concentrated *in vacuo* to yield the crude product as a colorless oil. Flash column chromatography (80:20 → 70:30; pentane:Et<sub>2</sub>O) yielded the title compound (108 mg, 102  $\mu$ mol, 85%) as a colorless oil. TLC: R<sub>f</sub> 0.5 (pentane:EtOAc, 9:1, v:v); IR (neat, cm<sup>-1</sup>): 696, 735, 1047, 1071, 1092, 1453; <sup>1</sup>H NMR (500 MHz, CDCl<sub>3</sub>, HH-COSY, HSQC):  $\delta$  7.39 – 7.15 (m, 25H, CH<sub>arom</sub>), 4.71 (d,  $J$  = 3.6 Hz, 1H, H-1), 4.68 (d,  $J$  = 11.5 Hz, 1H, CHH Ph), 4.57 (m,

7H, CHH Ph, CHH Ph, CHH Ph, CHH Ph, CHH Ph, CHH Ph, CHH Ph), 4.50 (d,  $J = 11.6$  Hz, 1H, CHH Ph), 4.37 (d,  $J = 11.6$  Hz, 1H, CHH Ph), 4.10 (q,  $J = 6.5$  Hz, 1H, H-5), 3.94 (dt,  $J = 9.3, 4.7$  Hz, 1H, H-9), 3.79 (ddd,  $J = 10.3, 7.0, 3.6$  Hz, 1H, H-2), 3.76 – 3.71 (m, 1H, H-7), 3.68 (p,  $J = 6.1$  Hz, 1H, H-11), 3.40 (s, 3H, CH<sub>3</sub> OMe), 3.34 (t,  $J = 5.6$  Hz, 1H, H-10), 2.64 (s, 1H, 9-OH), 2.21 – 2.16 (m, 2H, H-3), 1.86 (dt,  $J = 7.4, 3.6$  Hz, 2H, H-8), 1.28 (d,  $J = 6.2$  Hz, 3H, H-6/H-12), 1.26 (d,  $J = 6.0$  Hz, 3H, H-6/H-12); <sup>13</sup>C NMR (126 MHz, CDCl<sub>3</sub>, HSQC):  $\delta$  139.1, 138.9, 138.5, 138.4, 138.3 (C<sub>q-*arom*</sub>), 128.6, 128.5, 128.4, 128.4, 128.1, 128.0, 128.0, 127.9, 127.8, 127.7, 127.5, 127.4, 127.2, 126.8 (CH<sub>arom</sub>), 97.3 (C-1), 85.1 (C-10), 80.2 (C-4), 78.8 (C-7), 76.6 (C-11), 74.5, 74.3 (CH<sub>2</sub> Bn), 72.1 (C-2), 71.3, 71.0 (CH<sub>2</sub> Bn), 70.1 (C-9), 67.9 (C-5), 65.9 (CH<sub>2</sub> Bn), 55.1 (CH<sub>3</sub> OMe), 34.2 (C-8), 28.0 (C-3), 16.3 (C-12), 15.1 (C-6); HRMS: [M+Na]<sup>+</sup> calcd for C<sub>48</sub>H<sub>56</sub>O<sub>8</sub>Na 783.3873, found 783.3890.

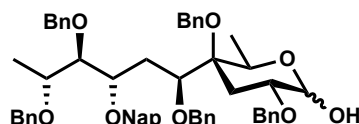

**2,4,7,10,11-Penta-O-benzyl-9-O-2-methylnaphthalene-D-caryophylloside (S34).** Compound **S32** (335 mg, 0.37 mmol) was dissolved in formic acid (6.5 mL, 0.05 M, 80% in water) and dioxane (6.5 mL, 0.05 M). SrCl<sub>2</sub>·6H<sub>2</sub>O (88 mg, 0.33 mmol, 1.0 eq) was added and the solution was stirred for 40 h at 60 °C and 250 mbar. The solution was diluted with water and EtOAc, the aqueous layer was extracted with EtOAc (3x) followed by washing the combined organic layers with H<sub>2</sub>O, sat. aq. NaHCO<sub>3</sub> and brine, respectively. Subsequently, the organic layer was dried over MgSO<sub>4</sub>, filtered, and concentrated *in vacuo* to yield the crude product as a colorless oil. Flash column chromatography (90:10 → 80:20; pentane:EtOAc) yielded the title compound (199 mg, 0.22 mmol, 68%,  $\alpha$ : $\beta$ ; 47:53) as a colorless oil. Starting material was recovered (33.3 mg, 0.037 mmol, 11%) which resulted in a 79% yield based on recovered starting material. TLC: R<sub>f</sub> 0.2 (pentane:EtOAc, 8:2, v:v); IR (neat, cm<sup>-1</sup>): 696, 734, 1028, 1072, 1093; Data of the major stereoisomer ( $\beta$ -anomer): <sup>1</sup>H NMR (400 MHz, CDCl<sub>3</sub>, HH-COSY, HSQC):  $\delta$  7.86 – 6.76 (m, 32H), 4.91 – 4.81 (m, 3H, CHH Ph, CHH Ph, CHH Ph), 4.75 – 4.57 (m, 4H, CHH Ph, CHH Ph, CHH Ph, H-1), 4.54 – 4.43 (m, 2H, CHH Ph, CHH Ph), 4.29 (q,  $J = 6.4$  Hz, 1H, H-5), 4.22 (d,  $J = 10.1$  Hz, 1H, CHH Ph), 4.19 (d,  $J = 10.2$  Hz, 1H, CHH Ph), 4.06 (dt,  $J = 11.0, 2.5$  Hz, 1H, H-9), 3.95 (d,  $J = 12.0$  Hz, 1H, CHH Ph), 3.89 – 3.71 (m, 1H, H-10), 3.65 – 3.53 (m, 2H, H-2, H-7), 3.46 (ddd,  $J = 10.3, 7.7, 6.1$  Hz, 1H, H-11), 3.17 (d,  $J = 5.1$  Hz, 1H, 1-OH), 2.35 (dd,  $J = 14.6, 5.4$  Hz, 1H, H-3), 2.29 – 2.18 (m, 2H, H-3, H-8), 1.90 (dd,  $J = 14.5, 11.7$  Hz, 1H, H-3), 1.70 – 1.58 (m, 1H, H-8), 1.34 – 1.28 (m, 6H, H-6, H-12); <sup>13</sup>C NMR (126 MHz, CDCl<sub>3</sub>, HSQC):  $\delta$  139.4, 138.7, 138.6, 138.4, 138.3, 138.0, 136.1, 133.3 (C<sub>q-*arom*</sub>), 128.6, 128.5, 128.4, 128.4, 128.4, 128.3, 128.2, 128.2, 128.2, 128.1, 128.1, 128.1, 128.1, 128.0, 128.0, 128.0, 127.8, 127.8, 127.7, 127.7, 127.7, 127.6, 127.5, 127.5, 127.2, 127.1, 127.1, 126.8, 126.8, 126.5, 126.1, 126.1 (CH<sub>arom</sub>), 99.0 (C-1), 81.9 (C-10), 79.9 (C-4), 78.3 (C-7), 76.5 (C-9), 76.1 (C-2), 74.7 (C-11), 74.2, 74.1, 72.5, 71.0, 70.8 (CH<sub>2</sub> Bn), 68.2 (C-3), 66.5 (CH<sub>2</sub> Bn), 32.6 (C-3), 31.9 (C-8), 16.7 (C-6/C-12), 15.3 (C-6/C-12); Diagnostic signals of the minor stereoisomer ( $\alpha$ -isomer): <sup>1</sup>H NMR (400 MHz, CDCl<sub>3</sub>, HH-COSY, HSQC):  $\delta$  5.27 (d,  $J = 3.0$  Hz, 1H, H-1), 2.85 (s, 1H, 1-OH), 1.90 (dd,  $J = 14.5, 11.7$  Hz, 1H, H-3); <sup>13</sup>C NMR (126 MHz, CDCl<sub>3</sub>, HSQC):  $\delta$  90.3 (C-1), 81.9 (C-10), 79.8 (C-4), 78.8 (C-7), 76.7 (C-9), 76.0 (C-5), 74.8 (C-11), 73.9, 73.6 (CH<sub>2</sub> Bn), 72.2 (C-2), 70.9, 70.7, 70.5, 65.5 (CH<sub>2</sub> Bn), 32.3 (C-8), 27.3 (C-3), 16.8 (C-12), 15.4 (C-6); HRMS: [M+Na]<sup>+</sup> calcd for C<sub>58</sub>H<sub>62</sub>O<sub>8</sub>Na 909.4342, found 909.4354.

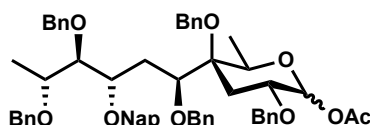

**Acetyl 2,4,7,10,11-penta-O-benzyl-9-O-2-methylnaphthalene-D-caryophylloside (S35).** Compound **S34** (44.6 mg, 50  $\mu$ mol) was dissolved in pyridine (0.5 mL, 0.1 M) and cooled on ice. Ac<sub>2</sub>O (15.3  $\mu$ L, 150  $\mu$ mol, 3.0 eq.) was added and the reaction was stirred for 18 h and subsequently quenched with water. The mixture was diluted with EtOAc, the aqueous layer was extracted with EtOAc (3x) followed by washing the combined organic layers with H<sub>2</sub>O, sat. aq. NaHCO<sub>3</sub> and brine, respectively.

Subsequently, the organic layer was dried over  $\text{MgSO}_4$ , filtered, and concentrated *in vacuo* to yield the crude product as a colorless oil. Flash column chromatography (95:5  $\rightarrow$  90:10; pentane:EtOAc) yielded the title compound (38.8 mg, 42.3  $\mu\text{mol}$ , 85%,  $\alpha$ : $\beta$ ; 20:80) as a colorless oil. TLC:  $R_f$  0.6 (pentane:EtOAc, 8:2, v:v); IR (neat,  $\text{cm}^{-1}$ ): 696, 734, 1053, 1095, 1751; Data of the major stereoisomer ( $\beta$ -anomer):  $^1\text{H}$  NMR (500 MHz,  $\text{CDCl}_3$ , HH-COSY, HSQC):  $\delta$  7.94 – 6.74 (m, 32H,  $\text{CH}_{\text{arom}}$ ), 5.55 (d,  $J = 8.1$  Hz, 1H, H-1), 4.84 (m, 2H,  $\text{CHH Ph}$ ,  $\text{CHH Ph}$ ), 4.69 – 4.43 (m, 7H,  $\text{CHH Ph}$ ,  $\text{CHH Ph}$ ), 4.22 (d,  $J = 11.6$  Hz, 1H,  $\text{CHH Ph}$ ), 4.05 (dt,  $J = 10.9$ , 1.8 Hz, 1H, H-9), 4.00 (d,  $J = 11.8$  Hz, 1H,  $\text{CHH Ph}$ ), 3.95 (q,  $J = 6.6$  Hz, 1H, H-5), 3.83 (d,  $J = 11.8$  Hz, 1H,  $\text{CHH Ph}$ ), 3.77 – 3.70 (m, 2H, H-2, H-10), 3.60 (dd,  $J = 9.7$ , 1.2 Hz, 1H, H-7), 3.47 (dd,  $J = 7.8$ , 6.0 Hz, 1H, H-11), 2.40 (dd,  $J = 14.5$ , 5.4 Hz, 1H, H-3), 2.26 – 2.19 (m, 1H, H-8), 2.11 (s, 3H,  $\text{COCH}_3$ ), 1.91 (dd,  $J = 14.5$ , 11.6 Hz, 1H, H-3), 1.62 (ddd,  $J = 14.9$ , 9.7, 1.8 Hz, 1H, H-8), 1.33 (d,  $J = 6.5$  Hz, 3H, H-6), 1.30 (d,  $J = 6.0$  Hz, 3H, H-12);  $^{13}\text{C}$  NMR (126 MHz,  $\text{CDCl}_3$ , HSQC):  $\delta$  169.7( $\text{COCH}_3$ ), 139.3, 138.7, 138.5, 138.4, 136.1, 133.4, 133.1 ( $\text{C}_{\text{q-arom}}$ ), 128.6, 128.6, 128.5, 128.4, 128.4, 128.3, 128.3, 128.3, 128.2, 128.2, 128.1, 128.0, 127.9, 127.9, 127.8, 127.8, 127.7, 127.6, 127.6, 127.5, 127.4, 127.2, 127.2, 127.1, 127.1, 126.9, 126.8, 126.7, 126.4, 126.4, 126.3, 126.2 ( $\text{CH}_{\text{arom}}$ ), 96.3 (C-1), 82.0 (C-10), 79.8 (C-4), 78.3 (C-7), 76.9 (C-5), 76.6 (C-9), 74.7 (C-11), 74.2, 73.7 ( $\text{CH}_2$  Bn), 73.6 (C-2), 72.6, 70.9, 70.6, 66.4 ( $\text{CH}_2$  Bn), 33.0 (C-3), 32.1 (C-8), 21.4 ( $\text{COCH}_3$ ), 16.8 (C-12), 15.3 (C-6); Diagnostic signals of the minor stereoisomer ( $\alpha$ -isomer):  $^1\text{H}$  NMR (500 MHz,  $\text{CDCl}_3$ , HH-COSY, HSQC):  $\delta$  6.31 (d,  $J = 3.4$  Hz, 1H, H-1), 4.12 (q,  $J = 7.1$  Hz, 1H, H-5), 2.04 (s, 3H,  $\text{COCH}_3$ );  $^{13}\text{C}$  NMR (126 MHz,  $\text{CDCl}_3$ , HSQC):  $\delta$  170.0 ( $\text{COCH}_3$ ), 89.6 (C-1), 79.8 (C-4), 32.1 (C-3), 28.3 (C-8), 21.2 ( $\text{COCH}_3$ ), 16.9 (C-12), 15.4 (C-6); HRMS:  $[\text{M}+\text{Na}]^+$  calcd for  $\text{C}_{60}\text{H}_{64}\text{O}_9\text{Na}$  951.4448, found 951.4462.

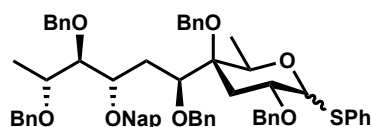

**Thiophenol 2,4,7,10,11-penta-O-benzyl-9-O-2-methylnaphthalene-D-caryophylloside (24).** Compound **S35** (38.8 mg, 42.3  $\mu\text{mol}$ ) was dissolved in DCM (0.43 mL, 0.1 M), thiophenol (4.8  $\mu\text{L}$ , 47  $\mu\text{mol}$ , 1.1 eq.) was added and subsequently cooled to  $-80$   $^{\circ}\text{C}$ .  $\text{BF}_3\cdot\text{OEt}_2$  (6.2  $\mu\text{L}$ , 50.8  $\mu\text{mol}$ , 1.2 eq.) was added and the solution was allowed to attain  $0$   $^{\circ}\text{C}$ . Upon full conversion, the solution was quenched by adding sat. aq.  $\text{NaHCO}_3$ . The solution was diluted with EtOAc, the aqueous layer was extracted with EtOAc (3x) followed by washing the combined organic layers with  $\text{H}_2\text{O}$ , sat. aq.  $\text{NaHCO}_3$  and brine, respectively. Subsequently, the organic layer was dried over  $\text{MgSO}_4$ , filtered, and concentrated *in vacuo* to yield the crude product as a colorless oil. Flash column chromatography (95:5  $\rightarrow$  80:10; pentane:EtOAc) yielded the title compound (30.1 mg, 32.0  $\mu\text{mol}$ , 61%,  $\alpha$ : $\beta$ ; 65:35) as a colorless oil. TLC:  $R_f$  0.7 (pentane:EtOAc, 8:2, v:v); IR (neat,  $\text{cm}^{-1}$ ): 696, 734, 1028, 1072, 1091; Data of the major stereoisomer ( $\alpha$ -anomer):  $^1\text{H}$  NMR (400 MHz,  $\text{CDCl}_3$ , HH-COSY, HSQC):  $\delta$  7.83 – 6.65 (m, 37H,  $\text{CH}_{\text{arom}}$ ), 5.69 (d,  $J = 5.0$  Hz, 1H, H-1), 4.84 – 4.74 (m, 3H,  $\text{CHH Ph}$ ,  $\text{CHH Ph}$ ,  $\text{CHH Ph}$ ), 4.63 – 4.35 (m, 5H,  $\text{CHH Ph}$ ,  $\text{CHH Ph}$ ,  $\text{CHH Ph}$ ,  $\text{CHH Ph}$ ,  $\text{CHH Ph}$ ), 4.16 – 4.10 (m, 1H, H-2), 4.05 (m, 1H,  $\text{CHH Ph}$ ), 4.00 – 3.94 (m, 2H, H-9,  $\text{CHH Ph}$ ), 3.77 – 3.65 (m, 3H, H-10,  $\text{CHH Ph}$ ,  $\text{CHH Ph}$ ), 3.54 (d,  $J = 9.1$  Hz, 1H, H-7), 3.43 – 3.33 (m, 1H, H-11), 2.24 – 2.11 (m, 2H, H-3, H-8), 1.99 (dd,  $J = 14.2$ , 12.2 Hz, 1H, H-3), 1.60 (dd,  $J = 13.7$ , 9.5 Hz, 1H, H-8), 1.24 (d,  $J = 4.5$  Hz, 3H, H-6/H-12), 1.21 (d,  $J = 6.0$  Hz, 3H, H-6/H-12);  $^{13}\text{C}$  NMR (101 MHz,  $\text{CDCl}_3$ , HSQC):  $\delta$  139.3, 138.8, 138.7, 138.4, 138.0, 136.1, 135.3, 133.3, 133.1 ( $\text{C}_{\text{q-arom}}$ ), 132.1, 131.3, 128.9, 128.8, 128.6, 128.5, 128.4, 128.3, 128.3, 128.3, 128.2, 128.1, 128.1, 128.0, 127.8, 127.8, 127.7, 127.6, 127.5, 127.4, 127.2, 127.1, 127.1, 126.9, 126.8, 126.7, 126.6, 126.4, 126.4, 126.2 ( $\text{CH}_{\text{arom}}$ ), 87.6 (C-1), 82.0 (C-10), 80.0 (C-4), 78.7 (C-7), 76.8 (C-9), 74.9 (C-11), 74.2, 73.9 ( $\text{CH}_2$  Bn), 71.9 (C-2), 71.0, 70.9, 70.7 ( $\text{CH}_2$  Bn), 69.4 (C-5), 65.4 ( $\text{CH}_2$  Bn), 32.4 (C-8), 30.4 (C-3), 16.9 (C-6/C-12), 15.3 (C-6/C-12); Diagnostic signals of the minor stereoisomer ( $\beta$ -isomer):  $^1\text{H}$  NMR (400 MHz,  $\text{CDCl}_3$ , HH-COSY, HSQC):  $\delta$  3.86 (d,  $J = 11.9$  Hz, 1H,  $\text{CHH Ph}$ ), 3.61 (td,  $J = 10.9$ , 5.3 Hz, 1H, H-2), 3.50 (d,  $J = 9.2$  Hz, 1H, H-7), 2.32 (dd,  $J = 14.4$ , 5.4 Hz, 1H, H-3), 1.84 (dd,  $J = 14.4$ , 11.1 Hz, 1H, H-3), 1.52 (dd,  $J = 13.2$ , 9.7 Hz, 1H, H-8), 1.28 (d,  $J = 6.5$  Hz, 3H, H-6/H-12), 1.24 (d,  $J = 6.1$  Hz, 3H, H-6/H-12);  $^{13}\text{C}$  NMR (101 MHz,  $\text{CDCl}_3$ , HSQC):  $\delta$  88.4 (C-1), 82.0 (C-10), 79.7 (C-4), 79.1 (C-7), 78.5 (C-9), 76.5 (C-11), 74.6 (C-2), 74.2, 73.7, 73.0, 72.3 ( $\text{CH}_2$  Bn), 70.7 (C-5), 66.4 ( $\text{CH}_2$  Bn), 34.3 (C-8),

31.8 (C-3), 16.8 (C-12), 15.7 (C-6); HRMS:  $[M+Na]^+$  calcd for  $C_{64}H_{66}O_7SNa$  1001.4427, found 1001.4418.

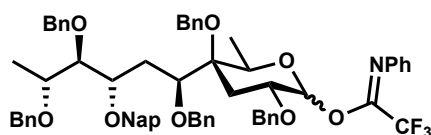

**2,2,2-Trifluoro-*N*-phenylacetimido-yl 2,4,7,10,11-penta-*O*-benzyl-9-*O*-2-methylnaphthalene-*D*-caryophylloside (S36).** Compound **S34** (105 mg, 0.12 mmol) was dissolved in acetone (1.2 mL, 0.1 M) and cooled on ice. Subsequently,  $CsCO_3$  (40.1 mg, 0.12 mmol, 1.1 eq.) and 2,2,2-trifluoro-*N*-phenylacetimido-yl chloride (37.7  $\mu$ L, 0.24 mmol, 2.0 eq.) were added and the solution was allowed to attain room temperature. After stirring for 18 h, the solution was diluted with  $H_2O$  and EtOAc. The aqueous layer was extracted (3x) with EtOAc followed by washing the combined organic layer with  $H_2O$ , sat. aq.  $NaHCO_3$  and brine, respectively. Subsequently, the organic layer was dried over  $MgSO_4$ , filtered, and concentrated *in vacuo* to yield the crude product as a colorless oil. Flash column chromatography (95:5  $\rightarrow$  80:20; pentane:Et $_2$ O) yielded the title compound (10.3 mg, 13.5  $\mu$ mol, 80%,  $\alpha$ : $\beta$ ; 28:72) as a colorless oil. TLC:  $R_f$  0.2 (pentane:EtOAc, 8:2, v:v); IR (neat,  $cm^{-1}$ ): 695, 734, 1027, 1093, 1207, 1453, 1717; Data of the major stereoisomer ( $\beta$ -anomer):  $^1H$  NMR (400 MHz, toluene- $d_8$ , HH-COSY, HSQC,  $T = 333$  K):  $\delta$  7.94 – 6.64 (m, 37H,  $CH_{arom}$ ), 4.89 – 4.74 (m, 4H,  $CHH$  Ph,  $CHH$  Ph,  $CHH$  Ph,  $CHH$  Ph), 5.64 (d,  $J = 7.5$  Hz, 1H), 4.59 (s, 6H,  $CHH$  Ph,  $CHH$  Ph,  $CHH$  Ph,  $CHH$  Ph,  $CHH$  Ph,  $CHH$  Ph), 4.26 (m, 2H,  $CHH$  Ph,  $CHH$  Ph), 4.12 – 3.92 (m, 2H, H-5, H-9), 3.78 (dt,  $J = 12.1, 6.6$  Hz, 1H, H-2), 3.71 (dd,  $J = 6.9, 2.0$  Hz, 1H, H-10), 3.58 (d,  $J = 9.2$  Hz, 1H, H-7), 3.55 – 3.48 (m, 1H, H-11), 2.32 (dd,  $J = 14.6, 5.5$  Hz, 1H, H-3), 2.18 (dd,  $J = 10.2, 5.0$  Hz, 1H, H-8), 1.86 (dd,  $J = 14.7, 11.4$  Hz, 1H, H-3), 1.62 (dd,  $J = 14.9, 9.4$  Hz, 1H, H-8), 1.37 – 1.20 (m, 6H, H-6, H-12);  $^{13}C$  NMR (101 MHz, toluene- $d_8$ ,  $T = 333$  K):  $\delta$  137.8 (C=N), 129.0 (t,  $J = 23.7$  Hz,  $CF_3$ ), 128.8, 128.7, 128.6, 128.5, 128.0, 127.8, 127.6, 126.9, 126.7, 126.5, 126.4, 126.3, 125.9, 125.7, 124.6, 124.4, 120.3 ( $CH_{arom}$ ), 101.1 (C-1), 84.0 (C-10), 80.0 (C-4), 78.4 (C-7), 77.6 (C-11), 76.0, 74.8 ( $CH_2$  Bn), 74.6 (C-2), 74.5, 73.1 ( $CH_2$  Bn), 72.6 C-9), 71.8 (C-5), 71.4, 67.4 ( $CH_2$  Bn), 33.6 (C-3/C-8), 33.5 (C-3/C-8), 16.8 (C-12), 15.7 (C-6); Diagnostic signals of the minor stereoisomer ( $\alpha$ -isomer):  $^1H$  NMR (400 MHz, toluene- $d_8$ , HH-COSY, HSQC,  $T = 333$  K):  $\delta$  6.53 (d,  $J = 3.4$  Hz, 1H, H-1), 1.94 (dd,  $J = 14.9, 9.2$  Hz, 1H, H-8);  $^{13}C$  NMR (101 MHz, toluene- $d_8$ ,  $T = 333$  K):  $\delta$  125.43 (t,  $J = 24.2$  Hz,  $CF_3$ ), 94.9 (C-1).

## Synthesis of compound 25

**Scheme S5.** Synthesis of compound 25.

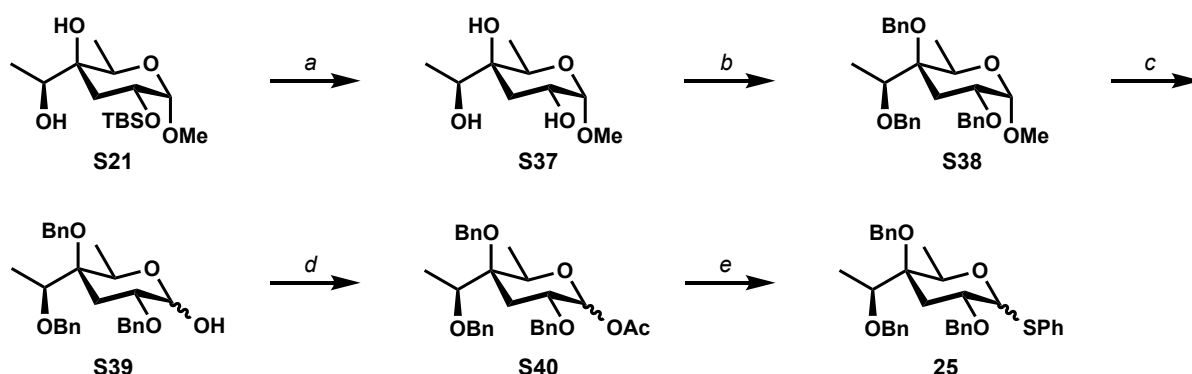

**Reagents and conditions:** a)  $HCl$ , MeOH (*quant.*); b)  $BnBr$ ,  $NaH$ , DMF (53%); c)  $Ac_2O$ ,  $H_2SO_4$  (88%); d)  $PhSH$ ,  $BF_3 \cdot OEt_2$ , DCM (77%).

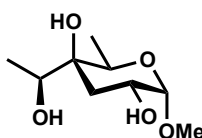

**Methyl  $\alpha$ -D-yersinioside (S37).** Compound **S21** (1.0 g, 3.1 mmol) was dissolved in MeOH (62 mL, 0.05 M). 6 M aq. HCl was added (5.2 mL, 31 mmol, 10 eq.) and the mixture was stirred at room temperature for 3 h. Upon full conversion, the reaction was quenched with basic Amberlite IRA-67 resin (Sigma Aldrich Amberlite IRA-67 free base, pre-washed with MeOH). After filtration, the mixture was concentrated *in vacuo*. Purification by flash column chromatography (80:20  $\rightarrow$  60:40; pentane:EtOAc) afforded the title compound (639 mg, 3.1 mmol, *quant.*) as a colorless oil. TLC:  $R_f$  0.7 (acetone);  $[\alpha]_D^{20}$  74.9° (c 1.0, MeOH); IR (neat,  $\text{cm}^{-1}$ ): 1035, 2939, 3383;  $^1\text{H}$  NMR (400 MHz,  $\text{CDCl}_3$ , HH-COSY, HSQC):  $\delta$  4.67 (d,  $J = 3.9$  Hz, 1H, H-1), 4.05 (q,  $J = 6.6$  Hz, 1H, H-5), 3.92 (dddd,  $J = 10.9, 9.5, 6.7, 4.7$  Hz, 1H, H-2), 3.69 (qd,  $J = 6.6, 3.6$  Hz, 1H, H-7), 3.45 (s, 3H,  $\text{CH}_3$  OMe), 2.24 (s, 1H, OH), 1.95 (d,  $J = 3.7$  Hz, 1H, OH), 1.90 (d,  $J = 10.8$  Hz, 1H, OH), 1.83 (ddd,  $J = 12.5, 5.6, 0.8$  Hz, 1H, H-3), 1.71 (dd,  $J = 12.6, 11.7$  Hz, 1H, H-3), 1.21 (m, 6H, H-6, H-8);  $^{13}\text{C}$  NMR (101 MHz,  $\text{CDCl}_3$ , HSQC):  $\delta$  98.6 (C-1), 74.5 (C-7), 71.5 (C-3), 66.1 (C-5), 65.7 (C-2), 55.4 ( $\text{CH}_3$  OMe), 34.7 (C-3), 17.1 (C-8), 14.0 (C-6); HRMS:  $[\text{M}+\text{Na}]^+$  calcd for  $\text{C}_9\text{H}_{18}\text{O}_5\text{Na}$  229.1046, found 229.1049.

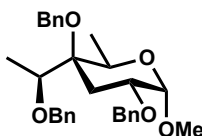

**Methyl 2,4,7-tri-O-benzyl- $\alpha$ -D-yersinioside (S38).** Glycoside **S37** (190 mg, 920  $\mu\text{mol}$ ) was dissolved in DMF (9.2 mL, 0.1 M) and BnBr (4.4 mL, 36.8 mmol, 40 eq.) and NaH (1.5 g, 36.8 mmol, 40 eq., 60% dispersion in mineral oil) were added at 0 °C. The mixture was stirred for 96 h at 40 °C and the reaction was quenched with  $\text{H}_2\text{O}$  at 0 °C. The organic phase was washed with sat. aq.  $\text{NaHCO}_3$  and brine respectively, dried over  $\text{MgSO}_4$ , filtered, and concentrated *in vacuo*. Flash column chromatography (95:5  $\rightarrow$  80:20; pentane:EtOAc) yielded the title compound (233 mg, 920  $\mu\text{mol}$ , 53%) as a colorless oil. TLC:  $R_f$  0.7 (pentane:EtOAc, 9:1, v:v);  $[\alpha]_D^{20}$  47.8° (c 1.0,  $\text{CHCl}_3$ ); IR (neat,  $\text{cm}^{-1}$ ): 734, 1046, 1454, 2936;  $^1\text{H}$  NMR (400 MHz,  $\text{CDCl}_3$ , HH-COSY, HSQC):  $\delta$  7.38 – 7.22 (m, 15H,  $\text{CH}_{\text{arom}}$ ), 4.72 – 4.53 (m, 5H,  $\text{CH}_2$  Bn,  $\text{CH}_2$  Bn, H-1), 4.36 (dd,  $J = 23.6, 11.6$  Hz, 2H,  $\text{CH}_2$  Bn), 4.14 (q,  $J = 6.5$  Hz, 1H, H-7), 3.79 (ddd,  $J = 12.0, 5.0, 3.6$  Hz, 1H, H-2), 3.53 (q,  $J = 6.3$  Hz, 1H, H-5), 3.42 (s, 3H,  $\text{CH}_3$  OMe), 2.22 – 2.14 (m, 1H, H-3), 2.07 (dd,  $J = 13.9, 12.0$  Hz, 1H, H-3), 1.25 (d,  $J = 6.4$  Hz, 3H, H-8), 1.21 (d,  $J = 6.6$  Hz, 3H, H-6);  $^{13}\text{C}$  NMR (101 MHz,  $\text{CDCl}_3$ , HSQC):  $\delta$  139.3, 138.6, 138.3 ( $\text{C}_{\text{q-arom}}$ ), 128.6, 128.4, 128.3, 128.2, 128.1, 127.8, 127.7, 127.4, 127.3, 127.0, 127.0, 126.9 ( $\text{CH}_{\text{arom}}$ ), 97.2 (C-1), 79.2 (C-4), 76.8 (C-7), 72.0 (C-2), 71.2, 71.0 ( $\text{CH}_2$  Bn), 67.4 (C-5), 65.0 ( $\text{CH}_2$  Bn), 55.0 ( $\text{CH}_3$  OMe), 27.5 (C-3), 14.7 (C-8), 14.3 (C-6); HRMS:  $[\text{M}+\text{Na}]^+$  calcd for  $\text{C}_{30}\text{H}_{36}\text{O}_5\text{Na}$  499.2460, found 499.2459.

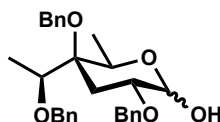

**2,4,7-Tri-O-benzyl-D-yersinioside (S39).** Compound **S38** (100 mg, 210  $\mu\text{mol}$ ) was dissolved in 80% aq.  $\text{HCOOH}$  (2.1 mL, 0.1 M) and  $\text{SrCl}_2 \cdot 6\text{H}_2\text{O}$  (6.7 mg, 42  $\mu\text{mol}$ , 0.2 eq.) was added. The mixture was stirred for 24 h at 40 °C, and the reaction was quenched with  $\text{H}_2\text{O}$  at 0 °C. The organic phase was washed with sat. aq.  $\text{NaHCO}_3$  and brine respectively, dried over  $\text{MgSO}_4$ , filtered, and concentrated *in vacuo*. Flash column chromatography (90:10  $\rightarrow$  70:30; pentane:EtOAc) yielded the title compound (43 mg, 94  $\mu\text{mol}$ , 47%,  $\alpha$ : $\beta$ ; 34:66) as a colorless oil. TLC:  $R_f$  0.2 (pentane:EtOAc, 8:2, v:v); IR (neat,  $\text{cm}^{-1}$ ): 696, 734, 1027, 1074, 1453, 3399; Data of the major stereoisomer ( $\beta$ -anomer):  $^1\text{H}$  NMR (400 MHz,  $\text{CDCl}_3$ , HH-COSY, HSQC):  $\delta$  7.42 – 7.18 (m, 15H,  $\text{CH}_{\text{arom}}$ ), 4.79 (d,  $J = 11.7$  Hz, 2H,  $\text{CH}_2$  Bn), 4.75 – 4.53 (m, 5H,  $\text{CH}_2$  Bn,  $\text{CH}_2$  Bn, H-1), 4.11 (q,  $J = 6.5$  Hz, 1H, H-7), 3.68 – 3.60 (m, 1H, H-2), 3.48 (q,  $J = 6.1$  Hz, 1H, H-5), 2.95 (d,  $J = 5.1$  Hz, 1H, 1-OH), 2.35 (dd,  $J = 14.7, 5.7$  Hz, 1H, H-3), 1.96 (dd,  $J = 14.6, 11.6$  Hz, 1H, H-3), 1.24 (d,  $J = 6.2$  Hz, 3H, H-8), 1.18 (d,  $J = 6.4$  Hz, 3H, H-6);  $^{13}\text{C}$  NMR (101 MHz,

CDCl<sub>3</sub>, HSQC):  $\delta$  139.3, 138.6, 138.3 (C<sub>q-*arom*</sub>), 128.5, 128.4, 128.3, 128.2, 128.1, 127.8, 127.7, 127.4, 127.3, 127.0, 127.0, 126.9 (CH<sub>*arom*</sub>), 98.9 (C-1), 79.1 (C-4), 76.3 (C-2), 76.1 (C-7), 75.7 (C-5), 72.4, 72.2, 71.0 (CH<sub>2</sub> Bn), 31.9 (C-3), 14.6 (C-6), 14.3 (C-8); Diagnostic signals of the minor stereoisomer ( $\alpha$ -anomer): <sup>1</sup>H NMR (400 MHz, CDCl<sub>3</sub>, HH-COSY, HSQC):  $\delta$  5.29 (d,  $J$  = 3.6 Hz, 1H, H-1), 4.49 (d,  $J$  = 11.4 Hz, 1H, *CHH* Bn), 4.43 (q,  $J$  = 6.5 Hz, 1H, H-5), 4.33 (t,  $J$  = 12.2 Hz, 2H, CH<sub>2</sub> Bn), 3.84 (ddd,  $J$  = 11.4, 5.3, 3.6 Hz, 1H, H-2), 2.89 (s, 1H, 1-OH), 2.21 (dd,  $J$  = 13.9, 5.1 Hz, 1H, H-3), 2.16 – 2.02 (m, 1H, H-3), 1.27 (d,  $J$  = 6.3 Hz, 3H, H-6), 1.21 (d,  $J$  = 6.6 Hz, 3H, H-8); <sup>13</sup>C NMR (101 MHz, CDCl<sub>3</sub>, HSQC):  $\delta$  128.5, 127.6, 127.4, 127.2, 126.9 (CH<sub>*arom*</sub>), 90.1 (C-1), 70.7, 67.0, 65.6 (CH<sub>2</sub> Bn), 26.8 (C-3), 13.9 (C-8), 13.4 (C-6); HRMS: [M+Na]<sup>+</sup> calcd for C<sub>29</sub>H<sub>34</sub>O<sub>5</sub>Na 485.2298, found 485.2299.

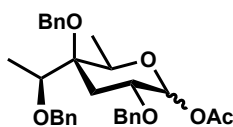

**Acetyl 2,4,7-tri-O-benzyl-D-yersinioside (S40).** Compound **S39** (69 mg, 150  $\mu$ mol) was dissolved in pyridine (0.4 mL, 0.4 M) and Ac<sub>2</sub>O (45  $\mu$ L, 450  $\mu$ mol, 3.0 eq.) was added at 0 °C. The reaction mixture was stirred for 24 h and quenched with sat. aq. NaHCO<sub>3</sub> upon full conversion. The organic phase was washed with sat. aq. NaHCO<sub>3</sub> and brine, respectively. The organic layer was dried over MgSO<sub>4</sub>, filtered, and concentrated *in vacuo*. Flash column chromatography (90:10; pentane:EtOAc) yielded the title compound **74** (66 mg, 130  $\mu$ mol, 87%,  $\alpha$ : $\beta$ ; 24:76) as a colorless oil. TLC: R<sub>f</sub> 0.5 (pentane:EtOAc, 9:1, v:v); IR (neat, cm<sup>-1</sup>): 696, 734, 1053, 1088, 1228, 1453, 1748; Data of the major stereoisomer ( $\beta$ -anomer): <sup>1</sup>H NMR (500 MHz, CDCl<sub>3</sub>, HH-COSY, HSQC):  $\delta$  7.42 – 7.16 (m, 15H, CH<sub>*arom*</sub>), 5.61 (d,  $J$  = 8.1 Hz, 1H, H-1), 4.67 – 4.56 (m, 3H, *CHH* Bn, *CHH* Bn, *CHH* Bn), 4.46 (m, 1H, *CHH* Bn), 4.36 – 4.30 (m, 2H, *CHH* Bn, *CHH* Bn), 4.18 (q,  $J$  = 6.4 Hz, 1H, H-7), 3.79 (ddd,  $J$  = 11.5, 8.1, 5.7 Hz, 1H, H-2), 3.48 (q,  $J$  = 6.2 Hz, 1H, H-5), 2.39 (dd,  $J$  = 14.6, 5.7 Hz, 1H, H-3), 2.12 (s, 3H, COCH<sub>3</sub>), 2.00 (dd,  $J$  = 14.7, 11.5 Hz, 1H, H-3), 1.23 (d,  $J$  = 6.2 Hz, 3H, H-6), 1.18 (d,  $J$  = 6.4 Hz, 3H, H-8); <sup>13</sup>C NMR (126 MHz, CDCl<sub>3</sub>, HSQC):  $\delta$  169.7 (COCH<sub>3</sub>), 139.3, 138.4, 138.2 (C<sub>q-*arom*</sub>), 128.6, 128.6, 128.5, 128.4, 128.4, 128.0, 127.9, 127.9, 127.9, 127.8, 127.6, 127.4, 127.3, 127.3, 127.1 (CH<sub>*arom*</sub>), 96.3 (C-1), 79.0 (C-4), 76.7 (C-7), 76.0 (C-5), 73.9 (C-2), 72.6, 70.9, 66.9 (CH<sub>2</sub> Bn), 32.2 (C-3), 21.4 (COCH<sub>3</sub>), 14.4 (C-8), 13.6 (C-6); Diagnostic signals of the minor stereoisomer ( $\alpha$ -anomer): <sup>1</sup>H NMR (500 MHz, CDCl<sub>3</sub>, HH-COSY, HSQC):  $\delta$  6.33 (d,  $J$  = 3.6 Hz, 1H, H-1), 3.89 (ddd,  $J$  = 12.1, 5.2, 3.5 Hz, 1H, H-2), 3.56 (q,  $J$  = 6.3 Hz, 1H, H-5), 2.23 (ddd,  $J$  = 13.9, 4.6, 0.8 Hz, 1H, H-3), 2.12 (s, 3H, COCH<sub>3</sub>), 1.28 (d,  $J$  = 6.3 Hz, 3H, H-6), 1.21 (d,  $J$  = 6.6 Hz, 3H, H-8); <sup>13</sup>C NMR (126 MHz, CDCl<sub>3</sub>, HSQC):  $\delta$  170.1 (COCH<sub>3</sub>), 139.2, 138.6, 138.0 (C<sub>q-*arom*</sub>), 89.6 (C-1), 79.0 (C-4), 76.8 (C-7), 71.5, 71.1 (CH<sub>2</sub> Bn), 71.0 (C-2), 70.3 (C-5), 65.7 (CH<sub>2</sub> Bn), 27.8 (C-3), 21.3 (COCH<sub>3</sub>), 14.7 (C-8), 14.1 (C-6); HRMS: [M+Na]<sup>+</sup> calcd for C<sub>31</sub>H<sub>36</sub>O<sub>6</sub>Na 527.2404, found 527.2410.

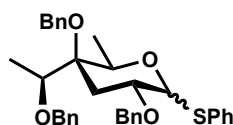

**Phenyl 2,4,7-tri-O-benzyl-1-thio-D-yersinioside (25).** Compound **S40** (66 mg, 130  $\mu$ mol) was dissolved in DCM (1.3 mL, 0.1 M) and cooled to –80 °C upon which thiophenol (14.6  $\mu$ L, 143  $\mu$ mol, 1.1 eq.) and BF<sub>3</sub>·OEt<sub>2</sub> (19.3  $\mu$ L, 156  $\mu$ mol, 1.2 eq.) were added. The reaction mixture was stirred for 2 h and was allowed to warm to room temperature. The reaction was quenched with sat. aq. NaHCO<sub>3</sub> and the organic phase was washed with sat. aq. NaHCO<sub>3</sub> and brine, respectively. The organic layer was dried over MgSO<sub>4</sub>, filtered, and concentrated *in vacuo*. Flash column chromatography (99:1 → 95:5; pentane:EtOAc) yielded the title compound (55 mg, 100  $\mu$ mol, 77%,  $\alpha$ : $\beta$ ; 65:35) as a colorless oil. TLC: R<sub>f</sub> 0.7 (pentane:EtOAc, 9.5:0.5, v:v); IR (neat, cm<sup>-1</sup>): 694, 733, 1026, 1073, 1453; Data of the major stereoisomer ( $\alpha$ -anomer): <sup>1</sup>H NMR (400 MHz, CDCl<sub>3</sub>, HH-COSY, HSQC):  $\delta$  7.70 – 7.12 (m, 15H), 5.78 (d,  $J$  = 5.1 Hz, 1H, H-1), 4.75 – 4.61 (m, 3H, *CHH* Ph, *CHH* Ph, H-7), 4.57 (d,  $J$  = 10.0 Hz, 1H, *CHH* Ph), 4.50 (d,  $J$  = 10.0 Hz, 1H, *CHH* Ph), 4.47 – 4.40 (m, 1H, *CHH* Ph), 4.36 (d,  $J$  = 11.9 Hz, 1H, *CHH* Ph), 4.15 (dt,  $J$  = 11.9, 4.9 Hz, 1H, H-2), 3.60 (q,  $J$  = 6.2 Hz, 1H, H-5), 2.29 (dd,  $J$  = 14.3, 4.6 Hz, 1H, H-3),



2.07 (dd,  $J = 14.4, 11.9$  Hz, 1H, H-3), 1.29 (d,  $J = 6.2$  Hz, 3H, H-8), 1.23 – 1.17 (m, 3H, H-6);  $^{13}\text{C}$  NMR (101 MHz,  $\text{CDCl}_3$ , HSQC):  $\delta$  139.2, 138.5, 137.8, 135.2 ( $\text{C}_{\text{q- arom}}$ ), 132.1, 131.3, 128.8, 128.7, 128.5, 128.4, 128.4, 128.3, 128.2, 128.0, 127.9, 127.8, 127.7, 127.6, 127.4, 127.4, 127.2, 127.1, 127.1, 126.9 ( $\text{CH}_{\text{arom}}$ ), 87.3 (C-1), 79.0 (C-4), 78.9 (C-7), 72.3 ( $\text{CH}_2$  Bn), 72.0 (C-2), 70.9, 70.8 ( $\text{CH}_2$  Bn), 69.1 (C-5), 29.7 (C-3), 14.6 (C-8), 14.1 (C-6); Diagnostic signals of the minor stereoisomer ( $\beta$ -anomer):  $^1\text{H}$  NMR (400 MHz,  $\text{CDCl}_3$ , HH-COSY, HSQC):  $\delta$  4.65 (d,  $J = 8.3$  Hz, 1H, H-1), 4.05 (q,  $J = 6.4$  Hz, 1H, H-7), 3.72 (td,  $J = 10.3, 5.5$  Hz, 1H, H-2), 3.45 (q,  $J = 6.2$  Hz, 1H, H-5), 2.37 (dd,  $J = 14.5, 5.6$  Hz, 1H, H-3), 1.97 (dd,  $J = 14.5, 11.0$  Hz, 1H, H-3);  $^{13}\text{C}$  NMR (101 MHz,  $\text{CDCl}_3$ , HSQC):  $\delta$  88.3 (C-1), 78.9 (C-4), 78.8 (C-7), 76.1 (C-5), 73.2 (C-2), 72.1, 70.7, 66.9 ( $\text{CH}_2$  Bn), 33.4 (C-3), 14.7 (C-8), 13.3 (C-6); HRMS:  $[\text{M}+\text{Na}]^+$  calcd for  $\text{C}_{35}\text{H}_{38}\text{O}_4\text{SNa}$  577.2383, found 577.2389.

## Preparation of the target compounds

### Synthesis of compound 1

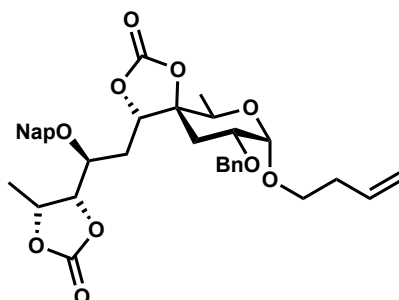

**3-Butene 2-O-benzyl-4,7,10,11-di-O-carbonate-9-O-(2-methylnaphthalene)- $\alpha$ -D-caryophylloside (30).** Compound 4 (1.68 g, 2.5 mmol) was dissolved in DCM (50 mL, 0.05 M) in a flame dried flask containing activated 3 Å molecular sieves (rods, size 1/16 in., Sigma Aldrich).  $\text{Ph}_2\text{SO}$  (650 mg, 3.25 mmol, 1.3 eq.), ethyl maleimide (625 mg 5.0 mmol, 2 eq) and TTBP (1.55 g, 6.25 mmol, 2.5 eq.) were added. The solution was stirred at room temperature for 30 min. The solution was cooled to  $-80$  °C upon which  $\text{Tf}_2\text{O}$  (550  $\mu\text{L}$ , 3.25 mmol, 1.3 eq.) was added slowly. Subsequently, the solution was allowed to attain to  $-65$  °C to secure full activation of the donor followed by cooling back to  $-80$  °C after which TBAI (7.4 g, 20 mmol, 8 eq.) was added. The solution was stirred for 5 min at  $-80$  °C followed by the addition of the acceptor (5.4 mL, 62.5 mmol, 25 eq.) and triphenylphosphine oxide (4.17 g, 15 mmol, 6.0 eq.). The reaction was refluxed for 40 h upon which the reaction was quenched with sat. aq.  $\text{NaHCO}_3$  followed by the dilution with EtOAc and sat. aq.  $\text{Na}_2\text{S}_2\text{O}_3$ . The aqueous layer was extracted three times with EtOAc. The organic layer was washed with  $\text{H}_2\text{O}$  and brine, dried over  $\text{MgSO}_4$ , filtered off and concentrated under reduced pressure. Flash column chromatography (80:20  $\rightarrow$  60:40; pentane:EtOAc) yielded the title compound (943 mg, 1.49 mmol, 60%,  $\alpha$ : $\beta$ ; >98:2) as a white foam. TLC:  $R_f$  0.6 (pentane:EtOAc, 6:4, v:v);  $[\alpha]_D^{20}$  66.1° (c 0.5,  $\text{CHCl}_3$ ); IR (neat,  $\text{cm}^{-1}$ ): 1055, 1202, 1797;  $^1\text{H}$  NMR (500 MHz,  $\text{CDCl}_3$ , HH-COSY, HSQC, HMBC):  $\delta$  7.89 – 7.27 (m, 12H,  $\text{CH}_{\text{arom}}$ ), 5.83 (ddt,  $J = 17.1, 10.3, 6.8$  Hz, 1H, H-15), 5.14 (dq,  $J = 17.2, 1.6$  Hz, 1H, H-16), 5.09 (ddt,  $J = 10.2, 2.1, 1.2$  Hz, 1H, H-16), 4.95 – 4.88 (m, 1H, H-11), 4.78 (d,  $J = 2.0$  Hz, 2H,  $\text{CH}_2$  Bn/Nap), 4.77 (d,  $J = 3.3$  Hz, 1H, H-1), 4.63 (dd,  $J = 7.4, 6.4$  Hz, 1H, H-10), 4.55 (d,  $J = 12.1$  Hz, 1H,  $\text{CHH}$  Bn/Nap), 4.50 (d,  $J = 12.0$  Hz, 1H,  $\text{CHH}$  Bn/Nap), 4.33 (dd,  $J = 11.4, 1.9$  Hz, 1H, H-7), 4.02 (ddd,  $J = 8.5, 6.4, 3.1$  Hz, 1H, H-9), 3.92 (q,  $J = 6.3$  Hz, 1H, H-5), 3.75 (ddd,  $J = 11.7, 4.8, 3.3$  Hz, 1H, H-2), 3.69 (dt,  $J = 9.8, 6.9$  Hz, 1H, H-13), 3.55 (dt,  $J = 9.9, 6.4$  Hz, 1H, H-13), 2.40 (ttt,  $J = 8.0, 6.7, 1.4$  Hz, 2H, H-14), 2.13 – 2.03 (m, 2H, H-3, H-8), 1.92 (ddd,  $J = 14.9, 8.6, 2.0$  Hz, 1H, H-8), 1.83 (dd,  $J = 13.5, 4.8$  Hz, 1H, H-3), 1.46 (d,  $J = 6.7$  Hz, 3H, H-12), 1.22 (d,  $J = 6.3$  Hz, 3H, H-6);  $^{13}\text{C}$  NMR (126 MHz,  $\text{CDCl}_3$ , HSQC, HMBC):  $\delta$  153.6, 153.5 ( $\text{O}(\text{C}=\text{O})\text{O}$ ), 137.9 ( $\text{C}_{\text{q- arom}}$ ), 135.2 (C-15), 134.1, 133.3, 133.3 ( $\text{C}_{\text{q- arom}}$ ), 128.9, 128.6, 128.1, 128.0, 127.9, 126.8, 126.8, 126.7, 125.4 ( $\text{CH}_{\text{arom}}$ ), 117.1 (C-16), 95.5 (C-1), 84.9 (C-4), 81.0 (C-7), 78.9 (C-10), 75.8 (C-11), 73.8 (C-9), 73.7, 71.5 ( $\text{CH}_2$  Bn/Nap), 71.5 (C-2), 67.7 (C-13), 64.8 (C-5), 34.0 (C-14), 33.7 (C-3), 29.7 (C-8), 15.3 (C-12), 14.9 (C-6); HRMS:  $[\text{M}+\text{Na}]^+$  calcd for  $\text{C}_{36}\text{H}_{40}\text{O}_{10}\text{Na}$  655.2519, found 655.2514.

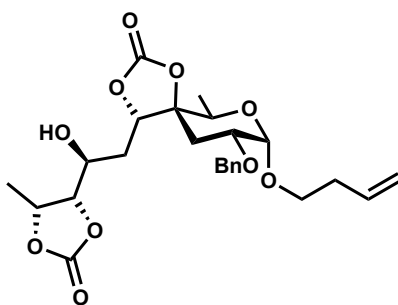

**3-Butene 2-O-benzyl-4,7,10,11-di-O-carbonate- $\alpha$ -D-caryophylloside (31).** Compound **30** (943 mg, 1.49 mmol) was divided into 15 equal portions of 0.1 mmol. Compound **30** (0.1 mmol, 63.3 mg, 1.0 eq.) was dissolved in 1:1 (v:v) DCM:HFIP (2.0 mL, 0.05 M) and TES (50  $\mu$ L, 0.3 mmol, 3.0 eq.) was added. Then 0.5 M solution of HCl in HFIP (3.0 mL, 1.5 mmol, 15 eq.) was added and the reaction mixture was stirred for 2 h. Upon completion, the reaction was quenched with sat. aq. NaHCO<sub>3</sub>. The aqueous layer was extracted twice with EtOAc followed by washing the combined organic layers with H<sub>2</sub>O, sat. aq. NaHCO<sub>3</sub> and brine, respectively. Subsequently, the organic layer was dried over MgSO<sub>4</sub>, filtered, and concentrated *in vacuo* to yield the crude product. Flash column chromatography (70:30  $\rightarrow$  40:60; pentane:EtOAc) yielded the title compound (454 mg, 0.92 mmol, 61%) as a white foam. TLC: R<sub>f</sub> 0.7 (pentane:EtOAc, 1:1, v:v);  $[\alpha]_D^{20}$  32.1° (c 1.0, CHCl<sub>3</sub>); IR (neat, cm<sup>-1</sup>): 1058, 1205, 1357, 1800, 2918, 3477; <sup>1</sup>H NMR (500 MHz, CDCl<sub>3</sub>, HH-COSY, HSQC, HMBC):  $\delta$  7.38 – 7.28 (m, 5H, CH<sub>arom</sub>), 5.83 (ddt, *J* = 17.1, 10.2, 6.8 Hz, 1H, H-15), 5.18 – 5.05 (m, 2H, H-16, H-16), 4.97 (p, *J* = 6.7 Hz, 1H, H-11), 4.80 (d, *J* = 3.3 Hz, 1H, H-1), 4.59 (d, *J* = 1.5 Hz, 2H, CH<sub>2</sub> Bn), 4.53 (dd, *J* = 11.9, 2.1 Hz, 1H, H-7), 4.40 (dd, *J* = 9.0, 7.3 Hz, 1H, H-10), 4.08 (q, *J* = 8.5 Hz, 1H, H-9), 3.93 (q, *J* = 6.3 Hz, 1H, H-5), 3.81 (ddd, *J* = 11.4, 5.0, 3.3 Hz, 1H, H-2), 3.71 (dt, *J* = 9.8, 6.9 Hz, 1H, H-13), 3.55 (dt, *J* = 9.8, 6.4 Hz, 1H, H-13), 2.99 (d, *J* = 7.0 Hz, 1H, 9-OH), 2.40 (tdt, *J* = 8.7, 7.9, 4.4, 1.3 Hz, 2H, H-14), 2.18 – 1.99 (m, 3H, H-3, H-3, H-8), 1.70 (ddd, *J* = 14.8, 10.5, 2.1 Hz, 1H, H-8), 1.49 (d, *J* = 6.7 Hz, 3H, H-12), 1.24 (d, *J* = 6.3 Hz, 3H, H-6); <sup>13</sup>C NMR (126 MHz, CDCl<sub>3</sub>, HSQC, HMBC):  $\delta$  154.0, 153.9 (O(C=O)O), 137.9 (C<sub>q-arom</sub>), 135.1 (C-15), 128.7, 128.2, 128.0 (CH<sub>arom</sub>), 117.1 (C-16), 95.5 (C-1), 85.2 (C-4), 80.9 (C-7), 80.0 (C-10), 76.2 (C-11), 71.7 (CH<sub>2</sub> Bn), 71.7 (C-2), 67.7 (C-13), 65.1 (C-5), 64.8 (C-9), 34.1 (C-14), 33.7 (C-3), 32.1 (C-8), 15.0 (C-12), 14.8 (C-6); HRMS: [M+Na]<sup>+</sup> calcd for C<sub>25</sub>H<sub>32</sub>O<sub>10</sub>Na 515.1893, found 515.1888.

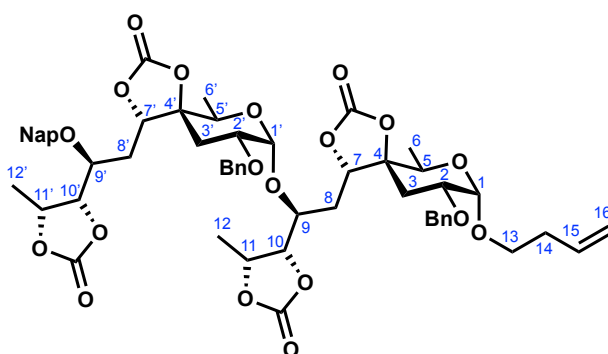

**3-Butene 2-O-benzyl-4,7,10,11-di-O-carbonate-9-O-[2-O-benzyl-4,7,10,11-di-O-carbonate-9-O-(2-methylnaphthalene)- $\alpha$ -D-caryophyllosyl]- $\alpha$ -D-caryophylloside (32).** Compound **4** (335 mg, 0.5 mmol, 1 eq.) was dissolved in DCM (10 mL, 0.05 M) in a flame dried flask containing activated 3 Å molecular sieves (rods, size 1/16 in., Sigma Aldrich). Ph<sub>2</sub>SO (110 mg, 0.55 mmol, 1.1 eq.) and TTBP (310 mg, 1.25 mmol, 2.5 eq.) were added. The solution was stirred at room temperature for 30 min. The solution was cooled to –80 °C upon which Tf<sub>2</sub>O (93.5  $\mu$ L, 0.55 mmol, 1.1 eq.) was added slowly. Subsequently, the solution was allowed to attain to –65 °C to secure full activation of the donor followed by cooling back to –80 °C after which acceptor **31** (2.0 mL of a 0.5 M solution, 2.0 eq.) was added. The reaction was stirred for 20 h at –65 °C upon which the reaction was quenched with sat. aq. NaHCO<sub>3</sub> followed by the dilution with DCM. The aqueous layer was extracted three times with EtOAc. The organic layer was washed with H<sub>2</sub>O and brine, dried over MgSO<sub>4</sub>, filtered off and concentrated under reduced pressure. Size exclusion chromatography by isocratic elution with DCM:MeOH (1:1, v:v) followed by

flash column chromatography (80:20 → 70:30; pentane:acetone) yielded the title compound (262 mg, 249  $\mu\text{mol}$ , 50%,  $\alpha$ : $\beta$ ; >98:2) as a white foam. TLC:  $R_f$  0.4 (pentane:acetone, 7:3, v:v);  $[\alpha]_D^{20}$  42.6° (c 0.5,  $\text{CHCl}_3$ ); IR (neat,  $\text{cm}^{-1}$ ): 754, 1062, 1201, 1802;  $^1\text{H}$  NMR (400 MHz,  $\text{CDCl}_3$ , HH-COSY, HSQC, HMBC):  $\delta$  7.90 – 7.28 (m, 17H,  $\text{CH}_{\text{arom}}$ ), 5.79 (ddt,  $J = 17.1, 10.2, 6.7$  Hz, 1H, H-15), 5.14 – 5.04 (m, 2H, H-16, H-16), 4.99 – 4.87 (m, 3H, H-1, H-11, H-11'), 4.85 – 4.75 (m, 3H,  $\text{CHH}$  Bn/Nap,  $\text{CHH}$  Bn/Nap, H-10), 4.71 (d,  $J = 3.3$  Hz, 1H, H-1'), 4.70 – 4.58 (m, 2H, H-7, H-10'), 4.53 – 4.32 (m, 5H,  $\text{CHH}$  Bn/Nap,  $\text{CHH}$  Bn/Nap,  $\text{CHH}$  Bn/Nap,  $\text{CHH}$  Bn/Nap, H-7'), 4.10 (td,  $J = 8.8, 3.0$  Hz, 1H, H-9'), 4.04 – 3.93 (m, 2H, H-5', H-9), 3.83 – 3.75 (m, 2H, H-2', H-5), 3.65 (dt,  $J = 9.9, 6.9$  Hz, 1H, H-13), 3.55 (dt,  $J = 11.8, 4.4$  Hz, 1H, H-2), 3.48 (dt,  $J = 9.9, 6.4$  Hz, 1H, H-13), 2.35 (q,  $J = 7.7$  Hz, 2H, H-14), 2.19 – 1.96 (m, 3H, H-8, H-8', H-8'), 1.95 – 1.78 (m, 5H, H-3, H-3', H-3, H-3', H-8), 1.54 – 1.48 (m, 6H, H-12, H-12'), 1.25 (d,  $J = 6.3$  Hz, 3H, H-6'), 1.16 (d,  $J = 6.3$  Hz, 3H, H-6);  $^{13}\text{C}$  NMR (101 MHz,  $\text{CDCl}_3$ , HSQC, HMBC):  $\delta$  153.7, 153.6, 153.4, 153.1 (O(C=O)O), 137.9, 137.1 ( $\text{C}_{\text{q-arom}}$ ), 135.0 (C-15), 134.3, 133.2 ( $\text{C}_{\text{q-arom}}$ ), 129.0, 128.7, 128.6, 128.4, 128.1, 128.0, 127.9, 127.8, 126.8, 126.7, 126.6, 125.5 ( $\text{CH}_{\text{arom}}$ ), 117.0 (C-16), 98.3 (C-1'), 95.3 (C-1), 84.5 (C-4'), 84.0 (C-4), 80.9 (C-7'), 80.2 (C-7), 79.9 (C-10), 79.0 (C-10'), 76.3 (C-9), 75.9 (C-11/C-11'), 75.6 (C11'/C-11), 73.8 (C-9'), 73.8 ( $\text{CH}_2$  Bn/Nap), 72.0 (C-2'), 71.9 ( $\text{CH}_2$  Bn/Nap), 71.5 (C-2), 71.5 ( $\text{CH}_2$  Bn/Nap), 67.7 (C-13), 66.3 (C-5'), 64.7 (C-5), 33.9 (C-14), 32.9 (C-3'/C-3), 32.8 (C-3/C-3'), 29.6 (C-8'), 29.3 (C-8), 15.3 (C-12'/C-12), 15.1 (C-12/C-12'), 14.9 (C-6, C-6'); HRMS:  $[\text{M}+\text{Na}]^+$  calcd for  $\text{C}_{57}\text{H}_{54}\text{O}_{19}\text{Na}$  1075.3939, found 1075.3934.

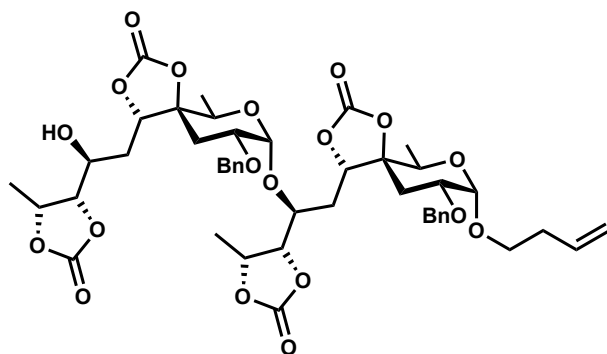

**3-Butene 2-O-benzyl-4,7,10,11-di-O-carbonate-9-O-[2-O-benzyl-4,7,10,11-di-O-carbonate- $\alpha$ -D-caryophyllosyl]- $\alpha$ -D-caryophylloside (33).** Compound **32** (84 mg, 80  $\mu\text{mol}$ ) was dissolved in 1:1 DCM:HFIP (1.6 mL, 0.05 M) and TES (40  $\mu\text{L}$ , 240  $\mu\text{mol}$ , 3.0 eq.) was added. Then 1.0 M solution of HCl in HFIP (2.4 mL, 2.4 mmol, 30 eq.) was added and the reaction mixture was stirred for 1.5 h. Upon completion the reaction was quenched with sat. aq.  $\text{NaHCO}_3$ . The aqueous layer was extracted twice with EtOAc followed by washing the combined organic layers with  $\text{H}_2\text{O}$ , sat. aq.  $\text{NaHCO}_3$  and brine, respectively. Subsequently, the organic layer was dried over  $\text{MgSO}_4$ , filtered, and concentrated *in vacuo* to yield the crude product. Flash column chromatography (70:30 → 40:60; pentane:EtOAc) yielded the title compound (44 mg, 48  $\mu\text{mol}$ , 60%) as a white foam. TLC:  $R_f$  0.3 (toluene:EtOAc, 1:1, v:v);  $[\alpha]_D^{20}$  – 102.8° (c 0.25,  $\text{CHCl}_3$ ); IR (neat,  $\text{cm}^{-1}$ ): 753, 1052, 1201, 1368, 1804, 2923;  $^1\text{H}$  NMR (500 MHz,  $\text{CDCl}_3$ , HH-COSY, HSQC):  $\delta$  7.40 – 7.27 (m, 10H,  $\text{CH}_{\text{arom}}$ ), 5.80 (ddt,  $J = 17.1, 10.3, 6.7$  Hz, 1H, H-15), 5.14 – 5.04 (m, 2H, H-16, H-16), 5.02 – 4.95 (m, 2H, H-11, H-11'), 4.92 (d,  $J = 3.4$  Hz, 1H, H-1'), 4.86 (dd,  $J = 7.5, 3.8$  Hz, 1H, H-10), 4.72 (d,  $J = 3.3$  Hz, 1H, H-1), 4.63 – 4.55 (m, 3H, H-7, H-7', H-10'), 4.55 – 4.43 (m, 4H,  $\text{CHH}$  Bn,  $\text{CHH}$  Bn,  $\text{CHH}$  Bn,  $\text{CHH}$  Bn), 4.06 – 3.98 (m, 3H, H-5, H-5', H-9), 3.87 (ddd,  $J = 11.8, 4.9, 3.3$  Hz, 1H, H-2'), 3.79 (q,  $J = 6.2$  Hz, 1H, H-5), 3.66 (dt,  $J = 10.0, 6.9$  Hz, 1H, H-13), 3.59 (ddd,  $J = 11.8, 4.8, 3.3$  Hz, 1H, H-2), 3.50 (dt,  $J = 10.0, 6.4$  Hz, 1H, H-13), 3.08 (d,  $J = 8.4$  Hz, 1H, 9'-OH), 2.36 (dddd,  $J = 9.5, 7.8, 5.4, 1.3$  Hz, 2H, H-14), 2.22 – 1.82 (m, 8H, H-3, H-3', H-3, H-3', H-8, H-8', H-8, H-8'), 1.56 – 1.48 (m, 6H, H-12, H-12'), 1.27 (d,  $J = 6.3$  Hz, 3H, H-6'), 1.15 (d,  $J = 6.3$  Hz, 3H, H-6);  $^{13}\text{C}$  NMR (126 MHz,  $\text{CDCl}_3$ , HSQC):  $\delta$  154.2, 154.1, 153.6, 153.6 (O(C=O)O), 137.9, 137.3 ( $\text{C}_{\text{q-arom}}$ ), 135.1 (C-15), 129.1, 129.0, 129.0, 128.7, 128.6, 128.4, 128.2, 128.1, 128.1, 128.0, 127.9, 127.9, 127.9 ( $\text{CH}_{\text{arom}}$ ), 117.1 (C-16), 97.4 (C-1'), 95.5 (C-1), 84.8 (C-4'), 84.4 (C-4), 81.2 (C-7'), 80.7 (C-7), 80.0 (C-10), 79.9 (C-10'), 76.4 (C-11, C-11'), 75.9 (C-9), 72.2 (C-2'), 72.1, 71.6 ( $\text{CH}_2$  Bn), 71.6 (C-2), 67.8 (C-13), 66.5 (C-9'), 65.2 (C-5'), 64.7 (C-5), 34.0 (C-14), 33.1 (C-3), 33.1, (C-3'), 32.5 (C-8'), 28.8 (C-8), 15.1

(C-12'/C-12), 15.0 (C-12/C-12'), 15.0 (C-6/C-6'), 14.9 (C-6'/C-6); HRMS:  $[M+Na]^+$  calcd for  $C_{46}H_{56}O_{19}Na$  935.3313, found 935.3308.

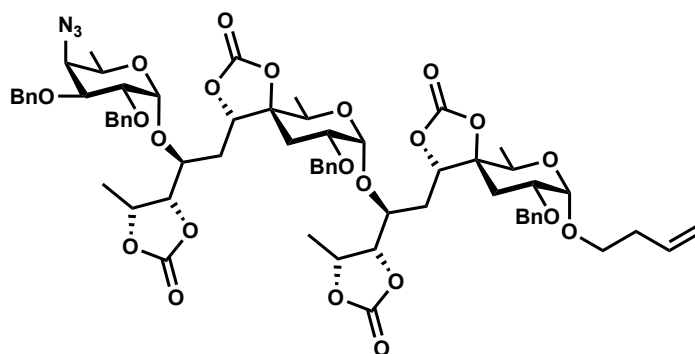

**3-Butene 2-O-benzyl-4,7,10,11-di-O-carbonate-9-O-[2-O-benzyl-4,7,10,11-di-O-carbonate-9-O-[4-azido-2,3-di-O-benzyl-4,6-dideoxy- $\alpha$ -D-galactopyranosyl]- $\alpha$ -D-caryophyllosyl]- $\alpha$ -D-caryophylloside (34).** Compound **3** (150  $\mu$ mol, 69.2 mg, 3 eq.) was dissolved in DCM (1.0 mL, 0.05 M) in a flame dried flask containing activated 3 Å molecular sieves (rods, size 1/16 in., Sigma Aldrich).  $Ph_2SO$  (29 mg, 145  $\mu$ mol, 2.9 eq.) and TTBP (31 mg, 125  $\mu$ mol, 2.5 eq.) were added. The solution was stirred at room temperature for 30 min. The solution was cooled to  $-80$  °C upon which  $Tf_2O$  (24.5  $\mu$ L, 145  $\mu$ mol, 2.9 eq.) was added slowly. Subsequently, the solution was allowed to attain to  $-65$  °C to secure full activation of the donor followed by cooling back to  $-80$  °C after which acceptor **33** (0.1 mL of a 0.5 M solution, 1.0 eq.) was added. The reaction was stirred for 20 h at  $-65$  °C upon which the reaction was quenched with sat. aq.  $NaHCO_3$  followed by the dilution with DCM. The aqueous layer was extracted three times with EtOAc. The organic layer was washed with  $H_2O$  and brine, dried over  $MgSO_4$ , filtered off and concentrated under reduced pressure. Size exclusion chromatography by isocratic elution with DCM:MeOH (1:1, v:v) followed by flash column chromatography (70:30  $\rightarrow$  50:50; pentane:acetone) yielded the title compound (27.1 mg, 21.4  $\mu$ mol, 43%,  $\alpha$ : $\beta$ ; >98:2) as a white foam. TLC:  $R_f$  0.6 (EtOAc:toluene, 1:1, v:v);  $^1H$  NMR (500 MHz,  $CDCl_3$ , HH-COSY, HSQC, HMBC):  $\delta$  7.44 – 7.27 (m, 20H,  $CH_{arom}$ ), 5.79 (ddt,  $J$  = 17.0, 10.3, 6.7 Hz, 1H, H-15), 5.13 – 5.04 (m, 2H, H-16, H-16), 4.97 (d,  $J$  = 3.9 Hz, 1H, H-1''), 4.94 – 4.82 (m, 5H, H-1', H-7', H-11, H-11',  $CHH$  Bn), 4.79 (s, 2H,  $CH_2$  Bn), 4.72 – 4.68 (m, 3H, H-1, H-10, H-10'), 4.61 – 4.53 (m, 2H, H-7,  $CHH$  Bn), 4.48 (d,  $J$  = 11.8 Hz, 1H,  $CHH$  Bn), 4.42 (d,  $J$  = 11.9 Hz, 1H,  $CHH$  Bn), 4.38 (d,  $J$  = 10.7 Hz, 1H,  $CHH$  Bn), 4.32 (d,  $J$  = 10.8 Hz, 1H,  $CHH$  Bn), 4.09 – 4.03 (m, 2H, H-3'', H-5''), 3.99 – 3.91 (m, 3H, H-2'', H-9, H-9'), 3.82 – 3.73 (m, 3H, H-4'', H-5, H-5'), 3.65 (dt,  $J$  = 9.9, 6.8 Hz, 1H, H-2'), 3.57 (ddd,  $J$  = 12.0, 4.7, 3.5 Hz, 1H, H-13), 3.54 – 3.50 (m, 1H, H-2), 3.47 (dt,  $J$  = 10.0, 6.5 Hz, 1H, H-13), 2.35 (qd,  $J$  = 6.7, 6.2, 2.9 Hz, 2H, H-14), 1.94 – 1.89 (m, 2H, H-8', H-8'), 1.83 (ddd,  $J$  = 9.1, 6.1, 3.2 Hz, 2H, H-8, H-8), 1.76 (dd,  $J$  = 13.6, 11.9 Hz, 1H, H-3), 1.68 (dd,  $J$  = 13.5, 11.9 Hz, 1H, H-3'), 1.48 (d,  $J$  = 6.7 Hz, 6H, H-12, H-12'), 1.27 (d,  $J$  = 6.4 Hz, 3H, H-6''), 1.21 (d,  $J$  = 6.2 Hz, 3H, H-6'), 1.15 (d,  $J$  = 6.3 Hz, 3H, H-6);  $^{13}C$  NMR (126 MHz,  $CDCl_3$ , HSQC):  $\delta$  153.7, 153.7, 153.4, 153.3 (O(C=O)O), 138.0, 138.0, 137.7, 137.3 ( $C_{q-arom}$ ), 135.0 (C-15), 129.1, 129.1, 129.1, 128.8, 128.6, 128.6, 128.5, 128.5, 128.4, 128.3, 128.2, 128.1, 127.9, 127.9, 127.8, 127.8, 127.7 ( $CH_{arom}$ ), 117.1 (C-16), 100.9 (C-1''), 98.3 (C-1'), 95.4 (C-1), 84.5 (C-4'), 83.8 (C-4), 80.4 (C-10, C-10'), 80.1 (C-7'), 80.0 (C-7), 78.3 (C-3''), 76.3 (C-9'/C-9), 76.0 (C-9/C-9'), 75.9 (C-2''), 75.9 (C-11'/C-11), 75.6 (C-11/C-11'), 75.3, 72.6 ( $CH_2$  Bn), 72.2 (C-2'), 72.1 ( $CH_2$  Bn), 71.6 (C-2), 71.5 ( $CH_2$  Bn), 67.8 (C-13), 66.4 (C-5'), 66.0 (C-5''), 64.8 (C-4''), 64.1 (C-5), 33.9 (C-14), 32.9 (C-3), 32.0 (C-3'), 29.8 (C-8'), 29.3 (C-8), 17.6 (C-6''), 15.2 (C-12'/C-12), 15.1 (C-12/C-12'), 15.0 (C-6, C-6'); HRMS:  $[M+Na]^+$  calcd for  $C_{66}H_{77}O_{22}N_3Na$  1286.4896, found 1286.4890.

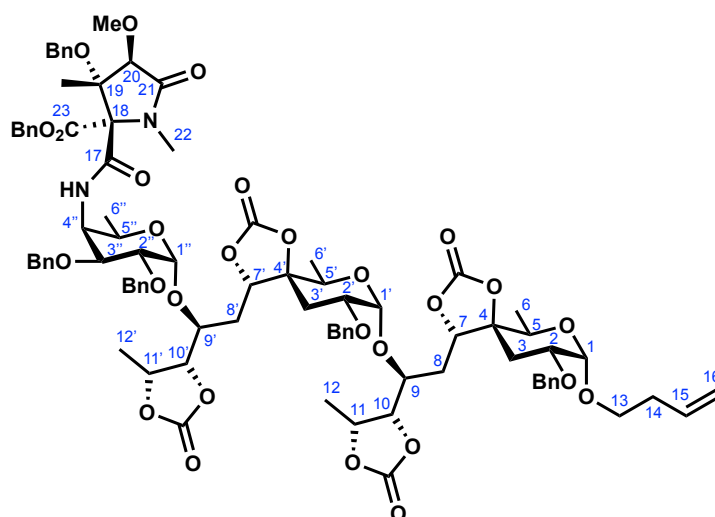

**3-Butene 2-O-benzyl-4,7,10,11-di-O-carbonate-9-O-[2-O-benzyl-4,7,10,11-di-O-carbonate-9-O-[4-[(2'S,3'S,4'R)-3'-O-Benzyl-2''-(benzyloxycarbonyl)-4'-methoxy-1',3'-dimethyl-5'-oxopyrrolidine-2'-carboxamido]-2,3-di-O-benzyl-4,6-dideoxy- $\alpha$ -D-galactopyranosyl]- $\alpha$ -D-caryophyllosyl]- $\alpha$ -D-caryophylloside (35).** Compound **34** (26.5 mg, 21  $\mu$ mol, 1.0 eq.) was dissolved in THF (200  $\mu$ L, 0.1 M) followed by the addition of trimethylphosphine (23.1  $\mu$ L, 23.1  $\mu$ mol, 1.1 eq. [1.0 M solution in THF, Sigma-Aldrich]). The mixture was stirred for 3 h at room temperature upon which H<sub>2</sub>O (4.7  $\mu$ L, 262  $\mu$ mol, 12.5 eq.) was added and the reaction was stirred for another 18 h. Upon completion, the reaction was concentrated *in vacuo* to yield the crude galactosamine. To a stirred solution of pyrrolidone **2** (10.9 mg, 26.3  $\mu$ mol, 1.25 eq.) and triethylamine (7.3  $\mu$ L, 53  $\mu$ mol, 2.5 eq.) in CH<sub>3</sub>CN (0.2 mL, 0.1 M) was added HATU (10.5 mg, 27.7  $\mu$ mol, 1.3 eq.). The solution was stirred for 30 min at room temperature followed by the addition of the galactosamine in 0.2 mL CH<sub>3</sub>CN. The reaction was stirred for 3 h at room temperature upon which 1M HCl and EtOAc were added. The aqueous layer was extracted with EtOAc (3x) followed by washing the combined organic layers with H<sub>2</sub>O, sat. aq. NaHCO<sub>3</sub> and brine, respectively. Subsequently, the organic layer was dried over MgSO<sub>4</sub>, filtered, and concentrated *in vacuo* to yield the crude product as a colorless oil. Size exclusion chromatography by isocratic elution with DCM:MeOH (1:1, v:v) yielded the title compound (5 mg, 3  $\mu$ mol, 15%, over 2 steps) as a colorless oil. TLC: R<sub>f</sub> 0.5 (toluene:acetone, 7:3, v:v); <sup>1</sup>H NMR (600 MHz, CDCl<sub>3</sub>, HH-COSY, HSQC):  $\delta$  8.08 (d, *J* = 10.1 Hz, 1H, NH), 7.39 – 7.13 (m, 30H, CH<sub>arom</sub>), 5.78 (ddt, *J* = 17.1, 10.3, 6.7 Hz, 1H, H-15), 5.21 (d, *J* = 12.0 Hz, 1H, CHH Bn), 5.15 – 5.05 (m, 3H, CHH Bn, H-16, H-16), 4.96 (d, *J* = 4.1 Hz, 1H, H-1''), 4.93 – 4.82 (m, 5H, H-1', H-7', H-11', H-11, CHH Bn), 4.72 – 4.67 (m, 3H, H-1, H-10', H-10), 4.65 – 4.60 (m, 2H, H-4'', CHH Bn), 4.59 – 4.53 (m, 2H, H-7, CHH Bn), 4.51 – 4.46 (m, 2H, CHH Bn, CHH Bn), 4.41 (d, *J* = 11.8 Hz, 1H, CHH Bn), 4.37 (d, *J* = 11.6 Hz, 1H, CHH Bn), 4.34 (d, *J* = 10.6 Hz, 1H, CHH Bn), 4.29 (d, *J* = 10.5 Hz, 1H, CHH Bn), 4.23 (q, *J* = 6.6, 3.7 Hz, 1H, H-5''), 4.03 (dd, *J* = 10.2, 3.9 Hz, 1H, H-3''), 3.99 (q, *J* = 5.9 Hz, 1H, H-9'), 3.94 (dt, *J* = 10.0, 3.6 Hz, 1H, H-9), 3.91 (s, 1H, H-20), 3.79 (q, *J* = 6.2 Hz, 1H, H-5'), 3.73 (q, *J* = 6.2 Hz, 1H, H-5), 3.67 – 3.55 (m, 5H, H-2'', H-13, OCH<sub>3</sub>), 3.55 – 3.42 (m, 3H, H-2, H-2', H-13), 2.58 (s, 3H, NCH<sub>3</sub>), 2.34 (ddt, *J* = 6.4, 3.0, 1.4 Hz, 2H, H-14), 1.93 – 1.61 (m, 8H, H-3, H-3', H-3, H-3', H-8, H-8', H-8, H-8'), 1.52 (d, *J* = 6.6 Hz, 3H, H-12''), 1.47 (d, *J* = 6.6 Hz, 3H, H-12), 1.44 (s, 3H, 19-CH<sub>3</sub>), 1.22 (d, *J* = 6.2 Hz, 3H, H-6'), 1.19 (d, *J* = 6.4 Hz, 3H, H-6''), 1.13 (d, *J* = 6.3 Hz, 3H, H-6); <sup>13</sup>C NMR (151 MHz, CDCl<sub>3</sub>, HSQC):  $\delta$  172.7 (C=O ester), 169.1, 164.5 (C=O amide), 153.6, 153.4 (O(C=O)O), 138.3, 138.2, 137.9, 137.8, 137.2 (C<sub>q-arom</sub>), 135.0 (C-15), 134.4 (C<sub>q-arom</sub>), 129.2, 129.1, 129.0, 128.8, 128.7, 128.7, 128.6, 128.6, 128.6, 128.5, 128.4, 128.2, 128.2, 127.9, 127.8, 127.8, 127.7, 127.1 (CH<sub>arom</sub>), 117.1 (C-16), 101.4 (C-1''), 97.8 (C-1'), 95.3 (C-1), 84.4 (C-4'), 84.0 (C-19), 83.8 (C-4), 82.5 (C-20), 80.5 (C-10'), 80.1 (C-10), 80.0 (C-7'), 79.8 (C-7), 78.9 (C-18), 77.6 (C-3''), 76.5 (C-9'/C-9), 76.3 (C-2''), 76.0 (C-9/C-9'), 75.9 (C-11'/C-11), 75.6 (CH<sub>2</sub> Bn), 75.6 (C-11/C-11'), 72.2 (C-2'), 72.1, 71.6 (CH<sub>2</sub> Bn), 71.5 (C-2), 71.4, 68.7, 67.8, 66.5 (CH<sub>2</sub> Bn), 66.5 (C-5'), 65.7 (C-5''), 64.7 (C-5), 59.5 (CH<sub>3</sub> OMe), 51.4 (C-4''), 33.9 (C-14), 32.8 (C-3'), 31.8 (C-3), 30.0 (C-8'), 29.8 (C-8), 29.2 (CH<sub>3</sub> NMe), 17.6 (C-6''), 15.3 (C-12'/C-12), 15.2 (C-12/C-12'), 15.0 (C-6'/C-6), 15.0 (C-6/C-6'), 14.9 (CH<sub>3</sub>); HRMS: [M+Na]<sup>+</sup> calcd for C<sub>89</sub>H<sub>102</sub>O<sub>28</sub>N<sub>2</sub>Na 1669.6517, found 1669.6511.

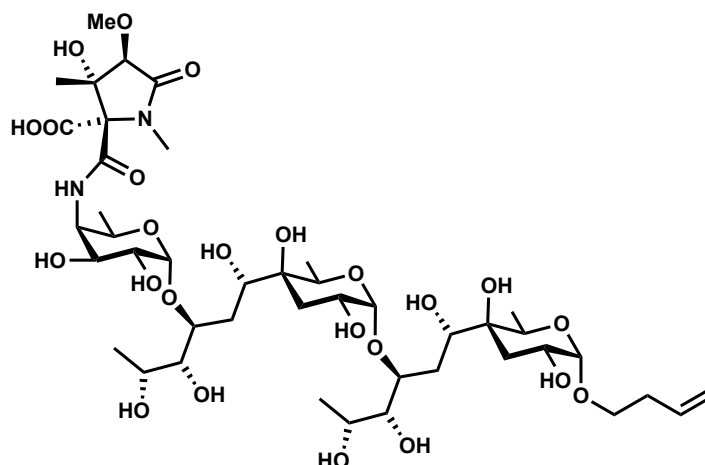

**3-Butene**      **9-O-[9-O-[4-[(2'S,3'S,4'R)-2'-carboxyl-3'-hydroxy-4'-methoxy-1',3'-dimethyl-5'-oxopyrrolidine-2'-carboxamido]-4,6-dideoxy- $\alpha$ -D-galactopyranosyl]- $\alpha$ -D-caryophyllosyl]- $\alpha$ -D-caryophylloside (1).** The protected target structure **35** (4.9 mg, 3  $\mu$ mol) was dissolved in 0.6 mL 1:1 v:v THF:H<sub>2</sub>O (0.005 M). LiOH·H<sub>2</sub>O (12.6 mg, 300  $\mu$ mol, 100 eq.) was added and the resulting mixture was stirred at room temperature for 20 h. Upon completion, 80% of the LiOH was quenched with 0.1 M HCl (2.4 mL) and the mixture was concentrated under reduced pressure to yield the crude product. The crude product was then co-evaporated twice with dry toluene. 3 mL ammonia was condensed at  $-70$  °C, sodium (3.45 mg, 150  $\mu$ mol, 50 eq.) was added and the resulting suspension was stirred for 30 min. The crude product was dissolved in 0.5 mL THF, hexene (50  $\mu$ L, used for scales from 1-25  $\mu$ mol) and *t*-BuOH (2.85  $\mu$ L, 30  $\mu$ mol, 10 eq.) and the solution was added to the suspension of sodium in ammonia. The reaction mixture was stirred at  $-70$  °C for 15 min, upon which the reaction was quenched with water. The reaction mixture was then stirred at room temperature until all ammonia had evaporated. The mixture was concentrated *in vacuo* to yield the crude product as a colorless oil. Flash column chromatography (30:70  $\rightarrow$  50:50; MeOH:DCM) followed by size exclusion over a 250x10 mm column filled with Biogel P2 media (Bio-Rad) yielded the title compound **1** (1.2 mg, 1.2  $\mu$ mol, 40% over two steps) as a colorless oil. The NMR data showed the presence of four atropisomers in D<sub>2</sub>O. Data for atropisomeric mixture: <sup>1</sup>H NMR (850 MHz, D<sub>2</sub>O, HH-COSY, HSQC):  $\delta$  6.10 (td, *J* = 10.4, 6.7 Hz, 1H, H-15), 5.35 (d, *J* = 17.5, 1.7 Hz, 1H, H-16), 5.30 – 5.26 (m, 2H, H-1'', H-16), 5.13 – 5.09 (m, 1H, H-1'), 4.98 (d, *J* = 3.7 Hz, 1H, H-1), 4.59 – 4.39 (m, 4H, H-4'', H-5'', H-5', H-5), 4.34 – 4.22 (m, 3H, H-3'', H-9', H-9), 4.19 – 4.05 (m, 5H, H-2', H-2, H-7', H-7, H-20), 3.98 – 3.71 (m, 10H, H-2'', H-10', H-10, H-11', H-11, H-13, H-13, CH<sub>3</sub> OMe), 3.01 – 2.93 (m, 3H, CH<sub>3</sub> NMe), 2.58 (p, *J* = 7.0 Hz, 2H, H-14), 2.19 – 2.05 (m, 4H, H-8', H-8, H-3', H-3), 2.00 – 1.91 (m, 2H, H-8', H-8), 1.84 – 1.74 (m, 2H, H-3', H-3), 1.51 – 1.36 (m, 9H, H-12', H-12, 19-CH<sub>3</sub>), 1.35 – 1.23 (m, 9H, H-6'', H-6', H-6); <sup>13</sup>C NMR (214 MHz, D<sub>2</sub>O, HSQC):  $\delta$  172.2, 172.1, 170.0, 169.9 (C=O amide), 136.9 (C-15), 117.4 (C-16), 102.2 (C-1''), 101.0 (C-1'), 98.1 (C-1), 85.6, 85.1, 83.7 (C-20), 80.2, 80.2 (C-19), 78.9 (C-9', C-9), 78.9 (C-9, C-9'), 78.7 (C-10', C-10), 78.3 (C-10, C-10'), 75.9 (C-4', C-4), 75.8 (C-4, C-4'), 70.8, 70.5 (C-2''), 70.1, 70.0 (C-3''), 69.9 (C-7', C-7), 69.8 (C-7, C-7'), 68.5 (C-18), 68.2 (C-5', C-5), 68.2 (C-11', C-11), 68.1 (C-11, C-11'), 68.0 (C-13), 67.7 (C-5, C-5'), 66.8, 66.3 (C-5''), 65.9 (C-2', C-2), 65.5 (C-2, C-2'), 60.9, 60.8 (CH<sub>3</sub> OMe), 56.0, 55.5 (C-4''), 34.1 (C-14), 31.1 (C-8', C-8), 31.0 (C-8, C-8'), 30.7, 30.6, 30.5 (CH<sub>3</sub> NMe), 29.3 (C-3', C-3), 29.2 (C-3, C-3'), 20.1 (C-12', C-12), 19.9 (C-12, C-12'), 19.0, 17.2 (CH<sub>3</sub>), 16.6 (C-6''), 13.0 (C-6', C-6), 12.9 (C-6, C-6'); HRMS: [M+Na]<sup>+</sup> calcd for C<sub>43</sub>H<sub>74</sub>O<sub>24</sub>N<sub>2</sub>Na 1025.4529, found 1025.4524.

## Synthesis of compound 36 and S44

**Scheme S6.** Synthesis of compound **36** and **S44**.

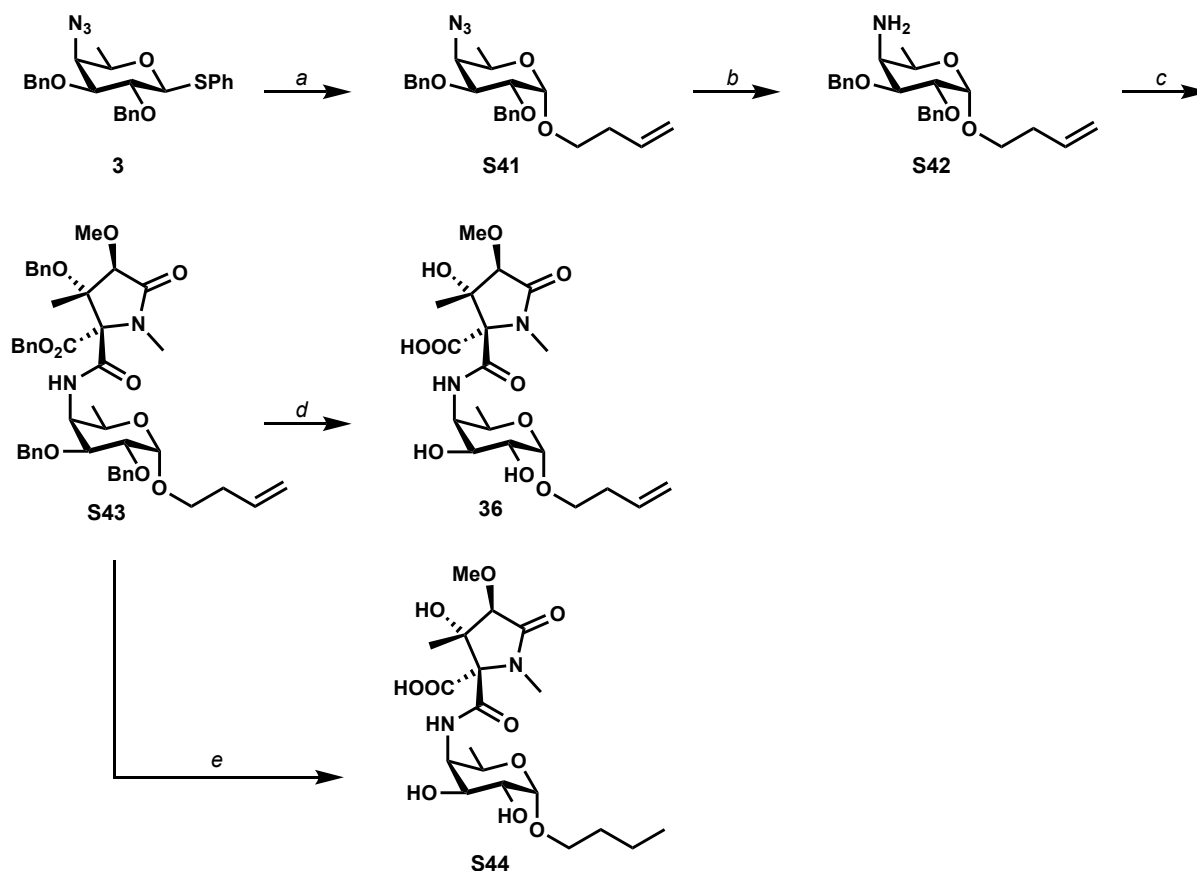

*Reagents and conditions:* a)  $\text{Ph}_2\text{SO}$ , TTBP, ethyl maleimide,  $\text{Tf}_2\text{O}$ , TBAI, 3-buten-1-ol (95%); b) triphenylphosphine, THF (79%); c) pyrrolidone **2**, TEA, HATU,  $\text{CH}_3\text{CN}$  (88%); d) Na,  $\text{NH}_3$ , *t*-BuOH, THF (44%); e)  $\text{H}_2$ ,  $\text{Pd}(\text{OH})_2/\text{C}$ , THF, *t*-BuOH,  $\text{H}_2\text{O}$  (13%).

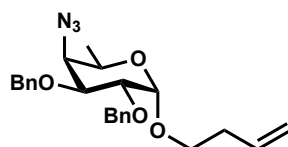

**3-Butene 4-azido-2,3-di-O-benzyl-4,6-dideoxy- $\alpha$ -D-galactopyranoside (S41).** To a solution of the donor **3** (23 mg, 50  $\mu\text{mol}$ , 1 eq.) in DCM (1 mL, 0.05 M),  $\text{Ph}_2\text{SO}$  (13 mg, 65  $\mu\text{mol}$ , 1.3 eq.), TTBP (31 mg, 125  $\mu\text{mol}$ , 2.5 eq.) and ethyl maleimide (12.5 mg, 100  $\mu\text{mol}$ , 2.0 eq) were added. The solution was stirred over activated 3 Å molecular sieves (rods, size 1/16 in., Sigma Aldrich) for 30 min. The solution was cooled to  $-80^\circ\text{C}$  upon which  $\text{Tf}_2\text{O}$  (11  $\mu\text{L}$ , 65  $\mu\text{mol}$ , 1.3 eq.) was added slowly. Subsequently, the solution was allowed to attain to  $-50^\circ\text{C}$  to secure full activation of the donor followed by cooling back to  $-80^\circ\text{C}$  after which TBAI (148 mg, 0.4 mmol, 8 eq.) was added. The solution was stirred for 15 min at  $-80^\circ\text{C}$  followed by the addition of the acceptor 3-buten-1-ol (0.2 mL of a 0.5 M solution, 2.0 eq.). The reaction was stirred for 16 h at  $0^\circ\text{C}$  upon which the reaction was quenched with sat. aq.  $\text{NaHCO}_3$  followed by the dilution with EtOAc. The organic layer was washed with  $\text{H}_2\text{O}$  and brine, dried over  $\text{MgSO}_4$ , filtered off and concentrated under reduced pressure. Flash column chromatography (95:5  $\rightarrow$  92:8; pentane:Et<sub>2</sub>O) yielded the title compound **S41** (19.1 mg, 45  $\mu\text{mol}$ , 95%,  $\alpha$ : $\beta$ ; >98:2) as a colorless oil. TLC:  $R_f$  0.6 (pentane:Et<sub>2</sub>O, 9:1, v:v);  $[\alpha]_D^{20}$  24.3° (c 1.0,  $\text{CHCl}_3$ ); IR (neat,  $\text{cm}^{-1}$ ): 697, 1045, 1105, 1709, 2109, 2916;  $^1\text{H}$  NMR (400 MHz,  $\text{CDCl}_3$ , HH-COSY, HSQC):  $\delta$  7.42 – 7.27 (m, 10H,  $\text{CH}_{\text{arom}}$ ), 5.81 (ddt,  $J = 17.0, 10.2, 6.7$  Hz, 1H, H-9), 5.10 (dq,  $J = 17.2, 1.6$  Hz, 1H, H-10), 5.08 – 5.00 (m, 1H, H-10), 4.85 (d,  $J = 11.7$  Hz, 1H,  $\text{CHH}$  Bn), 4.81 (d,  $J = 12.0$  Hz, 1H,  $\text{CHH}$  Bn), 4.74 (d,  $J = 11.7$  Hz, 1H,  $\text{CHH}$

Bn), 4.70 (d,  $J = 3.8$  Hz, 1H, H-1), 4.64 (d,  $J = 12.0$  Hz, 1H, CHH Bn), 4.03 (dd,  $J = 9.9, 3.7$  Hz, 1H, H-3), 3.96 (qd,  $J = 6.5, 1.6$  Hz, 1H, H-5), 3.83 (dd,  $J = 9.9, 3.8$  Hz, 1H, H-2), 3.72 (dd,  $J = 3.8, 1.5$  Hz, 1H, H-4), 3.56 (ddt,  $J = 44.4, 9.9, 7.0$  Hz, 2H, H-7, H-7), 2.37 (qt,  $J = 7.0, 1.4$  Hz, 2H, H-8, H-8), 1.21 (d,  $J = 6.5$  Hz, 3H, H-6);  $^{13}\text{C}$  NMR (101 MHz,  $\text{CDCl}_3$ , HSQC):  $\delta$  138.6, 138.4 ( $\text{C}_{\text{q- arom}}$ ), 135.1 (C-9), 128.6, 128.5, 128.1, 127.9, 127.9, 127.8 ( $\text{CH}_{\text{arom}}$ ), 116.8 (C-10), 97.5 (C-1), 78.2 (C-3), 76.2 (C-2), 73.6, 73.3 ( $\text{CH}_2$  Bn), 67.7 (C-7), 65.2 (C-4), 64.5 (C-5), 34.0 (C-8), 17.4 (C-6). HRMS:  $[\text{M}+\text{Na}]^+$  calcd for  $\text{C}_{24}\text{H}_{29}\text{O}_4\text{N}_3\text{Na}$  446.2056, found 446.2050.

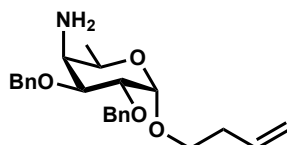

**3-Butene 4-amine-2,3-di-O-benzyl-4,6-dideoxy- $\alpha$ -D-galactopyranoside (S42).** Azide **S41** (42.4 mg, 0.1 mmol, 1 eq.) was dissolved in THF (250  $\mu\text{L}$ , 0.4 M) followed by the addition of polymer bound triphenylphosphine (66.7 mg, 0.2 mmol, 2 eq.; 100-200 mesh, 3 mmol/gr). The mixture was stirred for 3 h at room temperature upon which  $\text{H}_2\text{O}$  (22.6  $\mu\text{L}$ , 1.25 mmol, 12.5 eq.) was added and the reaction was stirred for another 16 h. Upon completion, the reaction was filtered, rinsed with  $\text{CHCl}_3$ , and concentrated *in vacuo* to yield the crude product. Flash column chromatography (10:90  $\rightarrow$  0:100; pentane:EtOAc) yielded the title compound (31.3 mg, 78.7  $\mu\text{mol}$ , 79%) as a colorless oil. TLC:  $R_f$  0.1 (pentane:EtOAc, 1:9, v:v);  $[\alpha]_D^{20}$  39.6° (c 1.0,  $\text{CHCl}_3$ ); IR (neat,  $\text{cm}^{-1}$ ): 698, 1042, 1100, 2928;  $^1\text{H}$  NMR (400 MHz,  $\text{CDCl}_3$ , HH-COSY, HSQC):  $\delta$  7.73 – 7.26 (m, 10H,  $\text{CH}_{\text{arom}}$ ), 5.84 (ddt,  $J = 17.0, 10.2, 6.7$  Hz, 1H, H-9), 5.11 (dq,  $J = 17.2, 1.6$  Hz, 1H, H-10), 5.05 (ddt,  $J = 10.2, 2.1, 1.2$  Hz, 1H, H-10), 4.79 (d,  $J = 12.1$  Hz, 1H, CHH Bn), 4.77 – 4.73 (m, 2H, CHH Bn, H-1), 4.70 – 4.62 (m, 2H, CHH Bn, CHH Bn), 4.02 (qd,  $J = 6.6, 1.7$  Hz, 1H, H-5), 3.86 (dd,  $J = 9.9, 4.0$  Hz, 1H, H-3), 3.74 (dd,  $J = 10.0, 3.9$  Hz, 1H, H-2), 3.59 (ddt,  $J = 55.2, 9.9, 7.0$  Hz, 2H, H-7, H-7), 3.16 (dd,  $J = 4.1, 1.8$  Hz, 1H, H-4), 2.40 (qt,  $J = 7.0, 1.4$  Hz, 2H, H-8, H-8), 1.21 (d,  $J = 6.6$  Hz, 3H, H-6);  $^{13}\text{C}$  NMR (101 MHz,  $\text{CDCl}_3$ , HSQC):  $\delta$  138.8 ( $\text{C}_{\text{q- arom}}$ ), 135.2 (C-9), 128.5, 128.5, 128.0, 127.8, 127.8 ( $\text{CH}_{\text{arom}}$ ), 116.7 (C-10), 97.5 (C-1), 78.6 (C-3), 75.5 (C-2), 73.2, 72.5 ( $\text{CH}_2$  Bn), 67.5 (C-7), 65.3 (C-5), 53.5 (C-4), 34.1 (C-8), 16.8 (C-6); HRMS:  $[\text{M}+\text{H}]^+$  calcd for  $\text{C}_{24}\text{H}_{32}\text{O}_4\text{N}$  398.2331, found 398.2326.

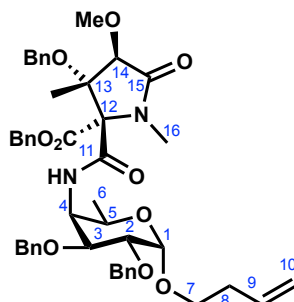

**3-Butene 4-[(2'S,3'S,4'R)-3'-O-Benzyl-2'-(benzyloxycarbonyl)-4'-methoxy-1',3'-dimethyl-5'-oxopyrrolidine-2'-carboxamido] 2,3-di-O-benzyl-4,6-dideoxy- $\alpha$ -D-galactopyranoside (S43).** To a stirred solution of pyrrolidone **2** (63.7 mg, 154  $\mu\text{mol}$ , 1.25 eq.) and triethylamine (42.7  $\mu\text{L}$ , 308  $\mu\text{mol}$ , 2.5 eq.) in  $\text{CH}_3\text{CN}$  (0.4 mL, 0.15 M) was added HATU (62 mg, 163  $\mu\text{mol}$ , 1.3 eq.). The solution was stirred for 30 min at room temperature followed by the addition of galactosamine **S42** in 0.4 mL  $\text{CH}_3\text{CN}$ . The reaction was stirred for 3 h at room temperature upon which 1M HCl and EtOAc were added. The aqueous layer was extracted with EtOAc (3x) followed by washing the combined organic layers with  $\text{H}_2\text{O}$ , sat. aq.  $\text{NaHCO}_3$  and brine, respectively. Subsequently, the organic layer was dried over  $\text{MgSO}_4$ , filtered, and concentrated *in vacuo* to yield the crude product as a colorless oil. Flash column chromatography (80:20  $\rightarrow$  60:40; pentane:EtOAc) yielded the title compound (86 mg, 108  $\mu\text{mol}$ , 88%) as a colorless oil. TLC:  $R_f$  0.6 (pentane:EtOAc, 1:1, v:v);  $[\alpha]_D^{20}$  79.4° (c 1.0,  $\text{CHCl}_3$ ); IR (neat,  $\text{cm}^{-1}$ ): 698, 1046, 1097, 1686, 1717, 2926;  $^1\text{H}$  NMR (400 MHz,  $\text{CDCl}_3$ , HH-COSY, HSQC):  $\delta$  8.13 (d,  $J = 10.0$  Hz, 1H, NH), 7.38 – 7.13 (m, 20H,  $\text{CH}_{\text{arom}}$ ), 5.84 (ddt,  $J = 17.0, 10.2, 6.7$  Hz, 1H, H-9), 5.17 (d,  $J = 12.1$  Hz,



1H, *CHH* Bn), 5.15 – 5.04 (m, 3H, *CHH* Bn, H-10, H-10), 4.84 (d, *J* = 10.9 Hz, 1H, *CHH* Bn), 4.78 (d, *J* = 12.2 Hz, 1H, *CHH* Bn), 4.74 (d, *J* = 3.9 Hz, 1H, H-1), 4.61 (d, *J* = 6.3 Hz, 1H, *CHH* Bn), 4.60 – 4.51 (m, 3H, *CHH* Bn, *CHH* Bn, H-4), 4.35 (d, *J* = 11.6 Hz, 1H, *CHH* Bn), 4.18 (tt, *J* = 7.4, 3.5 Hz, 1H, H-5), 3.98 (dd, *J* = 10.1, 4.1 Hz, 1H, H-3), 3.84 (s, 1H, H-14), 3.72 – 3.62 (m, 1H, H-7), 3.59 – 3.48 (m, 5H, H-2, H-7, CH<sub>3</sub> OMe), 2.65 (s, 3H, CH<sub>3</sub> NMe), 2.40 (qt, *J* = 7.0, 1.4 Hz, 2H, H-8), 1.45 (s, 3H, CH<sub>3</sub>), 1.15 (d, *J* = 6.5 Hz, 3H, H-6); <sup>13</sup>C NMR (101 MHz, CDCl<sub>3</sub>, HSQC): δ 172.4 (C=O ester), 168.8, 164.7 (C=O amide), 138.8, 138.7, 137.8 (C<sub>q</sub>-arom), 135.0 (C-9), 134.7 (C<sub>q</sub>-arom), 128.8, 128.7, 128.5, 128.5, 128.4, 128.2, 128.1, 127.9, 127.7, 127.5, 127.1 (CH<sub>arom</sub>), 116.9 (C-10), 97.6 (C-1), 83.9 (C-13), 82.4 (C-14), 79.5 (C-12), 77.6 (C-3), 75.6 (C-2), 73.4, 71.9, 68.3 (CH<sub>2</sub> Bn), 67.8 (C-7), 66.3 (CH<sub>2</sub> Ph), 64.2 (C-5), 59.5 (CH<sub>3</sub> OMe), 52.0 (C-4), 34.0 (C-8), 29.2 (CH<sub>3</sub> NMe), 17.4 (C-6), 14.8 (CH<sub>3</sub>); HRMS: [M+H]<sup>+</sup> calcd for C<sub>47</sub>H<sub>55</sub>O<sub>10</sub>N<sub>2</sub> 807.3857, found 807.3851.

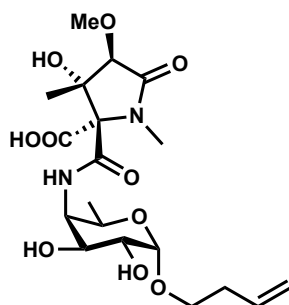

**3-Butene 4-[(2'*S*,3'*S*,4'*R*)-2'-carboxyl-3'-hydroxy-4'-methoxy-1',3'-dimethyl-5'-oxopyrrolidine-2'-carboxamido]-4,6-dideoxy- $\alpha$ -D-galactopyranoside (36).** The protected galactopyranoside **S43** (19.8 mg, 25  $\mu$ mol) was co-evaporated twice with dry toluene. 20 mL ammonia was condensed at  $-70$   $^{\circ}$ C, sodium (22.5 mg, 0.98 mmol, 40 eq.) was added and the resulting suspension was stirred for 30 min. Galactopyranoside was dissolved in 4 mL THF, 3-buten-1-ol (100  $\mu$ L, used for scales from 10-100  $\mu$ mol) and *t*-BuOH (24  $\mu$ L, 250  $\mu$ mol, 10 eq.) and the solution was added to the suspension of sodium in ammonia. The reaction mixture was stirred at  $-70$   $^{\circ}$ C for 15 min, upon which the reaction was quenched with water. The reaction mixture was then stirred at room temperature until all ammonia had evaporated. The mixture was concentrated *in vacuo* to yield the crude product as a colorless oil. Flash column chromatography (30:70  $\rightarrow$  50:50; MeOH:DCM) yielded the title compound (4.9 mg, 11  $\mu$ mol, 44%) as a colorless oil. TLC: R<sub>f</sub> 0.2 (DCM:MeOH, 7:3, v:v); The NMR data showed the presence of two atropisomers in D<sub>2</sub>O in a 60:40 ratio. Data for atropisomeric mixture: <sup>1</sup>H NMR (500 MHz, D<sub>2</sub>O, HH-COSY, HSQC): δ 5.89 (ddt, *J* = 17.1, 10.4, 6.7 Hz, 1H, H-9), 5.15 (dt, *J* = 17.3, 1.9 Hz, 1H, H-10), 5.11 – 5.06 (m, 1H, H-10), 4.98 – 4.93 (m, 1H, H-1), 4.30 (ddd, *J* = 13.0, 6.5, 1.6 Hz, 1H, H-5), 4.24 – 4.21 (m, 1H, H-4), 4.15 – 4.13 (m, 0.4H, H-14\*), 4.03 (ddd, *J* = 10.8, 6.7, 4.2 Hz, 1H, H-3), 3.91 (t, *J* = 0.7 Hz, 0.6H, H-14), 3.74 (dt, *J* = 10.0, 6.8 Hz, 1H, H-7), 3.68 – 3.57 (m, 5H, H-2, H-7, OCH<sub>3</sub>), 2.80 – 2.74 (m, 3H, NMe), 2.39 (d, *J* = 6.6 Hz, 2H, H-8), 1.56 (s, 1.8H, CH<sub>3</sub>), 1.24 – 1.17 (m, 4.2H, H-6, CH<sub>3</sub>\*); <sup>13</sup>C NMR (126 MHz, D<sub>2</sub>O, HSQC): δ 174.8 (C=O acid), 173.9 (C=O acid\*), 171.7 (C=O amide), 171.3, 168.6 (C=O amide\*), 167.9 (C=O amide), 135.7 (C-9), 116.7 (C-10), 98.4 (C-1), 84.7 (C-14\*), 83.1 (C-14), 79.4 (C-13\*), 76.2 (C-13), 69.2 (C-3\*), 69.0 (C-3), 68.7 (OCH<sub>3</sub>), 68.5 (OCH<sub>3</sub>\*), 67.8 (C-7), 65.7 (C-5), 65.2 (C-5\*), 60.8 (C-2), 60.0 (C-2\*), 54.9 (C-4\*), 54.6 (C-4), 33.2 (C-8), 29.8 (NMe\*), 29.7 (NMe), 22.5 (CH<sub>3</sub>), 18.2 (CH<sub>3</sub>\*), 16.3 (C-6\*), 16.0 (C-6); HRMS: [M+H]<sup>+</sup> calcd for C<sub>19</sub>H<sub>31</sub>O<sub>10</sub>N<sub>2</sub> 447.1979, found 447.1973.

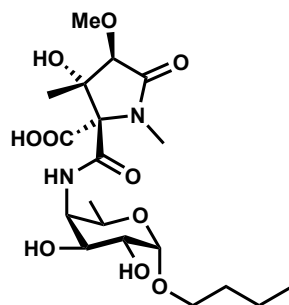

**Butane 4-[(2'S,3'S,4'R)-2'-carboxyl-3'-hydroxy-4'-methoxy-1',3'-dimethyl-5'-oxopyrrolidine-2'-carboxamido]-4,6-dideoxy- $\alpha$ -D-galactopyranoside (S44).** The protected galactopyranoside **S43** (19.8 mg, 25  $\mu$ mol) was co-evaporated twice with dry toluene. It was then dissolved in 5 mL of a mixture of THF, *t*-BuOH and water (13:13:30). 3 drops of acetic acid were added and the solution was treated with palladium hydroxide on charcoal (52.7 mg, 20 % loading, Sigma-Aldrich) and subjected to hydrogen atmosphere for 20 h. The mixture was filtered through Celite<sup>®</sup> Hyflo Supercel (Merck) and the filtrate was concentrated *in vacuo*. Flash column chromatography (C18 column, gradient 100:0  $\rightarrow$  50:50 CH<sub>3</sub>OH–H<sub>2</sub>O) yielded the title compound (1.5 mg, 3.4  $\mu$ mol, 13%) as a white solid. TLC: R<sub>f</sub> 0.2 (DCM:MeOH, 7:3, v:v); The NMR data showed the presence of two atropisomers in D<sub>2</sub>O in a 60:40 ratio. Data for atropisomeric mixture: <sup>1</sup>H NMR (850 MHz, D<sub>2</sub>O, HH-COSY, HSQC):  $\delta$  5.00 – 4.97 (m, 1H, H-1), 4.36 – 4.30 (m, 1H, H-5), 4.27 – 4.25 (m, 1H, H-4), 4.17 (s, 0.4H, H-14\*), 4.09 – 4.05 (m, 1H, H-3), 3.95 (s, 0.6H, H-14), 3.75 – 3.55 (m, 6H, H-2, H-7, OMe), 2.83 – 2.80 (m, 3H, NMe), 1.68 – 1.58 (m, 3.8H, H-8, CH<sub>3</sub>), 1.45 – 1.36 (m, 2H, H-9), 1.27 – 1.21 (m, 4.2H, H-6, CH<sub>3</sub>\*), 0.93 (t, *J* = 7.4 Hz, 3H, H-10); <sup>13</sup>C NMR (214 MHz, D<sub>2</sub>O, HSQC):  $\delta$  174.7, 173.9 (C=O acid, C=O acid\*), 171.6, 171.3, 168.5, 167.9 (C=O amide, C=O amide\*), 98.3 (C-1\*), 98.3 (C-1), 84.6 (C-14\*), 83.1 (C-14), 81.3, 79.5 (C-14/C-13), 79.3, 76.2 (C-13/C-14, C-13\*/C-14), 69.2 (C-3\*), 69.0 (C-3), 68.6 (C-2), 68.4 (C-2\*), 68.4 (C-7), 65.5 (C-5), 65.0 (C-5\*), 60.8 (OCH<sub>3</sub>), 59.9 (OCH<sub>3</sub>\*), 54.8 (C-4\*), 54.6 (C-4), 30.7 (C-8), 29.7 (NMe\*), 29.7 (NMe), 22.4 (CH<sub>3</sub>), 18.7 (C-9), 18.1 (CH<sub>3</sub>\*), 16.3 (C-6\*), 16.0 (C-6), 13.0 (C-10); HRMS: [M+H]<sup>+</sup> calcd for C<sub>19</sub>H<sub>33</sub>O<sub>10</sub>N<sub>2</sub> 449.2135, found 449.2130.

### Synthesis of compound 37

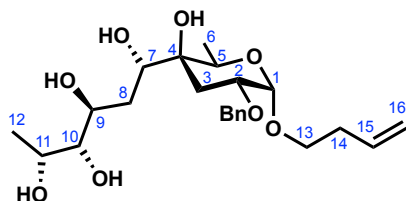

**3-Butene caryophylloside (37).** The protected glycoside **30** (33 mg, 50  $\mu$ mol) was dissolved in 10 mL 1:1 v:v THF:H<sub>2</sub>O (0.005 M). LiOH·H<sub>2</sub>O (210 mg, 5.0 mmol, 100 eq.) was added and the resulting mixture was stirred at rt for 20 h. Upon completion 80% of the LiOH was quenched with 0.1 M HCl (40 mL) and the mixture was concentrated under reduced pressure to yield the crude product. The crude product was then co-evaporated twice with dry toluene. 3 mL ammonia was condensed at –70 °C, sodium (23 mg, 1.0 mmol, 20 eq.) was added and the resulting suspension was stirred for 30 min. The crude product was dissolved in 0.5 mL THF, 3-butenol (50  $\mu$ L, 1.0 mmol, 20 eq.) and *t*-BuOH (50  $\mu$ L, 500  $\mu$ mol, 10 eq.) and the solution was added to the suspension of sodium in ammonia. The reaction mixture was stirred at –70 °C for 15 min, upon which the reaction was quenched with water. The reaction mixture was then stirred at room temperature until all ammonia had evaporated. The mixture was concentrated *in vacuo* to yield the crude product as a colourless oil. Flash column chromatography (5:95  $\rightarrow$  20:80; MeOH:DCM) followed by size exclusion over a 250x10 mm column filled with Biogel P2 media (Bio-Rad) yielded the title compound (4.6 mg, 13  $\mu$ mol, 26% over two steps) as a colourless oil. <sup>1</sup>H NMR (500 MHz, D<sub>2</sub>O, HH-COSY, HSQC):  $\delta$  5.90 (ddt, *J* = 17.1, 10.3, 6.7 Hz, 1H, H-15), 5.16 (dq, *J* = 17.3, 1.7 Hz, 1H, H-16), 5.08 (dd, *J* = 10.3, 2.1 Hz, 1H, H-16), 4.80 (H-1, value from HSQC due to overlap with the solvent signal) 4.25 (q, *J* = 6.5 Hz, 1H, H-5), 3.98 (ddd, *J* = 12.3, 5.1, 3.7 Hz, 1H, H-2), 3.93 (dt, *J* = 12.5, 6.3 Hz, 1H, H-11), 3.81 (td, *J* = 7.4, 6.2, 2.2 Hz, 1H, H-9), 3.77 – 3.70 (m, 2H, H-7, H-13), 3.63

(dt,  $J = 9.8, 5.9$  Hz, 1H, H-1'), 3.50 (t,  $J = 5.9$  Hz, 1H, H-10), 2.43 – 2.36 (m, 2H, H-14), 1.93 (t,  $J = 12.6$  Hz, 1H, H-3), 1.77 – 1.61 (m, 3H, H-3, H-8), 1.20 (d,  $J = 6.4$  Hz, 3H, H-12), 1.13 (d,  $J = 6.6$  Hz, 3H, H-6);  $^{13}\text{C}$  NMR (126 MHz, D<sub>2</sub>O, HSQC):  $\delta$  135.9 (C-15), 116.6 (C-16), 97.1 (C-1), 77.4 (C-10), 74.8 (C-4), 69.6 (C-7), 67.9 (C-9), 67.5 (C-11), 67.1 (C-13), 66.9 (C-5), 64.6 (C-2), 33.3 (C-14), 31.9 (C-8), 30.4 (C-3), 16.9 (C-12), 11.3 (C-6); HRMS:  $[\text{M}+\text{Na}]^+$  calcd for C<sub>16</sub>H<sub>30</sub>O<sub>8</sub>Na 373.1838, found 373.1833.

## Preparation of model acceptors

### Synthesis of acceptor 28

**Scheme S7.** Synthesis of compound **28**.

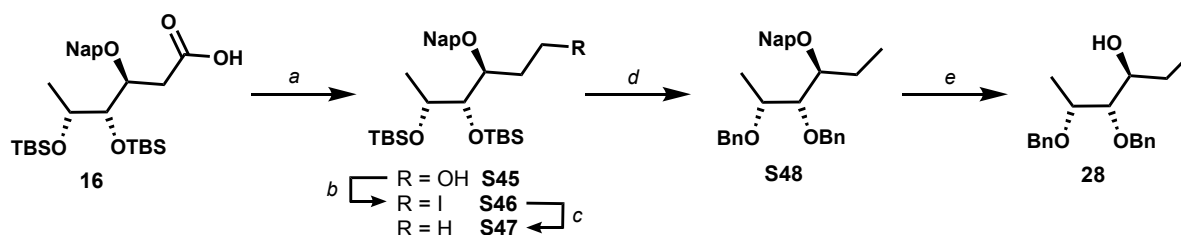

**Reagents and conditions:** a) BH<sub>3</sub>·THF, THF (75%); b) triphenylphosphine, imidazole, iodine, THF (92%); c) LiAlH<sub>4</sub>, THF (72%); d) i: HF-pyridine, pyridine; ii: NaH, BnBr, DMF (91%); e) DDQ, DCM (67%).

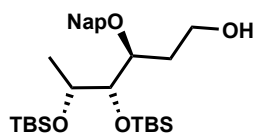

#### **2,6-Dideoxy-3-O-(2-methylnaphthalene)-4,5-O-di-tert-butylidimethylsilyl-D-altritol (S45).**

Carboxylate **16** (2.96 g, 5.5 mmol) was dissolved in THF (10 mL), followed by adding BH<sub>3</sub>·THF (17 mL, 1.0 M in THF, 3.0 eq) at 0 °C. The reaction mixture was left stirring at room temperature for 16 h, after which it was concentrated *in vacuo* to a thick syrup, which was absorbed on silica gel and chromatographed using pentane:Et<sub>2</sub>O (75:25) as a mobile phase. The product was obtained as a clear oil (2.1 g, 75%). TLC: R<sub>f</sub> 0.3 (pentane:Et<sub>2</sub>O, 75:25);  $^1\text{H}$  NMR (300 MHz, CDCl<sub>3</sub>, HH-COSY, HSQC):  $\delta$  7.89 – 7.80 (m, 4H, CH<sub>arom</sub>), 7.53 – 7.47 (m, 3H, CH<sub>arom</sub>), 4.83 (d,  $J = 12.3$  Hz, 1H, CHH Nap), 4.64 (d,  $J = 12.3$  Hz, 1H, CHH Nap), 3.92 (m, 1H, H-3), 3.81 – 3.71 (m, 4H, H-5, H-4, H-1 x 2), 1.98 (m, 1H, H-2<sub>a</sub>), 1.78 (m, 1H, H-2<sub>b</sub>), 1.21 (d,  $J = 6.9$  Hz, 3H, H-6), 0.93 (s, 9H, C(CH<sub>3</sub>)<sub>3</sub>), 0.87 (s, 9H, C(CH<sub>3</sub>)<sub>3</sub>), 0.16 – 0.03 (m, 12H, SiCH<sub>3</sub>, SiCH<sub>3</sub>, SiCH<sub>3</sub>, SiCH<sub>3</sub>);  $^{13}\text{C}$  NMR (75 MHz, CDCl<sub>3</sub>, HSQC):  $\delta$  135.5, 133.2, 133.0 (C<sub>q-arom</sub>), 128.3, 127.9, 127.9, 127.7, 127.7, 127.7, 126.8, 126.8, 126.8, 126.1, 126.0, 125.9 (CH<sub>arom</sub>), 79.5 (C-3), 77.8, 71.6 (CH<sub>2</sub> Nap), 69.6, 69.6, 60.8 (C-1), 31.1 (C-2), 26.1 (C(CH<sub>3</sub>)<sub>3</sub>), 26.1 (C(CH<sub>3</sub>)<sub>3</sub>), 25.8 (C(CH<sub>3</sub>)<sub>3</sub>), 20.8 (C-6), -3.9, -4.0, -4.4, -4.5, -4.8 (SiCH<sub>3</sub>); HRMS:  $[\text{M}+\text{H}]^+$  calcd for C<sub>29</sub>H<sub>51</sub>O<sub>4</sub>Si<sub>2</sub> 519.3326, found 519.3323.

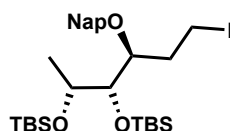

#### **2,6-Dideoxy-1-deoxy-1-iodo-3-O-(2-methylnaphthalene)-4,5-O-di-tert-butylidimethylsilyl-D-altritol (S46).**

Alcohol **S45** (2.1 g, 4.04 mmol) was dissolved in THF (10 mL), followed by adding imidazole (884 mg, 13 mmol, 1.5 eq), PPh<sub>3</sub> (1.75 g, 6.07 mmol, 1.5 eq.), and I<sub>2</sub> (1.5 g, 6.07 mmol, 1.5 eq.) sequentially at rt. The reaction mixture was heated at 60 °C for 1 h, after which it was quenched with sat. Na<sub>2</sub>S<sub>2</sub>O<sub>3</sub>, diluted with CH<sub>2</sub>Cl<sub>2</sub> and washed with H<sub>2</sub>O. The organic layer was then dried over MgSO<sub>4</sub>, filtered, and concentrated *in vacuo* to give the crude product as an oil, which was loaded on silica gel and chromatographed using pentane:Et<sub>2</sub>O (90:10) as a mobile phase. The product was obtained as a clear oil (2.32 g, 92%). TLC: R<sub>f</sub> 0.7 (pentane:Et<sub>2</sub>O, 75:25);  $^1\text{H}$  NMR (300 MHz, CDCl<sub>3</sub>, HH-COSY, HSQC):  $\delta$

7.89 – 7.82 (m, 4H, CH<sub>arom</sub>), 7.54 – 7.48 (m, 3H, CH<sub>arom</sub>), 4.85 (d, *J* = 12.3 Hz, 1H, CHH Nap), 4.66 (d, *J* = 12.3 Hz, 1H, CHH Nap), 3.80 (m, 1H, H-5), 3.74 (m, 2H, H-4, H-3), 3.40 (m, 1H, CHH I), 3.28 (m, 1H, CHH I), 1.21 (d, *J* = 6.9 Hz, 3H, H-6), 0.93 (s, 9H, C(CH<sub>3</sub>)<sub>3</sub>), 0.87 (s, 9H, C(CH<sub>3</sub>)<sub>3</sub>), 0.16 – 0.03 (m, 12H, SiCH<sub>3</sub>, SiCH<sub>3</sub>, SiCH<sub>3</sub>, SiCH<sub>3</sub>); <sup>13</sup>C NMR (75 MHz, CDCl<sub>3</sub>, HSQC): δ 135.9, 133.3, 132.9 (C<sub>q-*arom*</sub>), 128.1, 127.9, 127.7, 126.5, 126.0, 126.0, 125.8 (CH<sub>arom</sub>), 80.3, 78.0, 72.3 (CH<sub>2</sub> Nap), 69.7 (C-5), 34.2 (C-2), 26.1(C(CH<sub>3</sub>)<sub>3</sub>), 26.0 (C(CH<sub>3</sub>)<sub>3</sub>), 20.5 (C-6), 4.1 (CH<sub>2</sub>I), -3.9, -4.1, -4.4, -4.5 (SiCH<sub>3</sub>); HRMS: [M+H]<sup>+</sup> calcd for C<sub>29</sub>H<sub>50</sub>I<sub>3</sub>O<sub>3</sub>Si<sub>2</sub> 629.2342, found 629.2337.

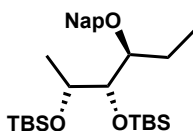

**1,2,6-Trideoxy-3-O-(2-methylnaphthalene)-4,5-O-di-*tert*-butyldimethylsilyl-D-altritol (S47).** Iodide **S46** (2.32 g, 3.75 mmol) was dissolved in dry THF (20 mL), and LiAlH<sub>4</sub> (1.5 mL, 4.0 M in Et<sub>2</sub>O, 1.5 eq.) was added at 0 °C, and the reaction mixture was then left stirring at room temperature for 1 h. It was then carefully quenched with H<sub>2</sub>O, after which saturated solution of Rochelle's salt was added, and stirring was continued at room temperature for 1 h. The reaction mixture was then diluted with Et<sub>2</sub>O, and the organic layer was separated and dried over MgSO<sub>4</sub>, filtered, and concentrated *in vacuo* to give the crude product as an oil, which was loaded on silica gel and chromatographed using pentane:Et<sub>2</sub>O (90:10) as a mobile phase. The product was obtained as a clear oil (1.35 g, 72%). TLC: R<sub>f</sub> 0.7 (pentane:Et<sub>2</sub>O, 75:25); <sup>1</sup>H NMR (300 MHz, CDCl<sub>3</sub>, HH-COSY, HSQC): δ 7.87 – 7.82 (m, 4H, CH<sub>arom</sub>), 7.52 – 7.45 (m, 3H, CH<sub>arom</sub>), 4.77 (d, *J* = 12.3 Hz, 1H, CHH Nap), 4.65 (d, *J* = 12.3 Hz, 1H, CHH Nap), 3.92 (m, 1H, H-5), 3.73 (dd, *J* = 4.3, 4.8 Hz, 1H, H-4), 3.50 (m, 1H, H-3), 1.65 (m, 2H, H-2), 1.17 (d, 3H, *J* = 5.8 Hz, H-6), 1.00 (t, *J* = 7.5 Hz, 3H, H-1), 0.93 (s, 9H, C(CH<sub>3</sub>)<sub>3</sub>), 0.87 (s, 9H, C(CH<sub>3</sub>)<sub>3</sub>), 0.16 – 0.03 (m, 12H, SiCH<sub>3</sub>, SiCH<sub>3</sub>, SiCH<sub>3</sub>, SiCH<sub>3</sub>); <sup>13</sup>C NMR (75 MHz, CDCl<sub>3</sub>, HSQC): δ 136.5, 133.3, 132.9 (C<sub>q-*arom*</sub>), 127.9, 127.7, 126.2, 126.0, 125.9, 125.6 (CH<sub>arom</sub>), 81.7 (C-3), 78.2 (C-4), 71.9 (CH<sub>2</sub> Nap), 69.6 (C-5), 26.1 (C(CH<sub>3</sub>)<sub>3</sub>), 26.0 (C(CH<sub>3</sub>)<sub>3</sub>), 22.3 (C-2), 19.6 (C-6), 10.1 (C-1), -4.2, -4.2, -4.4, -4.7 (SiCH<sub>3</sub>); HRMS: [M+H]<sup>+</sup> calcd for C<sub>29</sub>H<sub>51</sub>O<sub>3</sub>Si<sub>2</sub> 503.3377, found 503.3374.

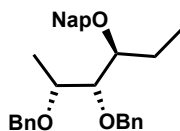

**1,2,6-Trideoxy-3-O-(2-methylnaphthalene)-4,5-di-O-benzyl-D-altritol (S48).** To a solution of compound **S47** (830 mg, 1.65 mmol) in pyridine (5 mL) was added a solution of HF-pyridine (5 mL, 5 mL of 70% HF-pyridine diluted with 5 mL of pyridine), and the reaction mixture was left stirring at rt for 16 h. The reaction mixture was diluted with CH<sub>2</sub>Cl<sub>2</sub>, washed with water, sat. NaHCO<sub>3</sub>, and the organic phase was separated, dried over MgSO<sub>4</sub>, filtered, and concentrated *in vacuo* to give the crude intermediate as an oil. This material was dissolved in DMF (10 mL), after which BnBr (600 μL, 5 mmol, 3.0 eq) and NaH (200 mg, 5.0 mmol, 3.0 eq) were added at 0 °C, and the reaction mixture was left stirring at room temperature for 4 h, after which it was quenched with methanol, concentrated *in vacuo*, loaded on silica gel, and chromatographed using hexane:EtOAc (90:10) as a mobile phase to give the desired product as a clear oil (710 mg, 91% over two steps). TLC: R<sub>f</sub> 0.7 (pentane:EtOAc, 75:25); <sup>1</sup>H NMR (300 MHz, CDCl<sub>3</sub>, HH-COSY, HSQC): δ 7.89 – 7.79 (m, 4H, CH<sub>arom</sub>), 7.54 – 7.47 (m, 3H, CH<sub>arom</sub>), 7.42 – 7.38 (m, 9H, CH<sub>arom</sub>), 4.85 (d, *J* = 11.5 Hz, 1H, CHH Bn), 4.80 (d, *J* = 11.5 Hz, 1H, CHH Bn), 4.74 (s, 2H, CH<sub>2</sub>Ar), 4.65 (d, *J* = 12.2 Hz, 1H, CHH Bn), 4.52 (d, *J* = 12.2 Hz, 1H, CHH Bn), 3.86 – 3.76 (m, 2H, H-4, H-5), 3.63 (m, 1H, H-3), 1.74 (m, 2H, H-2), 1.32 (d, *J* = 6.1 Hz, 2H, H-2), 0.99 (t, *J* = 7.4 Hz, 3H, H-1); <sup>13</sup>C NMR (75 MHz, CDCl<sub>3</sub>) δ 138.9, 138.8, 136.2, 133.3, 132.9 (C<sub>q-*arom*</sub>), 128.3, 128.3, 128.0, 128.0, 127.9, 127.7, 127.6, 127.5, 126.5, 126.1, 126.0, 125.8 (CH<sub>arom</sub>), 81.6 (C-5), 80.5 (C-3), 75.5 (C-4), 73.9 (CH<sub>2</sub>Ar), 71.8 (CH<sub>2</sub>Ar), 70.8 (CH<sub>2</sub>Ar), 22.7 (C-2), 15.4 (C-6), 9.8 (C-1); HRMS: [M+H]<sup>+</sup> calcd for C<sub>31</sub>H<sub>35</sub>O<sub>3</sub> 455.2586, found 455.2580.

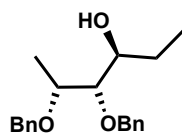

**1,2,6-Trideoxy-4,5-di-O-benzyl-D-altritol (28).** To a solution of **S48** (740 mg, 1.62 mmol) in  $\text{CH}_2\text{Cl}_2$  (10 mL) was added water (1 mL) and DDQ (544 mg, 2.44 mmol, 1.5 eq) at rt. The reaction mixture was left stirring at that temperature for 1 h, after which it was quenched with sat.  $\text{NaHCO}_3$ . The organic phase was separated, dried over  $\text{MgSO}_4$ , and concentrated *in vacuo* to give a crude product. Column chromatography on silica gel using pentane: $\text{Et}_2\text{O}$  (90:10) gave the title product as a clear oil (340 mg, 67%). TLC:  $R_f$  0.7 (pentane: $\text{EtOAc}$ , 75:25);  $^1\text{H}$  NMR (300 MHz,  $\text{CDCl}_3$ , HH-COSY, HSQC):  $\delta$  7.39 – 7.29 (m, 10H,  $\text{CH}_{\text{arom}}$ ), 4.77 (d,  $J$  = 11.4 Hz, 1H, CHH Bn), 4.69 (d,  $J$  = 5.5 Hz, 1H, CHH Bn), 4.65 (d,  $J$  = 5.5 Hz, 1H, CHH Bn), 4.51 (d,  $J$  = 11.4 Hz, 1H, CHH Bn), 3.83 (m, 1H, H-5), 3.71 (m, 1H, H-3), 3.42 (m,  $J$  = 5.1 Hz, 1H, H-4), 1.73 (m, 1H, H-2<sub>a</sub>), 1.50 (m, 1H, H-2<sub>b</sub>), 1.37 (d,  $J$  = 6.4 Hz, 3H, H-6), 1.00 (t,  $J$  = 7.0 Hz, 3H, H-1);  $^{13}\text{C}$  NMR (75 MHz,  $\text{CDCl}_3$ ):  $\delta$  128.4, 128.4, 127.9, 127.7, 127.7, 127.6 ( $\text{CH}_{\text{arom}}$ ), 84.1 (C-4), 76.6 (C-5), 74.2 (C-3), 74.1 ( $\text{CH}_2\text{Ar}$ ), 70.7 ( $\text{CH}_2\text{Ar}$ ), 26.0 (C-2), 16.1 (C-6), 10.3 (C-1); HRMS:  $[\text{M}+\text{H}]^+$  calcd for  $\text{C}_{20}\text{H}_{27}\text{O}_3$  315.1960, found 319.1955.

## Synthesis of acceptor 29

**Scheme S8.** Synthesis of compound 29.

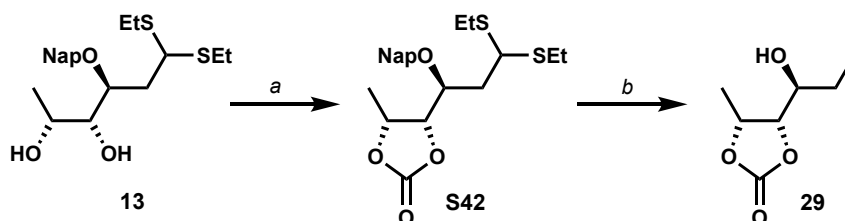

**Reagents and conditions:** a)  $\text{BH}_3\cdot\text{THF}$ , THF (75%); b) triphenylphosphine, imidazole, iodine, THF (92%); c)  $\text{LiAlH}_4$ , THF (72%); d) i: HF-pyridine, pyridine; ii: NaH, BnBr, DMF (91%); e) DDQ, DCM (67%).

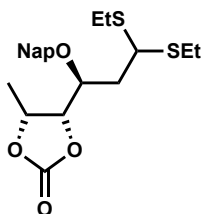

**2,6-Dideoxy-1,1-diethyl-thioacetal-3-O-(2-methylnaphthalene)-4,5-O-carbonate-D-altritol (S42).** A phosgene solution was prepared by diluting a 20% phosgene in hexane solution (1.35 mL) with dry THF (1.5 mL). **13** (190 mg, 0.50 mmol) was dissolved in THF (3.6 mL, 0.1 M) and  $\text{Et}_3\text{N}$  (346  $\mu\text{L}$ , 2.5 mmol, 5.0 eq.) and cooled on ice. The phosgene solution was added dropwise after which the solution was stirred for 3 h at room temperature. The reaction was quenched by adding 1 mL of sat. aq.  $\text{NaHCO}_3$  followed by diluting the mixture with  $\text{Et}_2\text{O}$  and water. The aqueous layer was extracted with  $\text{Et}_2\text{O}$  (3x) followed by washing the combined organic layers with  $\text{H}_2\text{O}$ , sat. aq.  $\text{NaHCO}_3$  and brine respectively. Subsequently, the organic layer was dried over  $\text{MgSO}_4$ , filtered and concentrated *in vacuo* to yield the crude product as a colourless oil. Flash column chromatography (99:1  $\rightarrow$  70:30; pentane: $\text{Et}_2\text{O}$ ) yielded the title compound (150 mg, 0.37 mmol, 74%) as a colourless oil. TLC:  $R_f$  0.2 (pentane: $\text{Et}_2\text{O}$ , 8:2, v:v); IR (neat,  $\text{cm}^{-1}$ ): 817, 1092, 1125, 1348, 1804, 2870, 2928, 2970;  $^1\text{H}$  NMR (500 MHz,  $\text{CDCl}_3$ , HH-COSY, HSQC):  $\delta$  7.92 – 7.38 (m, 7H,  $\text{CH}_{\text{arom}}$ ), 4.98 – 4.87 (m, 1H, H-5), 4.85 (d,  $J$  = 11.5 Hz, 1H, CHH Nap), 4.76 (d,  $J$  = 11.5 Hz, 1H, CHH Nap), 4.72 (t,  $J$  = 7.1 Hz, 1H, H-4), 4.21 (ddd,  $J$  = 6.8, 6.1, 5.0 Hz, 1H, H-3), 3.98 (dd,  $J$  = 7.9, 6.8 Hz, 1H, H-1), 2.77 – 2.54 (m, 4H,  $\text{SCH}_2\text{CH}_3$ ,  $\text{SCH}_2\text{CH}_3$ ), 2.30 (ddd,  $J$  = 15.0, 6.8, 6.1 Hz, 1H, H-2), 2.18 (ddd,  $J$  = 15.0, 7.9, 5.0 Hz, 1H, H-2), 1.49 (d,  $J$  = 6.6 Hz, 3H, H-6), 1.25 (td,  $J$  = 7.4, 2.2 Hz, 6H,  $\text{SCH}_2\text{CH}_3$ ,  $\text{SCH}_2\text{CH}_3$ );  $^{13}\text{C}$  NMR (126 MHz,  $\text{CDCl}_3$ , HSQC):  $\delta$  154.1 ( $\text{O}(\text{C}=\text{O})\text{O}$ ),

134.8, 133.3, 133.2 (C<sub>q-arom</sub>), 128.5, 128.0, 127.8, 126.8, 126.5, 126.3, 125.7 (CH<sub>arom</sub>), 80.1 (C-4), 76.2 (C-5), 74.6 (C-3), 72.5 (CH<sub>2</sub> Nap), 47.3 (C-1), 38.5 (C-2), 24.5 (SCH<sub>2</sub>CH<sub>3</sub>), 24.1 (SCH<sub>2</sub>CH<sub>3</sub>), 15.2 (C-6), 14.4 (SCH<sub>2</sub>CH<sub>3</sub>); HRMS: [M+Na]<sup>+</sup> calcd for C<sub>22</sub>H<sub>28</sub>O<sub>4</sub>NaS<sub>2</sub> 443.1321, found 443.1320.

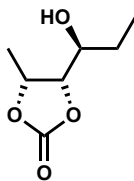

**1,2,6-trideoxy-4,5-O-carbonate-D-altritol (29).** **S49** was converted to **29** according to a modified literature procedure.[Sommer, R.; Exner, T. E.; Titz, A. A Biophysical Study with Carbohydrate Derivatives Explains the Molecular Basis of Monosaccharide Selectivity of the Pseudomonas Aeruginosa Lectin LecB. *PLOS ONE* 2014, 9 (11)] **S49** (100 mg, 0.24 mmol) was dissolved in 3 mL EtOH and 1 mL H<sub>2</sub>O, followed by the addition of sodium hypophosphite monohydrate (0.25 g, 2.38 mmol, 10 eq.) in 1 mL EtOH. Subsequently, 20 spoon tips of pre-washed (with H<sub>2</sub>O; pH ± 7) Raney<sup>®</sup>-Nickel (Sigma-Aldrich, W.R. Grace and Co. Raney<sup>®</sup> 2800, slurry, in H<sub>2</sub>O, active catalyst) was added. The resulting suspension was stirred for 16 h at room temperature and the work-up was performed by filtration over Celite<sup>®</sup> Hyflo Supercel (Merck). After washing the Celite<sup>®</sup> with EtOH and H<sub>2</sub>O, the filtrate was diluted with DCM. The aqueous layer was extracted with DCM (3x) followed by washing the combined organic layers with H<sub>2</sub>O, sat. aq. NaHCO<sub>3</sub> and brine respectively. Subsequently, the organic layer was dried over MgSO<sub>4</sub>, filtered and concentrated *in vacuo* to yield the crude product as a colourless oil. Flash column chromatography (10:90 → 40:60; pentane: EtOAc) yielded the title compound (33 mg, 0.21 mmol, 87%) as a colourless oil. TLC: R<sub>f</sub> 0.3 (pentane:EtOAc, 8:2, v:v); IR (neat, cm<sup>-1</sup>): 810, 1080, 1120, 1320, 1803, 2879, 2928; <sup>1</sup>H NMR (500 MHz, CDCl<sub>3</sub>, HH-COSY, HSQC): δ 4.94 (p, *J* = 6.7 Hz, 1H, H-5), 4.41 (dd, *J* = 9.0, 7.2 Hz, 1H, H-4), 3.82 (tdd, *J* = 8.6, 5.3, 3.1 Hz, 1H, H-3), 1.87 (dq, *J* = 14.4, 7.6, 3.0 Hz, 1H, H-2), 1.66 (d, *J* = 5.5 Hz, 1H, 3-OH), 1.59 – 1.51 (m, 1H, H-2), 1.51 (d, *J* = 6.6 Hz, 3H, H-6), 1.05 (t, *J* = 7.5 Hz, 3H, H-1); <sup>13</sup>C NMR (126 MHz, CDCl<sub>3</sub>, HSQC): δ 154.3 (O(C=O)O), 80.0 (C-4), 76.4 (C-5), 69.9 (C-3), 27.4 (C-2), 15.0 (C-6), 8.9 (C-1); HRMS: [M+Na]<sup>+</sup> calcd for C<sub>7</sub>H<sub>12</sub>O<sub>4</sub>Na 183.0628, found 183.0623.

## Model glycosylation reactions

### Results of compound 4

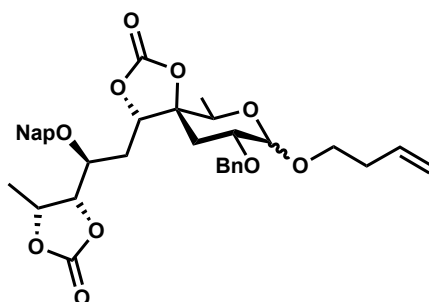

**3-Butene 2-O-benzyl-4,7,10,11-di-O-carbonate-9-O-(2-methylnaphthalene)-α-D-caryophylloside (S51).** The title compound was prepared according to general procedure III (30.6 mg, 48 μmol, 97%, α:β; 63:37). Flash column chromatography (80:20 → 60:40; pentane:EtOAc) yielded the title compound as a white foam. TLC: R<sub>f</sub> 0.6 (pentane:EtOAc, 6:4, v:v); IR (neat, cm<sup>-1</sup>): 1055, 1202, 1797; NMR data reported as a mixture of α- and β-anomers; <sup>1</sup>H NMR (500 MHz, CDCl<sub>3</sub>, HH-COSY, HSQC, HMBC): <sup>1</sup>H NMR (500 MHz, CDCl<sub>3</sub>, HH-COSY, HSQC): δ 7.89 – 7.27 (m, 19.2H, CH<sub>arom</sub>), 5.89 – 5.76 (m, 1.6H, H-15<sub>α</sub>, H-15<sub>β</sub>), 5.23 – 4.97 (m, 3.2H, H-16<sub>α</sub>, H-16<sub>β</sub>), 4.92 – 4.86 (m, 1.6H, H-11<sub>α</sub>, H-11<sub>β</sub>), 4.79 – 4.75 (m, 4.2H, H-1<sub>α</sub>, CH<sub>2</sub> Bn/Nap<sub>α</sub>, CH<sub>2</sub> Bn/Nap<sub>β</sub>), 4.65 – 4.60 (m, 1.6H, H-10<sub>α</sub>, H-10<sub>β</sub>), 4.57 – 4.43 (m, 3.8H, CHH Bn/Nap<sub>α</sub>, CHH Bn/Nap<sub>β</sub>, CHH Bn/Nap<sub>α</sub>, CHH Bn/Nap<sub>β</sub>, H-7<sub>β</sub>), 4.36 – 4.30 (m, 1.6H, H-1<sub>β</sub>, H-7<sub>α</sub>), 4.05 – 3.88 (m, 3.2H, H-5<sub>α</sub>, H-9<sub>α</sub>, H-9<sub>β</sub>, H-13<sub>β</sub>), 3.77 – 3.51 (m, 4.8H, H-2<sub>α</sub>, H-2<sub>β</sub>, H-5<sub>β</sub>, H-13<sub>α</sub>, H-

13<sub>β</sub>), 2.45 – 2.32 (m, 3.2H, H-14<sub>α</sub>, H-14<sub>β</sub>), 2.16 (dd, *J* = 14.3, 5.1 Hz, 0.6H, H-3<sub>β</sub>), 2.11 – 2.02 (m, 3.2H, H-3<sub>α</sub>, H-8<sub>α</sub>, H-8<sub>β</sub>, H-8<sub>β</sub>), 1.92 (ddd, *J* = 14.9, 8.5, 2.0 Hz, 1H, H-8<sub>α</sub>), 1.83 (dd, *J* = 13.5, 4.8 Hz, 1H, H-3<sub>α</sub>), 1.74 (dd, *J* = 14.3, 10.2 Hz, 0.6H, H-3<sub>β</sub>), 1.47 – 1.41 (m, 4.8H, H-12<sub>α</sub>, H-12<sub>β</sub>), 1.33 (d, *J* = 6.3 Hz, 1.8H, H-6<sub>β</sub>), 1.22 (d, *J* = 6.3 Hz, 3H, H-6<sub>α</sub>); <sup>13</sup>C NMR (126 MHz, CDCl<sub>3</sub>, HSQC): δ 153.7, 153.6, 153.5, 153.3 (O(C=O)O), 138.1, 137.9 (C<sub>q</sub>-arom), 135.2 (C-15<sub>α</sub>), 135.0 (C-15<sub>β</sub>), 134.2, 134.1, 133.3, 133.3 (C<sub>q</sub>-arom), 132.4, 128.8, 128.8, 128.6, 128.6, 128.1, 128.1, 128.1, 127.9, 127.9, 127.9, 127.9, 127.0, 126.8, 126.7, 126.7, 126.6, 125.6, 125.5 (CH<sub>arom</sub>), 117.1 (C-16<sub>α</sub>), 116.9 (C-16<sub>β</sub>), 103.6 (C-1<sub>β</sub>), 95.6 (C-1<sub>α</sub>), 84.9 (C-4<sub>α</sub>), 84.0 (C-4<sub>β</sub>), 81.0 (C-7<sub>α</sub>), 80.2 (C-7<sub>β</sub>), 78.9 (C-10<sub>α</sub>), 78.7 (C-10<sub>β</sub>), 75.8 (C-11<sub>β</sub>), 75.8 (C-11<sub>α</sub>), 73.9 (C-9<sub>β</sub>), 73.8 (C-9<sub>α</sub>), 73.7, 73.5 (CH<sub>2</sub> Bn/Nap), 73.3 (C-2<sub>β</sub>), 73.2 (CH<sub>2</sub> Bn/Nap), 71.5 (C-2<sub>α</sub>), 68.7 (C-13<sub>β</sub>), 67.7 (C-13<sub>α</sub>), 64.9 (C-5<sub>α</sub>), 37.6 (C-3<sub>β</sub>), 34.2 (C-14<sub>β</sub>), 34.0 (C-14<sub>α</sub>), 33.7 (C-3<sub>α</sub>), 29.7 (C-8<sub>α</sub>), 29.4 (C-8<sub>β</sub>), 15.6 (C-6<sub>β</sub>), 15.3 (C-12<sub>α</sub>), 15.2 (C-12<sub>β</sub>), 14.9 (C-6<sub>α</sub>); HRMS: [M+Na]<sup>+</sup> calcd for C<sub>36</sub>H<sub>40</sub>O<sub>10</sub>Na 655.2519, found 655.2514.

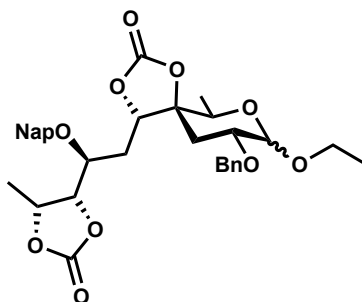

**Ethyl 2-O-benzyl-4,7,10,11-di-O-carbonate-9-O-(2-methylnaphthalene)-D-caryophylloside (S52).**

The title compound was prepared according to general procedure III (28.5 mg, 47 μmol, 94%, α:β; 67:33). Flash column chromatography (80:20 → 50:50; pentane:EtOAc) yielded the title compound as a colorless oil. TLC: R<sub>f</sub> 0.3 (pentane:EtOAc, 7:3, v:v); IR (neat, cm<sup>-1</sup>): 756, 1059, 1090, 1202, 1382, 1802, 2929; NMR data reported as a mixture of α- and β-anomers; <sup>1</sup>H NMR (500 MHz, CDCl<sub>3</sub>, HH-COSY, HSQC): δ 7.87 – 7.26 (m, 18H, CH<sub>arom</sub>), 4.95 – 4.86 (m, 1.5H, H-11<sub>α</sub>, H-11<sub>β</sub>), 4.79 – 4.76 (m, 4H, H-1<sub>α</sub>, CH<sub>2</sub> Bn/Nap<sub>α</sub>, CH<sub>2</sub> Bn/Nap<sub>β</sub>), 4.66 – 4.61 (m, 1.5H, H-10<sub>α</sub>, H-10<sub>β</sub>), 4.58 – 4.54 (m, 1.5H, CHH Bn/Nap<sub>α</sub>, CHH Bn/Nap<sub>β</sub>), 4.51 – 4.47 (m, 2H, CHH Bn/Nap<sub>α</sub>, CHH Bn/Nap<sub>β</sub>, H-7<sub>β</sub>), 4.37 – 4.31 (m, 1.5H, H-1<sub>β</sub>, H-7<sub>α</sub>), 4.05 – 3.97 (m, 1.5H, H-9<sub>α</sub>, H-9<sub>β</sub>), 3.94 (dd, *J* = 9.5, 7.1 Hz, 1H, CH<sub>2</sub>CH<sub>3β</sub>), 3.89 (q, *J* = 6.4 Hz, 1H, H-5<sub>α</sub>), 3.78 – 3.69 (m, 2.5H, H-2<sub>α</sub>, H-5<sub>β</sub>, CH<sub>2</sub>CH<sub>3α</sub>), 3.60 – 3.50 (m, 2H, H-2<sub>β</sub>, CH<sub>2</sub>CH<sub>3α</sub>, CH<sub>2</sub>CH<sub>3β</sub>), 2.20 – 2.04 (m, 3H, H-3<sub>α</sub>, H-3<sub>β</sub>, H-8<sub>α</sub>, H-8<sub>β</sub>), 1.95 (ddd, *J* = 14.9, 8.6, 2.1 Hz, 1H, H-8<sub>α</sub>), 1.84 (dd, *J* = 13.5, 4.8 Hz, 1H, H-3<sub>α</sub>), 1.75 (dd, *J* = 14.3, 10.1 Hz, 0.5H, H-3<sub>β</sub>), 1.47 – 1.42 (m, 4.5H, H-12<sub>α</sub>, H-12<sub>β</sub>), 1.34 (d, *J* = 6.3 Hz, 1.5H, H-6<sub>β</sub>), 1.26 (m, 1.28 – 1.24, 4.5H, CH<sub>2</sub>CH<sub>3α</sub>, CH<sub>2</sub>CH<sub>3β</sub>), 1.23 (d, *J* = 6.3 Hz, 3H, H-6<sub>α</sub>); <sup>13</sup>C NMR (126 MHz, CDCl<sub>3</sub>, HSQC): δ 153.7, 153.7, 153.5, 153.3 (O(C=O)O), 138.2, 137.9, 134.2, 134.1, 133.3 (C<sub>q</sub>-arom), 128.8, 128.8, 128.7, 128.6, 128.6, 128.2, 128.1, 128.1, 128.1, 128.0, 127.9, 127.9, 127.9, 127.0, 126.8, 126.7, 126.7, 126.7, 126.6, 126.6, 125.6, 125.4 (CH<sub>arom</sub>), 103.3 (C-1<sub>β</sub>), 95.3 (C-1<sub>α</sub>), 84.9 (C-4<sub>α</sub>), 84.0 (C-4<sub>β</sub>), 80.9 (C-7<sub>α</sub>), 80.3 (C-7<sub>β</sub>), 79.0 (C-10<sub>α</sub>), 78.8 (C-10<sub>β</sub>), 75.8 (C-11<sub>α</sub>), 75.8 (C-11<sub>β</sub>), 73.9 (C-9<sub>β</sub>), 73.8 (C-9<sub>α</sub>), 73.7 (CH<sub>2</sub> Bn/Nap<sub>α</sub>), 73.5 (CH<sub>2</sub> Bn/Nap<sub>β</sub>), 73.4 (C-2<sub>β</sub>), 73.2 (CH<sub>2</sub> Bn/Nap<sub>β</sub>), 71.5 (CH<sub>2</sub> Bn/Nap<sub>α</sub>), 71.4 (C-5<sub>β</sub>), 71.4 (C-2<sub>α</sub>), 65.0 (CH<sub>2</sub>CH<sub>3β</sub>), 64.7 (C-5<sub>α</sub>), 63.9 (CH<sub>2</sub>CH<sub>3α</sub>), 37.5 (C-3<sub>β</sub>), 33.7 (C-3<sub>α</sub>), 29.7 (C-8<sub>α</sub>), 29.5 (C-8<sub>β</sub>), 15.6 (C-6<sub>β</sub>), 15.3 (C-12<sub>β</sub>), 15.3 (C-12<sub>α</sub>), 15.2 (CH<sub>2</sub>CH<sub>3α</sub>, CH<sub>2</sub>CH<sub>3β</sub>), 15.0 (C-6<sub>α</sub>); HRMS: [M+Na]<sup>+</sup> calcd for C<sub>34</sub>H<sub>36</sub>O<sub>10</sub>Na 629.2363, found 629.2357.

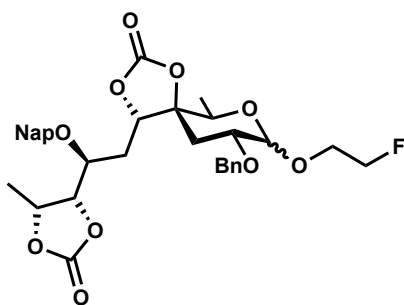

**2-Fluoroethyl 2-O-benzyl-4,7,10,11-di-O-carbonate-9-O-(2-methylnaphthalene)-D-caryophylloside (S53).** The title compound was prepared according to general procedure III (31 mg, 50  $\mu\text{mol}$ , *quant.*,  $\alpha:\beta$ ; 83:17). Flash column chromatography (60:40  $\rightarrow$  40:60; pentane:EtOAc) yielded the title compound as a colorless oil. TLC:  $R_f$  0.4 (pentane:EtOAc, 1:1, v:v); IR (neat,  $\text{cm}^{-1}$ ): 700, 753, 819, 1070, 1202, 1455, 1802; NMR data reported as a mixture of  $\alpha$ - and  $\beta$ -anomers;  $^1\text{H}$  NMR (500 MHz,  $\text{CDCl}_3$ , HH-COSY, HSQC):  $\delta$  7.89 – 7.27 (m, 14.4H,  $\text{CH}_{\text{arom}}$ ), 4.99 – 4.85 (m, 1.2H, H-11 $_{\alpha}$ , H-11 $_{\beta}$ ), 4.81 (d,  $J = 3.2$  Hz, 1H, H-1 $_{\alpha}$ ), 4.78 (s, 2H,  $\text{CH}_2$  Bn/Nap $_{\alpha}$ ), 4.74 – 4.46 (m, 6.6H, H-7 $_{\beta}$ , H-10 $_{\alpha}$ , H-10 $_{\beta}$ ,  $\text{CH}_2\text{F}_{\alpha}$ ,  $\text{CH}_2\text{F}_{\beta}$ ,  $\text{CH}_2$  Bn/Nap $_{\alpha}$ ,  $\text{CH}_2$  Bn/Nap $_{\beta}$ ,  $\text{CH}_2$  Bn/Nap $_{\beta}$ ), 4.42 (d,  $J = 6.6$  Hz, 0.2H, H-1 $_{\beta}$ ), 4.32 (d,  $J = 11.0$  Hz, 1H, H-7 $_{\alpha}$ ), 4.08 (dd,  $J = 12.5, 4.1$  Hz, 0.2H, H-9 $_{\beta}$ ), 4.06 – 3.95 (m, 2H, H-5 $_{\alpha}$ , H-9 $_{\alpha}$ ), 3.95 – 3.66 (m, 3.6H, H-2 $_{\alpha}$ , H-5 $_{\beta}$ ,  $\text{CH}_2\text{CH}_2\text{F}_{\alpha}$ ,  $\text{CH}_2\text{CH}_2\text{F}_{\beta}$ ), 3.61 (dt,  $J = 10.8, 5.8$  Hz, 0.2H, H-2 $_{\beta}$ ), 2.22 – 2.15 (m, 0.4H, H-3 $_{\beta}$ , H-8 $_{\beta}$ ), 2.14 – 2.04 (m, 2.2H, H-3 $_{\alpha}$ , H-8 $_{\alpha}$ , H-8 $_{\beta}$ ), 1.95 (dd,  $J = 14.8, 8.2$  Hz, 1H, H-8 $_{\alpha}$ ), 1.84 (dd,  $J = 13.6, 4.9$  Hz, 1H, H-3 $_{\alpha}$ ), 1.76 (dd,  $J = 14.4, 10.1$  Hz, 0.2H, H-3 $_{\beta}$ ), 1.46 (d,  $J = 6.7$  Hz, 3H, H-12 $_{\alpha}$ ), 1.44 (d,  $J = 6.7$  Hz, 0.6H, H-12 $_{\beta}$ ), 1.34 (d,  $J = 6.2$  Hz, 0.6H, H-6 $_{\beta}$ ), 1.23 (d,  $J = 6.3$  Hz, 3H, H-6 $_{\alpha}$ );  $^{13}\text{C}$  NMR (126 MHz,  $\text{CDCl}_3$ , HSQC):  $\delta$  153.7, 153.7, 153.5, 153.2 (O(C=O)O), 138.0, 137.8, 134.2, 134.1, 133.8, 133.3 ( $\text{C}_{\text{q-arom}}$ ), 128.8, 128.8, 128.7, 128.7, 128.6, 128.2, 128.2, 128.1, 128.1, 128.1, 128.0, 128.0, 128.0, 127.9, 127.2, 127.0, 126.8, 126.8, 126.7, 126.7, 126.6, 126.6, 125.7, 125.6, 125.5 ( $\text{CH}_{\text{arom}}$ ), 103.6 (C-1 $_{\beta}$ ), 95.6 (C-1 $_{\alpha}$ ), 84.9 (C-4 $_{\beta}$ ), 84.7 (C-4 $_{\alpha}$ ), 82.8 (d,  $J = 169.5$  Hz,  $\text{CH}_2\text{F}_{\alpha}$ ), 82.7 (d,  $J = 169.8$  Hz,  $\text{CH}_2\text{F}_{\beta}$ ), 80.9 (C-7 $_{\alpha}$ ), 80.3 (C-7 $_{\beta}$ ), 79.0 (C-10 $_{\alpha}$ ), 78.7 (C-10 $_{\beta}$ ), 75.9 (C-11 $_{\alpha}$ ), 75.8 (C-11 $_{\beta}$ ), 73.9 (C-9 $_{\alpha}$ ), 73.8 (C-9 $_{\beta}$ ), 73.7 ( $\text{CH}_2$  Bn/Nap $_{\alpha}$ ), 73.5, 73.3 ( $\text{CH}_2$  Bn/Nap $_{\beta}$ ), 73.2 (C-2 $_{\beta}$ ), 71.6 ( $\text{CH}_2$  Bn/Nap $_{\alpha}$ ), 71.4 (C-2 $_{\alpha}$ ), 68.3 (d,  $J = 19.8$  Hz,  $\text{CH}_2\text{CH}_2\text{F}_{\beta}$ ), 67.0 (d,  $J = 19.5$  Hz,  $\text{CH}_2\text{CH}_2\text{F}_{\alpha}$ ), 66.7 (C-5 $_{\beta}$ ), 64.8 (C-5 $_{\alpha}$ ), 37.4 (C-3 $_{\beta}$ ), 33.5 (C-3 $_{\alpha}$ ), 29.6 (C-8 $_{\beta}$ ), 29.5 (C-8 $_{\alpha}$ ), 15.6 (C-12 $_{\beta}$ ), 15.2 (C-12 $_{\alpha}$ ), 15.2 (C-6 $_{\alpha}$ ), 14.9 (C-12 $_{\beta}$ ); HRMS:  $[\text{M}+\text{Na}]^+$  calcd for  $\text{C}_{34}\text{H}_{37}\text{FO}_{10}\text{Na}$  647.2268, found 647.2263.

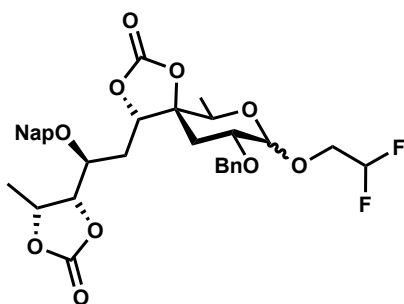

**2,2-Difluoroethyl 2-O-benzyl-4,7,10,11-di-O-carbonate-9-O-(2-methylnaphthalene)-D-caryophylloside (S54).** The title compound was prepared according to general procedure III (20.1 mg, 31  $\mu\text{mol}$ , 63%,  $\alpha:\beta$ ; 87:13). Flash column chromatography (80:20  $\rightarrow$  60:40; pentane:EtOAc) yielded the title compound as a colorless oil. TLC:  $R_f$  0.7 (pentane:EtOAc, 1:1, v:v); IR (neat,  $\text{cm}^{-1}$ ): 700, 754, 819, 1063, 1202, 1364, 1802; Data of the major stereoisomer ( $\alpha$ -anomer):  $^1\text{H}$  NMR (400 MHz,  $\text{CDCl}_3$ , HH-COSY, HSQC):  $\delta$  7.93 – 7.28 (m, 12H,  $\text{CH}_{\text{arom}}$ ), 5.95 (tt,  $J = 55.3, 4.2$  Hz, 1H,  $\text{CHF}_2$ ), 4.93 (h,  $J = 6.6$  Hz, 1H, H-11), 4.82 – 4.74 (m, 3H, H-1,  $\text{CH}_2$  Bn/Nap), 4.62 (t,  $J = 7.0$  Hz, 1H, H-10), 4.57 (d,  $J = 12.1$  Hz, 1H,  $\text{CHH}$  Bn/Nap), 4.48 (d,  $J = 12.0$  Hz, 1H,  $\text{CHH}$  Bn/Nap), 4.33 (dd,  $J = 11.1, 2.1$  Hz, 1H, H-7), 4.03 (ddd,  $J = 8.2, 6.5, 3.2$  Hz, 1H, H-9), 3.91 (q,  $J = 6.3$  Hz, 1H, H-5), 3.82 – 3.69 (m, 3H, H-2,  $\text{CH}_2\text{CHF}_2$ ), 2.15 – 2.01 (m, 2H, H-3, H-8), 1.93 (ddd,  $J = 14.7, 8.1, 2.1$  Hz, 1H, H-8), 1.85 (dd,  $J = 13.6, 4.9$  Hz, 1H, H-3), 1.46 (d,  $J = 6.6$  Hz, 3H, H-12), 1.24 (d,  $J = 6.3$  Hz, 3H, H-6);  $^{13}\text{C}$  NMR (126 MHz,  $\text{CDCl}_3$ , HSQC):  $\delta$  153.6, 153.3 (O(C=O)O), 137.7, 134.1, 133.3, 133.3 ( $\text{C}_{\text{q-arom}}$ ), 128.8, 128.7, 128.7, 128.3, 128.1, 128.0,



127.9, 127.9, 126.9, 126.7, 126.6, 125.5 (CH<sub>arom</sub>), 114.1 (t, *J* = 241.2 Hz, CHF<sub>2</sub>), 96.3 (C-1), 84.5 (C-4), 80.9 (C-7), 78.8 (C-10), 75.8 (C-11), 73.8 (C-9), 73.7, 71.8 (CH<sub>2</sub> Bn/Nap), 71.3 (C-2), 67.1 (t, *J* = 28.2 Hz, CH<sub>2</sub>CHF<sub>2</sub>), 65.3 (C-5), 33.4 (C-3), 29.5 (C-8), 15.2 (C-12), 14.9 (C-6); Diagnostic signals of the minor stereoisomer ( $\beta$ -anomer): <sup>1</sup>H NMR (400 MHz, CDCl<sub>3</sub>, HH-COSY, HSQC):  $\delta$  5.91 (tt, *J* = 55.4, 4.1 Hz, 1H, CHF<sub>2</sub>), 3.59 (q, *J* = 6.4 Hz, 1H, H-5), 1.41 (d, *J* = 6.6 Hz, 3H, H-12), 1.11 (d, *J* = 6.4 Hz, 3H, H-6); <sup>13</sup>C NMR (126 MHz, CDCl<sub>3</sub>, HSQC):  $\delta$  96.7 (C-1), 84.7 (C-4), 78.9 (C-10), 72.7 (C-9), 71.9, 71.9 (CH<sub>2</sub> Bn/Nap), 71.6 (C-2), 31.3 (C-3), 29.8 (C-8), 14.8 (C-12), 13.3 (C-6); HRMS: [M+Na]<sup>+</sup> calcd for C<sub>34</sub>H<sub>36</sub>F<sub>2</sub>O<sub>10</sub>Na 665.2174, found 665.2169.

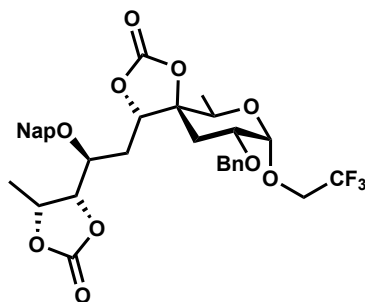

**2,2,2-Trifluoroethyl 2-O-benzyl-4,7,10,11-di-O-carbonate-9-O-(2-methylnaphthalene)- $\alpha$ -D-caryophylloside (S55).** The title compound was prepared according to general procedure III (25 mg, 38  $\mu$ mol, 76%,  $\alpha$ : $\beta$ ; >98:2). Flash column chromatography (90:10  $\rightarrow$  70:30; pentane:EtOAc) yielded the title compound as a colorless oil. TLC: R<sub>f</sub> 0.8 (pentane:EtOAc, 1:1, v:v); [ $\alpha$ ]<sub>D</sub><sup>20</sup> 21.0° (c 1.0, CHCl<sub>3</sub>); IR (neat, cm<sup>-1</sup>): 701, 753, 819, 1067, 1155, 1279, 1804; <sup>1</sup>H NMR (400 MHz, CDCl<sub>3</sub>, HH-COSY, HSQC):  $\delta$  7.91 – 7.27 (m, 12H, CH<sub>arom</sub>), 4.91 (p, *J* = 6.8 Hz, 1H, H-11), 4.83 (d, *J* = 3.3 Hz, 1H, H-1), 4.78 (d, *J* = 2.5 Hz, 2H, CH<sub>2</sub> Bn/Nap), 4.62 (dd, *J* = 7.3, 6.5 Hz, 1H, H-10), 4.55 (d, *J* = 11.8 Hz, 1H, CHH Bn/Nap), 4.49 (d, *J* = 11.8 Hz, 1H, CHH Bn/Nap), 4.32 (dd, *J* = 11.2, 2.1 Hz, 1H, H-7), 4.03 (ddd, *J* = 8.5, 6.5, 3.1 Hz, 1H, H-9), 3.99 – 3.85 (m, 3H, H-5, CH<sub>2</sub>CF<sub>3</sub>), 3.78 (ddd, *J* = 11.7, 4.9, 3.3 Hz, 1H, H-2), 2.14 – 2.00 (m, 2H, H-3, H-8), 1.92 (ddd, *J* = 14.9, 8.5, 2.1 Hz, 1H, H-8), 1.85 (dd, *J* = 13.7, 4.9 Hz, 1H, H-3), 1.46 (d, *J* = 6.7 Hz, 3H, H-12), 1.24 (d, *J* = 6.4 Hz, 3H, H-6); <sup>13</sup>C NMR (101 MHz, CDCl<sub>3</sub>, HSQC):  $\delta$  153.6, 153.3 (O(C=O)O), 137.6, 134.2, 133.3, 133.3 (C<sub>q-arom</sub>), 128.9, 128.7, 128.7, 128.2, 128.1, 128.0, 127.9, 126.8, 126.8, 126.6, 125.5 (CH<sub>arom</sub>), 123.8 (d, *J* = 278.7 Hz, CF<sub>3</sub>), 96.4 (C-1), 84.3 (C-4), 81.0 (C-7), 79.0 (C-10), 75.8 (C-11), 73.9 (C-9), 73.8, 71.7 (CH<sub>2</sub> Bn/Nap), 71.1 (C-2), 65.7 (C-5), 65.1 (d, *J* = 35.0 Hz, CH<sub>2</sub>CF<sub>3</sub>), 33.3 (C-3), 29.7 (C-8), 15.3 (C-12), 14.9 (C-6); HRMS: [M+Na]<sup>+</sup> calcd for C<sub>34</sub>H<sub>35</sub>F<sub>3</sub>O<sub>10</sub>Na 683.2080, found 683.2075.

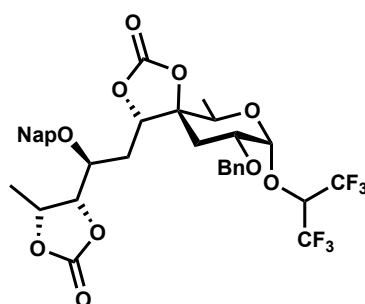

**1,1,1,3,3,3-Hexafluoropropyl 2-O-benzyl-4,7,10,11-di-O-carbonate-9-O-(2-methylnaphthalene)- $\alpha$ -D-caryophylloside (S56).** The title compound was prepared according to general procedure III (5.2 mg, 7.2  $\mu$ mol, 16%,  $\alpha$ : $\beta$ ; >98:2). Flash column chromatography (90:10  $\rightarrow$  70:30; pentane:EtOAc) yielded the title compound as a colorless oil. TLC: R<sub>f</sub> 0.8 (pentane:EtOAc, 1:1, v:v); IR (neat, cm<sup>-1</sup>): 700, 754, 819, 1066, 1204, 1311, 1803; <sup>1</sup>H NMR (500 MHz, CDCl<sub>3</sub>, HH-COSY, HSQC):  $\delta$  7.89 – 7.27 (m, 12H, CH<sub>arom</sub>), 5.10 (d, *J* = 3.4 Hz, 1H, H-1), 4.92 (p, *J* = 6.8 Hz, 1H, H-11), 4.81 (d, *J* = 11.6 Hz, 1H, CHH Bn/Nap), 4.75 (d, *J* = 11.6 Hz, 1H, CHH Bn/Nap), 4.59 (t, *J* = 7.0 Hz, 1H, H-10), 4.55 (d, *J* = 11.5 Hz, 1H, CHH Bn/Nap), 4.52 – 4.43 (m, 2H, CHH Bn/Nap, CH(CF<sub>3</sub>)<sub>2</sub>), 4.31 (dd, *J* = 11.5, 2.0 Hz, 1H, H-7), 4.04 (ddd, *J* = 9.3, 6.7, 3.1 Hz, 1H, H-9), 3.99 (q, *J* = 6.2 Hz, 1H, H-5), 3.82 (ddd, *J* = 11.4, 4.7, 3.6 Hz, 1H, H-2), 2.07 – 1.99 (m, 2H, H-3, H-8), 1.92 – 1.87 (m, 1H, H-8), 1.84 (dd, *J* = 13.8, 4.7 Hz, 1H, H-3), 1.47 (d, *J*

= 6.7 Hz, 3H, H-12), 1.25 – 1.23 (m, 3H, H-6);  $^{13}\text{C}$  NMR (126 MHz,  $\text{CDCl}_3$ , HSQC):  $\delta$  137.3, 134.2, 133.3, 133.3 ( $\text{C}_{\text{q- arom}}$ ), 128.9, 128.7, 128.3, 128.1, 127.9, 127.8, 126.9, 126.8, 126.7, 125.5 ( $\text{CH}_{\text{arom}}$ ), 97.9 (C-1), 84.0 (C-4), 81.2 (C-7), 79.0 (C-10), 75.8 (C-11), 74.0 (C-9), 74.0, 71.8 ( $\text{CH}_2$  Bn/Nap), 70.5 (C-2), 66.7 (C-5), 33.3 (C-3), 29.8 (C-8), 15.3 (C-12), 14.8 (C-6); HRMS:  $[\text{M}+\text{Na}]^+$  calcd for  $\text{C}_{35}\text{H}_{34}\text{F}_6\text{O}_{10}\text{Na}$  751.1954, found 751.1948.

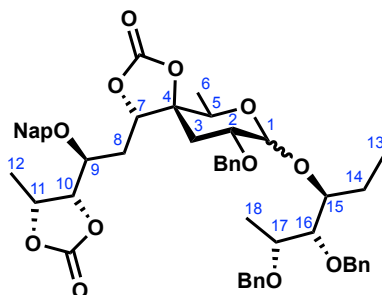

**1,2,6-Trideoxy-4,5-di-O-benzyl-D-altritol-2-O-benzyl-4,7,10,11-di-O-carbonyl-9-O-(2-**

**methylnaphthalene)- $\alpha$ -D-caryophylloside (S57).** The title compound was prepared according to the general procedure III giving the product as a white solid (11.5 mg, 50%,  $\alpha$ : $\beta$ ; 77:23) TLC:  $R_f$  0.8 (pentane:EtOAc, 3:2, v:v); Data of the major stereoisomer ( $\alpha$ -anomer):  $^1\text{H}$  NMR (600 MHz,  $\text{CDCl}_3$ , HH-COSY, HSQC):  $\delta$  7.87 – 7.14 (m, 22H,  $\text{CH}_{\text{arom}}$ ), 4.98 (d,  $J$  = 3.2 Hz, 1H, H-1), 4.79 (m, 1H, H-11), 4.76 – 4.64 (m, 2H,  $\text{CH}_2$  Bn/Nap), 4.56 – 4.48 (m, 2H,  $\text{CH}_2$  Bn/Nap), 4.37 (t,  $J$  = 6.8 Hz, H-10), 4.27 (dd,  $J$  = 11.6, 1.6 Hz, 1H, H-7), 4.22 (q,  $J$  = 6.8 Hz, 1H, H-17), 3.92 (m, 1H, H-9), 3.85 (m, 1H, H-15), 3.78 (m, 1H, H-2), 3.67 (m, 1H, H-16), 2.22 (m, 1H, H-8), 2.04 – 1.96 (m, 2H, H-3, H-8), 1.87 (dd,  $J$  = 13.6, 4.5 Hz, 1H, H-3), 1.82 (m, 1H, H-2), 1.43 (d,  $J$  = 6.4 Hz, 3H, H-12), 1.41 (d,  $J$  = 6.4 Hz, 3H, H-6), 1.07 (d,  $J$  = 6.4 Hz, 3H, H-18), 0.95 (t,  $J$  = 8.2 Hz, 1H, H-13);  $^{13}\text{C}$  NMR (101 MHz,  $\text{CDCl}_3$ , HSQC):  $\delta$  153.5, 153.4, 138.7, 137.8, 134.0, 133.2 ( $\text{C}_{\text{q- arom}}$ ), 128.7, 128.5, 128.4, 128.0, 128.0, 127.9, 127.8, 127.6, 127.6, 127.5, 127.5, 127.0, 126.5, 126.4, 125.6 ( $\text{CH}_{\text{arom}}$ ), 93.0 (C-1), 82.2 (C-16), 80.6 (C-7), 78.3 (C-10), 78.2, 75.7 ( $\text{CH}_2$  Bn/Nap), 75.6 (C-11), 75.0 (C-15), 73.5 (C-9), 71.4 (C-2), 70.8 ( $\text{CH}_2$  Bn/Nap), 64.8 (C-5), 33.7 (C-3), 29.7 (C-8), 22.7 (C-14), 16.3 (C-6), 15.0 (C-12), 14.9 (C-18), 10.0 (C-13); Diagnostic signals of the minor stereoisomer ( $\beta$ -anomer):  $^1\text{H}$  NMR (600 MHz,  $\text{CDCl}_3$ , HH-COSY, HSQC):  $\delta$  4.45 (d,  $J$  = 7.0 Hz, 1H, H-1);  $^{13}\text{C}$  NMR (126 MHz,  $\text{CDCl}_3$ , HSQC):  $\delta$  102.3 (C-1); HRMS:  $[\text{M}+\text{Na}]^+$  calcd for  $\text{C}_{52}\text{H}_{58}\text{O}_{12}\text{N}_a$  897.3826, found 897.3816.

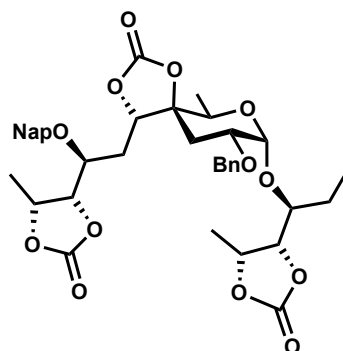

**1,2,6-Trideoxy-4,5-di-O-carbonyl-D-altritol-2-O-benzyl-4,7,10,11-di-O-carbonyl-9-O-(2-**

**methylnaphthalene)- $\alpha$ -D-caryophylloside (S58).** The title compound was prepared according to the general procedure III giving the product as a white solid (12.0 mg, 54%,  $\alpha$ : $\beta$ ; >98:2). TLC:  $R_f$  0.4 (pentane:EtOAc, 3:2, v:v);  $^1\text{H}$  NMR (600 MHz,  $\text{CDCl}_3$ , HH-COSY, HSQC):  $\delta$  7.88 – 7.89 (m, 4H,  $\text{CH}_{\text{arom}}$ ), 7.39 (m, 2H,  $\text{CH}_{\text{arom}}$ ), 7.44 (m, 2H,  $\text{CH}_{\text{arom}}$ ), 7.37 – 7.30 (m, 4H,  $\text{CH}_{\text{arom}}$ ), 5.01 – 4.95 (m, 3H, H-1, H-5, H-11), 4.90 (d,  $J$  = 11.9 Hz, 1H,  $\text{CHH}$  Bn/Nap), 4.79 (d,  $J$  = 11.9 Hz, 1H,  $\text{CHH}$  Bn/Nap), 4.71 (m, 2H, H-10, H-16), 4.52 (d,  $J$  = 11.9 Hz, 1H,  $\text{CHH}$  Bn/Nap), 4.35 (dd,  $J$  = 11.8, 1.42 Hz, 1H, H-7), 4.16 (m, 1H, H-9), 4.00 (m, 2H, H-17, H-15), 3.81 (m, 1H, H-2), 2.22 (m, 1H, H-8), 2.04 -1.96 (m, 2H, H-3, H-8), 1.87 (dd,  $J$  = 13.6, 4.5 Hz, 1H, H-3), 1.82 (m, 1H, H-14), 1.66 (d,  $J$  = 6.3 Hz, H-6), 1.60 (m, 3H, H-14), 1.56 (d,  $J$  = 7.1 Hz, 1H, H-12), 1.27 (d,  $J$  = 7.1 Hz, 1H, H-18), 1.02 (t,  $J$  = 8.2 Hz, 1H, H-13);  $^{13}\text{C}$  NMR (151

MHz, CDCl<sub>3</sub>, HSQC):  $\delta$  155.8, 155.0, 154.4, 138.7, 135.6, 134.2, 134.1(C<sub>q-*arom*</sub>), 129.5, 129.5, 129.0, 128.9, 128.7, 128.5, 127.8, 127.4, 127.3, 126.6 (CH<sub>*arom*</sub>), 93.4 (C-1), 82.3 (C-7), 80.5 (C-16), 79.6 (C-10), 78.1 (C-15), 77.3 (C-11/C-17) 77.2 (C-17/C-11), 75.0 (C-9), 74.7, 72.3 (CH<sub>2</sub> Bn/Nap), 72.2 (C-2), 66.6 (C-5), 34.1 (C-3), 30.0 (C-8), 23.0 (C-14), 16.4 (C-12), 16.3 (C-6), 15.9 (C-18), 11.5 (C-13); HRMS: [M+Na]<sup>+</sup> calcd for C<sub>39</sub>H<sub>44</sub>O<sub>13</sub>Na 743.2680, found 743.2672.

### Results of compound 23

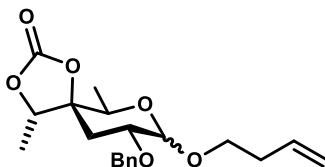

**But-3-ylenyl 2-O-benzyl-4,7-carbonate-D-yersinioside (S59).** The title compound was prepared according to general procedure III (15.6 mg, 43  $\mu$ mol, 86%,  $\alpha$ : $\beta$ ; 59:41) as a colorless oil. The title compound was also prepared according to general procedure IV (10 mg, 27  $\mu$ mol, 55%,  $\alpha$ : $\beta$ ; 67:33). The title compound was also prepared according to general procedure V (11 mg, 30  $\mu$ mol, 61%,  $\alpha$ : $\beta$ ; >98:2). TLC: R<sub>f</sub> 0.4 (pentane:EtOAc, 8:2, v:v); [ $\alpha$ ]<sub>D</sub><sup>20</sup> 28.3° (c 0.5, CHCl<sub>3</sub>;  $\alpha$ -anomer); IR (neat, cm<sup>-1</sup>): 746, 1008, 1066, 1089, 1808, 2925; Data of the  $\alpha$ -anomer: <sup>1</sup>H NMR (400 MHz, CDCl<sub>3</sub>):  $\delta$  7.39 – 7.28 (m, 5H, CH<sub>*arom*</sub>), 5.83 (ddt, *J* = 17.1, 10.2, 6.8 Hz, 1H, H-11), 5.13 (dq, *J* = 17.2, 1.7 Hz, 1H, H-12), 5.06 (ddt, *J* = 10.2, 2.1, 1.2 Hz, 1H, H-12), 4.78 (d, *J* = 3.3 Hz, 1H, H-1), 4.61 (d, *J* = 12.1 Hz, 1H, CHH Bn), 4.56 (d, *J* = 12.0 Hz, 1H, CHH Bn), 4.33 (q, *J* = 6.9 Hz, 1H, H-5), 3.95 (q, *J* = 6.3 Hz, 1H, H-7), 3.81 (ddd, *J* = 11.8, 5.0, 3.3 Hz, 1H, H-2), 3.73 – 3.51 (m, 2H, H-9), 2.55 – 2.28 (m, 2H, H-10), 2.11 (dd, *J* = 13.5, 11.8 Hz, 1H, H-3), 1.97 (dd, *J* = 13.5, 4.9 Hz, 1H, H-3), 1.43 (d, *J* = 6.9 Hz, 3H, H-6), 1.25 (d, *J* = 6.3 Hz, 3H, H-8); <sup>13</sup>C NMR (101 MHz, CDCl<sub>3</sub>):  $\delta$  154.2 (O(C=O)O), 138.0 (C<sub>q-*arom*</sub>), 135.2 (C-11), 129.5, 128.7, 128.1, 127.9 (CH<sub>*arom*</sub>), 117.0 (C-12), 95.6 (C-1), 84.9 (C-4), 81.5 (C-5), 71.8 (CH<sub>2</sub> Bn), 71.7 (C-2), 67.6 (C-9), 65.0 (C-7), 34.1 (C-10), 33.7 (C-3), 14.7 (C-8), 13.1 (C-6); Diagnostic signals of the  $\beta$ -anomer: <sup>1</sup>H NMR (500 MHz, CDCl<sub>3</sub>):  $\delta$  4.36 (d, *J* = 7.2 Hz, 1H, H-1); <sup>13</sup>C NMR (126 MHz):  $\delta$  104.1 (C-1), 73.8 (CH<sub>2</sub> Bn), 68.9 (C-9); HRMS: [M+Na]<sup>+</sup> calcd for C<sub>20</sub>H<sub>26</sub>O<sub>6</sub>Na 385.1627, found 385.1622.

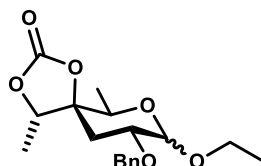

**Ethyl 2-O-benzyl-4,7-carbonate-D-yersinioside (S60).** The title compound was prepared according to general procedure III (10 mg, 30  $\mu$ mol, 60%,  $\alpha$ : $\beta$ ; 50:50) as a colorless oil. The title compound was also prepared according to general procedure IV (12 mg, 36  $\mu$ mol, 72%,  $\alpha$ : $\beta$ ; 63:37). The title compound was also prepared according to general procedure V (10 mg, 30  $\mu$ mol, 60%,  $\alpha$ : $\beta$ ; >98:2). TLC: R<sub>f</sub> 0.5 (pentane:EtOAc, 7:3, v:v); [ $\alpha$ ]<sub>D</sub><sup>20</sup> 69.8° (c 0.5, CHCl<sub>3</sub>;  $\alpha$ -anomer); IR (neat, cm<sup>-1</sup>): 1007, 1066, 1804, 2923; NMR data reported as a mixture of  $\alpha$ - and  $\beta$ -anomers; <sup>1</sup>H NMR (400 MHz, CDCl<sub>3</sub>):  $\delta$  7.38 – 7.28 (m, 10H, CH<sub>*arom*</sub>), 4.86 (d, *J* = 11.6 Hz, 1H, CHH Bn), 4.79 (d, *J* = 3.3 Hz, 1H, H-1 <sub>$\alpha$</sub> ), 4.65 – 4.59 (m, 2H, CHH Bn, CHH Bn), 4.56 (d, *J* = 12.1 Hz, 1H, CHH Bn), 4.47 – 4.30 (m, 3H, H-1 <sub>$\beta$</sub> , H-7 <sub>$\beta$</sub> , H-7 <sub>$\alpha$</sub> ), 4.02 – 3.90 (m, 2H, H-9 <sub>$\beta$</sub> , H-9 <sub>$\alpha$</sub> ), 3.81 (ddd, *J* = 11.8, 5.0, 3.4 Hz, 1H, H-2 <sub>$\alpha$</sub> ), 3.76 – 3.68 (m, 2H, H-5 <sub>$\beta$</sub> , H-5 <sub>$\alpha$</sub> ), 3.65 – 3.50 (m, 3H, H-2 <sub>$\beta$</sub> , H-9 <sub>$\beta$</sub> , H-9 <sub>$\alpha$</sub> ), 2.25 (dd, *J* = 14.2, 5.2 Hz, 1H, H-3 <sub>$\beta$</sub> ), 2.16 – 2.04 (m, 1H, H-3 <sub>$\alpha$</sub> ), 1.97 (dd, *J* = 13.5, 5.0 Hz, 1H, H-3 <sub>$\alpha$</sub> ), 1.76 (dd, *J* = 14.3, 10.8 Hz, 1H, H-3 <sub>$\beta$</sub> ), 1.48 – 1.42 (m, *J* = 6.9, 3.3 Hz, 6H, H-8 <sub>$\beta$</sub> , H-8 <sub>$\alpha$</sub> ), 1.36 (d, *J* = 6.3 Hz, 3H H-10 <sub>$\alpha$</sub> /H-10 <sub>$\beta$</sub> ), 1.27 – 1.24 (m, 9H, H-6 <sub>$\beta$</sub> , H-6 <sub>$\alpha$</sub> , H-10 <sub>$\beta$</sub> /H-10 <sub>$\alpha$</sub> ); <sup>13</sup>C NMR (101 MHz, CDCl<sub>3</sub>):  $\delta$  138.0, 137.9 (C<sub>q-*arom*</sub>), 131.2, 129.5, 128.7, 128.6, 128.1, 128.0, 128.0, 127.9, 124.9 (CH<sub>*arom*</sub>), 104.0 (C-1 <sub>$\beta$</sub> ), 95.3 (C-1 <sub>$\alpha$</sub> ), 85.0 (C-4 <sub>$\alpha$</sub> /C-4 <sub>$\beta$</sub> ), 84.2 (C-4 <sub>$\beta$</sub> /C-4 <sub>$\alpha$</sub> ), 81.5 (C-7 <sub>$\alpha$</sub> /C-7 <sub>$\beta$</sub> ), 80.6 (C-7 <sub>$\beta$</sub> /C-7 <sub>$\alpha$</sub> ), 73.4 (C-2 <sub>$\beta$</sub> ), 73.4 (CH<sub>2</sub> Bn), 71.9 (C-2 <sub>$\alpha$</sub> ), 71.7 (CH<sub>2</sub> Bn), 65.1 (C-9 <sub>$\beta$</sub> /C-9 <sub>$\alpha$</sub> ), 64.9 (C-5 <sub>$\beta$</sub> /C-5 <sub>$\alpha$</sub> ), 63.8 (C-9 <sub>$\alpha$</sub> /C-9 <sub>$\beta$</sub> ), 38.3 (C-3 <sub>$\beta$</sub> ), 33.8 (C-3 <sub>$\alpha$</sub> ), 15.4 (C-6 <sub>$\beta$</sub> /C-6 <sub>$\alpha$</sub> ), 15.4 (C-6 <sub>$\alpha$</sub> /C-6 <sub>$\beta$</sub> ), 15.2 (C-10 <sub>$\alpha$</sub> /C-10 <sub>$\beta$</sub> ), 14.8 (C-10 <sub>$\beta$</sub> /C-10 <sub>$\alpha$</sub> ), 13.2 (C-8 <sub>$\beta$</sub> /C-8 <sub>$\alpha$</sub> ), 13.2 (C-8 <sub>$\alpha$</sub> /C-8 <sub>$\beta$</sub> ); HRMS: [M+Na]<sup>+</sup> calcd for C<sub>18</sub>H<sub>24</sub>O<sub>6</sub>Na 359.1471, found 359.1465.

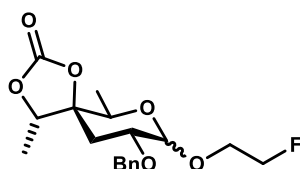

**2-Fluoroethyl 2-O-benzyl-4,7-carbonate-D-yersinoside (S61).** The title compound was prepared according to general procedure III (13 mg, 38  $\mu\text{mol}$ , 76%,  $\alpha:\beta$ ; 66:34) as a colorless oil. The title compound was also prepared according to general procedure IV (14 mg, 42  $\mu\text{mol}$ , 85%,  $\alpha:\beta$ ; 81:19). The title compound was also prepared according to general procedure V (11 mg, 33  $\mu\text{mol}$ , 65%,  $\alpha:\beta$ ; >98:2); TLC:  $R_f$  0.1 (pentane:EtOAc, 8:2, v:v);  $[\alpha]_D^{20}$  57.6° (c 0.5,  $\text{CHCl}_3$ ;  $\alpha$ -anomer); IR (neat,  $\text{cm}^{-1}$ ): 1008, 1066, 1793, 1805; Data of the anomer:  $^1\text{H NMR}$  (500 MHz,  $\text{CDCl}_3$ ):  $\delta$  7.45 – 7.19 (m, 5H,  $\text{CH}_{\text{arom}}$ ), 4.82 (d,  $J = 3.2$  Hz, 1H, H-1), 4.72 – 4.50 (m, 4H,  $\text{CH}_2\text{F}$ ,  $\text{CHH Bn}$ ,  $\text{CHH Bn}$ ), 4.34 (q,  $J = 6.9$  Hz, 1H, H-7), 4.01 (q,  $J = 6.4$  Hz, 1H, H-5), 3.96 – 3.68 (m, 3H, H-3,  $\text{CH}_2\text{CH}_2\text{F}$ ), 2.14 (dd,  $J = 13.5$ , 11.9 Hz, 1H, H-3), 1.99 (dd,  $J = 13.5$ , 4.9 Hz, 1H, H-3), 1.43 (d,  $J = 6.9$  Hz, 3H, H-8), 1.25 (d,  $J = 6.3$  Hz, 3H, H-6);  $^{13}\text{C NMR}$  (126 MHz,  $\text{CDCl}_3$ ):  $\delta$  154.1 (O(C=O)O), 137.9 ( $\text{C}_{\text{q-arom}}$ ), 128.7, 128.6, 128.2, 128.0, 128.0 ( $\text{CH}_{\text{arom}}$ ), 95.8 (C-1), 84.8 (C-4), 82.7 (d,  $J = 169.8$  Hz,  $\text{CH}_2\text{F}$ ), 81.6 (C-7), 72.0 (C-2), 71.8 (C-5), 71.7 ( $\text{CH}_2\text{ Bn}$ ), 67.1 (d,  $J = 19.7$  Hz,  $\text{CH}_2\text{CH}_2\text{F}$ ), 33.6 (C-3), 14.8 (C-6), 13.1 (C-8); Diagnostic signals of the  $\beta$ -isomer:  $^1\text{H NMR}$  (500 MHz,  $\text{CDCl}_3$ ):  $\delta$  4.86 (d,  $J = 11.5$  Hz, 1H,  $\text{CHH Bn}$ ), 4.46 – 4.39 (m, 2H, H-1, H-7), 3.65 (ddd,  $J = 11.1$ , 6.9, 5.3 Hz, 2H, H-2), 2.27 (dd,  $J = 14.3$ , 5.3 Hz, 1H, H-3), 1.78 (dd,  $J = 14.3$ , 10.7 Hz, 1H, H-3), 1.36 (d,  $J = 6.3$  Hz, 3H, H-6);  $^{13}\text{C NMR}$  (126 MHz):  $\delta$  153.8 (O(C=O)O), 138.2 ( $\text{C}_{\text{q-arom}}$ ), 104.2 (C-1), 84.1 (C-4), 82.84 (d,  $J = 169.8$  Hz,  $\text{CH}_2\text{F}$ ), 80.6 (C-7), 73.5 ( $\text{CH}_2\text{ Bn}$ ), 73.2 (C-2), 68.27 (d,  $J = 20.0$  Hz,  $\text{CH}_2\text{CH}_2\text{F}$ ), 65.0 (C-5), 38.1 (C-3), 15.3 (C-6), 13.2 (C-8); HRMS:  $[\text{M}+\text{Na}]^+$  calcd for  $\text{C}_{18}\text{H}_{23}\text{O}_6\text{Na}$  377.1376, found 377.1368.

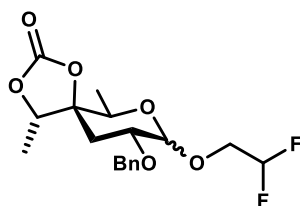

**2,2-Di-fluoroethyl 2-O-benzyl-4,7-carbonate-D-yersinoside (S62).** The title compound was prepared according to general procedure III (18 mg, 50  $\mu\text{mol}$ , *quant.*,  $\alpha:\beta$ ; 80:20) as a colorless oil. The title compound was also prepared according to general procedure IV (18 mg, 50  $\mu\text{mol}$ , *quant.*,  $\alpha:\beta$ ; 88:12). The title compound was also prepared according to general procedure V (3.0 mg, 8  $\mu\text{mol}$ , 16%,  $\alpha:\beta$ ; >98:2); TLC:  $R_f$  0.2 (pentane:EtOAc, 8:2, v:v); IR (neat,  $\text{cm}^{-1}$ ): 696, 1009, 1063, 1091, 1793, 1808; Data of the major stereoisomer ( $\alpha$ -anomer):  $^1\text{H NMR}$  (500 MHz,  $\text{CDCl}_3$ ):  $\delta$  8.10 – 7.16 (m, 15H,  $\text{CH}_{\text{arom}}$ ), 5.94 (tt,  $J = 55.4$ , 4.2 Hz, 1H,  $\text{CHF}_2$ ), 4.79 (d,  $J = 3.3$  Hz, 1H, H-1), 4.63 (d,  $J = 12.1$  Hz, 1H,  $\text{CHH Bn}$ ), 4.55 (d,  $J = 12.0$  Hz, 1H,  $\text{CHH Bn}$ ), 4.35 (q,  $J = 6.9$  Hz, 1H, H-7), 3.95 (q,  $J = 6.3$  Hz, 1H, H-5), 3.87 – 3.70 (m, 3H, H-2,  $\text{CH}_2\text{CHF}_2$ ), 2.09 (d,  $J = 11.8$  Hz, 1H, H-3), 2.00 (dd,  $J = 13.6$ , 5.0 Hz, 1H, H-3), 1.43 (d,  $J = 6.9$  Hz, 3H, H-8), 1.26 (d,  $J = 6.3$  Hz, 3H, H-6);  $^{13}\text{C NMR}$  (126 MHz,  $\text{CDCl}_3$ ):  $\delta$  154.0 (O(C=O)O), 137.8 ( $\text{C}_{\text{q-arom}}$ ), 131.2, 129.5, 128.7, 128.0, 124.9 ( $\text{CH}_{\text{arom}}$ ), 114.1 (t,  $J = 241.5$  Hz,  $\text{CHF}_2$ ), 96.4 (C-1), 84.5 (C-4), 81.5 (C-7), 71.9 ( $\text{CH}_2\text{ Bn}$ ), 71.6 (C-2), 67.2 (t,  $J = 28.5$  Hz,  $\text{CH}_2\text{CHF}_2$ ), 65.5 (C-5), 33.5 (C-3), 14.8 (C-6), 13.1 (C-8); Diagnostic signals of the minor stereoisomer ( $\beta$ -isomer):  $^1\text{H NMR}$  (500 MHz,  $\text{CDCl}_3$ ):  $\delta$  4.46 – 4.39 (m, 2H, H-1, H-7), 3.64 (ddd,  $J = 10.8$ , 7.1, 5.3 Hz, 1H), 2.26 (dd,  $J = 14.4$ , 5.3 Hz, 1H, H-3), 1.78 (dd,  $J = 14.3$ , 10.8 Hz, 1H, H-3), 1.36 (d,  $J = 6.2$  Hz, 1H, H-6);  $^{13}\text{C NMR}$  (126 MHz,  $\text{CDCl}_3$ ):  $\delta$  145.8 (O(C=O)O), 138.0 ( $\text{C}_{\text{q-arom}}$ ), 104.3 (C-1), 83.9 (C-4), 80.6 (C-7), 73.5 ( $\text{CH}_2\text{ Bn}$ ), 73.1 (C-2), 72.2 (C-5), 38.0 (C-3), 15.3 (C-6), 13.2 (C-8); HRMS:  $[\text{M}+\text{Na}]^+$  calcd for  $\text{C}_{18}\text{H}_{22}\text{O}_6\text{F}_2\text{Na}$  395.1282, found 395.1284.

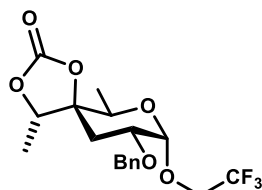

**2,2-Tri-fluoroethyl 2-O-benzyl-4,7-carbonate- $\alpha$ -D-yersinioside (S63).** The title compound was prepared according to general procedure III (15 mg, 38  $\mu$ mol, 77%,  $\alpha$ : $\beta$ ; >98:2) as a colorless oil. The title compound was also prepared according to general procedure IV (7.0 mg, 18  $\mu$ mol, 36%,  $\alpha$ : $\beta$ ; >98:2). TLC:  $R_f$  0.8 (pentane:EtOAc, 7:3, v:v);  $[\alpha]_D^{20}$  25.7° (c 0.5, CHCl<sub>3</sub>); IR (neat, cm<sup>-1</sup>): 1009, 1063, 1275, 1793, 1809, 2925; <sup>1</sup>H NMR (400 MHz, CDCl<sub>3</sub>):  $\delta$  7.38 – 7.28 (m, 5H, CH<sub>arom</sub>), 4.83 (d,  $J$  = 3.3 Hz, 1H, H-1), 4.63 (d,  $J$  = 11.9 Hz, 1H, CHH Bn), 4.56 (d,  $J$  = 11.9 Hz, 1H, CHH Bn), 4.36 (q,  $J$  = 6.9 Hz, 1H, H-7), 3.98 – 3.80 (m, 4H, H-2, H-5, CH<sub>2</sub>CF<sub>3</sub>), 2.13 (dd,  $J$  = 13.6, 11.8 Hz, 1H, H-3), 2.02 (ddd,  $J$  = 13.6, 5.1, 0.8 Hz, 1H, H-3), 1.44 (d,  $J$  = 5.2 Hz, 3H, H-8), 1.27 (d,  $J$  = 6.4 Hz, 3H, H-6); <sup>13</sup>C NMR (101 MHz, CDCl<sub>3</sub>):  $\delta$  153.9 (O(C=O)O), 137.8 (C<sub>q-arom</sub>), 131.2, 129.5, 128.7, 128.3, 128.0, 125.7, 124.9 (CH<sub>arom</sub>), 96.4 (C-1), 84.4 (C-4), 81.5 (C-7), 71.9 (CH<sub>2</sub> Bn), 71.4 (C-2), 65.8 (C-5), 65.3, 65.0 (C-9), 33.4 (C-3), 14.7 (C-6), 13.1 (C-8); HRMS: [M+Na]<sup>+</sup> calcd for C<sub>18</sub>H<sub>21</sub>F<sub>3</sub>O<sub>6</sub>Na 413.1188, found 413.1182.

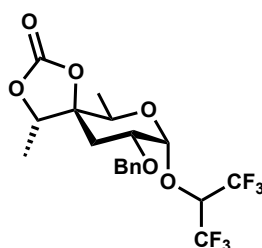

**1,1,1,3,3,3-hexafluoropropyl 2-O-benzyl-4,7-carbonate- $\alpha$ -D-yersinioside (S64).** The title compound was prepared according to general procedure III yielding the title compound (6.5 mg, 14  $\mu$ mol, 28%,  $\alpha$ : $\beta$ ; >98:2). Flash column chromatography (80:20 → 60:40; pentane:Et<sub>2</sub>O) yielded the title compound as a colourless oil. TLC:  $R_f$  0.8 (pentane:EtOAc, 8:2, v:v);  $[\alpha]_D^{20}$  42.5° (c 0.5, CHCl<sub>3</sub>); IR (neat, cm<sup>-1</sup>): 1008, 1064, 1105, 1197, 1796, 1813, 2923; <sup>1</sup>H NMR (400 MHz, CDCl<sub>3</sub>, HH-COSY, HSQC):  $\delta$  7.39 – 7.29 (m, 5H, CH<sub>arom</sub>), 5.15 (d,  $J$  = 3.4 Hz, 1H, H-1), 4.63 (d,  $J$  = 11.5 Hz, 1H, CHH Bn), 4.54 (d,  $J$  = 11.5 Hz, 1H, CHH Bn), 4.53 – 4.45 (m, 1H, H-9), 4.39 (q,  $J$  = 6.9 Hz, 1H, H-7), 4.04 (q,  $J$  = 6.3 Hz, 1H, H-5), 3.90 (ddd,  $J$  = 11.6, 5.2, 3.4 Hz, 1H, H-2), 2.14 (dd,  $J$  = 13.7, 11.6 Hz, 1H, H-3), 2.06 (dd,  $J$  = 13.7, 4.7 Hz, 1H, H-3), 1.43 (d,  $J$  = 2.9 Hz, 3H, H-8), 1.28 (d,  $J$  = 6.3 Hz, 3H, H-6); <sup>13</sup>C NMR (101 MHz, CDCl<sub>3</sub>, HSQC):  $\delta$  137.3 (C<sub>q-arom</sub>), 128.7, 128.3, 127.8 (CH<sub>arom</sub>), 97.9 (C-1), 84.1 (C-4), 81.6 (C-7), 73.4, 73.1 (C-9), 71.7 (CH<sub>2</sub> Bn), 70.7 (C-2), 66.8 (C-5), 33.2 (C-3), 14.7 (C-6), 13.0 (C-8); HRMS: [M+Na]<sup>+</sup> calcd for C<sub>19</sub>H<sub>20</sub>F<sub>6</sub>O<sub>6</sub>Na 481.1062, found 481.1056.

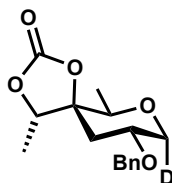

**2-O-benzyl-4,7-carbonate-1- $\alpha$ -deuterio-D-yersinioside (S65).** The title compound was prepared according to general procedure III yielding the title compound (7.9 mg, 27  $\mu$ mol, 54%,  $\alpha$ : $\beta$ ; >98:2). Flash column chromatography (80:20 → 60:40; pentane:Et<sub>2</sub>O) yielded the title compound as a colorless oil. TLC:  $R_f$  0.5 (pentane:EtOAc, 8:2, v:v);  $[\alpha]_D^{20}$  12.5° (c 0.5, CHCl<sub>3</sub>); IR (neat, cm<sup>-1</sup>): 1008, 1065, 1093, 1793, 2923; <sup>1</sup>H NMR (400 MHz, CDCl<sub>3</sub>, HH-COSY, HSQC):  $\delta$  7.38 – 7.29 (m, 5H, CH<sub>arom</sub>), 4.56 (s, 2H, CH<sub>2</sub> Bn), 4.49 (q,  $J$  = 6.8 Hz, 1H, H-7), 4.00 (dd,  $J$  = 4.5, 1.8 Hz, 1H, H-1), 3.81 (dt,  $J$  = 9.2, 4.5 Hz, 1H, H-2), 3.64 (q,  $J$  = 6.3 Hz, 1H, H-5), 2.31 (ddd,  $J$  = 13.8, 4.6, 1.9 Hz, 1H, H-3), 1.76 (dd,  $J$  = 13.7, 9.5 Hz, 1H, H-3), 1.47 (d,  $J$  = 6.8 Hz, 3H, H-8), 1.31 (d,  $J$  = 6.3 Hz, 3H, H-6); <sup>13</sup>C NMR (101 MHz, CDCl<sub>3</sub>, HSQC):  $\delta$  154.0 (O(C=O)O), 137.9 (C<sub>q-arom</sub>), 128.7, 128.2, 127.8 (CH<sub>arom</sub>), 83.8 (C-4), 81.8 (C-7), 73.4 (C-5), 71.5

(CH<sub>2</sub> Bn), 70.5 (C-2), 67.8, 67.6, 67.4 (C-1), 38.3 (C-3), 14.9 (C-6), 13.4 (C-8); HRMS: [M+Na]<sup>+</sup> calcd for C<sub>16</sub>H<sub>19</sub>DO<sub>5</sub>Na 316.1271, found 316.1266.

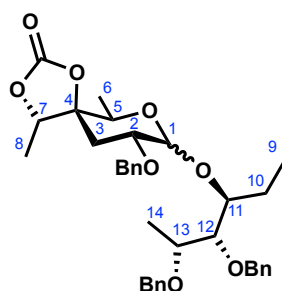

**1,2,6-Trideoxy-4,5-di-O-benzyl-D-altritol-2-O-benzyl-4,7-carbonyl-D-yersinioside (S66).** The title compound was prepared according to the general procedure III giving the product as a white solid (10.4 mg, 63%,  $\alpha$ : $\beta$ ; 61:39). TLC: R<sub>f</sub> 0.5 (pentane:EtOAc, 4:1, v:v) for  $\alpha$ -isomer. TLC: R<sub>f</sub> 0.2 (pentane:EtOAc, 4:1, v:v) for  $\beta$ -isomer; NMR data reported as a mixture of  $\alpha$ - and  $\beta$ -anomers; <sup>1</sup>H NMR (850 MHz, CDCl<sub>3</sub>, HH-COSY, HSQC):  $\delta$  7.41 – 7.17 (m, 15H, CH<sub>arom</sub>), 4.95 (d,  $J$  = 3.3 Hz, 1H, H-1 $_{\alpha}$ ), 4.76 (m, 2H, CHH Bn $_{\alpha}$ , CHH Bn $_{\beta}$ ), 4.71 (d,  $J$  = 11.8 Hz, 1H, CHH Bn $_{\beta}$ ), 4.67 – 4.49 (m, 7H, CHH Bn $_{\alpha}$ , CHH Bn $_{\alpha}$ , CHH Bn $_{\beta}$ , CHH Bn $_{\alpha}$ , CHH Bn $_{\alpha}$ , CHH Bn $_{\alpha}$ , CHH Bn $_{\beta}$ ), 4.43 (d,  $J$  = 7.5 Hz, 1H, H-1 $_{\beta}$ ), 4.38 – 4.33 (m, 1H, CHH Bn $_{\beta}$ , H-13 $_{\beta}$ ), 4.22 (q,  $J$  = 6.9 Hz, 1H, H-7 $_{\alpha}$ /H-5 $_{\alpha}$ ), 4.13 – 4.05 (m, 2H, H-5 $_{\alpha}$ /H-7 $_{\alpha}$ , H-5 $_{\beta}$ /H-7 $_{\beta}$ ), 3.91 (dt,  $J$  = 8.3, 3.6 Hz, 1H, H-11 $_{\beta}$ ), 3.87 (ddd,  $J$  = 6.9, 5.3, 3.8 Hz, 1H, H-11 $_{\alpha}$ ), 3.82 – 3.77 (m, 2H, H-2 $_{\alpha}$ , H-12 $_{\alpha}$ ), 3.69 – 3.67 (m, 1H, H-12 $_{\beta}$ ), 3.62 (dd,  $J$  = 6.2, 3.6 Hz, 1H, H-13 $_{\alpha}$ ), 3.61 – 3.58 (m, 1H, H-2 $_{\beta}$ , H-5 $_{\beta}$ /H-7 $_{\beta}$ ), 3.55 (q,  $J$  = 6.2 Hz, 1H, H-5 $_{\beta}$ /H-7 $_{\beta}$ ), 2.07 – 1.98 (m, 2H, H-3 $_{\alpha}$ ), 1.92 (ddd,  $J$  = 13.4, 4.8, 1.0 Hz, 1H, H-3 $_{\alpha}$ ), 1.77 – 1.66 (m, 2H, H-10 $_{\alpha}$ , H-10 $_{\beta}$ , H-10 $_{\beta}$ ), 1.64 – 1.59 (m, 3H, H-10 $_{\alpha}$ , H-3 $_{\beta}$ , H-3 $_{\beta}$ ), 1.39 – 1.37 (m, 2H, H-14 $_{\beta}$ ), 1.36 – 1.32 (m, 4H, H-14 $_{\alpha}$ ), 1.29 – 1.27 (m, 5H, H-6 $_{\beta}$ /H-8 $_{\beta}$ ), 1.12 (d,  $J$  = 6.9 Hz, 3H, H-6 $_{\alpha}$ /H-8 $_{\alpha}$ ), 1.00 (d,  $J$  = 6.3 Hz, 3H, H-6 $_{\alpha}$ /H-8 $_{\alpha}$ ), 0.97 (t,  $J$  = 7.4 Hz, 2H, H-9 $_{\beta}$ ), 0.92 (t,  $J$  = 7.5 Hz, 3H, H-9 $_{\alpha}$ ), 0.88 (td,  $J$  = 7.2, 0.9 Hz, 2H, H-6 $_{\beta}$ /H-8 $_{\beta}$ ); <sup>13</sup>C NMR (214 MHz, CDCl<sub>3</sub>, HSQC):  $\delta$  154.2, 154.1, 152.3, 147.2, 139.0, 138.8, 138.7, 138.2, 138.0, 136.0 (C<sub>q-arom</sub>), 131.3, 128.6, 128.5, 128.4, 128.3, 128.1, 128.0, 127.8, 127.7, 127.6, 127.5, 124.9, 114.2 (CH<sub>arom</sub>), 102.4 (C-1 $_{\beta}$ ), 93.3 (C-1 $_{\alpha}$ ), 85.0, 84.5, 83.2, 81.7 (C-12), 81.6 (C-5 $_{\alpha}$ ), 80.6, 80.6, 80.2, 80.1, 77.9 (C-11), 77.9, 75.4 (C-13), 75.4, 75.1, 74.2, 73.8 (C-2 $_{\beta}$ ), 73.6, 73.0, 72.0 (C-13), 72.0, 71.9 (C-2 $_{\alpha}$ ), 71.9, 71.6, 71.4, 71.4, 71.0, 70.8, 70.8, 70.8, 65.1 (C-5 $_{\beta}$ ), 64.8, 38.8 (C-3 $_{\beta}$ ), 36.7, 34.4, 33.9 (C-3 $_{\alpha}$ ), 32.1, 31.6, 31.2, 30.5, 30.3, 29.8, 29.7, 29.5, 29.4, 29.3, 29.1, 28.8, 26.1, 23.4, 22.8, 22.6, 16.1, 16.0, 15.2, 14.6 (C-6 $_{\beta}$ ), 14.3, 13.1, 12.9, 12.9 (C-6 $_{\alpha}$ ), 10.5 (C-9), 9.9 (C-9); HRMS: [M+Na]<sup>+</sup> calcd for C<sub>36</sub>H<sub>44</sub>O<sub>8</sub>Na 627.2934, found 627.2928.

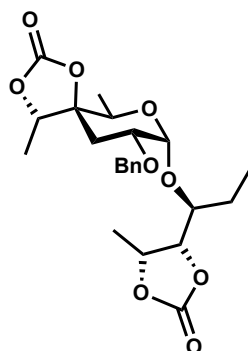

**1,2,6-Trideoxy-4,5-O-carbonate-D-altritol-2-O-benzyl-4,7-carbonate- $\alpha$ -D-yersinioside (S67).** The title compound was prepared according to general procedure III (17 mg, 37  $\mu$ mol, 74%,  $\alpha$ : $\beta$ ; >98:2). Flash column chromatography (80:20  $\rightarrow$  60:40; pentane:EtOAc) yielded the title compound as a colorless oil. TLC: R<sub>f</sub> 0.3 (pentane:EtOAc, 7:3, v:v); [ $\alpha$ ]<sub>D</sub><sup>20</sup> 48.2° (c 1.0, CHCl<sub>3</sub>); IR (neat, cm<sup>-1</sup>): 1006, 1063, 1790, 2923; <sup>1</sup>H NMR (500 MHz, CDCl<sub>3</sub>, HH-COSY, HSQC, HMBC):  $\delta$  7.37 – 7.27 (m, 5H, CH<sub>arom</sub>), 4.98 (d,  $J$  = 3.4 Hz, 1H, H-1), 4.95 – 4.88 (m, 1H, H-13), 4.70 (dd,  $J$  = 7.5, 3.5 Hz, 1H, H-12), 4.58 (d,  $J$  = 11.8 Hz, 1H, CHH Bn), 4.53 (d,  $J$  = 11.8 Hz, 1H, CHH Bn), 4.37 (q,  $J$  = 6.8 Hz, 1H, H-7), 4.03 (q,  $J$  =

6.3 Hz, 1H, H-5), 3.95 (ddd,  $J = 7.5, 5.6, 3.4$  Hz, 1H, H-9), 3.86 (ddd,  $J = 11.2, 5.4, 3.4$  Hz, 1H, H-2), 2.07 – 2.01 (m, 2H, H-3, H-3), 1.81 (dq,  $J = 15.2, 7.6, 4.9$  Hz, 1H, H-10'), 1.62 – 1.58 (m, 4H, H-10, H-14), 1.50 (d,  $J = 6.9$  Hz, 3H, H-8), 1.27 (d,  $J = 6.3$  Hz, 3H, H-6), 1.01 (t,  $J = 7.5$  Hz, 3H, H-11);  $^{13}\text{C}$  NMR (126 MHz,  $\text{CDCl}_3$ , HSQC):  $\delta$  154.6, 154.1 (O(C=O)O), 137.9 ( $\text{C}_{\text{q- arom}}$ ), 128.6, 128.0, 127.6 ( $\text{CH}_{\text{arom}}$ ), 93.0 (C-1), 82.0 (C-7), 78.7 (C-12), 77.2 (C-9), 76.1 (C-13), 71.7 (C-2), 71.6 ( $\text{CH}_2$  Bn), 65.9 (C-5), 33.5 (C-3), 22.2 (C-10), 15.3 (C-14), 14.9 (C-6), 13.1 (C-8), 10.3 (C-11); HRMS:  $[\text{M}+\text{Na}]^+$  calcd for  $\text{C}_{23}\text{H}_{30}\text{O}_9\text{Na}$  473.1788, found 473.1782.

### Results of compound 24

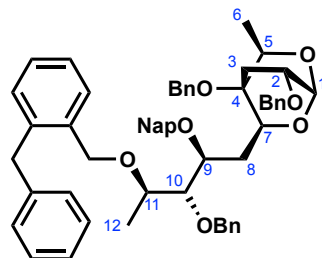

**(1*R*,3*S*,4*R*,5*R*,7*S*)-3-((2*S*,3*R*,4*R*)-4-((2-Benzylbenzyl)oxy)-3-*O*-benzyl-2-*O*-2-methylnaphthalene)pentyl)-4,7-di-*O*-benzyl-5-methyl-2,6-dioxabicyclo[2.2.2]octane (26).** The title compound was prepared according to general procedure III (16.7 mg, 19  $\mu\text{mol}$ , 85%). Flash column chromatography (90:10  $\rightarrow$  80:20; pentane:Et<sub>2</sub>O) yielded the title compound as a colorless oil. TLC:  $R_f$  0.3 (pentane:EtOAc, 9:1, v:v);  $[\alpha]_D^{20}$  5.6° (c 1.0,  $\text{CHCl}_3$ ); IR (neat,  $\text{cm}^{-1}$ ): 696, 734, 804, 1027, 1071, 1088, 1260, 1453;  $^1\text{H}$  NMR (500 MHz,  $\text{CDCl}_3$ , HH-COSY, HSQC):  $\delta$  7.87 – 6.95 (m, 31H,  $\text{CH}_{\text{arom}}$ ), 4.89 – 4.81 (m, 2H,  $\text{CHH Ph}$ ,  $\text{CHH Ph}$ ), 4.74 (d,  $J = 2.3$  Hz, 1H, H-1), 4.65 (m, 2H,  $\text{CHH Ph}$ ,  $\text{CHH Ph}$ ), 4.56 (d,  $J = 10.3$  Hz, 1H,  $\text{CHH Ph}$ ), 4.52 (d,  $J = 11.7$  Hz, 1H, H-7), 4.43 (d,  $J = 11.7$  Hz, 1H,  $\text{CHH Ph}$ ), 4.36 (d,  $J = 11.7$  Hz, 1H,  $\text{CHH Ph}$ ), 4.30 – 4.20 (m, 5H, H-5, H-9,  $\text{CHH Ph}$ ,  $\text{CHH Ph}$ ,  $\text{CHH Ph}$ ), 3.97 (s, 2H,  $\text{CH}_2\text{Bn}$ ), 3.75 – 3.66 (m, 2H, H-2, H-10), 3.42 (dq,  $J = 7.7, 6.0$  Hz, 1H, H-11), 2.31 – 2.22 (m, 2H, H-3, H-8), 2.15 (dd,  $J = 14.4, 10.8$  Hz, 1H, H-8), 1.98 (ddd,  $J = 13.8, 2.8, 1.5$  Hz, 1H, H-3), 1.24 (d,  $J = 6.4$  Hz, 3H, H-6), 1.20 (d,  $J = 6.1$  Hz, 3H, H-12);  $^{13}\text{C}$  NMR (126 MHz,  $\text{CDCl}_3$ , HSQC):  $\delta$  140.9, 139.3, 139.0, 138.0, 137.9, 136.8, 136.7 ( $\text{C}_{\text{q- arom}}$ ), 133.4, 132.9, 130.2, 129.8, 129.1, 128.6, 128.5, 128.4, 128.1, 128.0, 127.8, 127.8, 127.8, 127.5, 126.5, 126.1, 126.1, 125.9, 125.8, 125.7 ( $\text{CH}_{\text{arom}}$ ), 90.4 (C-1), 82.4 (C-10), 77.9 (C-9), 75.5 (C-11), 75.1 (C-7), 74.2 ( $\text{CH}_2$  Bn), 73.6 (C-5), 72.7 (C-2), 72.3 ( $\text{CH}_2$  Bn), 71.7 (C-4), 70.7, 69.3, 64.4, 38.1 ( $\text{CH}_2$  Bn), 30.4 (C-8), 28.4 (C-3), 16.9 (C-12), 15.8 (C-6); HRMS:  $[\text{M}+\text{Na}]^+$  calcd for  $\text{C}_{58}\text{H}_{60}\text{O}_7\text{Na}$  891.4237, found 891.4240.

### Results of compound S36

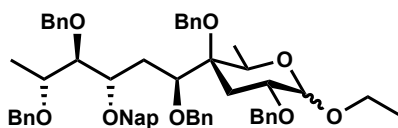

**Ethyl 2,4,7,10,11-penta-*O*-benzyl-9-*O*-2-methylnaphthalene-*D*-caryophylloside (S68).** The title compound was prepared according to general procedure III (20.6 mg, 22.5  $\mu\text{mol}$ , *quant.*,  $\alpha$ : $\beta$ ; 25:75). Flash column chromatography (95:5  $\rightarrow$  90:10; pentane:Et<sub>2</sub>O) yielded the title compound as a colorless oil. TLC:  $R_f$  0.8 (pentane:EtOAc, 8:2, v:v); IR (neat,  $\text{cm}^{-1}$ ): 696, 733, 1028, 1051, 1073, 1093, 1453; Data of the major stereoisomer ( $\beta$ -anomer):  $^1\text{H}$  NMR (500 MHz,  $\text{CDCl}_3$ , HH-COSY, HSQC):  $\delta$  7.94 – 6.68 (m, 32H,  $\text{CH}_{\text{arom}}$ ), 4.89 – 4.40 (m, 11H,  $\text{CHH Ph}$ ,  $\text{CHH Ph}$ ), 4.30 (d,  $J = 7.7$  Hz, 1H, H-1), 4.21 (d,  $J = 11.5$  Hz, 1H,  $\text{CHH Ph}$ ), 4.05 – 3.94 (m, 2H, H-9,  $\text{CH}_2\text{CH}_3$ ), 3.86 – 3.71 (m, 2H, H-5, H-10), 3.66 (ddd,  $J = 11.5, 7.9, 6.3$  Hz, 1H, H-2), 3.60 – 3.54 (m, 2H, H-7,  $\text{CH}_2\text{CH}_3$ ), 3.47 (dd,  $J = 7.7, 6.1$  Hz, 1H, H-11), 2.30 (dd,  $J = 14.6, 5.6$  Hz, 1H, H-3), 2.24 (dd,  $J = 14.5, 10.7$  Hz, 1H, H-8), 1.96 (dd,  $J = 14.6, 11.7$  Hz, 1H, H-3), 1.63 (ddd,  $J = 14.8, 9.8, 1.6$  Hz, 1H, H-8), 1.34 – 1.25 (m, 9H,  $\text{CH}_2\text{CH}_3$ , H-6, H-12);  $^{13}\text{C}$  NMR (126 MHz,  $\text{CDCl}_3$ , HSQC):  $\delta$  139.6, 139.0, 138.8, 138.8, 138.4, 136.2, 133.4 ( $\text{C}_{\text{q- arom}}$ ), 128.5, 128.5, 128.4, 128.3, 128.3, 128.2,

128.2, 128.2, 128.2, 128.1, 128.1, 128.1, 128.0, 127.8, 127.8, 127.8, 127.7, 127.7, 127.6, 127.6, 127.5, 127.5, 127.3, 127.1, 127.1, 127.0, 126.9, 126.8, 126.6, 126.4, 126.4, 126.3, 126.2, 126.1 (CH<sub>arom</sub>), 105.5 (C-1), 81.9 (C-10), 80.0 (C-4), 78.4 (C-7), 76.6 (C-9), 75.6 (C-5), 74.8 (C-2), 74.8 (C-11), 74.1, 73.5, 73.1, 70.9, 70.4, 66.7 (CH<sub>2</sub> Bn), 65.1 (CH<sub>2</sub>CH<sub>3</sub>), 33.2 (C-3), 31.9 (C-8), 16.8 (CH<sub>2</sub>CH<sub>3</sub>), 15.5 (C-12), 15.2 (C-6); Diagnostic signals of the minor stereoisomer ( $\alpha$ -isomer): <sup>1</sup>H NMR (500 MHz, CDCl<sub>3</sub>, HH-COSY, HSQC):  $\delta$  4.82 (d,  $J$  = 4.2 Hz, 1H, H-1); <sup>13</sup>C NMR (126 MHz, CDCl<sub>3</sub>, HSQC):  $\delta$  95.8 (H-1), 80.3 (C-4), 32.4 (C-3), 27.9 (C-8), 16.9 (CH<sub>2</sub>CH<sub>3</sub>), 15.3 (C-12), 15.2 (C-6); HRMS: [M+Na]<sup>+</sup> calcd for C<sub>60</sub>H<sub>66</sub>O<sub>8</sub>Na 937.4655, found 937.4667.

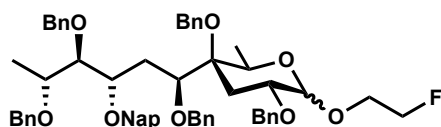

**2-Fluoroethyl 2,4,7,10,11-penta-O-benzyl-9-O-2-methylnaphthalene-D-caryophylloside (S69).** The title compound was prepared according to general procedure III (14.6 mg, 15.6  $\mu$ mol, 70%,  $\alpha$ : $\beta$ ; 33:67). Flash column chromatography (90:10  $\rightarrow$  80:20; pentane:Et<sub>2</sub>O) yielded the title compound as a colorless oil. TLC: R<sub>f</sub> 0.6 (pentane:EtOAc, 9:1, v:v); IR (neat, cm<sup>-1</sup>): 696, 734, 1028, 1071, 1094, 1453; Data of the major stereoisomer ( $\beta$ -anomer): <sup>1</sup>H NMR (500 MHz, CDCl<sub>3</sub>, HH-COSY, HSQC):  $\delta$  8.02 – 6.63 (m, 32H, CH<sub>arom</sub>), 4.90 – 4.40 (m, 13H, CH<sub>2</sub>F, CHH Ph, CHH Ph), 4.35 (d,  $J$  = 7.7 Hz, 1H, H-1), 4.21 (d,  $J$  = 11.5 Hz, 1H, CHH Ph), 4.08 – 3.96 (m, 3H, H-5, CH<sub>2</sub>CH<sub>2</sub>F), 3.88 – 3.71 (m, 4H, H-9, H-10), 3.67 (ddd,  $J$  = 13.1, 7.6, 5.7 Hz, 1H, H-2), 3.59 (d,  $J$  = 9.3 Hz, 1H, H-7), 3.51 – 3.44 (m, 1H, H-11), 2.32 (dd,  $J$  = 14.7, 5.7 Hz, 1H, H-3), 2.27 – 2.20 (m, 1H, H-8), 1.95 (dd,  $J$  = 14.6, 11.7 Hz, 1H, H-3), 1.63 (dd,  $J$  = 13.8, 10.2 Hz, 1H, H-8), 1.32 – 1.28 (m, 6H, H-6, H-12); <sup>13</sup>C NMR (126 MHz, CDCl<sub>3</sub>, HSQC):  $\delta$  139.5, 138.9, 138.7, 138.4, 136.2, 136.1, 133.4, 133.1 (C<sub>q-arom</sub>), 128.6, 128.5, 128.5, 128.4, 128.4, 128.3, 128.2, 128.2, 128.2, 128.1, 128.1, 127.9, 127.8, 127.8, 127.8, 127.7, 127.7, 127.6, 127.6, 127.5, 127.3, 127.1, 127.1, 127.1, 127.0, 126.9, 126.8, 126.7, 126.6, 126.4, 126.4, 126.3, 126.2, 126.1 (CH<sub>arom</sub>), 105.8 (C-1), 83.0 (d,  $J$  = 169.4 Hz, CH<sub>2</sub>F), 81.9 (C-9/C-10), 79.9 (C-4), 78.4 (C-7), 76.6 (C-5), 75.8 (C-9/C-10), 74.8 (C-2), 74.6, 74.1, 73.2, 70.9, 68.3, 66.7 (CH<sub>2</sub> Bn), 33.1 (C-3), 31.9 (C-8), 16.8 (C-12), 15.2 (C-6); Diagnostic signals of the minor stereoisomer ( $\alpha$ -isomer): <sup>1</sup>H NMR (500 MHz, CDCl<sub>3</sub>, HH-COSY, HSQC):  $\delta$  4.85 (d,  $J$  = 3.8 Hz, 1H, H-1); <sup>13</sup>C NMR (126 MHz, CDCl<sub>3</sub>, HSQC):  $\delta$  96.5 (C-1), 82.8 (d,  $J$  = 169.5 Hz, CH<sub>2</sub>F), 80.3 (C-4); HRMS: [M+Na]<sup>+</sup> calcd for C<sub>60</sub>H<sub>65</sub>O<sub>8</sub>FNa 955.4561, found 955.4578.

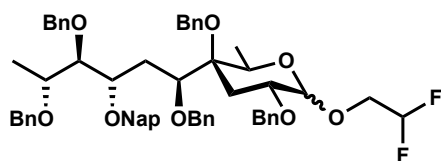

**2,2-Difluoroethyl 2,4,7,10,11-penta-O-benzyl-9-O-2-methylnaphthalene-D-caryophylloside (S70).** The title compound was prepared according to general procedure III (18.4 mg, 19.3  $\mu$ mol, 86%,  $\alpha$ : $\beta$ ; 63:37). Flash column chromatography (95:5  $\rightarrow$  80:20; pentane:Et<sub>2</sub>O) yielded the title compound as a colourless oil. TLC: R<sub>f</sub> 0.5 (pentane:EtOAc, 9:1, v:v); IR (neat, cm<sup>-1</sup>): 696, 732, 1028, 1070, 1453; Data of the major stereoisomer ( $\alpha$ -anomer): <sup>1</sup>H NMR (500 MHz, CDCl<sub>3</sub>, HH-COSY, HSQC):  $\delta$  8.28 – 6.49 (m, 32H, CH<sub>arom</sub>), 5.86 (tt,  $J$  = 55.7, 4.4 Hz, 1H, CHF<sub>2</sub>), 4.89 – 4.83 (m, 2H, CHH Ph, CHH Ph), 4.81 (d,  $J$  = 2.7 Hz, 1H, H-1), 4.71 – 4.41 (m, 8H, CHH Ph, CHH Ph, CHH Ph, CHH Ph), 4.24 – 4.16 (m, 2H, CHH Ph, CHH Ph), 4.08 – 3.93 (m, 4H, H-5, H-9), 3.81 – 3.67 (m, 6H, H-2, H-10, CH<sub>2</sub>CHF<sub>2</sub>), 3.54 (d,  $J$  = 9.3 Hz, 1H, H-7), 3.50 – 3.40 (m, 1H, H-11), 2.24 – 2.16 (m, 3H, H-8, H-3), 2.10 – 2.04 (m, 1H, H-3), 1.36 – 1.25 (m, 6H, H-6, H-12); <sup>13</sup>C NMR (126 MHz, CDCl<sub>3</sub>, HSQC):  $\delta$  139.3, 138.8, 138.8, 138.5, 138.3, 136.1, 133.4, 133.1 (C<sub>q-arom</sub>), 128.6, 128.5, 128.4, 128.4, 128.4, 128.3, 128.3, 128.2, 128.2, 128.1, 128.1, 128.0, 127.8, 127.8, 127.8, 127.8, 127.7, 127.6, 127.6, 127.5, 127.4, 127.2, 127.1, 127.1, 126.9, 126.8, 126.7, 126.6, 126.4, 126.4, 126.3, 126.2, 126.2 (CH<sub>arom</sub>), 114.5 (t,  $J$  = 241.2 Hz, CHF<sub>2</sub>), 97.0 (C-1), 82.0 (C-10), 80.2 (C-4), 79.0 (C-7), 76.7 (C-5/C-9), 75.0 (C-11), 74.1, 73.9 (CH<sub>2</sub> Bn), 71.9 (C-2), 71.4, 71.0, 70.7 (CH<sub>2</sub> Bn), 68.9 (C-5/C-9), 66.8 (d,  $J$  = 45.7 Hz, CH<sub>2</sub>CHF<sub>2</sub>), 65.3 (CH<sub>2</sub> Bn), 32.5 (C-8), 27.9 (C-3), 16.9



(C-12), 15.3 (C-6); Diagnostic signals of the minor stereoisomer ( $\beta$ -isomer):  $^1\text{H}$  NMR (500 MHz,  $\text{CDCl}_3$ , HH-COSY, HSQC):  $\delta$  4.34 (d,  $J = 7.6$  Hz, 1H, H-1), 3.64 (ddd,  $J = 13.3, 7.7, 5.8$  Hz, 2H, H-2), 3.59 (d,  $J = 9.1$  Hz, 1H, H-7), 2.32 (dd,  $J = 14.6, 5.7$  Hz, 1H, H-3), 1.92 (dd,  $J = 14.6, 11.7$  Hz, 1H, H-3), 1.65 (dd,  $J = 13.8, 9.7$  Hz, 2H, H-8);  $^{13}\text{C}$  NMR (126 MHz,  $\text{CDCl}_3$ , HSQC):  $\delta$  114.6 (t,  $J = 241.2$  Hz,  $\text{CHF}_2$ ), 105.9 (C-1), 79.8 (C-4), 66.99 (d,  $J = 57.6$  Hz), 33.0 (C-8), 31.9 (C-3), 16.8 (C-12), 15.2 (C-6); HRMS:  $[\text{M}+\text{Na}]^+$  calcd for  $\text{C}_{60}\text{H}_{64}\text{O}_8\text{F}_2\text{Na}$  973.4467, found 973.4478.

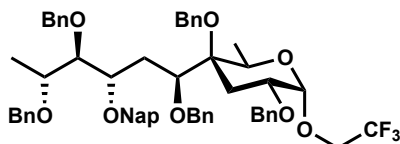

**2,2,2-Trifluoroethyl 2,4,7,10,11-penta-O-benzyl-9-O-2-methylnaphthalene-D-caryophylloside (S71).** The title compound was prepared according to general procedure III (14.3 mg, 15.3  $\mu\text{mol}$ , 68%,  $\alpha:\beta$ ; >98:2). Flash column chromatography (95:5  $\rightarrow$  90:10; pentane:EtOAc) yielded the title compound as a colorless oil. TLC:  $R_f$  0.8 (pentane:EtOAc, 8:2, v:v);  $[\alpha]_D^{20}$  3.2 $^\circ$  (c 1.0,  $\text{CHCl}_3$ ); IR (neat,  $\text{cm}^{-1}$ ): 696, 734, 1028, 1071, 1095, 1159, 1278, 1453;  $^1\text{H}$  NMR (500 MHz,  $\text{CDCl}_3$ , HH-COSY, HSQC):  $\delta$  7.89 – 6.74 (m, 32H,  $\text{CH}_{\text{arom}}$ ), 4.89 (d,  $J = 3.4$  Hz, 1H, H-1), 4.88 – 4.81 (m, 2H,  $\text{CHH Ph}$ ,  $\text{CHH Ph}$ ), 4.68 – 4.41 (m, 9H,  $\text{CHH Ph}$ ,  $\text{CHH Ph}$ ), 4.17 (d,  $J = 11.5$  Hz, 1H,  $\text{CHH Ph}$ ), 4.05– 3.92 (m, 2H, H-5, H-9), 3.88 (dd,  $J = 11.7, 8.8$  Hz, 1H,  $\text{CH}_2\text{CF}_3$ ), 3.77 (ddd,  $J = 12.2, 4.7, 3.6$  Hz, 1H, H-2), 3.74 – 3.71 (m, 1H, H-10), 3.54 (d,  $J = 9.1$  Hz, 1H, H-7), 3.43 (dt,  $J = 11.6, 5.8$  Hz, 1H, H-11), 2.27 – 2.17 (m, 2H, H-3, H-8), 2.10 (dd,  $J = 13.8, 12.4$  Hz, 1H, H-3), 1.65 (dd,  $J = 13.7, 9.6$  Hz, 1H, H-8), 1.30 (d,  $J = 1.3$  Hz, 3H, H-12), 1.29 (d,  $J = 1.9$  Hz, 3H, H-6);  $^{13}\text{C}$  NMR (126 MHz,  $\text{CDCl}_3$ )  $\delta$  139.2, 138.8, 138.7, 138.5, 138.3, 136.0, 133.3, 133.1 ( $\text{C}_{\text{q-arom}}$ ), 130.2, 129.8, 129.1, 128.6, 128.6, 128.5, 128.4, 128.4, 128.4, 128.3, 128.2, 128.1, 128.1, 128.0, 128.0, 128.0, 127.9, 127.8, 127.8, 127.7, 127.6, 127.5, 127.4, 127.1, 127.0, 126.8, 126.7, 126.6, 126.4, 126.2, 126.1, 126.1, 125.9, 125.8, 125.7 ( $\text{CH}_{\text{arom}}$ ), 96.9 (C-1), 82.0 (C-10), 80.1 (C-4), 78.9 (C-7), 76.7 (C-9), 75.0 (C-11), 74.1, 73.9 ( $\text{CH}_2$  Bn), 71.7 (C-2), 71.2, 71.0, 70.7 ( $\text{CH}_2$  Bn), 69.2 (C-5), 65.3 ( $\text{CH}_2$  Bn), 64.7 (dd,  $J = 69.1, 38.4$  Hz,  $\text{CH}_2\text{CF}_3$ ), 32.5 (C-8), 27.8 (C-3), 16.9 (C-12), 15.3 (C-6); HRMS:  $[\text{M}+\text{Na}]^+$  calcd for  $\text{C}_{60}\text{H}_{63}\text{O}_8\text{F}_3\text{Na}$  991.4373, found 991.4390.

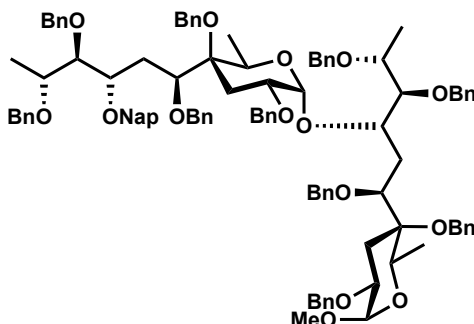

**Methyl 2,4,7,10,11-penta-O-benzyl-9-O-[2,4,7,10,11-penta-O-benzyl-9-O-2-methylnaphthalene- $\alpha$ -D-caryophyllosyl]- $\alpha$ -D-caryophylloside (S72).** The title compound was prepared according to general procedure VI with acceptor **S33** (1.2 eq. acceptor used instead of 2.0 eq.) yielding title compound (7.3 mg, 4.5  $\mu\text{mol}$ , 20%,  $\alpha:\beta$ ; >98:2). Flash column chromatography (95:5  $\rightarrow$  80:20; pentane:EtOAc) yielded the title compound as a colorless oil. TLC:  $R_f$  0.7 (pentane:EtOAc, 9:1, v:v);  $[\alpha]_D^{20}$  2.1 $^\circ$  (c 0.4,  $\text{CHCl}_3$ ); IR (neat,  $\text{cm}^{-1}$ ): 696, 734, 1028, 1072, 1096, 1453;  $^1\text{H}$  NMR (500 MHz,  $\text{CDCl}_3$ , HH-COSY, HSQC):  $\delta$  7.84 – 6.74 (m, 57H,  $\text{CH}_{\text{arom}}$ ), 5.02 (d,  $J = 3.5$  Hz, 1H, H-1'), 4.82 – 4.72 (m, 2H,  $\text{CHH Ph}$ ,  $\text{CHH Ph}$ ), 4.67 (d,  $J = 3.4$  Hz, 1H, H-1), 4.63 – 4.32 (m, 20H,  $\text{CHH Ph}$ ,  $\text{CHH Ph}$ ), 4.28 – 4.19 (m, 3H, H-5, H-9, H-9'), 4.10 (m, 2H, H-10, H-10'), 3.99 (m, 2H, H-5', H-7'), 3.80 (dd,  $J = 9.8, 5.9$  Hz, 1H, H-2'), 3.76 – 3.66 (m, 1H, H-2), 3.60 (d,  $J = 9.6$  Hz, 1H, H-7), 3.45 (p,  $J = 6.3$  Hz, 1H, H-11), 3.35 (td,  $J = 6.7, 6.3, 3.3$  Hz, 1H, H-11'), 3.31 (s, 3H,  $\text{CH}_3\text{OMe}$ ), 2.40 – 2.32 (m, 3H, H-3, H-3', H-8'), 2.26 (dd,  $J = 14.6, 11.1$  Hz, 1H, H-8), 2.09 – 1.98 (m, 2H, H-3, H-

3'), 1.83 (dd,  $J = 14.1, 9.6$  Hz, 1H, H-8'), 1.65 (dd,  $J = 14.0, 9.7$  Hz, 1H, H-8), 1.30 (d,  $J = 6.5$  Hz, 3H, H-6), 1.30 (d,  $J = 6.4$  Hz, 3H, H-6'), 1.21 (d,  $J = 6.1$  Hz, 3H, H-12'), 1.15 (d,  $J = 6.2$  Hz, 3H, H-12);  $^{13}\text{C}$  NMR (126 MHz,  $\text{CDCl}_3$ )  $\delta$  139.4, 139.3, 139.1, 139.0, 138.9, 138.9, 138.6, 138.5, 138.4, 136.0, 135.3, 133.0 ( $\text{C}_{\text{q- arom}}$ ), 128.7, 128.5, 128.4, 128.4, 128.4, 128.4, 128.4, 128.3, 128.3, 128.3, 128.2, 128.2, 128.2, 128.1, 128.1, 128.1, 128.0, 128.0, 127.9, 127.8, 127.8, 127.7, 127.7, 127.6, 127.6, 127.5, 127.4, 127.3, 127.3, 127.2, 127.2, 127.1, 127.1, 127.0, 127.0, 127.0, 126.9, 126.9, 126.8, 126.5, 126.4, 126.3, 126.3, 126.3, 126.2, 126.1, 125.4 ( $\text{CH}_{\text{arom}}$ ), 98.3 (C-1), 97.5 (C-1'), 85.3 (C-2'), 81.7 (C-2), 80.6, 80.4 (C-4, C-4'), 80.2 (C-5'), 79.7 (C-5), 79.4 (C-7), 76.7 (C-7'), 75.2, 74.9 (C-11, C-11'), 74.9, 74.2, 74.0, 73.8, 72.6 ( $\text{CH}_2$  Bn), 72.5, 72.0 (C-10, C-10'), 71.2, 70.9, 70.8, 70.7, 70.6 ( $\text{CH}_2$  Bn), 69.8, 68.8 (C-9, C-9'), 65.7, 65.2 ( $\text{CH}_2$  Bn), 55.0 ( $\text{CH}_3$  OMe), 33.4 (C-8'), 32.7 (C-8), 27.6, 22.5 (C-3, C-3'), 16.8 (C-12'), 16.7 (C-12), 15.5, 15.3 (C-6, C-6'); HRMS:  $[\text{M}+\text{Na}]^+$  calcd for  $\text{C}_{106}\text{H}_{116}\text{O}_{15}\text{Na}$  1651.8212, found 1651.8168.

### Results of compound 25

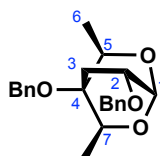

**(1R,3R,4R,5S,7S)-4,7-Di-O-benzyl-3,5-dimethyl-2,6-dioxabicyclo[2.2.2]octane (S73).** The title compound was prepared according to general procedure III (on a 30  $\mu\text{mol}$  scale) yielding title compound (8.8 mg, 25  $\mu\text{mol}$ , 83%). Flash column chromatography (95:5  $\rightarrow$  80:20; pentane: $\text{Et}_2\text{O}$ ) yielded the title compound as a colorless oil. TLC:  $R_f$  0.2 (pentane: $\text{Et}_2\text{O}$ , 8:2, v:v);  $[\alpha]_D^{20} -2.4^\circ$  (c 1.0,  $\text{CHCl}_3$ ); IR (neat,  $\text{cm}^{-1}$ ): 696, 1027, 1066, 1091, 1127;  $^1\text{H}$  NMR (500 MHz,  $\text{CDCl}_3$ , HH-COSY, HSQC):  $\delta$  7.40 – 7.19 (m, 10H,  $\text{CH}_{\text{arom}}$ ), 4.86 (d,  $J = 2.1$  Hz, 1H, H-1), 4.58 (s, 2H,  $\text{CH}_2\text{Bn}$ ), 4.44 (d,  $J = 10.6$  Hz, 1H, CHH Ph), 4.41 (d,  $J = 10.6$  Hz, 1H, CHH Ph), 4.32 (qd,  $J = 6.4, 2.0$  Hz, 1H, H-7), 4.25 (qd,  $J = 6.4, 1.6$  Hz, 1H, H-5), 3.74 (ddd,  $J = 10.0, 3.3, 2.1$  Hz, 1H, H-2), 2.29 (ddd,  $J = 13.7, 10.0, 2.1$  Hz, 1H, H-3), 2.02 (ddd,  $J = 13.7, 3.3, 1.7$  Hz, 1H, H-3), 1.46 (d,  $J = 6.4$  Hz, 3H, H-8), 1.26 (d,  $J = 6.4$  Hz, 3H, H-6);  $^{13}\text{C}$  NMR (126 MHz,  $\text{CDCl}_3$ , HSQC):  $\delta$  138.1, 137.8 ( $\text{C}_{\text{q- arom}}$ ), 128.7, 128.6, 128.0, 127.9, 127.8, 127.5 ( $\text{CH}_{\text{arom}}$ ), 90.7 (C-1), 75.1 (C-7), 74.3 (C-5), 72.6 (C-2), 72.3 (C-4), 70.7 (4- $\text{OCH}_2\text{Bn}$ ), 64.9 (2- $\text{OCH}_2\text{Bn}$ ), 27.2 (C-3), 16.1 (C-6), 15.4 (C-8); HRMS:  $[\text{M}+\text{Na}]^+$  calcd for  $\text{C}_{22}\text{H}_{26}\text{O}_4\text{Na}$  377.1729, found 377.1729.

### Results of compound 3

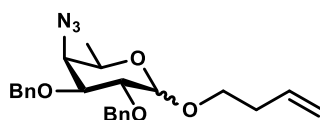

**3-Butene 4-azido-2,3-di-O-benzyl-4,6-dideoxy-D-galactopyranoside (S74).** The title compound was prepared according to general procedure III (18 mg, 42  $\mu\text{mol}$ , 85%,  $\alpha:\beta$ ; 39:61) as a colorless oil. The title compound was also prepared according to general procedure IV (13 mg, 31  $\mu\text{mol}$ , 61%,  $\alpha:\beta$ ; 62:38). The title compound was also prepared according to general procedure V (19 mg, 45  $\mu\text{mol}$ , 95%,  $\alpha:\beta$ ; >98:2). TLC:  $R_f$  0.6 (pentane: $\text{Et}_2\text{O}$ , 9:1, v:v);  $[\alpha]_D^{20} 24.3^\circ$  (c 1.0,  $\text{CHCl}_3$ ,  $\alpha$ -anomer); IR (neat,  $\text{cm}^{-1}$ ): 697, 1045, 1105, 1709, 2109, 2916; Data of the  $\alpha$ -anomer:  $^1\text{H}$  NMR (400 MHz,  $\text{CDCl}_3$ ):  $\delta$  7.42 – 7.27 (m, 10H,  $\text{CH}_{\text{arom}}$ ), 5.81 (ddt,  $J = 17.0, 10.2, 6.7$  Hz, 1H, H-9), 5.10 (dq,  $J = 17.2, 1.6$  Hz, 1H, H-10), 5.08 – 5.00 (m, 1H, H-10), 4.85 (d,  $J = 11.7$  Hz, 1H, CHH Bn), 4.81 (d,  $J = 12.0$  Hz, 1H, CHH Bn), 4.74 (d,  $J = 11.7$  Hz, 1H, CHH Bn), 4.70 (d,  $J = 3.8$  Hz, 1H, H-1), 4.64 (d,  $J = 12.0$  Hz, 1H, CHH Bn), 4.03 (dd,  $J = 9.9, 3.7$  Hz, 1H, H-3), 3.96 (qd,  $J = 6.5, 1.6$  Hz, 1H, H-5), 3.83 (dd,  $J = 9.9, 3.8$  Hz, 1H, H-2), 3.72 (dd,  $J = 3.8, 1.5$  Hz, 1H, H-4), 3.56 (ddt,  $J = 44.4, 9.9, 7.0$  Hz, 2H, H-7), 2.37 (qt,  $J = 7.0, 1.4$  Hz, 2H, H-8, H-8), 1.21 (d,  $J = 6.5$  Hz, 3H, H-6);  $^{13}\text{C}$  NMR (101 MHz,  $\text{CDCl}_3$ ):  $\delta$  138.6, 138.4 ( $\text{C}_{\text{q- arom}}$ ), 135.1 (C-9), 128.6, 128.5, 128.1, 127.9, 127.9, 127.8 ( $\text{CH}_{\text{arom}}$ ), 116.8 (C-10), 97.5 (C-1), 78.2 (C-3), 76.2 (C-2), 73.6, 73.3 ( $\text{CH}_2$  Bn), 67.7 (C-7), 65.2 (C-4), 64.5 (C-5), 34.0 (C-8), 17.4 (C-6); Diagnostic signals of the  $\beta$ -anomer:  $^1\text{H}$  NMR (500 MHz,  $\text{CDCl}_3$ ):  $\delta$  4.30 (d,  $J = 7.6$  Hz, 1H, H-1);  $^{13}\text{C}$  NMR (101 MHz,  $\text{CDCl}_3$ ):  $\delta$  103.7 (C-1), 73.6, 73.3 ( $\text{CH}_2$  Bn), 67.7 (C-7); HRMS:  $[\text{M}+\text{Na}]^+$  calcd for  $\text{C}_{24}\text{H}_{29}\text{O}_4\text{N}_3\text{Na}$  446.2056, found 446.2050.

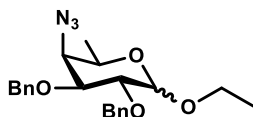

**Ethyl 4-azido-2,3-di-O-benzyl-4,6-dideoxy-D-galactopyranoside (S75).** The title compound was prepared according to general procedure III (18 mg, 44  $\mu\text{mol}$ , 87%,  $\alpha:\beta$ ; 36:64) as a colorless oil. The title compound was also prepared according to general procedure IV (19 mg, 47  $\mu\text{mol}$ , 93%,  $\alpha:\beta$ ; 62:38). The title compound was also prepared according to general procedure V (15 mg, 38  $\mu\text{mol}$ , 75%,  $\alpha:\beta$ ; >98:2). TLC:  $R_f$  0.7 (pentane:EtOAc, 9:1, v:v); IR (neat,  $\text{cm}^{-1}$ ): 696, 1028, 1045, 1061, 2102; Data of the  $\beta$ -anomer:  $^1\text{H}$  NMR (500 MHz,  $\text{CDCl}_3$ ):  $\delta$  7.48 – 7.23 (m, 10H,  $\text{CH}_{\text{arom}}$ ), 4.91 (d,  $J = 10.8$  Hz, 1H,  $\text{CHH}$  Ph), 4.76 (d,  $J = 10.2$  Hz, 1H,  $\text{CHH}$  Ph), 4.74 (d,  $J = 10.9$  Hz, 1H,  $\text{CHH}$  Ph), 4.64 (d,  $J = 12.1$  Hz, 1H,  $\text{CHH}$  Ph), 4.29 (d,  $J = 7.3$  Hz, 1H, H-1), 3.96 (dq,  $J = 9.4, 7.1$  Hz, 1H,  $\text{CH}_2\text{CH}_3$ ), 3.66 – 3.62 (m, 3H, H-2, H-3, H-4), 3.56 (dd,  $J = 9.5, 7.1$  Hz, 1H,  $\text{CH}_2\text{CH}_3$ ), 3.53 – 3.49 (m, 1H, H-5), 1.30 (d,  $J = 6.3$  Hz, 3H, H-6), 1.26 (t,  $J = 7.1$  Hz, 3H,  $\text{CH}_2\text{CH}_3$ );  $^{13}\text{C}$  NMR (126 MHz,  $\text{CDCl}_3$ , HSQC):  $\delta$  138.7, 138.1 ( $\text{C}_{\text{q-arom}}$ ), 128.6, 128.5, 128.4, 128.2, 128.1, 127.9, 127.9, 127.7 ( $\text{CH}_{\text{arom}}$ ), 103.5 (C-1), 81.1 (C-2/C-3), 79.3 (C-2/C-3), 75.4, 73.1 ( $\text{CH}_2$  Bn), 68.9 (C-5), 65.5 ( $\text{CH}_2\text{CH}_3$ ), 64.0 (C-4), 17.7 (C-6), 15.4 ( $\text{CH}_2\text{CH}_3$ ); Diagnostic signals of the  $\alpha$ -anomer:  $^1\text{H}$  NMR (500 MHz,  $\text{CDCl}_3$ ):  $\delta$  4.85 (d,  $J = 11.7$  Hz, 1H,  $\text{CHH}$  Ph), 4.82 (d,  $J = 12.1$  Hz, 1H,  $\text{CHH}$  Ph), 4.74 (d,  $J = 10.9$  Hz, 1H,  $\text{CHH}$  Ph), 4.69 (d,  $J = 3.8$  Hz, 1H, H-1), 4.04 (dd,  $J = 9.9, 3.7$  Hz, 1H, H-3), 3.82 (dd,  $J = 9.9, 3.8$  Hz, 1H, H-2), 3.72 (dd,  $J = 3.8, 1.5$  Hz, 1H, H-4), 1.22 (t,  $J = 7.1$  Hz, 3H,  $\text{CH}_2\text{CH}_3$ ), 1.21 (d,  $J = 6.5$  Hz, 2H, H-6);  $^{13}\text{C}$  NMR (126 MHz,  $\text{CDCl}_3$ , HSQC):  $\delta$  138.5, 138.4 ( $\text{C}_{\text{q-arom}}$ ), 97.1 (C-1), 78.3 (C-3), 76.2 (C-2), 73.6, 73.3 ( $\text{CH}_2$  Bn), 65.2 (C-4), 64.3 (C-5), 63.6 ( $\text{CH}_2\text{CH}_3$ ), 17.4 (C-6), 15.1 ( $\text{CH}_2\text{CH}_3$ ); HRMS:  $[\text{M}+\text{Na}]^+$  calcd for  $\text{C}_{22}\text{H}_{27}\text{O}_4\text{N}_3\text{Na}$  420.1899, found 420.1892.

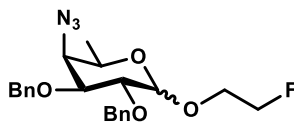

**2-Mono-fluoroethyl 4-azido-2,3-di-O-benzyl-4,6-dideoxy-D-galactopyranoside (S76).** The title compound was prepared according to general procedure III (21 mg, 50  $\mu\text{mol}$ , *quant.*,  $\alpha:\beta$ ; 48:52) as a colorless oil. The title compound was also prepared according to general procedure IV (21 mg, 50  $\mu\text{mol}$ , *quant.*,  $\alpha:\beta$ ; 81:19). The title compound was also prepared according to general procedure V (17 mg, 38  $\mu\text{mol}$ , 79%,  $\alpha:\beta$ ; >98:2). TLC:  $R_f$  0.3 (pentane:EtOAc, 9:1, v:v); IR (neat,  $\text{cm}^{-1}$ ): 1041, 1089, 2102; Data of the  $\beta$ -anomer:  $^1\text{H}$  NMR (500 MHz,  $\text{CDCl}_3$ ):  $\delta$  7.75 – 7.12 (m, 10H,  $\text{CH}_{\text{arom}}$ ), 4.93 (d,  $J = 10.6$  Hz, 1H,  $\text{CHH}$  Ph), 4.85 (d,  $J = 11.7$  Hz, 1H,  $\text{CHH}$  Ph), 4.77 (m, 1H,  $\text{CHH}$  Ph), 4.72 (d,  $J = 10.8$  Hz, 1H,  $\text{CHH}$  Ph), 4.70 – 4.48 (m, 2H,  $\text{CH}_2\text{F}$ ), 4.36 (d,  $J = 7.0$  Hz, 1H, H-1), 4.13 – 3.98 (m, 1H,  $\text{CH}_2\text{CH}_2\text{F}$ ), 3.88 – 3.62 (m, 4H, H-2, H-3, H-4,  $\text{CH}_2\text{CH}_2\text{F}$ ), 3.53 (qd,  $J = 6.3, 1.1$  Hz, 1H, H-5), 1.31 (d,  $J = 6.3$  Hz, 3H, H-6);  $^{13}\text{C}$  NMR (126 MHz)  $\delta$  138.5, 138.0 ( $\text{C}_{\text{q-arom}}$ ), 131.2, 129.4, 128.6, 128.5, 128.4, 128.1, 127.8, 127.7 ( $\text{CH}_{\text{arom}}$ ), 103.8 (C-1), 83.38 (d,  $J = 5.1$  Hz,  $\text{CH}_2\text{F}$ ), 81.0 (C-2/C-3), 79.0 (C-2/C-3), 73.3, 73.2 ( $\text{CH}_2$  Bn), 69.0 (C-5), 67.21 (d,  $J = 20.0$  Hz,  $\text{CH}_2\text{CHF}_2$ ), 63.8 (C-4), 17.6 (C-6); Diagnostic signals of the  $\alpha$ -anomer:  $^1\text{H}$  NMR (500 MHz,  $\text{CDCl}_3$ ):  $\delta$  4.72 (d,  $J = 5.8$  Hz, 1H, H-1), 1.21 (d,  $J = 6.5$  Hz, 3H, H-6);  $^{13}\text{C}$  NMR (126 MHz,  $\text{CDCl}_3$ )  $\delta$  138.4, 138.3 ( $\text{C}_{\text{q-arom}}$ ), 97.8 (C-1), 82.0 (d,  $J = 5.2$  Hz,  $\text{CH}_2\text{F}$ ), 78.1 (C-3), 76.1 (C-2), 75.4, 73.7 ( $\text{CH}_2$  Bn), 68.7 (d,  $J = 20.2$  Hz,  $\text{CH}_2\text{CHF}_2$ ), 65.0 (C-4), 64.6 (C-5), 17.4 (C-6); HRMS:  $[\text{M}+\text{Na}]^+$  calcd for  $\text{C}_{22}\text{H}_{26}\text{O}_4\text{N}_3\text{FNa}$  438.1805, found 438.1800.

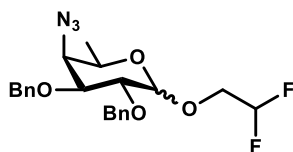

**2,2-Di-fluoroethyl 4-azido-2,3-di-O-benzyl-4,6-dideoxy-D-galactopyranoside (S77).** The title compound was prepared according to general procedure III (20 mg, 46  $\mu\text{mol}$ , 91%,  $\alpha:\beta$ ; 77:23) as a colorless oil. The title compound was also prepared according to general procedure IV (19 mg, 43  $\mu\text{mol}$ , 85%,  $\alpha:\beta$ ; >98:2). The title compound was also prepared according to general procedure V (17 mg, 41

$\mu\text{mol}$ , 81%,  $\alpha:\beta$ ; >98:2). TLC:  $R_f$  0.7 (pentane:EtOAc, 9:1, v:v); IR (neat,  $\text{cm}^{-1}$ ): 696, 1046, 1067, 1091, 2104; Data of the  $\alpha$ -anomer:  $^1\text{H}$  NMR (500 MHz,  $\text{CDCl}_3$ ):  $\delta$  7.80 – 7.22 (m, 10H,  $\text{CH}_{\text{arom}}$ ), 5.92 (tt,  $J = 55.6, 4.4$  Hz, 1H,  $\text{CHF}_2$ ), 4.85 (m, 1H,  $\text{CHH}$  Bn), 4.82 (m, 1H,  $\text{CHH}$  Bn), 4.74 (d,  $J = 11.7$  Hz, 1H,  $\text{CHH}$  Bn), 4.69 (d,  $J = 3.8$  Hz, 1H, H-1), 4.62 (d,  $J = 11.9$  Hz, 1H,  $\text{CHH}$  Bn), 4.02 (dd,  $J = 9.9, 3.6$  Hz, 1H, H-3), 3.95 (qd,  $J = 6.6, 1.5$  Hz, 1H, H-5), 3.86 (dd,  $J = 9.9, 3.8$  Hz, 1H, H-2), 3.74 – 3.64 (m, 3H,  $\text{CH}_2\text{CHF}_2$ , H-4), 1.22 (d,  $J = 6.5$  Hz, 3H, H-6);  $^{13}\text{C}$  NMR (126 MHz,  $\text{CDCl}_3$ ):  $\delta$  138.3, 138.2 ( $\text{C}_{\text{q-arom}}$ ), 128.6, 128.5, 128.4, 128.1, 128.0, 127.9, 127.9, 127.7 ( $\text{CH}_{\text{arom}}$ ), 114.1 (t,  $J = 241.3$  Hz,  $\text{CHF}_2$ ), 98.5 (C-1), 77.9 (C-3), 75.9 (C-2), 73.9, 73.3 ( $\text{CH}_2$  Bn), 67.4 (t,  $J = 28.7$  Hz,  $\text{CH}_2\text{CHF}_2$ ), 65.0 (C-5), 64.8 (C-4), 17.3 (C-6); Diagnostic signals of the  $\beta$ -anomer:  $^1\text{H}$  NMR (500 MHz,  $\text{CDCl}_3$ ):  $\delta$  5.85 (tt,  $J = 55.1, 4.1$  Hz, 1H,  $\text{CHF}_2$ ), 4.34 (d,  $J = 7.2$  Hz, 1H, H-1), 4.14 (tdd,  $J = 13.7, 11.9, 3.9$  Hz, 1H,  $\text{CH}_2\text{CHF}_2$ ), 3.53 (qd,  $J = 6.3, 1.1$  Hz, 1H, H-5), 1.31 (d,  $J = 6.3$  Hz, 3H, H-6);  $^{13}\text{C}$  NMR (126 MHz)  $\delta$  138.3, 137.8 ( $\text{C}_{\text{q-arom}}$ ), 114.3 (dd,  $J = 242.3, 239.7$  Hz,  $\text{CHF}_2$ ), 103.9 (C-1), 80.9 (C-3), 78.8 (C-2), 75.5, 73.2 ( $\text{CH}_2$  Bn), 68.5 (dd,  $J = 30.8, 26.4$  Hz,  $\text{CH}_2\text{CHF}_2$ ), 68.3 (C-5), 63.7 (C-4), 17.5 (C-6); HRMS:  $[\text{M}+\text{Na}]^+$  calcd for  $\text{C}_{22}\text{H}_{25}\text{O}_4\text{N}_3\text{F}_2\text{Na}$  456.1711, found 456.1704.

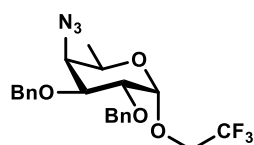

**2,2,2-Tri-fluoroethyl 4-azido-2,3-di-O-benzyl-4,6-dideoxy- $\alpha$ -D-galactopyranoside (S78).** The title compound was prepared according to general procedure III (16 mg, 35  $\mu\text{mol}$ , 70%,  $\alpha:\beta$ ; >98:2) as a colorless oil. The title compound was also prepared according to general procedure IV (17 mg, 37  $\mu\text{mol}$ , 73%,  $\alpha:\beta$ ; >98:2). TLC:  $R_f$  0.8 (pentane:EtOAc, 9:1, v:v); IR (neat,  $\text{cm}^{-1}$ ): 1103, 1156, 1277, 2109;  $^1\text{H}$  NMR (400 MHz,  $\text{CDCl}_3$ ):  $\delta$  7.59 – 7.28 (m, 10H,  $\text{CH}_{\text{arom}}$ ), 4.84 (m, 2H,  $\text{CHH}$  Bn,  $\text{CHH}$  Bn), 4.76 (d,  $J = 5.5$  Hz, 1H, H-1), 4.74 (m, 1H,  $\text{CHH}$  Bn), 4.63 (d,  $J = 11.9$  Hz, 1H,  $\text{CHH}$  Bn), 4.04 (dd,  $J = 9.9, 3.6$  Hz, 1H, H-3), 3.95 (qd,  $J = 6.5, 1.3$  Hz, 1H, H-5), 3.92 – 3.82 (m, 3H, H-2,  $\text{CH}_2\text{CF}_3$ ), 3.75 (dd,  $J = 3.6, 1.4$  Hz, 1H, H-4), 1.23 (d,  $J = 6.5$  Hz, 3H, H-6);  $^{13}\text{C}$  NMR (101 MHz):  $\delta$  138.3, 138.2 ( $\text{C}_{\text{q-arom}}$ ), 129.6, 129.4, 129.1, 128.9, 128.7, 128.6, 128.6, 128.1, 128.0, 127.9 ( $\text{CH}_{\text{arom}}$ ), 122.5 ( $\text{CF}_3$ ), 98.5 (C-1), 77.8 (C-3), 75.8 (C-2), 73.8, 73.4 ( $\text{CH}_2$  Bn), 65.3 (C-5), 65.2 (q,  $J = 34.9$  Hz,  $\text{CH}_2\text{CF}_3$ ), 64.8 (C-4), 17.3 (C-6);  $^{19}\text{F}$  NMR (471 MHz,  $\text{CDCl}_3$ ):  $\delta$  -73.7 (t,  $J = 8.3$  Hz); HRMS:  $[\text{M}+\text{Na}]^+$  calcd for  $\text{C}_{22}\text{H}_{24}\text{O}_4\text{N}_3\text{F}_3\text{Na}$  474.1617, found 474.1614.

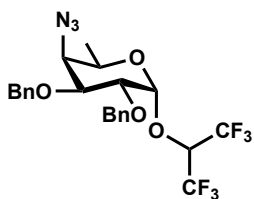

**1,1,1,3,3,3-Hexafluoropropyl 2,3-di-O-benzyl-4-azido-4,6-dideoxy- $\alpha$ -D-galactopyranoside (S79).** The title compound was prepared according to general procedure III (18 mg, 35  $\mu\text{mol}$ , 69%,  $\alpha:\beta$ ; >98:2) as a colorless oil. Flash column chromatography (95:5  $\rightarrow$  80:20; pentane:Et<sub>2</sub>O) yielded the title compound. TLC:  $R_f$  0.8 (pentane:EtOAc, 9:1, v:v);  $[\alpha]_D^{20}$  47.0° (c 1.0,  $\text{CHCl}_3$ ); IR (neat,  $\text{cm}^{-1}$ ): 1105, 1196, 1287, 2110;  $^1\text{H}$  NMR (500 MHz,  $\text{CDCl}_3$ , HH-COSY, HSQC):  $\delta$  7.90 – 7.28 (m, 10H), 5.06 (d,  $J = 3.9$  Hz, 1H, H-1), 4.84 (d,  $J = 11.5$  Hz, 1H,  $\text{CHH}$  Bn), 4.76 (m, 1H,  $\text{CHH}$  Bn), 4.74 (m, 1H,  $\text{CHH}$  Bn), 4.69 (d,  $J = 11.5$  Hz, 1H,  $\text{CHH}$  Bn), 4.41 (hept,  $J = 5.9$  Hz, 1H,  $\text{CH}(\text{CF}_3)_2$ ), 4.10 – 4.00 (m, 2H, H-3, H-4), 3.94 (dd,  $J = 10.0, 3.9$  Hz, 1H, H-2), 3.79 (dd,  $J = 3.4, 1.3$  Hz, 1H, H-5), 1.24 (d,  $J = 6.4$  Hz, 3H, H-6);  $^{13}\text{C}$  NMR (126 MHz,  $\text{CDCl}_3$ , HSQC):  $\delta$  138.0, 137.9 ( $\text{C}_{\text{q-arom}}$ ), 136.7, 135.5, 133.7, 131.7, 130.4, 129.6, 129.1, 128.9, 128.6, 127.7 ( $\text{CH}_{\text{arom}}$ ), 100.1 (C-1), 77.6 (C-3/C-4), 75.1 (C-2), 73.8, 73.4 ( $\text{CH}_2$  Bn), 73.1 (p,  $J = 33.0$  Hz,  $\text{CH}(\text{CF}_3)_2$ ), 66.4 (C-3/C-4), 64.5 (C-5), 17.2 (C-6); HRMS:  $[\text{M}+\text{Na}]^+$  calcd for  $\text{C}_{23}\text{H}_{23}\text{O}_4\text{N}_3\text{F}_6\text{Na}$  542.1490, found 542.1489.

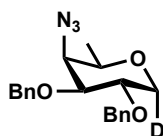

**2,3-Di-O-benzyl-4-azido-1,4,6-trideoxy-1- $\alpha$ -deuterio-D-galactopyranoside (S80).** The title compound was prepared according to general procedure III (15 mg, 41  $\mu$ mol, 82%,  $\alpha$ : $\beta$ ; >98:2) as a colorless oil. Flash column chromatography (90:10  $\rightarrow$  80:20; pentane:EtOAc) yielded the title compound. TLC:  $R_f$  0.5 (pentane:EtOAc, 9:1, v:v);  $[\alpha]_D^{20}$  11.4° (c 1.0, CHCl<sub>3</sub>); IR (neat, cm<sup>-1</sup>): 1093, 1124, 2108; <sup>1</sup>H NMR (500 MHz, CDCl<sub>3</sub>, HH-COSY, HSQC):  $\delta$  7.44 – 7.26 (m, 10H, CH<sub>arom</sub>), 4.87 – 4.76 (m, 3H, CH<sub>2</sub> Bn), 4.64 (d,  $J$  = 11.5 Hz, 1H, CH<sub>2</sub> Bn), 3.97 (d,  $J$  = 5.6 Hz, 1H, H-1), 3.89 (dd,  $J$  = 9.0, 5.6 Hz, 1H, H-2), 3.72 (dd,  $J$  = 3.7, 1.3 Hz, 1H, H-4), 3.67 (dd,  $J$  = 9.1, 3.7 Hz, 1H, H-3), 3.47 (qd,  $J$  = 6.3, 1.3 Hz, 1H, H-5), 1.27 (d,  $J$  = 6.3 Hz, 3H, H-6); <sup>2</sup>H NMR (77 MHz, CDCl<sub>3</sub>)  $\delta$  3.12 (s, 1H); <sup>13</sup>C NMR (126 MHz, CDCl<sub>3</sub>, HSQC):  $\delta$  138.4, 138.1 (C<sub>q-arom</sub>), 129.5, 128.6, 128.6, 128.0, 127.9, 127.9, 127.9, 124.9 (CH<sub>arom</sub>), 82.8 (C-3), 74.6 (C-2), 73.9 (CH<sub>2</sub> Bn), 73.8 (C-5), 72.7 (CH<sub>2</sub> Bn), 68.34 (t,  $J$  = 21.5 Hz, C-1), 64.3 (C-4), 18.0 (C-6); HRMS: [M+Na]<sup>+</sup> calcd for C<sub>19</sub>H<sub>20</sub>O<sub>3</sub>N<sub>3</sub>DNa 377.1700, found 377.1697.

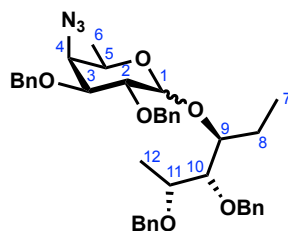

**1,2,6-Trideoxy-4,5-di-O-benzyl-D-altritol-2,3-di-O-benzyl-4-azido-4,6-dideoxy-D-galactopyranoside (S81).** The title compound was prepared according to the general procedure III giving title glycoside as a white solid (25.2 mg, 76%,  $\alpha$ : $\beta$ ; 58:42). TLC:  $R_f$  0.5 (pentane:Et<sub>2</sub>O, 4:1, v:v) for  $\alpha$ -isomer; TLC:  $R_f$  0.2 (pentane:Et<sub>2</sub>O, 4:1, v:v); NMR data reported as a mixture of  $\alpha$ - and  $\beta$ -anomers; <sup>1</sup>H NMR (500 MHz, CDCl<sub>3</sub>, HH-COSY, HSQC):  $\delta$  7.39 – 7.20 (m, 40H, CH<sub>arom</sub>), 4.87 (d,  $J$  = 4.0 Hz, 1H, H-1 $_{\alpha}$ ), 4.83 – 4.65 (m, 2H, CH<sub>2</sub> Bn), 4.59 (d,  $J$  = 11.6 Hz, 1H, CHH Bn), 4.51 – 4.47 (m, 2H, CH<sub>2</sub> Bn), 4.37 (d,  $J$  = 7.1 Hz, H-1 $_{\beta}$ ), 4.32 (d,  $J$  = 11.6 Hz, 1H, CHH Bn), 3.94 (m, 1H, H-9 $_{\beta}$ ), 3.91 (dd,  $J$  = 3.6, 9.9 Hz, 1H, H-3 $_{\alpha}$ ), 3.85 – 3.81 (m, 2H, H-9 $_{\alpha}$ , H-2 $_{\alpha}$ ), 3.77 (m, 1H, H-5 $_{\beta}$ ), 3.72 (m, 1H, H-9), 3.70 – 3.65 (m, 2H, H-11, H-5 $_{\beta}$ ), 3.65 – 3.59 (m, 2H, H-2 $_{\beta}$ , H-4 $_{\beta}$ ), 3.58 (dd,  $J$  = 3.4, 1.5 Hz, 1H, H-4 $_{\alpha}$ ), 3.46 (m, 1H, H-5 $_{\alpha}$ ), 1.74 – 1.56 (m, 4H, H-8 $_{\beta}$ , H-8 $_{\beta}$ , H-8 $_{\alpha}$ , H-8 $_{\alpha}$ ), 1.29 – 1.65 (m, 6H, H-6 $_{\alpha}$ , H-12), 1.04 (d,  $J$  = 6.4 Hz, 3H, H-6 $_{\beta}$ ), 0.98 (t,  $J$  = 7.4 Hz, 3H, H-7), 0.91 (t,  $J$  = 7.6 Hz, 3H, H-7); <sup>13</sup>C NMR (126 MHz, CDCl<sub>3</sub>, HSQC):  $\delta$  139.0, 138.9, 138.8, 138.8, 138.7, 138.5, 138.3, 137.8 (C<sub>q-arom</sub>), 128.6, 128.5, 128.4, 128.4, 128.4, 128.3, 128.0, 128.0, 127.9, 127.9, 127.8, 127.7, 127.7, 127.6, 127.6, 127.6, 127.5, 127.4 (CH<sub>arom</sub>), 102.0 (C-1 $_{\beta}$ ), 96.1 (C-1 $_{\alpha}$ ), 83.0, 81.9, 81.6, 80.7, 79.1, 78.5 (C-9), 77.8 (C-3 $_{\alpha}$ ), 76.2 (C-2 $_{\alpha}$ ), 75.4, 75.2, 75.1, 74.0, 73.7, 73.4, 72.9, 70.7, 70.6, 68.9, 65.1 (C-4 $_{\alpha}$ ), 64.9 (C-5 $_{\beta}$ ), 63.7, 29.8, 23.5, 22.3 (C-8), 17.6 (C-6 $_{\beta}$ ), 17.3, 15.8, 15.5, 10.3 (C-7), 9.6 (C-7); HRMS: [M+Na]<sup>+</sup> calcd for C<sub>40</sub>H<sub>47</sub>N<sub>3</sub>O<sub>6</sub>Na 688.3363, found 688.3357.

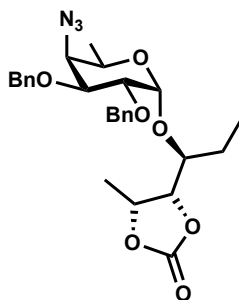

**1,2,6-Trideoxy-4,5-O-carbonate-D-altritol-4-azido-2,3-di-O-benzyl-4,6-dideoxy- $\alpha$ -D-galactopyranoside (S82).** The title compound was prepared according to general procedure III (17 mg, 33  $\mu$ mol, 66%,  $\alpha$ : $\beta$ ; >98:2). Flash column chromatography (90:10  $\rightarrow$  70:30; pentane:EtOAc) yielded the title compound as a colorless oil. TLC:  $R_f$  0.6 (pentane:EtOAc, 7:3, v:v);  $[\alpha]_D^{20}$  45.2° (c 1.0, CHCl<sub>3</sub>); IR

(neat,  $\text{cm}^{-1}$ ): 698, 737, 1012, 1053, 1093, 1800, 2106, 2928;  $^1\text{H}$  NMR (500 MHz,  $\text{CDCl}_3$ , HH-COSY, HSQC, HMBC):  $\delta$  7.43 – 7.30 (m, 10H,  $\text{CH}_{\text{arom}}$ ), 4.89 (d,  $J = 3.9$  Hz, 1H, H-1), 4.88 – 4.82 (m, 2H,  $\text{CHH}$  Ph, H-9), 4.81 – 4.74 (m, 2H,  $\text{CH}_2$  Bn), 4.67 – 4.61 (m, 2H,  $\text{CHH}$  Bn, H-8), 4.05 – 3.95 (m, 2H, H-3, H-5), 3.87 (dd,  $J = 10.0, 3.8$  Hz, 1H, H-2), 3.83 (q,  $J = 5.6$  Hz, 1H, H-7), 3.78 (dd,  $J = 3.6, 1.6$  Hz, 1H, H-4), 1.75 (dq,  $J = 14.9, 7.5, 5.8$  Hz, 1H, H-11), 1.65 (dq,  $J = 14.8, 7.4, 5.9$  Hz, 1H, H-11'), 1.50 (d,  $J = 6.7$  Hz, 3H, H-10), 1.24 (d,  $J = 6.5$  Hz, 3H, H-6), 1.00 (t,  $J = 7.5$  Hz, 3H, H-12);  $^{13}\text{C}$  NMR (126 MHz,  $\text{CDCl}_3$ , HSQC):  $\delta$  154.5 (O(C=O)O), 138.4, 138.0 ( $\text{C}_{\text{q-arom}}$ ), 131.2, 129.5, 128.7, 128.6, 128.5, 128.0, 127.9, 127.9, 124.9 ( $\text{CH}_{\text{arom}}$ ), 96.3 (C-1), 78.8 (C-8), 78.0 (C-3), 77.2 (C-7), 76.1 (C-9), 75.8 (C-2), 74.1, 73.0 ( $\text{CH}_2$  Bn), 65.5 (C-5), 64.7 (C-4), 22.7 (C-11), 17.5 (C-6), 15.1 (C-10), 9.6 (C-12); HRMS:  $[\text{M}+\text{Na}]^+$  calcd for  $\text{C}_{27}\text{H}_{33}\text{O}_7\text{Na}$  534.2216, found 534.2211.

## Structural proofs

### Compound 21

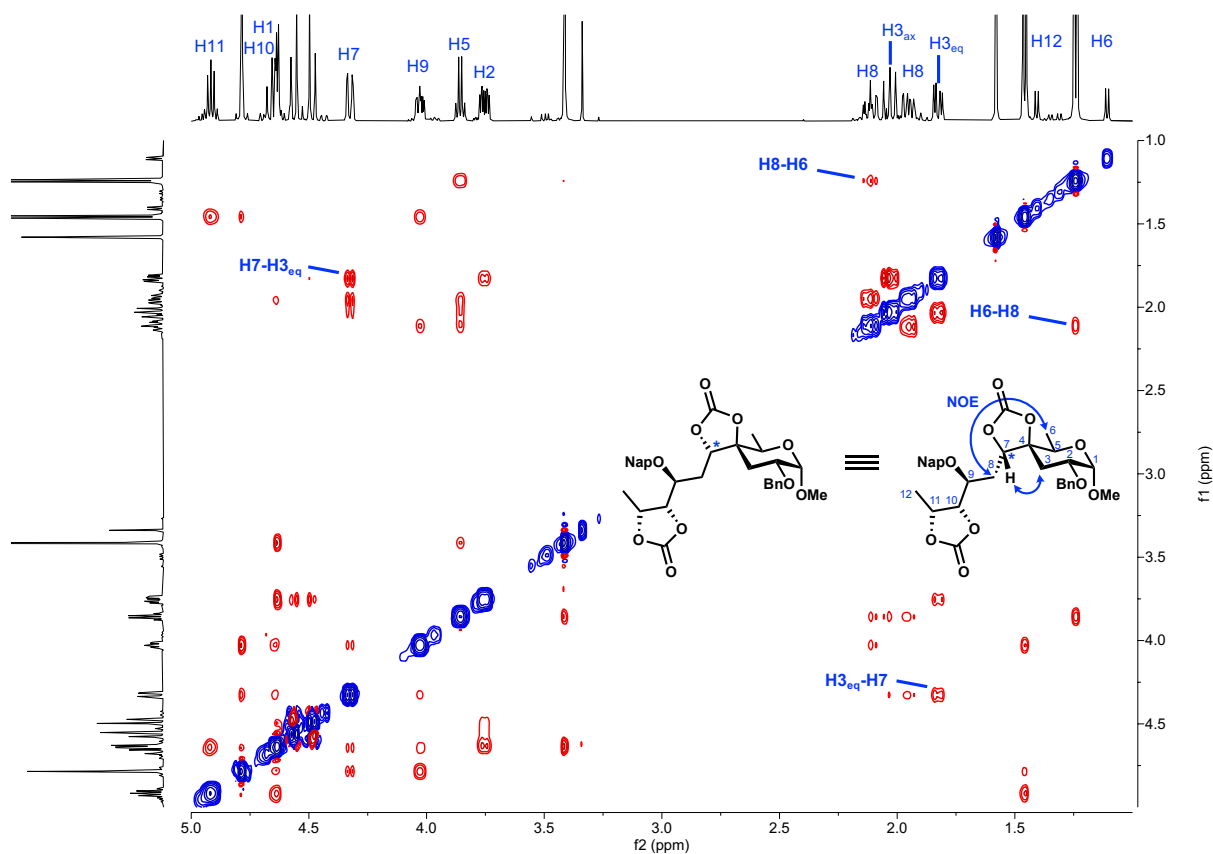

**Figure S12.** NOESY spectrum of compound **21**. The key NOE interactions for **21** can be found between  $\text{H3}_{\text{eq}}$ -H7 and H6-H8.

Compound S29 and S30

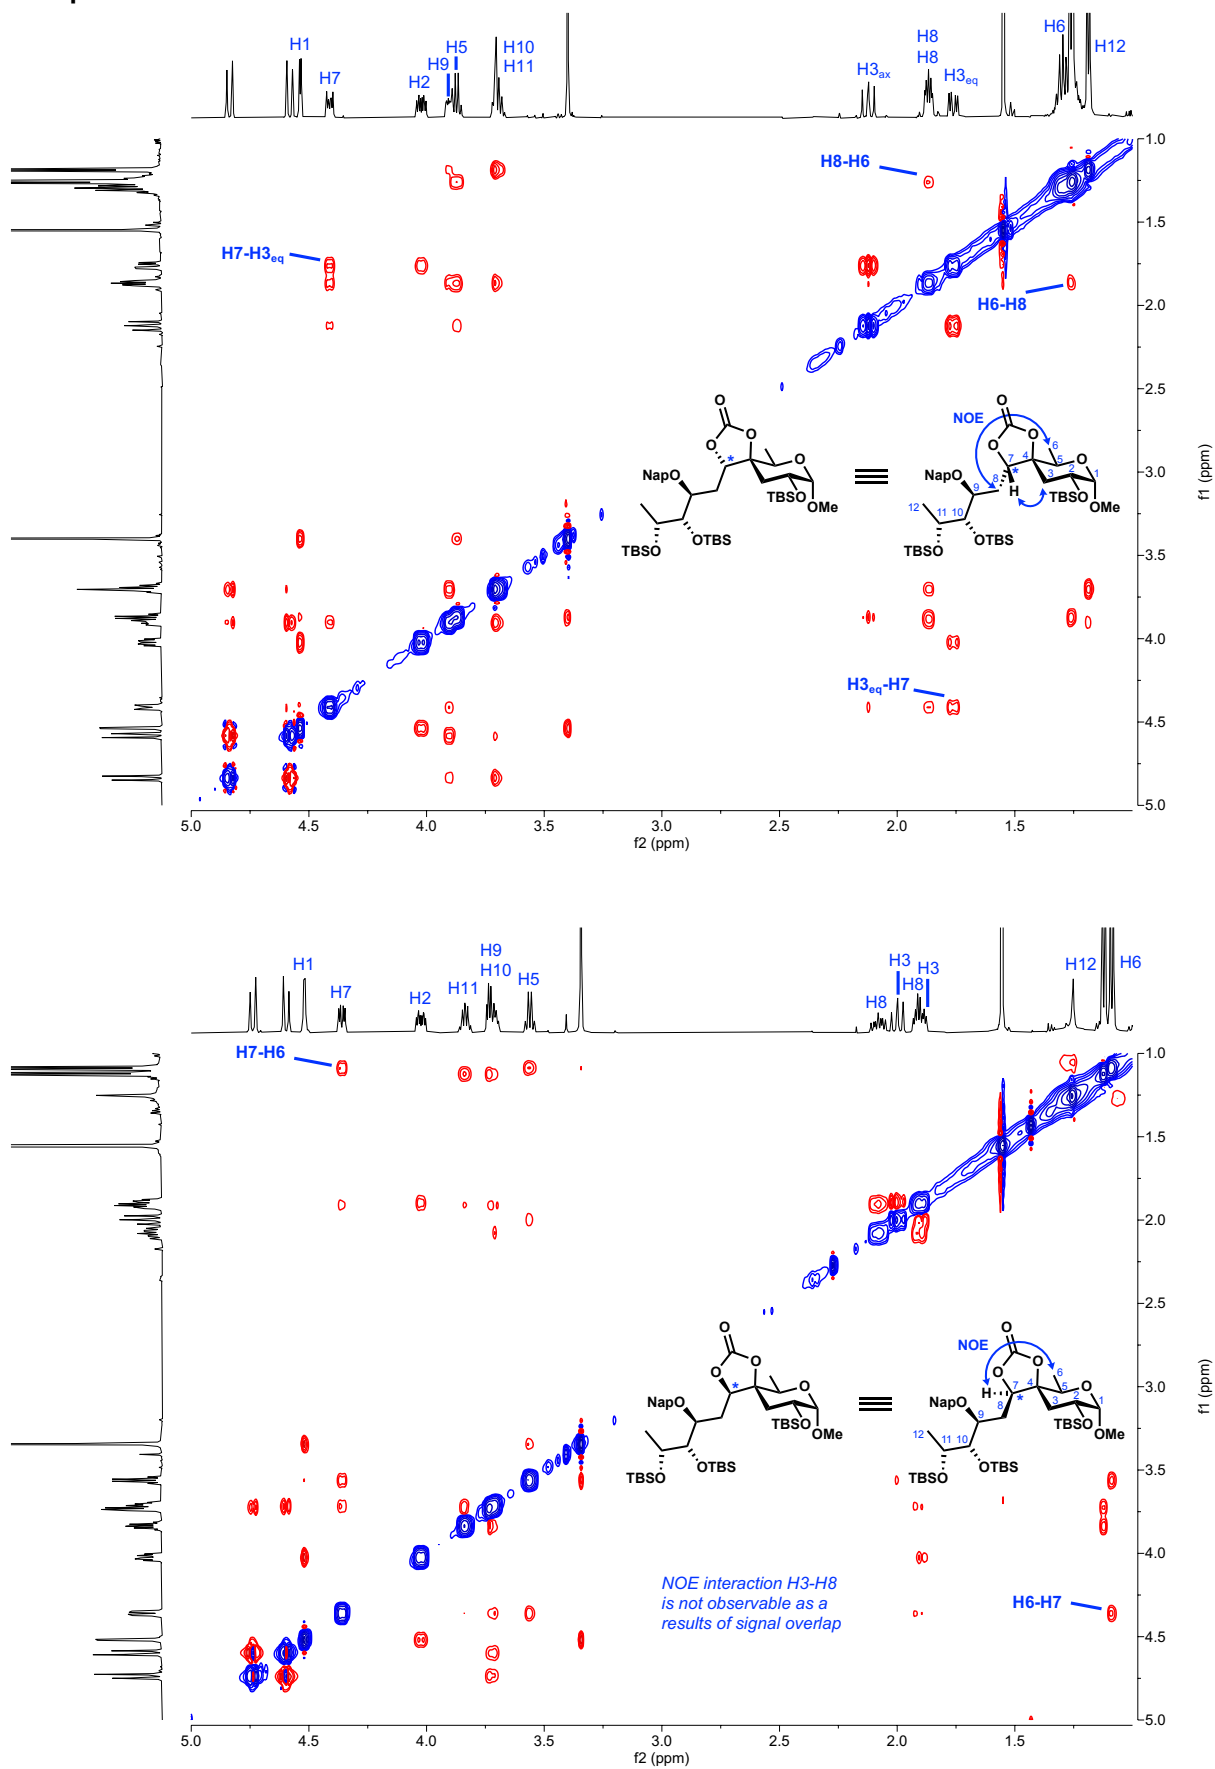

Figure S13. NOESY spectra of compound S29 and S30. (A) The key NOE interactions for S29 can be found between  $\text{H3}_{\text{eq}}$ - $\text{H7}$  and  $\text{H6}$ - $\text{H8}$ . (B) The key NOE interaction for S30 can be found between  $\text{H6}$ - $\text{H7}$ .

## Compound S22

<sup>1</sup>H NMR H-H coupling constants

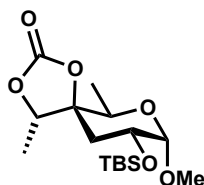

**H-1:** d,  $J = 3.4$  Hz (eq<sup>H-1</sup>-ax<sup>H-2</sup>)

**H-2:** ddd,  $J = 3.5$  Hz (ax<sup>H-2</sup>-eq<sup>H-1</sup>),  $5.0$  Hz (ax<sup>H-2</sup>-eq<sup>H-3</sup>),  $11.6$  Hz (ax<sup>H-2</sup>-ax<sup>H-3</sup>)

**H-3<sub>ax</sub>:** dd,  $J = 11.6$  Hz (ax<sup>H-3</sup>-ax<sup>H-2</sup>),  $13.5$  Hz (ax<sup>H-3</sup>-eq<sup>H-3</sup>)

**H-3<sub>eq</sub>:** dd,  $J = 4.9$  Hz (eq<sup>H-3</sup>-ax<sup>H-2</sup>),  $13.5$  Hz (eq<sup>H-3</sup>-ax<sup>H-3</sup>)

**H-5:** q,  $J = 6.4$  Hz (ax<sup>H-5</sup>-H-6)

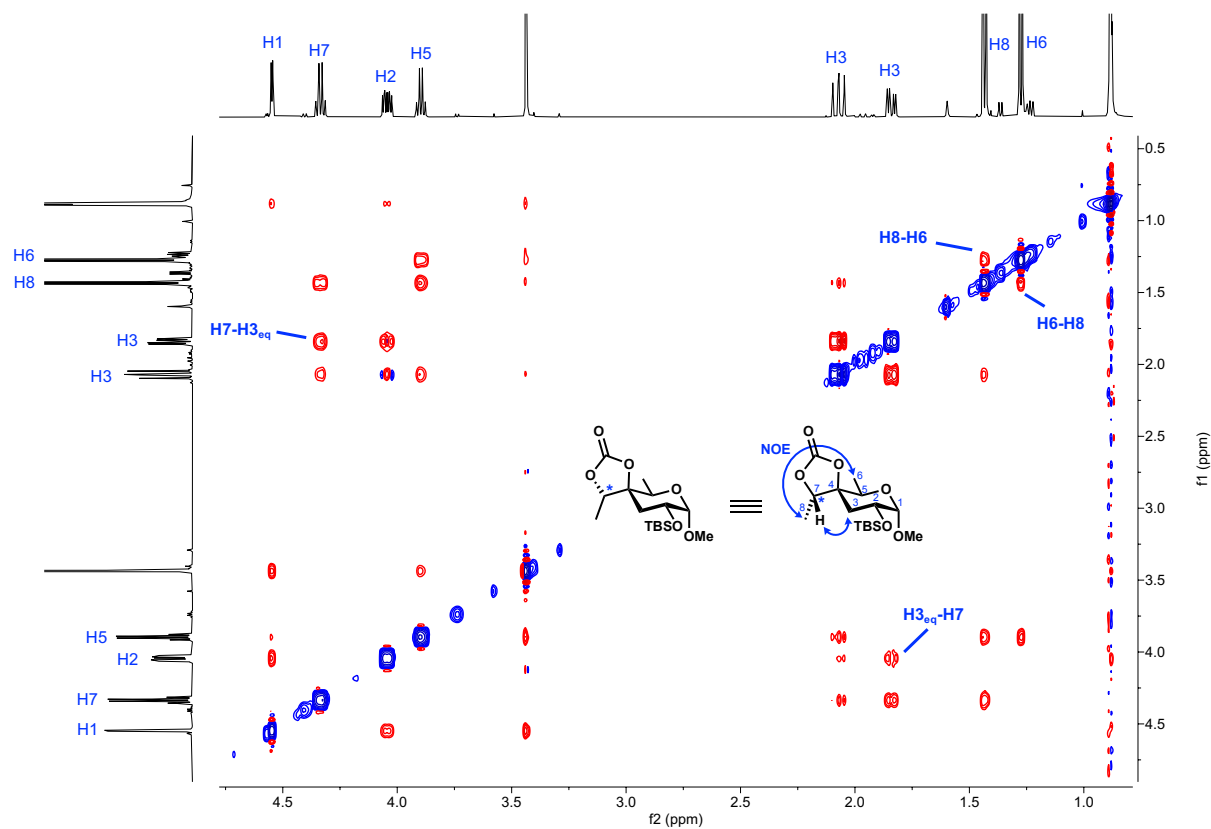

**Figure S14.** NOESY spectra of compound **S22**. The key NOE interactions for **S22** can be found between H3<sub>eq</sub>-H7 and H6-H8.



## Compound 24

$^1\text{H}$  NMR H-H coupling constants

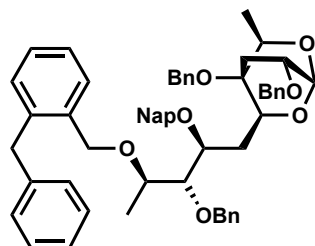

**H-1:** d,  $J = 2.3$  Hz ( $\text{eq}^{\text{H-1-ax}^{\text{H-2}}}$ )

**H-2:** overlaps with H-10

**H-3<sub>ax</sub>:** overlaps with H-8

**H-3<sub>eq</sub>:** dd,  $J = 2.8$  Hz ( $\text{eq}^{\text{H-3-ax}^{\text{H-2}}}$ ),  $13.8$  Hz ( $\text{eq}^{\text{H-3-ax}^{\text{H-3}}}$ )

**H-5:** overlaps with H-9

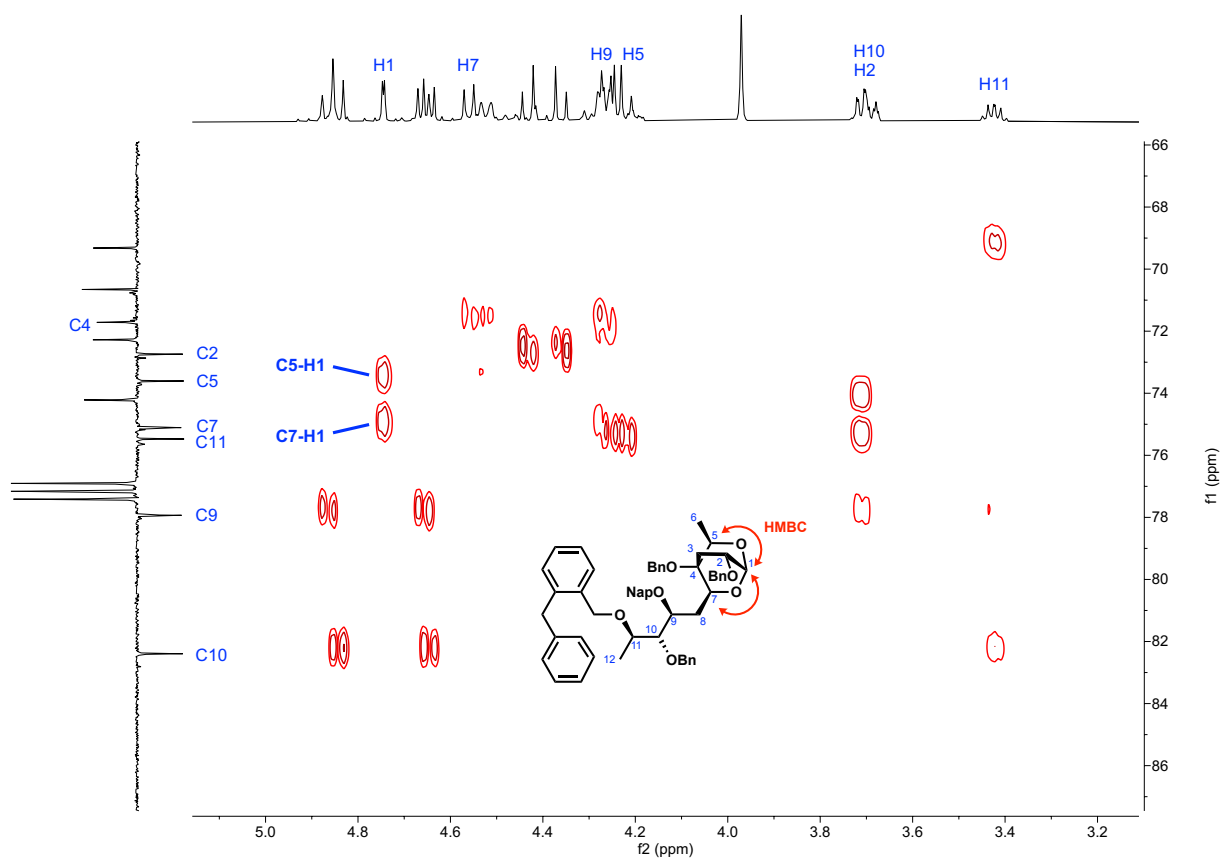

**Figure S15.** HMBC spectrum of compound 24. The key long-range heteronuclear correlation for 24 can be found between C5-H1 and C7-H1.

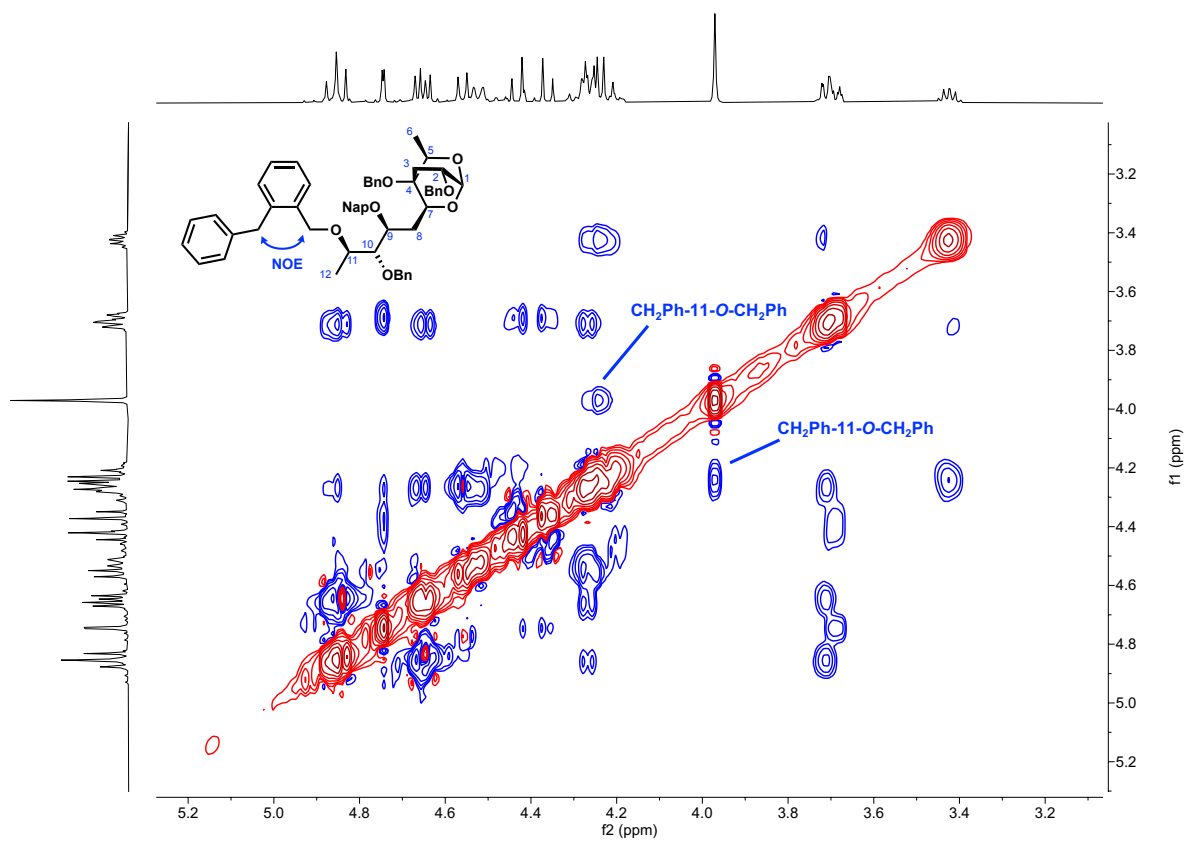

**Figure S16.** NOESY spectra of compound **24**. The key NOE interactions for **24** can be found between CH<sub>2</sub>Bn and 11-O-CH<sub>2</sub>Bn.

### Compound S68- $\alpha$

<sup>1</sup>H NMR H-H coupling constants

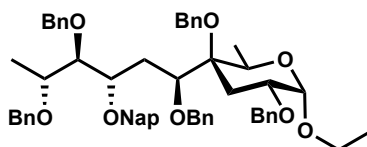

---

**H-1:** d,  $J = 2.1$  Hz (eq<sup>H-1</sup>-ax<sup>H-2</sup>)

**H-2:** ddd,  $J = 2.1$  Hz (ax<sup>H-2</sup>-eq<sup>H-1</sup>), 3.3 Hz (ax<sup>H-2</sup>-eq<sup>H-3</sup>), 10.0 Hz (ax<sup>H-2</sup>-ax<sup>H-3</sup>)

**H-3<sub>ax</sub>:** dd,  $J = 10.0$  Hz (ax<sup>H-3</sup>-ax<sup>H-2</sup>), 13.7 Hz (ax<sup>H-3</sup>-eq<sup>H-3</sup>)

**H-3<sub>eq</sub>:** dd,  $J = 3.3$  Hz (eq<sup>H-3</sup>-ax<sup>H-2</sup>), 13.7 Hz (eq<sup>H-3</sup>-ax<sup>H-3</sup>)

**H-5:** qd,  $J = 6.4$  Hz (ax<sup>H-5</sup>-H-6), 1.6 Hz (ax<sup>H-5</sup>-eq<sup>H-3</sup>)

---

### Compound S68- $\beta$

<sup>1</sup>H NMR H-H coupling constants

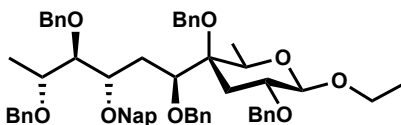

---

**H-1:** d,  $J = 7.7$  Hz (ax<sup>H-1</sup>-ax<sup>H-2</sup>)

**H-2:** ddd,  $J = 7.9$  Hz (ax<sup>H-2</sup>-ax<sup>H-1</sup>), 6.3 Hz (ax<sup>H-2</sup>-eq<sup>H-3</sup>), 11.5 Hz (ax<sup>H-2</sup>-ax<sup>H-3</sup>)

**H-3<sub>ax</sub>:** dd,  $J = 11.7$  Hz (ax<sup>H-3</sup>-ax<sup>H-2</sup>), 14.6 Hz (ax<sup>H-3</sup>-eq<sup>H-3</sup>)

**H-3<sub>eq</sub>:** dd,  $J = 5.6$  Hz (eq<sup>H-3</sup>-ax<sup>H-2</sup>), 14.6 Hz (eq<sup>H-3</sup>-ax<sup>H-3</sup>)

**H-5:** overlaps with other signals

---

### Compound S71- $\alpha$

<sup>1</sup>H NMR H-H coupling constants

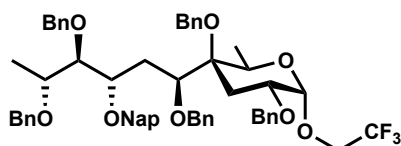

---

**H-1:** d,  $J = 3.4$  Hz (eq<sup>H-1</sup>-ax<sup>H-2</sup>)

**H-2:** ddd,  $J = 3.6$  Hz (ax<sup>H-2</sup>-eq<sup>H-1</sup>), 4.7 Hz (ax<sup>H-2</sup>-eq<sup>H-3</sup>), 12.2 Hz (ax<sup>H-2</sup>-ax<sup>H-3</sup>)

**H-3<sub>ax</sub>:** overlaps with H-8

**H-3<sub>eq</sub>:** dd,  $J = 3.3$  Hz (eq<sup>H-3</sup>-ax<sup>H-2</sup>), 13.7 Hz (eq<sup>H-3</sup>-ax<sup>H-3</sup>)

**H-5:** overlaps with H-9

---

## Compound S73

<sup>1</sup>H NMR H-H coupling constants

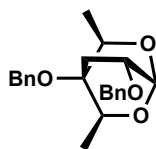

**H-1:** d,  $J = 2.1$  Hz (eq<sup>H-1</sup>-ax<sup>H-2</sup>)

**H-2:** ddd,  $J = 2.1$  Hz (ax<sup>H-2</sup>-eq<sup>H-1</sup>),  $3.3$  Hz (ax<sup>H-2</sup>-eq<sup>H-3</sup>),  $10.0$  Hz (ax<sup>H-2</sup>-ax<sup>H-3</sup>)

**H-3<sub>ax</sub>:** ddd,  $J = 10.0$  Hz (ax<sup>H-3</sup>-ax<sup>H-2</sup>),  $13.7$  Hz (ax<sup>H-3</sup>-eq<sup>H-3</sup>),  $2.1$  Hz (ax<sup>H-3</sup>-ax<sup>H-7</sup>)

**H-3<sub>eq</sub>:** ddd,  $J = 3.3$  Hz (eq<sup>H-3</sup>-ax<sup>H-2</sup>),  $13.7$  Hz (eq<sup>H-3</sup>-ax<sup>H-3</sup>),  $1.7$  Hz (eq<sup>H-3</sup>-ax<sup>H-5</sup>)

**H-5:** qd,  $J = 6.4$  Hz (ax<sup>H-5</sup>-H-6),  $1.6$  Hz (ax<sup>H-5</sup>-eq<sup>H-3</sup>)

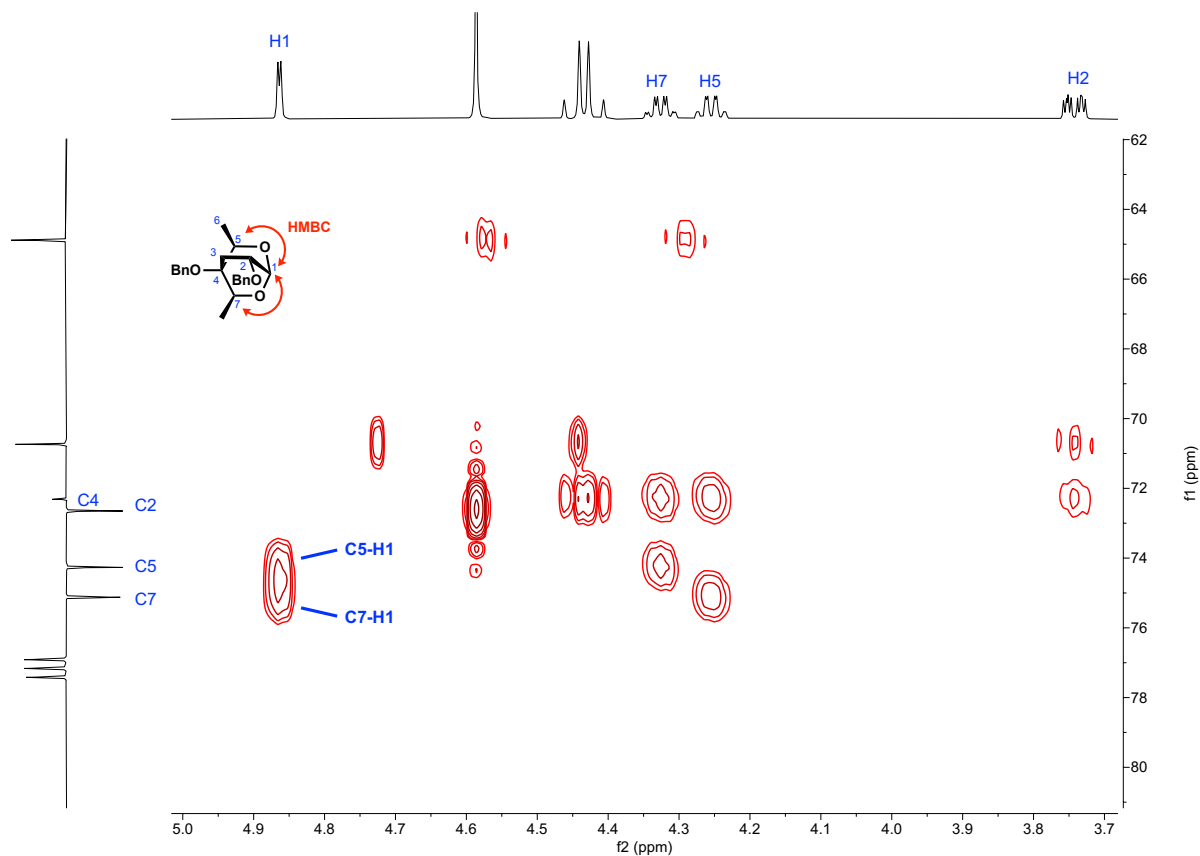

**Figure S17.** HMBC spectrum of compound **S73**. The key long-range heteronuclear correlation for **S73** can be found between C5-H1 and C7-H1.

## Compound S80

<sup>1</sup>H NMR H-H coupling constants

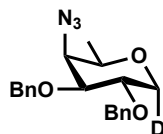

---

**H-1:** d,  $J = 5.6$  Hz (eq<sup>H-1</sup>-ax<sup>H-2</sup>)

**H-2:** dd,  $J = 5.6$  Hz (ax<sup>H-2</sup>-eq<sup>H-1</sup>), 9.0 Hz (ax<sup>H-2</sup>-ax<sup>H-3</sup>)

**H-3:** dd,  $J = 9.0$  Hz (ax<sup>H-3</sup>-ax<sup>H-2</sup>), 3.7 Hz (ax<sup>H-3</sup>-eq<sup>H-4</sup>)

**H-4:** dd,  $J = 3.7$  Hz (eq<sup>H-4</sup>-ax<sup>H-3</sup>), 1.3 Hz (eq<sup>H-4</sup>-ax<sup>H-5</sup>)

**H-5:** qd,  $J = 1.3$  Hz (ax<sup>H-5</sup>-eq<sup>H-4</sup>), 6.3 Hz (ax<sup>H-5</sup>-H-6)

---

## Compound S75- $\alpha$

<sup>1</sup>H NMR H-H coupling constants

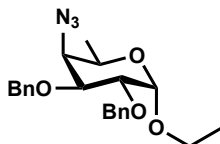

---

**H-1:** d,  $J = 3.8$  Hz (eq<sup>H-1</sup>-ax<sup>H-2</sup>)

**H-2:** dd,  $J = 3.8$  Hz (ax<sup>H-2</sup>-eq<sup>H-1</sup>), 9.9 Hz (ax<sup>H-2</sup>-ax<sup>H-3</sup>)

**H-3:** dd,  $J = 9.9$  Hz (ax<sup>H-3</sup>-ax<sup>H-2</sup>), 3.7 Hz (ax<sup>H-3</sup>-eq<sup>H-4</sup>)

**H-4:** dd,  $J = 3.8$  Hz (eq<sup>H-4</sup>-ax<sup>H-3</sup>), 1.5 Hz (eq<sup>H-4</sup>-ax<sup>H-5</sup>)

**H-5:** overlaps with other signals

---

## Compound S75- $\beta$

<sup>1</sup>H NMR H-H coupling constants

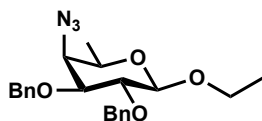

---

**H-1:** d,  $J = 7.3$  Hz (eq<sup>H-1</sup>-ax<sup>H-2</sup>)

**H-2:** dd,  $J = 7.1$  Hz (ax<sup>H-2</sup>-eq<sup>H-1</sup>), 9.5 Hz (ax<sup>H-2</sup>-ax<sup>H-3</sup>)

**H-3:** overlaps with H-4

**H-4:** overlaps with H-3

**H-5:** overlaps with other signals

---

# NMR spectra of new and selected compounds

$^1\text{H}$  NMR, 400 MHz,  $\text{CDCl}_3$  of 7

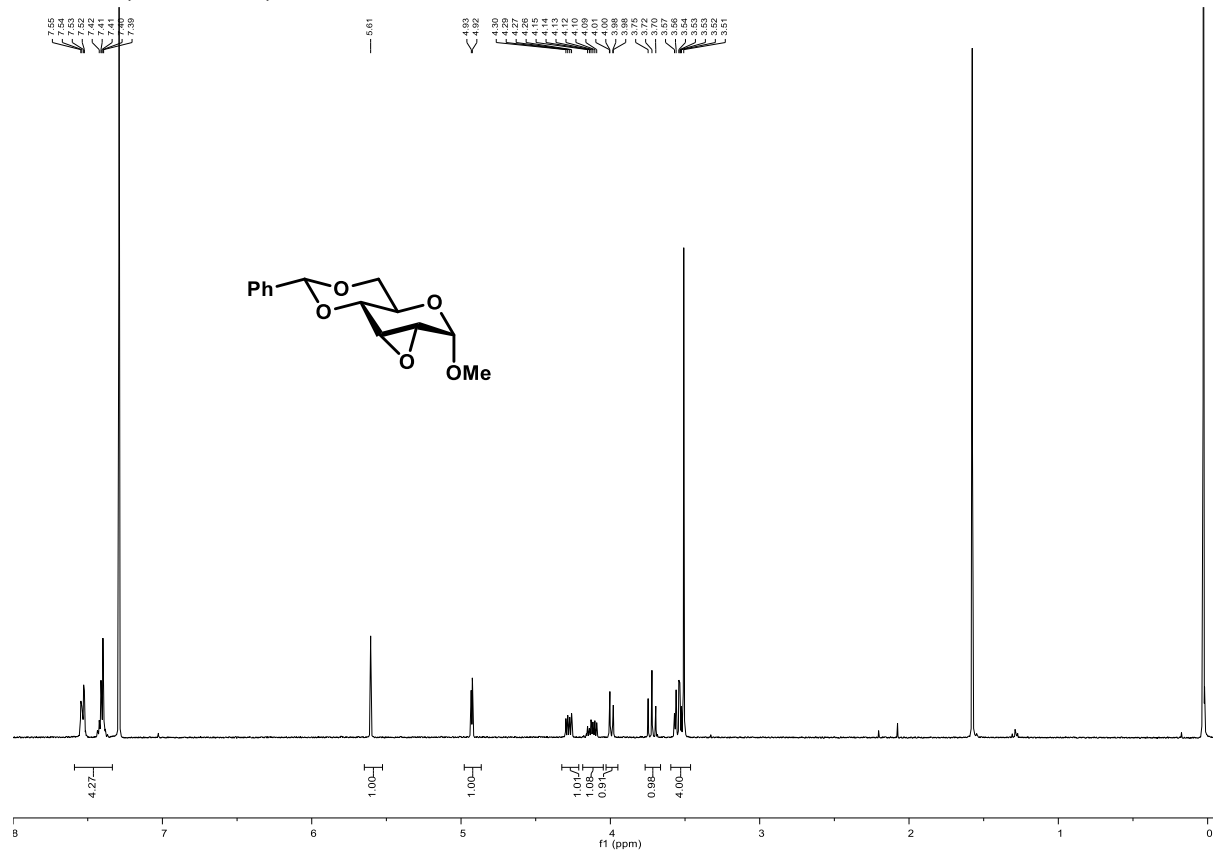

$^{13}\text{C}$  NMR, 101 MHz,  $\text{CDCl}_3$  of 7

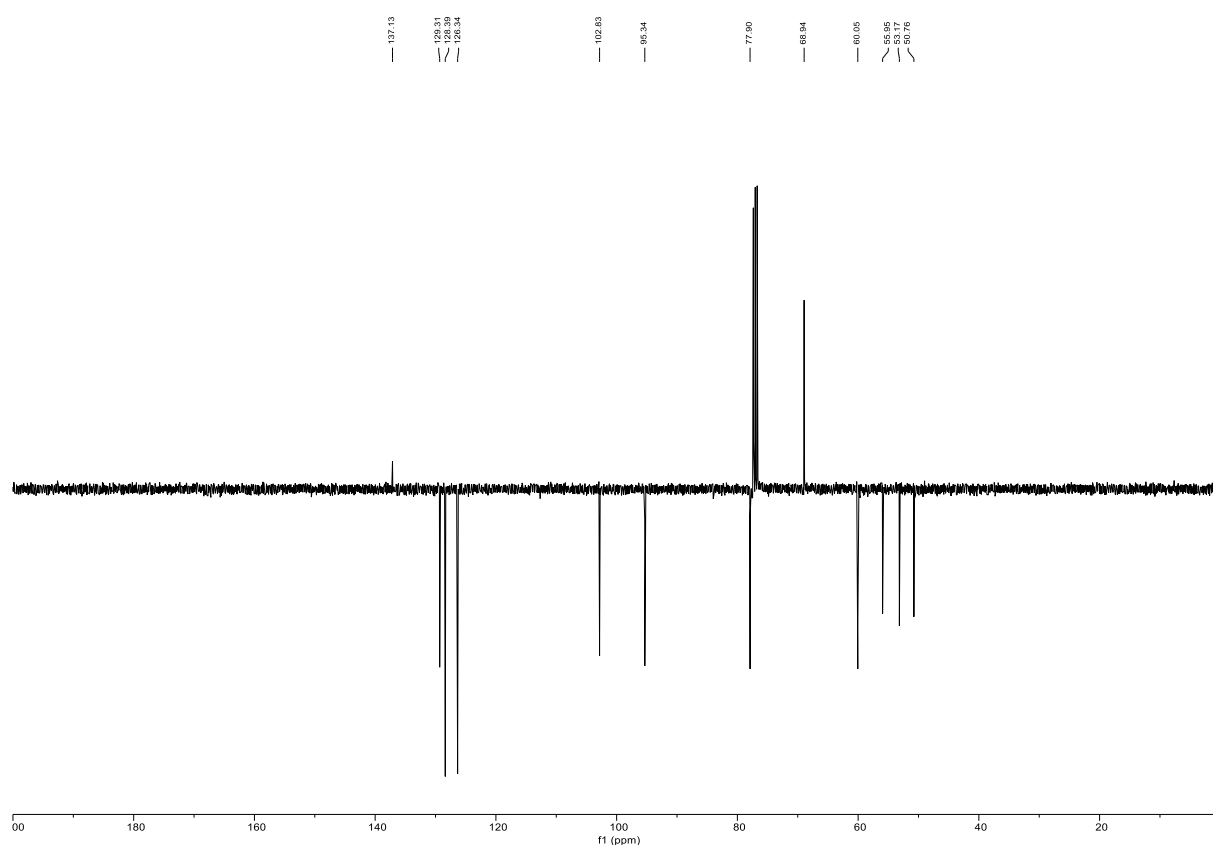

HH-COSY NMR, CDCl<sub>3</sub> of 7

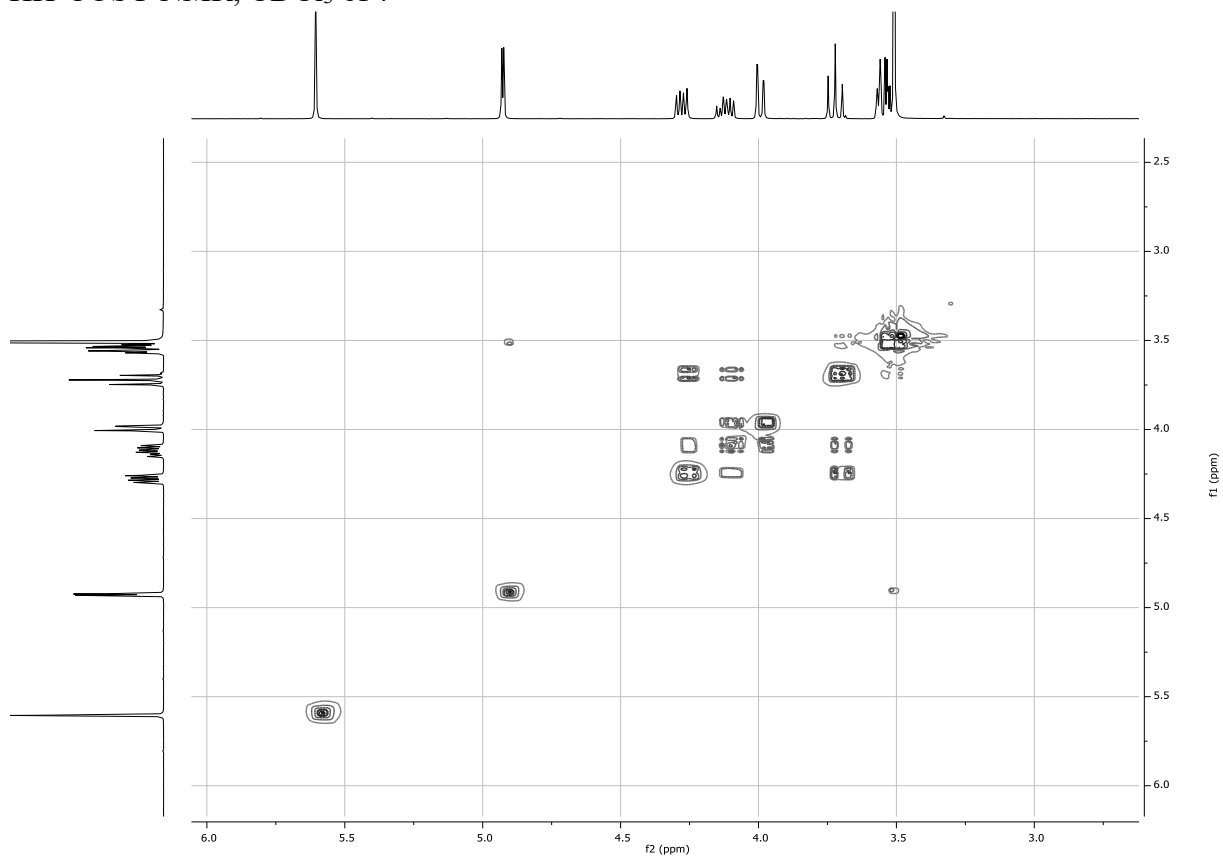

HSQC NMR, CDCl<sub>3</sub> of 7

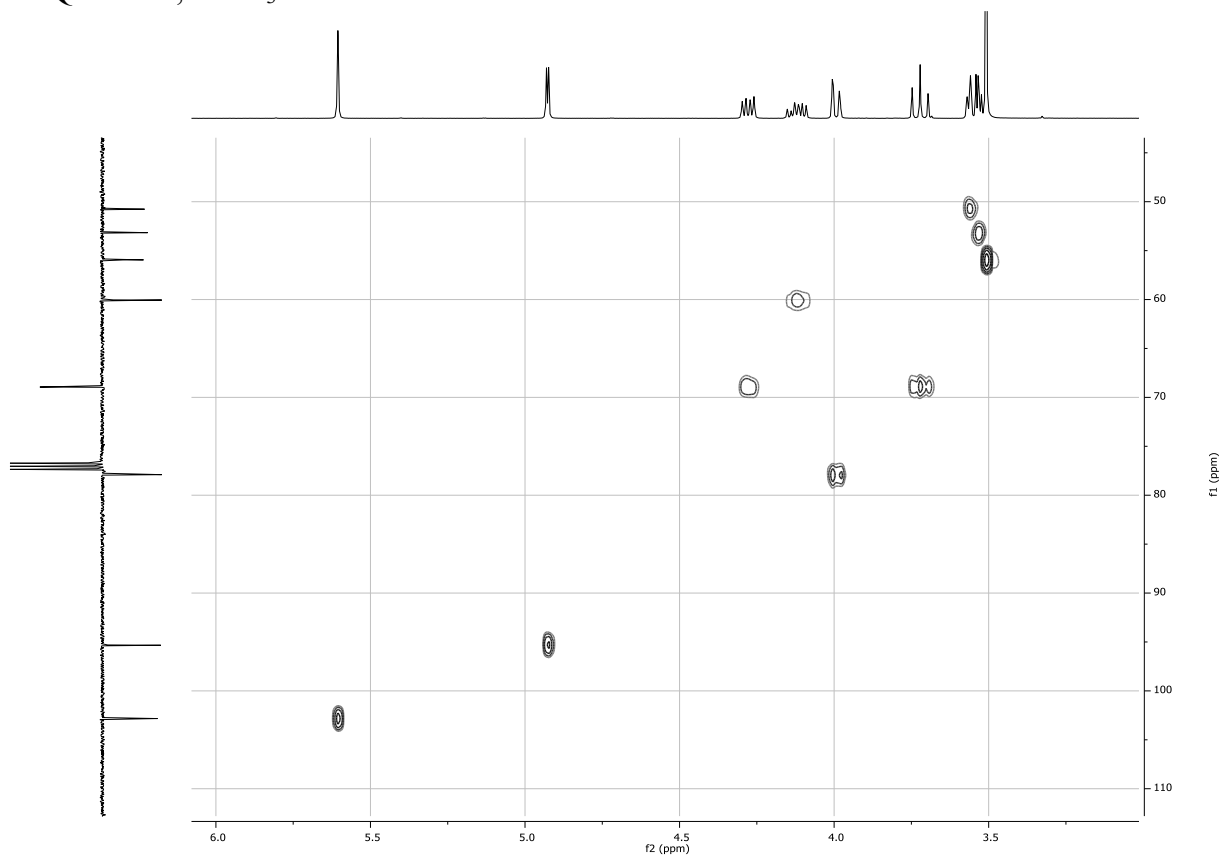

$^1\text{H}$  NMR, 400 MHz,  $\text{CDCl}_3$  of **8**

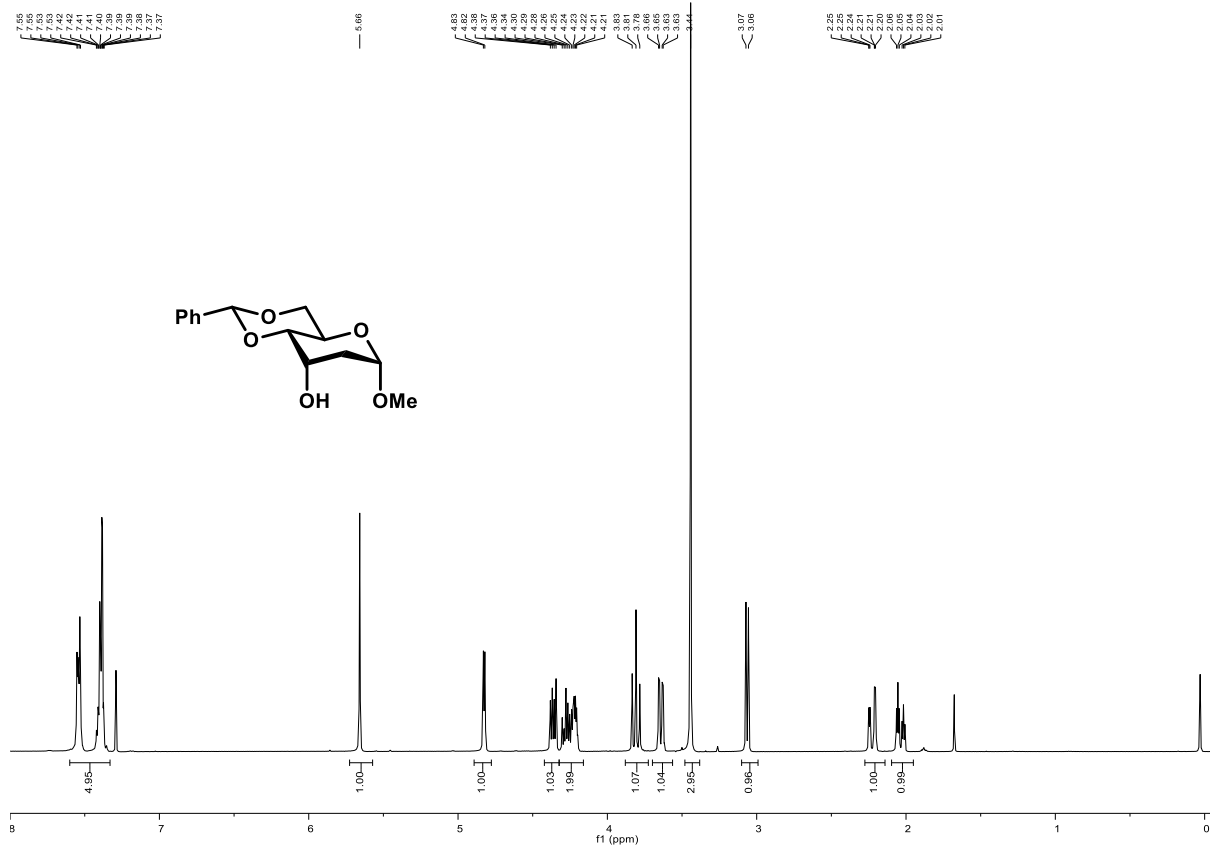

$^{13}\text{C}$  NMR, 101 MHz,  $\text{CDCl}_3$  of **8**

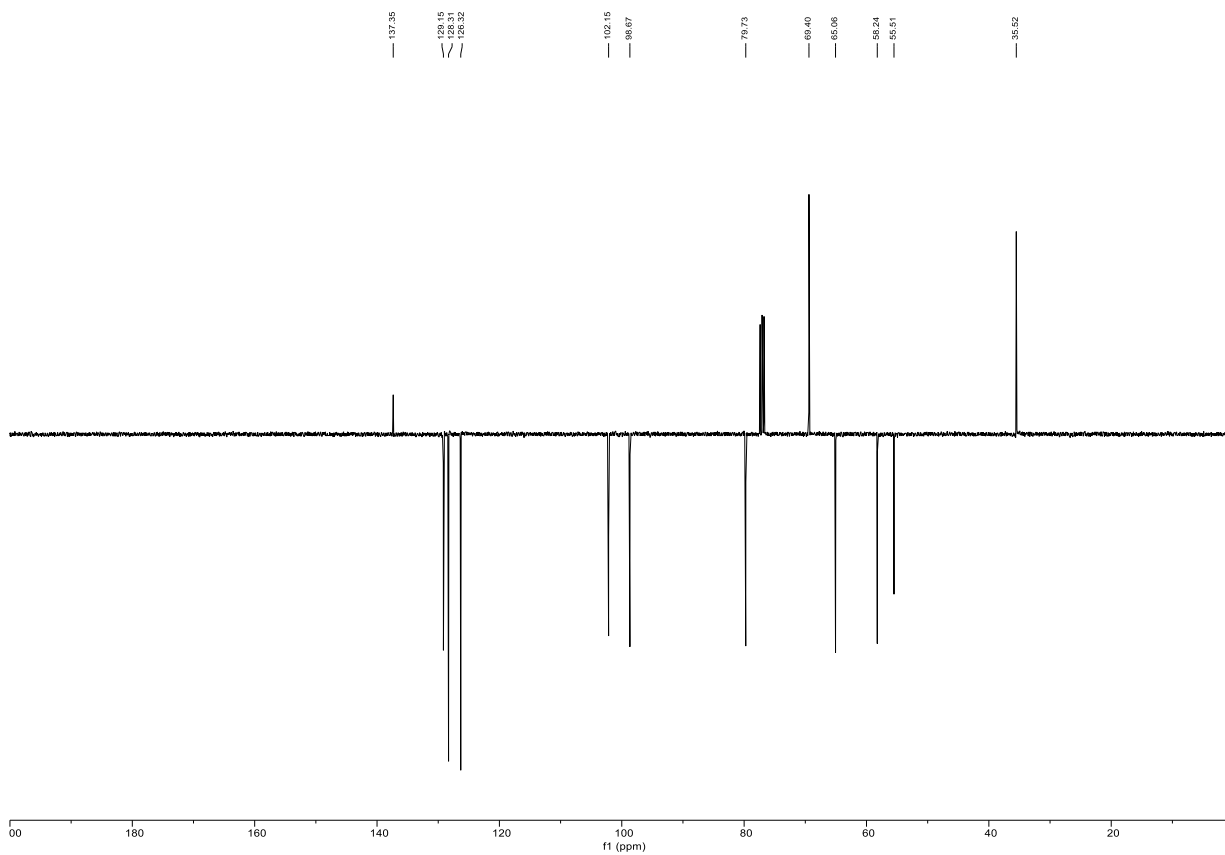



HH-COSY NMR, CDCl<sub>3</sub> of **8**

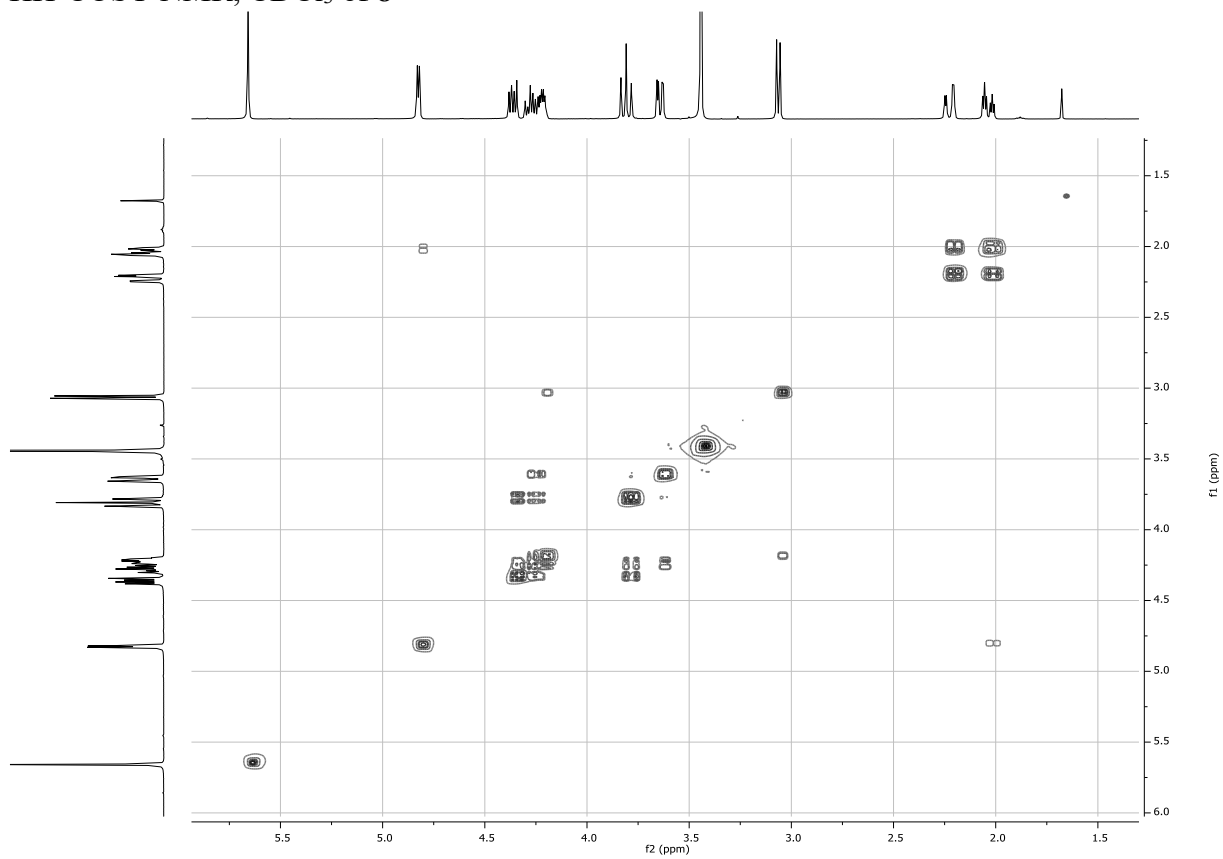

HSQC NMR, CDCl<sub>3</sub> of **8**

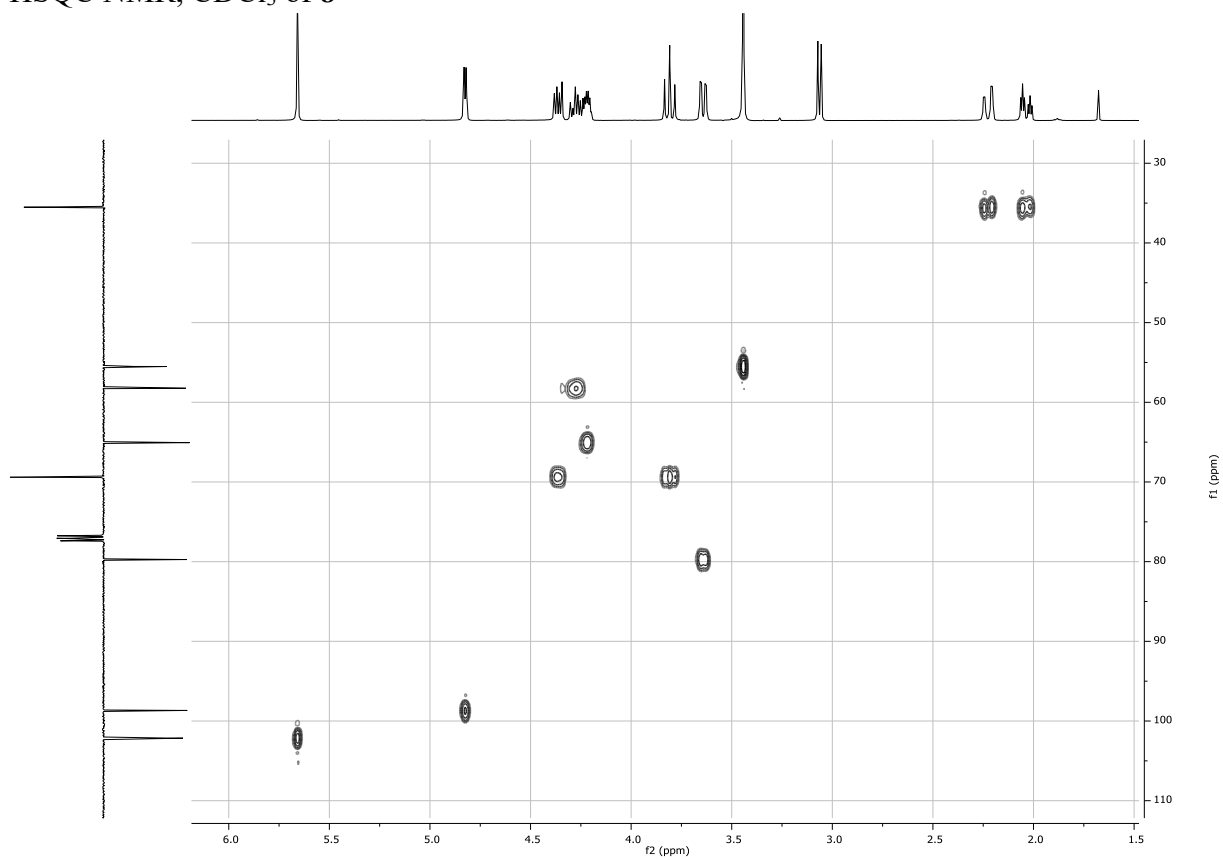

<sup>1</sup>H NMR, 400 MHz, CDCl<sub>3</sub> of **9**

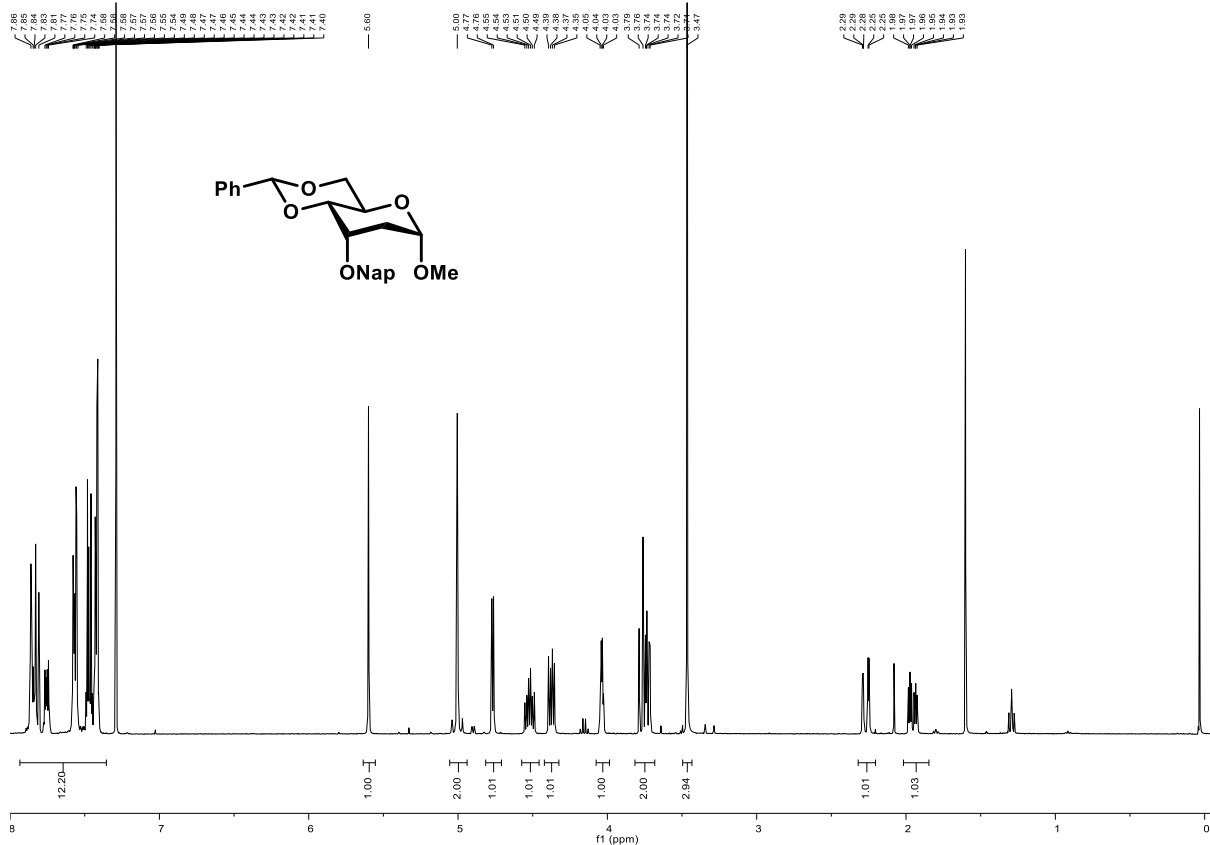

<sup>13</sup>C NMR, 101 MHz, CDCl<sub>3</sub> of **9**

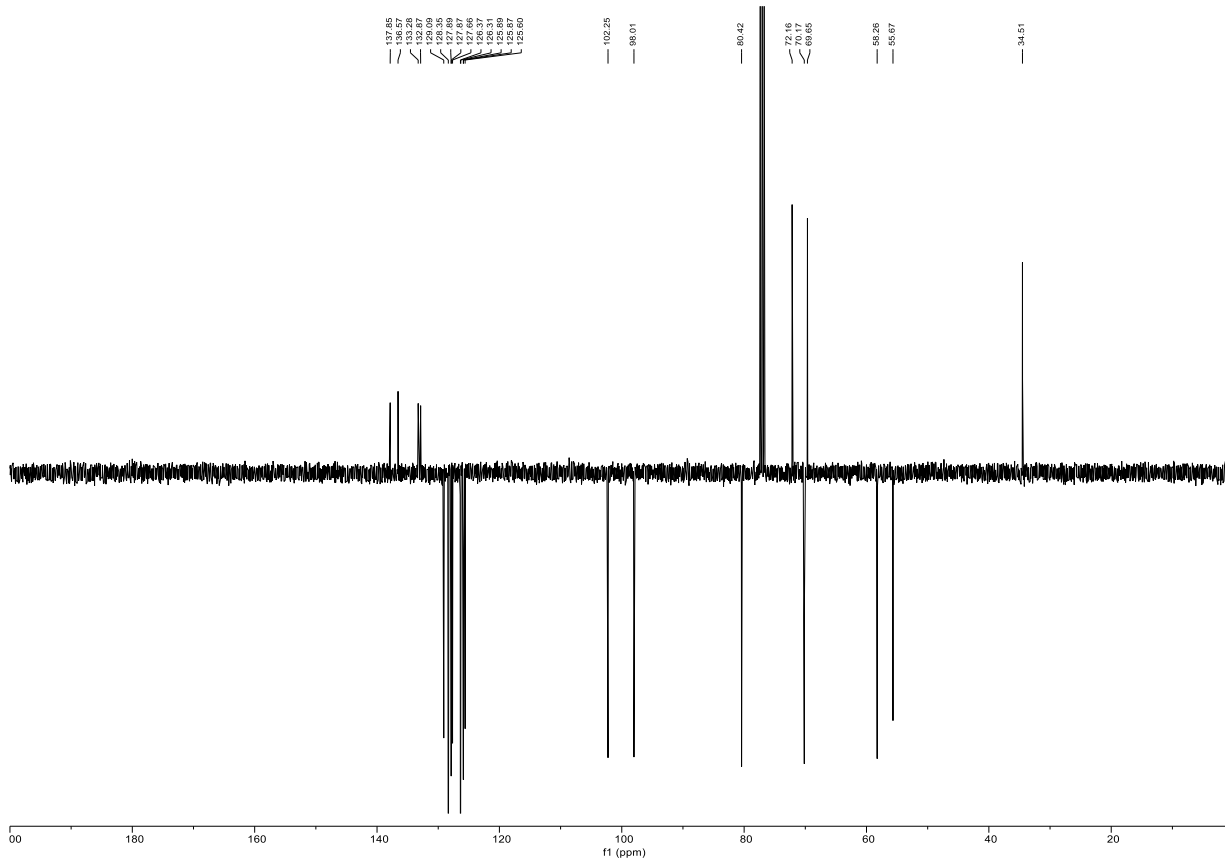

HH-COSY NMR, CDCl<sub>3</sub> of **9**

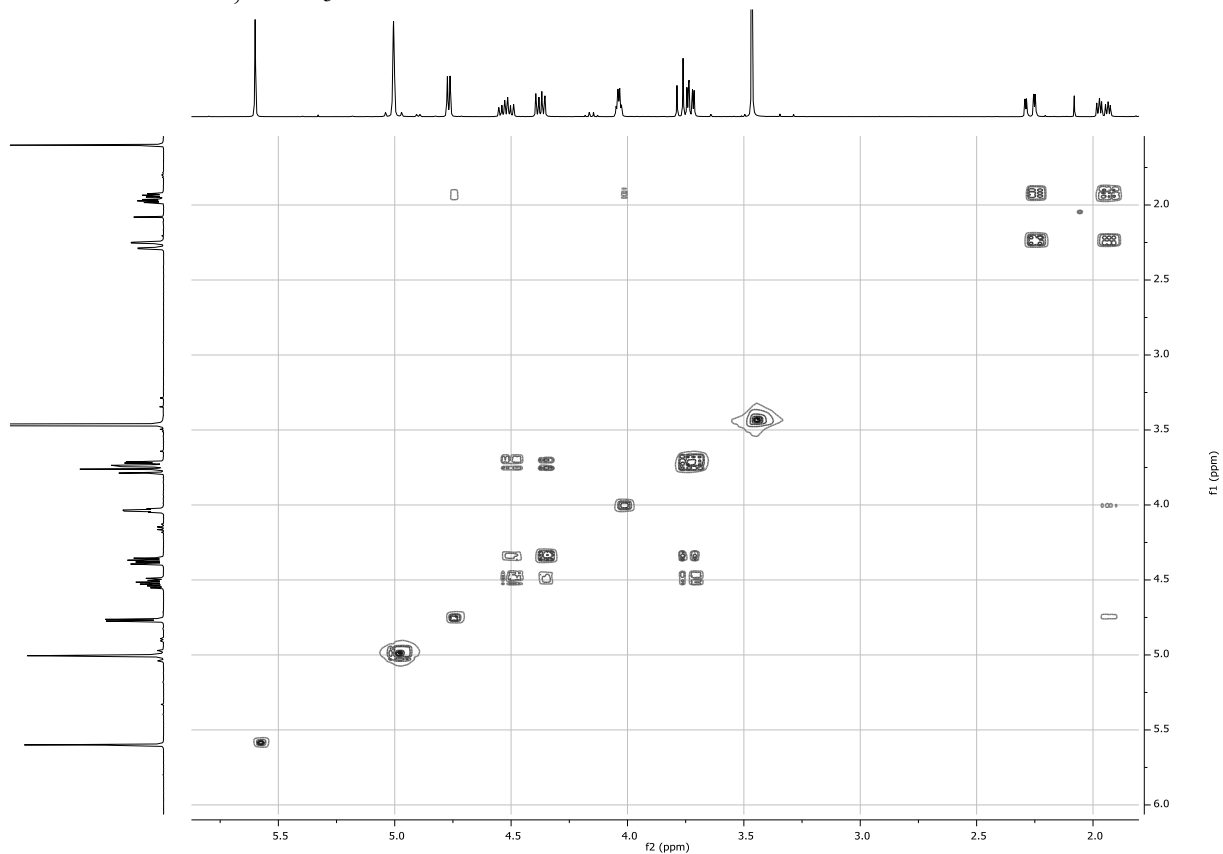

HSQC NMR, CDCl<sub>3</sub> of **9**

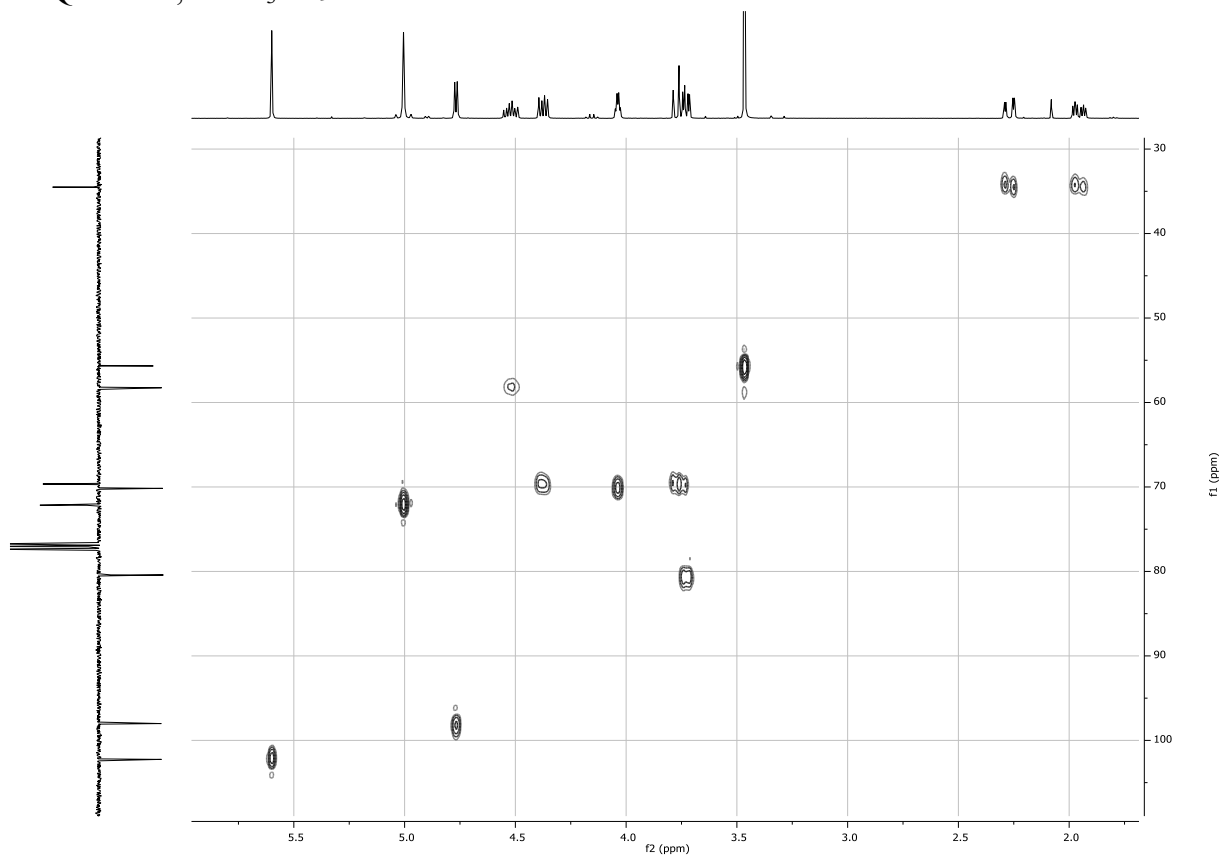



HH-COSY NMR, CDCl<sub>3</sub> of **10**

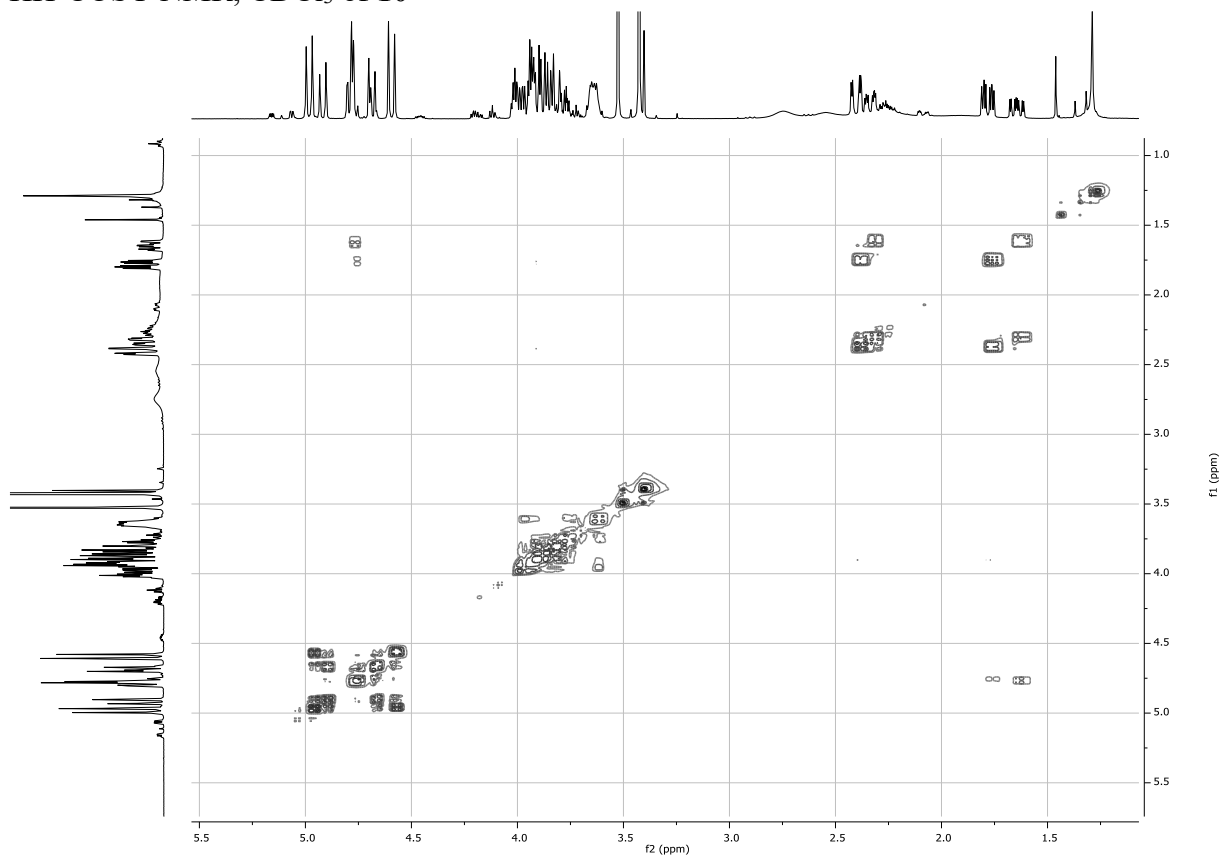

HSQC NMR, CDCl<sub>3</sub> of **10**

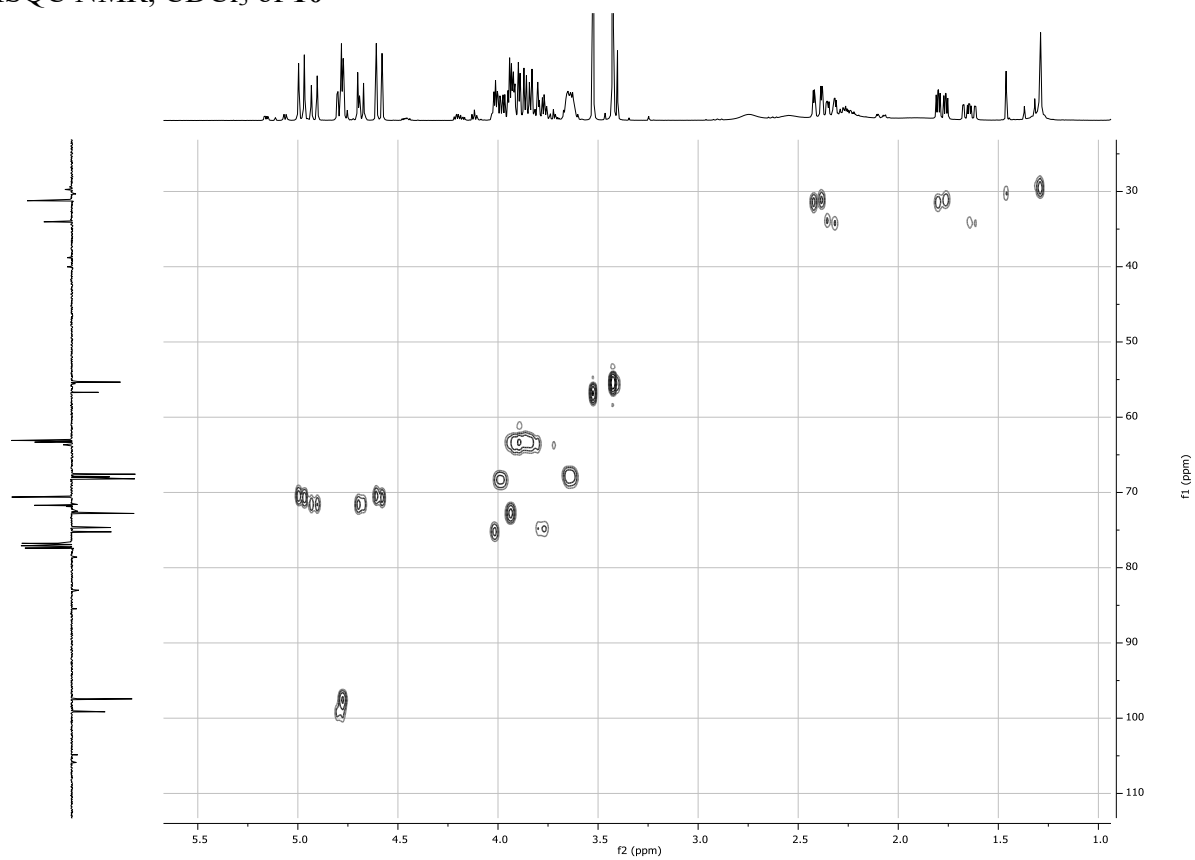

<sup>1</sup>H NMR, 400 MHz, CDCl<sub>3</sub> of **11**

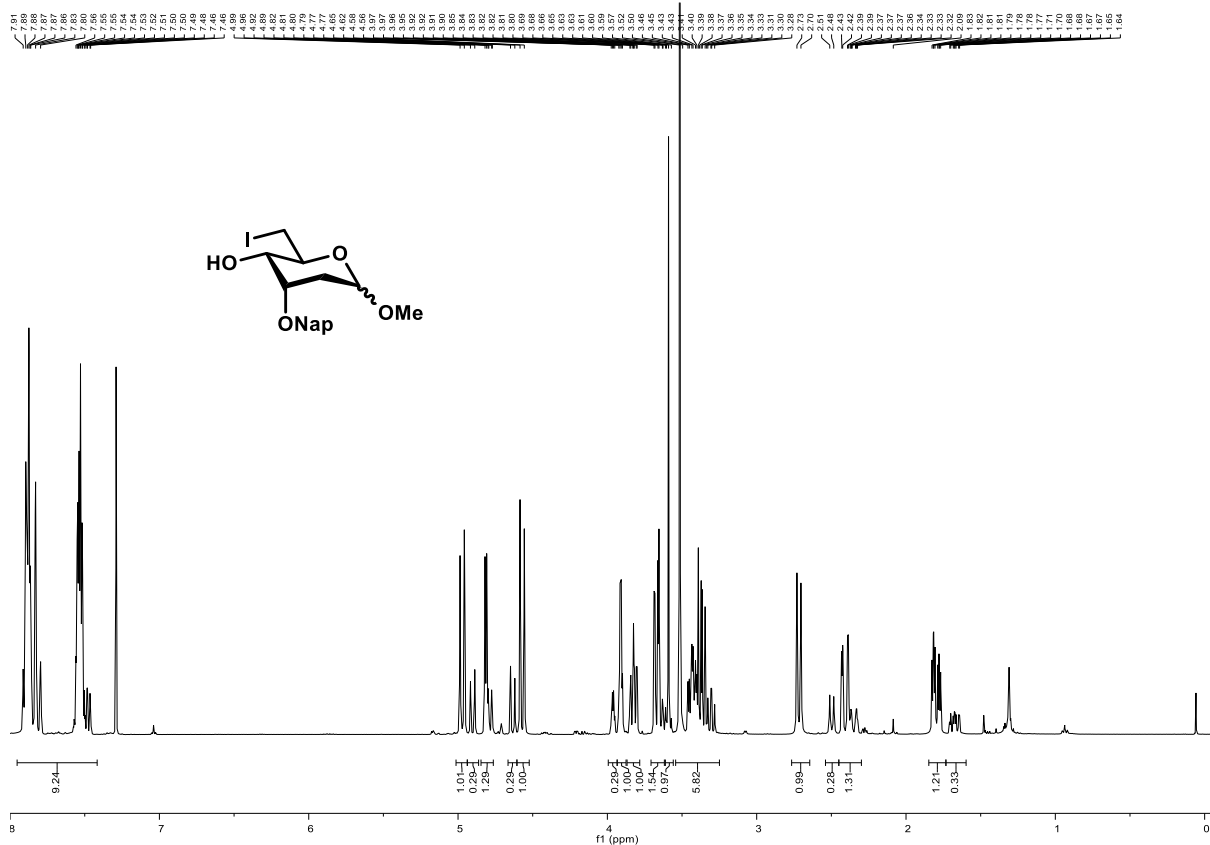

<sup>13</sup>C NMR, 101 MHz, CDCl<sub>3</sub> of **11**

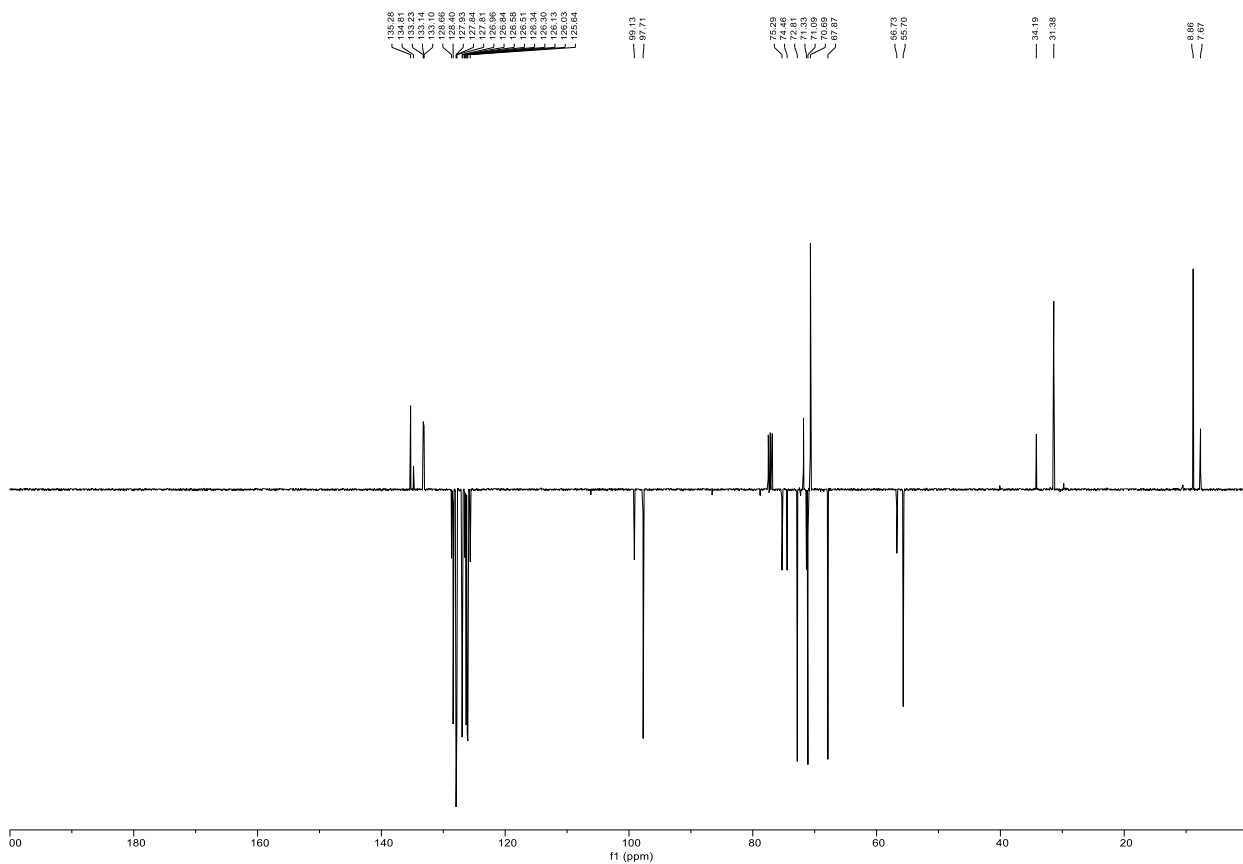

HH-COSY NMR, CDCl<sub>3</sub> of **11**

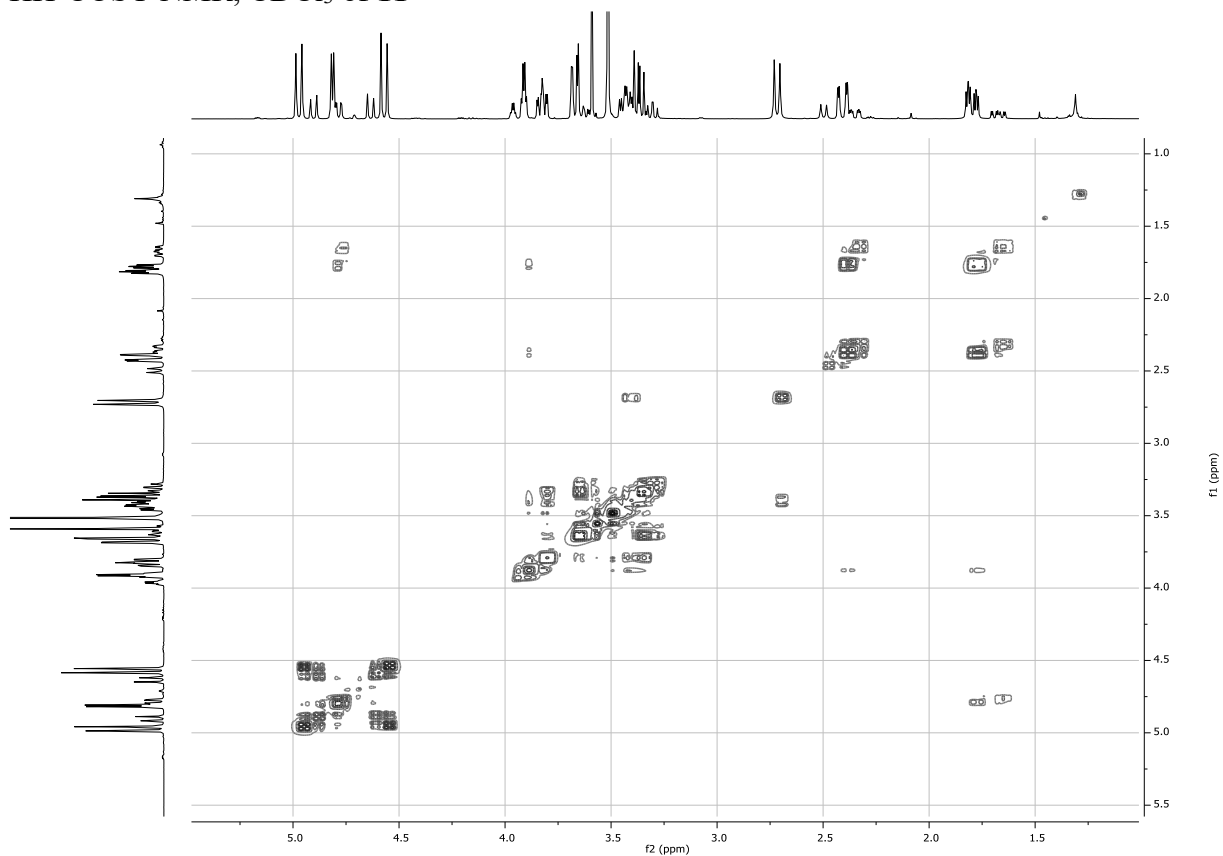

HSQC NMR, CDCl<sub>3</sub> of **11**

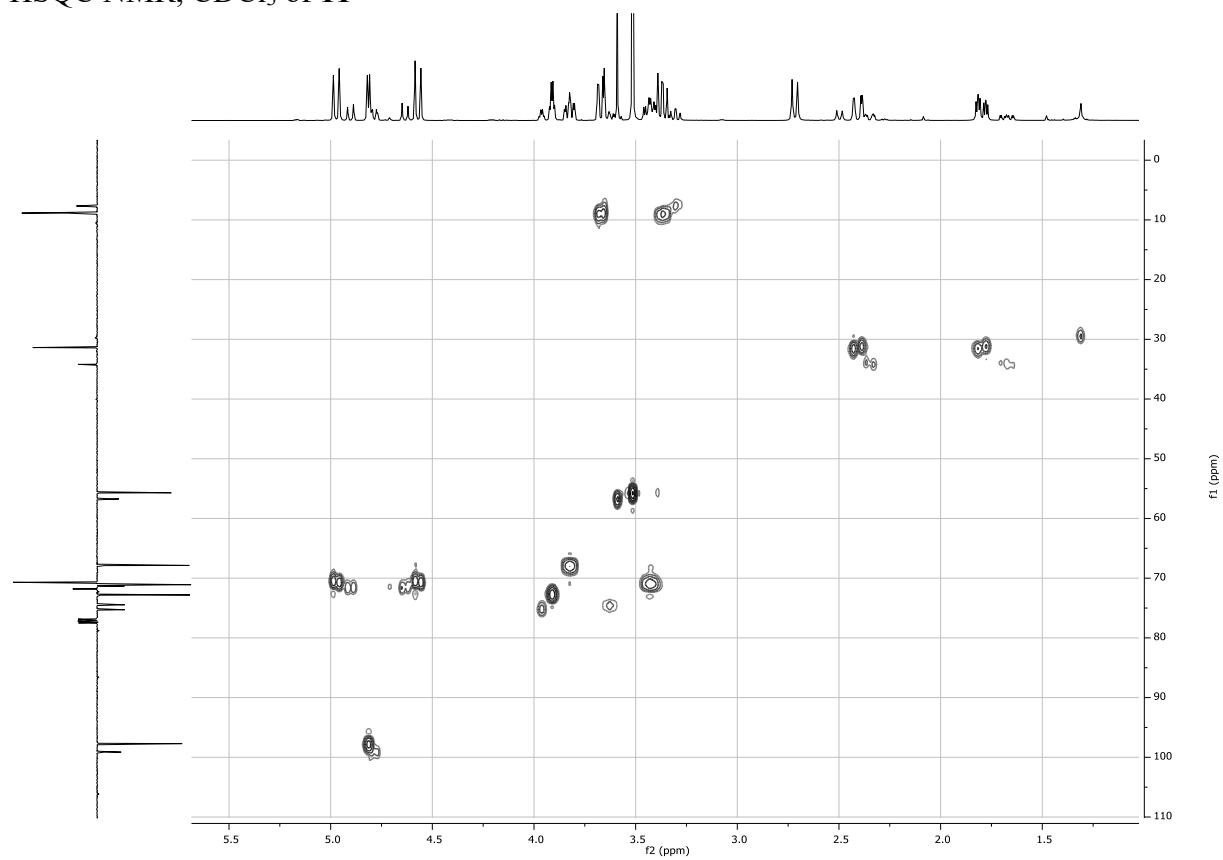

<sup>1</sup>H NMR, 400 MHz, CDCl<sub>3</sub> of **12**

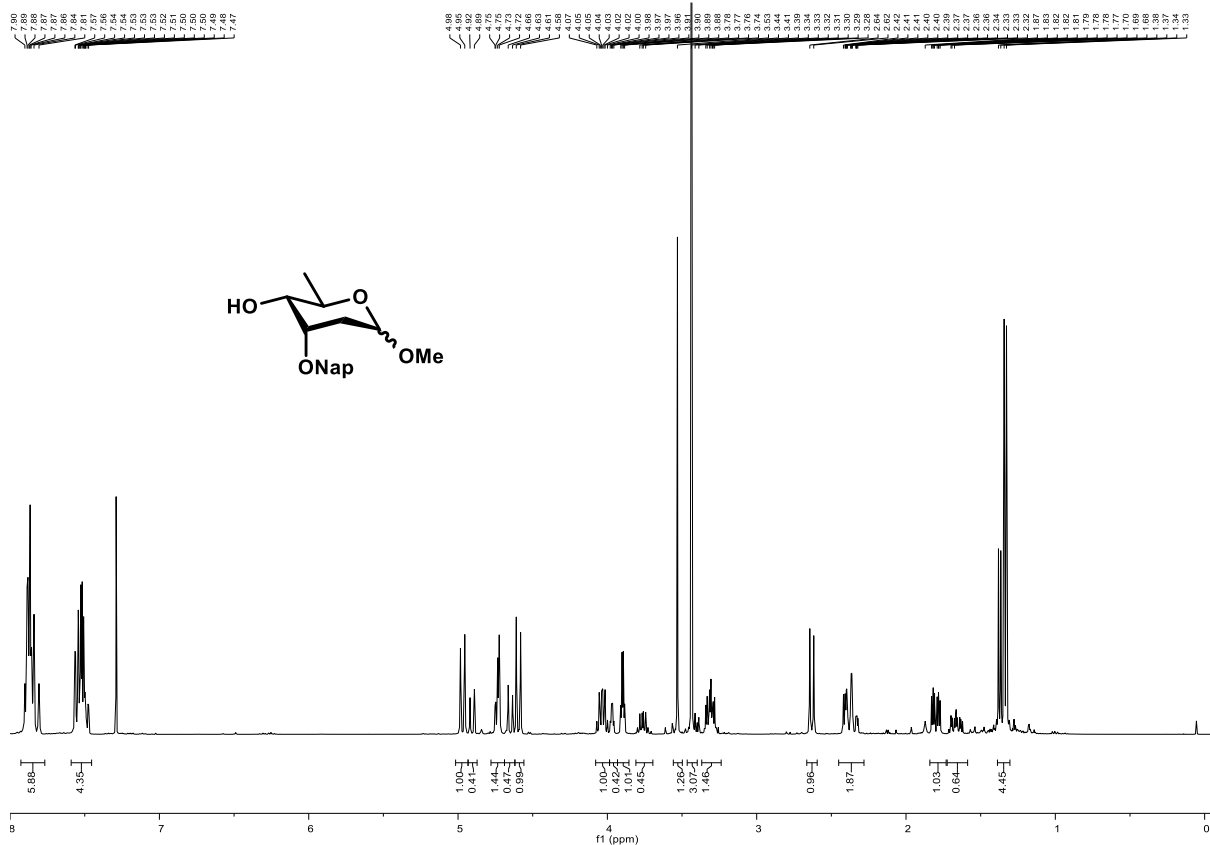

<sup>13</sup>C NMR, 101 MHz, CDCl<sub>3</sub> of **12**

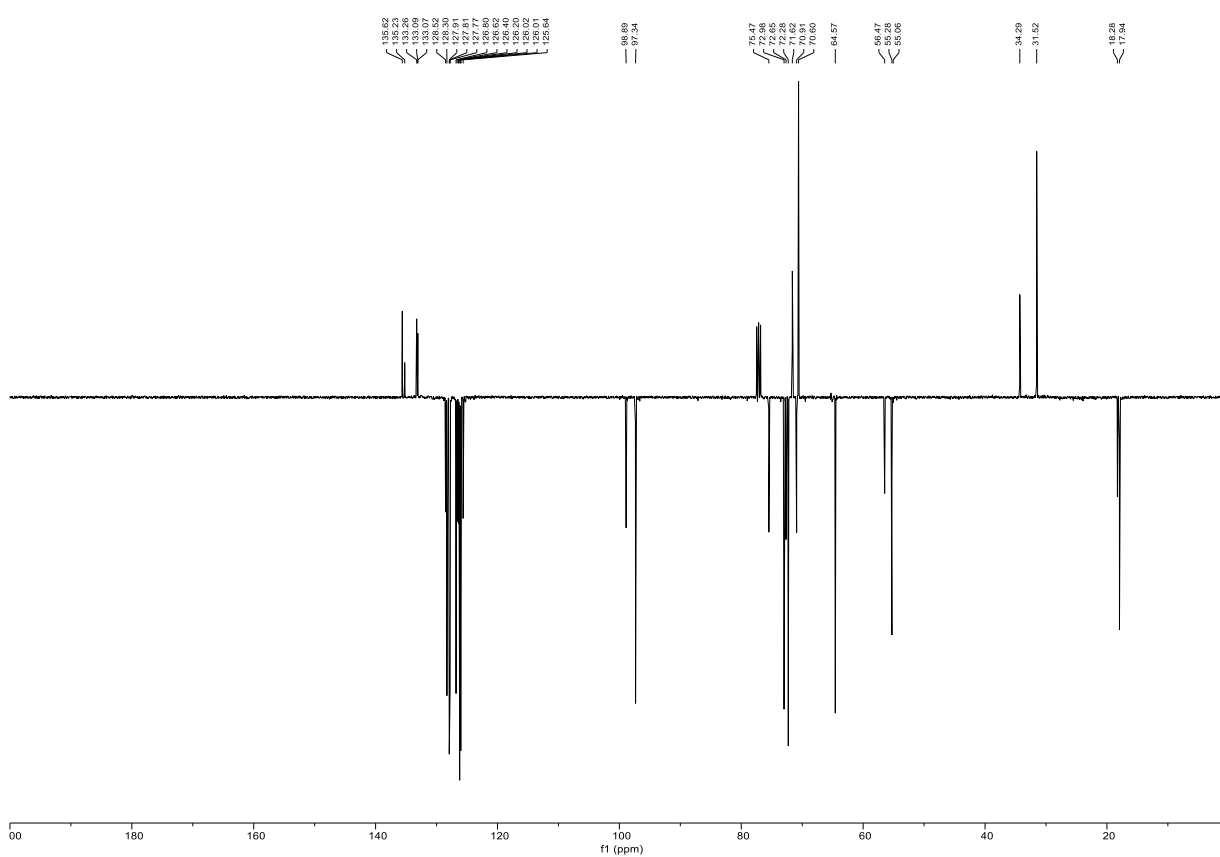



HH-COSY NMR, CDCl<sub>3</sub> of **12**

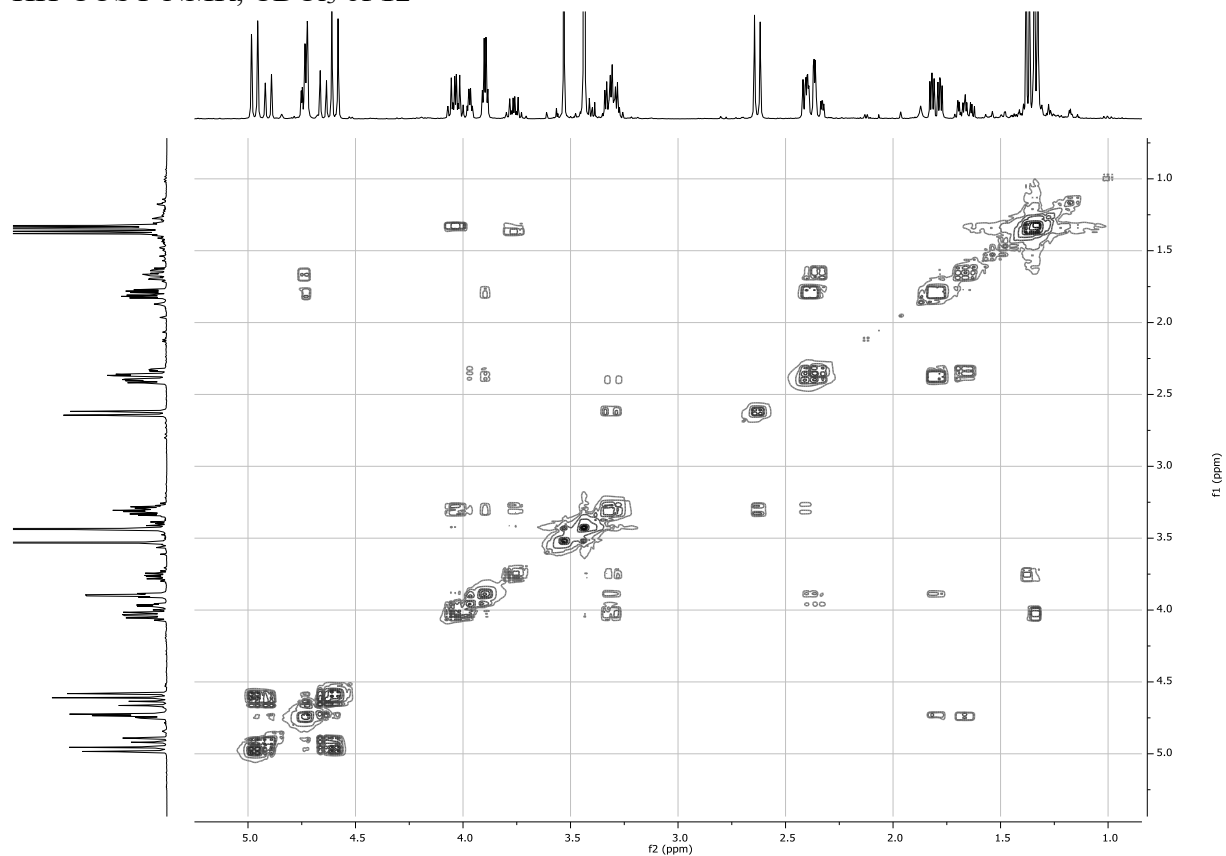

HSQC NMR, CDCl<sub>3</sub> of **12**

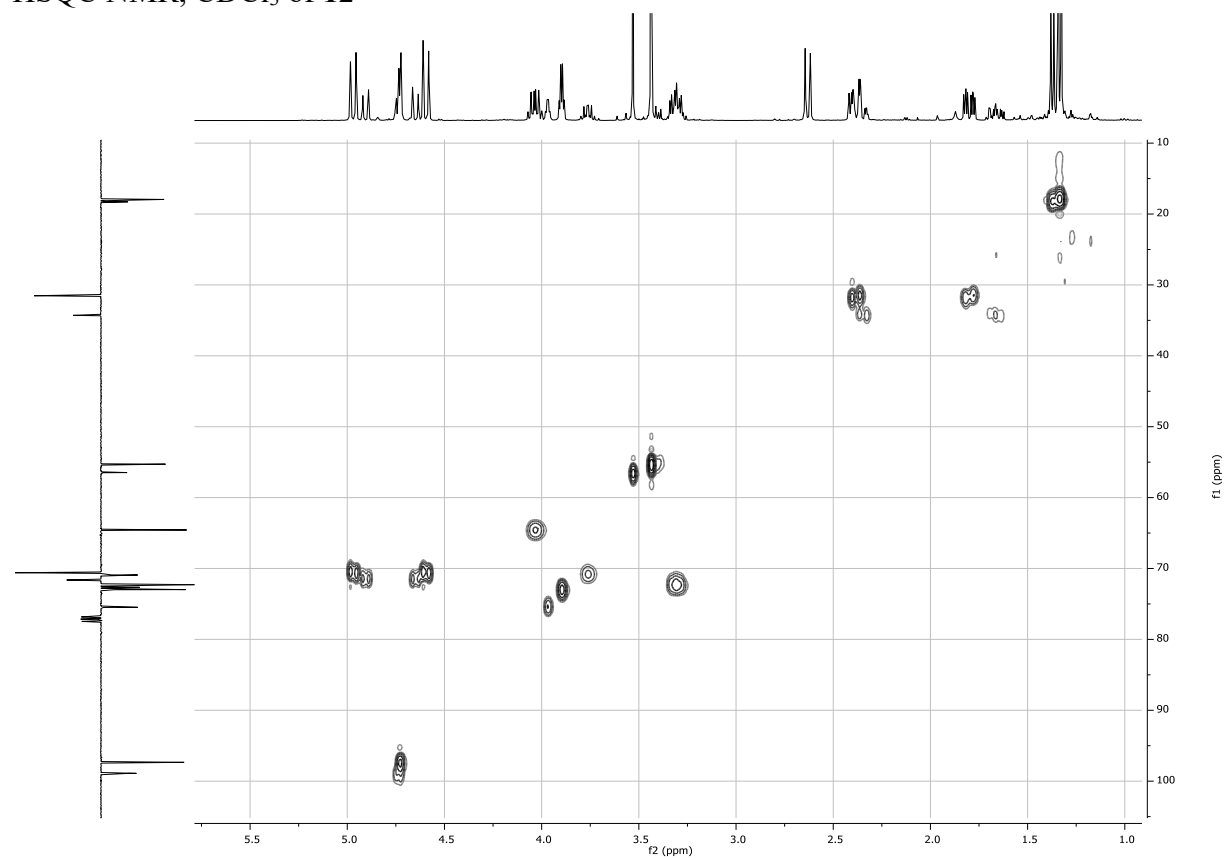

<sup>1</sup>H NMR, 400 MHz, CDCl<sub>3</sub> of **13**

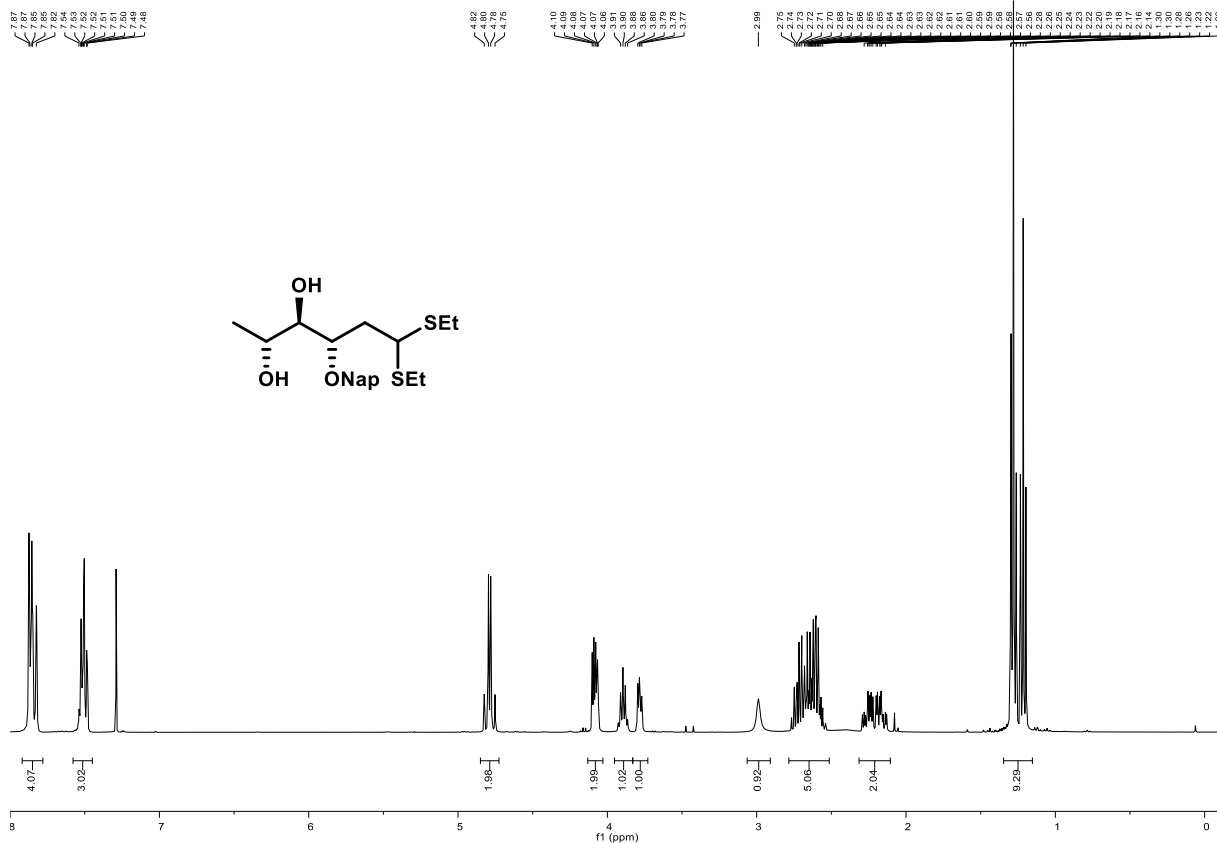

<sup>13</sup>C NMR, 101 MHz, CDCl<sub>3</sub> of **13**

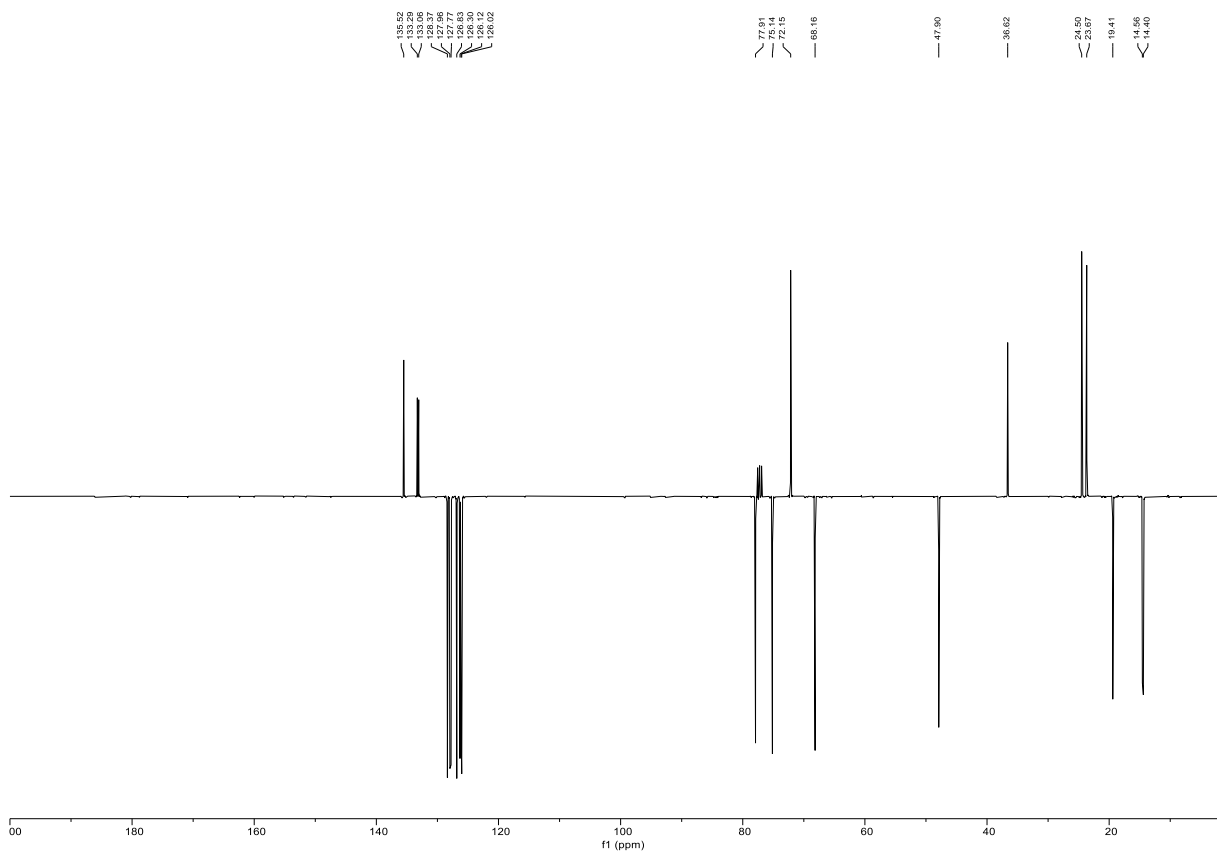

HH-COSY NMR, CDCl<sub>3</sub> of **13**

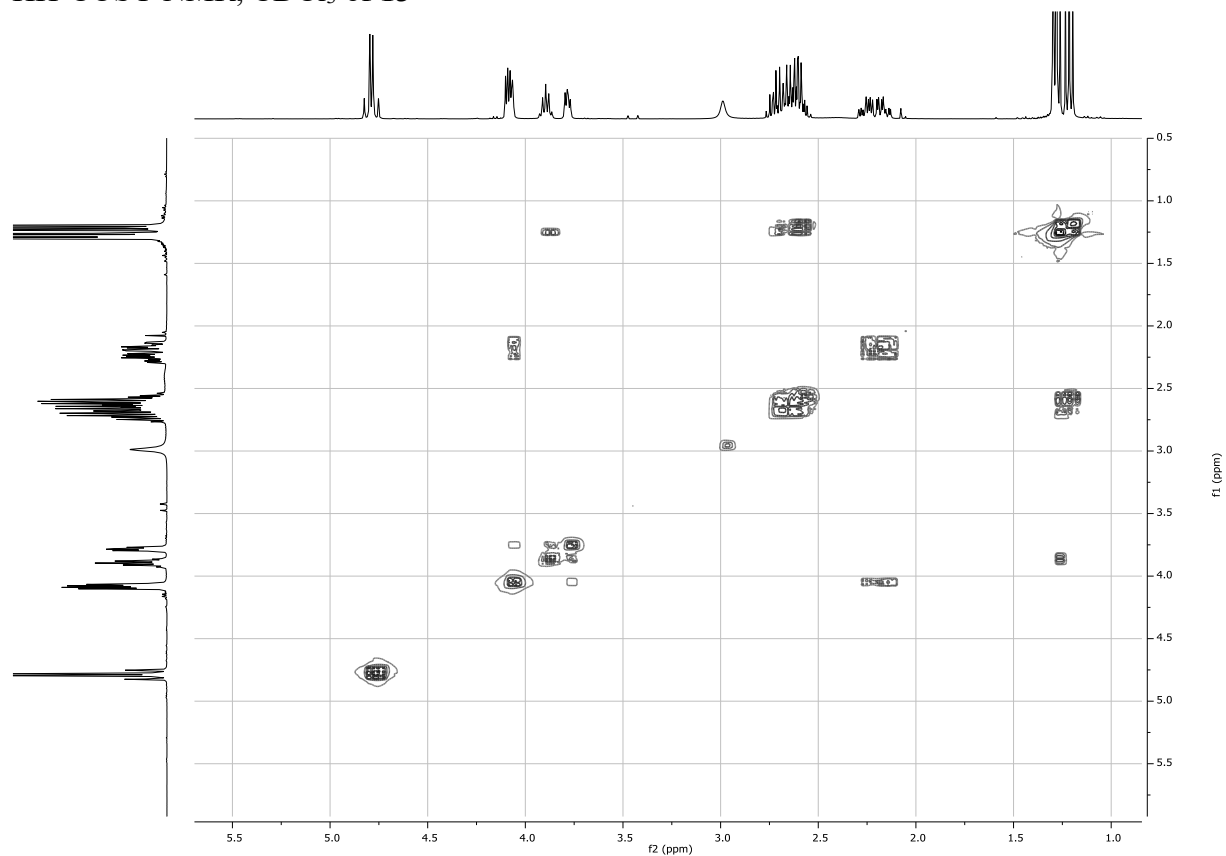

HSQC NMR, CDCl<sub>3</sub> of **13**

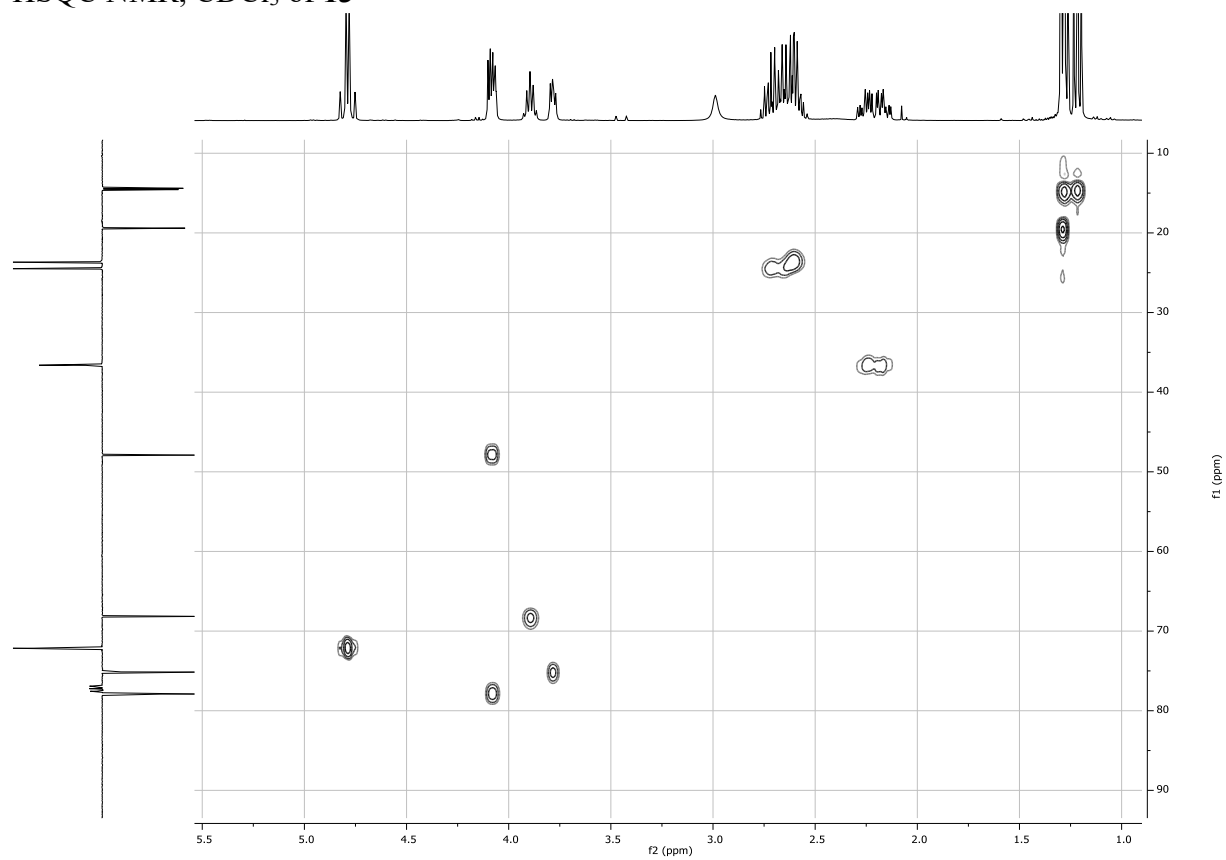

<sup>1</sup>H NMR, 400 MHz, CDCl<sub>3</sub> of **14**

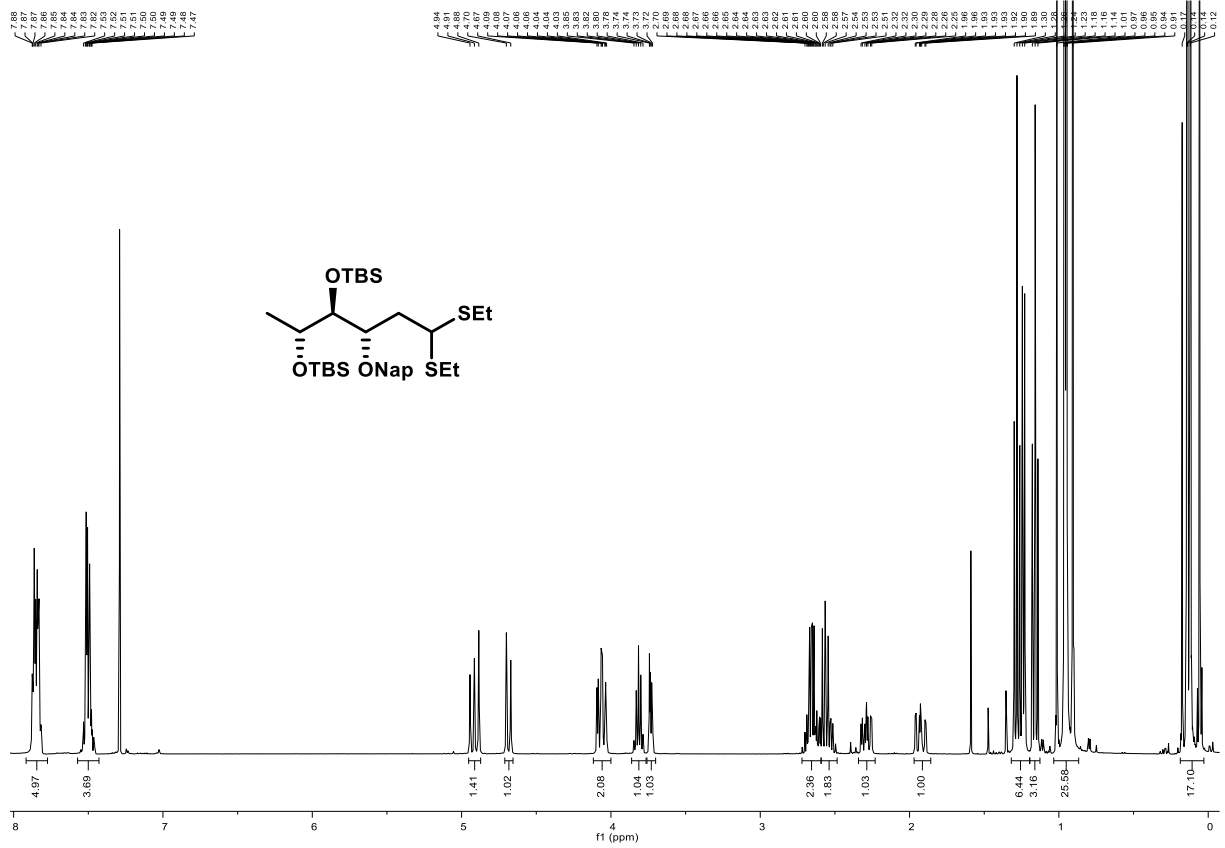

<sup>13</sup>C NMR, 101 MHz, CDCl<sub>3</sub> of **14**

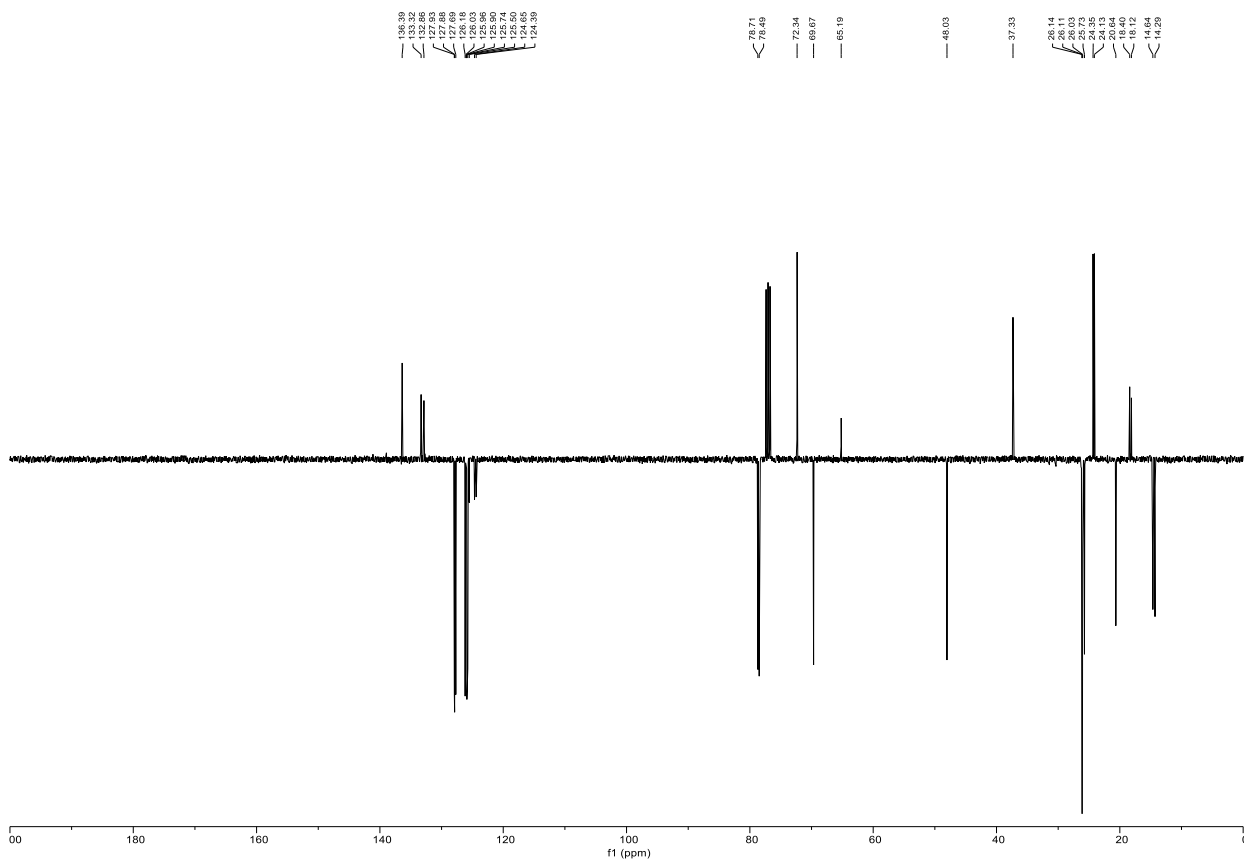

HH-COSY NMR, CDCl<sub>3</sub> of **14**

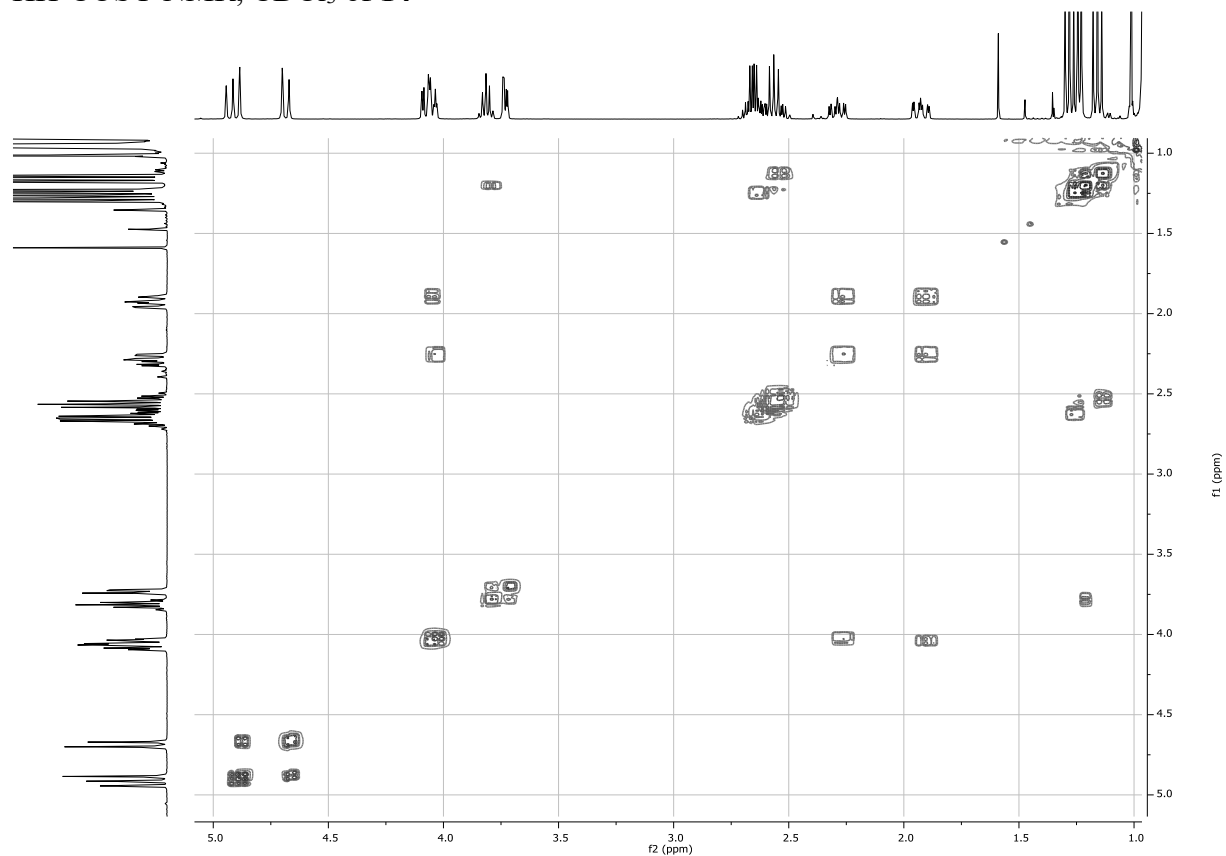

HSQC NMR, CDCl<sub>3</sub> of **14**

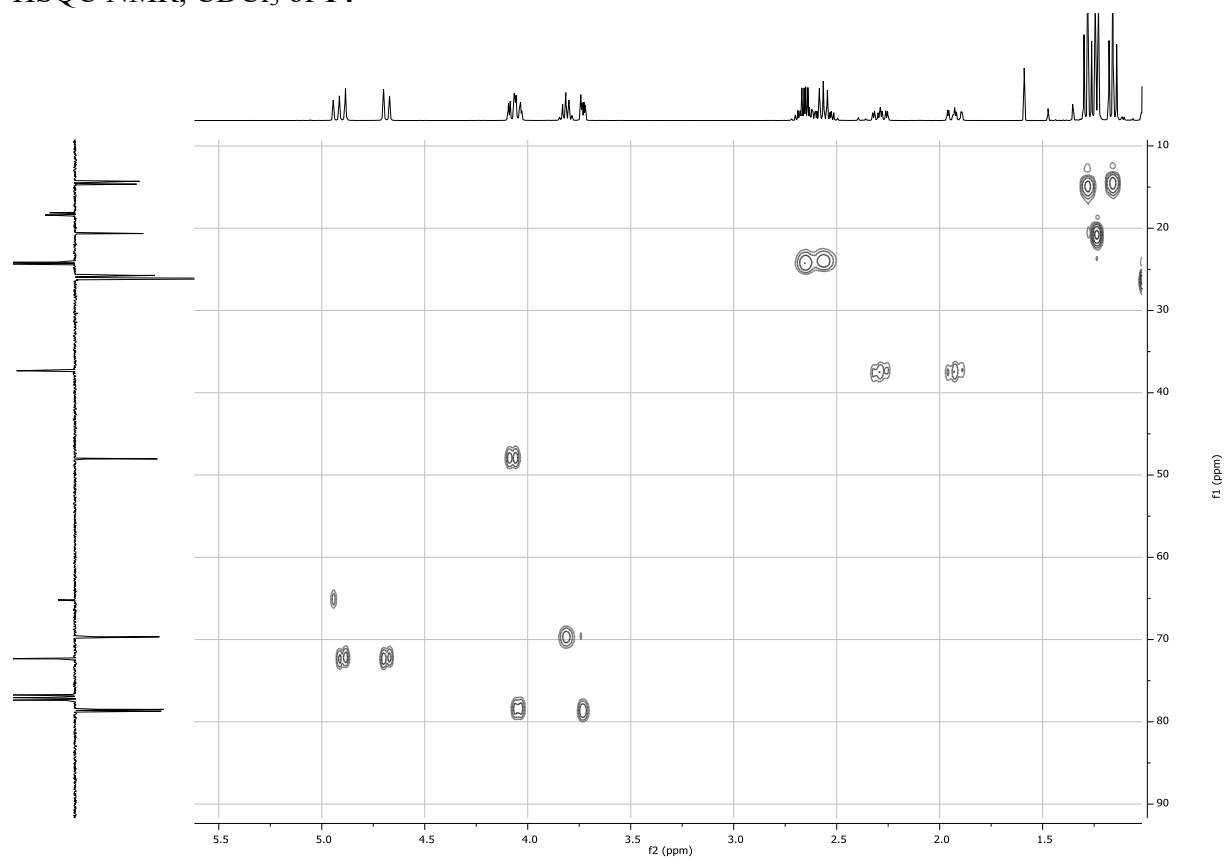

$^1\text{H}$  NMR, 400 MHz,  $\text{CDCl}_3$  of **15**

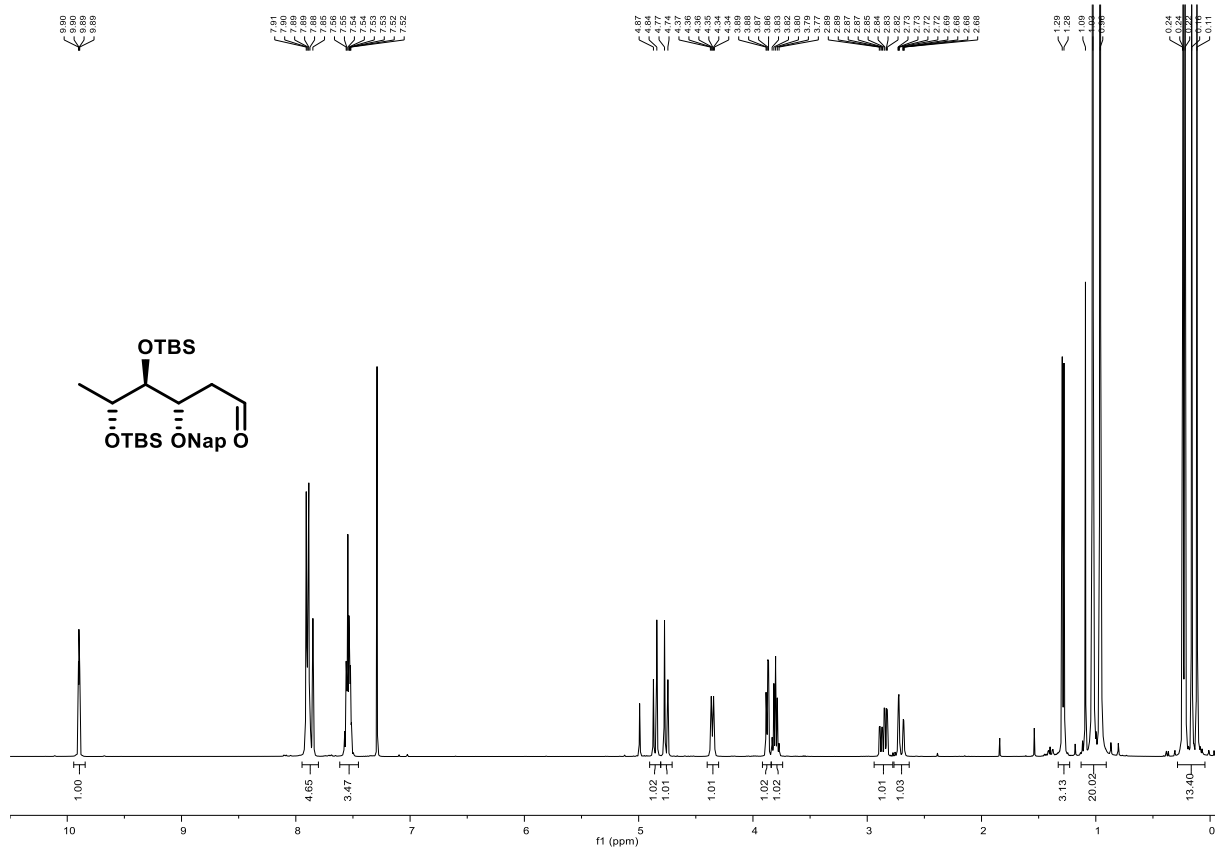

$^{13}\text{C}$  NMR, 101 MHz,  $\text{CDCl}_3$  of **15**

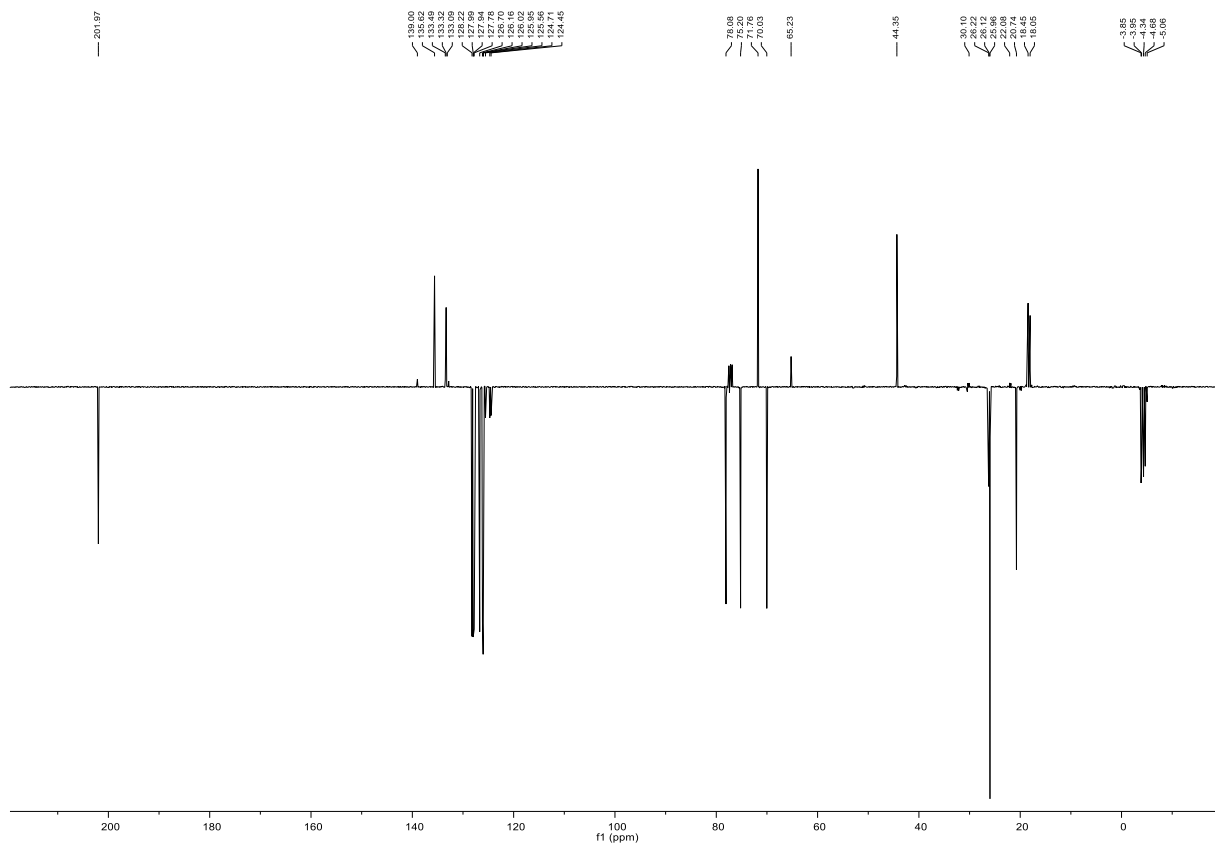

HH-COSY NMR, CDCl<sub>3</sub> of **15**

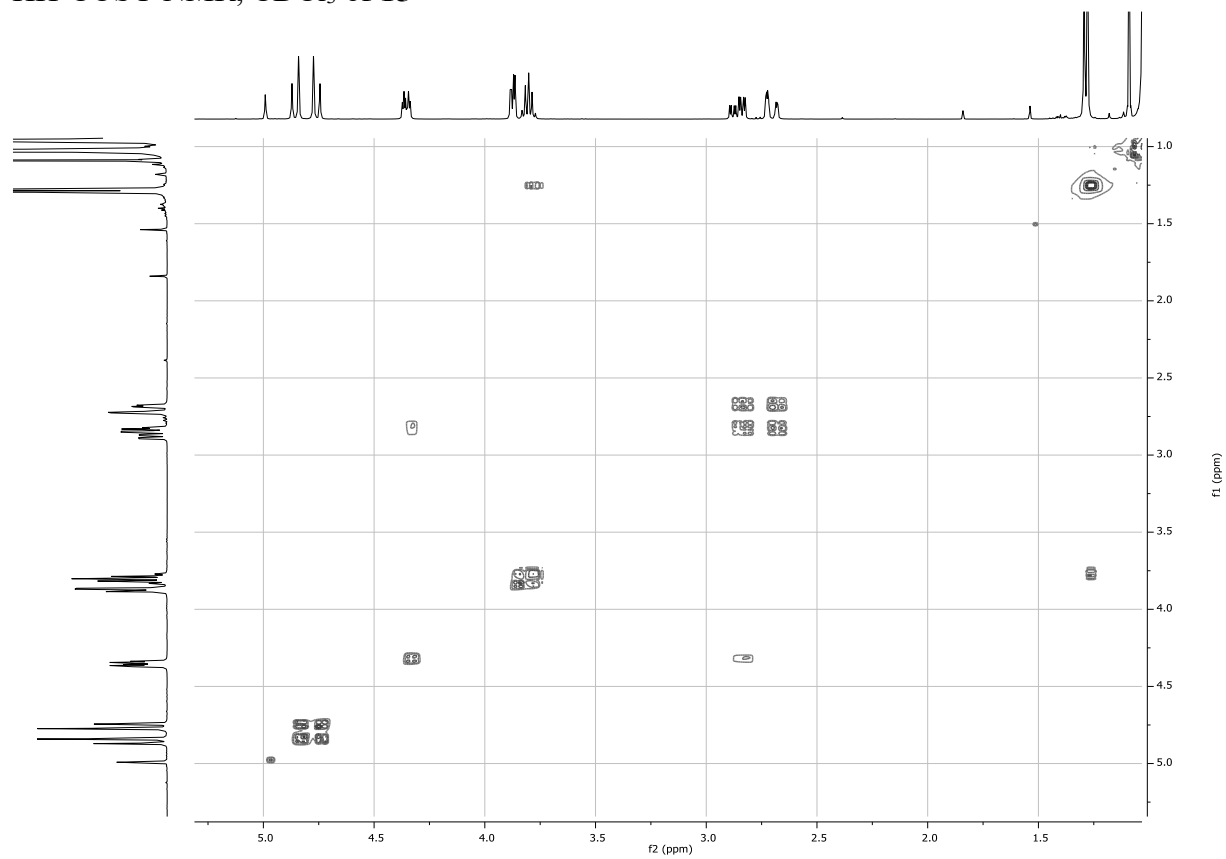

HSQC NMR, CDCl<sub>3</sub> of **15**

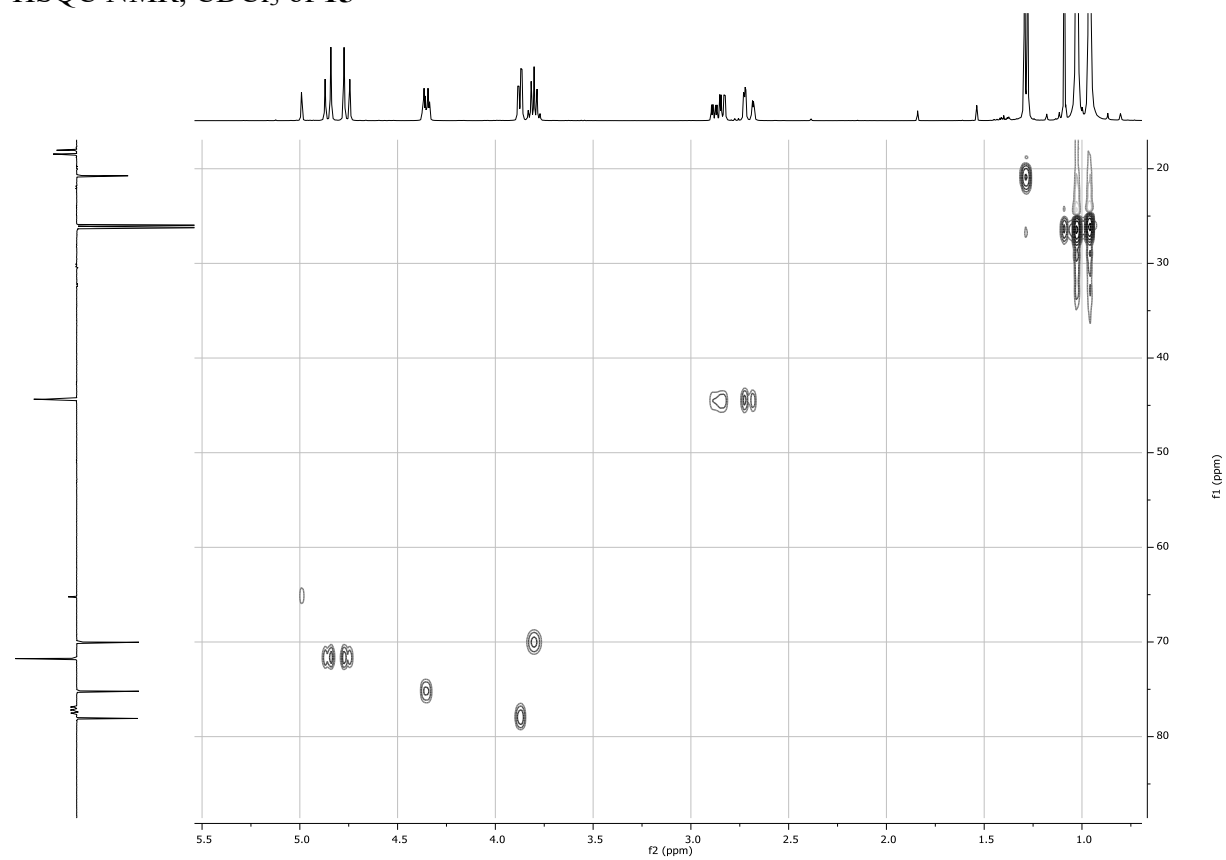

$^1\text{H}$  NMR, 400 MHz,  $\text{CDCl}_3$  of **16**

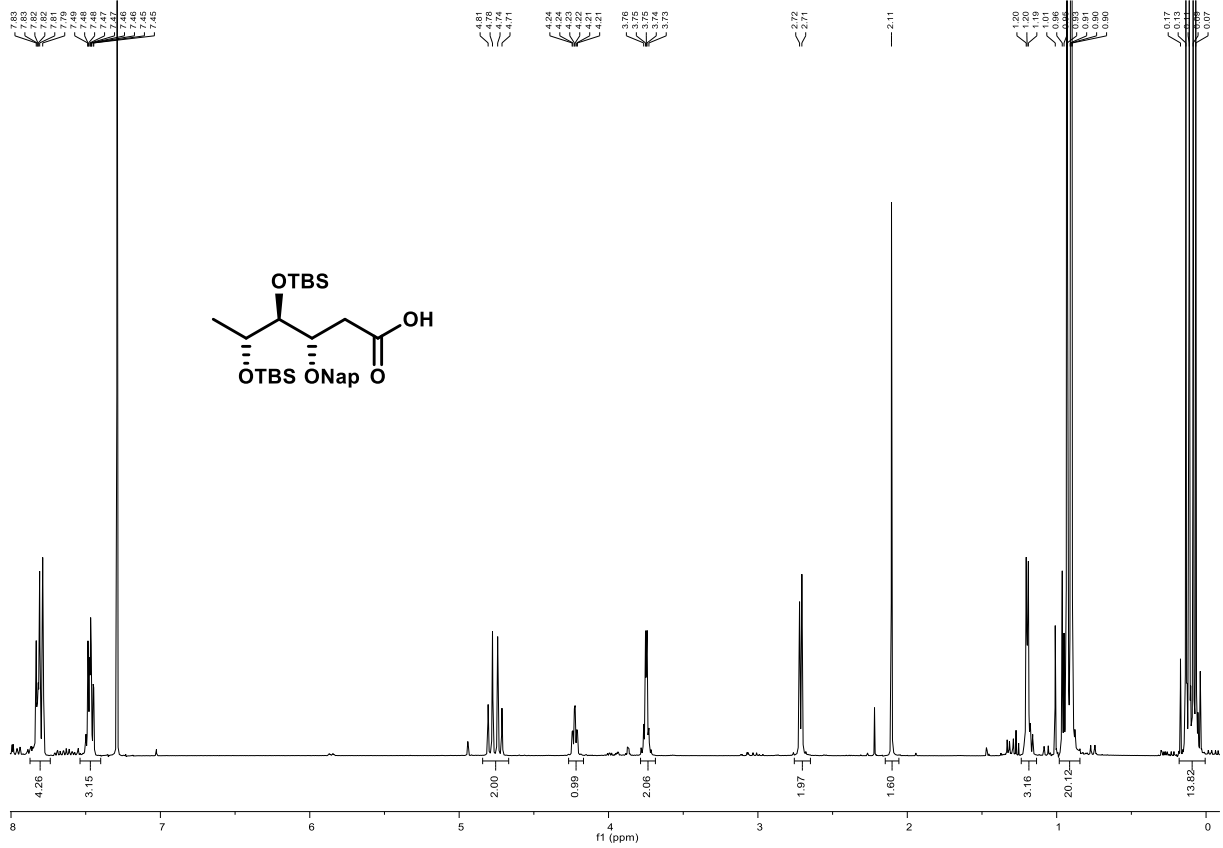

$^{13}\text{C}$  NMR, 101 MHz,  $\text{CDCl}_3$  of **16**

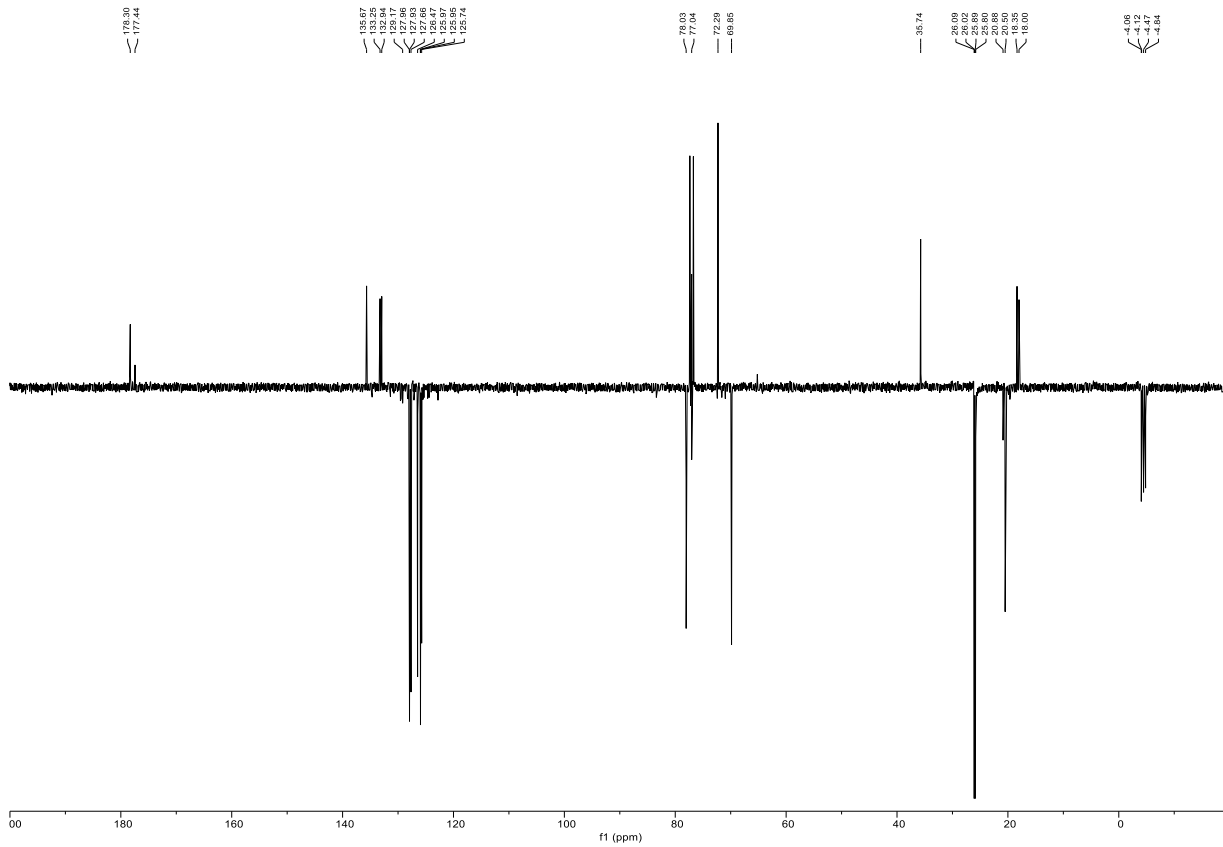



HH-COSY NMR, CDCl<sub>3</sub> of **16**

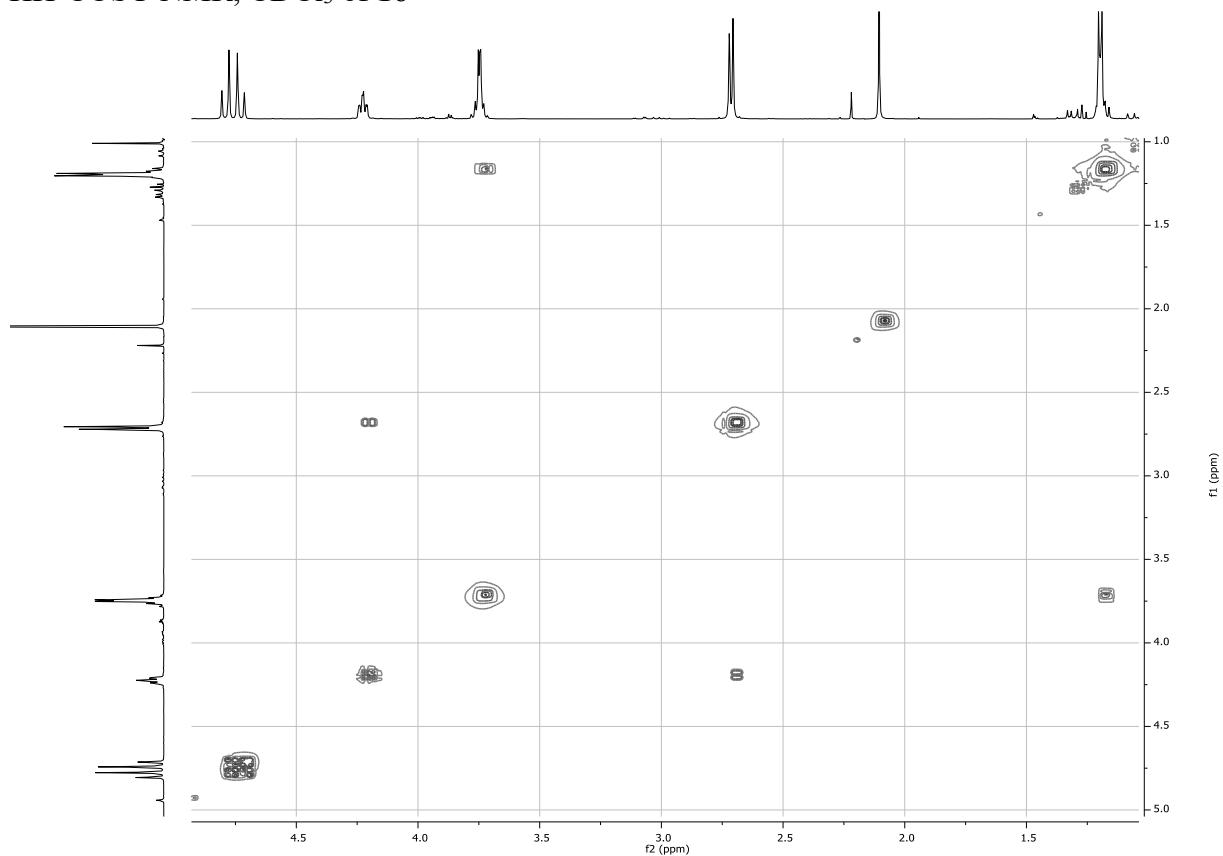

HSQC NMR, CDCl<sub>3</sub> of **16**

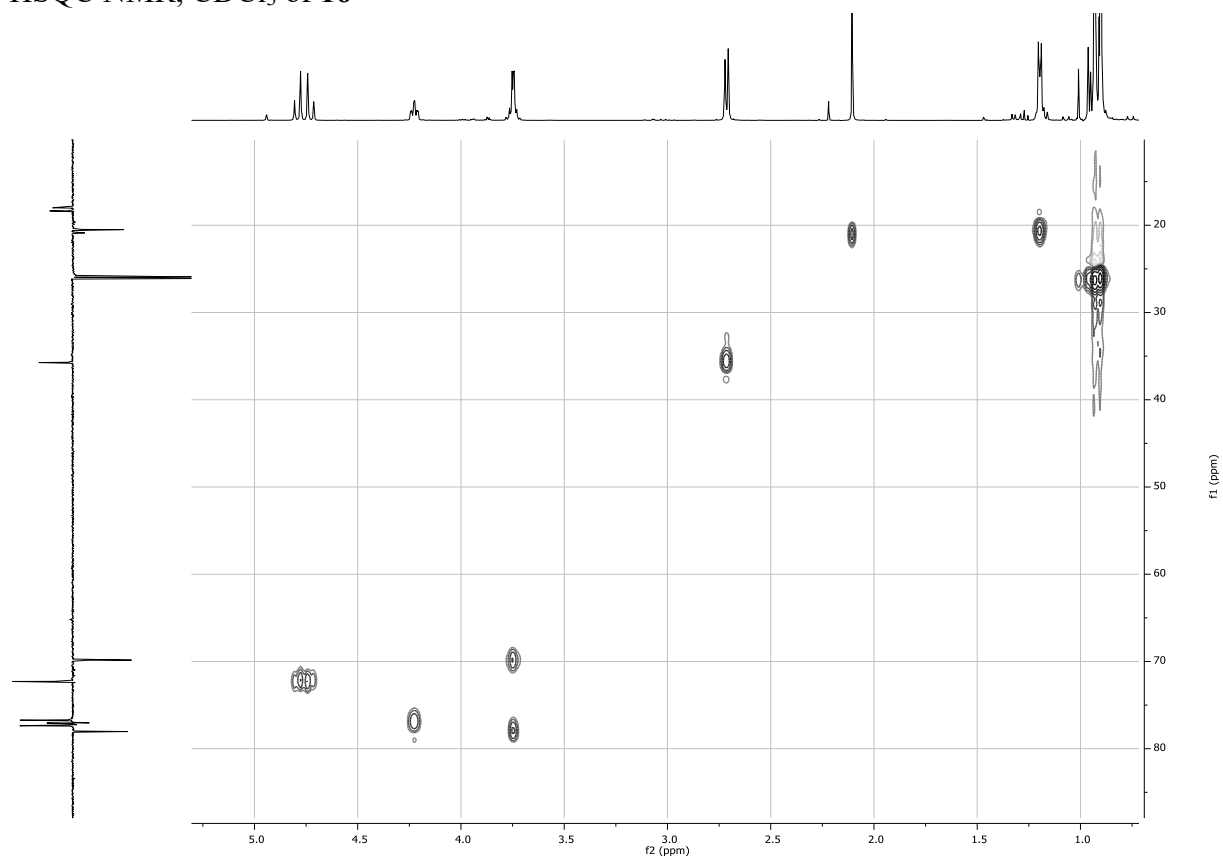

$^1\text{H}$  NMR, 400 MHz,  $\text{CDCl}_3$  of **17**

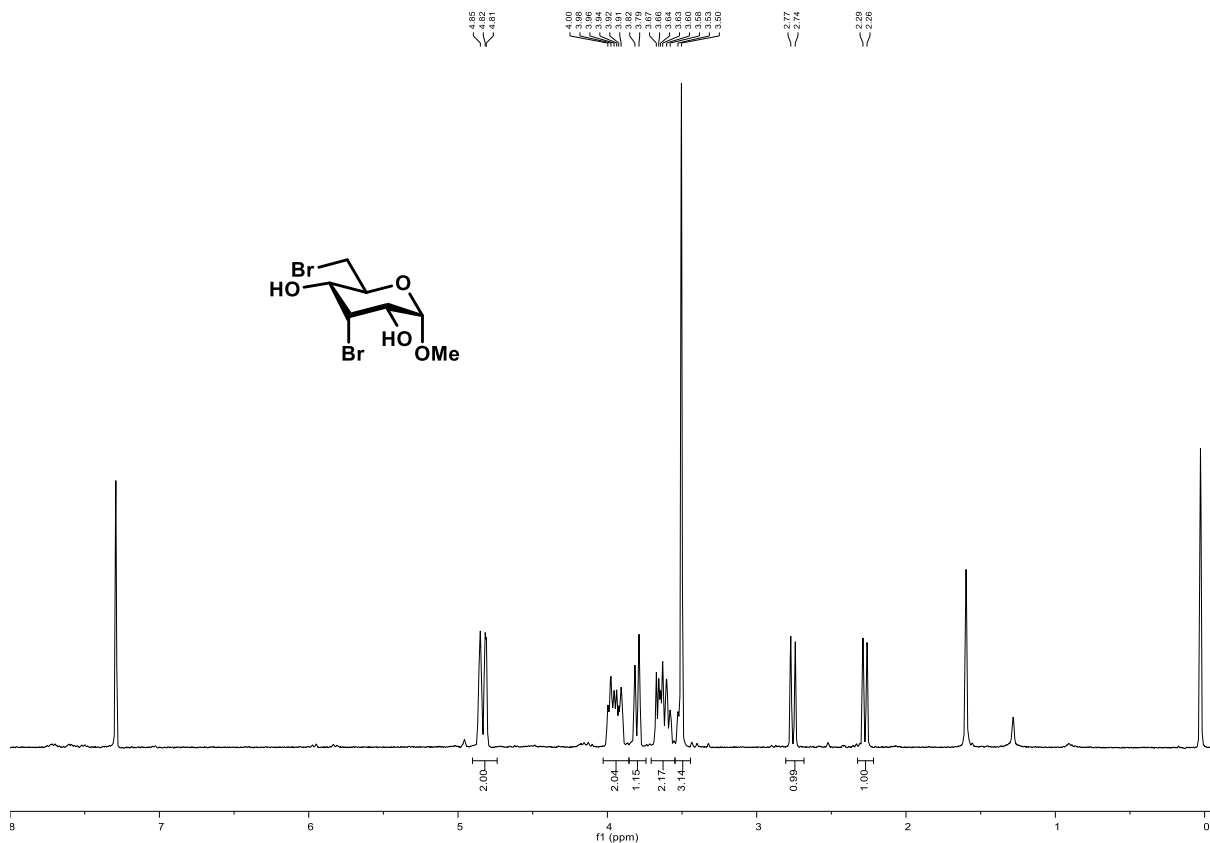

$^{13}\text{C}$  NMR, 101 MHz,  $\text{CDCl}_3$  of **17**

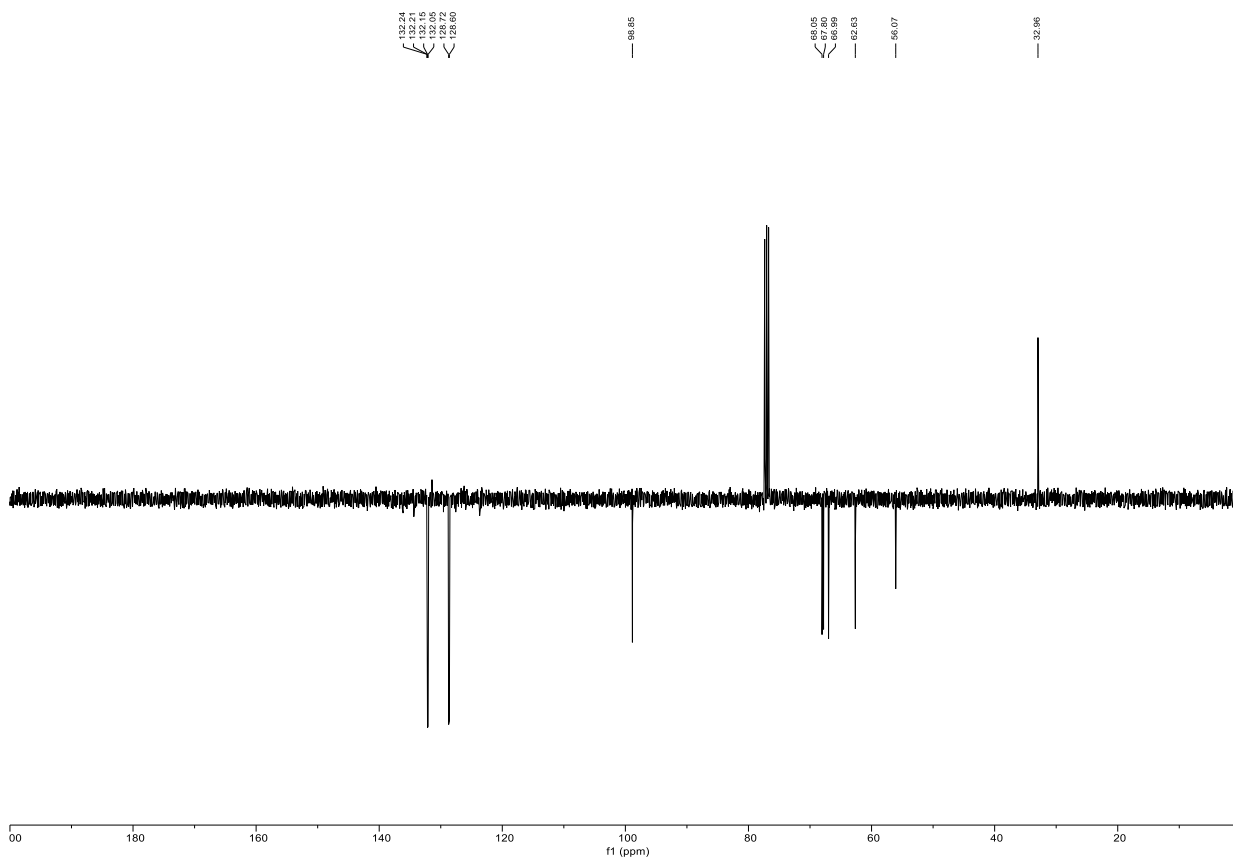

HH-COSY NMR, CDCl<sub>3</sub> of **17**

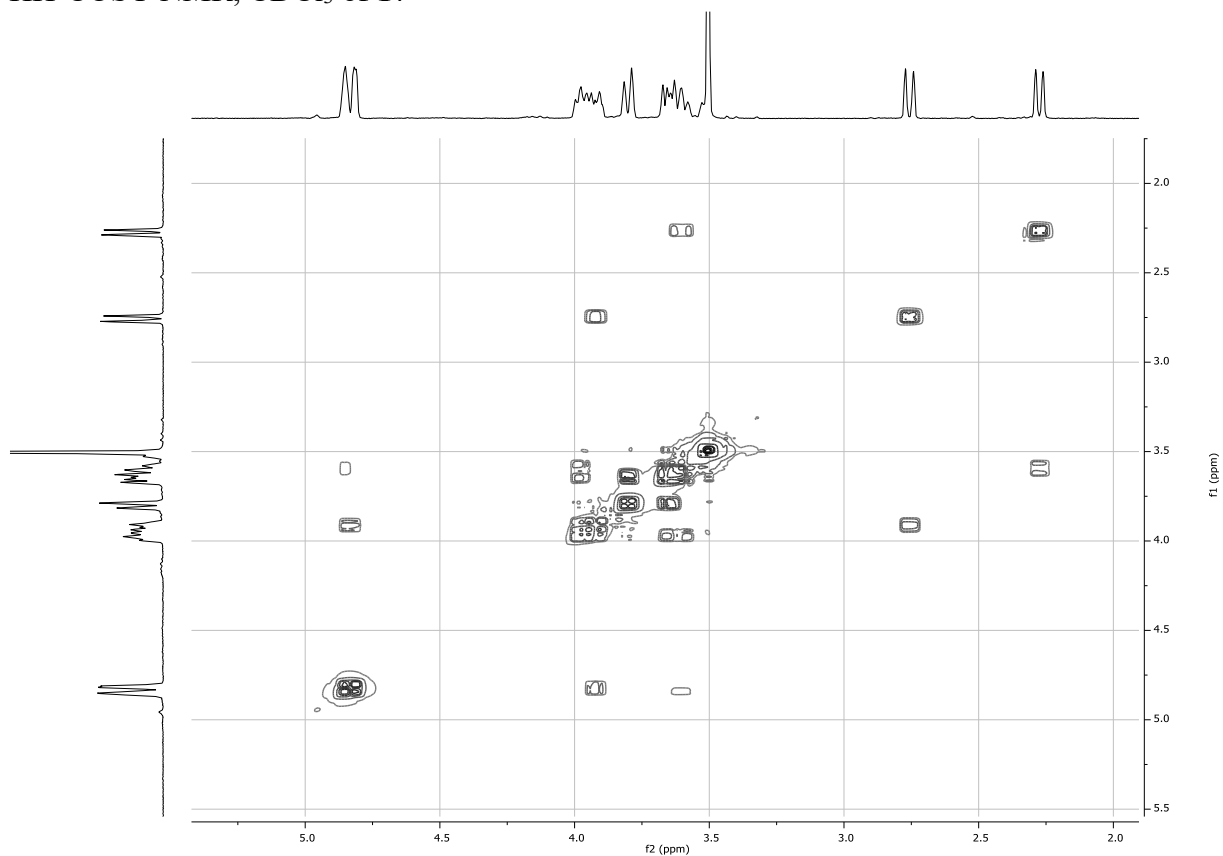

HSQC NMR, CDCl<sub>3</sub> of **17**

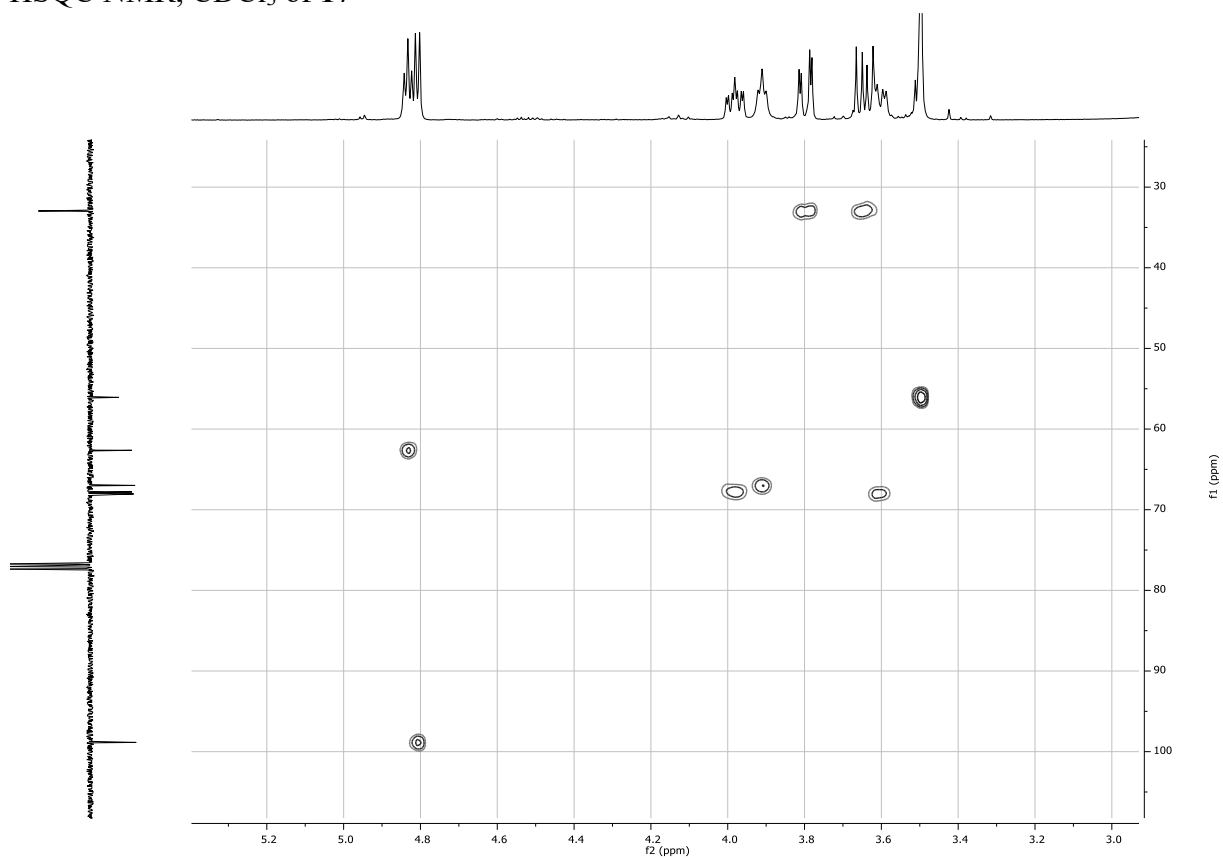

$^1\text{H}$  NMR, 400 MHz,  $\text{CDCl}_3$  of **18**

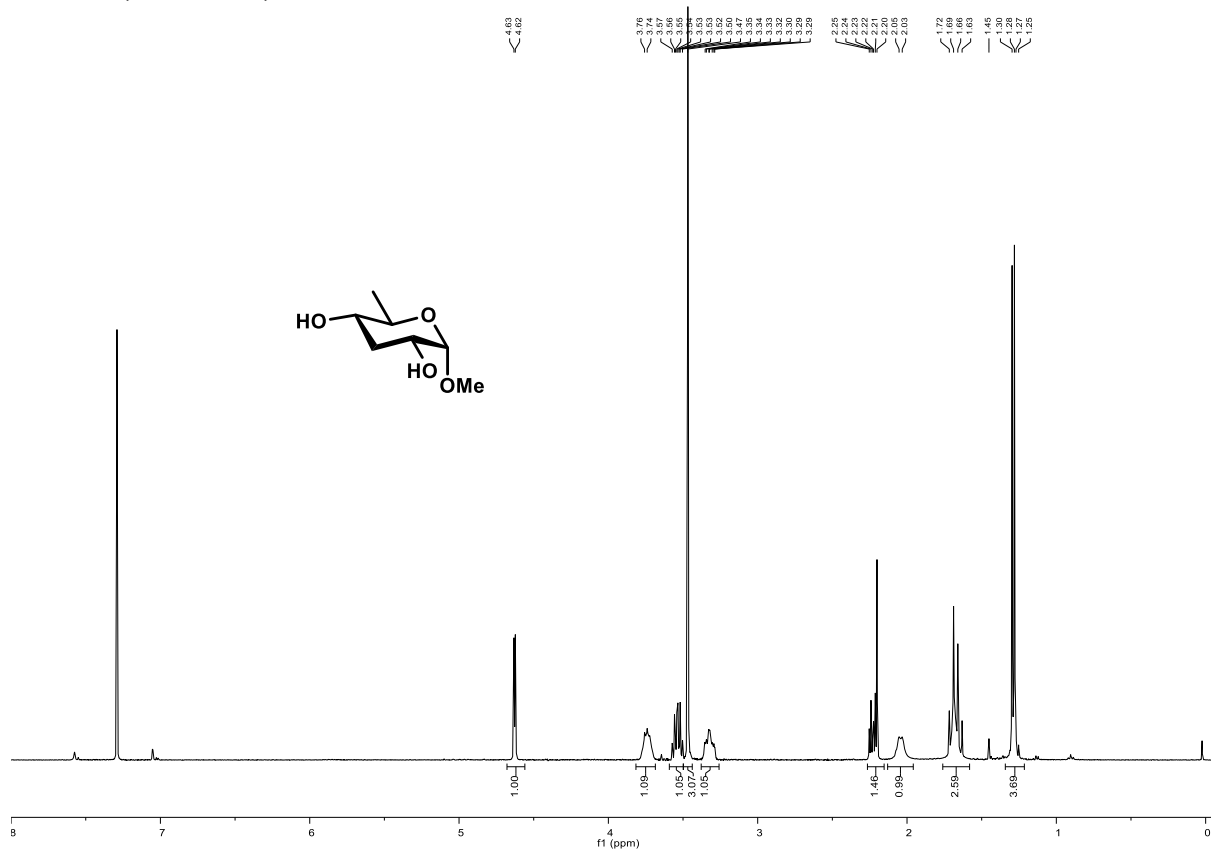

$^{13}\text{C}$  NMR, 101 MHz,  $\text{CDCl}_3$  of **18**

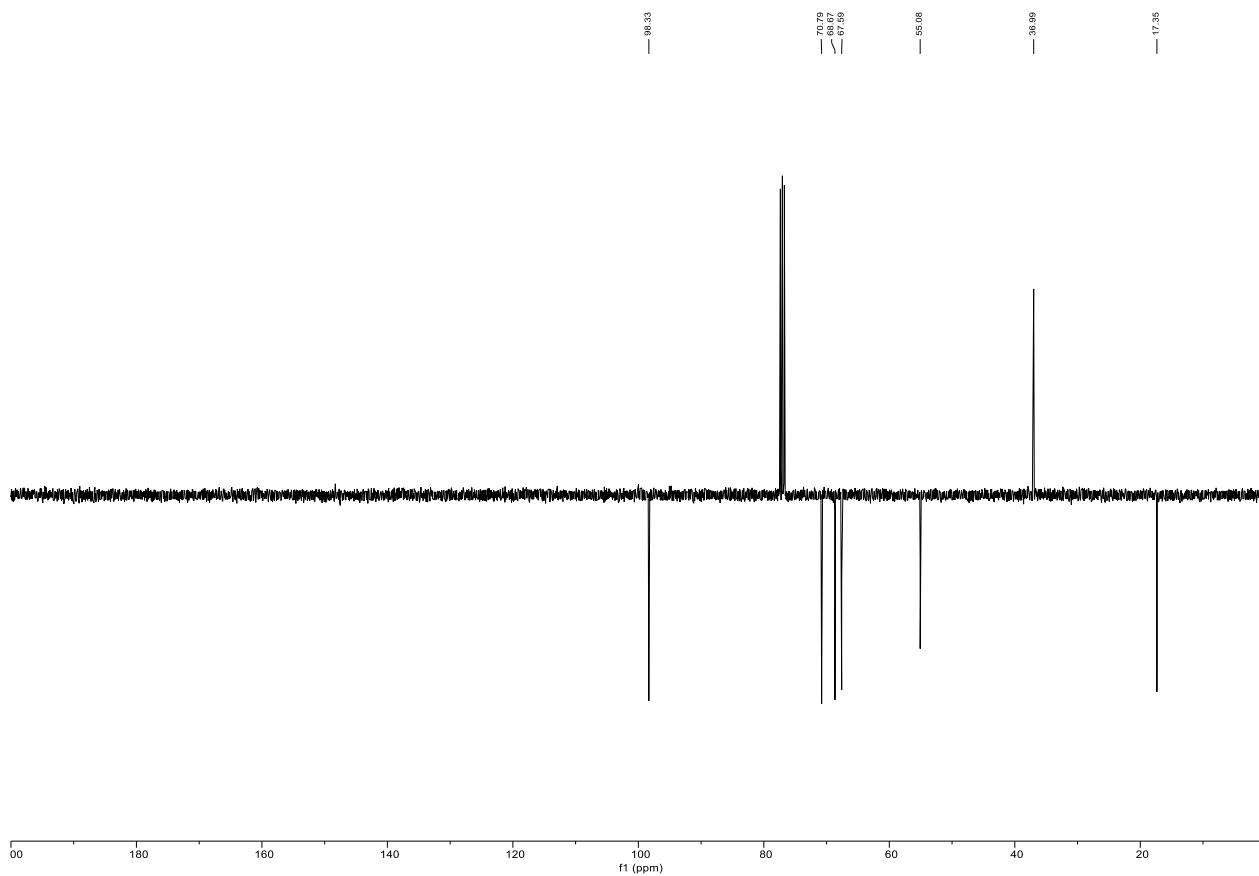

HH-COSY NMR, CDCl<sub>3</sub> of **18**

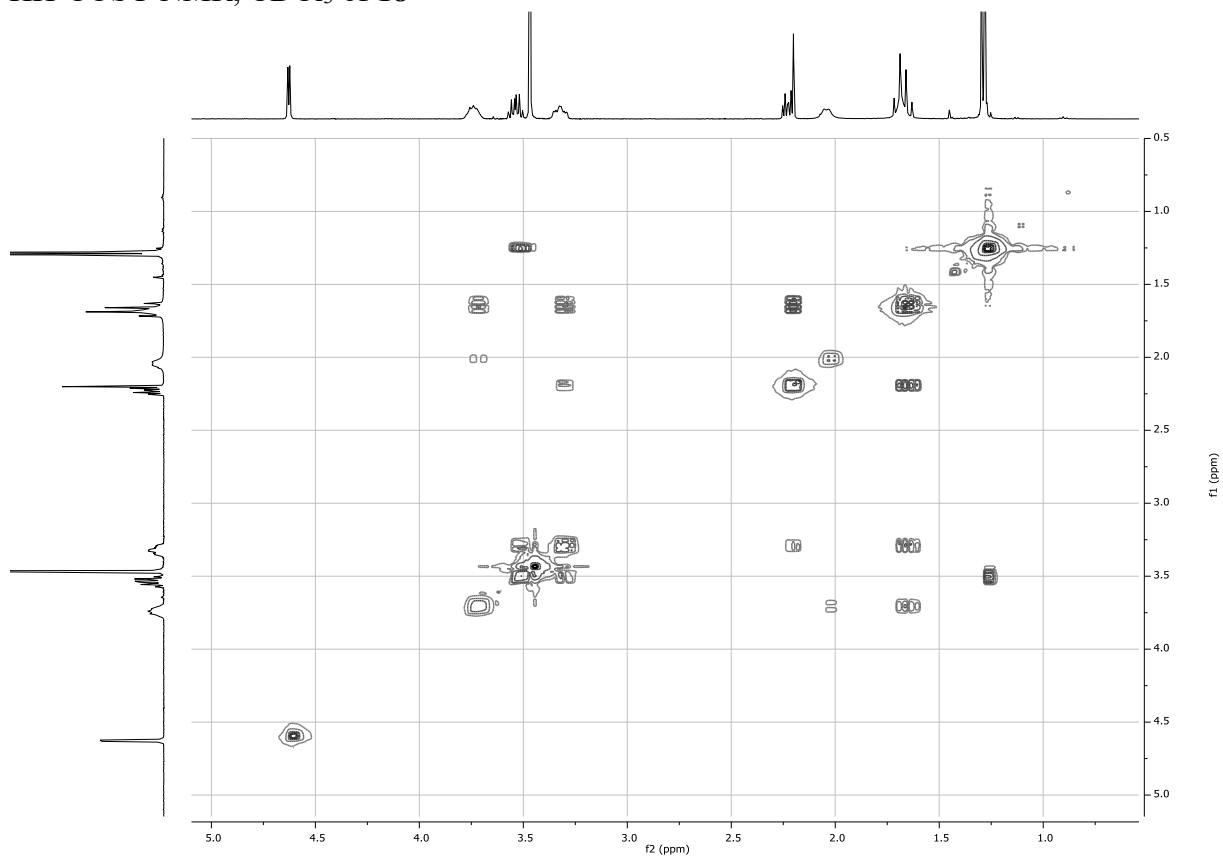

HSQC NMR, CDCl<sub>3</sub> of **18**

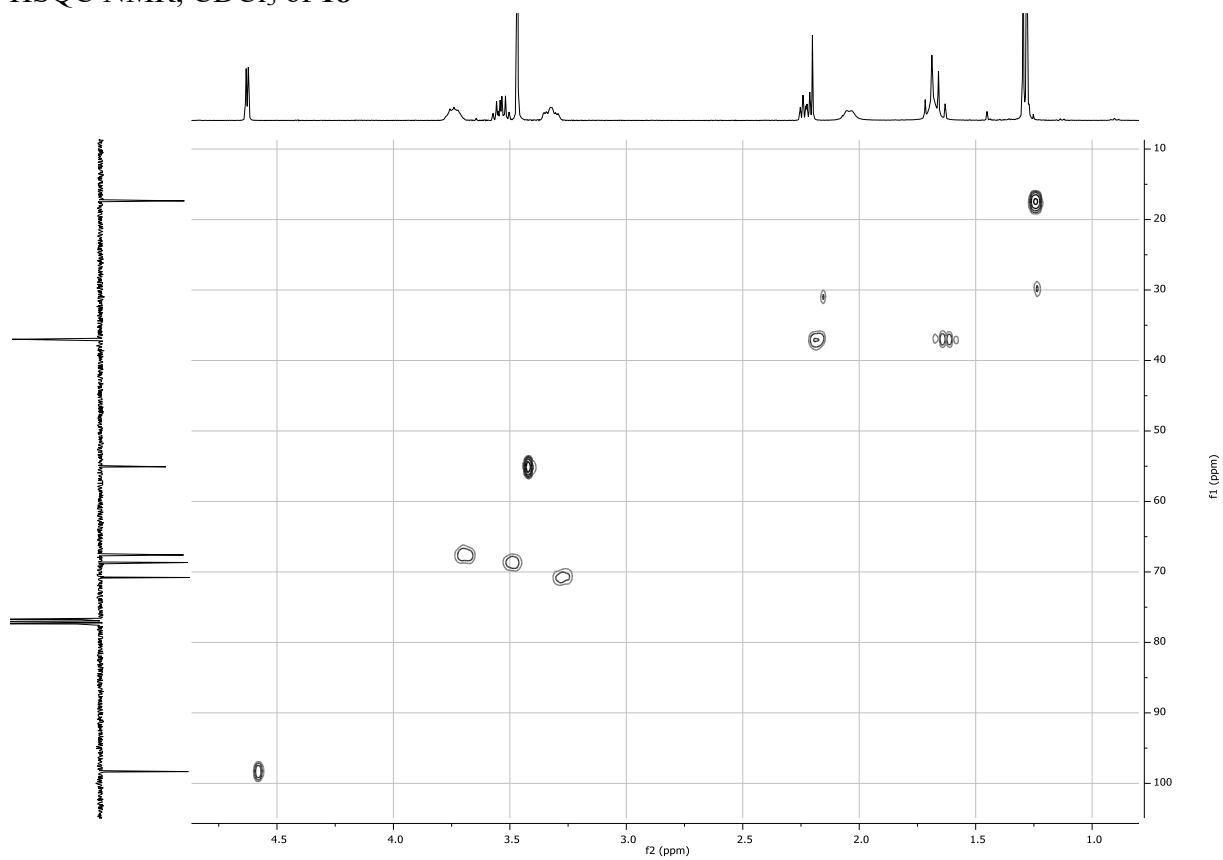



HH-COSY NMR, CDCl<sub>3</sub> of **19**

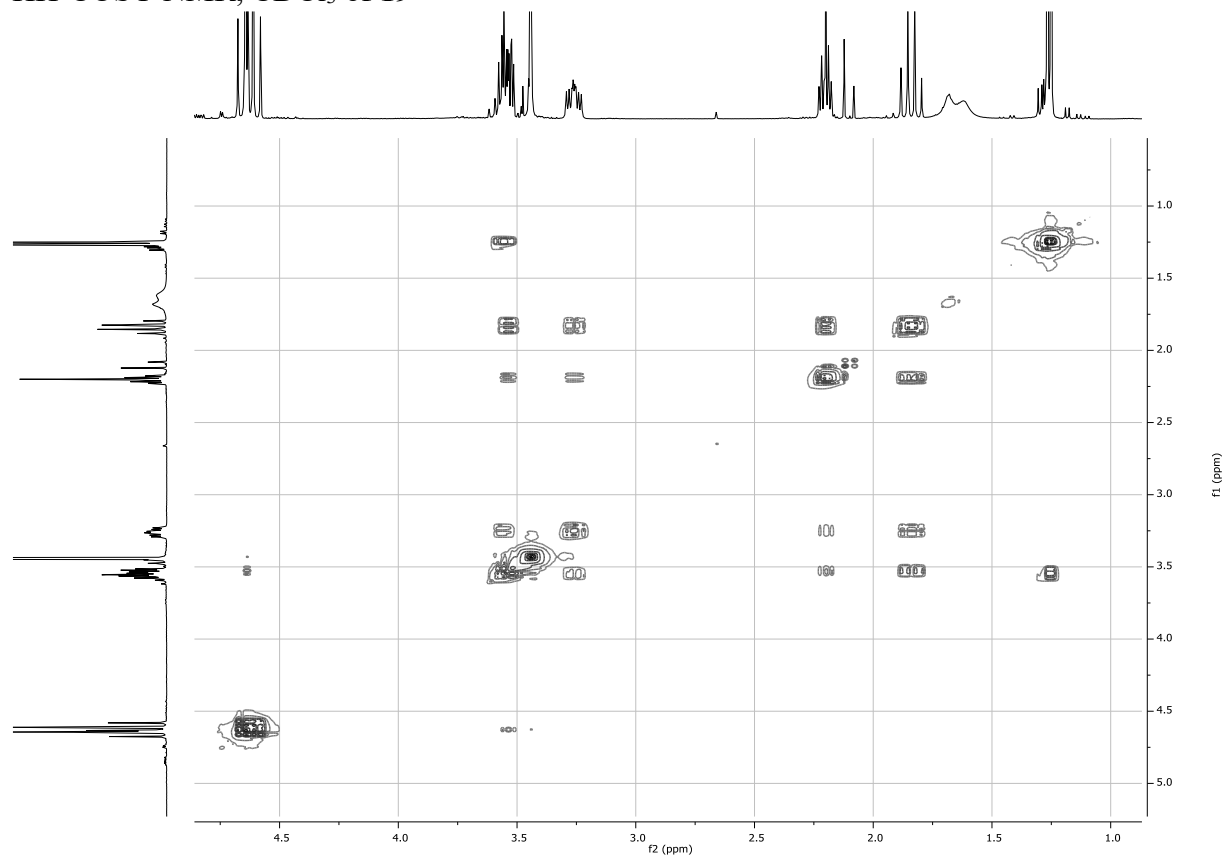

HSQC NMR, CDCl<sub>3</sub> of **19**

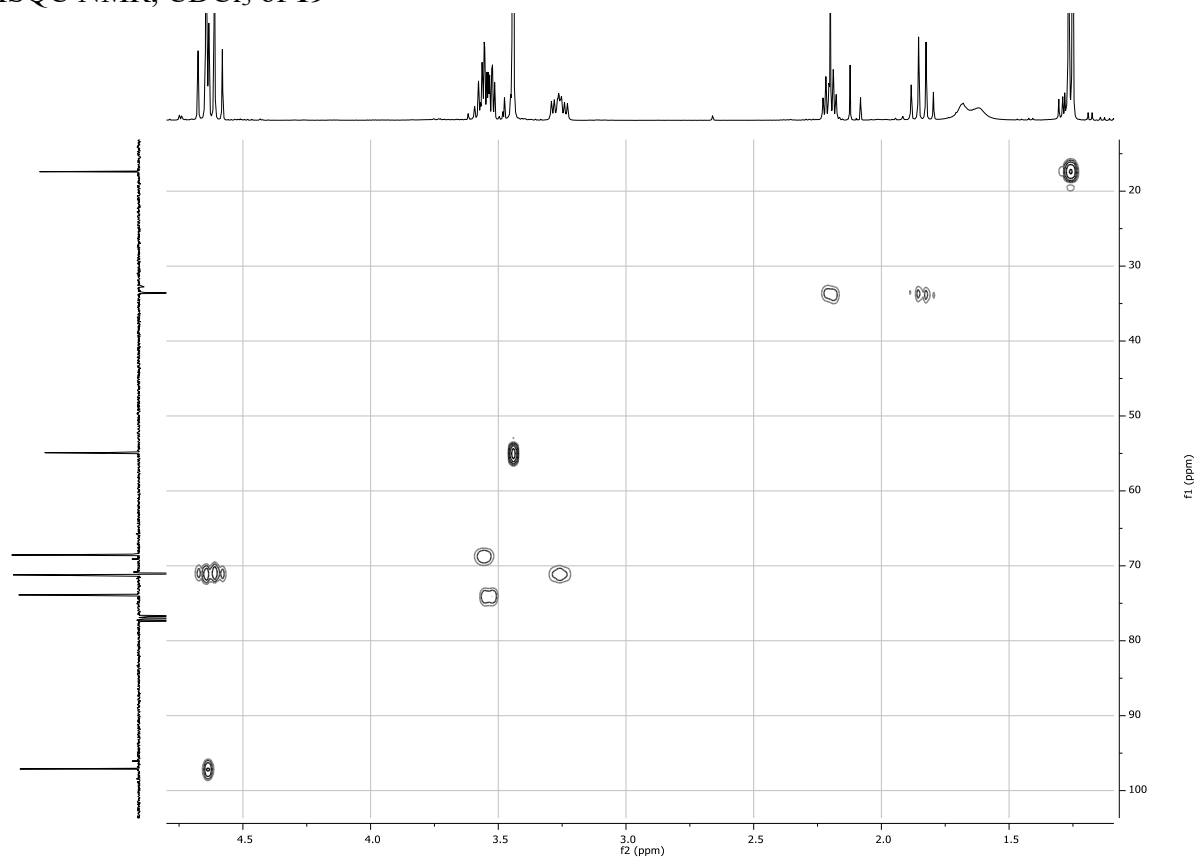

<sup>1</sup>H NMR, 400 MHz, CDCl<sub>3</sub> of **6**

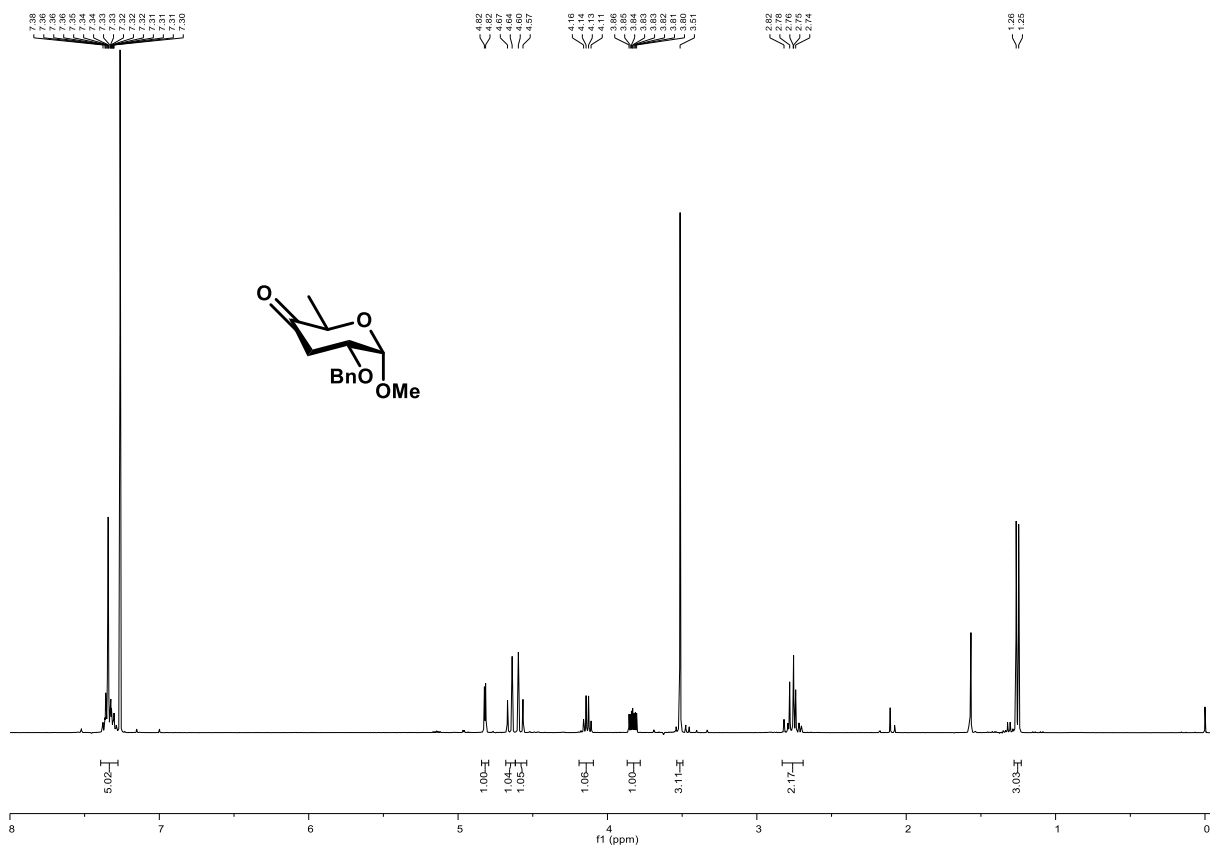

<sup>13</sup>C NMR, 101 MHz, CDCl<sub>3</sub> of **6**

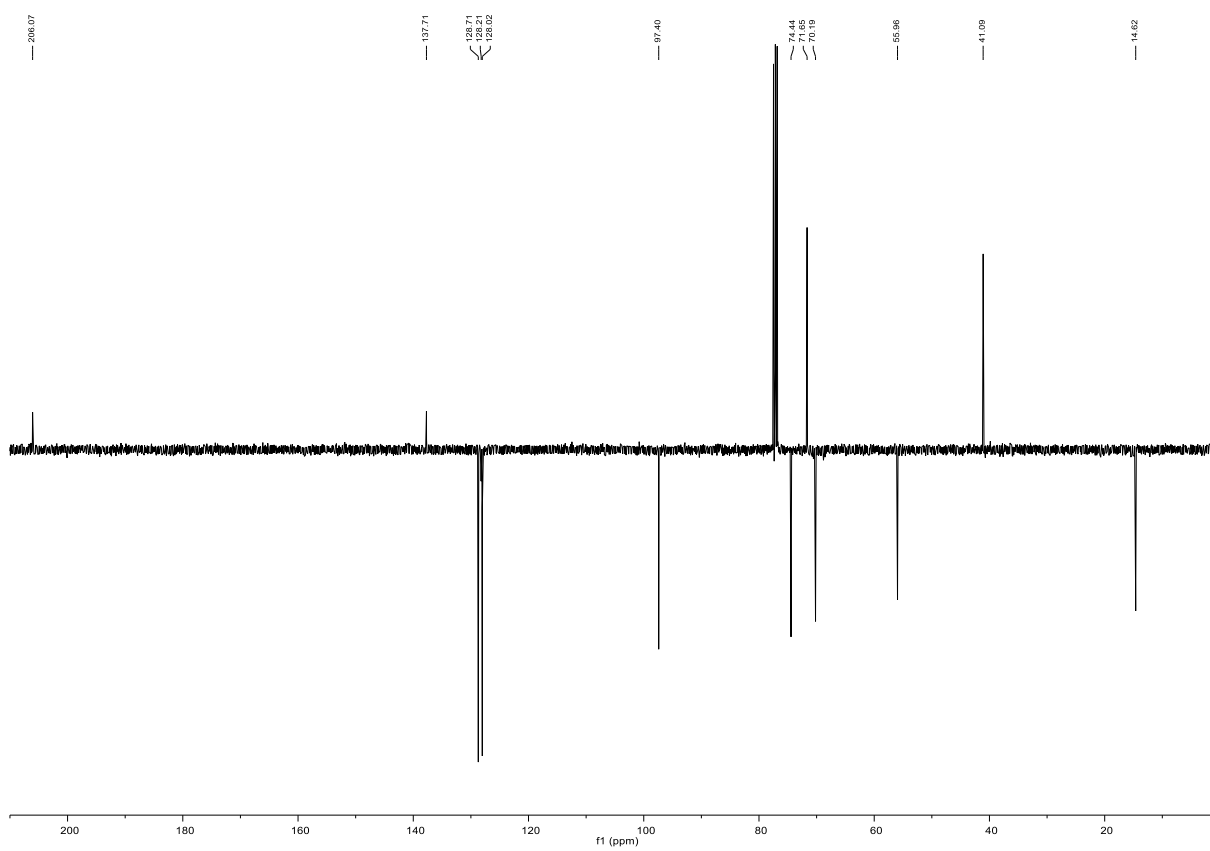



HH-COSY NMR, CDCl<sub>3</sub> of **6**

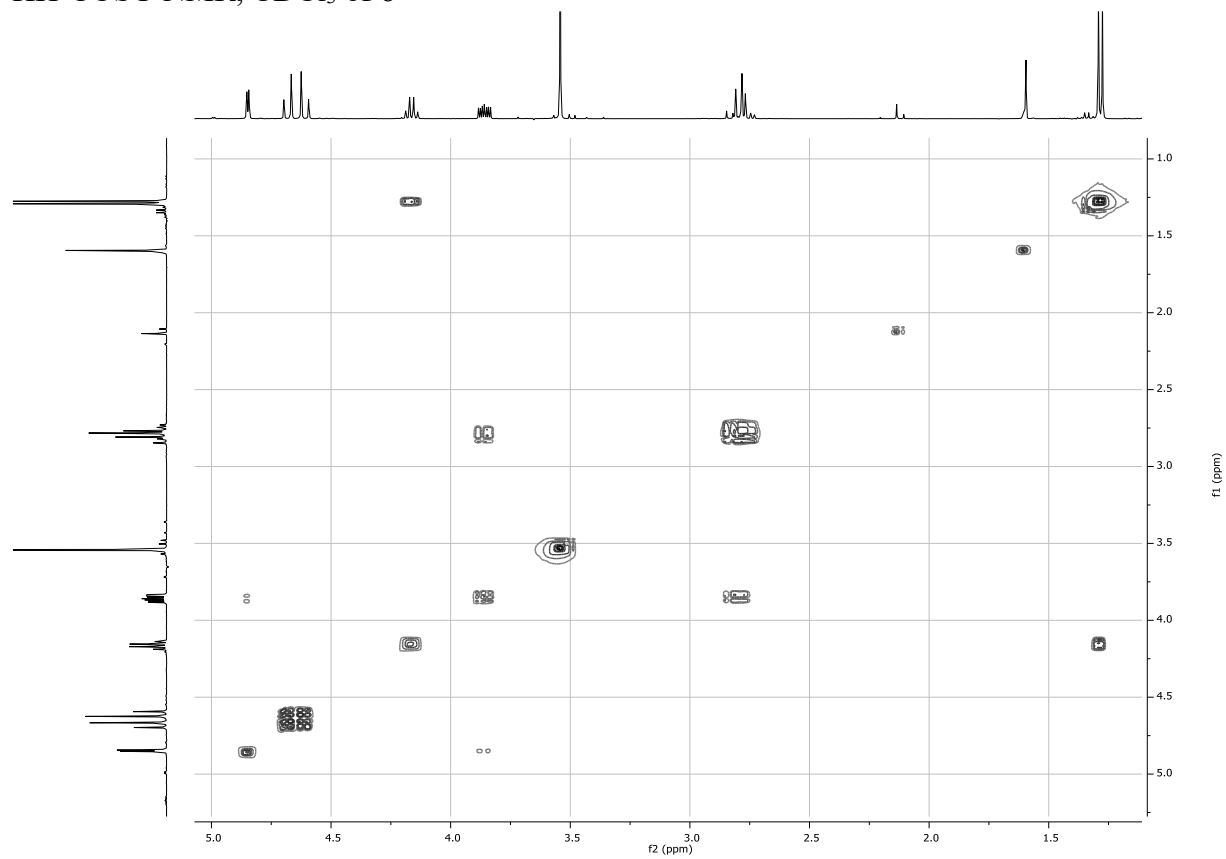

HSQC NMR, CDCl<sub>3</sub> of **6**

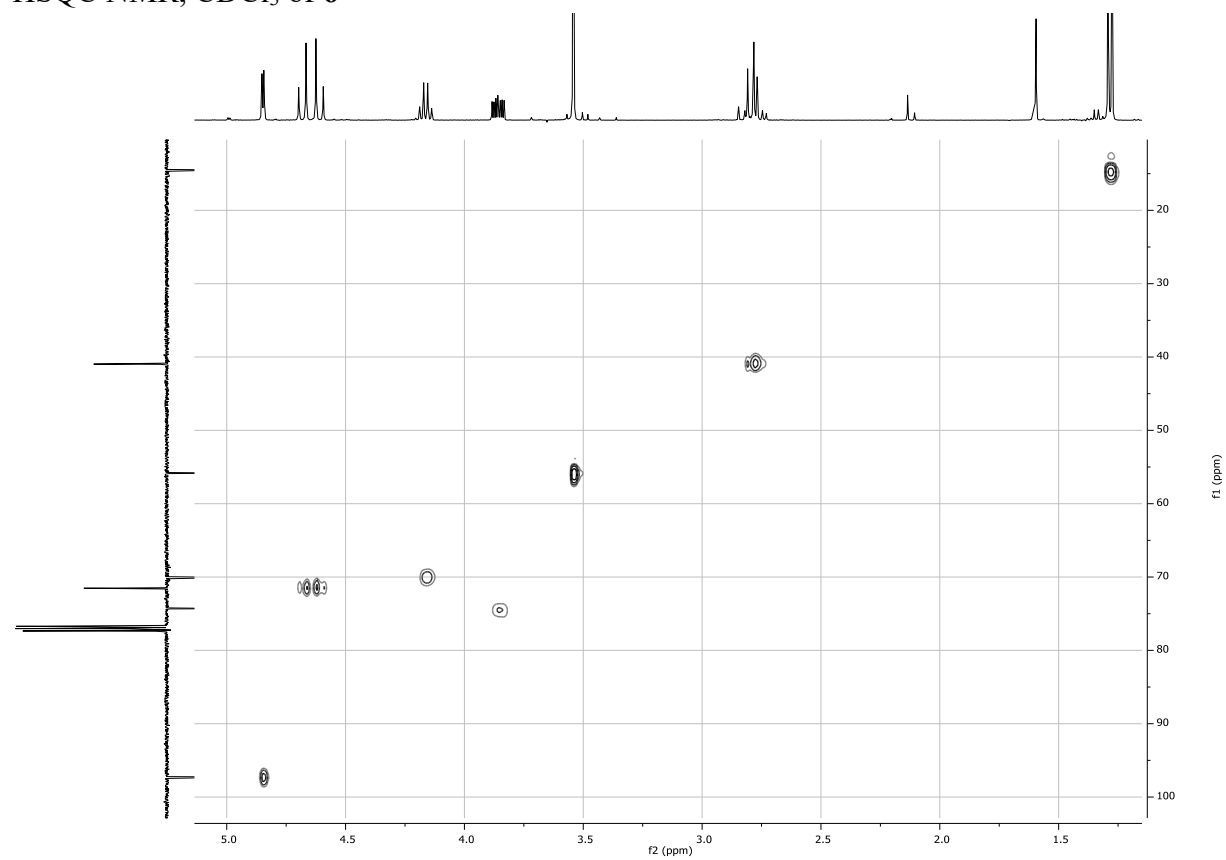



HH-COSY NMR, CDCl<sub>3</sub> of **20**

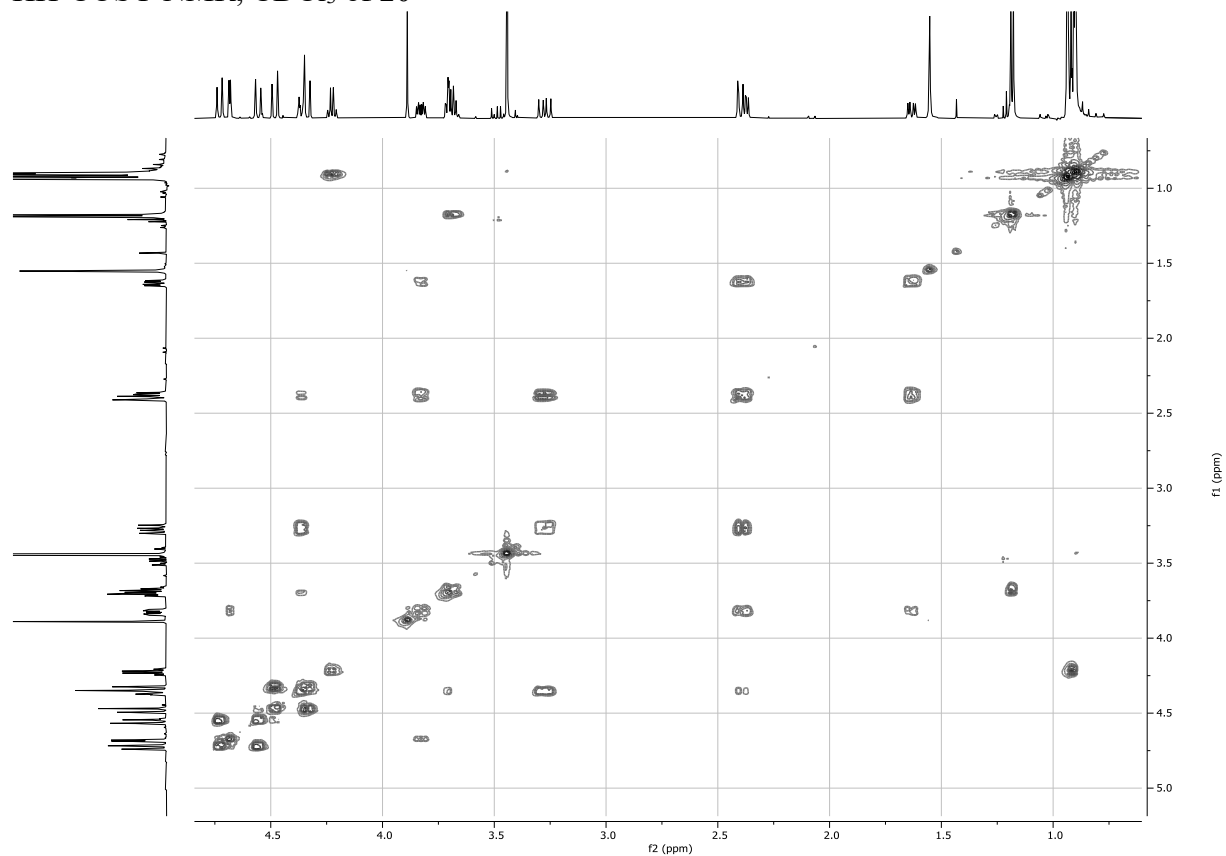

HSQC NMR, CDCl<sub>3</sub> of **20**

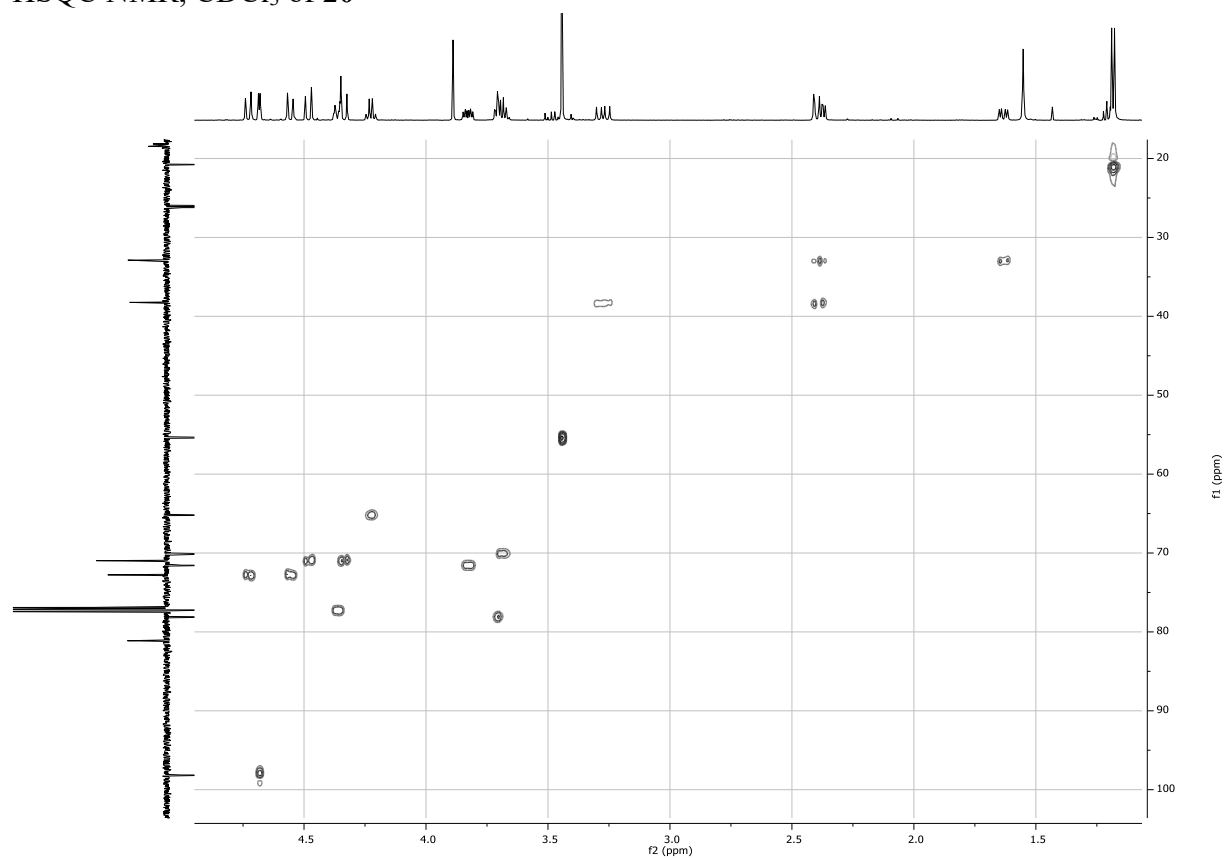

NOESY NMR, CDCl<sub>3</sub> of **20**

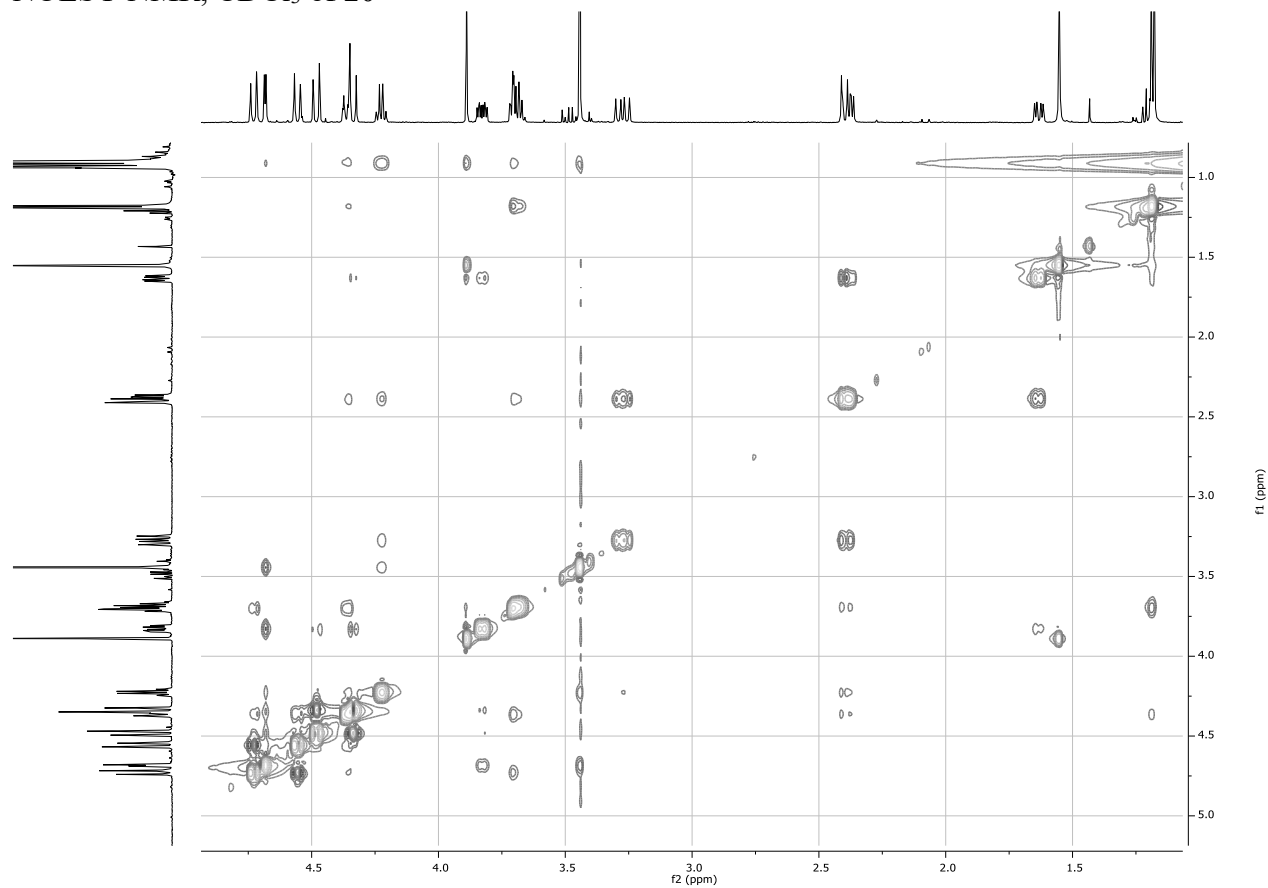

<sup>1</sup>H NMR, 500 MHz, CDCl<sub>3</sub> of **21**

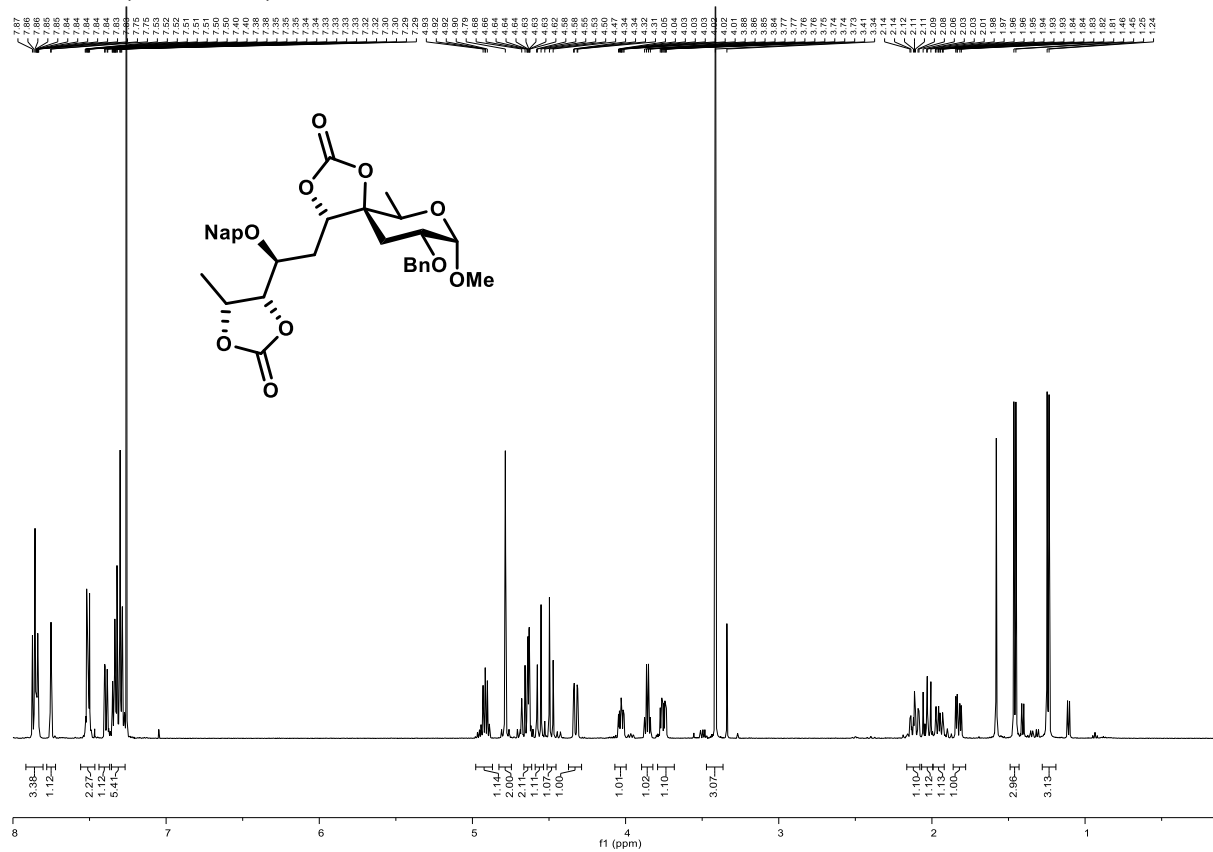

$^{13}\text{C}$  NMR, 126 MHz,  $\text{CDCl}_3$  of **21**

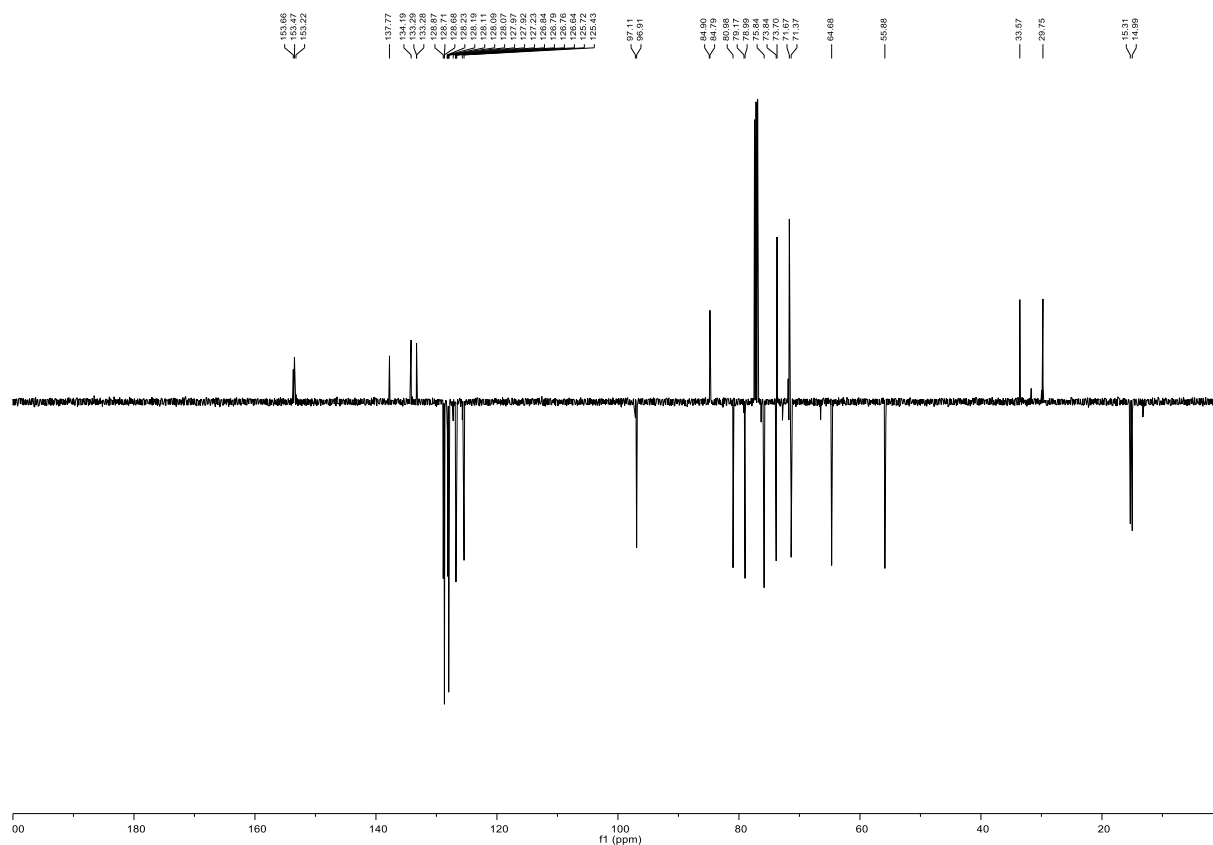

HH-COSY NMR,  $\text{CDCl}_3$  of **21**

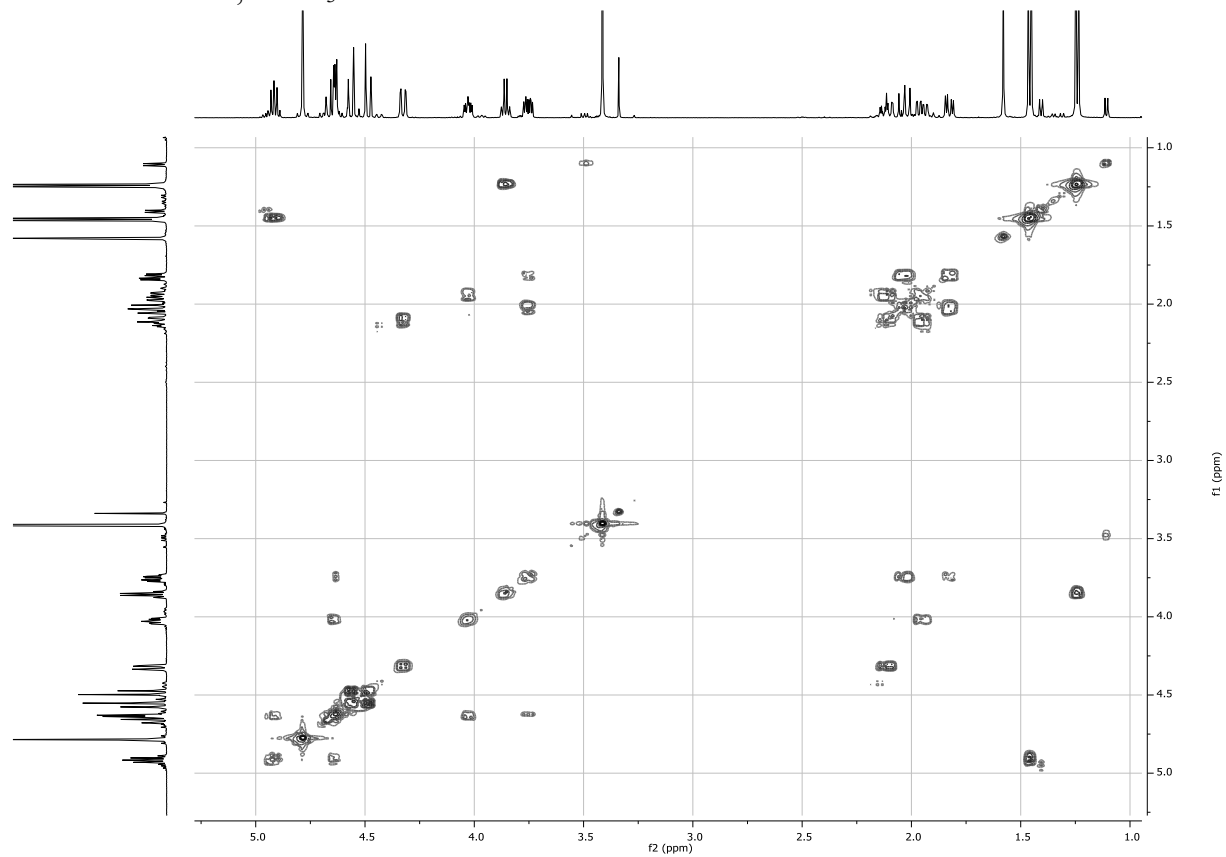

HSQC NMR, CDCl<sub>3</sub> of **21**

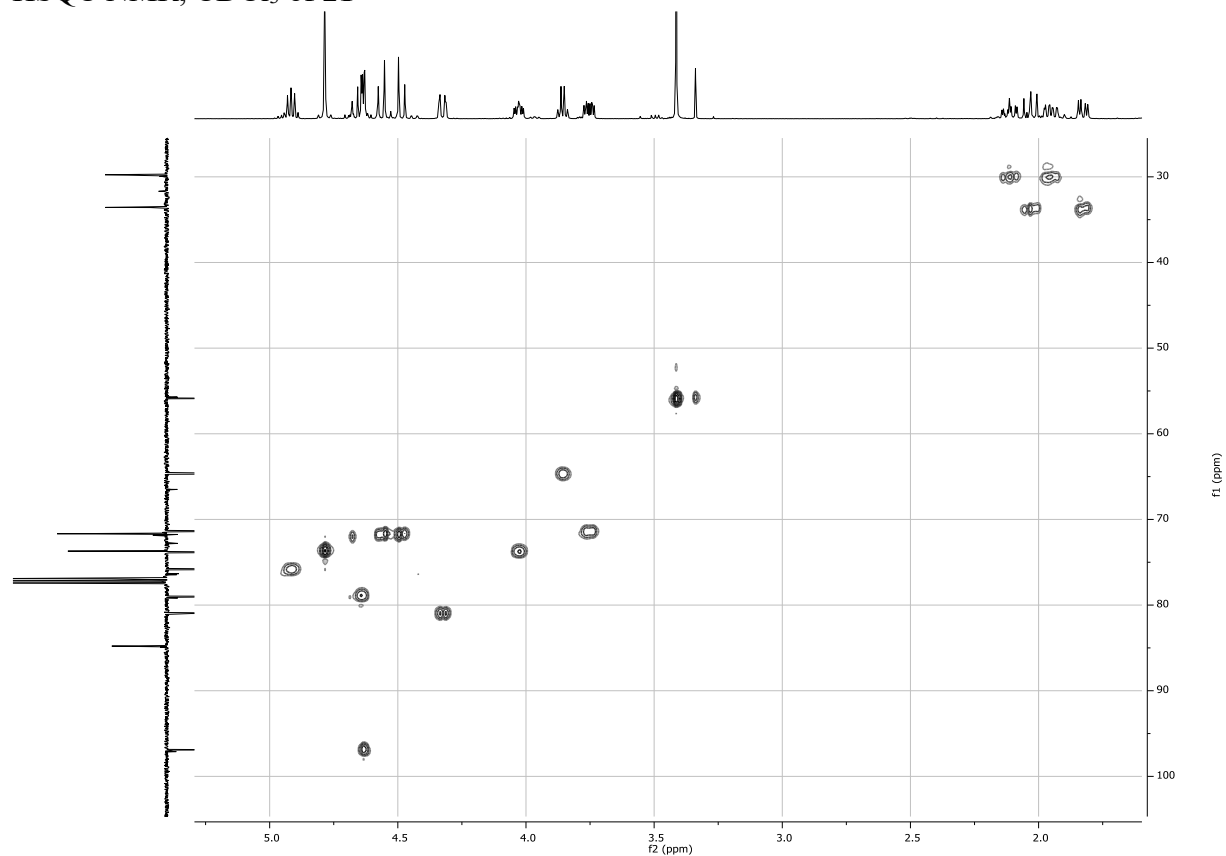

NOESY NMR, CDCl<sub>3</sub> of **21**

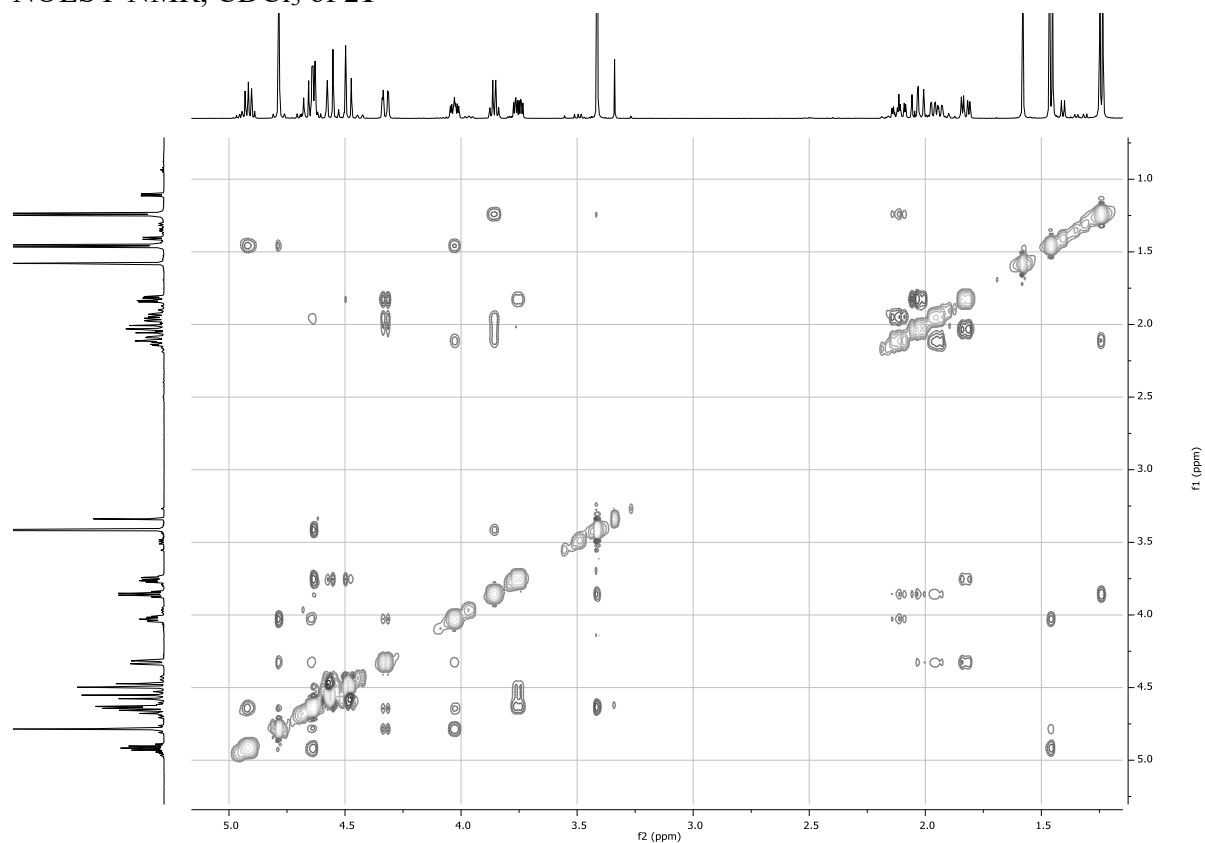

$^1\text{H}$  NMR, 400 MHz,  $\text{CDCl}_3$  of **22**

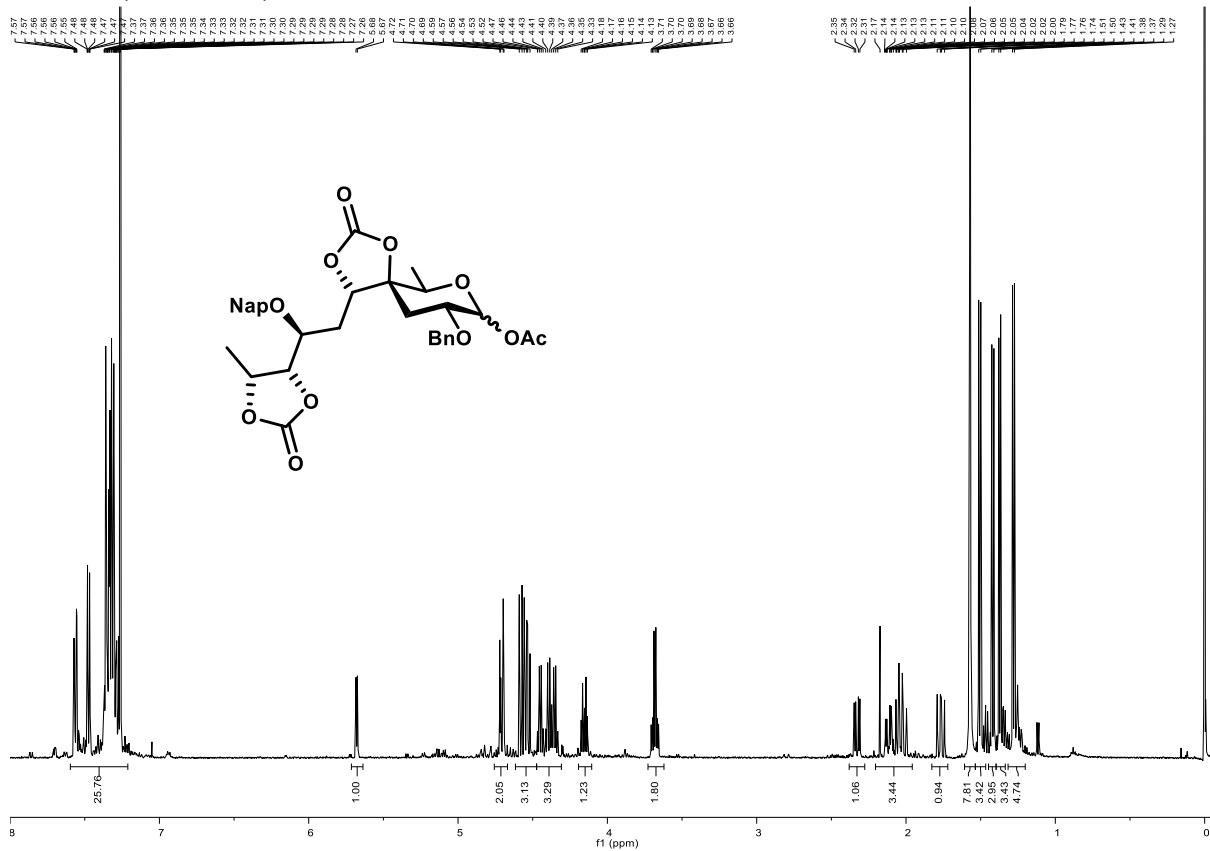

$^{13}\text{C}$  NMR, 101 MHz,  $\text{CDCl}_3$  of **22**

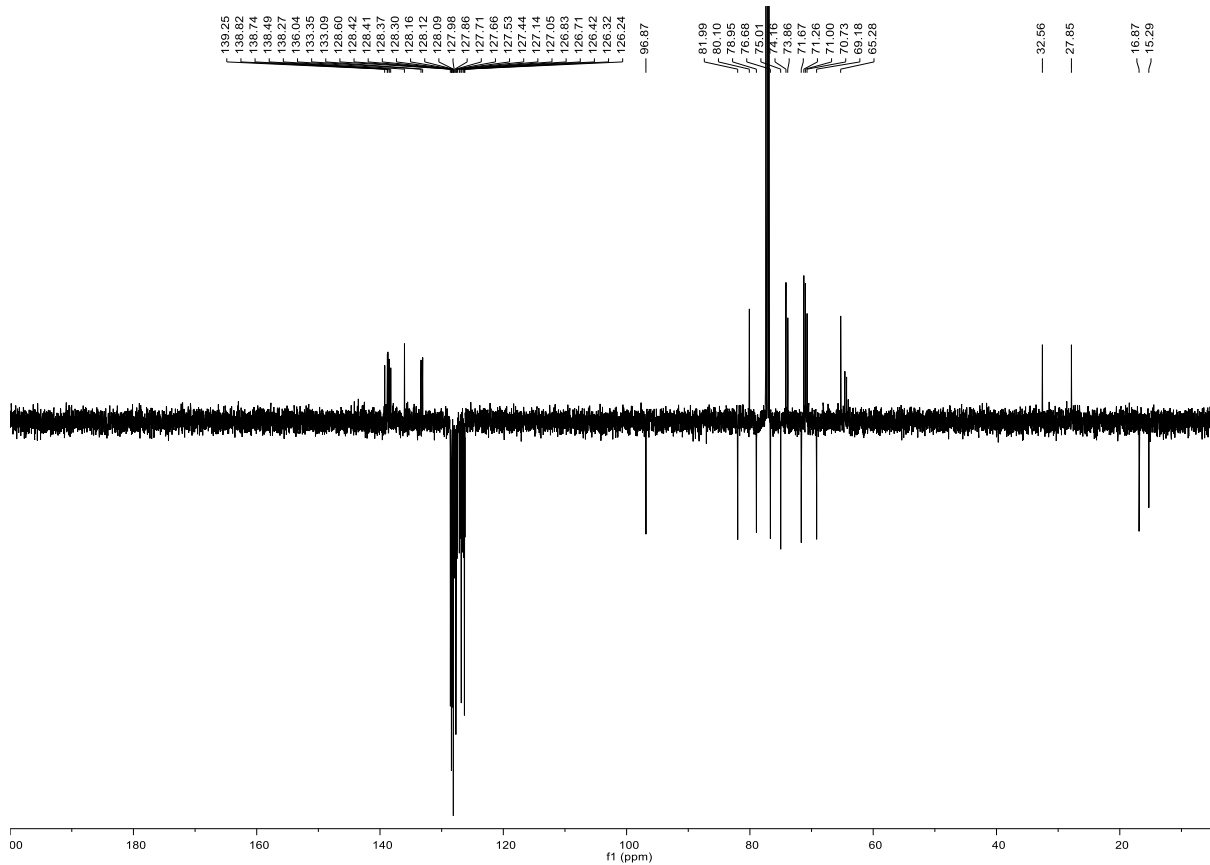

HH-COSY NMR, CDCl<sub>3</sub> of **22**

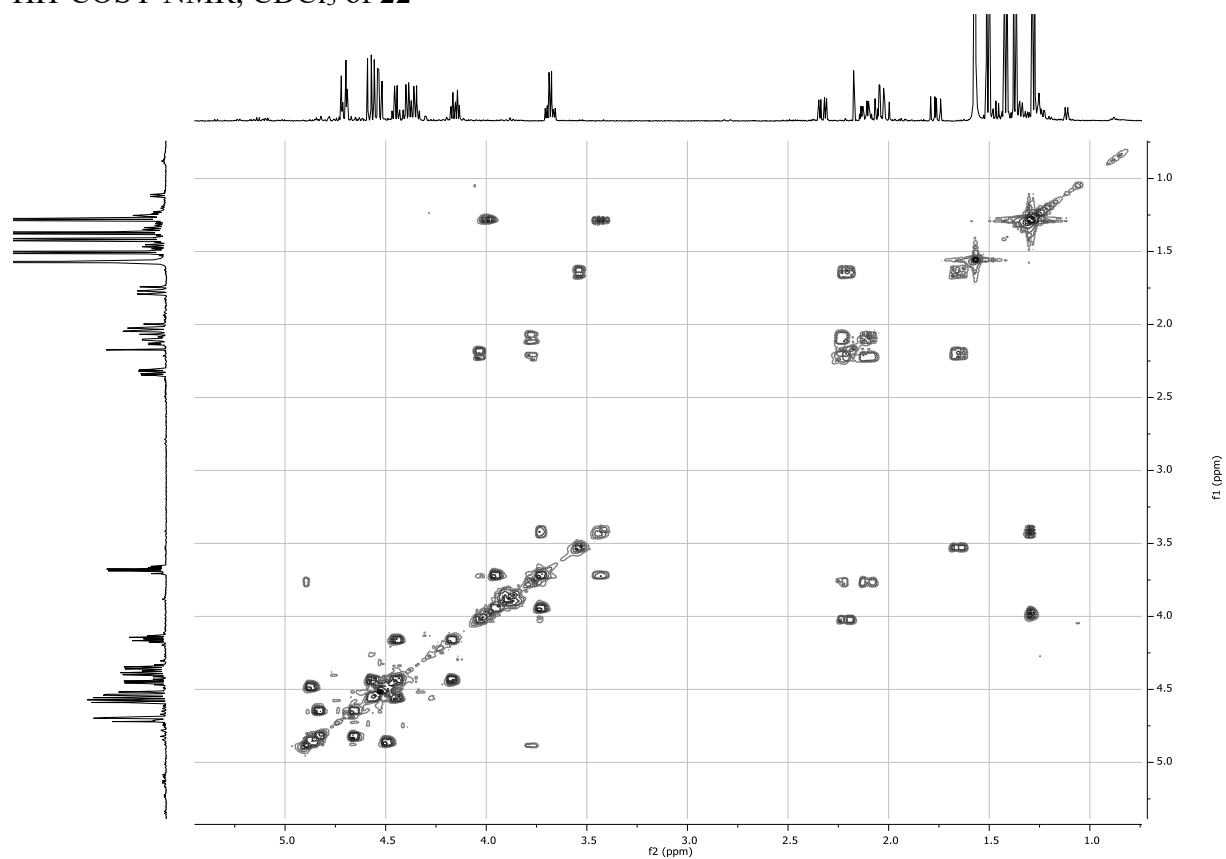

HSQC NMR, CDCl<sub>3</sub> of **22**

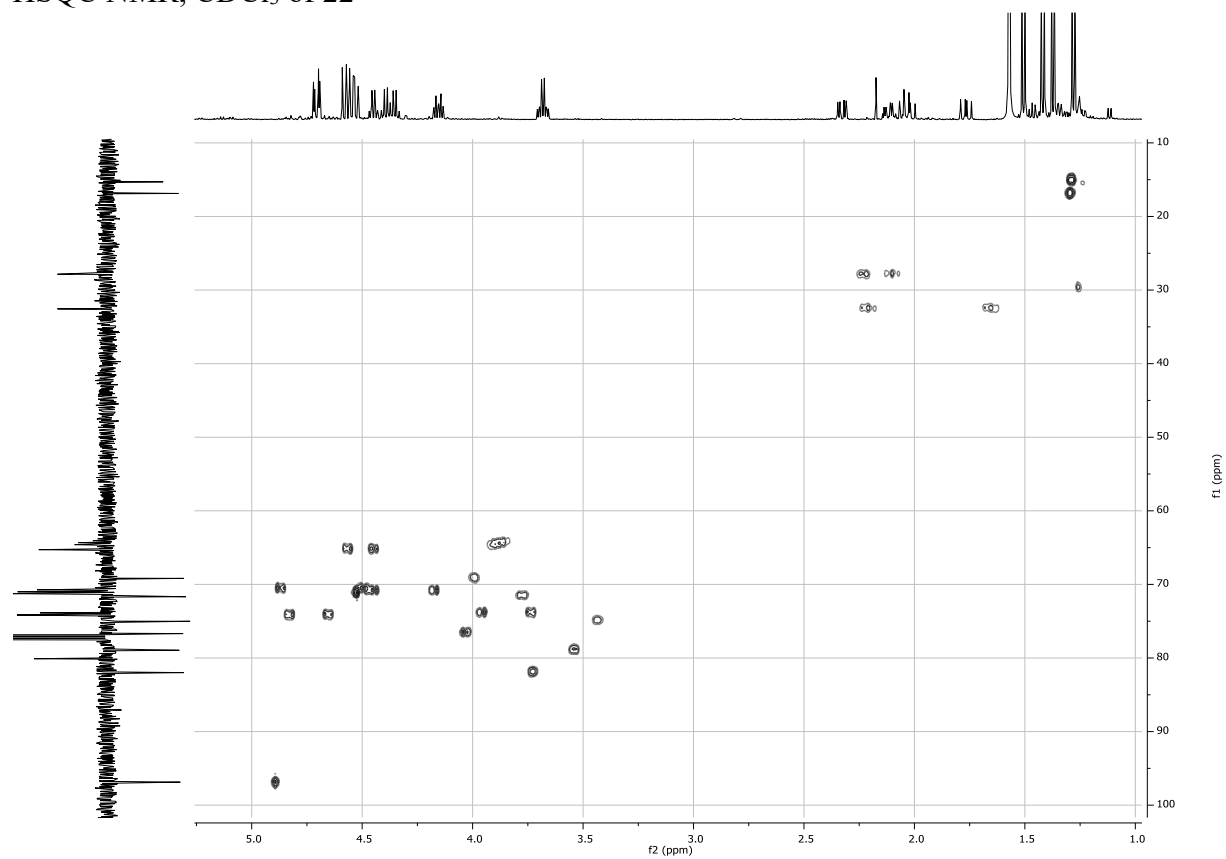



<sup>1</sup>H NMR, 500 MHz, CDCl<sub>3</sub> of 4

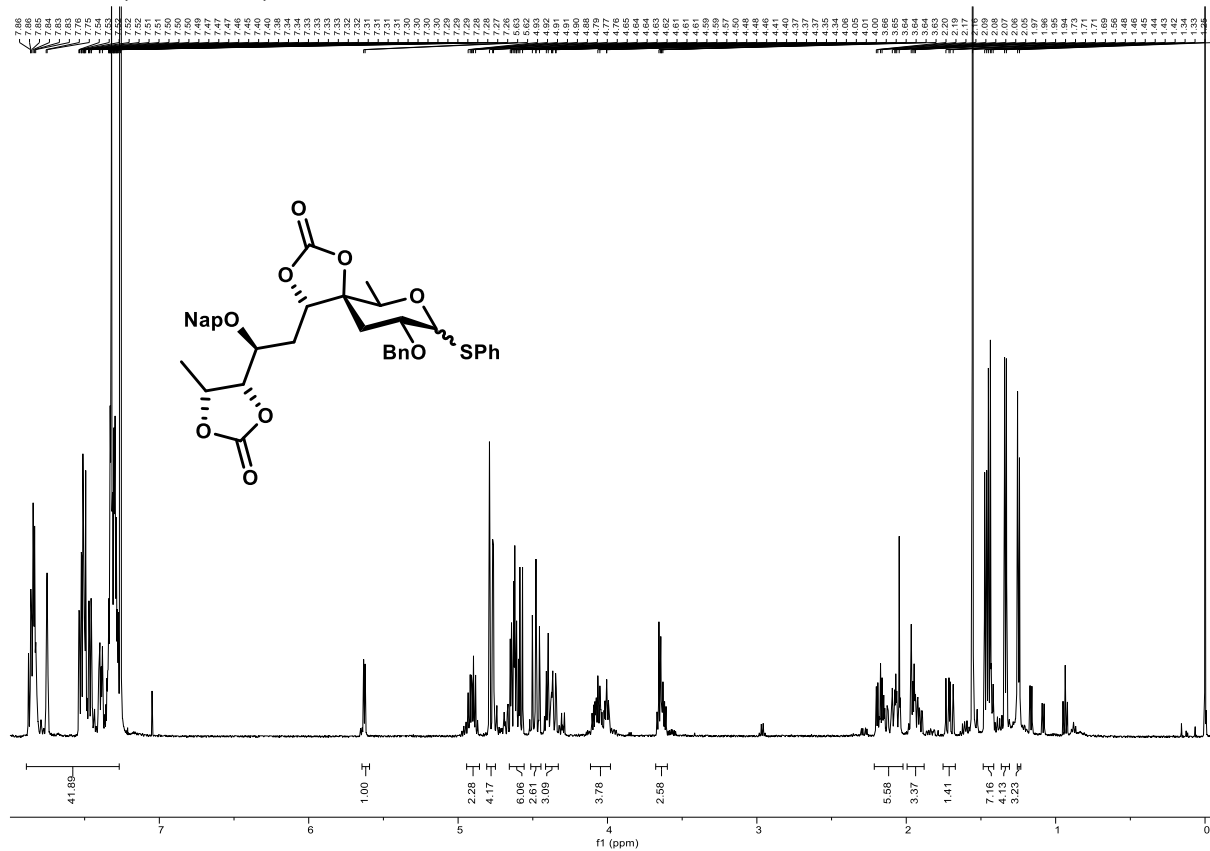

<sup>13</sup>C NMR, 126 MHz, CDCl<sub>3</sub> of 4

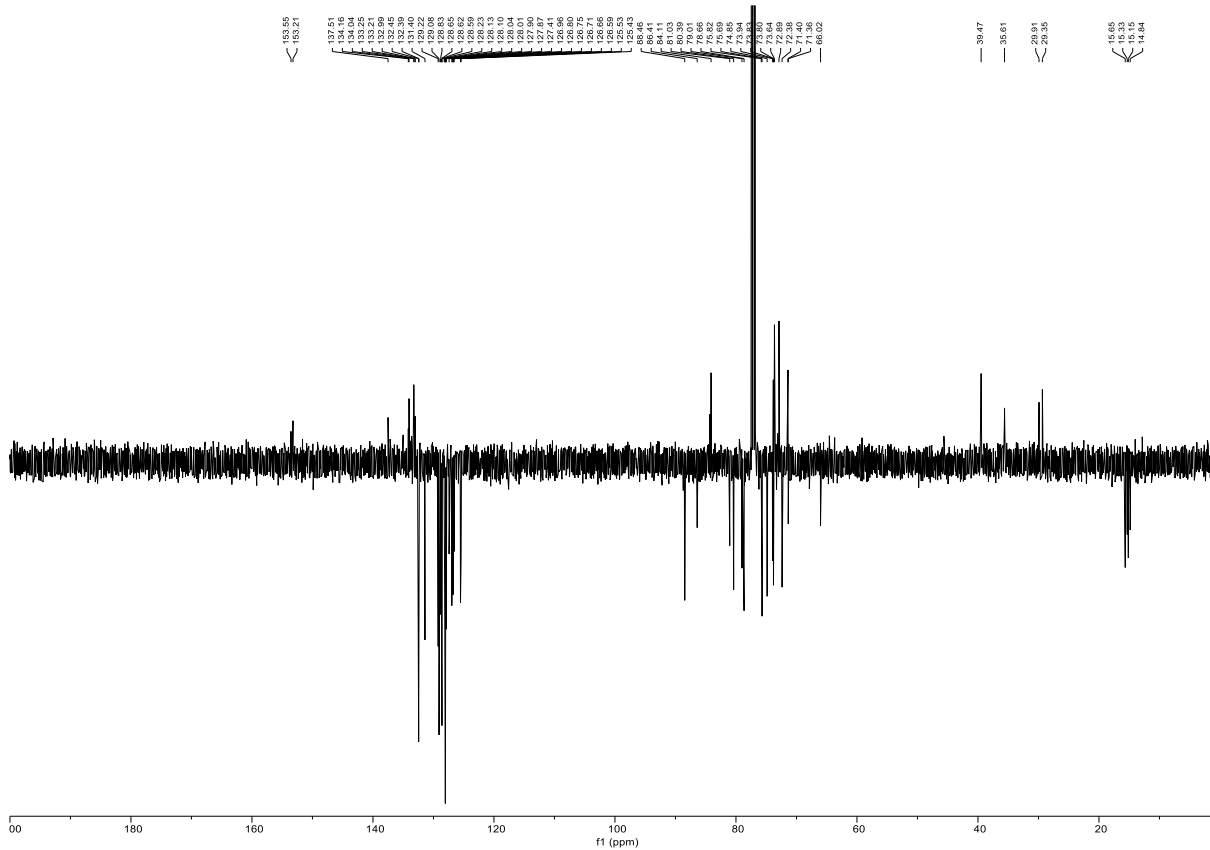

HH-COSY NMR, CDCl<sub>3</sub> of 4

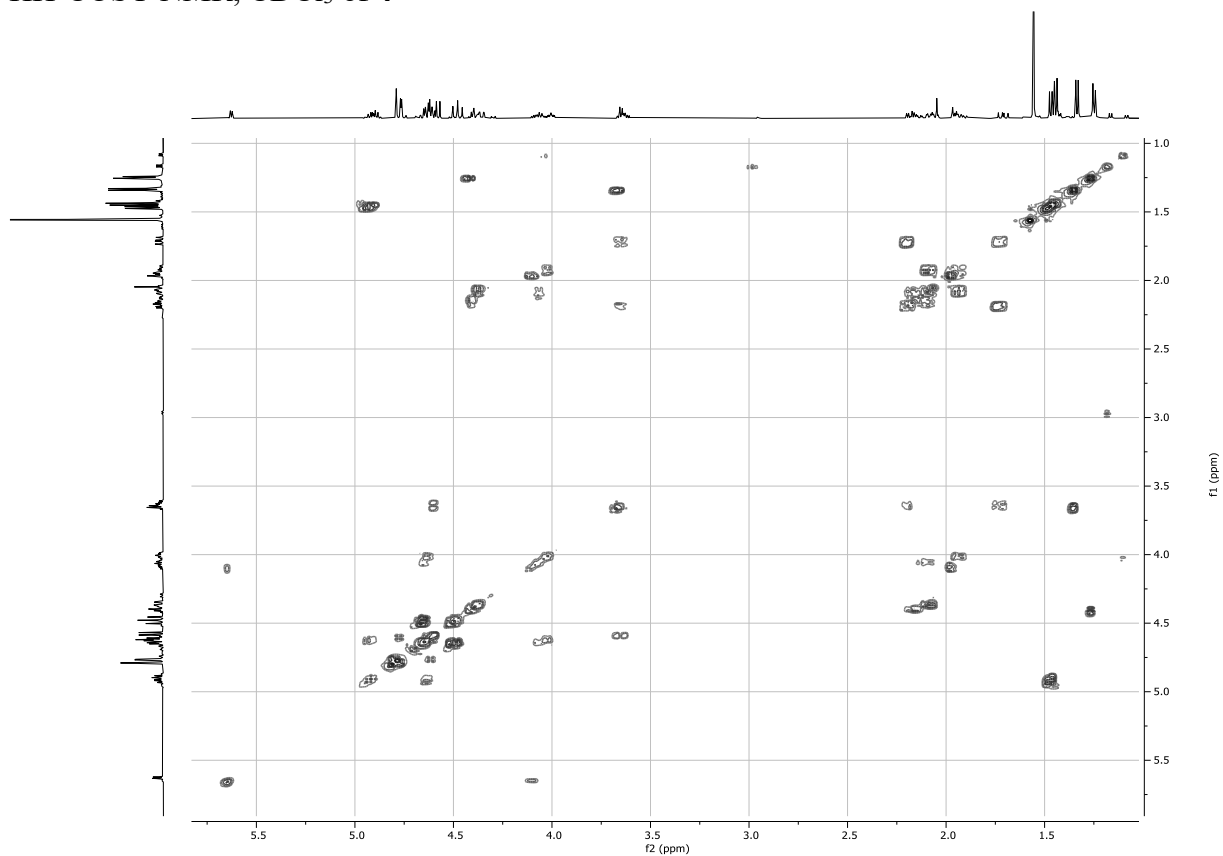

HSQC NMR, CDCl<sub>3</sub> of 4

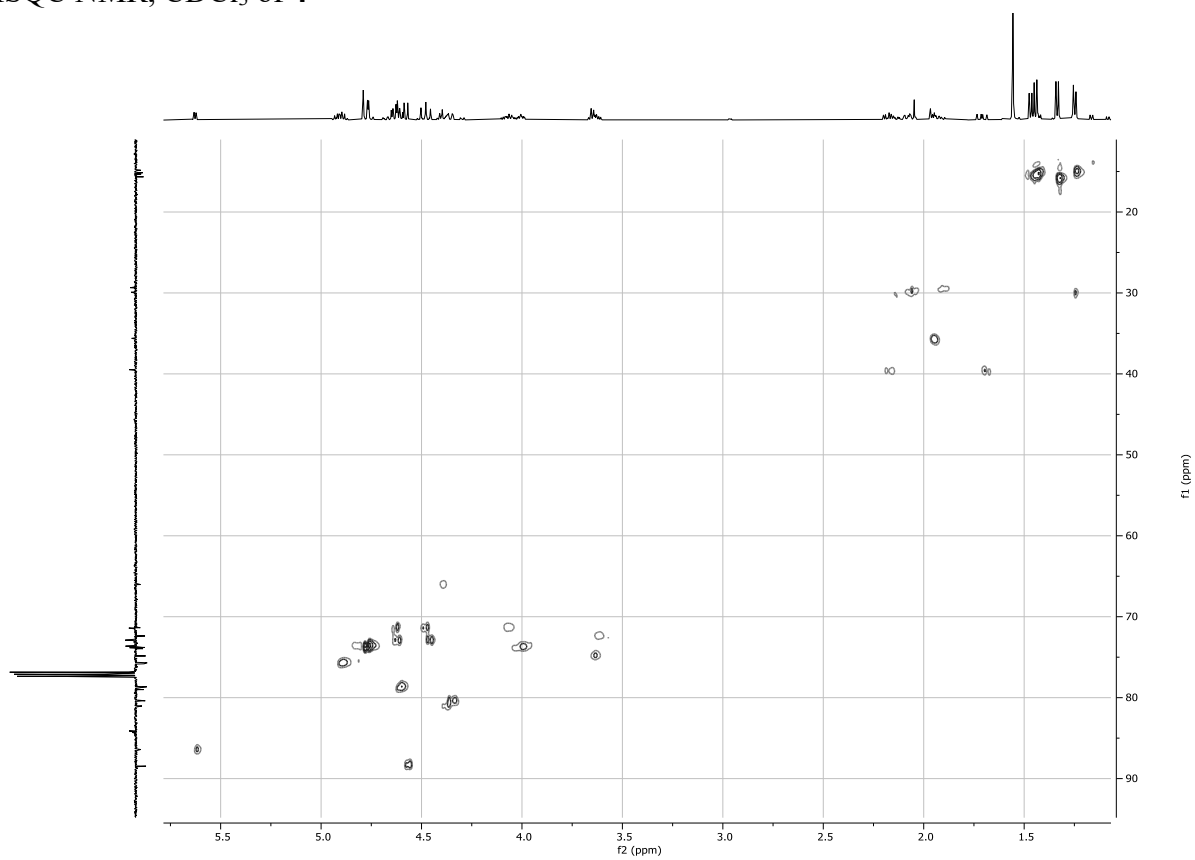



HH-COSY NMR, CDCl<sub>3</sub> of S51

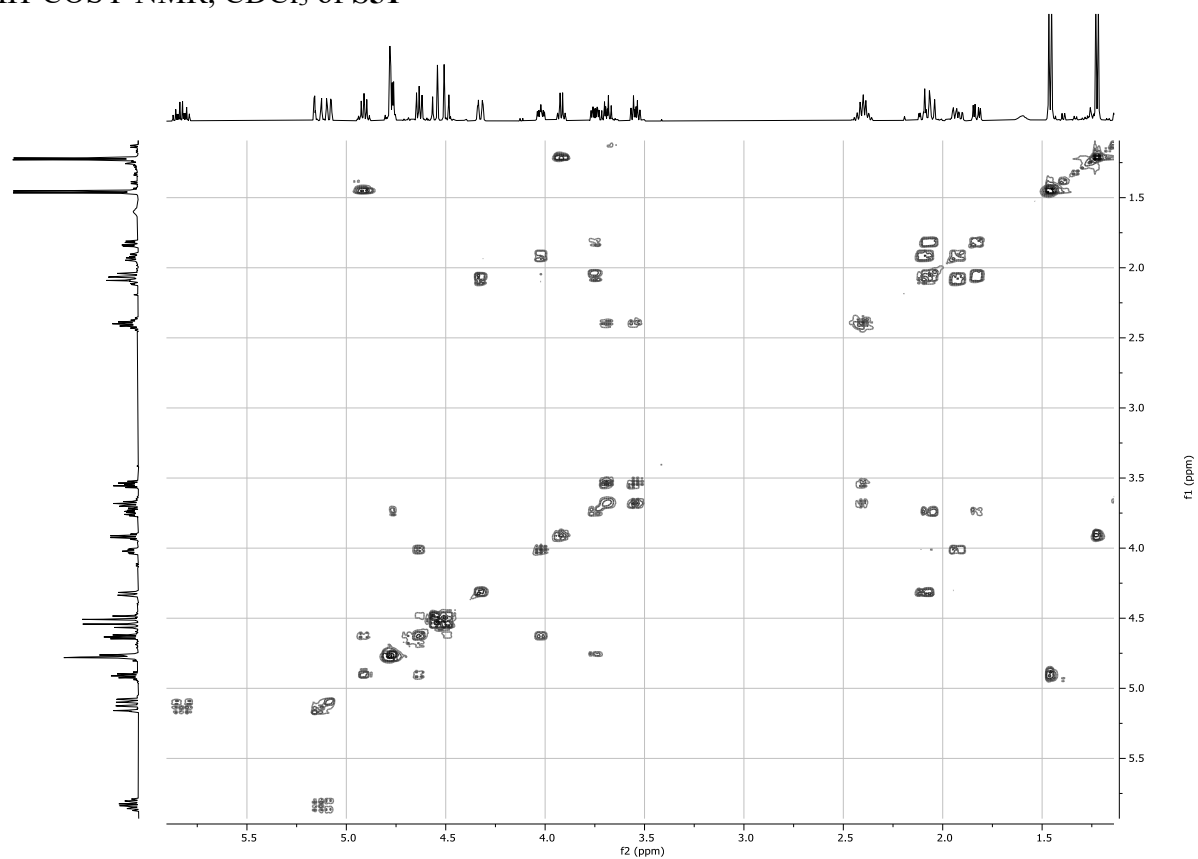

HSQC NMR, CDCl<sub>3</sub> of S51

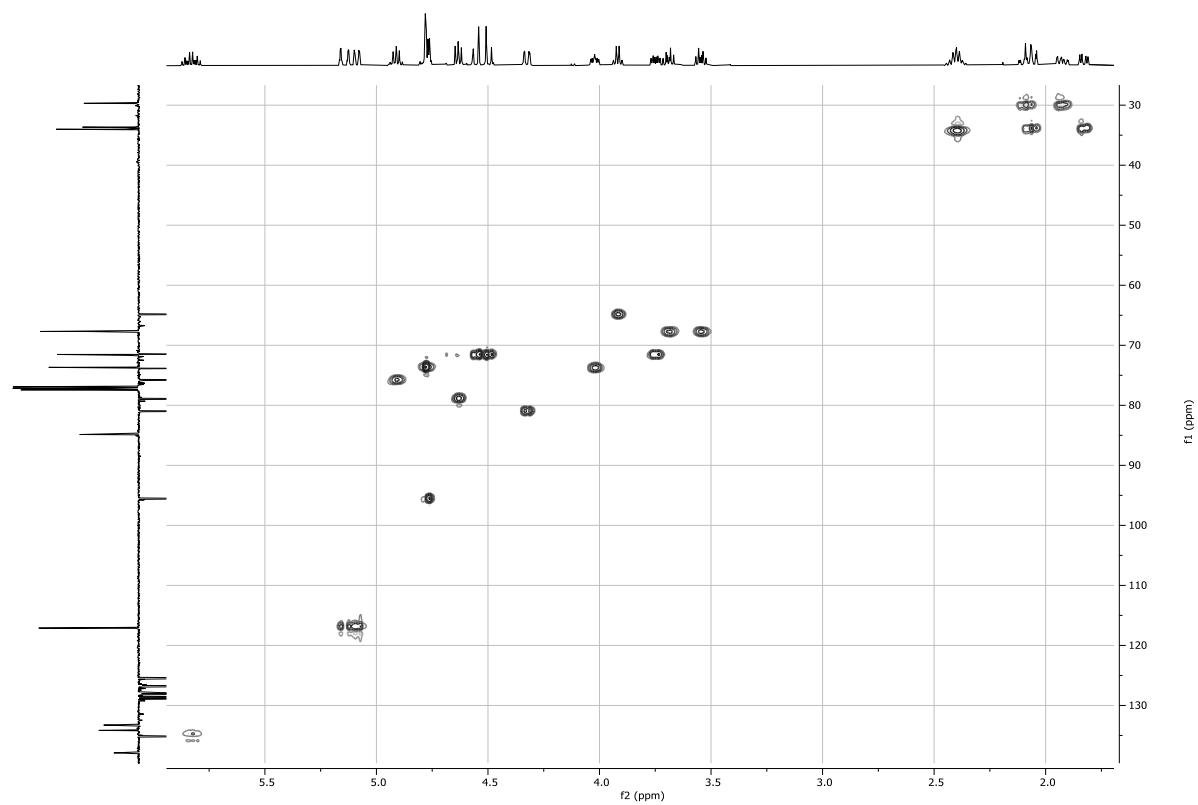

HMBC NMR, CDCl<sub>3</sub> of **S51**

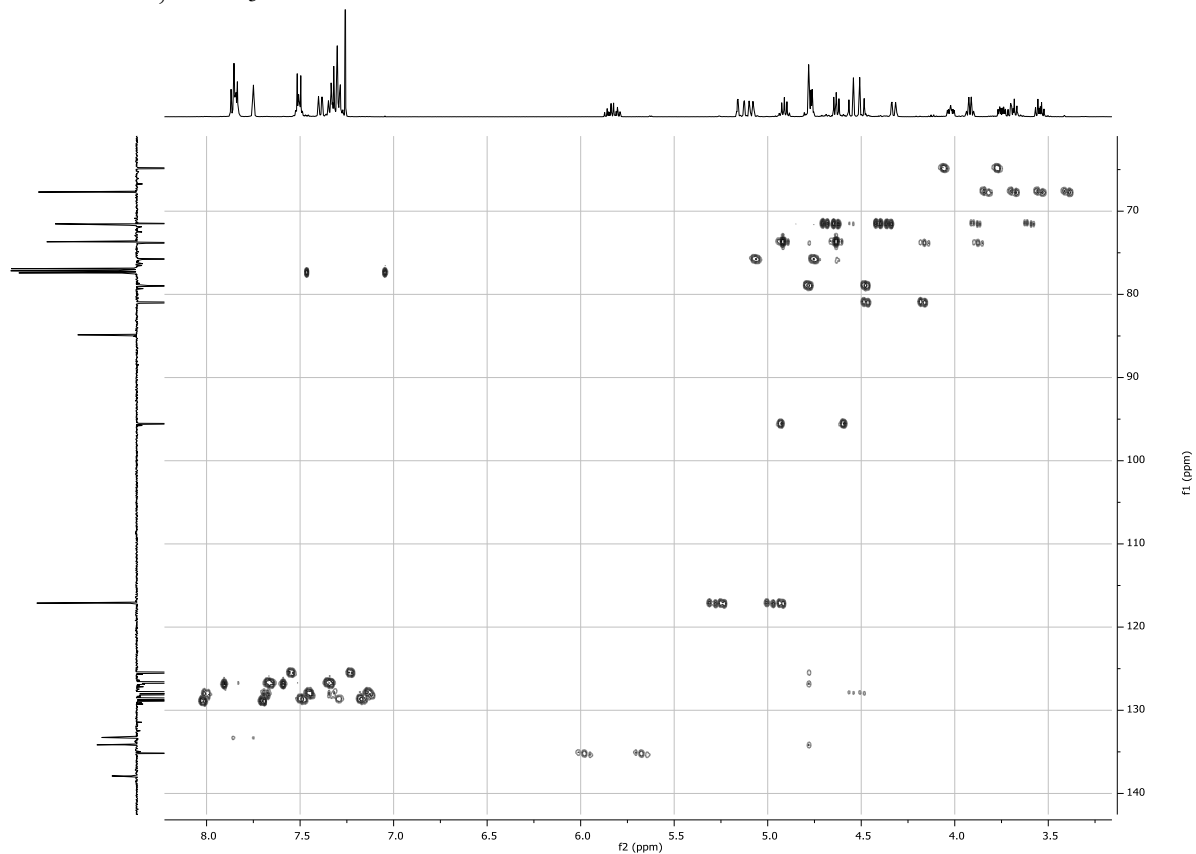

<sup>1</sup>H NMR, 400 MHz, CDCl<sub>3</sub> of **S1**

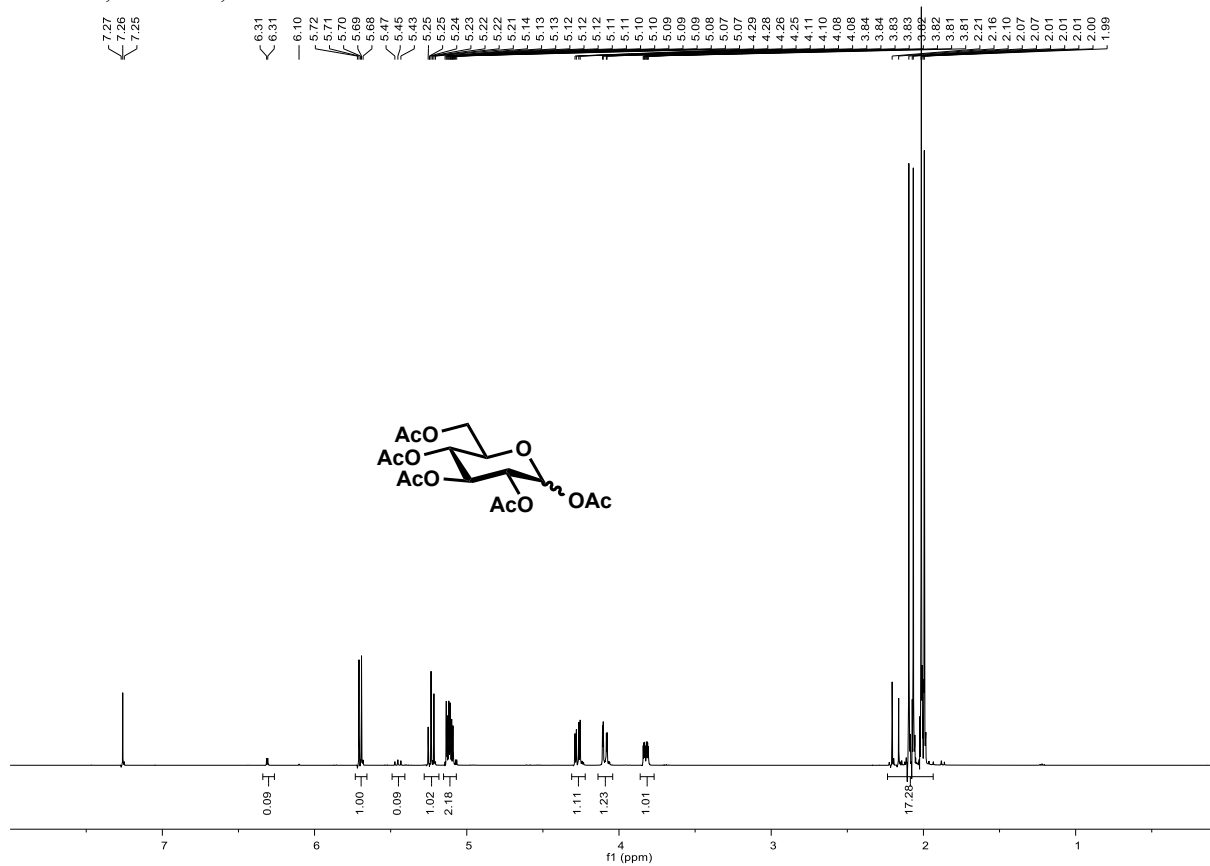

$^{13}\text{C}$  NMR, 101 MHz,  $\text{CDCl}_3$  of S1

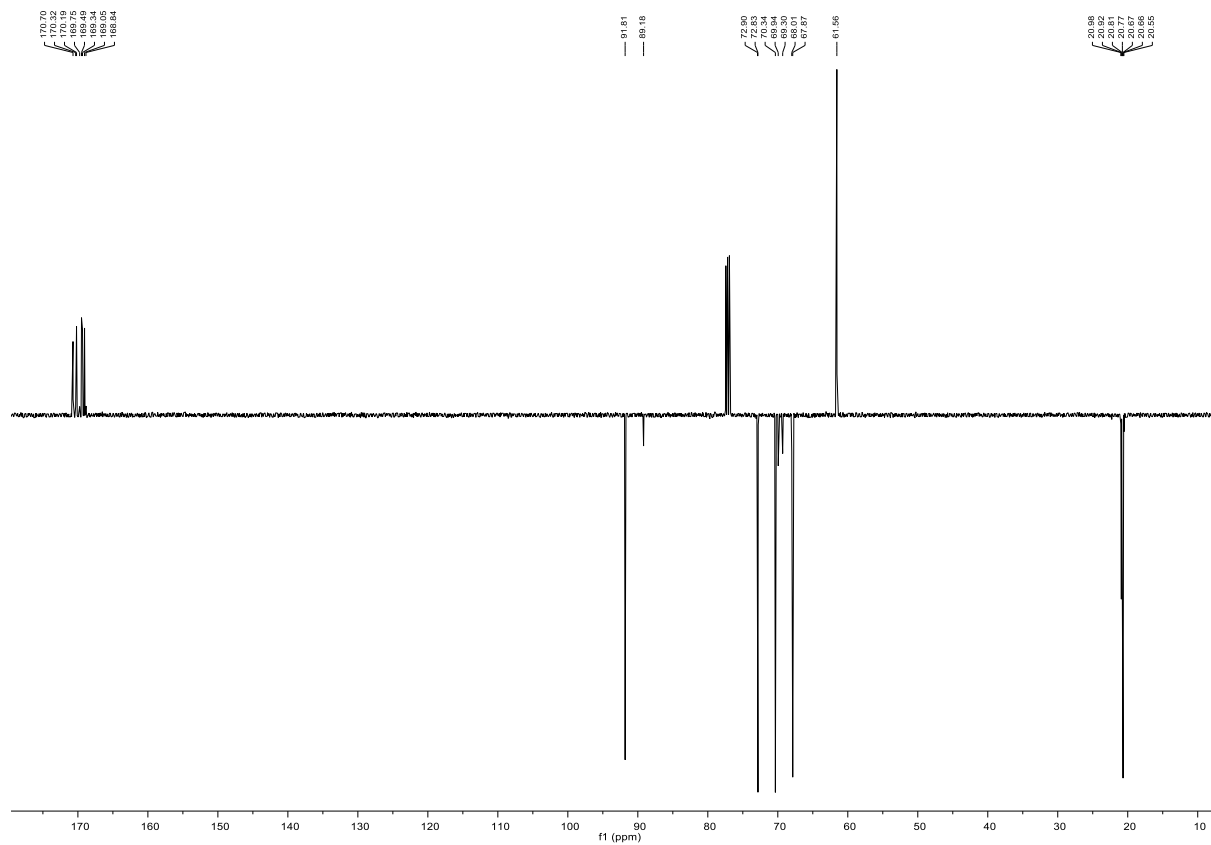

HH-COSY NMR,  $\text{CDCl}_3$  of S1

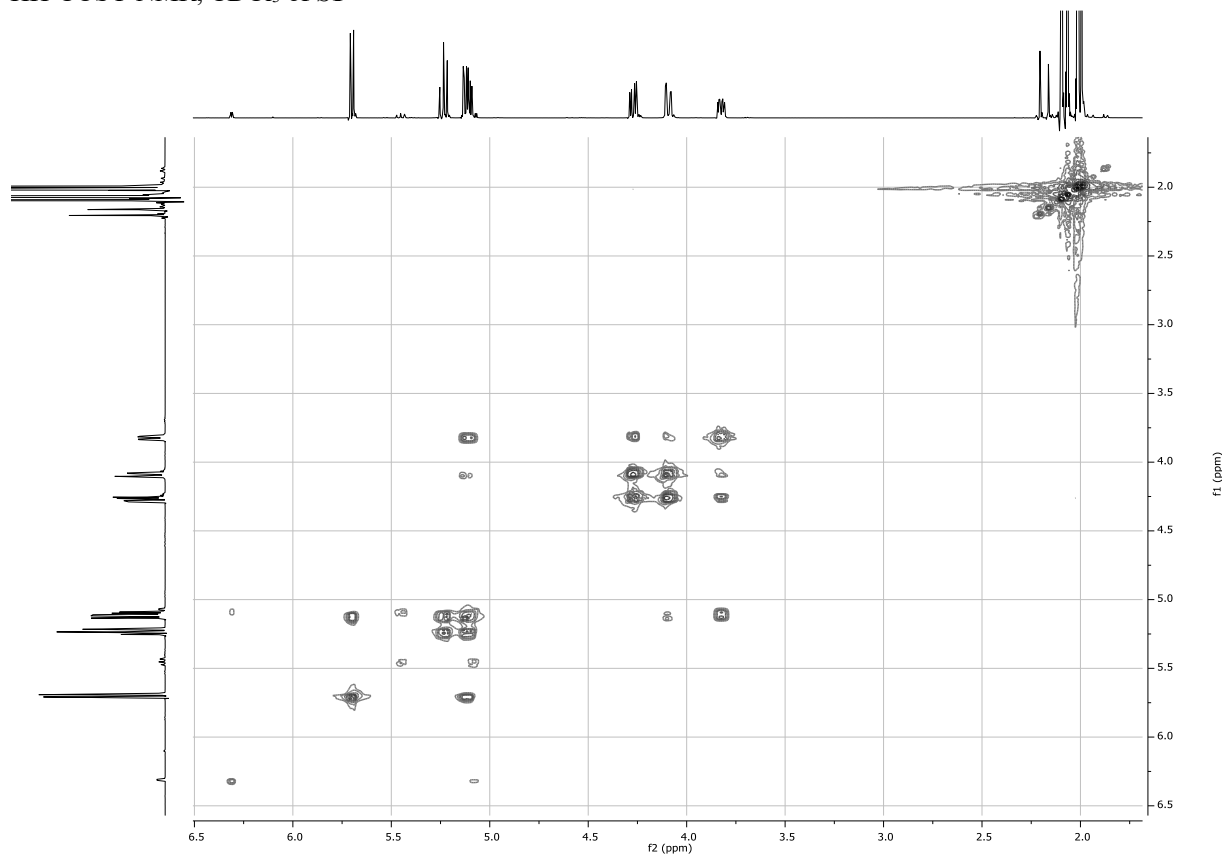

HSQC NMR, CDCl<sub>3</sub> of S1

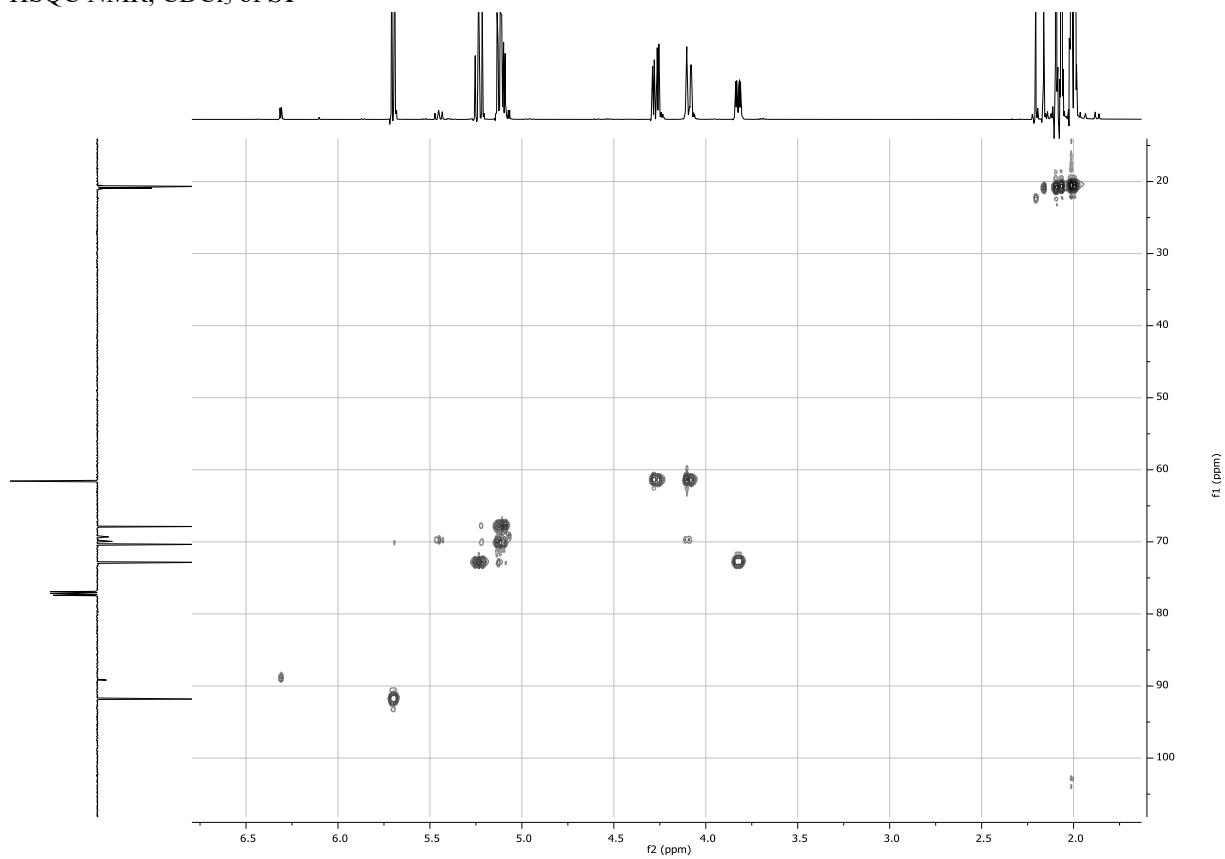

<sup>1</sup>H NMR, 400 MHz, CDCl<sub>3</sub> of S2

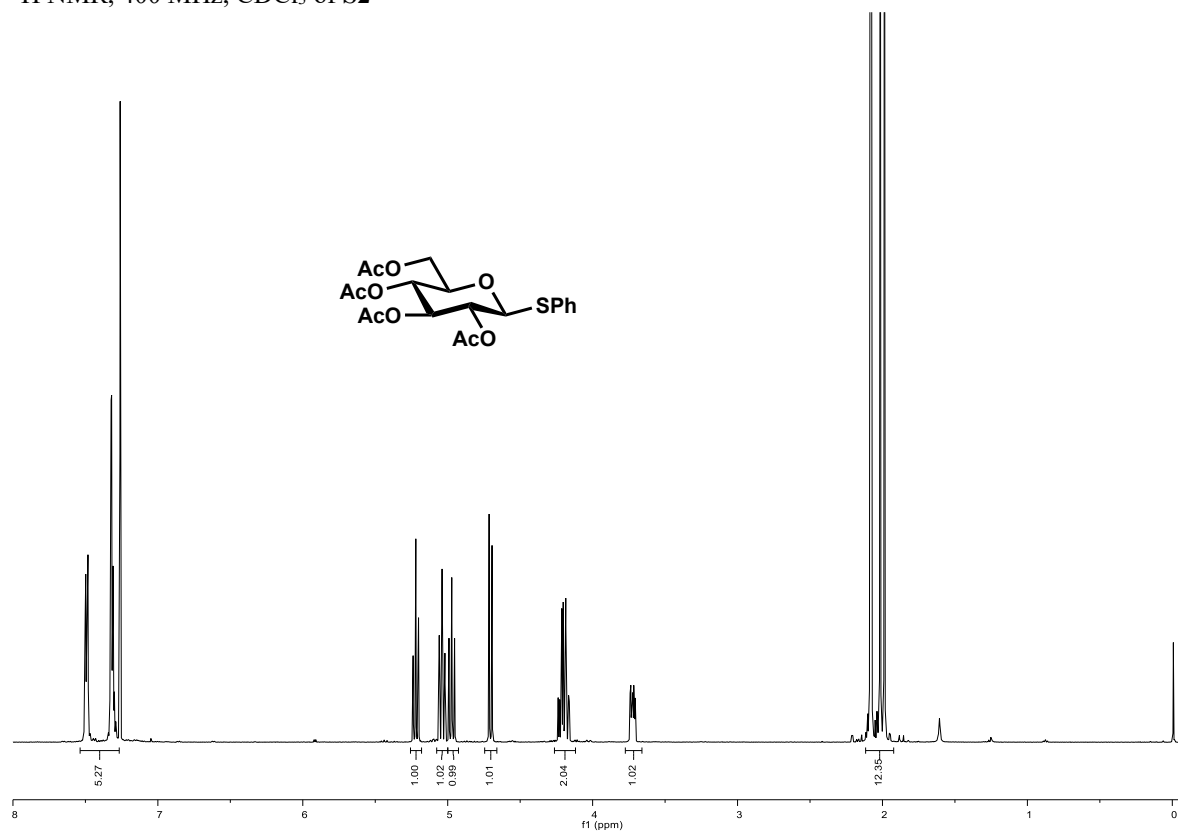

<sup>13</sup>C NMR, 101 MHz, CDCl<sub>3</sub> of S2

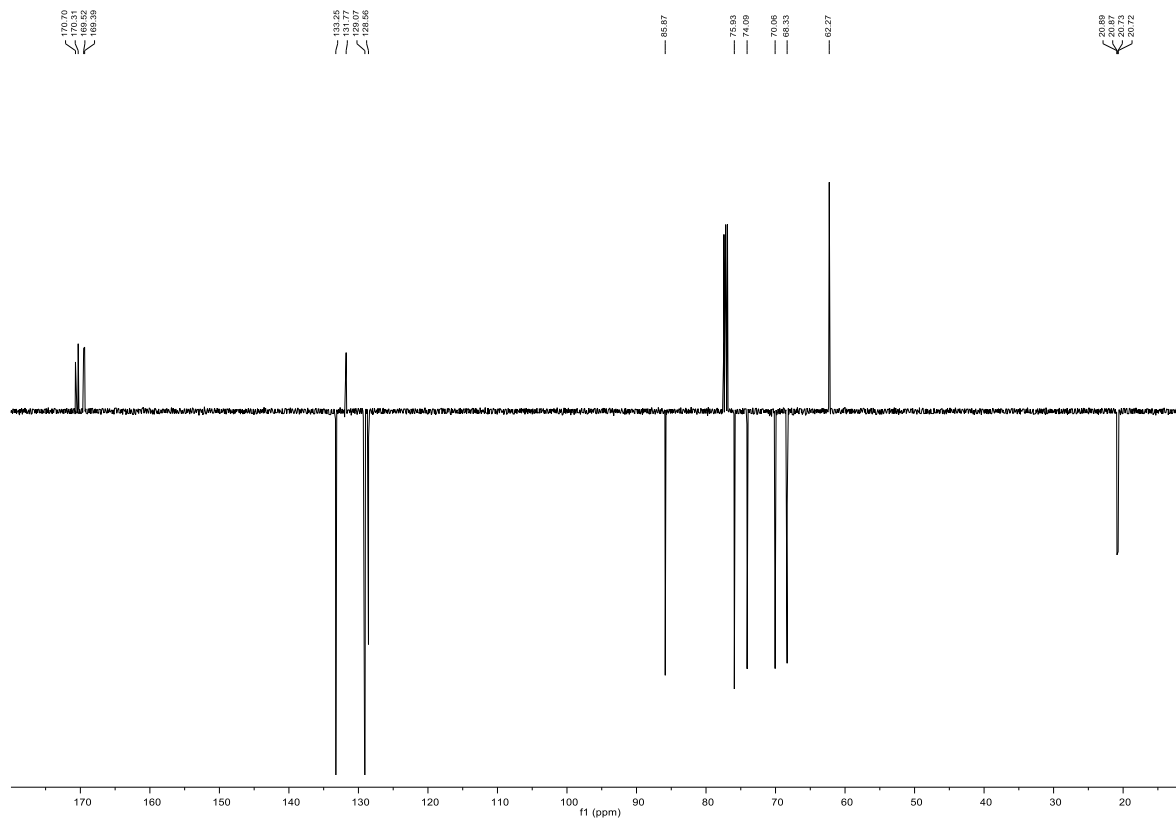

HH-COSY NMR, CDCl<sub>3</sub> of S2

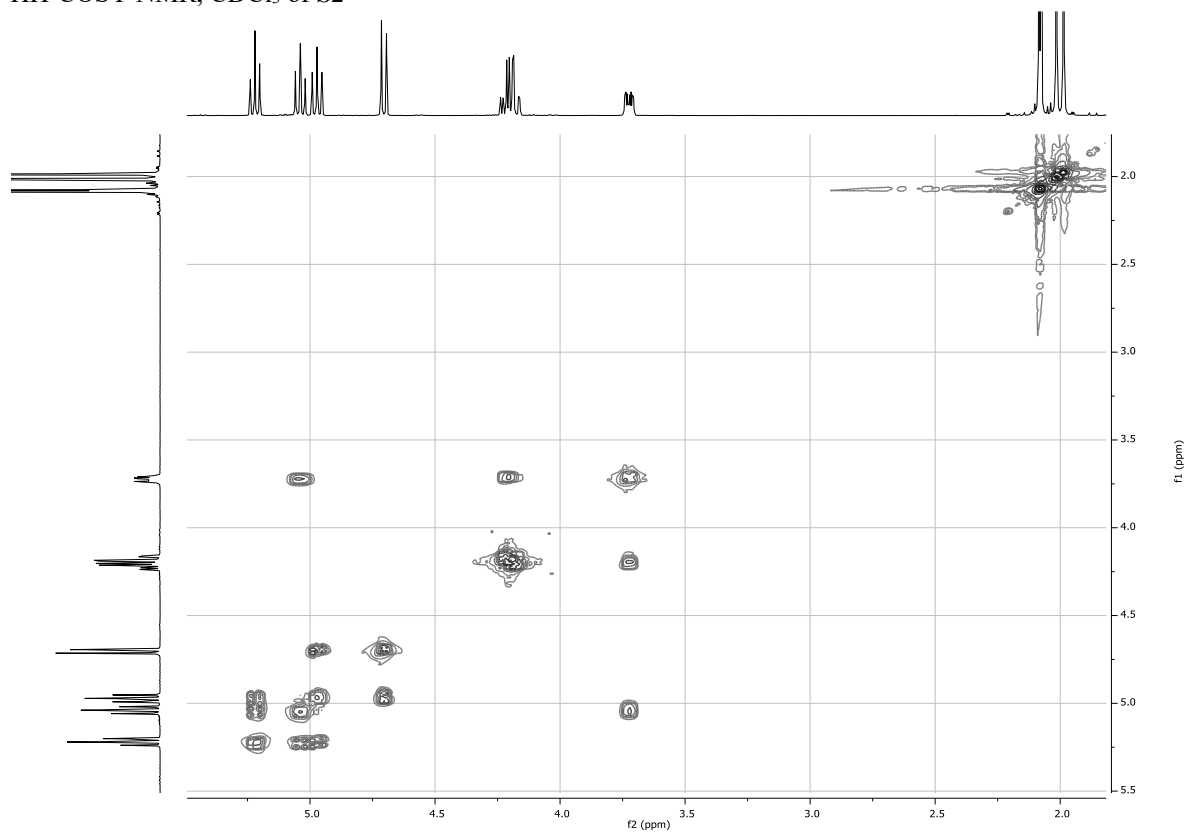



HSQC NMR, CDCl<sub>3</sub> of S2

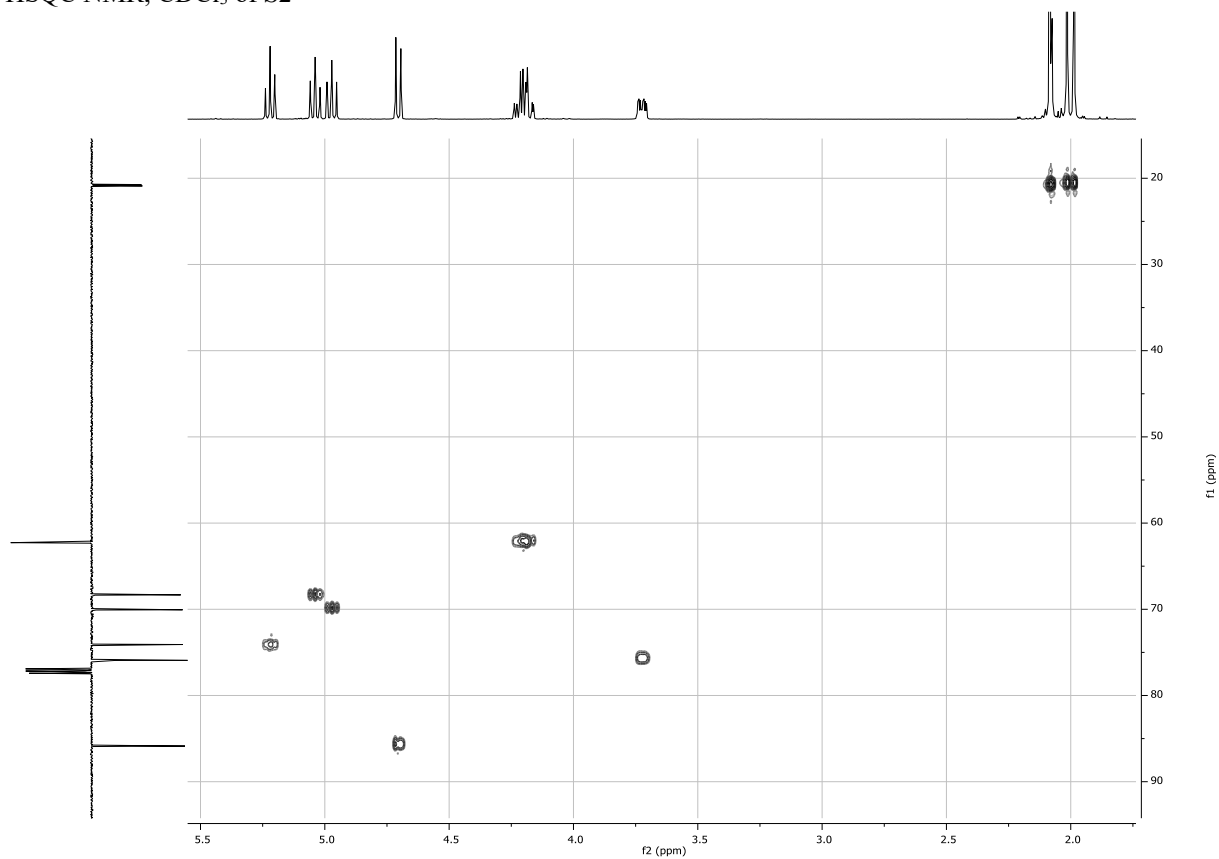

<sup>1</sup>H NMR, 400 MHz, CDCl<sub>3</sub> of S3

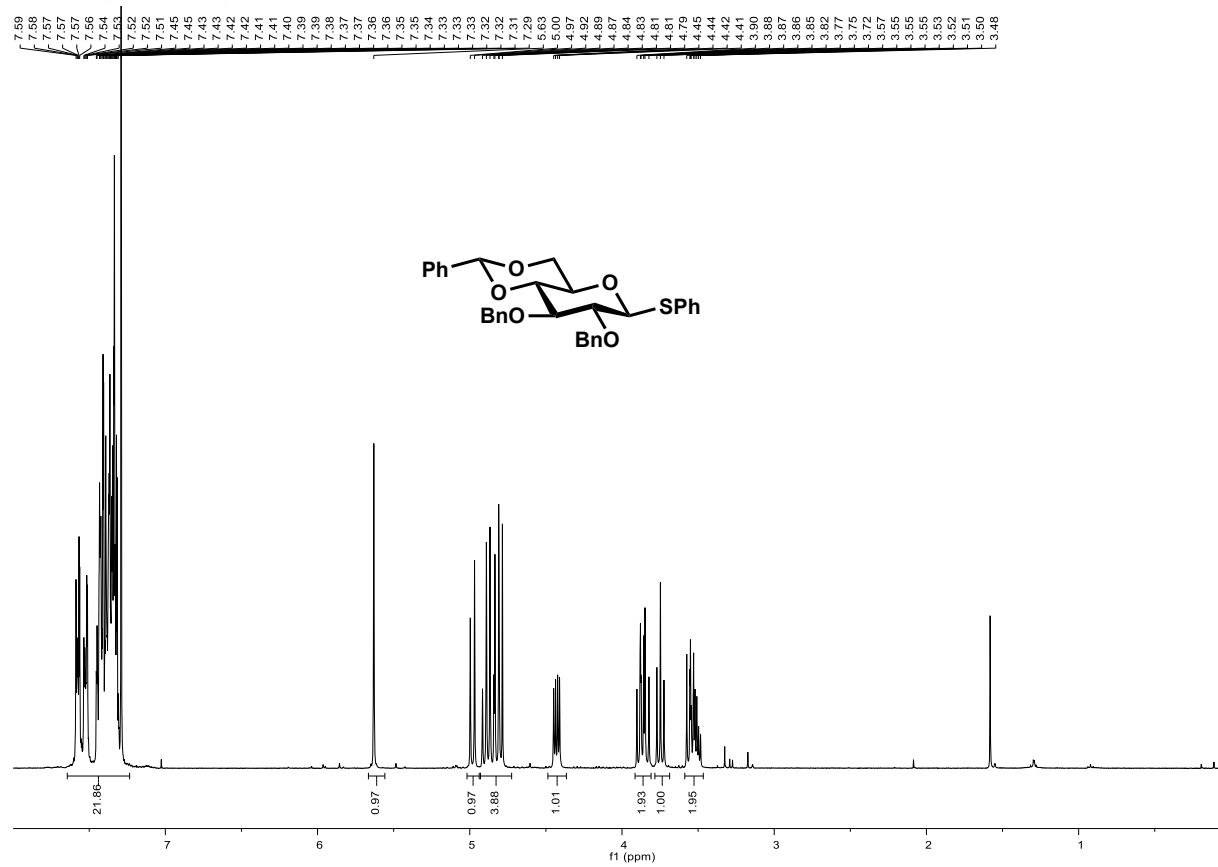

<sup>13</sup>C NMR, 101 MHz, CDCl<sub>3</sub> of S3

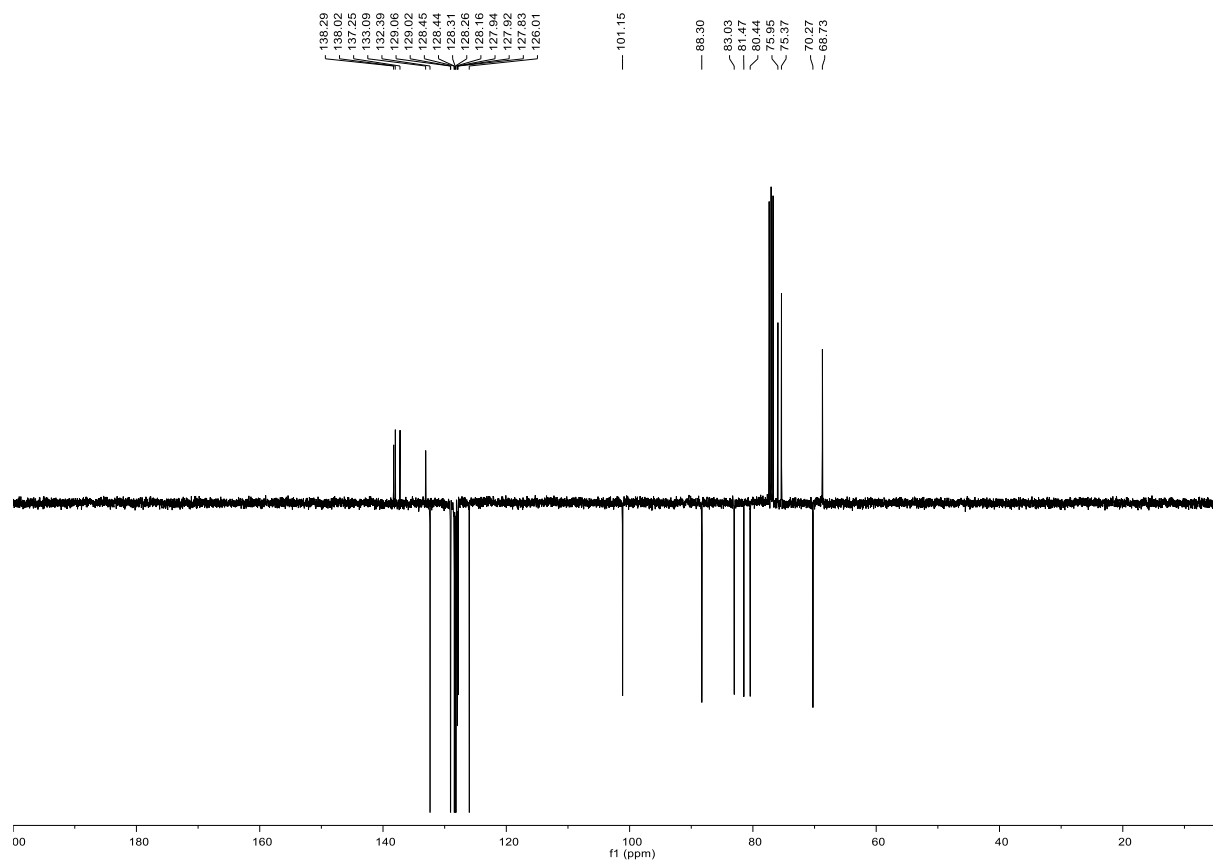

HH-COSY NMR, CDCl<sub>3</sub> of S3

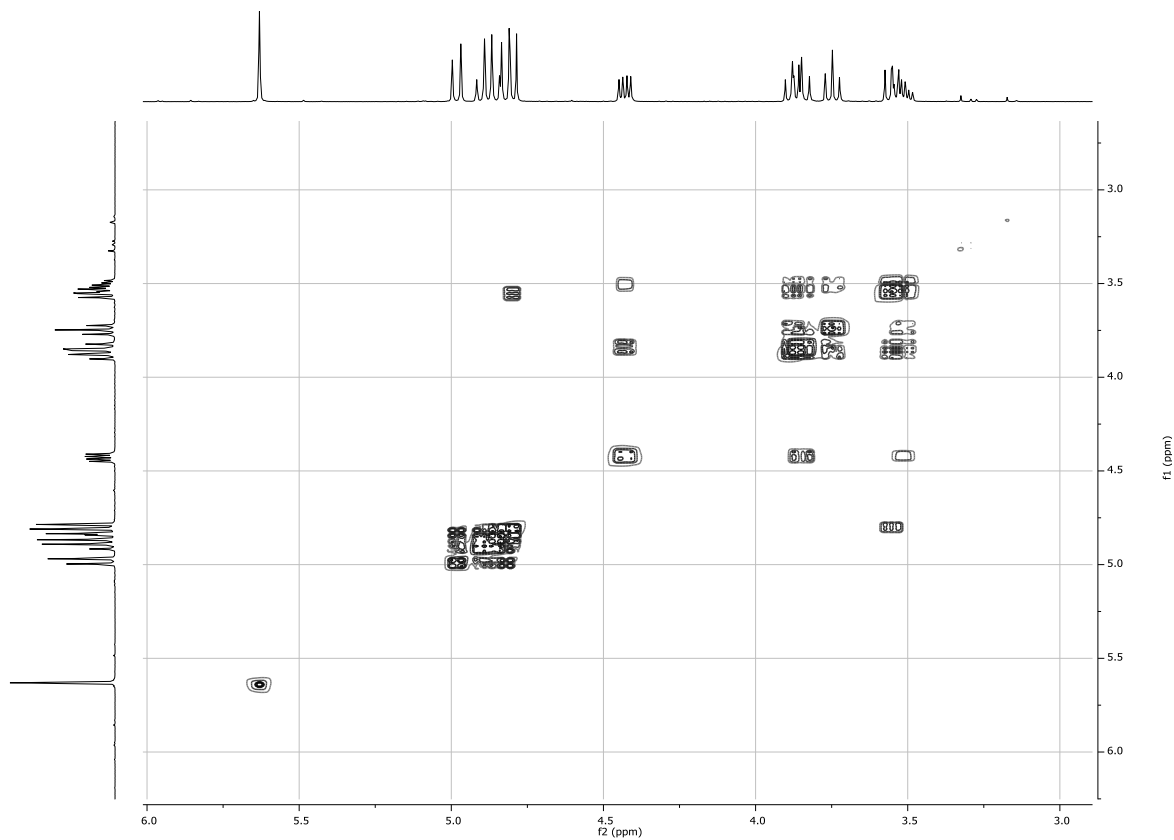

HSQC NMR, CDCl<sub>3</sub> of S3

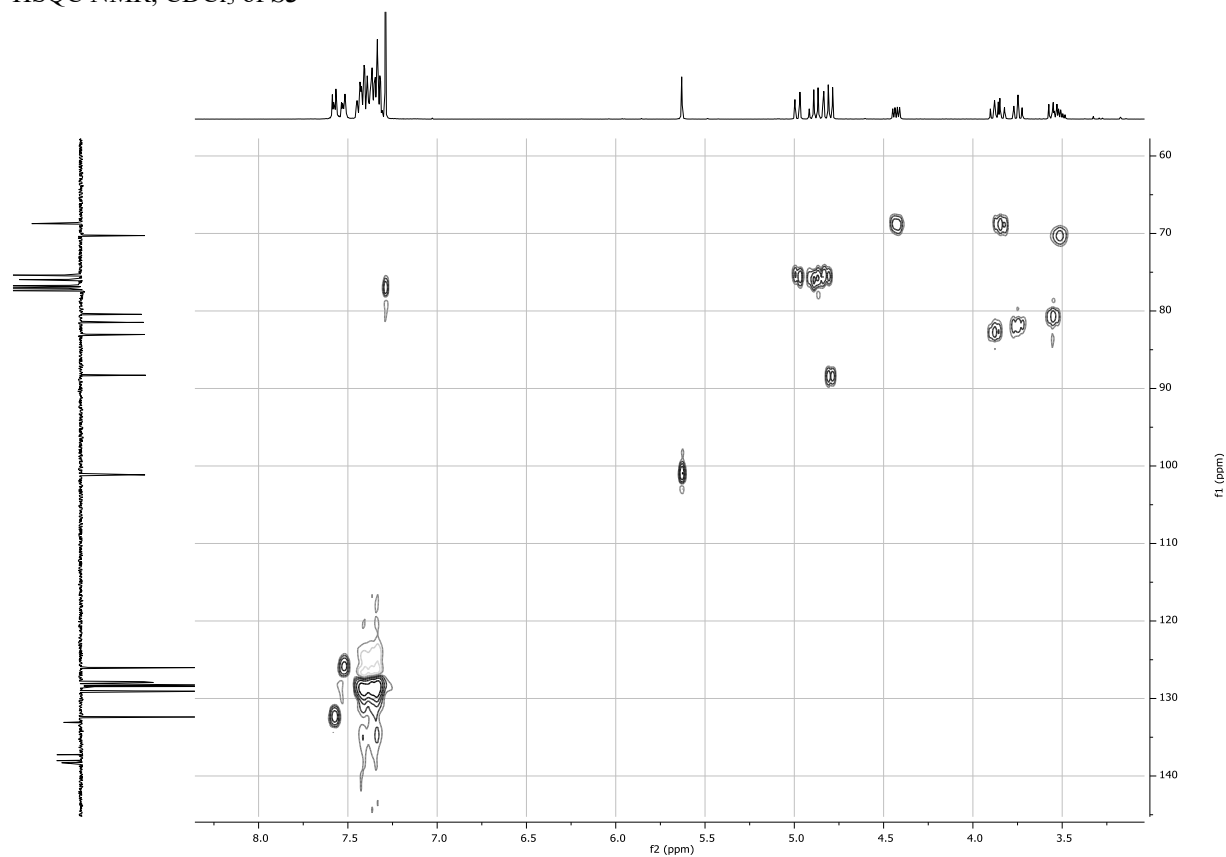

<sup>1</sup>H NMR, 400 MHz, CDCl<sub>3</sub> of S4

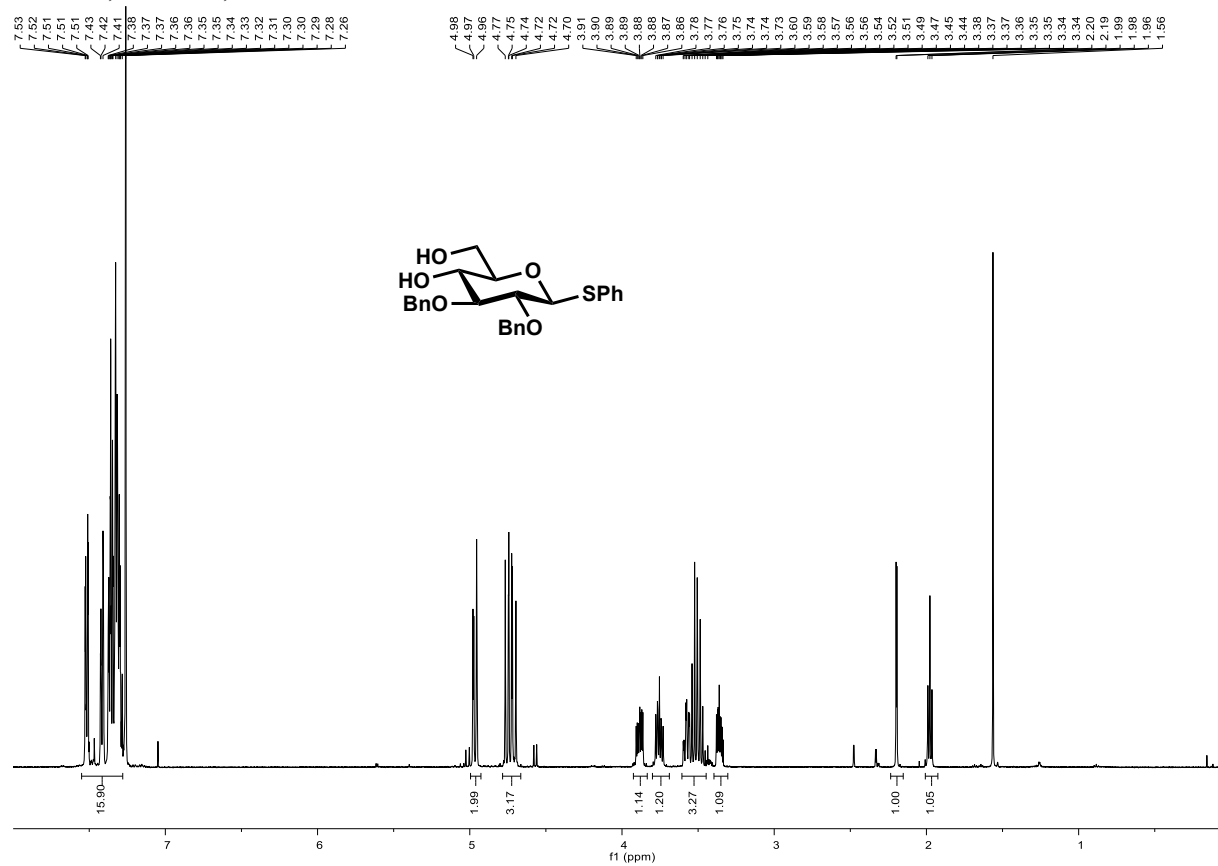

<sup>13</sup>C NMR, 101 MHz, CDCl<sub>3</sub> of S4

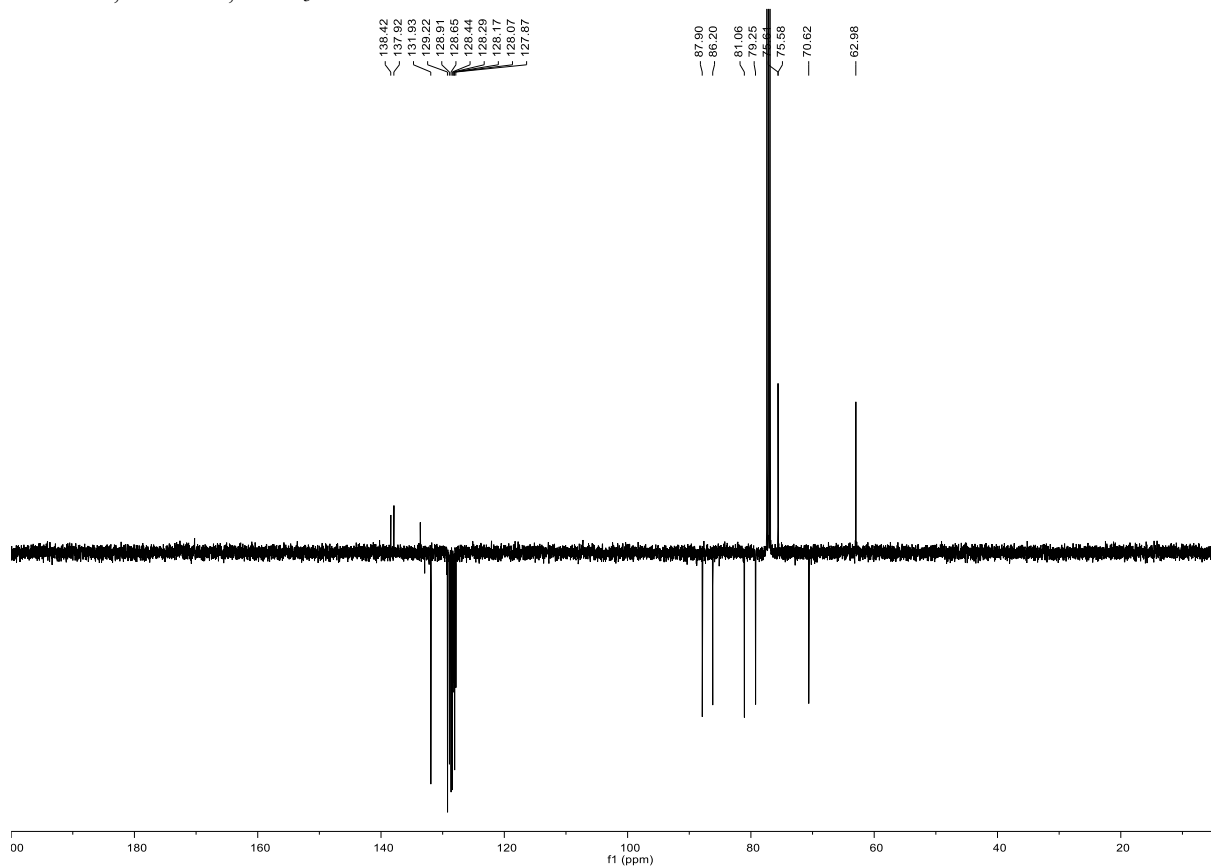

HH-COSY NMR, CDCl<sub>3</sub> of S4

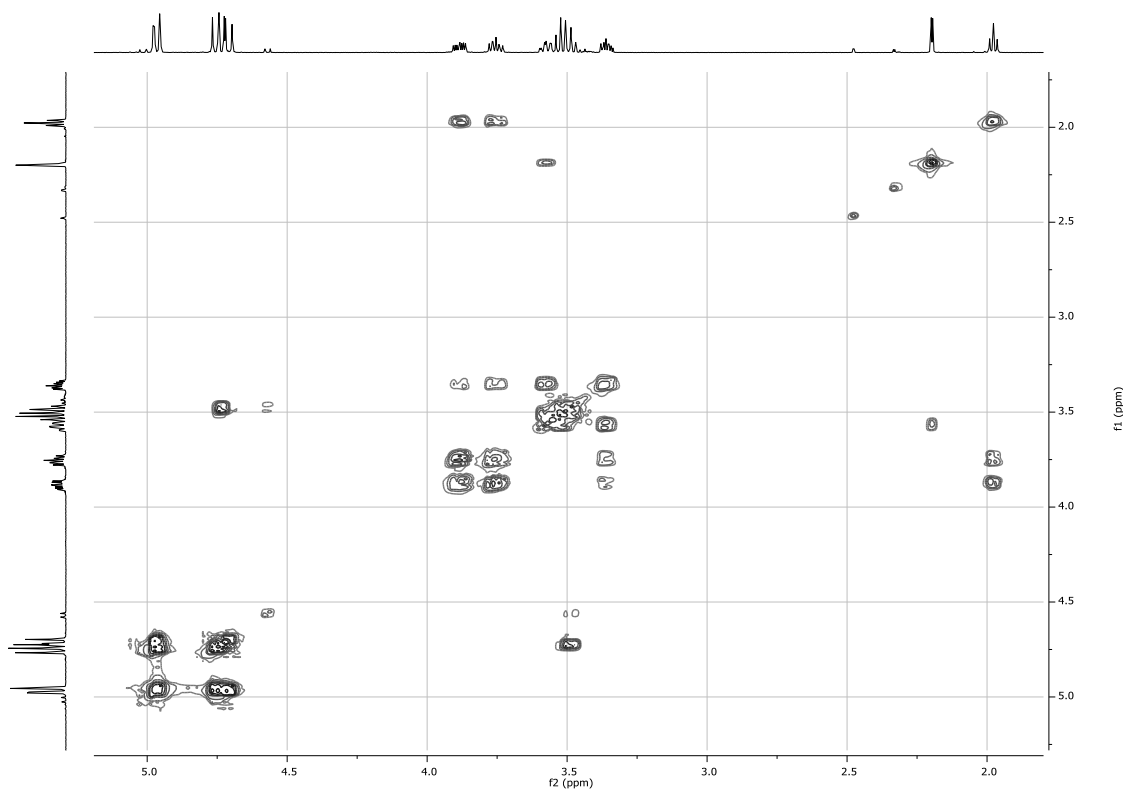



$^{13}\text{C}$  NMR, 101 MHz,  $\text{CDCl}_3$  of **S5**

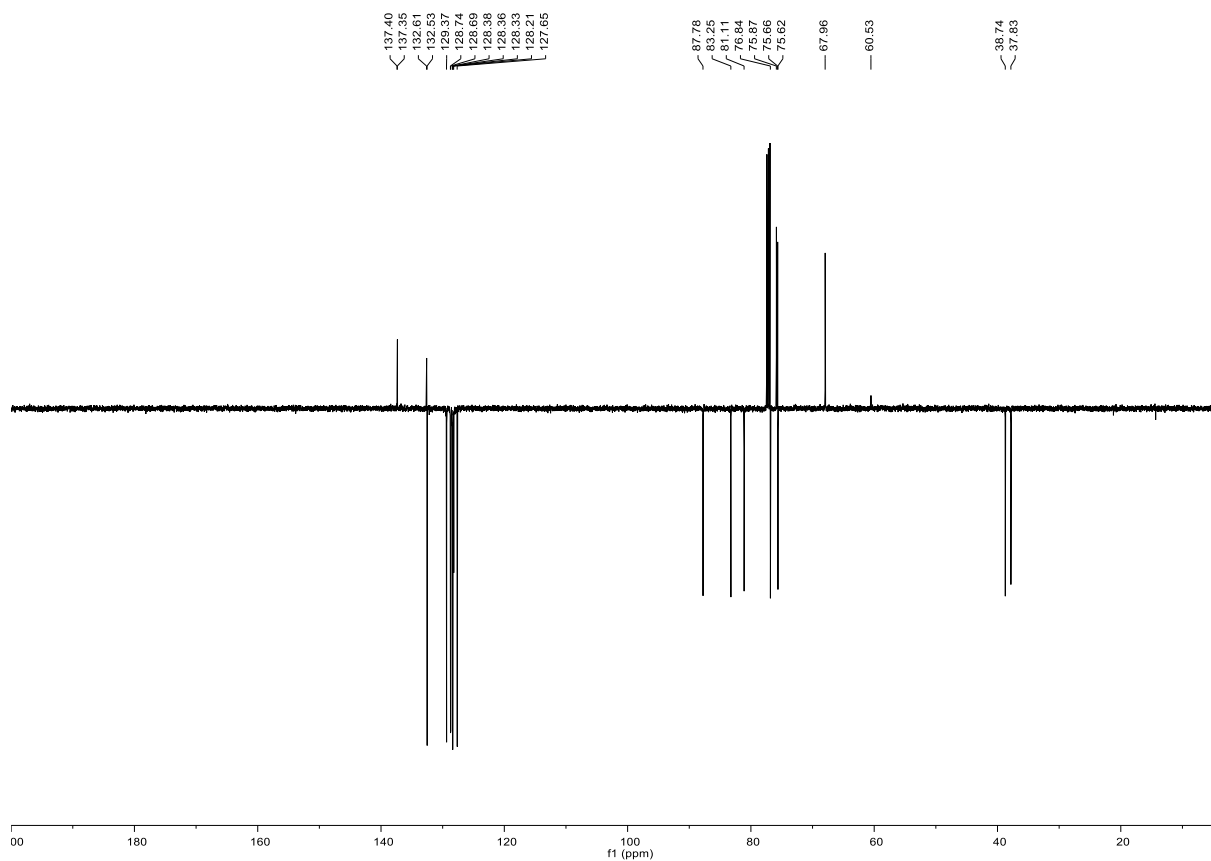

HH-COSY NMR,  $\text{CDCl}_3$  of **S5**

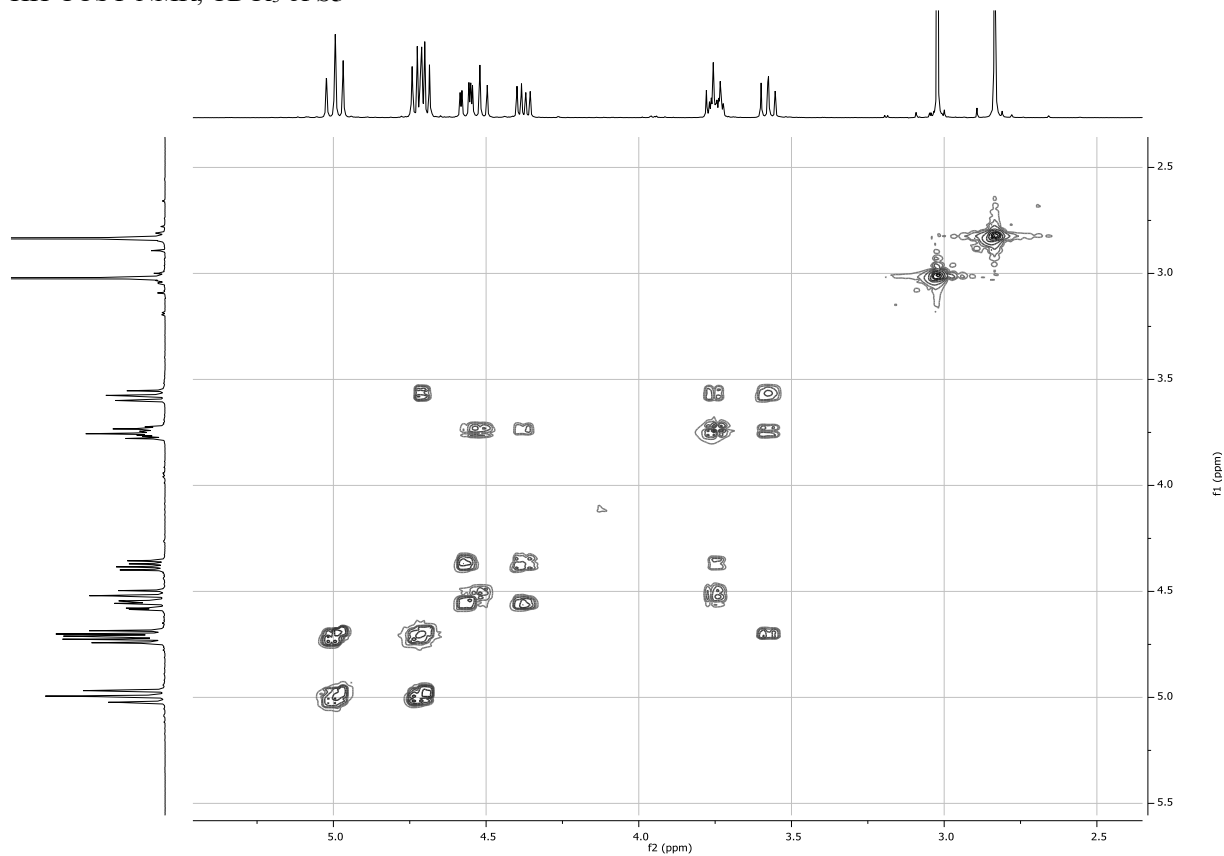

HSQC NMR, CDCl<sub>3</sub> of S5

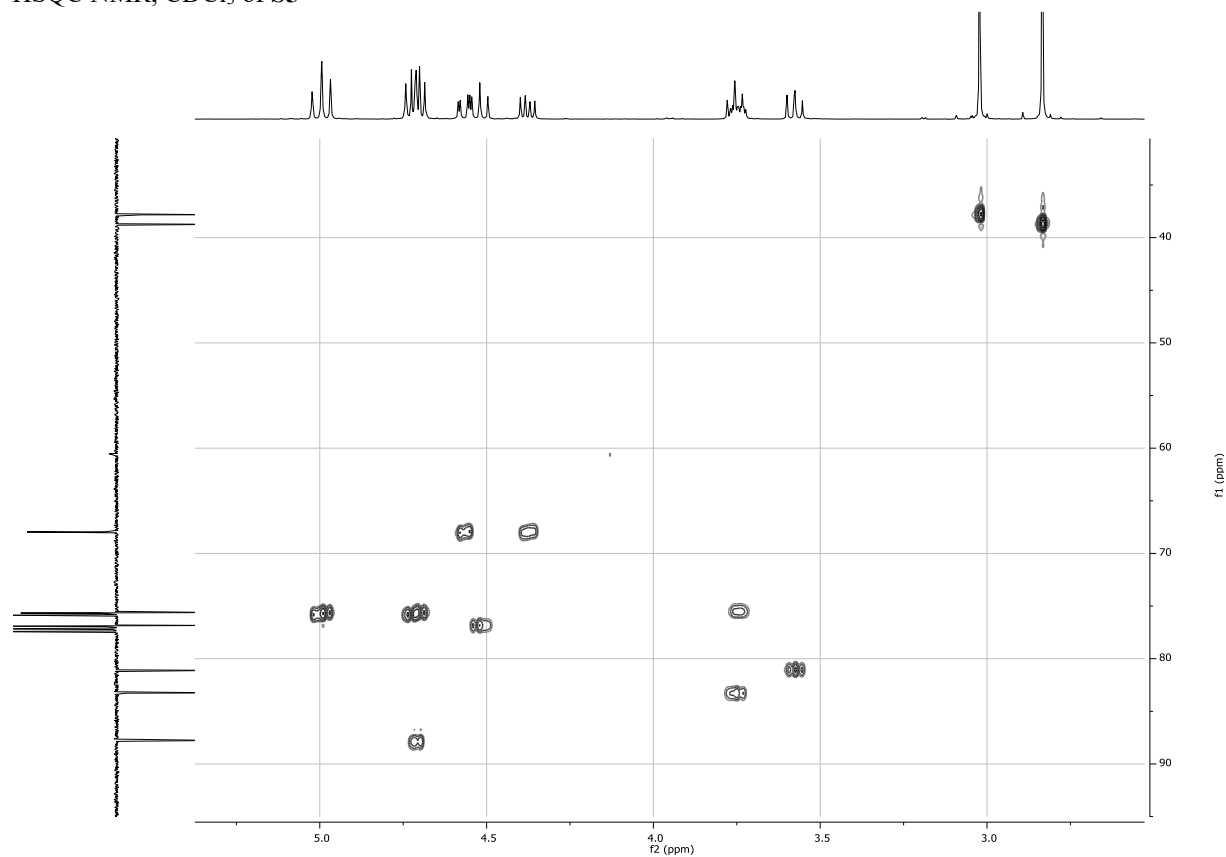

<sup>1</sup>H NMR, 400 MHz, CDCl<sub>3</sub> of S6

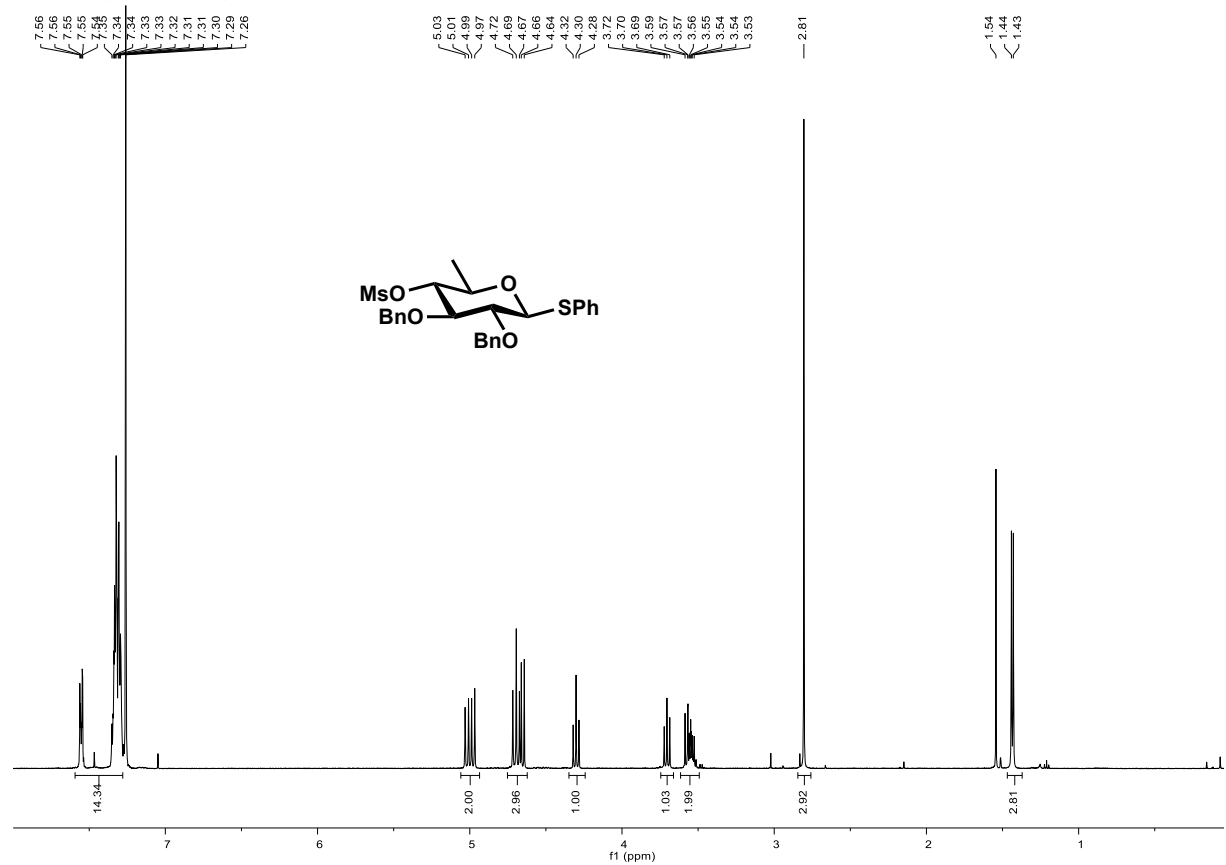

<sup>13</sup>C NMR, 101 MHz, CDCl<sub>3</sub> of S6

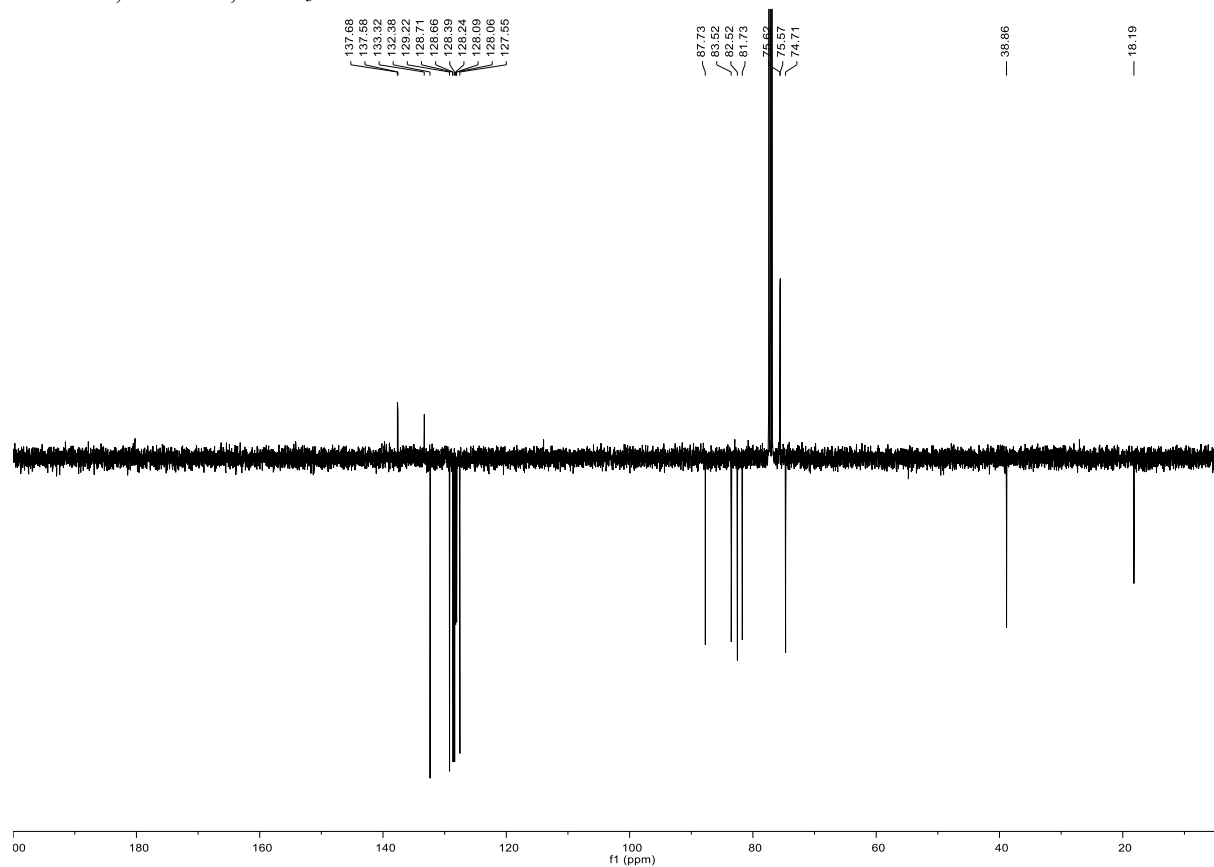

HH-COSY NMR, CDCl<sub>3</sub> of S6

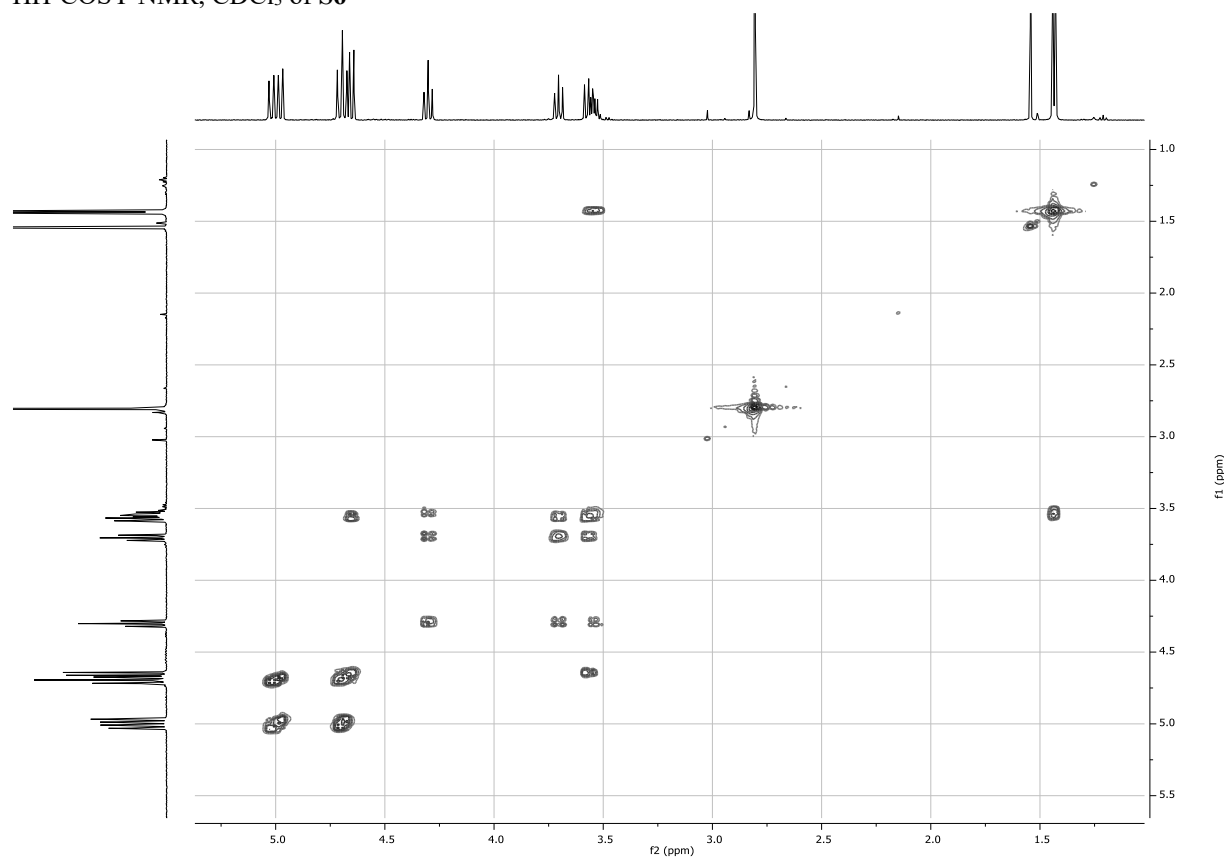



HSQC NMR, CDCl<sub>3</sub> of **S6**

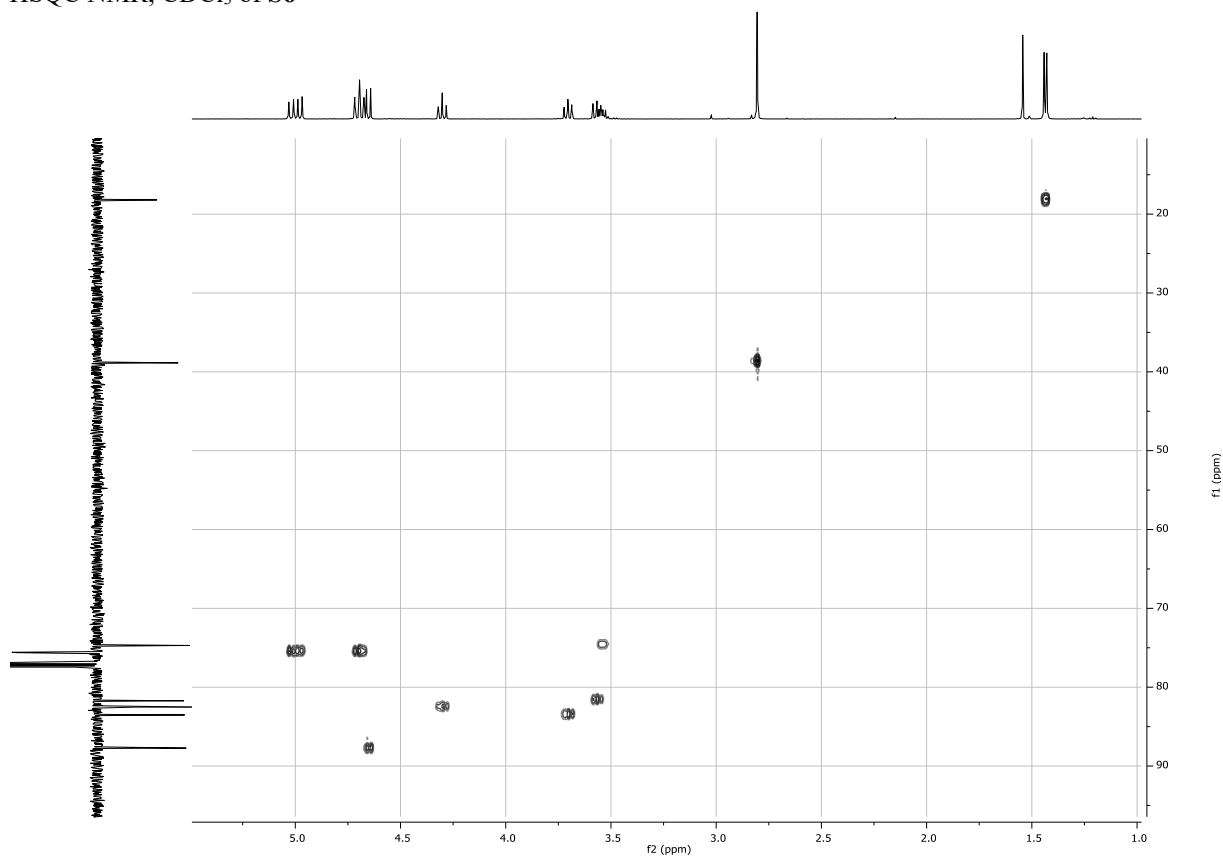

<sup>1</sup>H NMR, 400 MHz, CDCl<sub>3</sub> of **3**

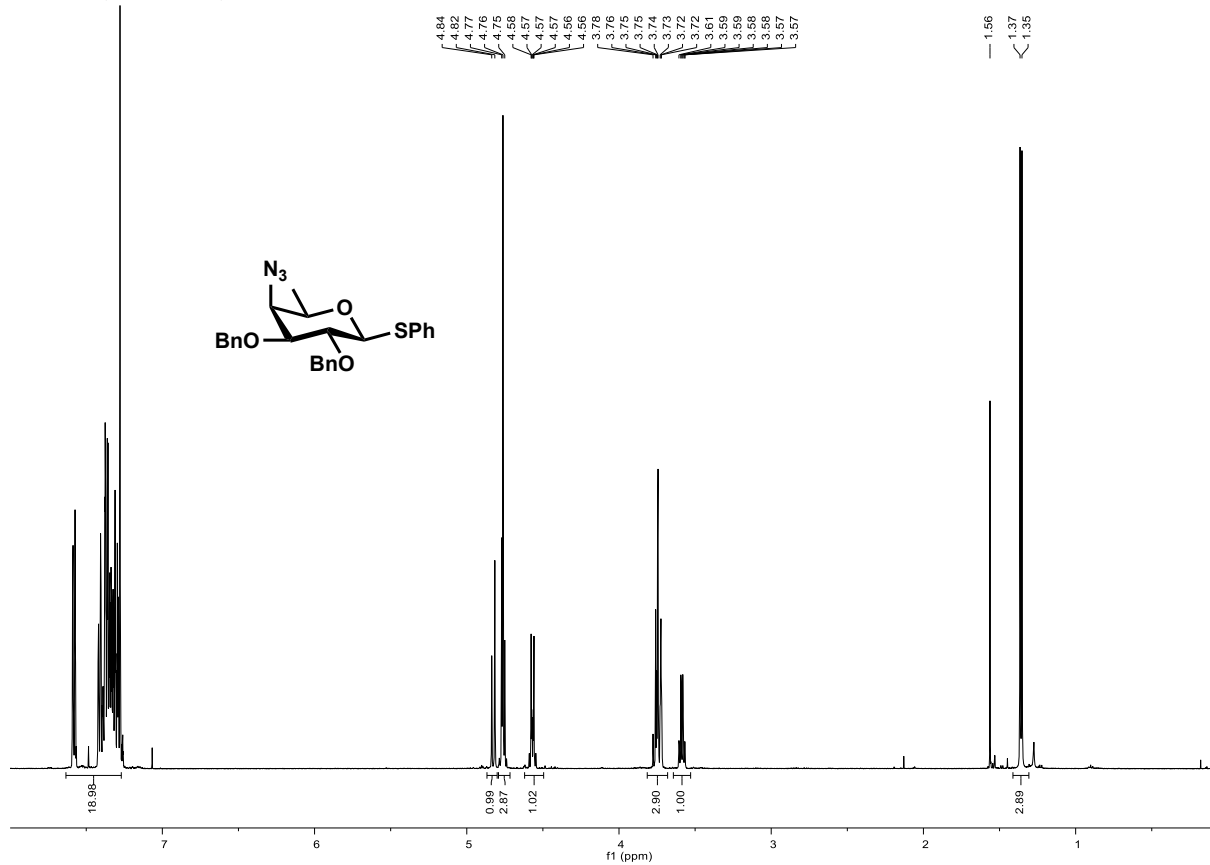

$^{13}\text{C}$  NMR, 101 MHz,  $\text{CDCl}_3$  of **3**

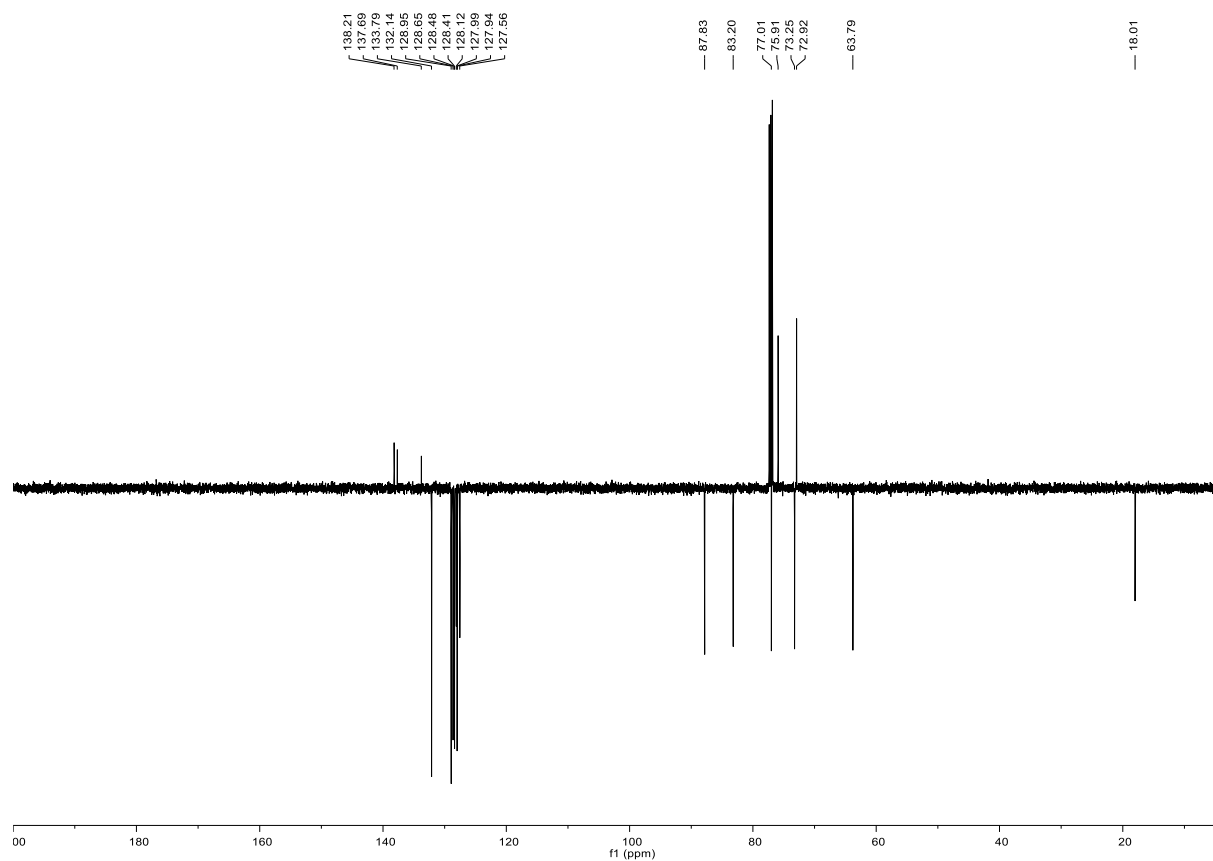

$^1\text{H}$   
H-COSY NMR,  $\text{CDCl}_3$  of **3**

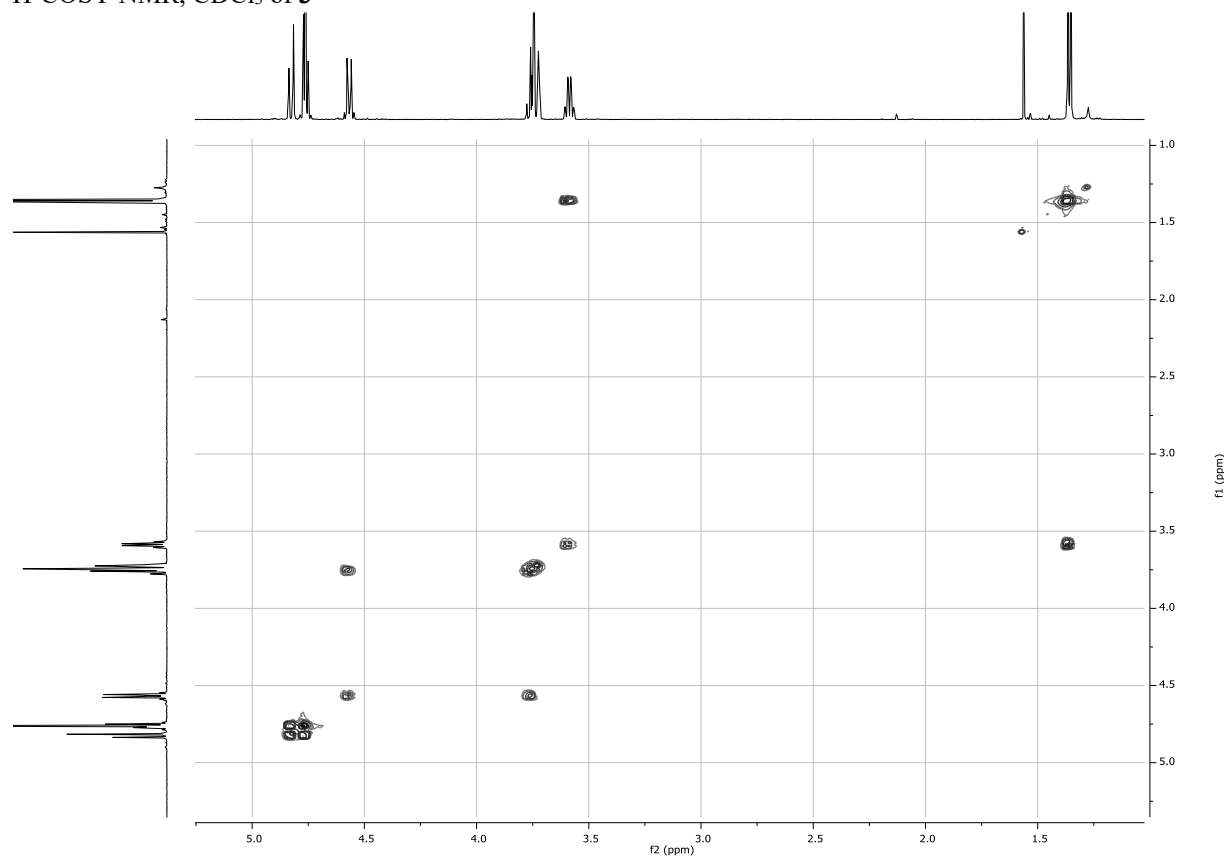

HSQC NMR, CDCl<sub>3</sub> of **3**

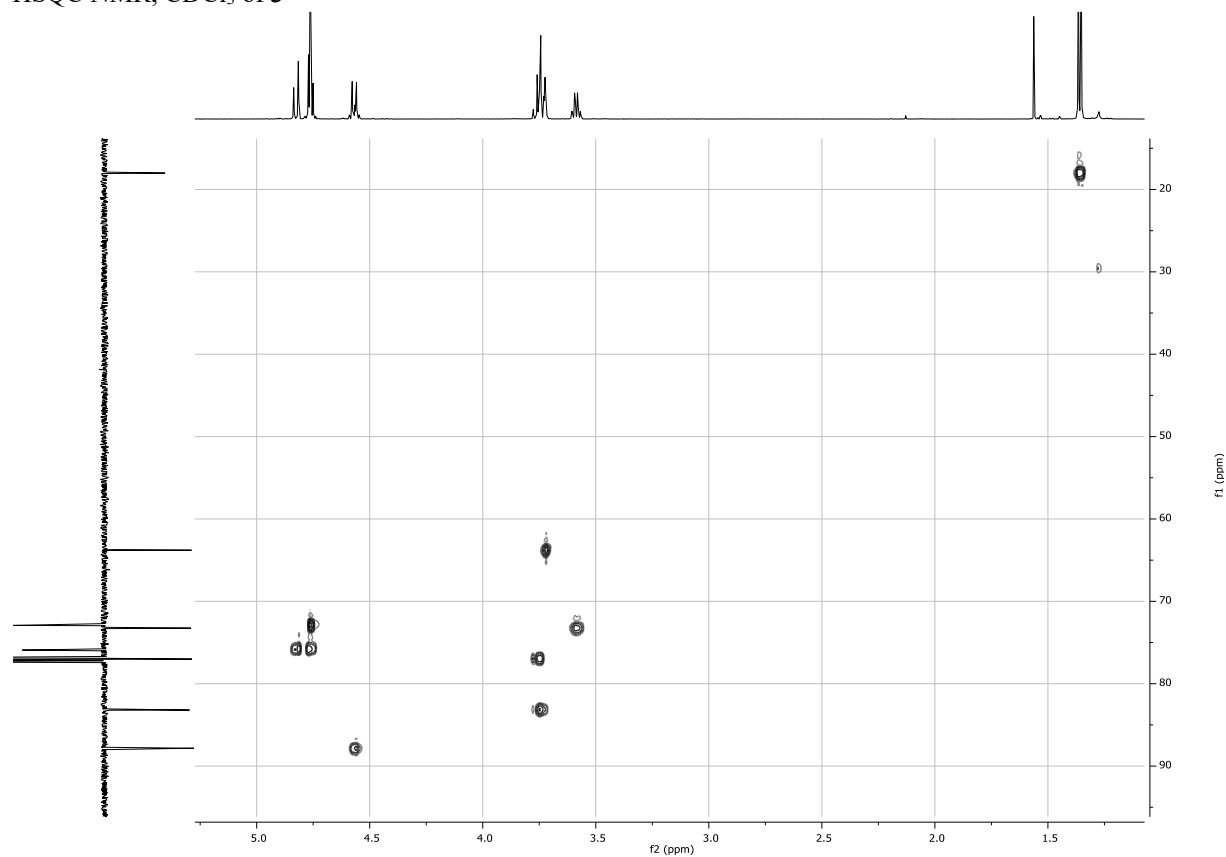

<sup>1</sup>H NMR, 400 MHz, CDCl<sub>3</sub> of **S7**

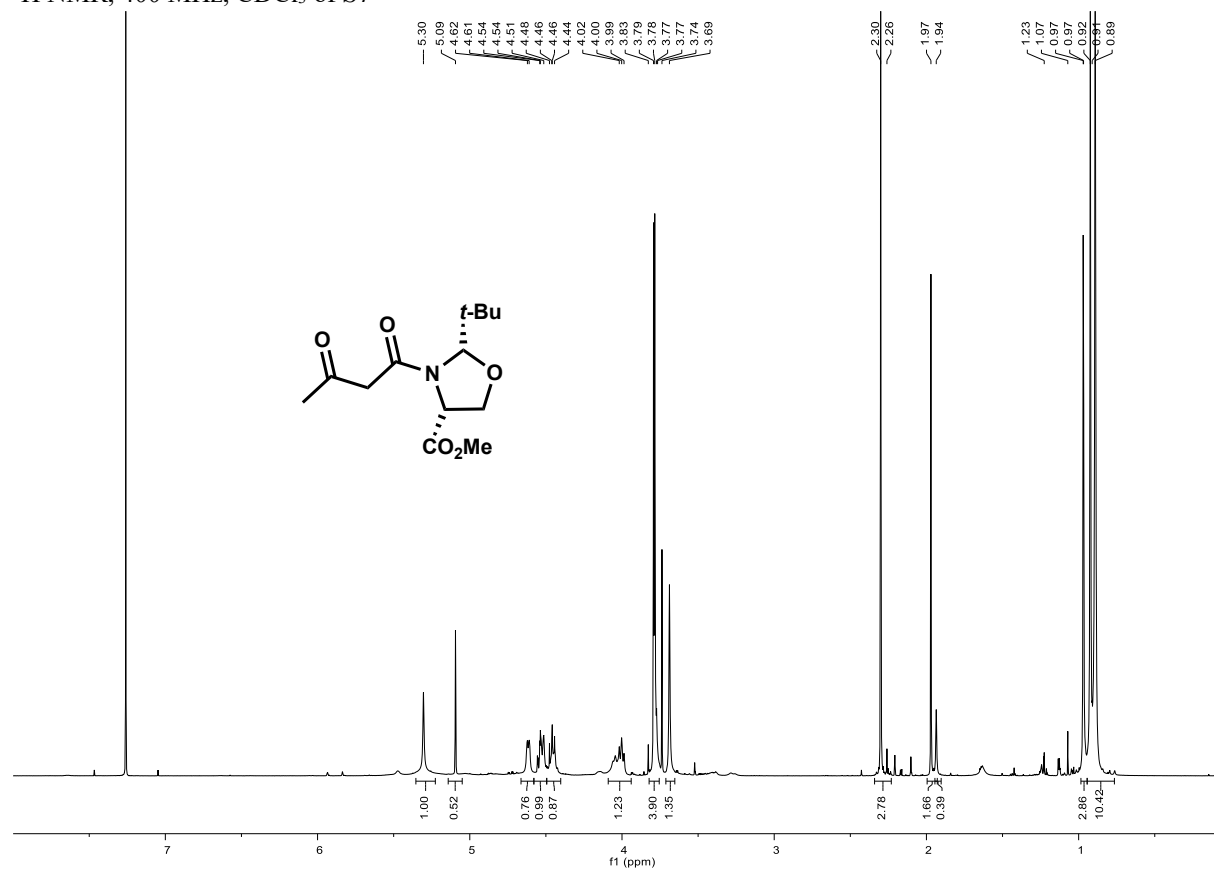

$^{13}\text{C}$  NMR, 101 MHz,  $\text{CDCl}_3$  of S7

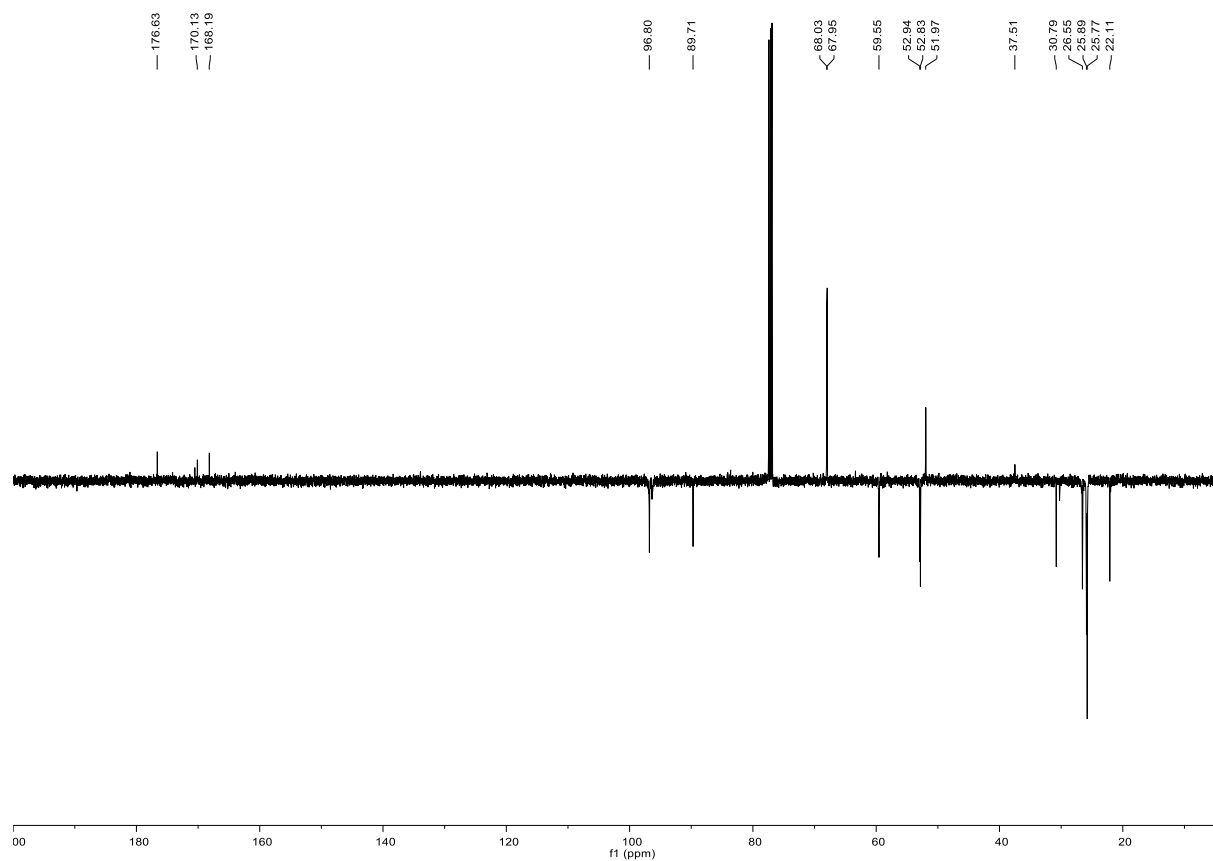

HH-COSY NMR,  $\text{CDCl}_3$  of S7

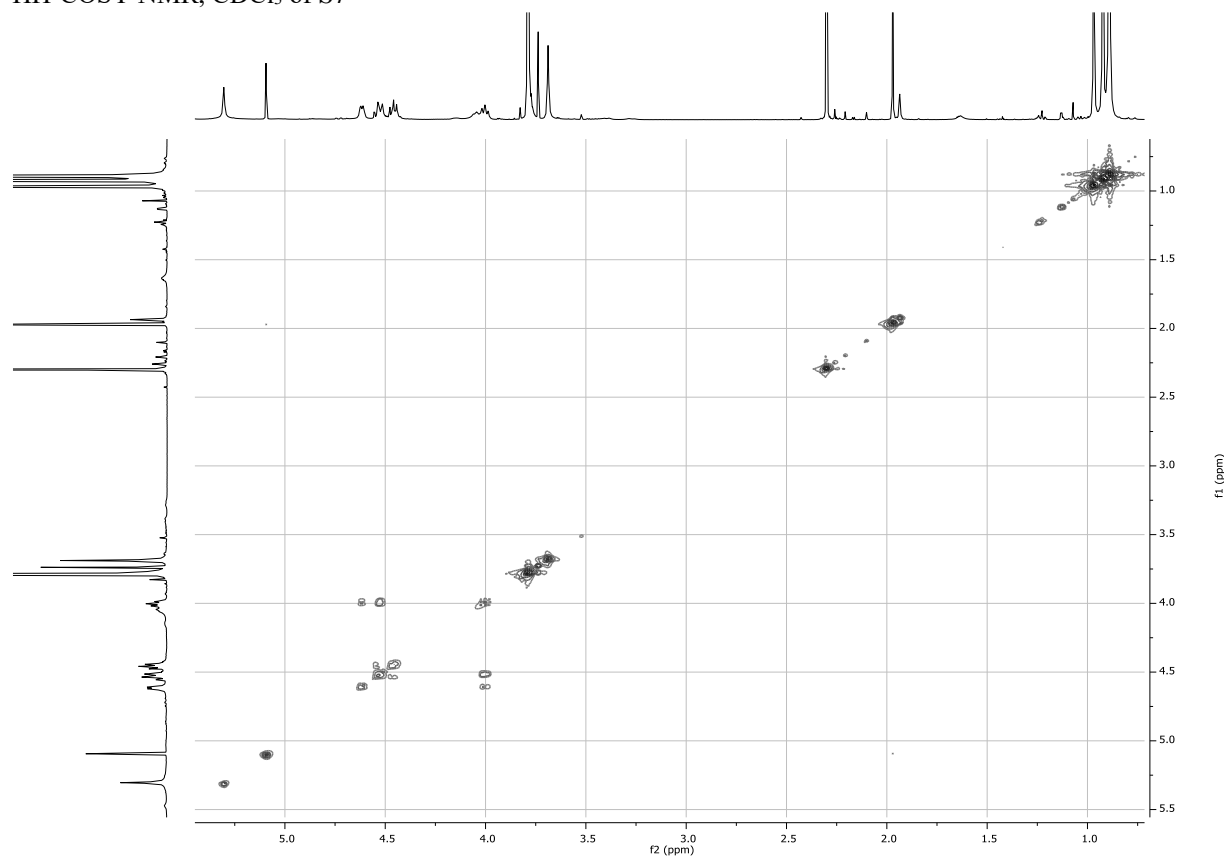

HSQC NMR, CDCl<sub>3</sub> of S7

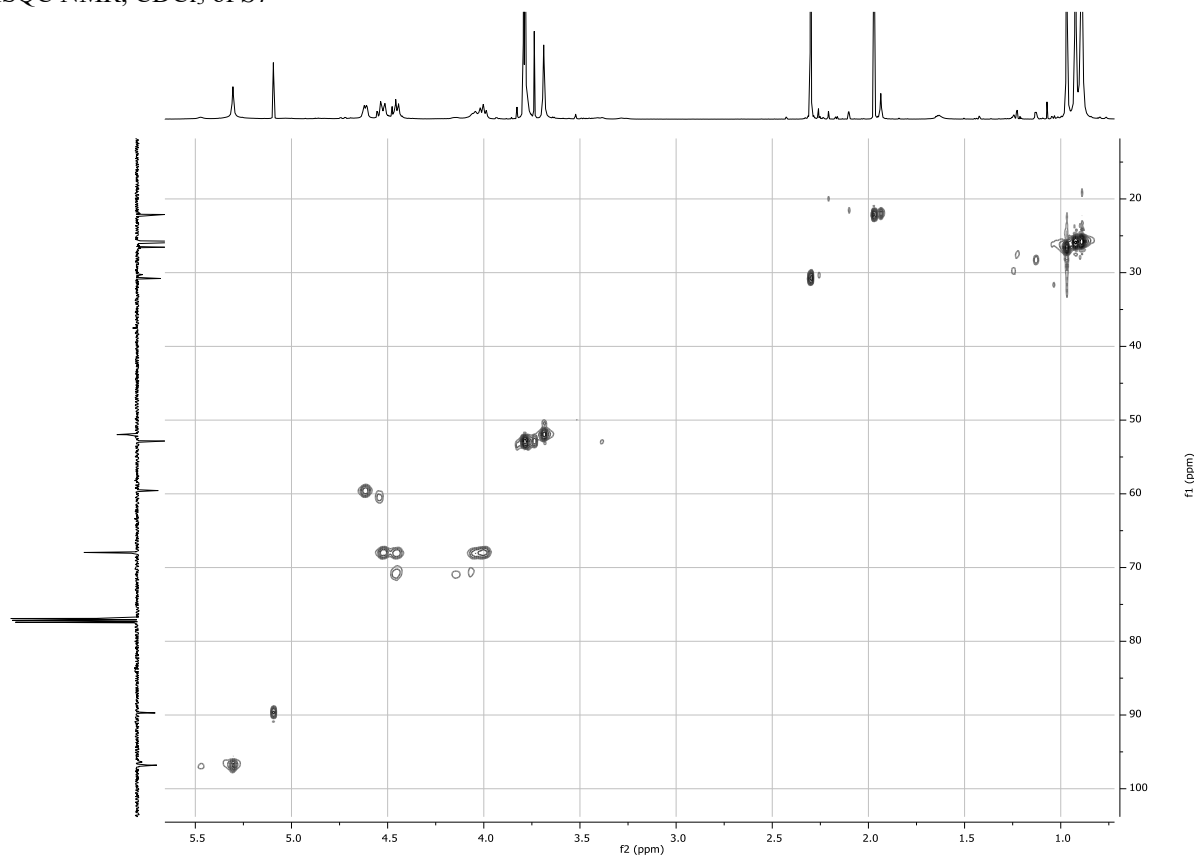

<sup>1</sup>H NMR, 400 MHz, CDCl<sub>3</sub> of S8

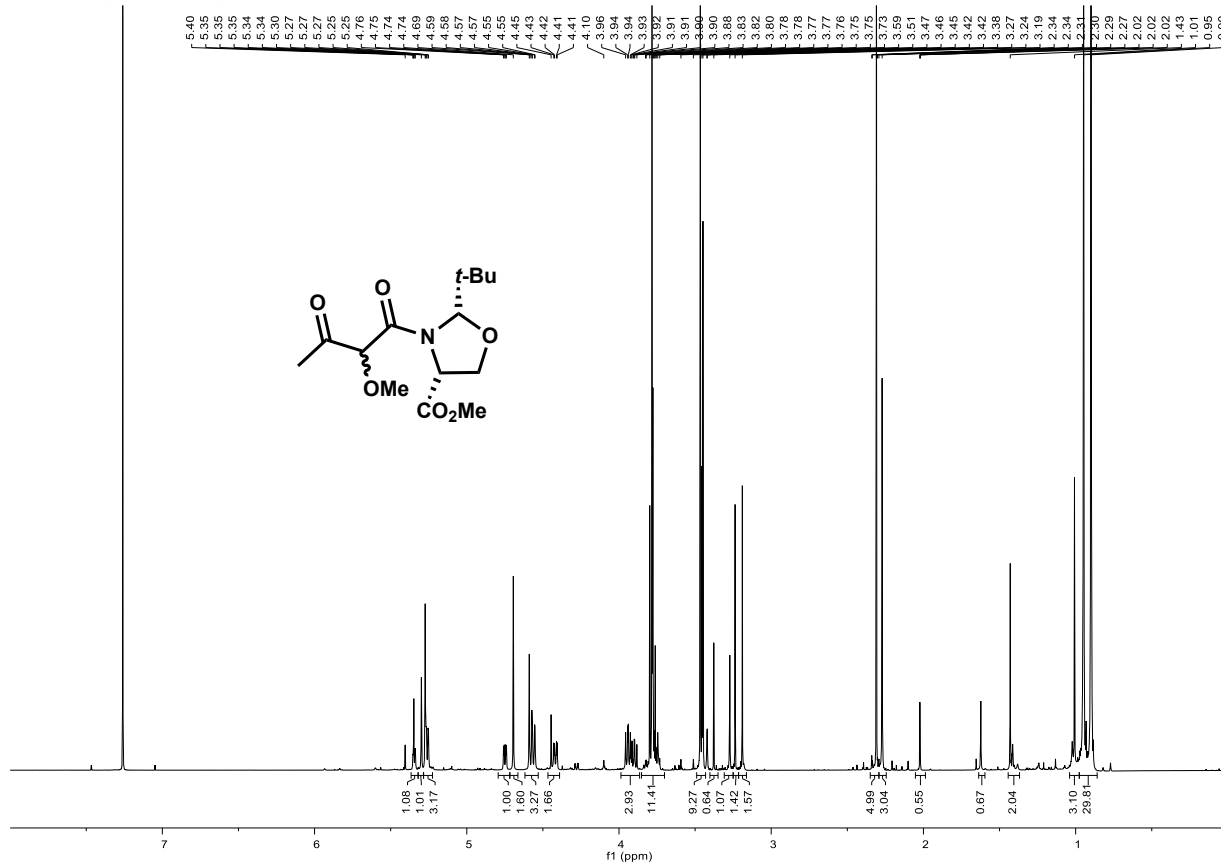

$^{13}\text{C}$  NMR, 101 MHz,  $\text{CDCl}_3$  of **S8**

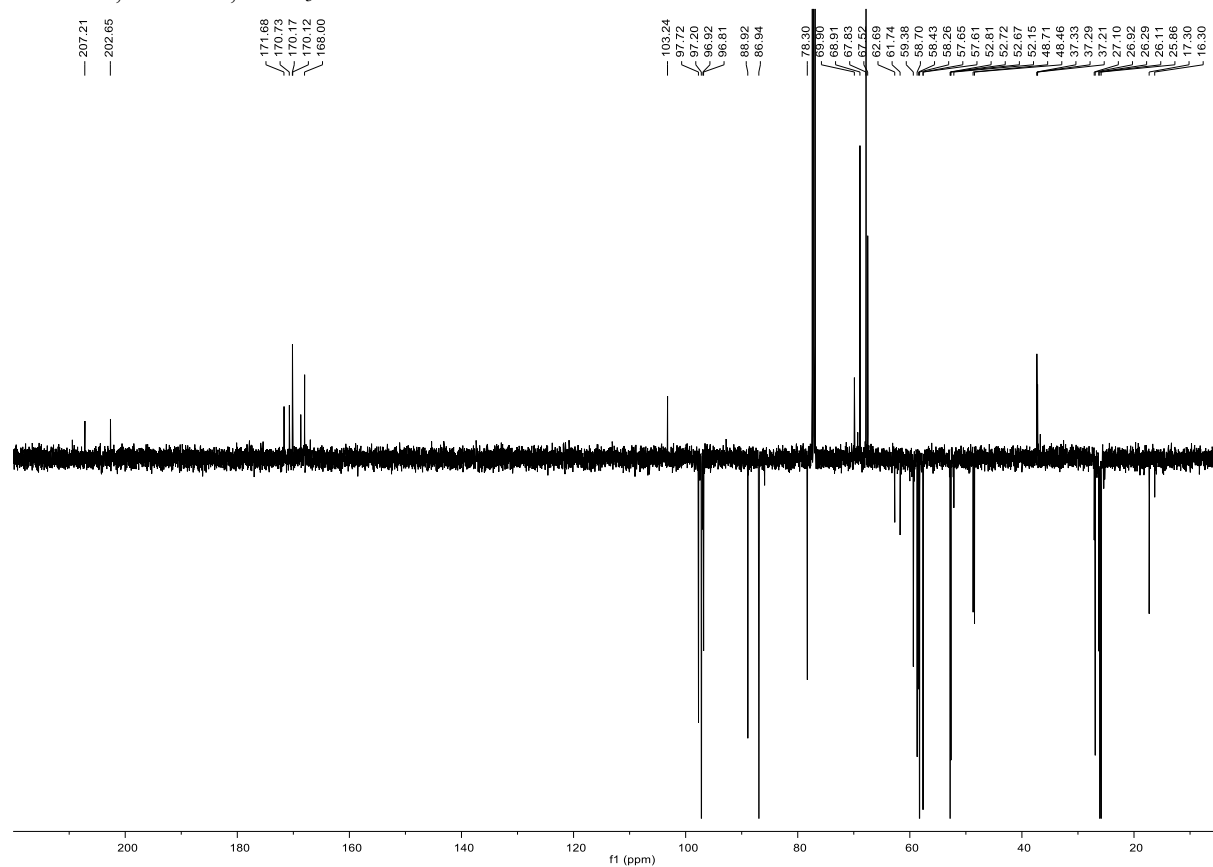

HH-COSY NMR,  $\text{CDCl}_3$  of **S8**

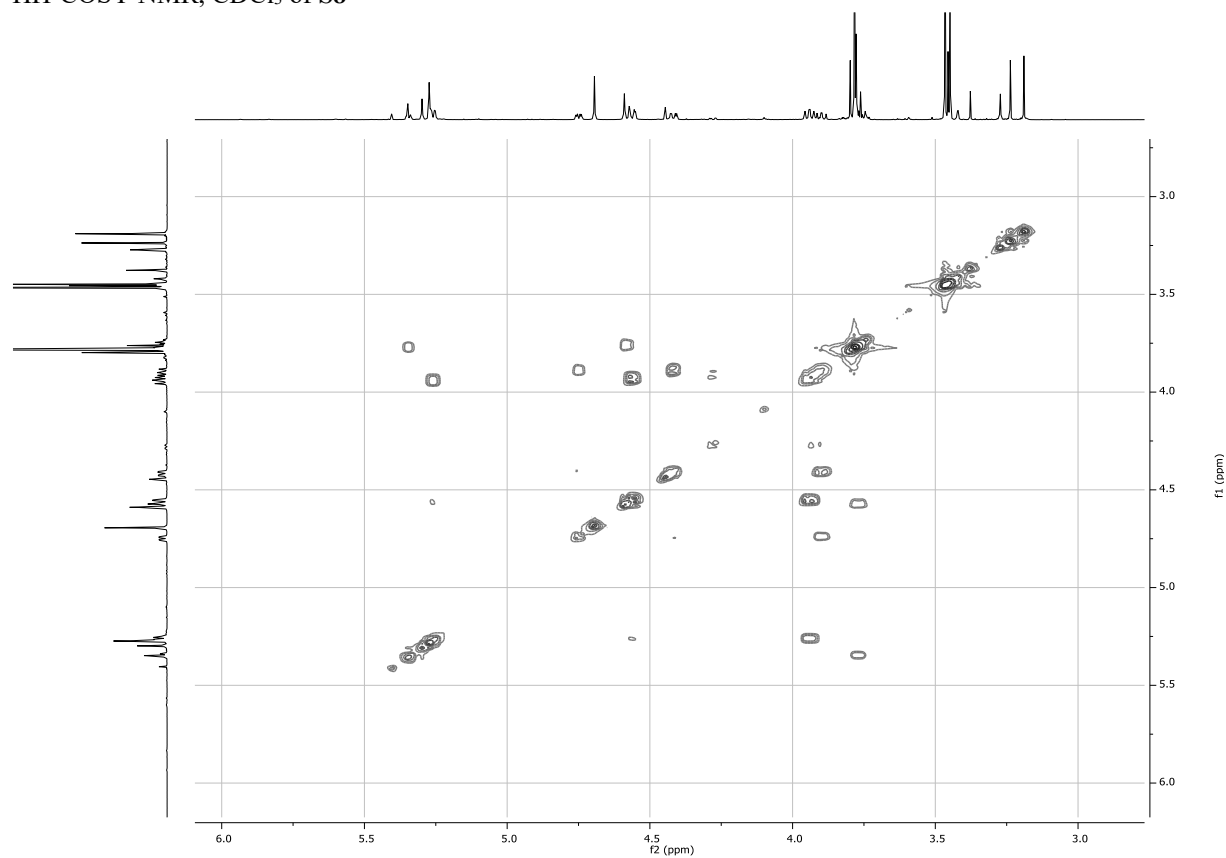

HSQC NMR, CDCl<sub>3</sub> of **S8**

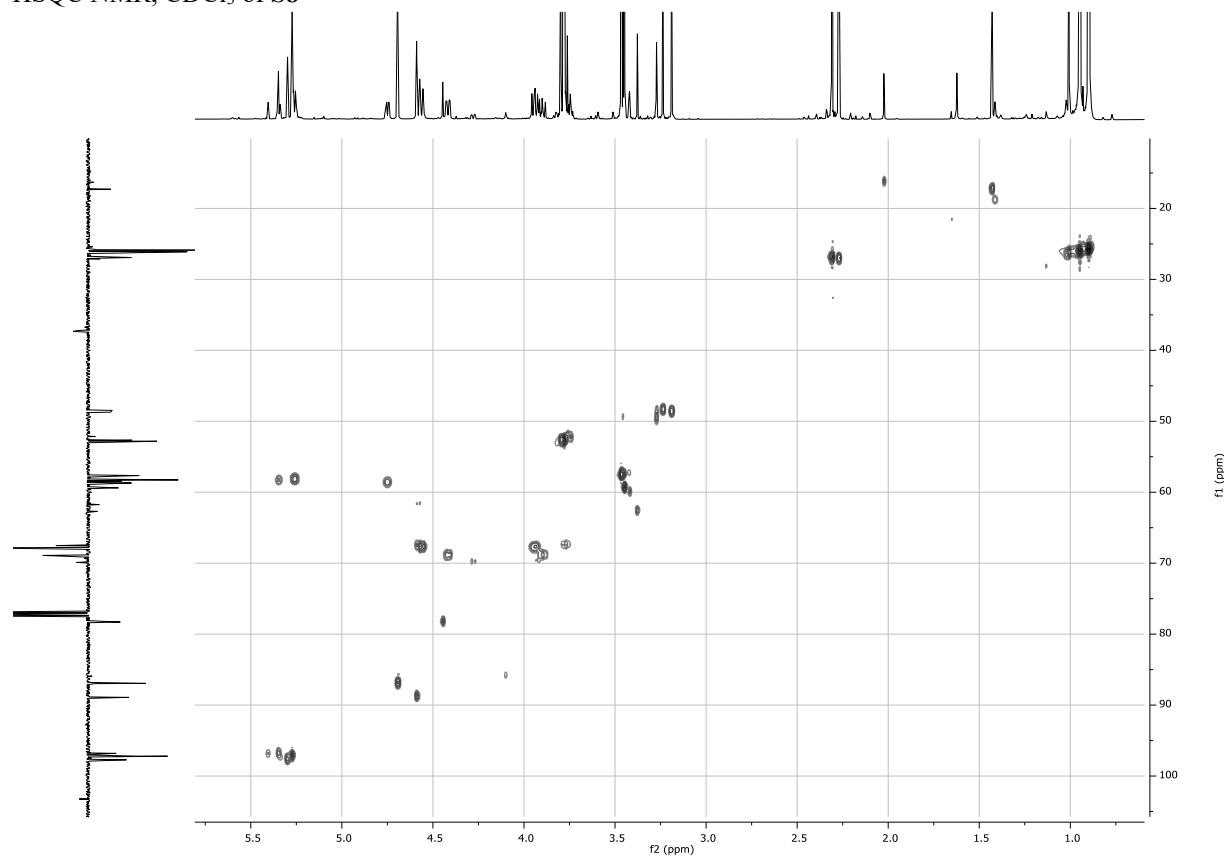

<sup>1</sup>H NMR, 400 MHz, CDCl<sub>3</sub> of **S9**

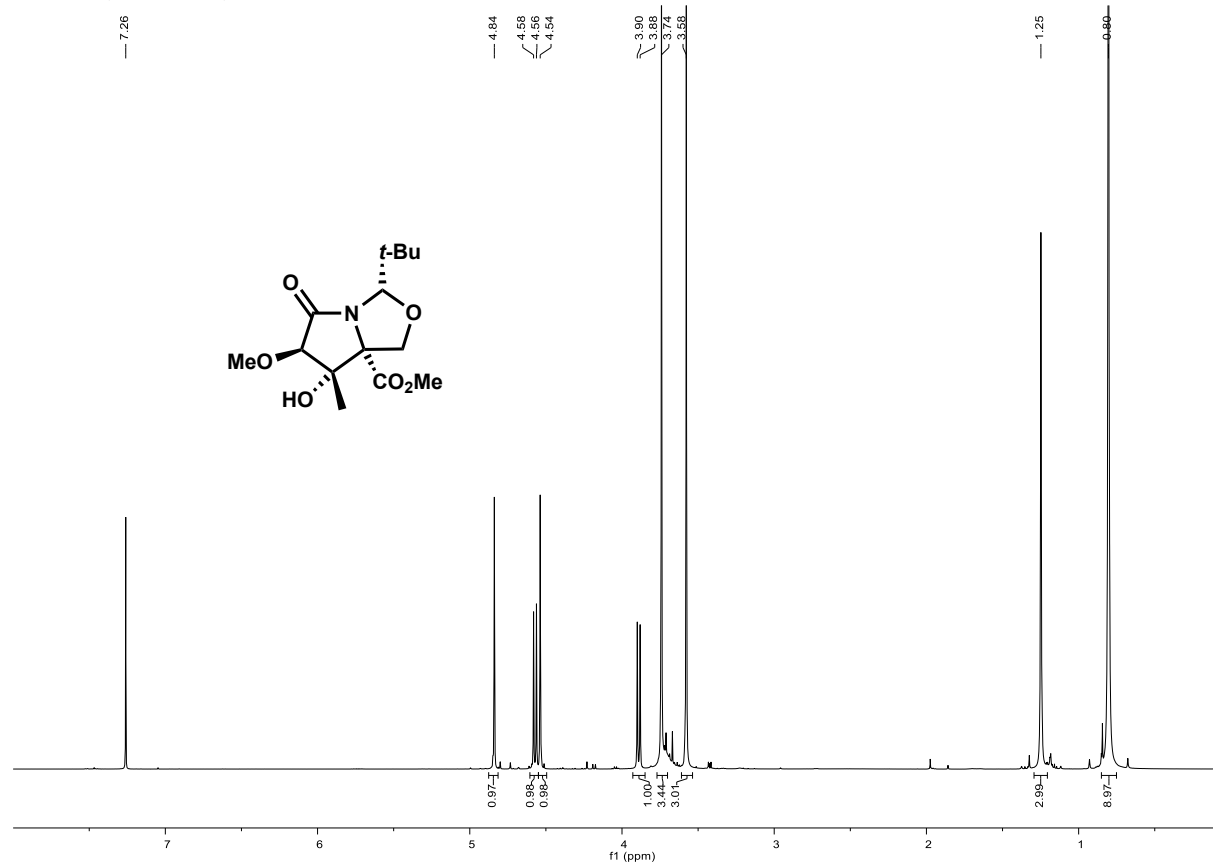

$^{13}\text{C}$  NMR, 101 MHz,  $\text{CDCl}_3$  of **S9**

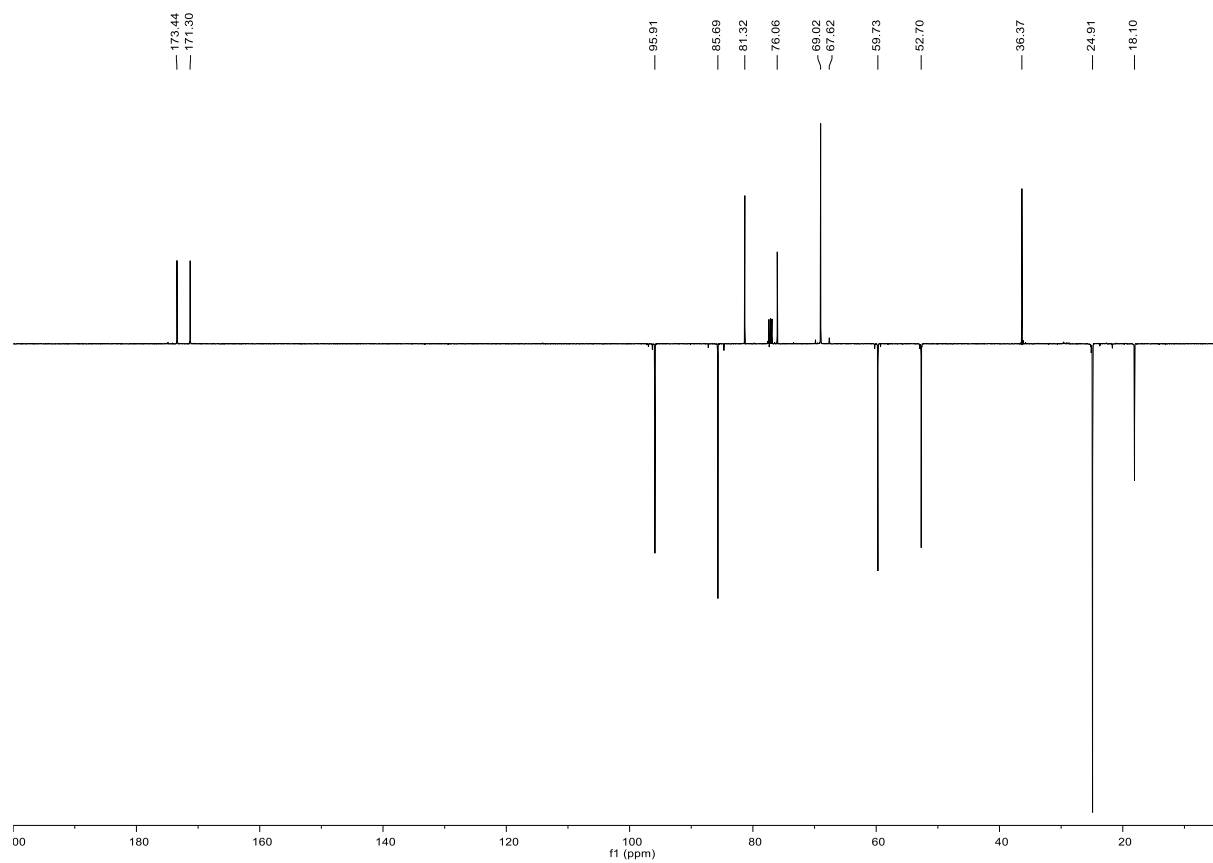

HH-COSY NMR,  $\text{CDCl}_3$  of **S9**

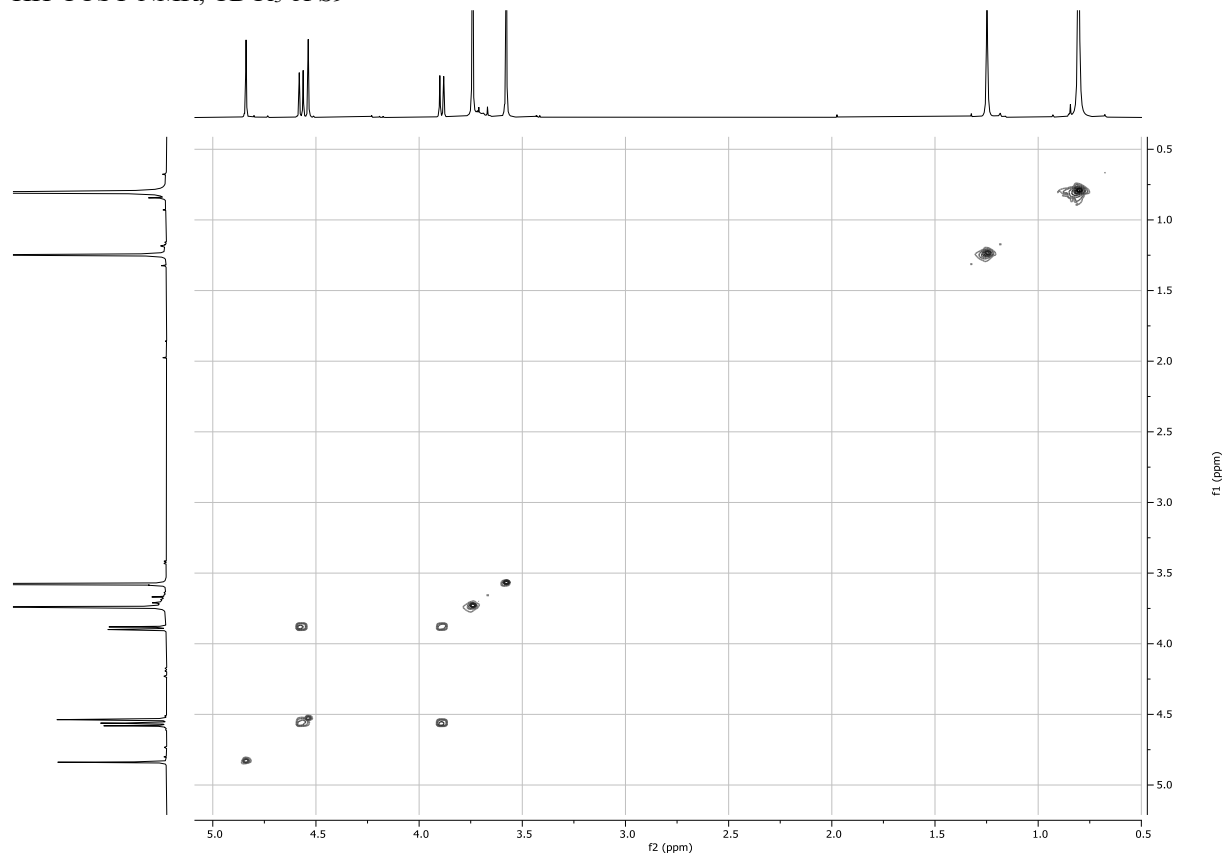



HSQC NMR, CDCl<sub>3</sub> of **S9**

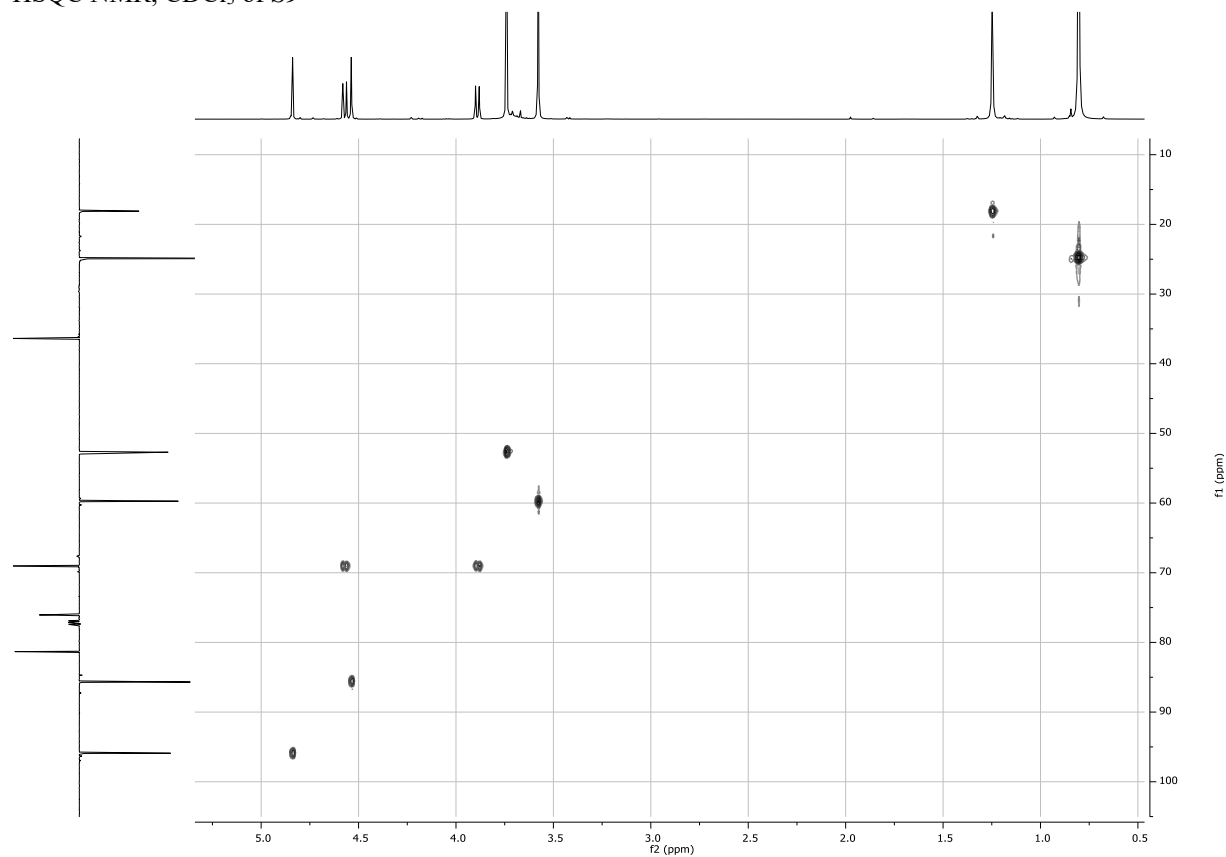

<sup>1</sup>H NMR, 500 MHz, CDCl<sub>3</sub> of **S10**

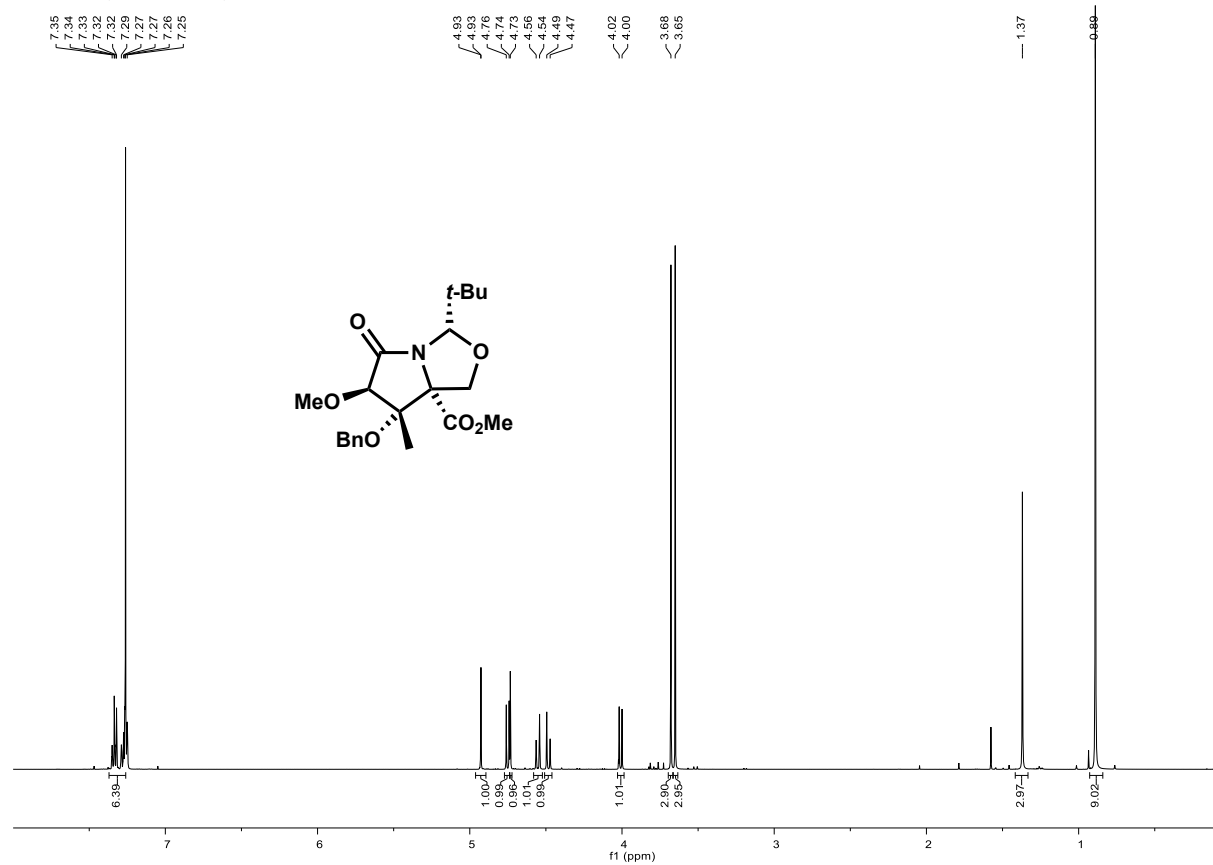

<sup>13</sup>C NMR, 126 MHz, CDCl<sub>3</sub> of S10

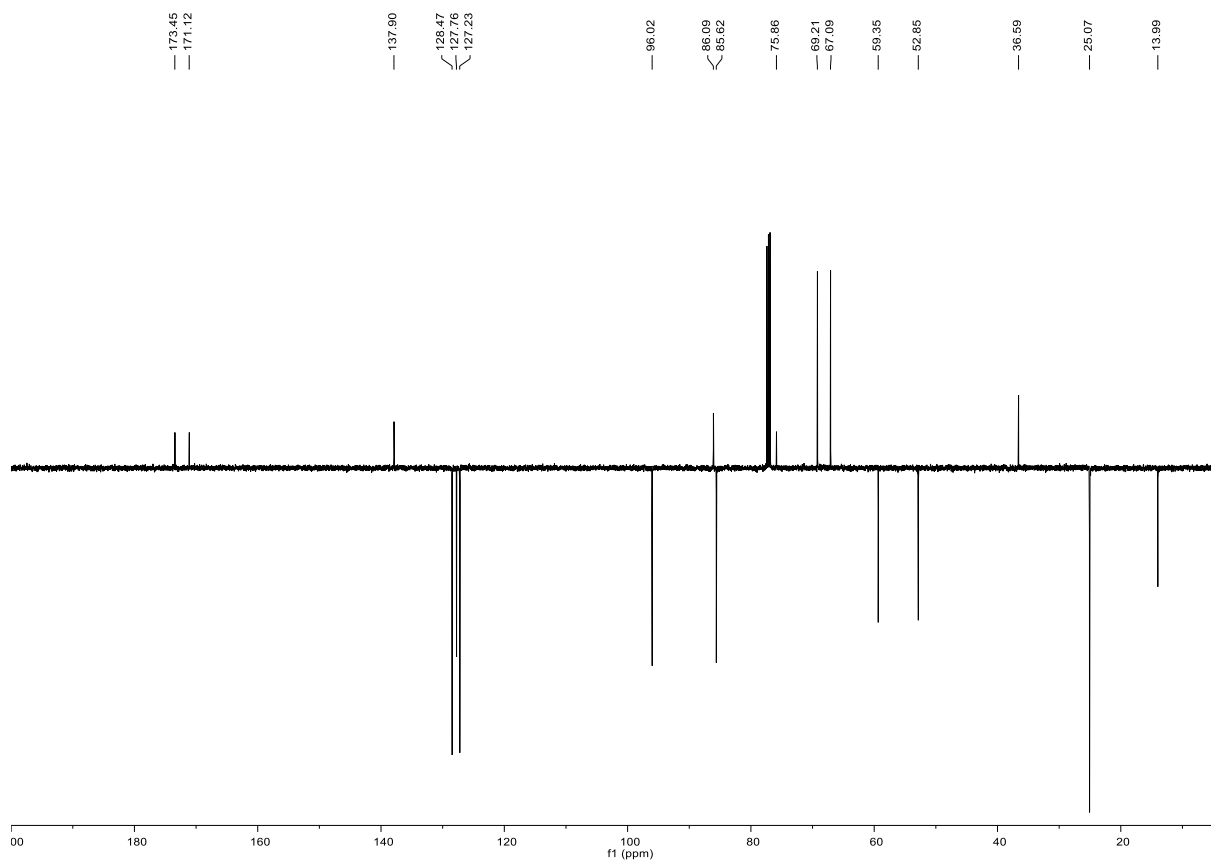

HH-COSY NMR, CDCl<sub>3</sub> of S10

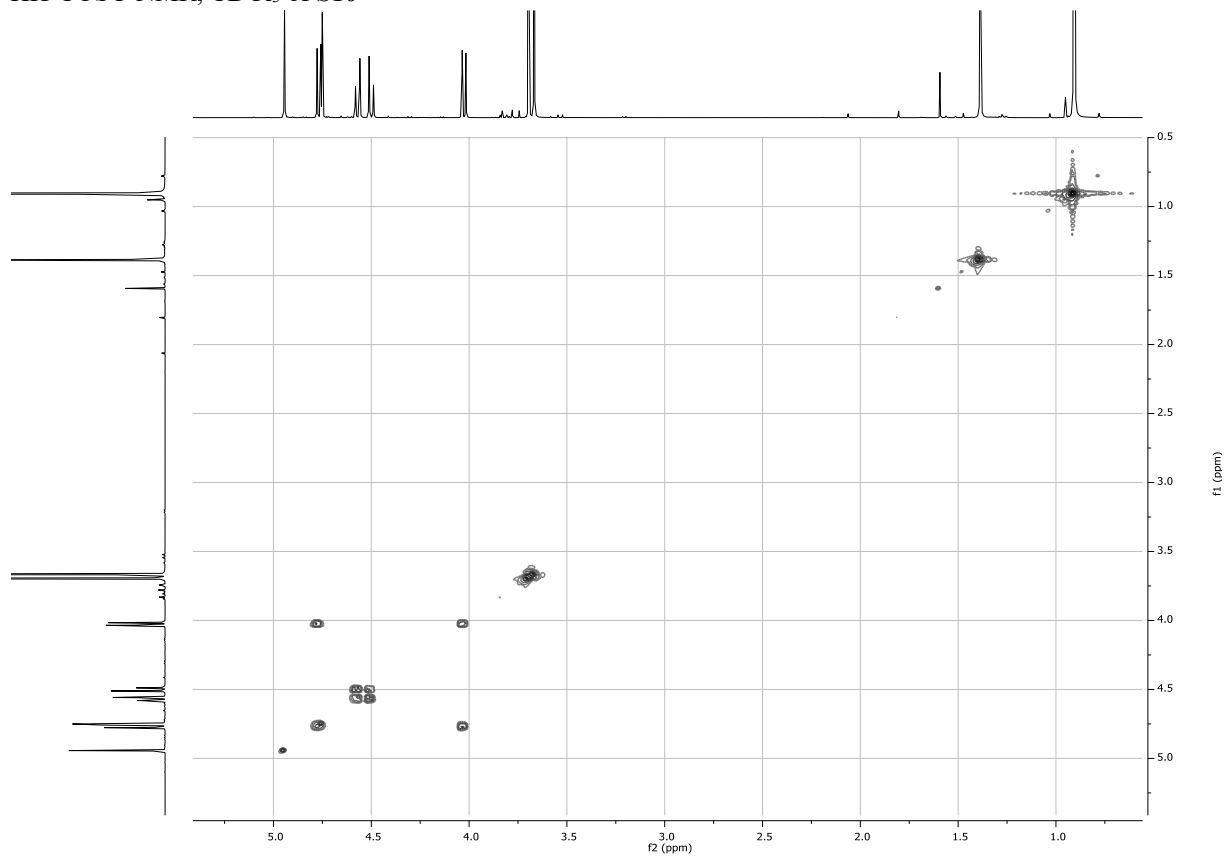

HSQC NMR, CDCl<sub>3</sub> of **S10**

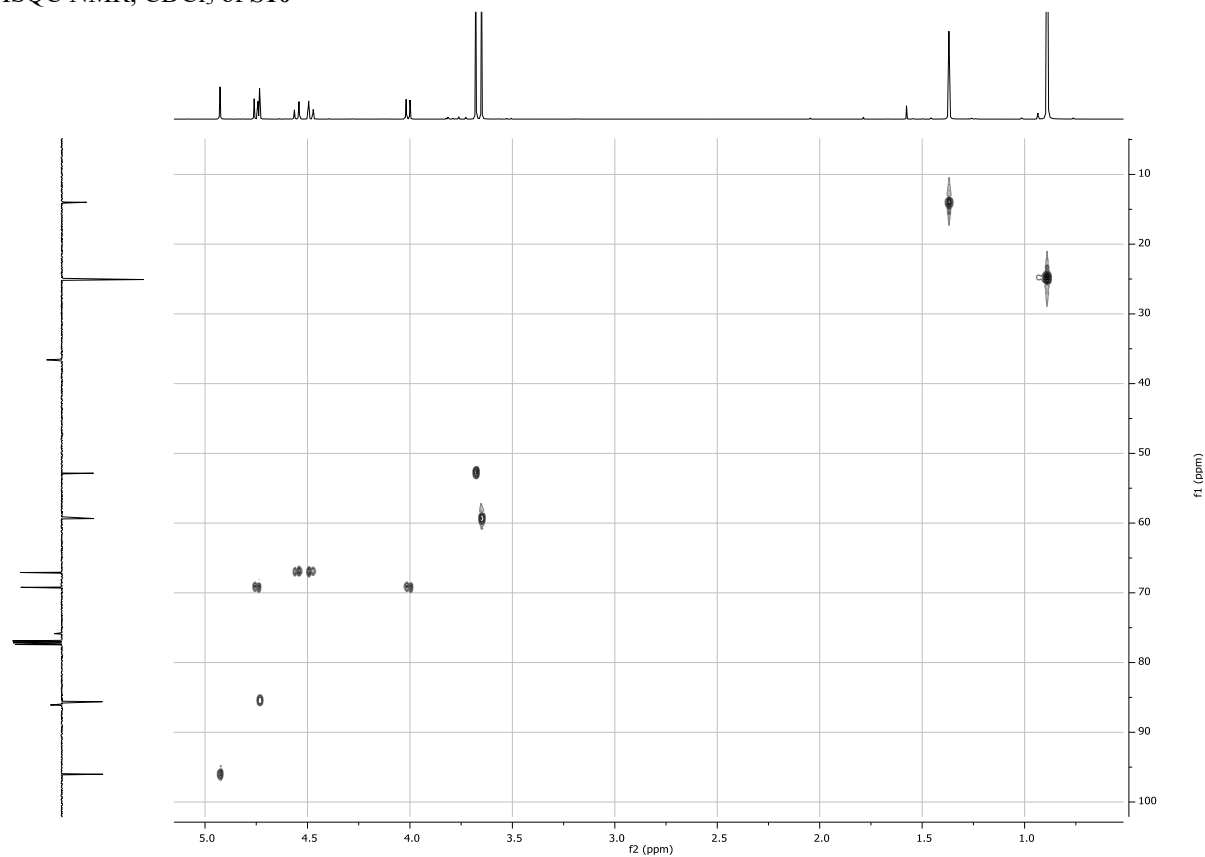

<sup>1</sup>H NMR, 400 MHz, CDCl<sub>3</sub> of **S11**

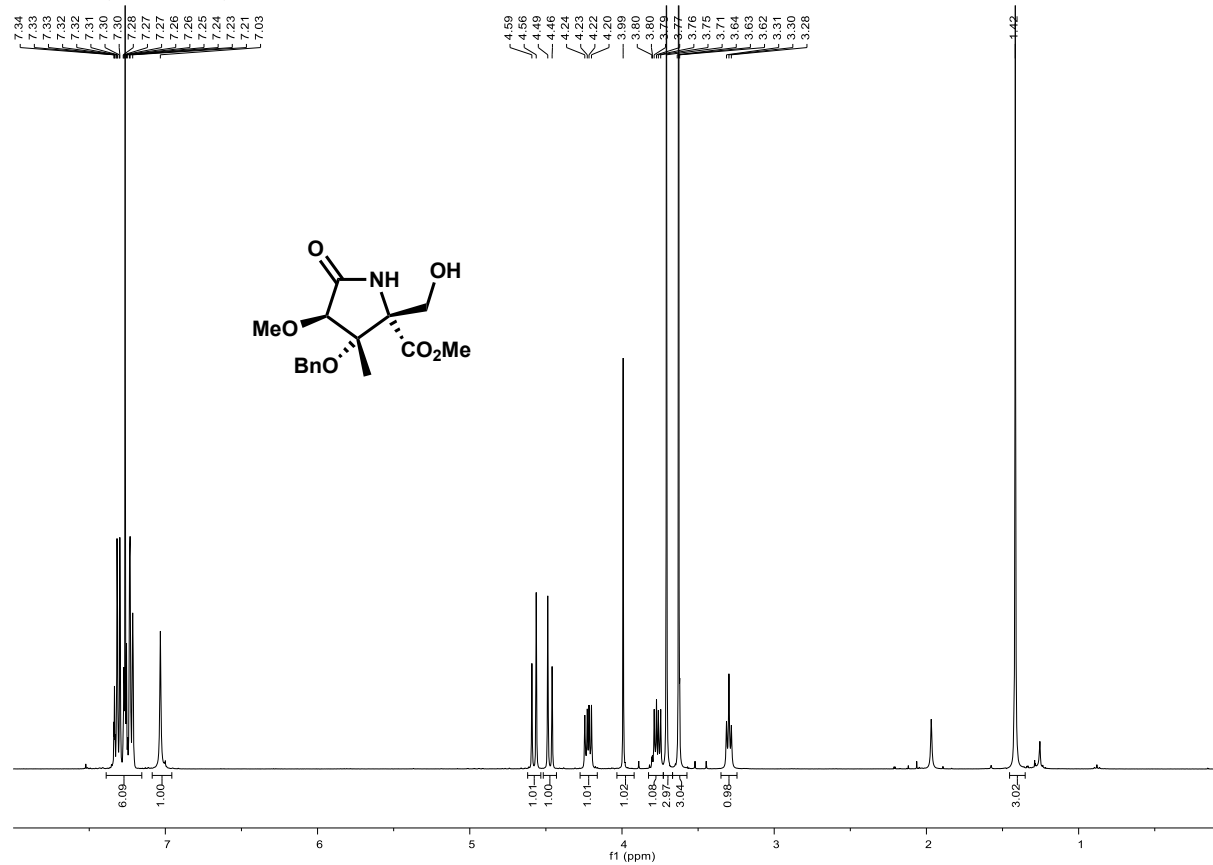

<sup>13</sup>C NMR, 101 MHz, CDCl<sub>3</sub> of S11

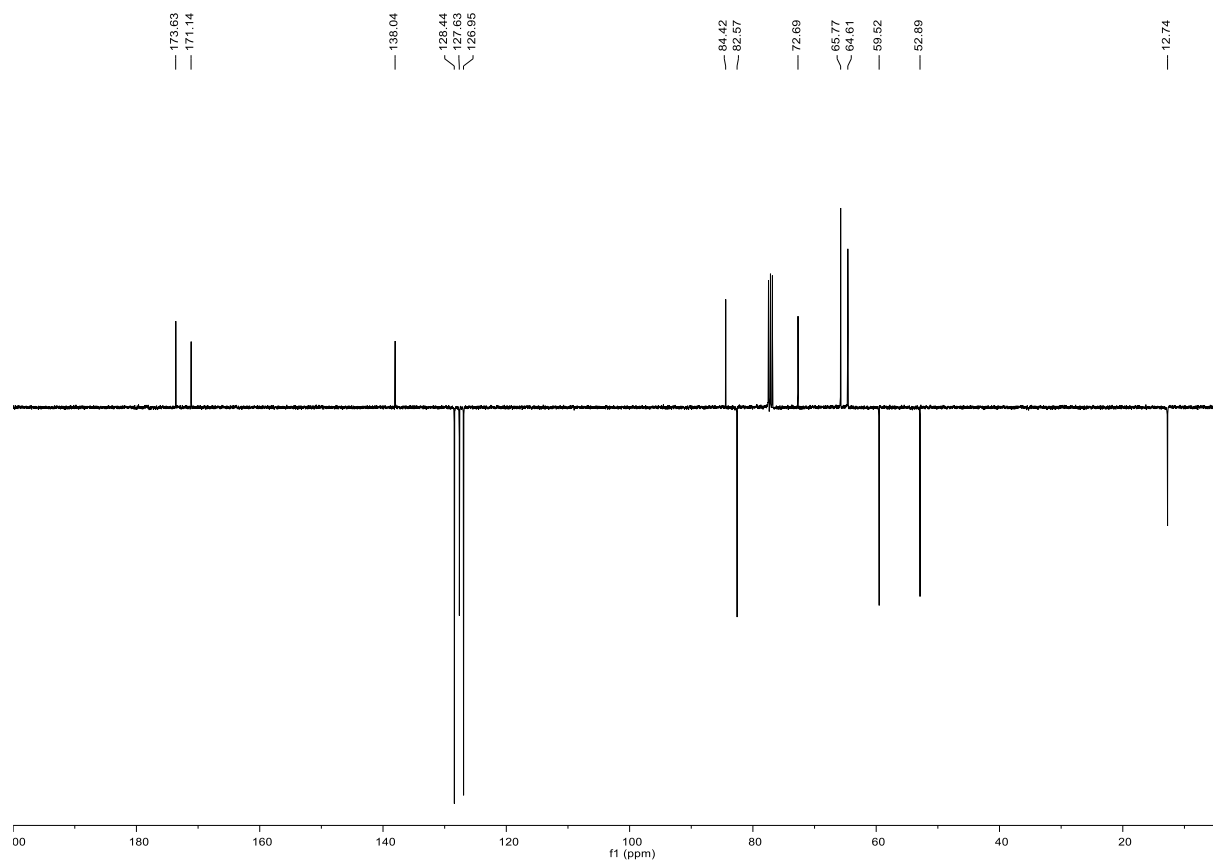

HH-COSY NMR, CDCl<sub>3</sub> of S11

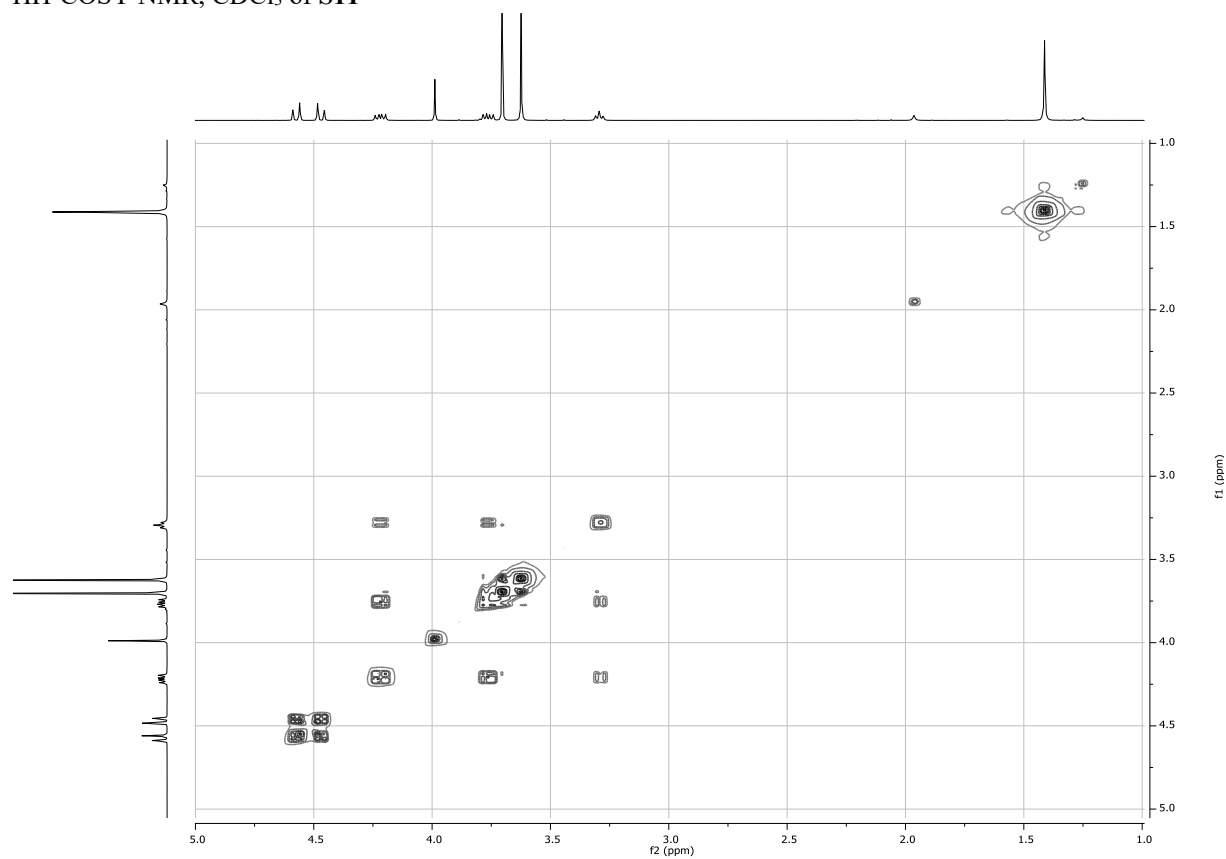



<sup>13</sup>C NMR, 101 MHz, CDCl<sub>3</sub> of S12

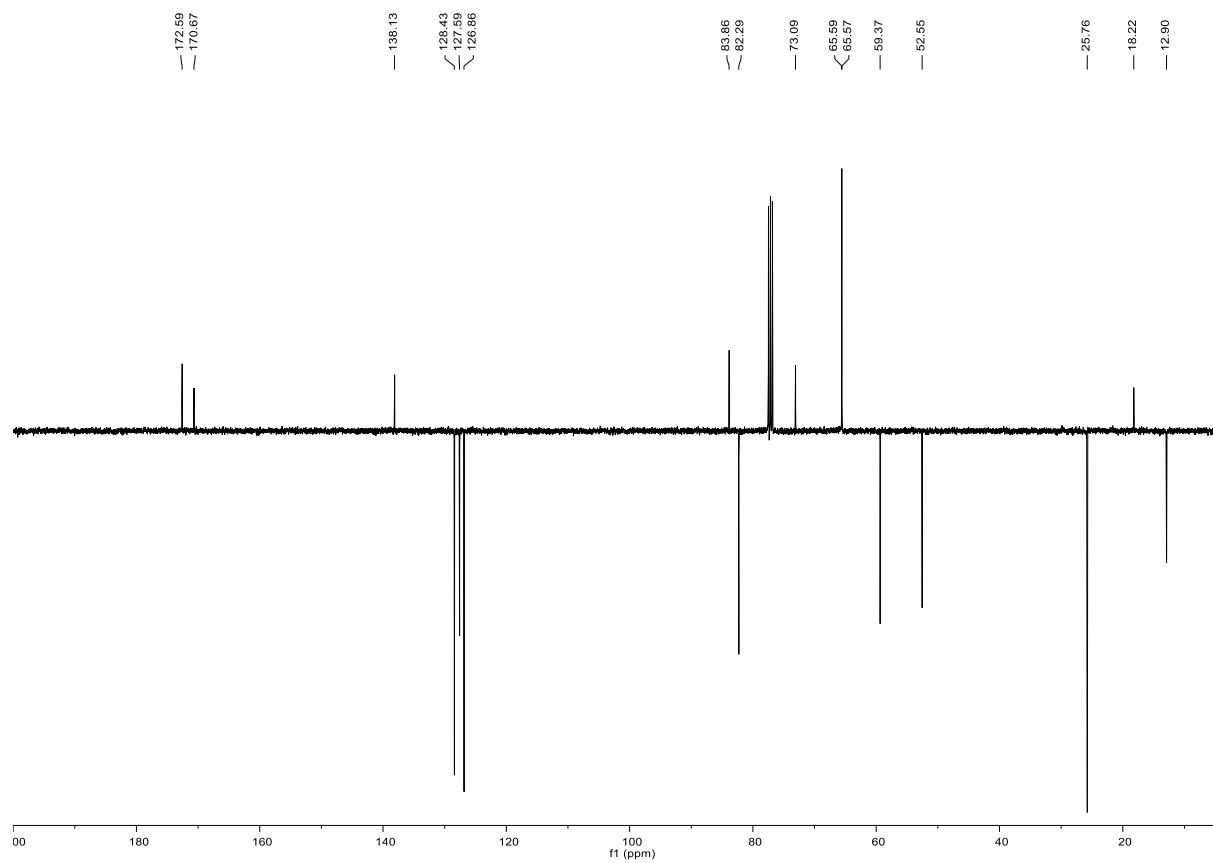

HH-COSY NMR, CDCl<sub>3</sub> of S12

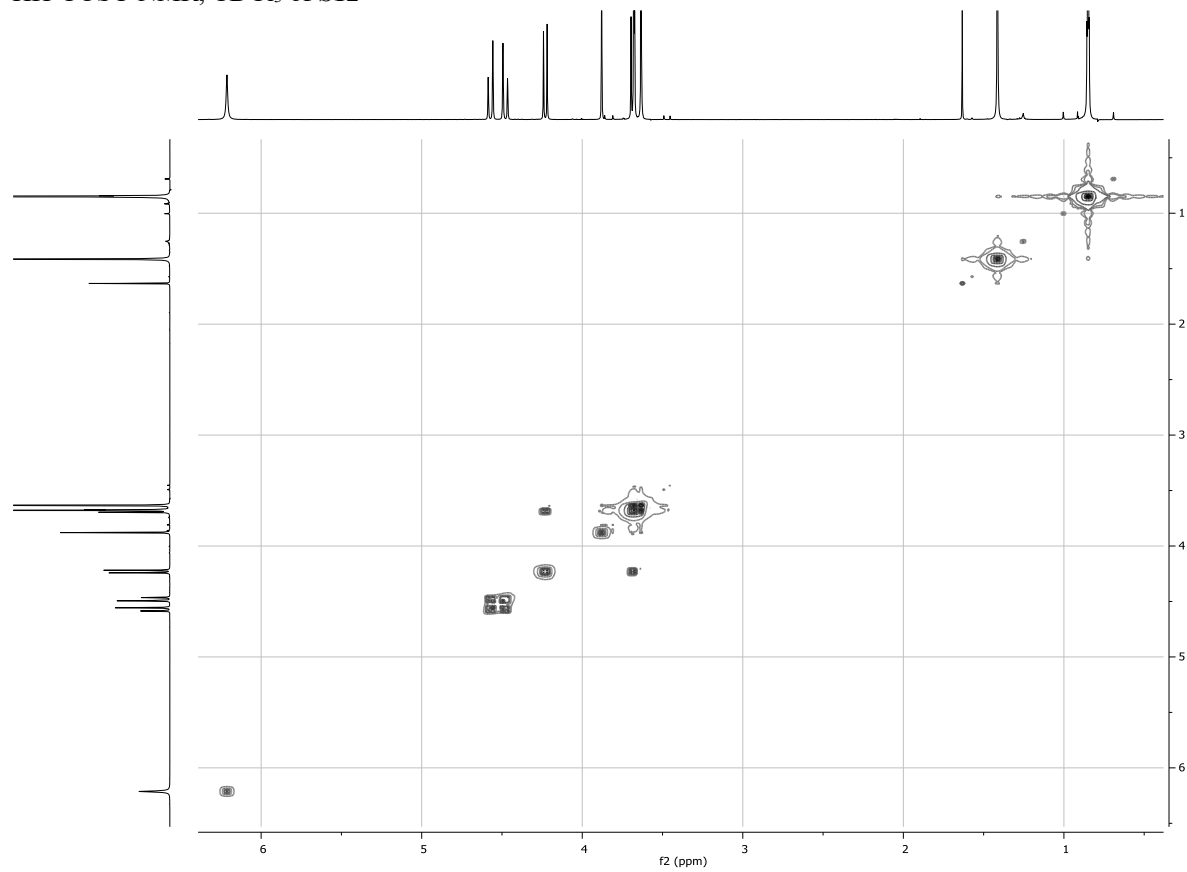



<sup>13</sup>C NMR, 101 MHz, CDCl<sub>3</sub> of **S13**

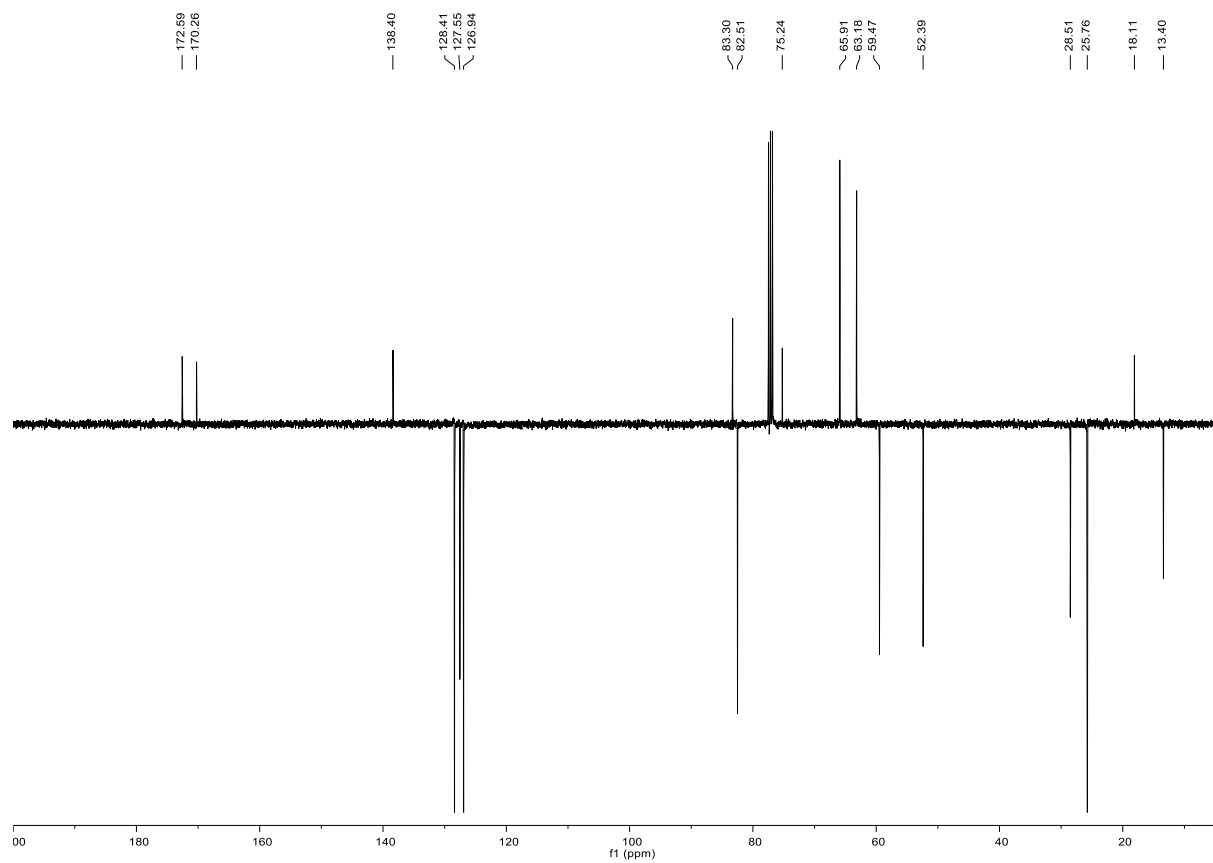

HH-COSY NMR, CDCl<sub>3</sub> of **S13**

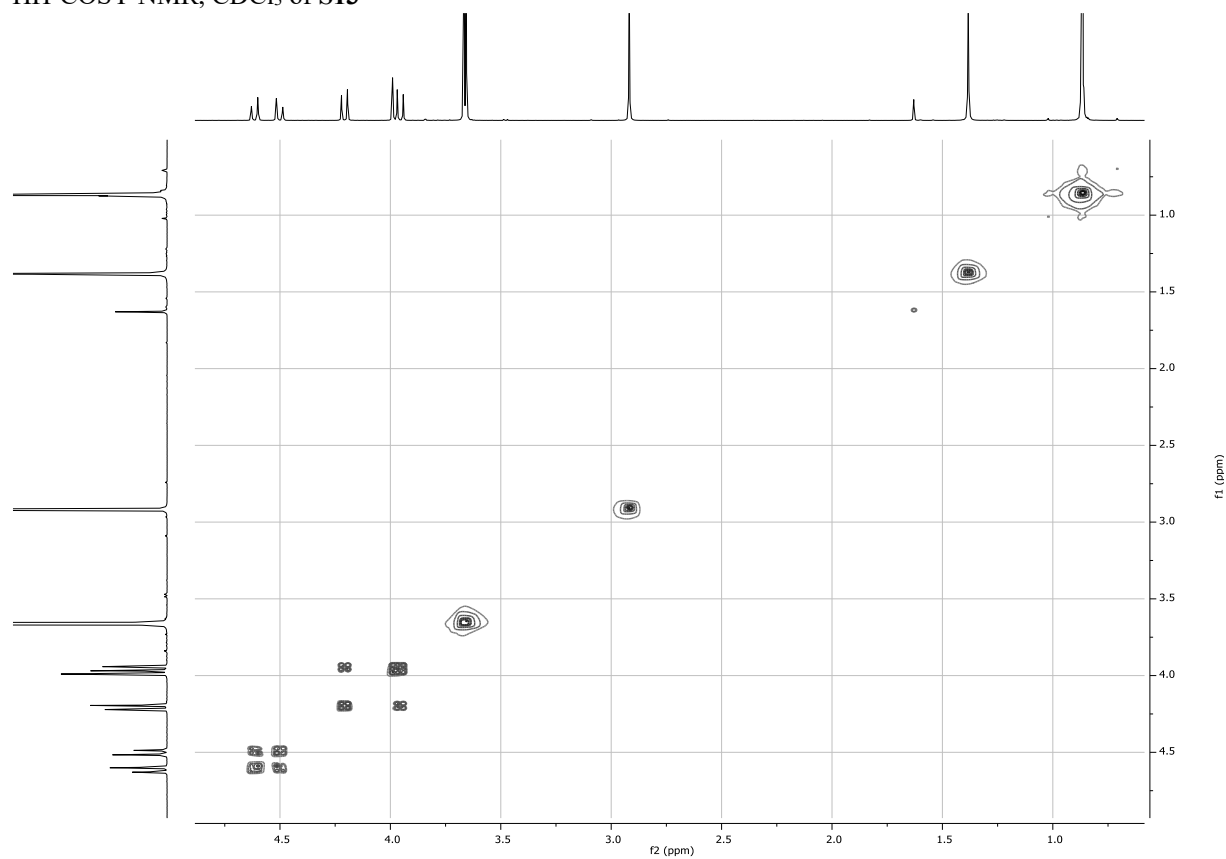



HSQC NMR, CDCl<sub>3</sub> of **S13**

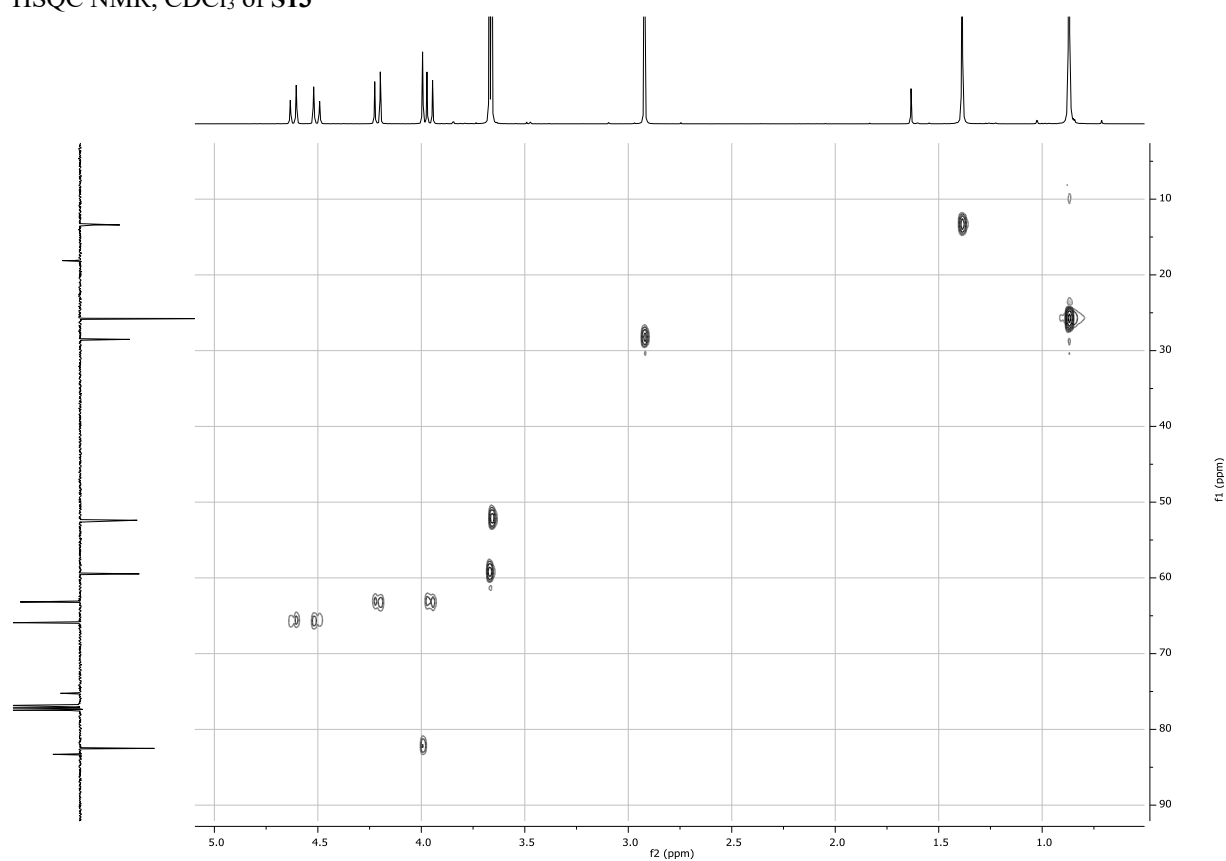

<sup>1</sup>H NMR, 400 MHz, CDCl<sub>3</sub> of **S14**

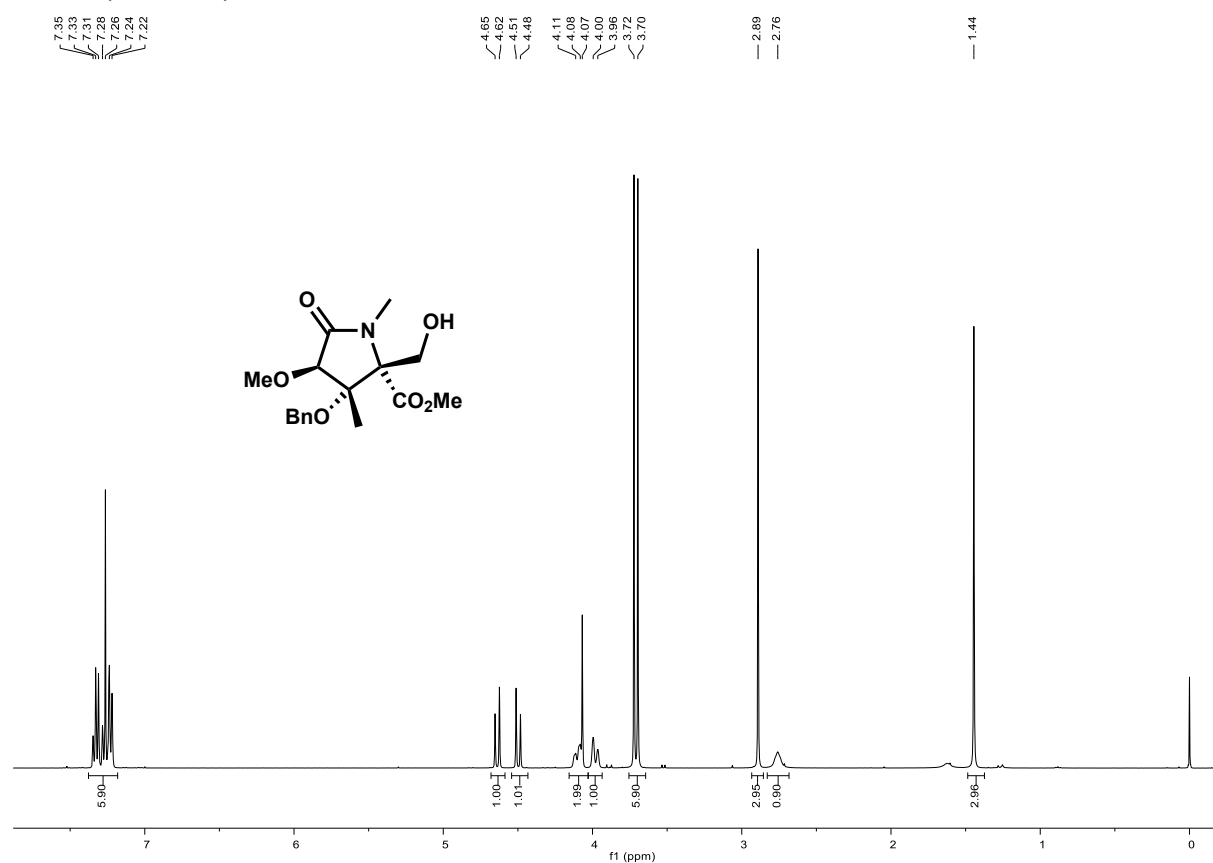

<sup>13</sup>C NMR, 101 MHz, CDCl<sub>3</sub> of S14

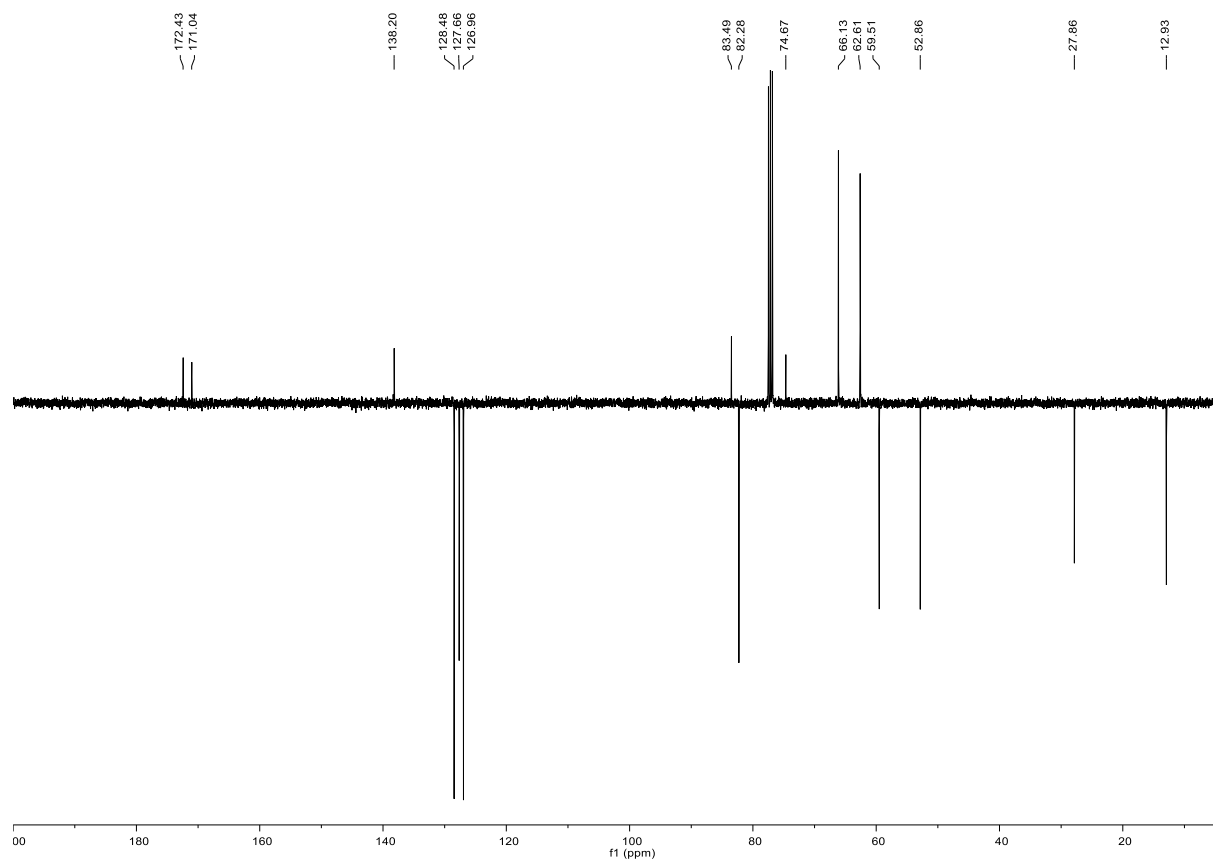

HH-COSY NMR, CDCl<sub>3</sub> of S14

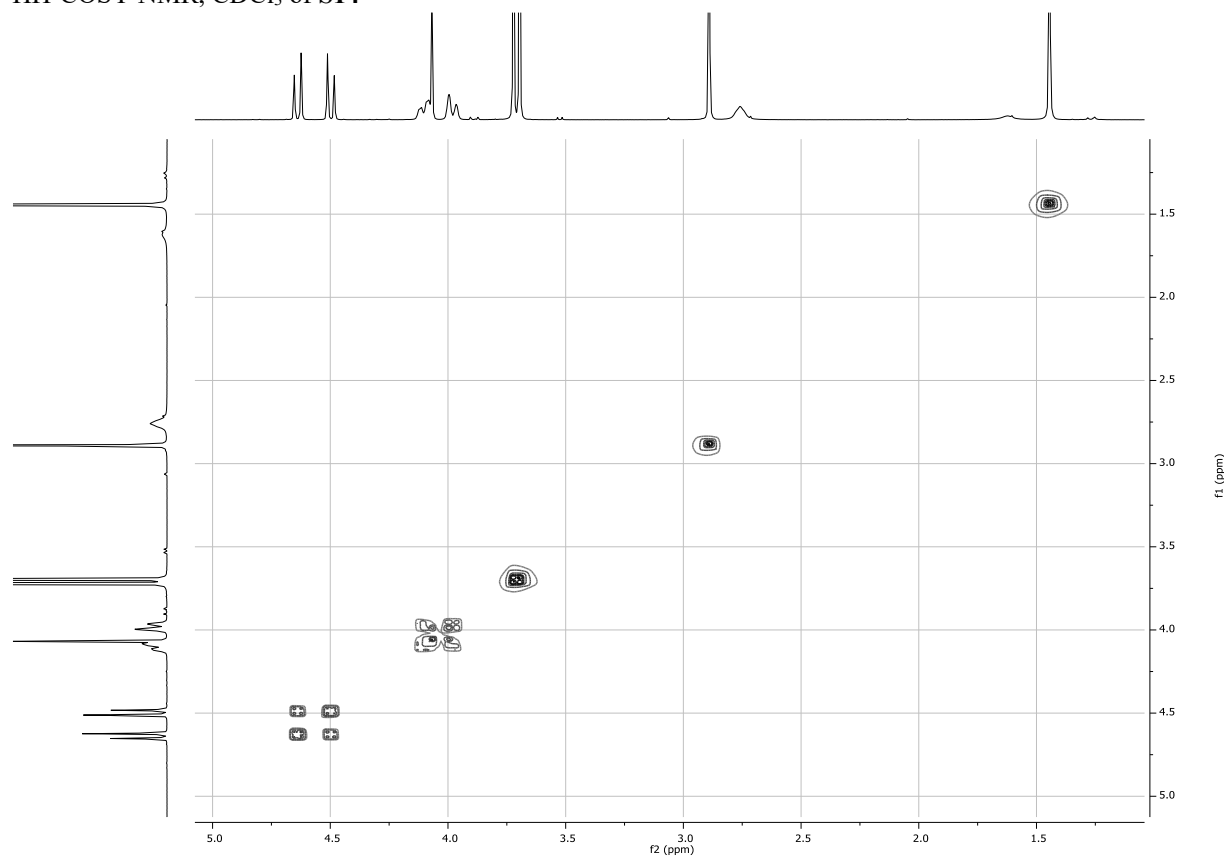

HSQC NMR, CDCl<sub>3</sub> of **S14**

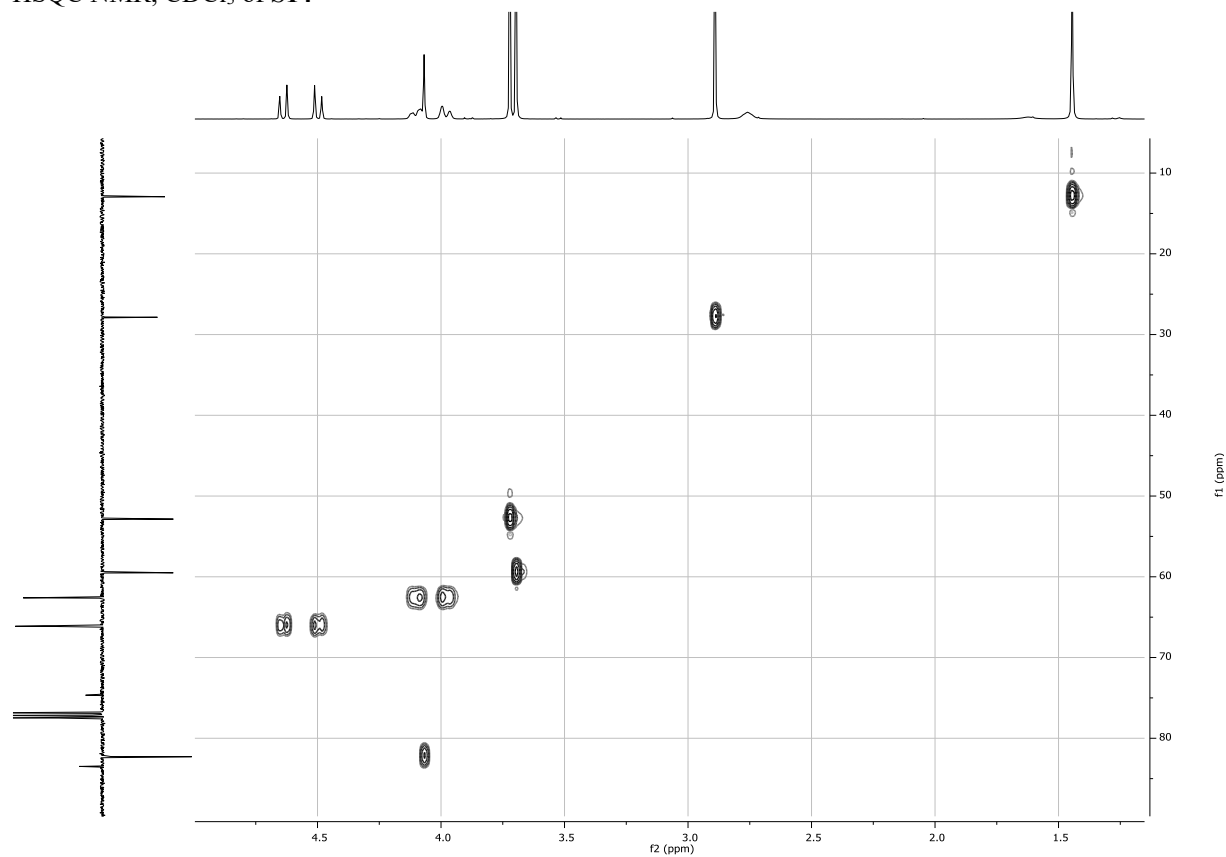

<sup>1</sup>H NMR, 400 MHz, CDCl<sub>3</sub> of **S15**

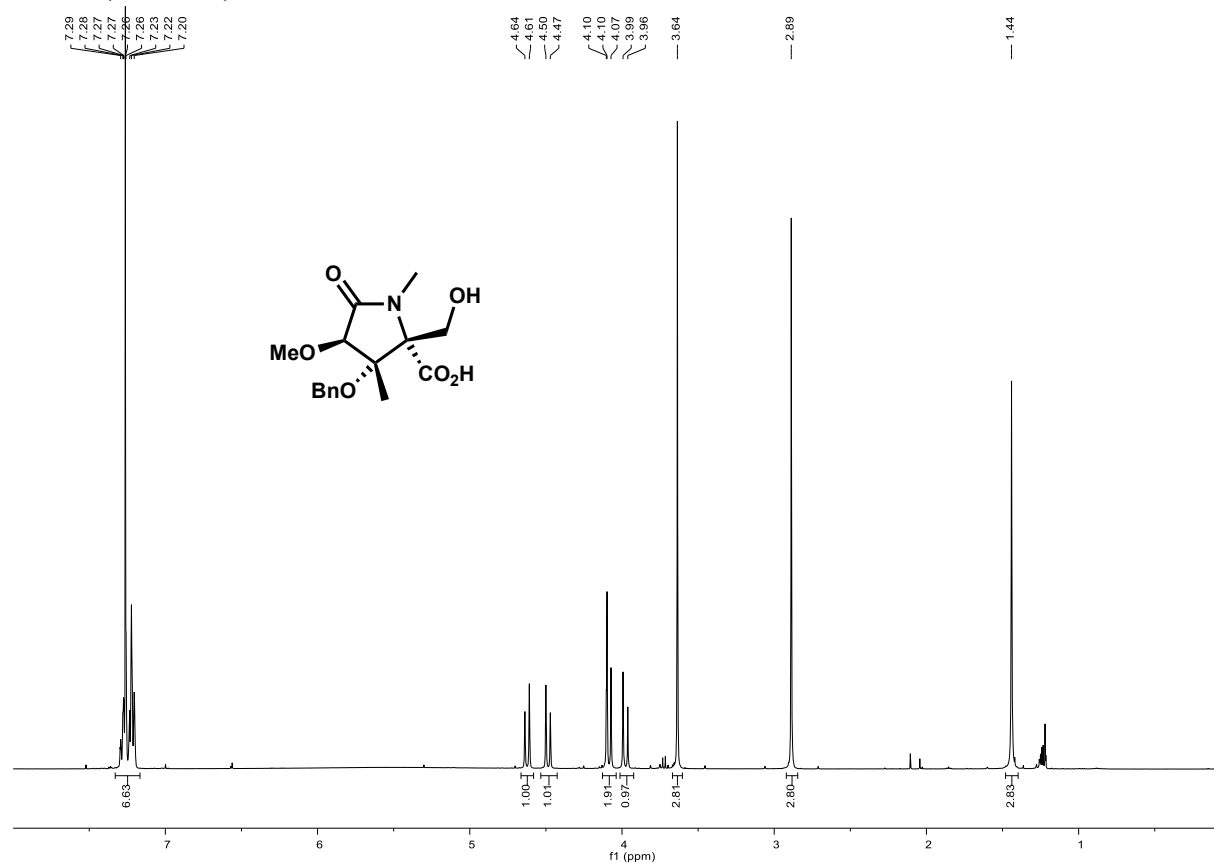

$^{13}\text{C}$  NMR, 101 MHz,  $\text{CDCl}_3$  of **S15**

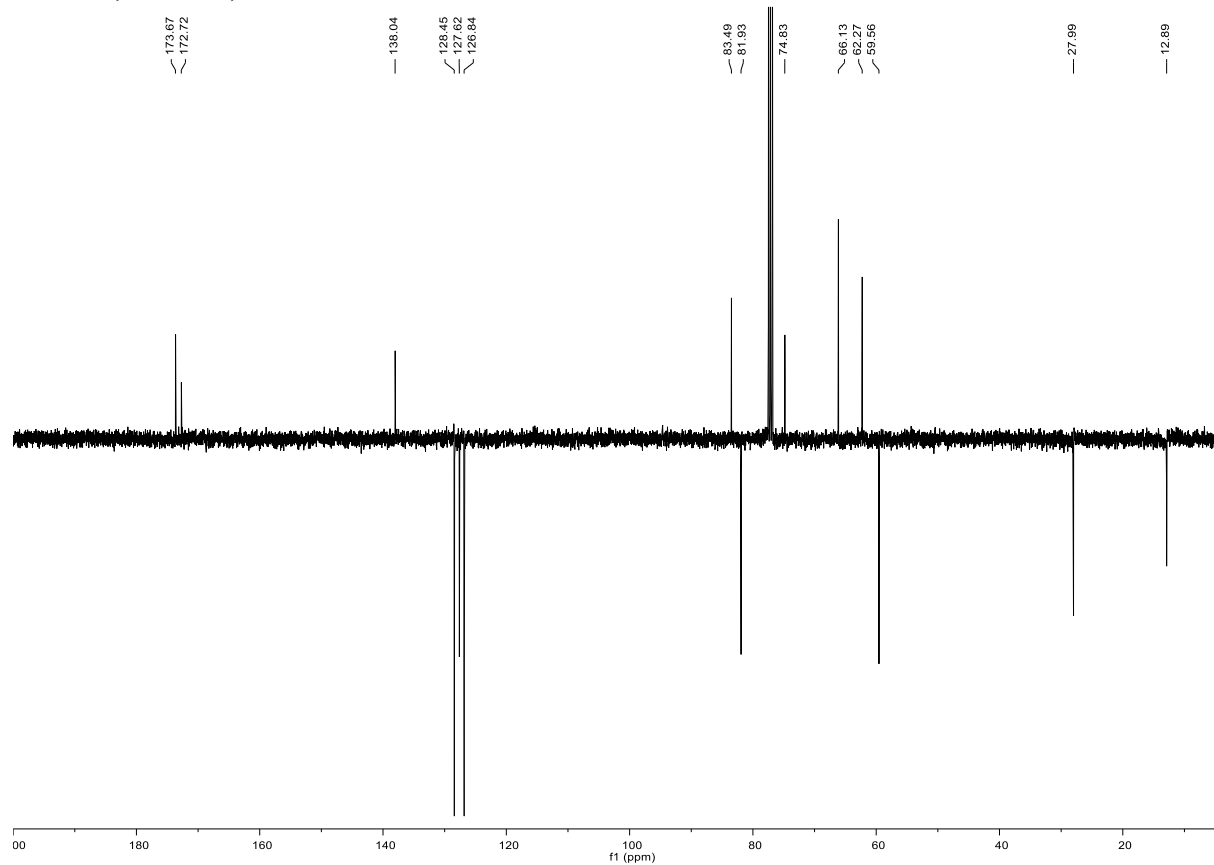

HH-COSY NMR,  $\text{CDCl}_3$  of **S15**

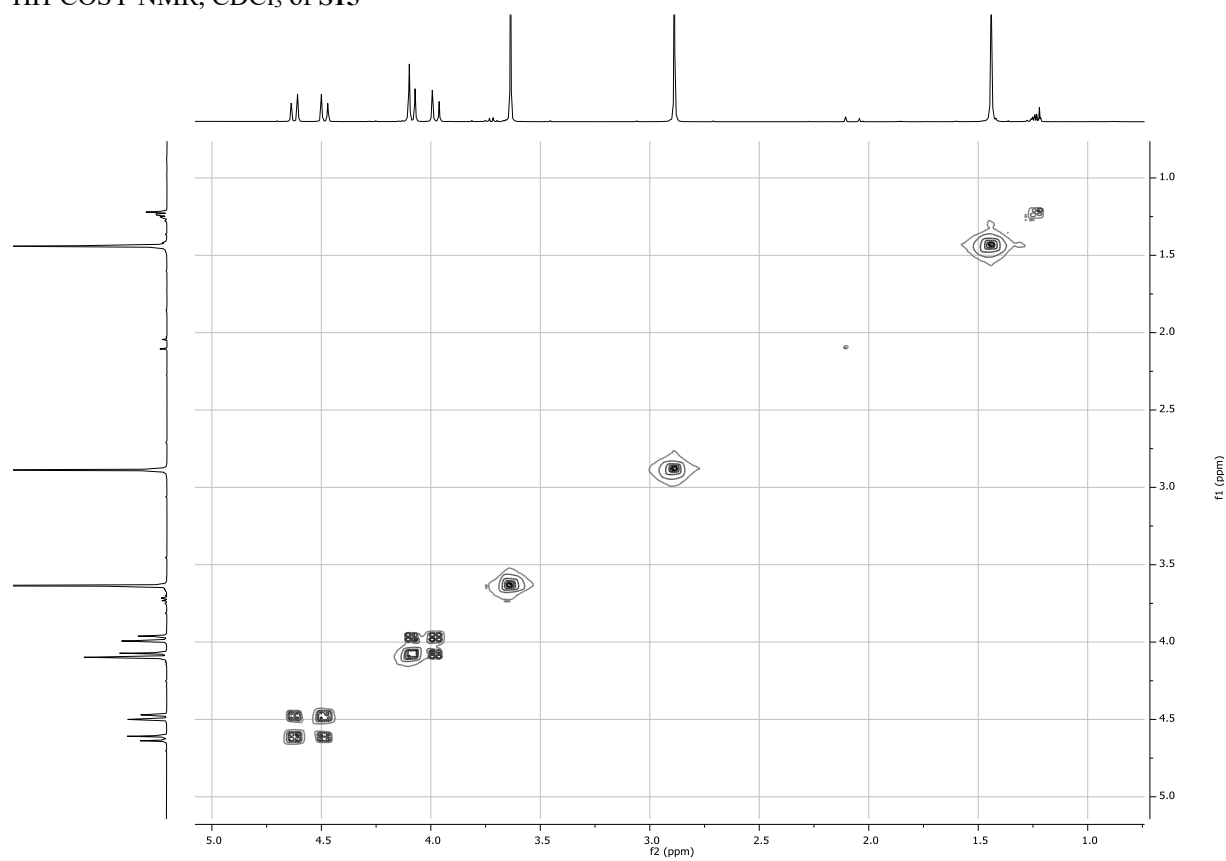

HSQC NMR, CDCl<sub>3</sub> of S15

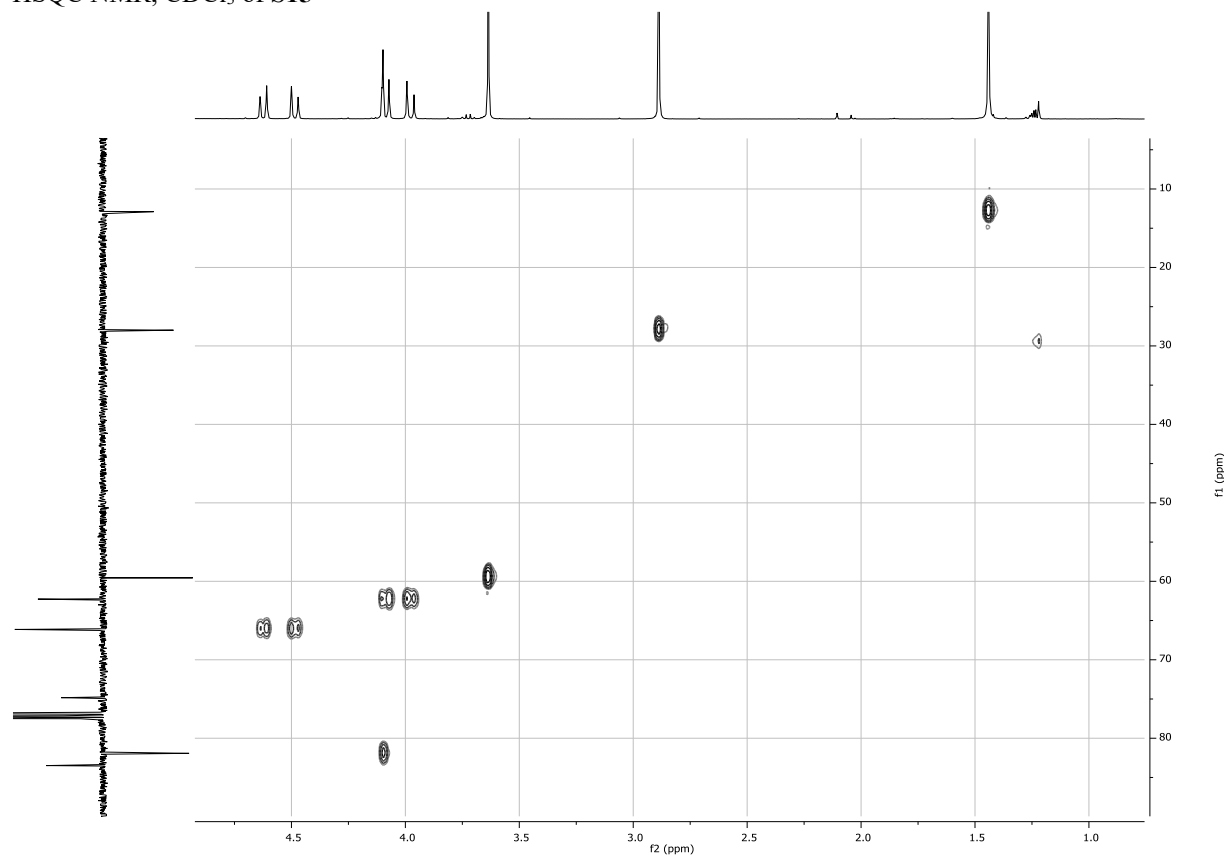

<sup>1</sup>H NMR, 400 MHz, CDCl<sub>3</sub> of S16

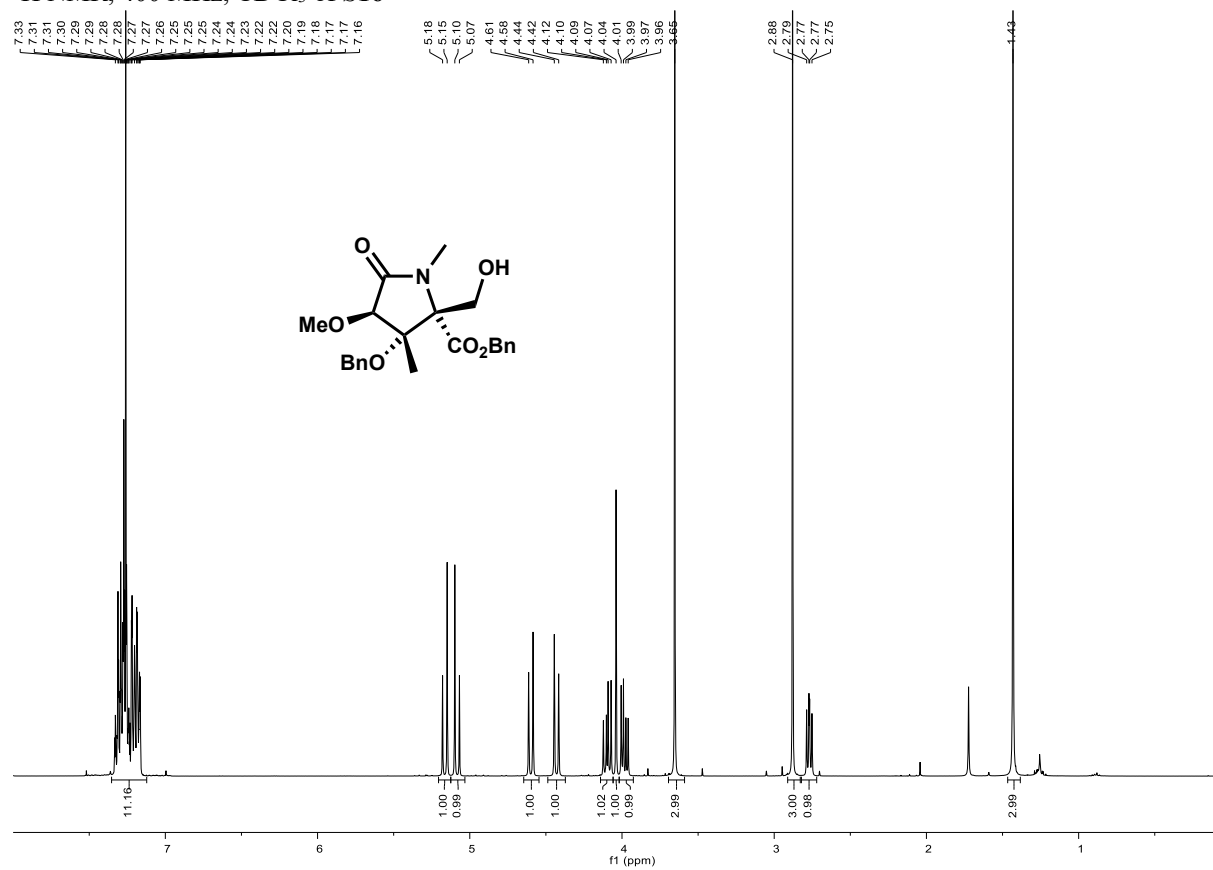

<sup>13</sup>C NMR, 101 MHz, CDCl<sub>3</sub> of S16

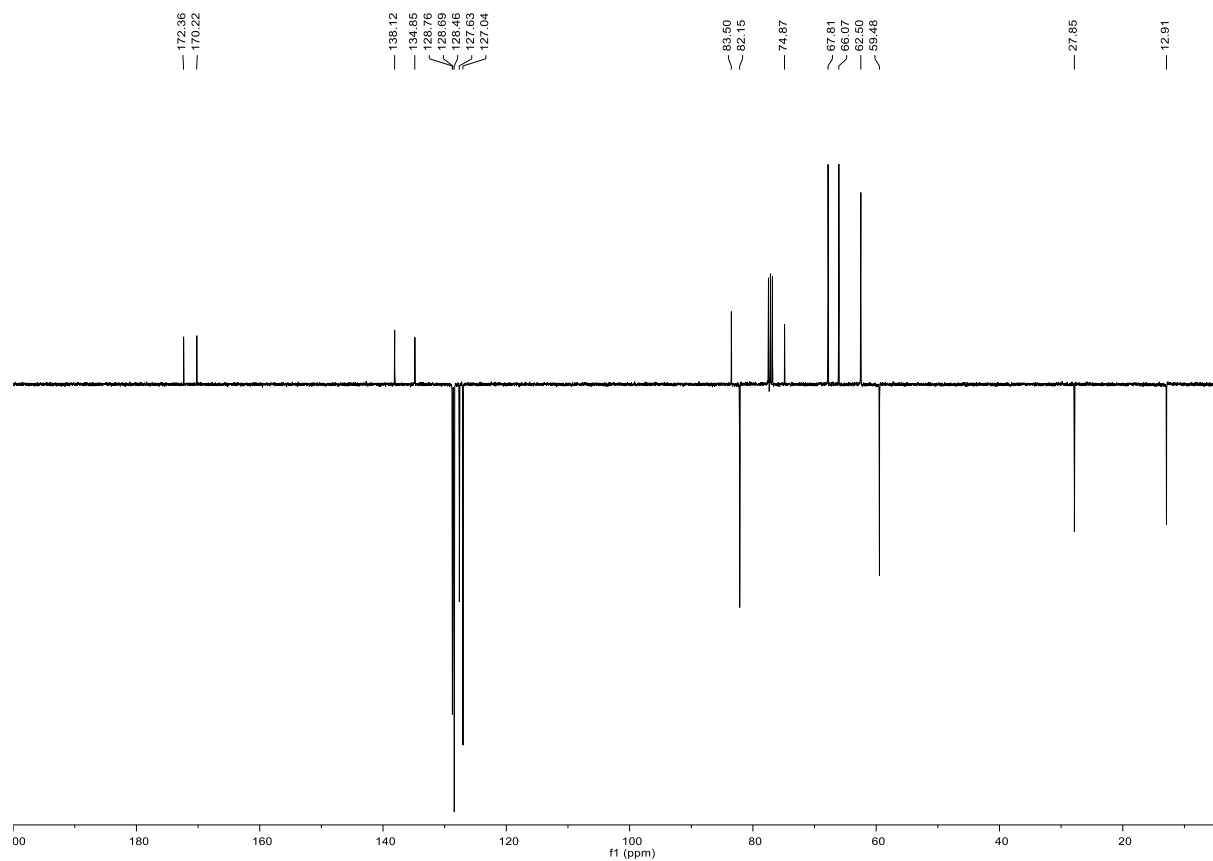

HH-COSY NMR, CDCl<sub>3</sub> of S16

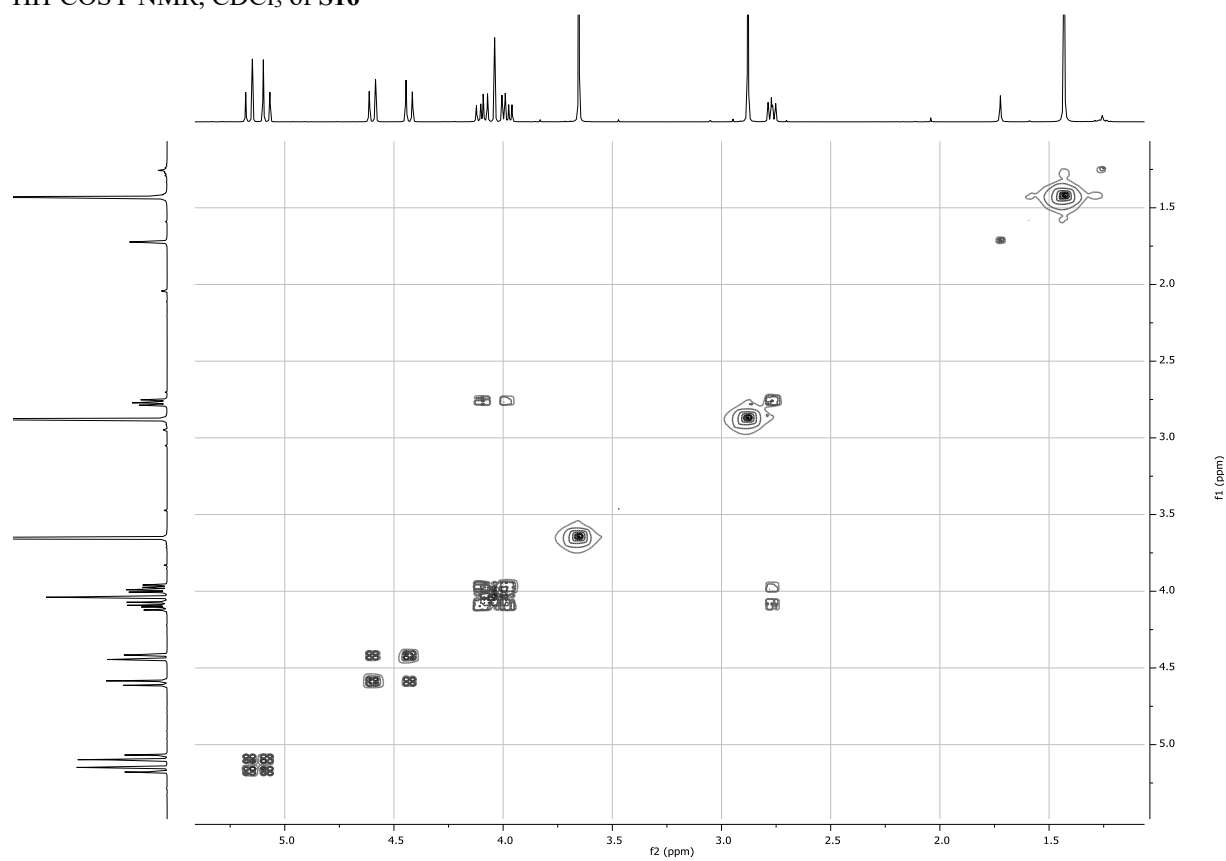

HSQC NMR, CDCl<sub>3</sub> of **S16**

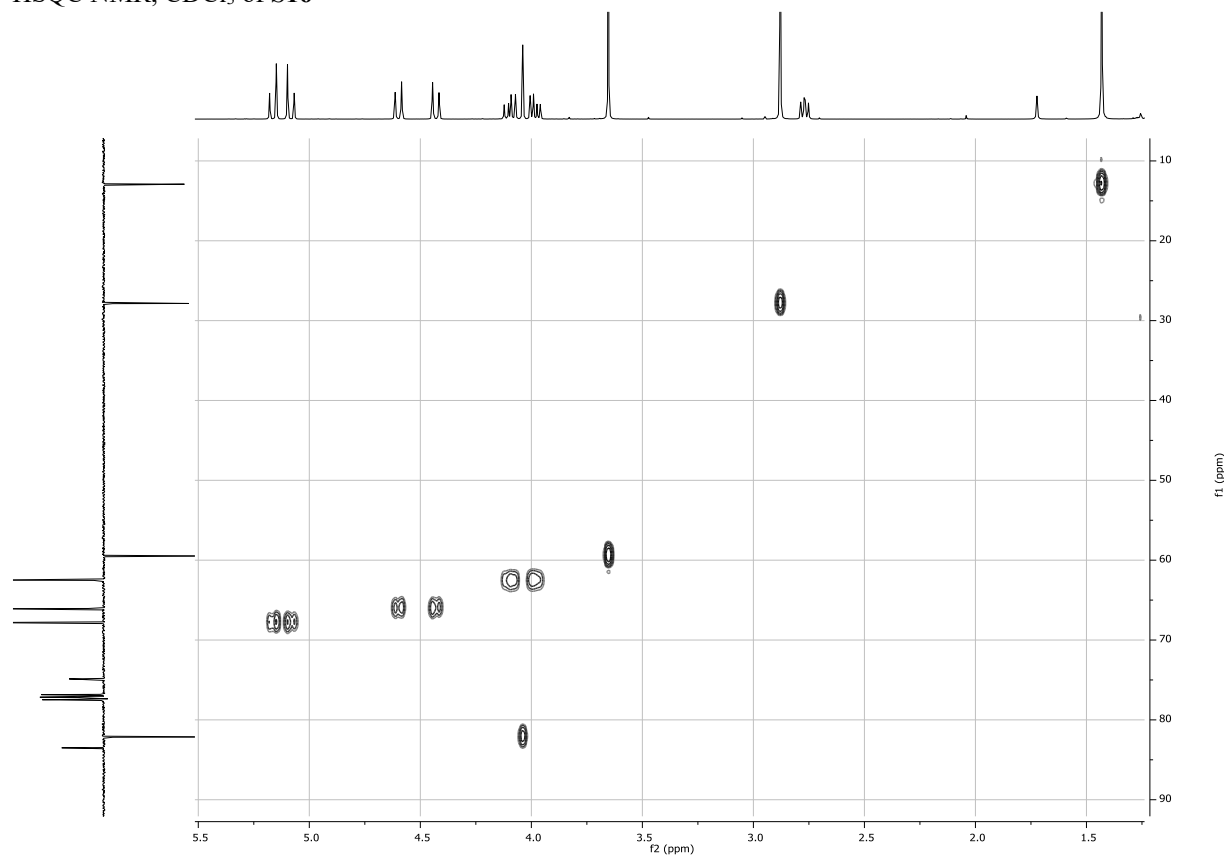

<sup>1</sup>H NMR, 400 MHz, CDCl<sub>3</sub> of **S17**

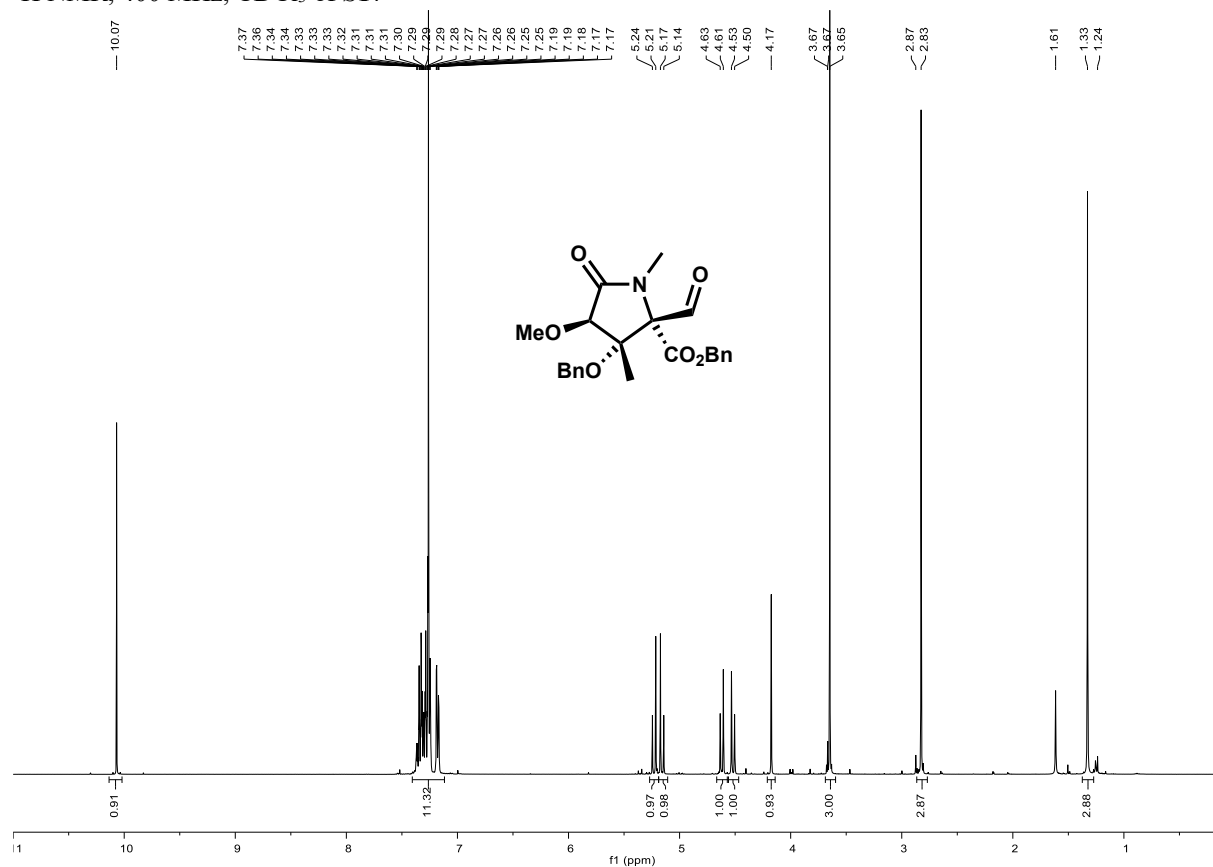

<sup>13</sup>C NMR, 101 MHz, CDCl<sub>3</sub> of S17

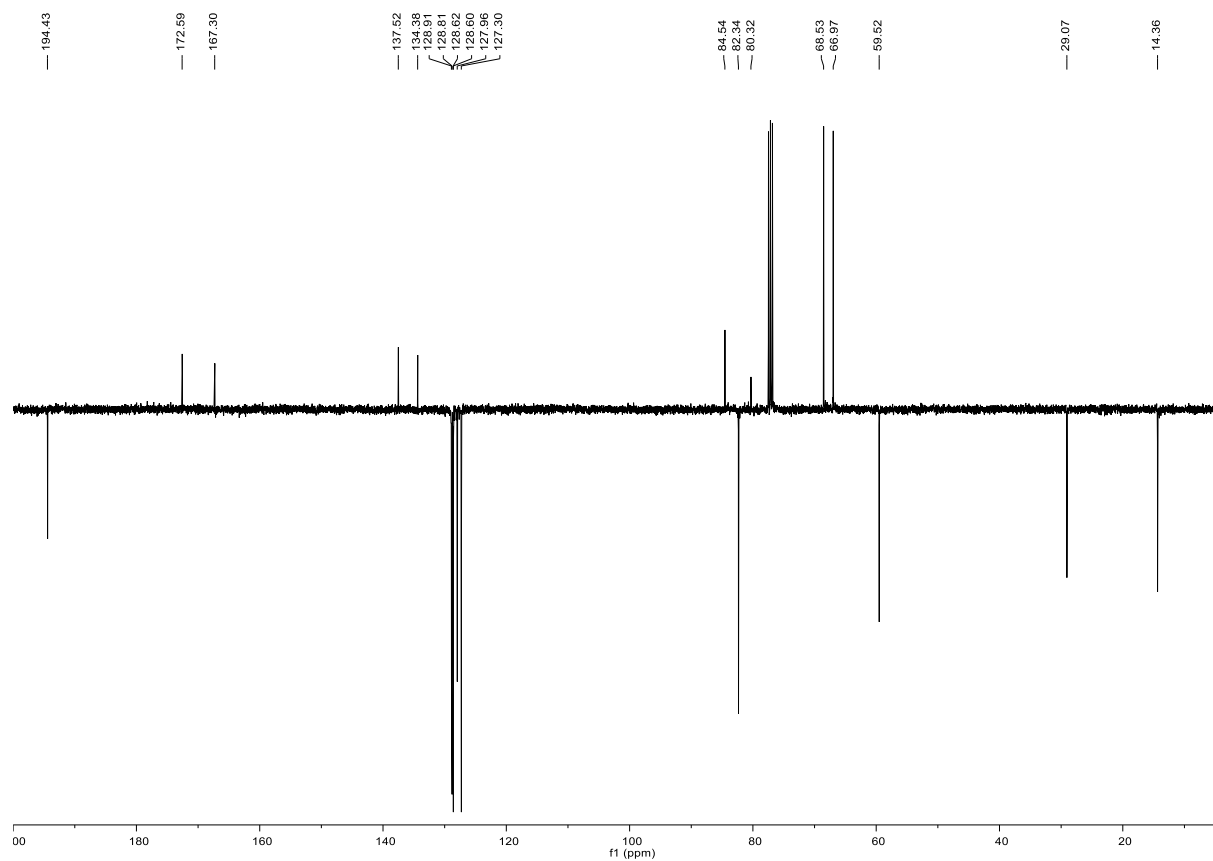

HH-COSY NMR, CDCl<sub>3</sub> of S17

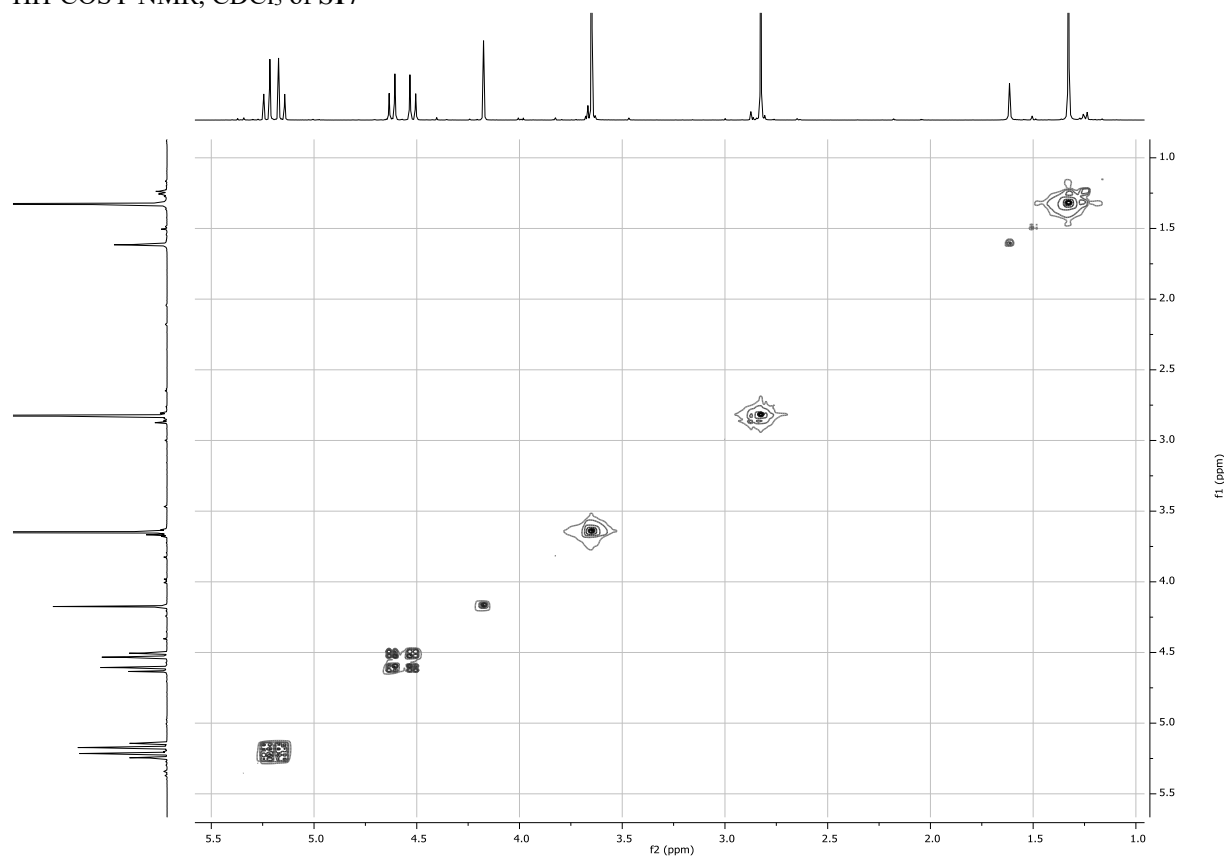



HSQC NMR, CDCl<sub>3</sub> of **S17**

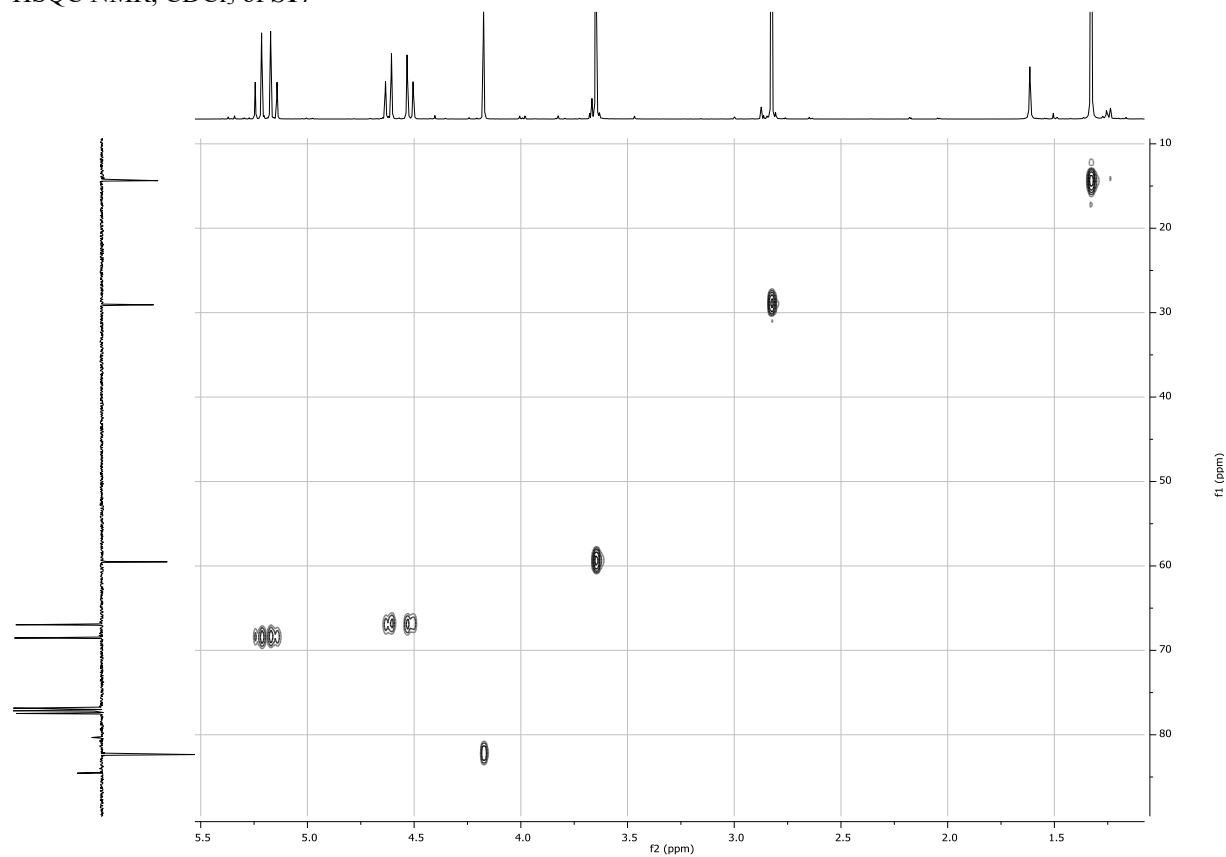

<sup>1</sup>H NMR, 400 MHz, CDCl<sub>3</sub> of **2**

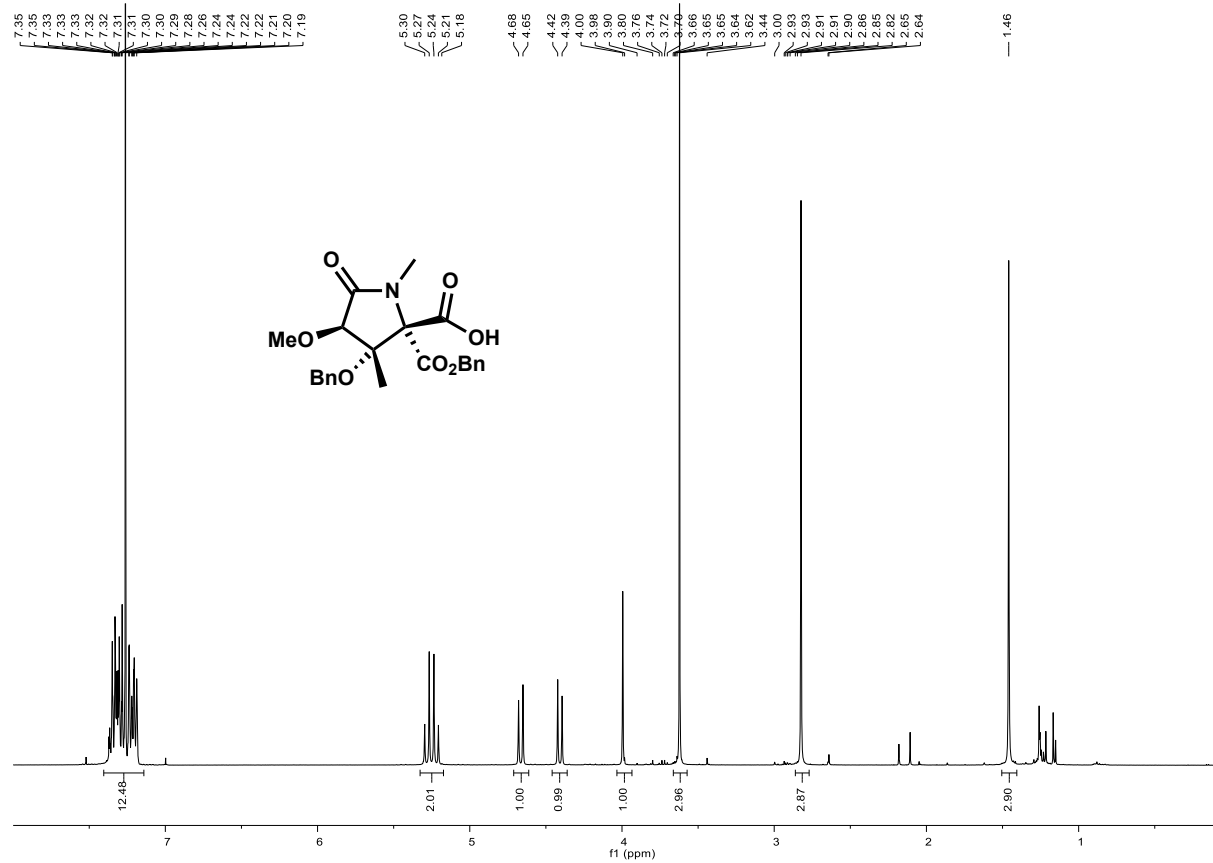

<sup>13</sup>C NMR, 101 MHz, CDCl<sub>3</sub> of **2**

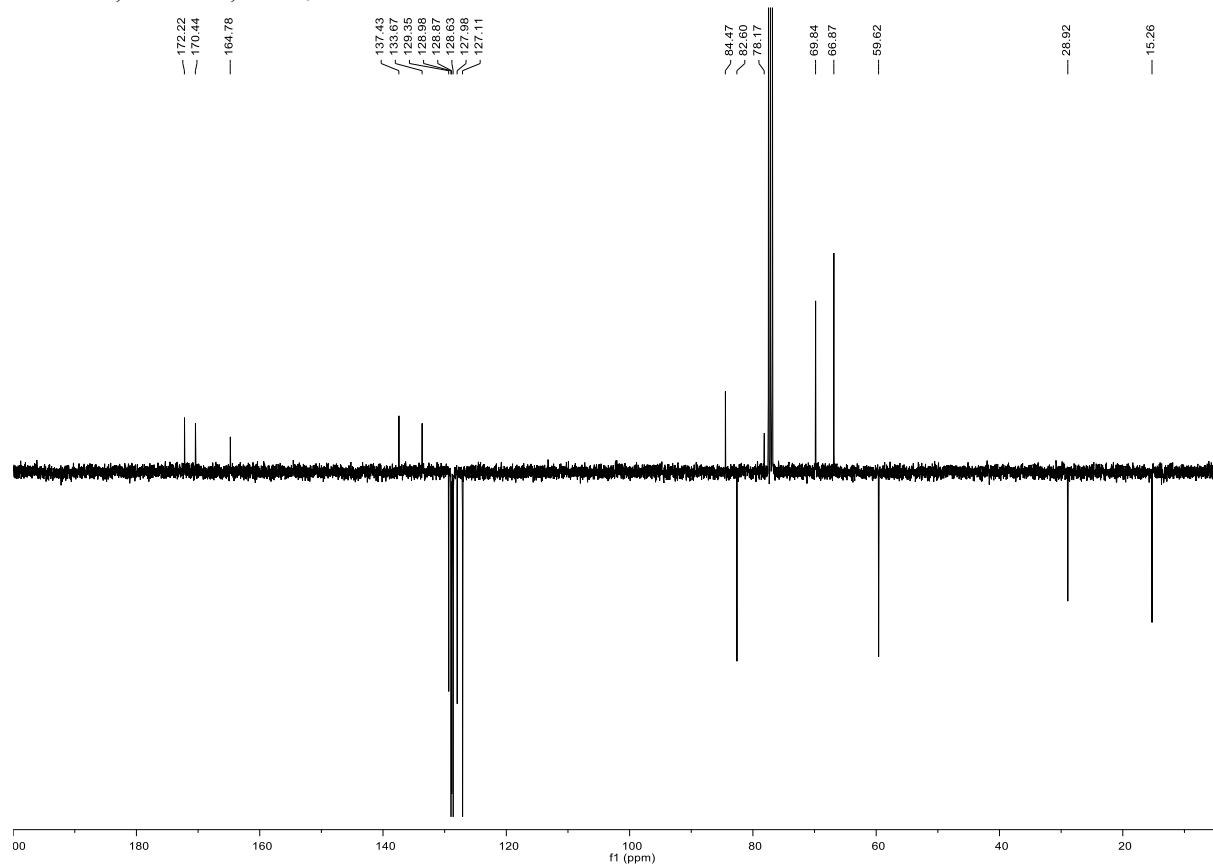

HH-COSY NMR, CDCl<sub>3</sub> of **2**

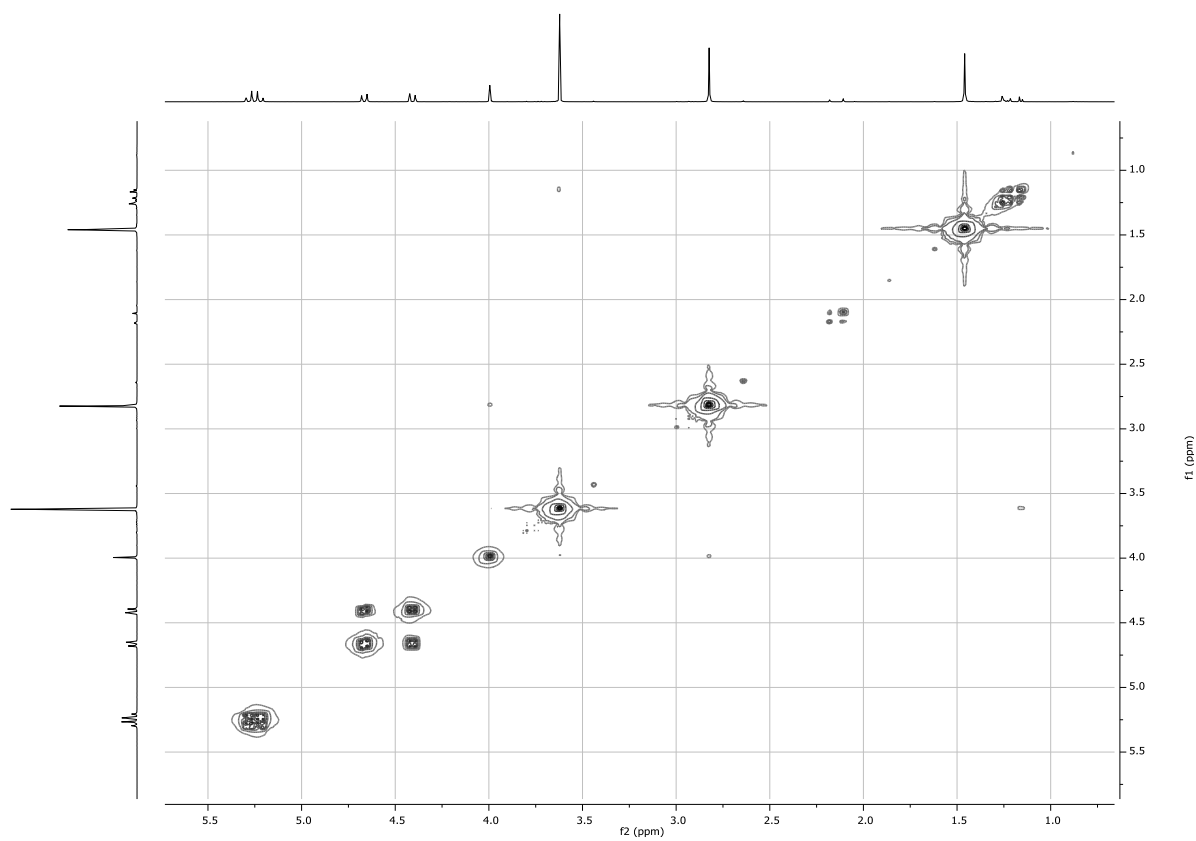

HSQC NMR, CDCl<sub>3</sub> of **2**

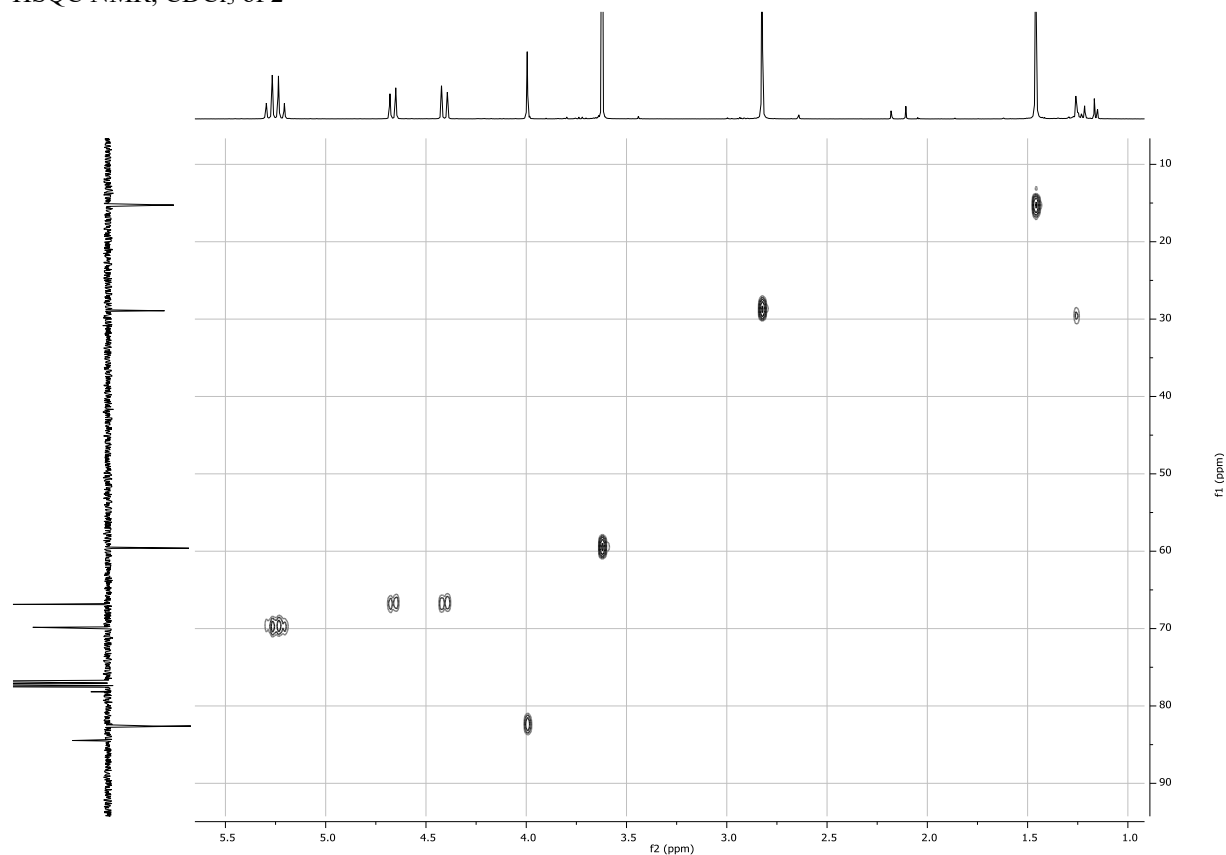

<sup>1</sup>H NMR, 400 MHz, CDCl<sub>3</sub> of **S18**

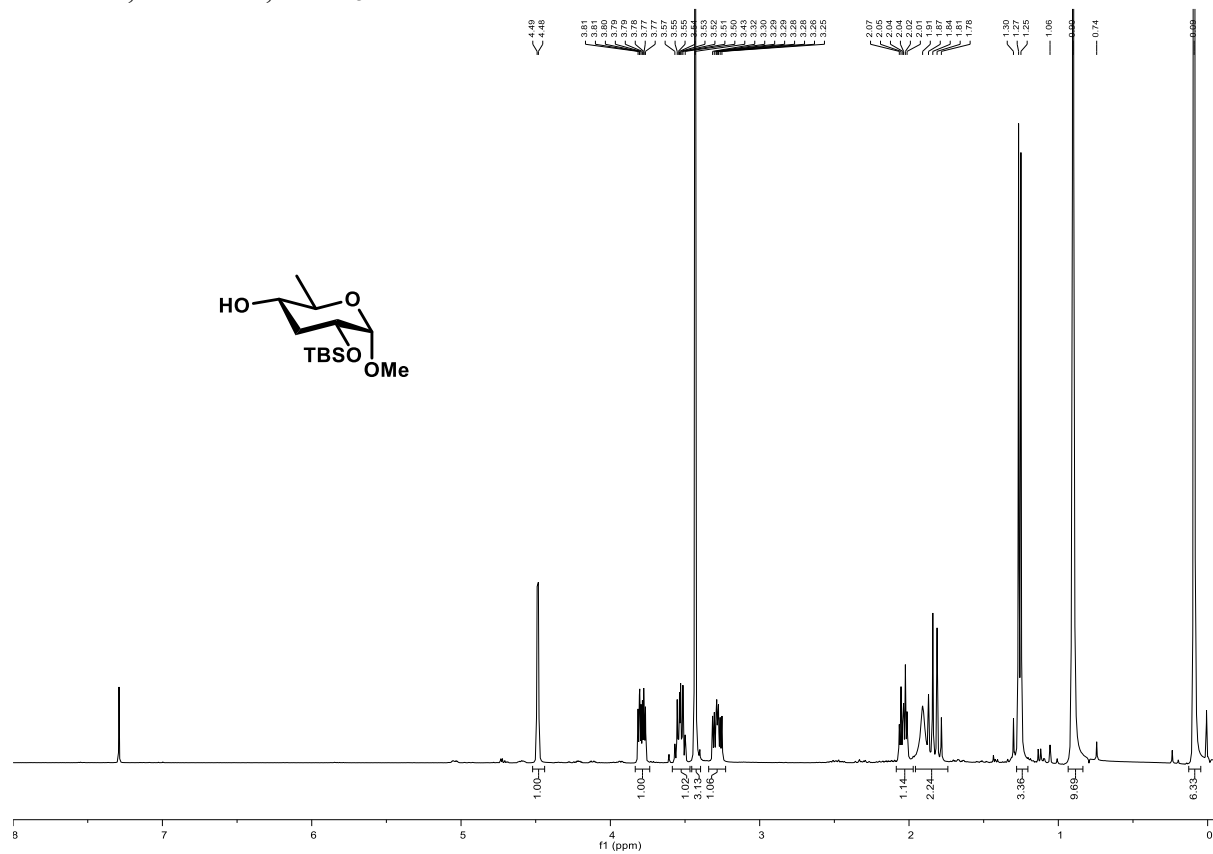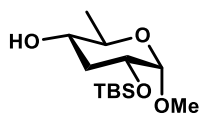

$^{13}\text{C}$  NMR, 101 MHz,  $\text{CDCl}_3$  of **S18**

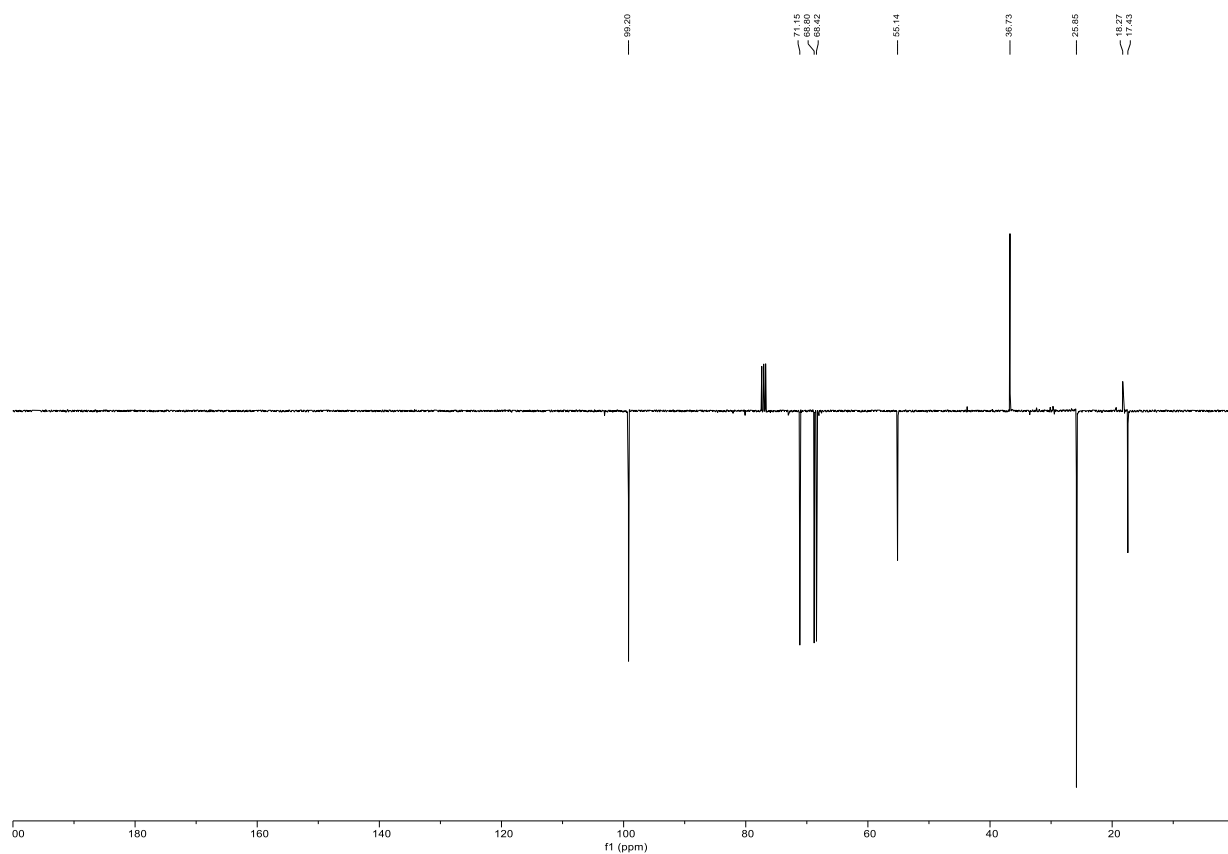

HH-COSY NMR,  $\text{CDCl}_3$  of **S18**

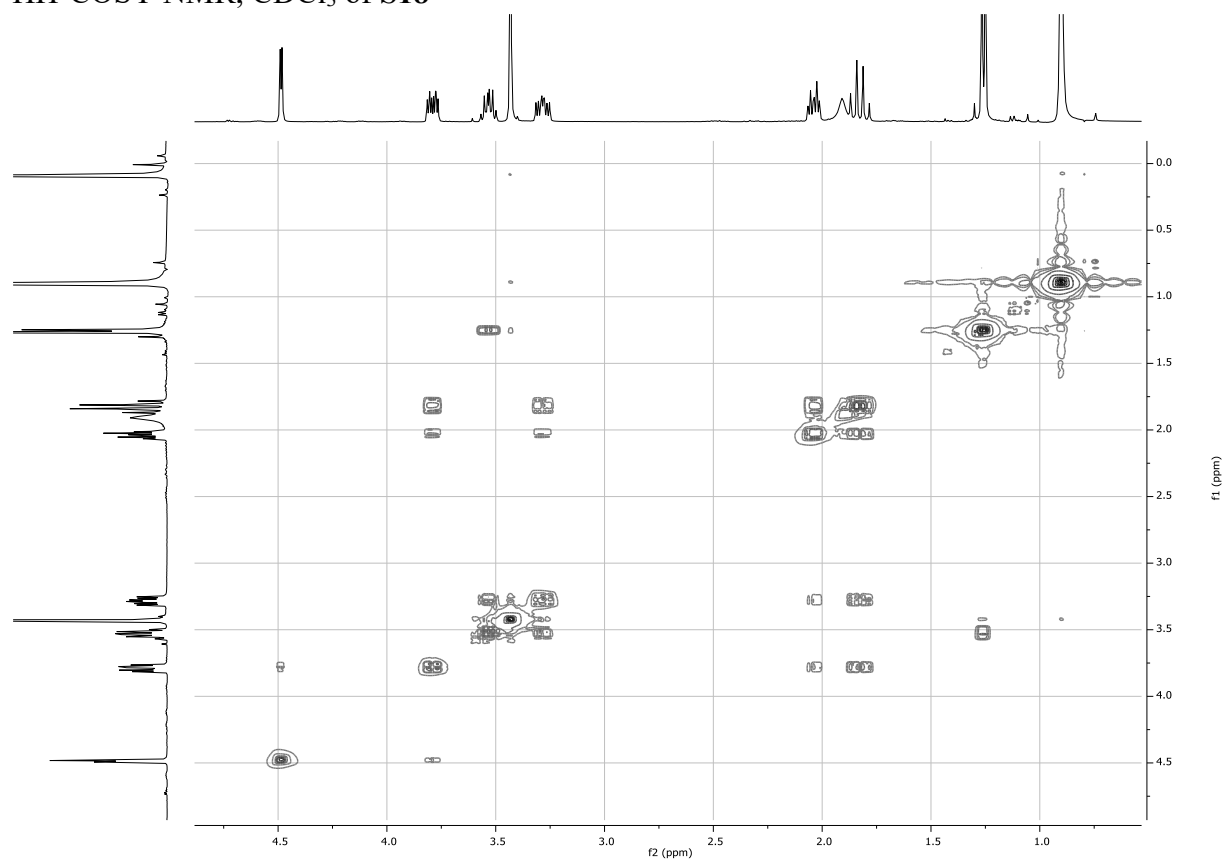

HSQC NMR, CDCl<sub>3</sub> of **S18**

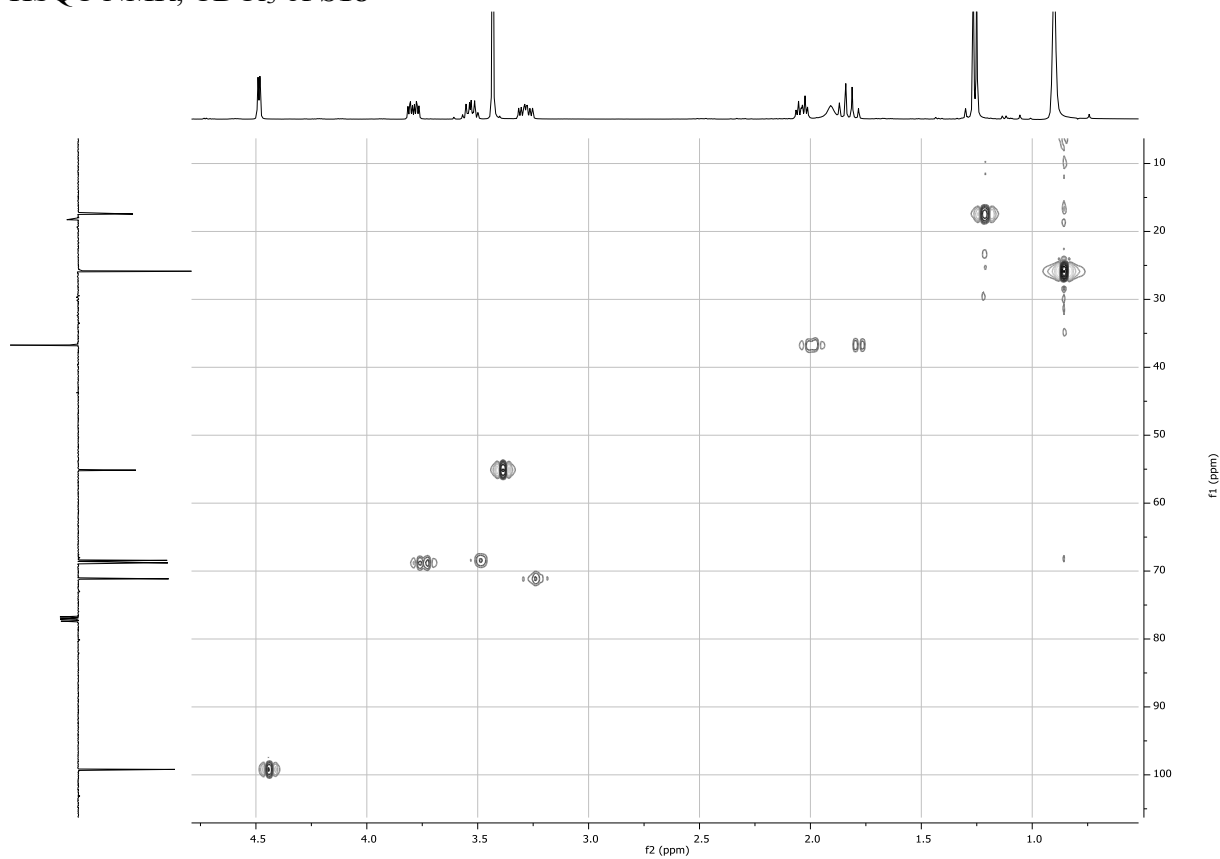

<sup>1</sup>H NMR, 400 MHz, CDCl<sub>3</sub> of **S19**

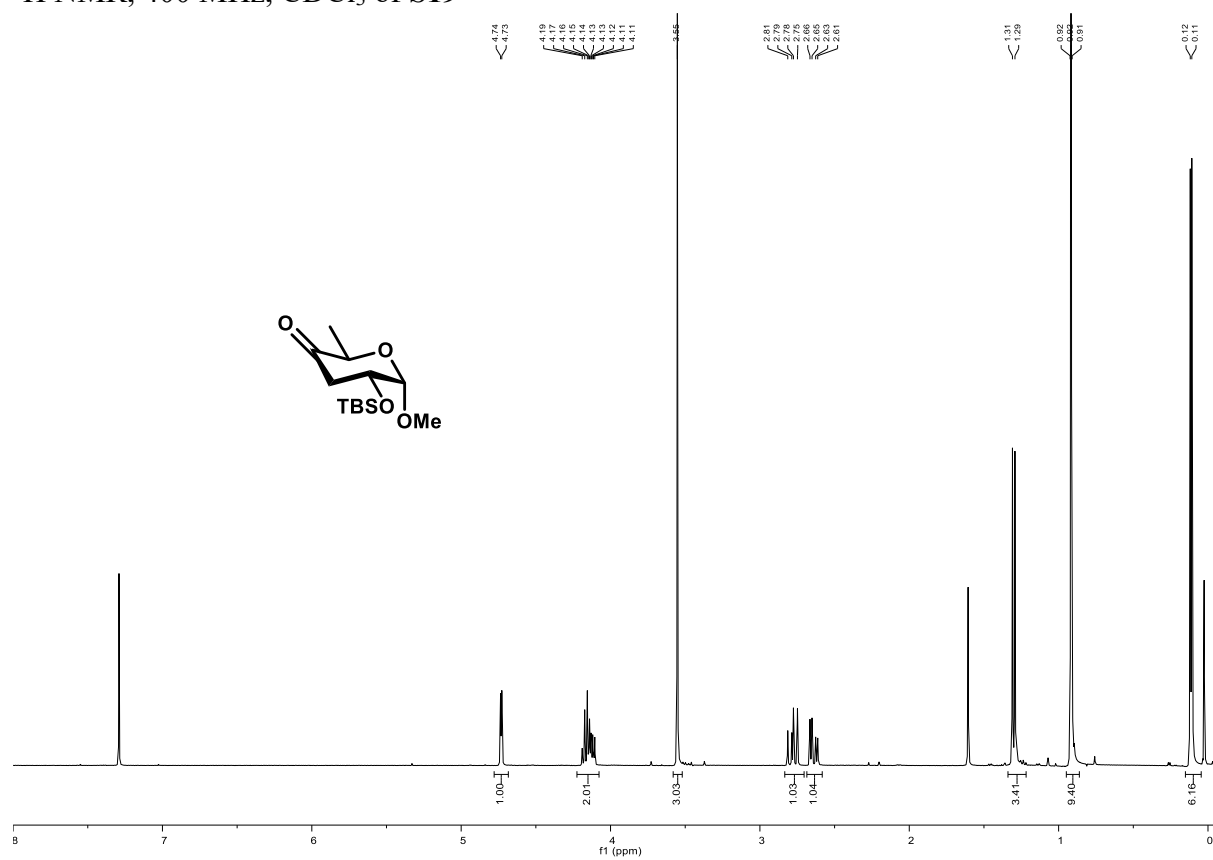

$^{13}\text{C}$  NMR, 101 MHz,  $\text{CDCl}_3$  of **S19**

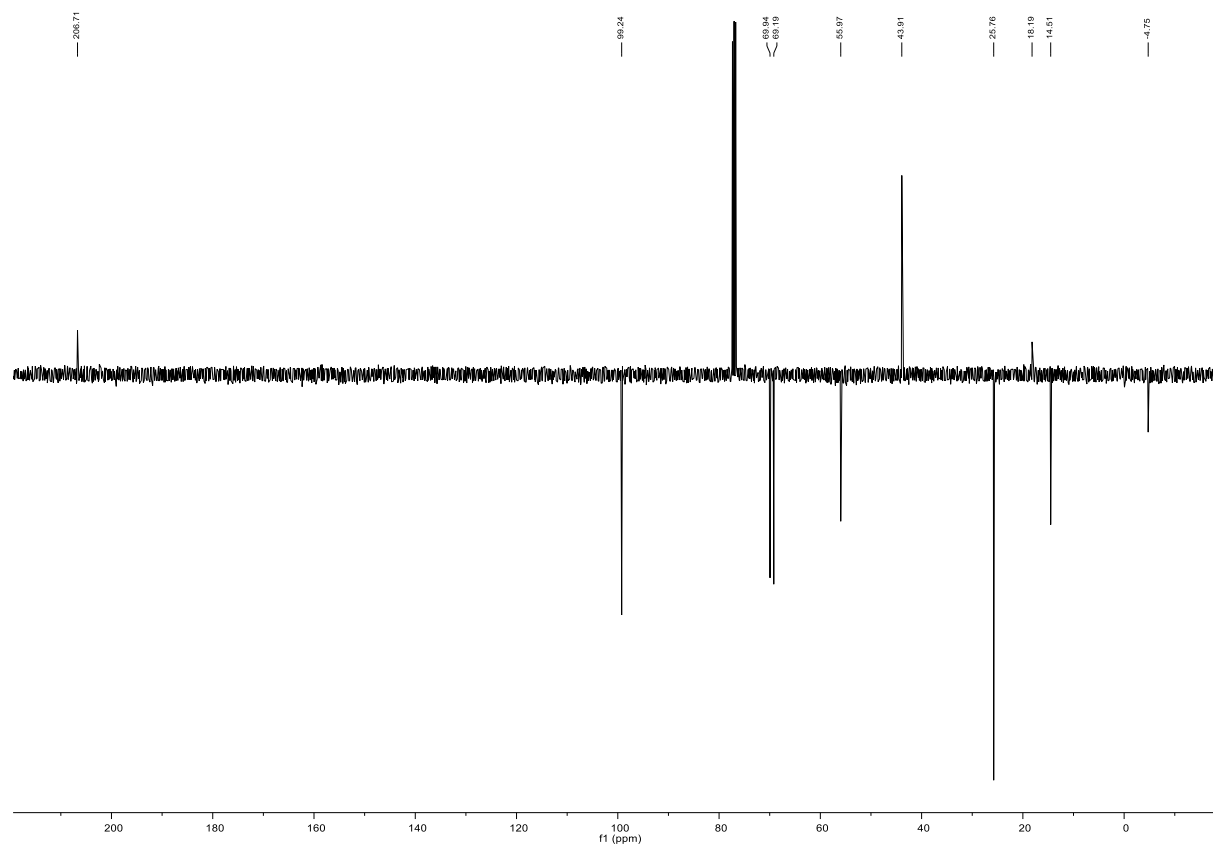

HH-COSY NMR,  $\text{CDCl}_3$  of **S19**

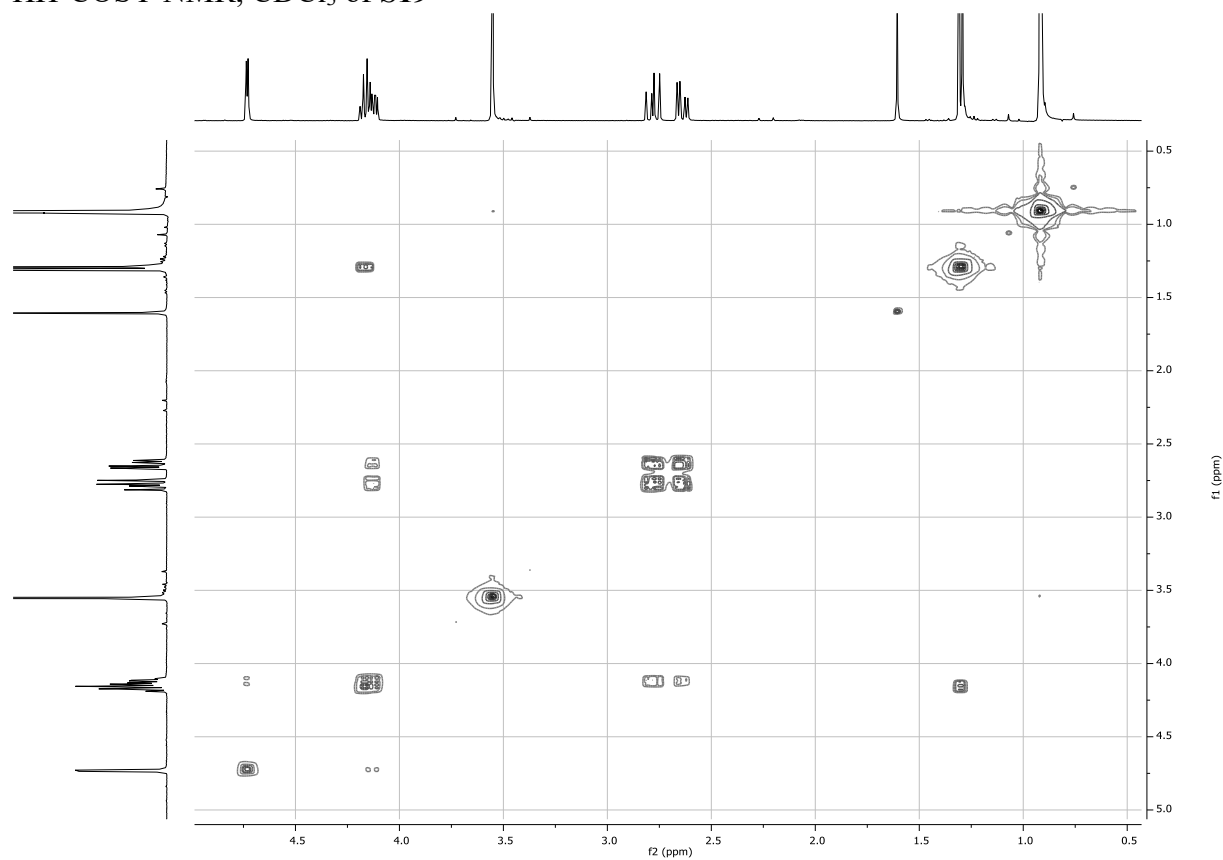

HSQC NMR, CDCl<sub>3</sub> of **S19**

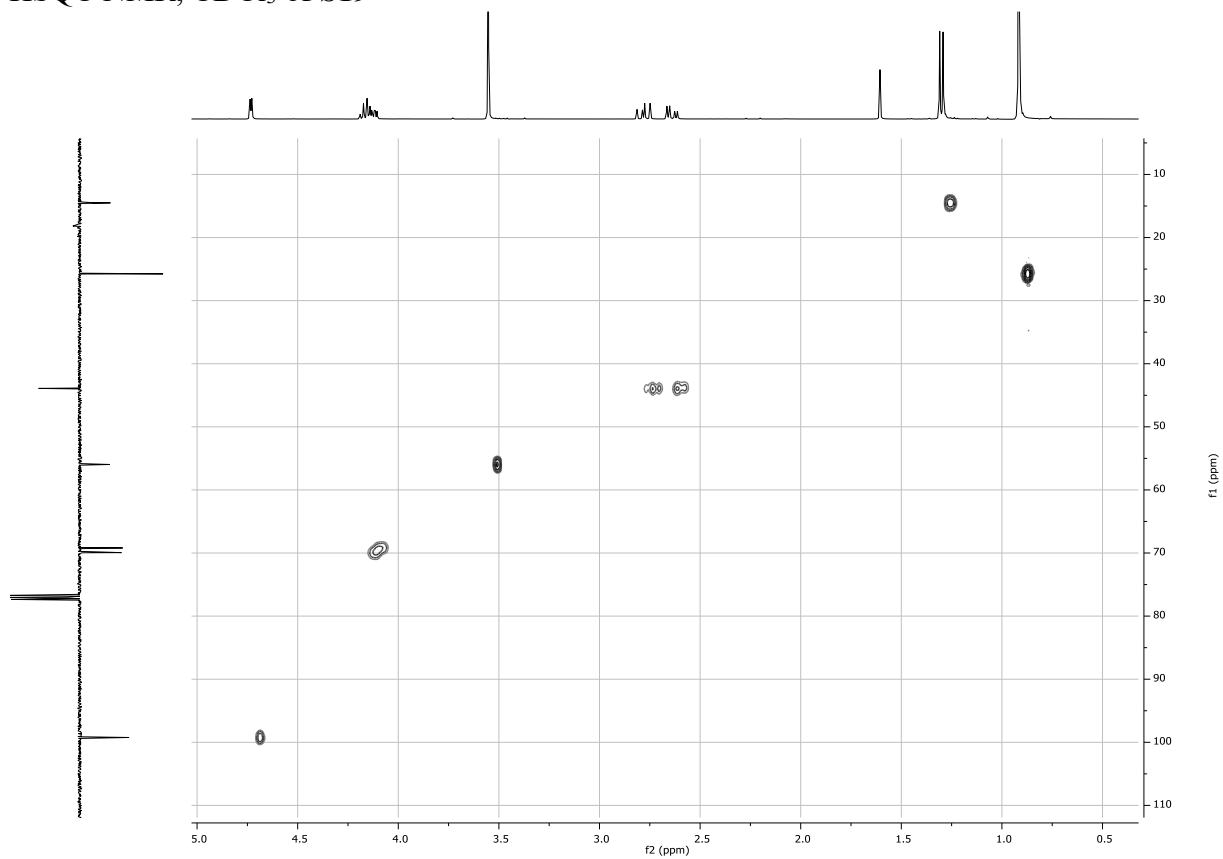

<sup>1</sup>H NMR, 400 MHz, CDCl<sub>3</sub> of **S20**

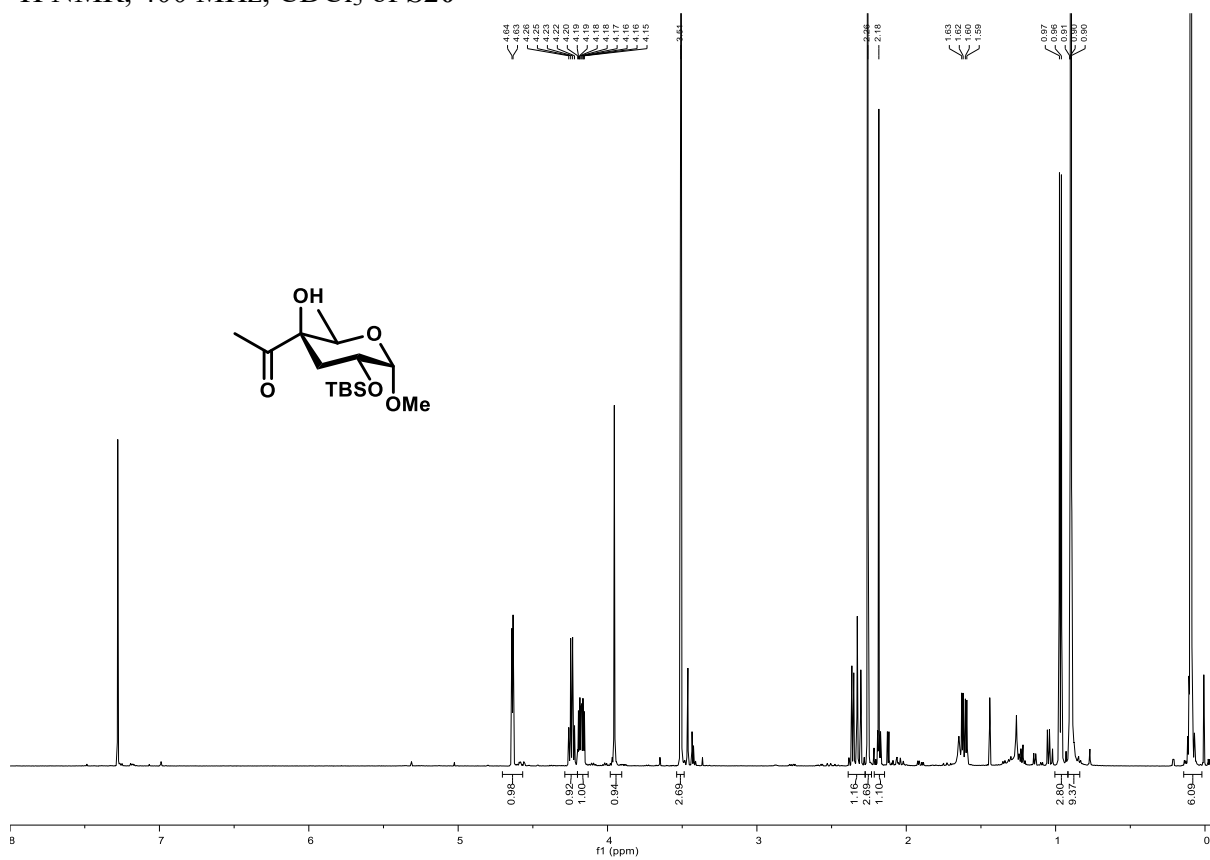

$^{13}\text{C}$  NMR, 101 MHz,  $\text{CDCl}_3$  of **S20**

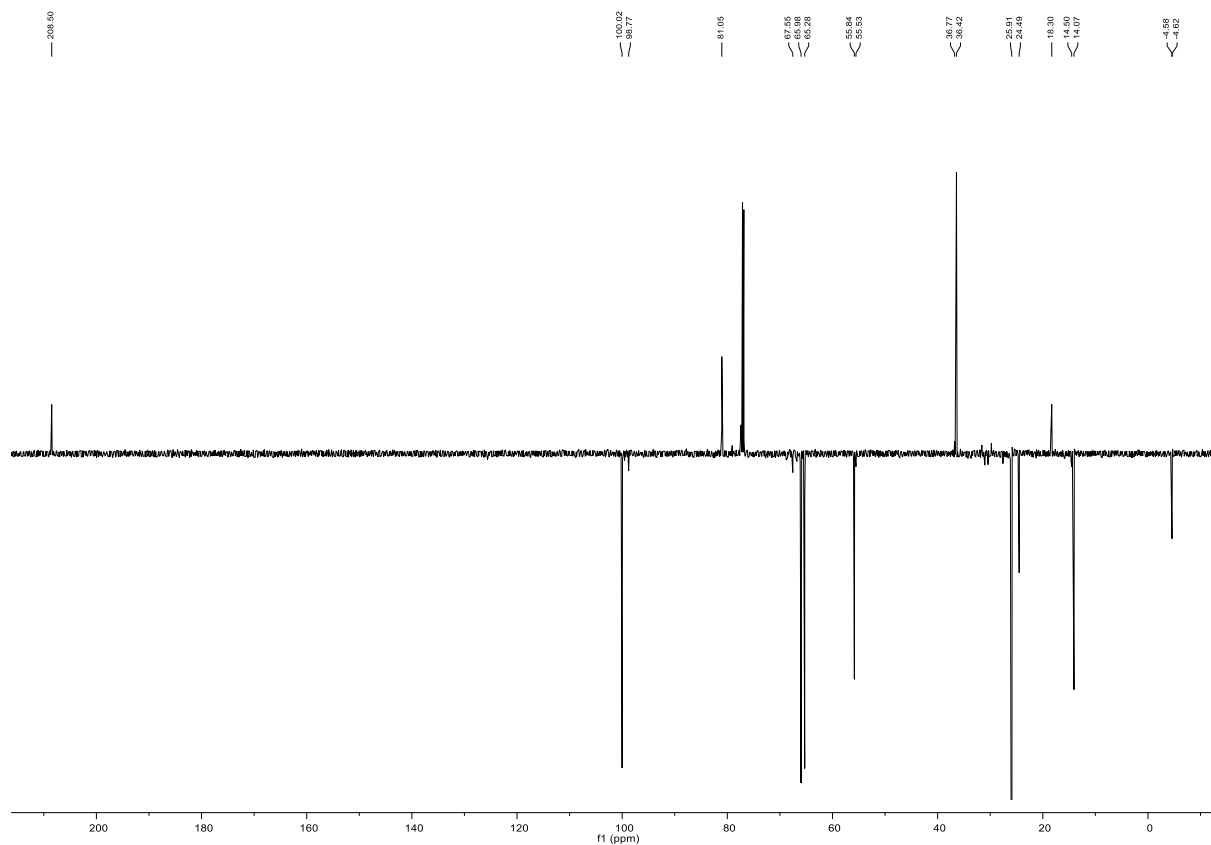

HH-COSY NMR,  $\text{CDCl}_3$  of **S20**

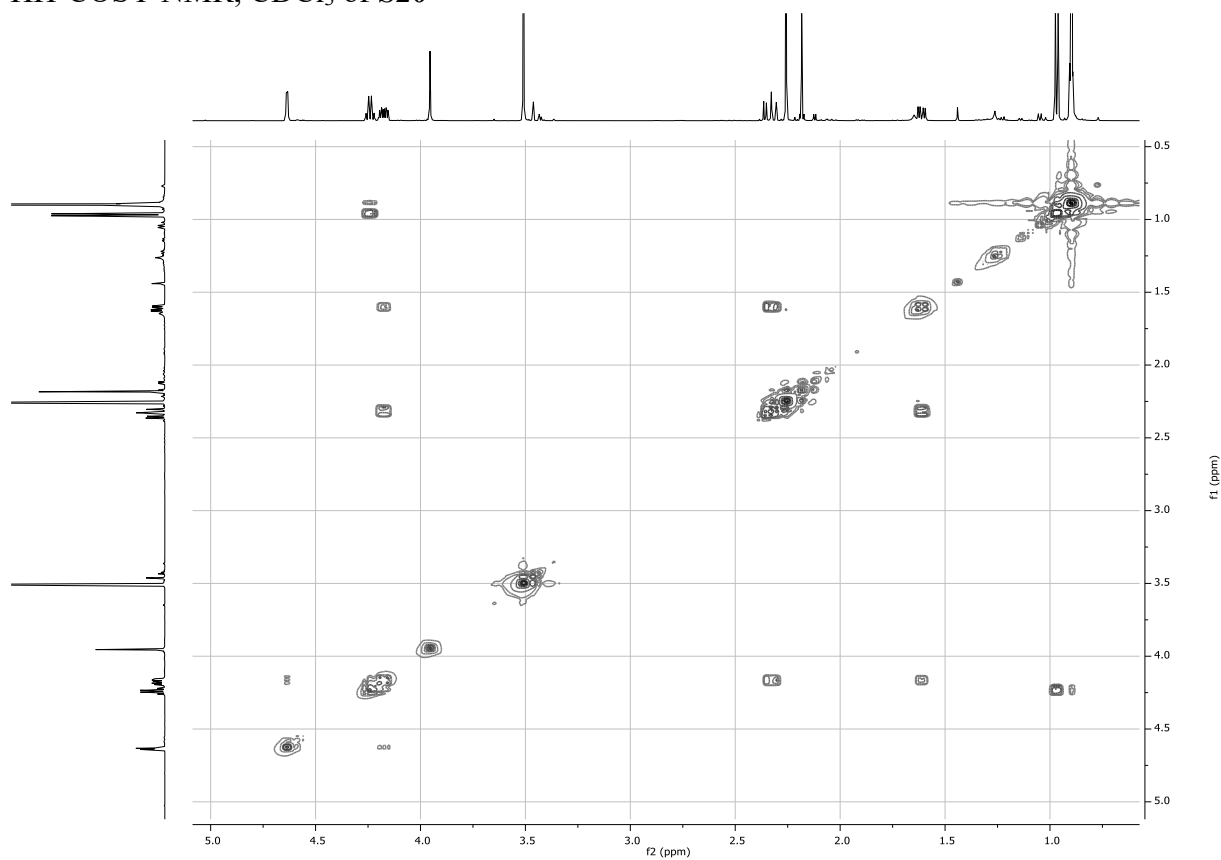



HSQC NMR, CDCl<sub>3</sub> of **S20**

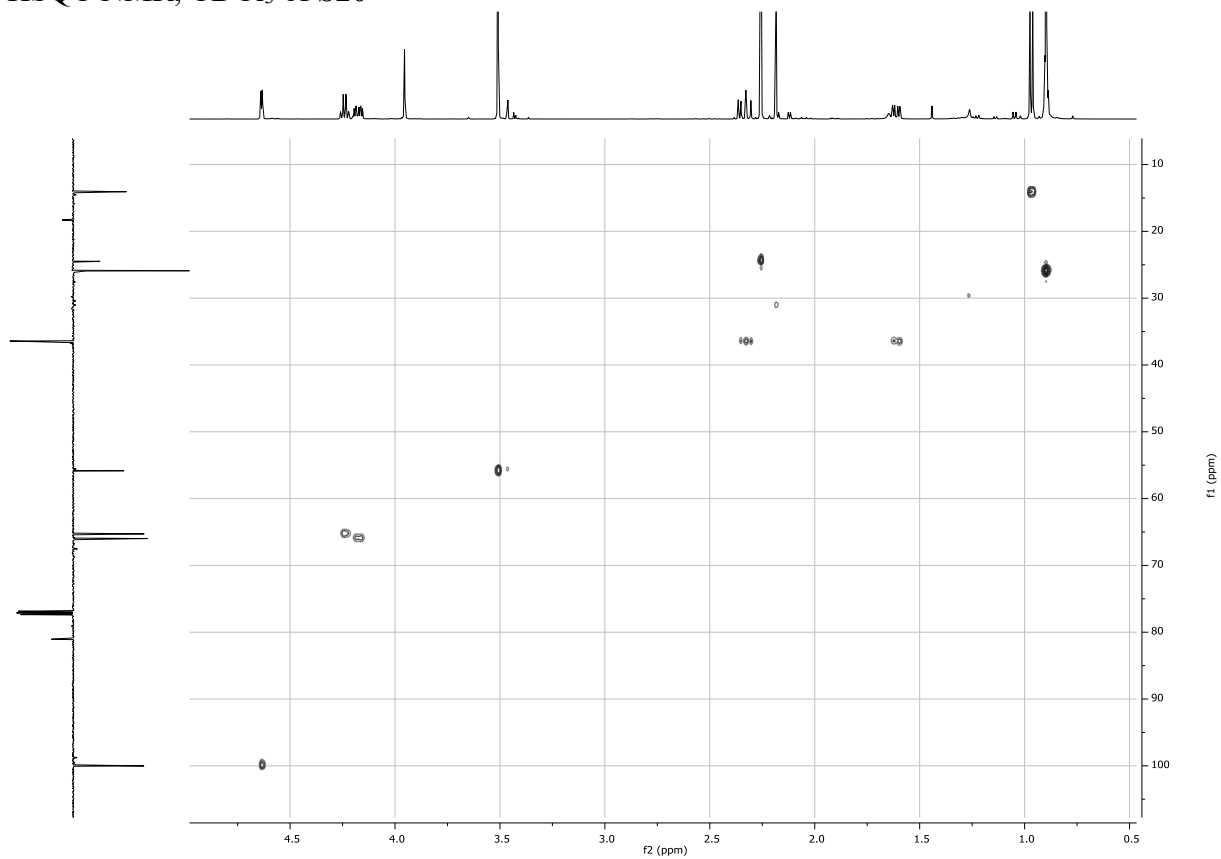

<sup>1</sup>H NMR, 400 MHz, CDCl<sub>3</sub> of **S21**

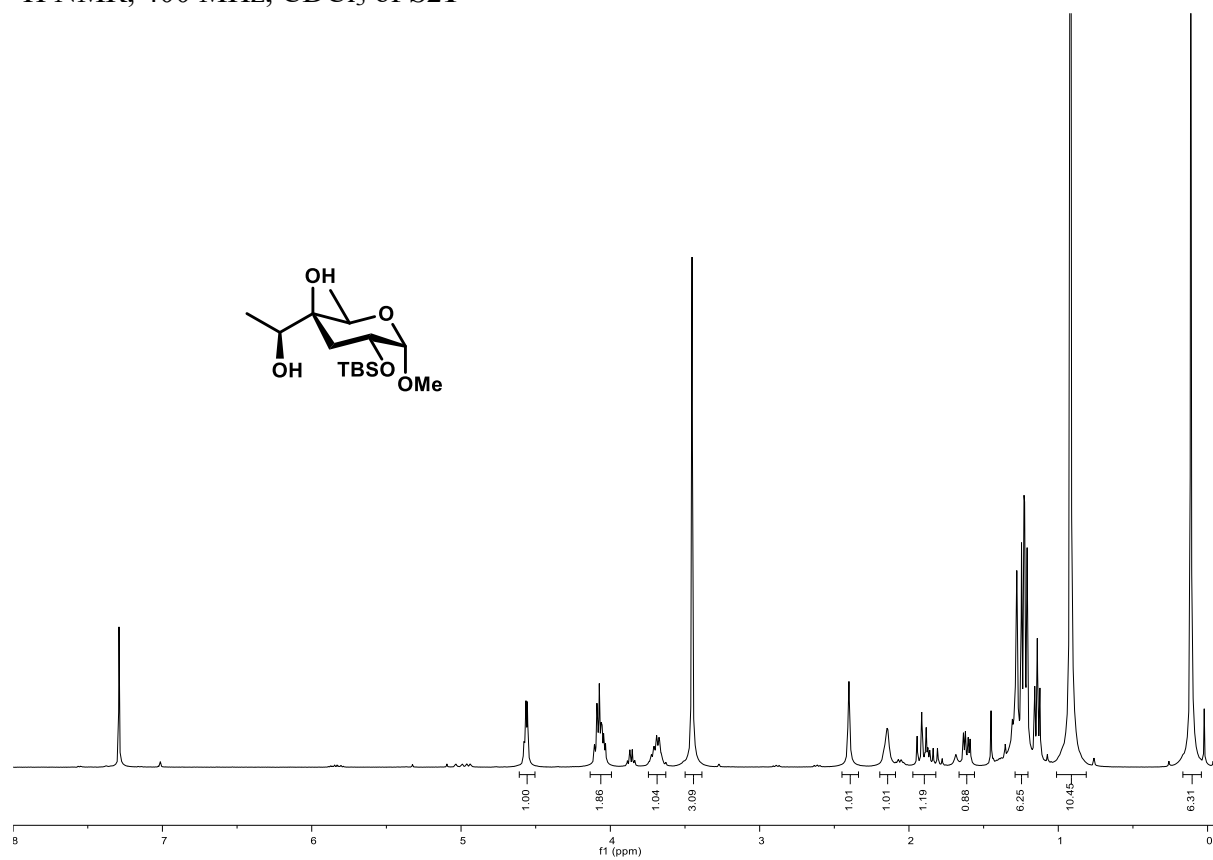

$^{13}\text{C}$  NMR, 101 MHz,  $\text{CDCl}_3$  of **S21**

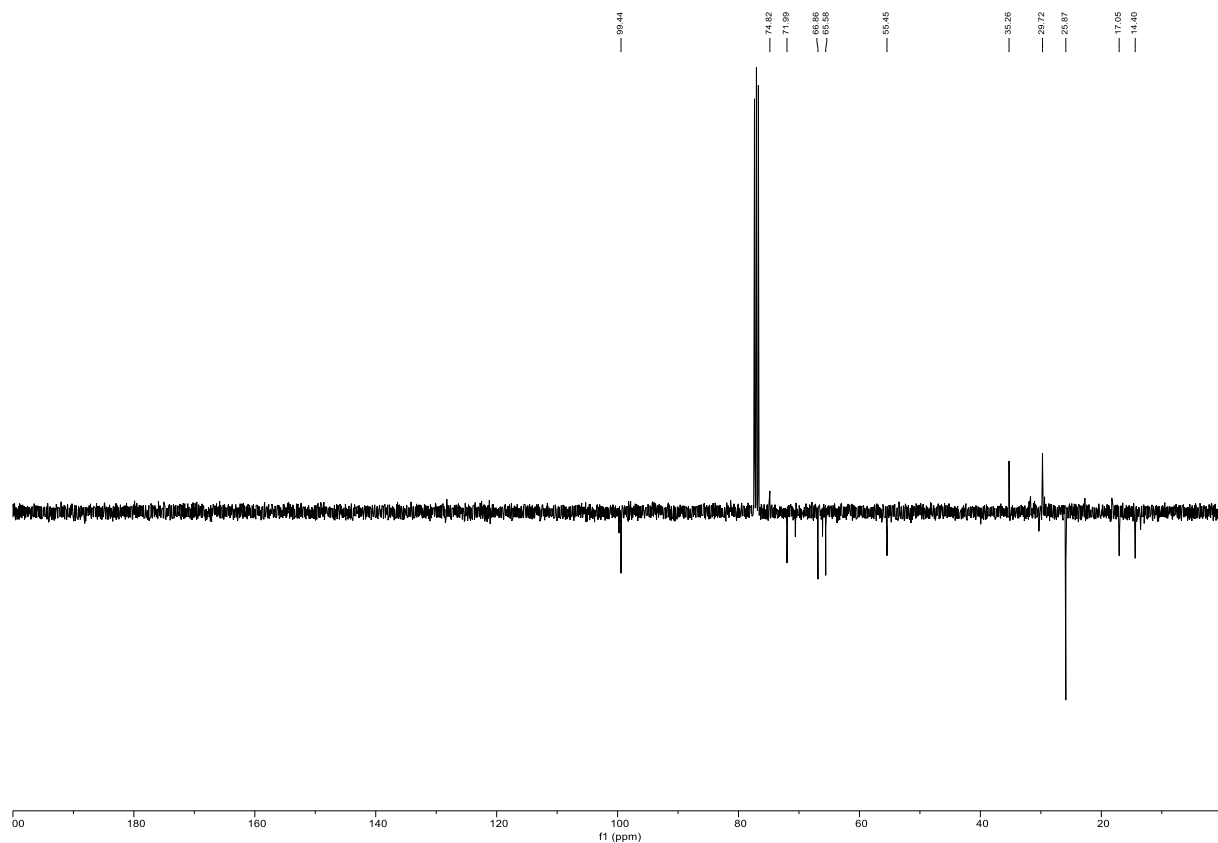

HH-COSY NMR,  $\text{CDCl}_3$  of **S21**

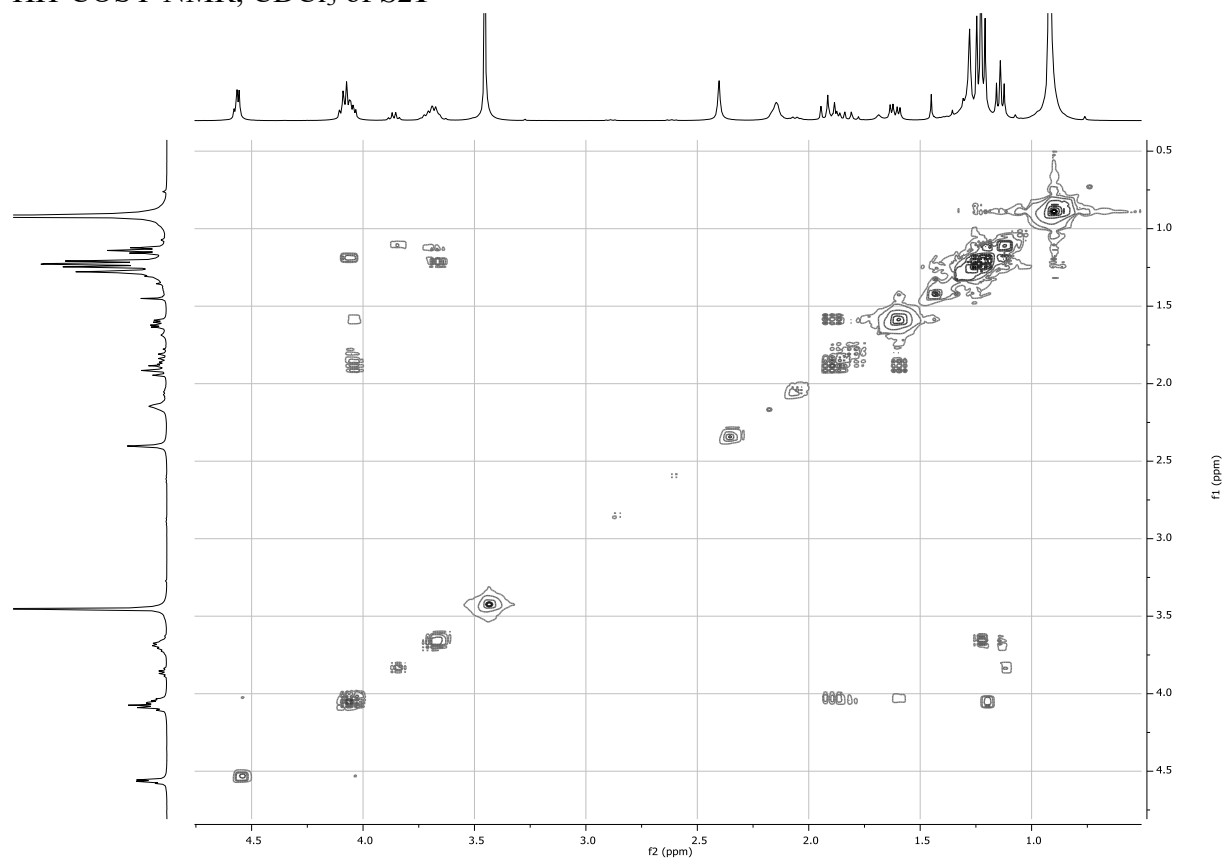



$^{13}\text{C}$  NMR, 101 MHz,  $\text{CDCl}_3$  of **S22**

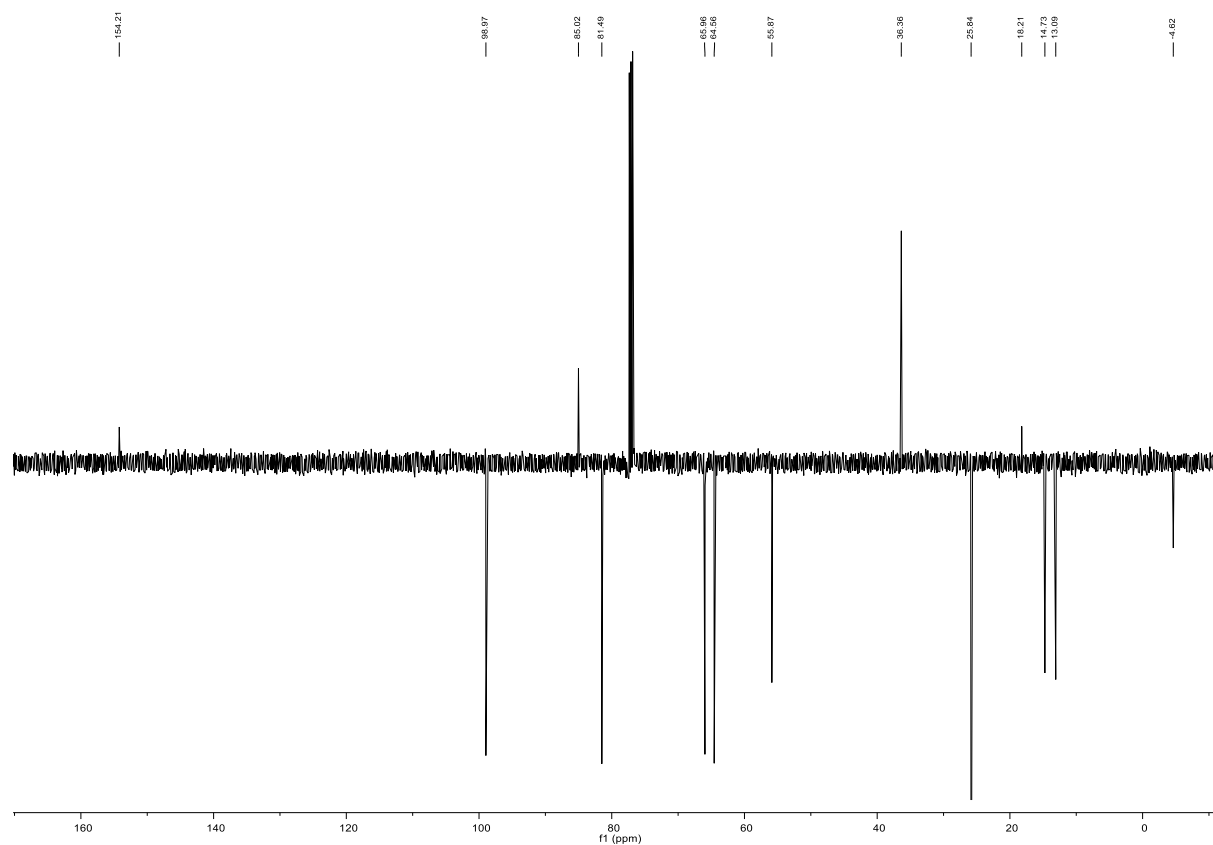

HH-COSY NMR,  $\text{CDCl}_3$  of **S22**

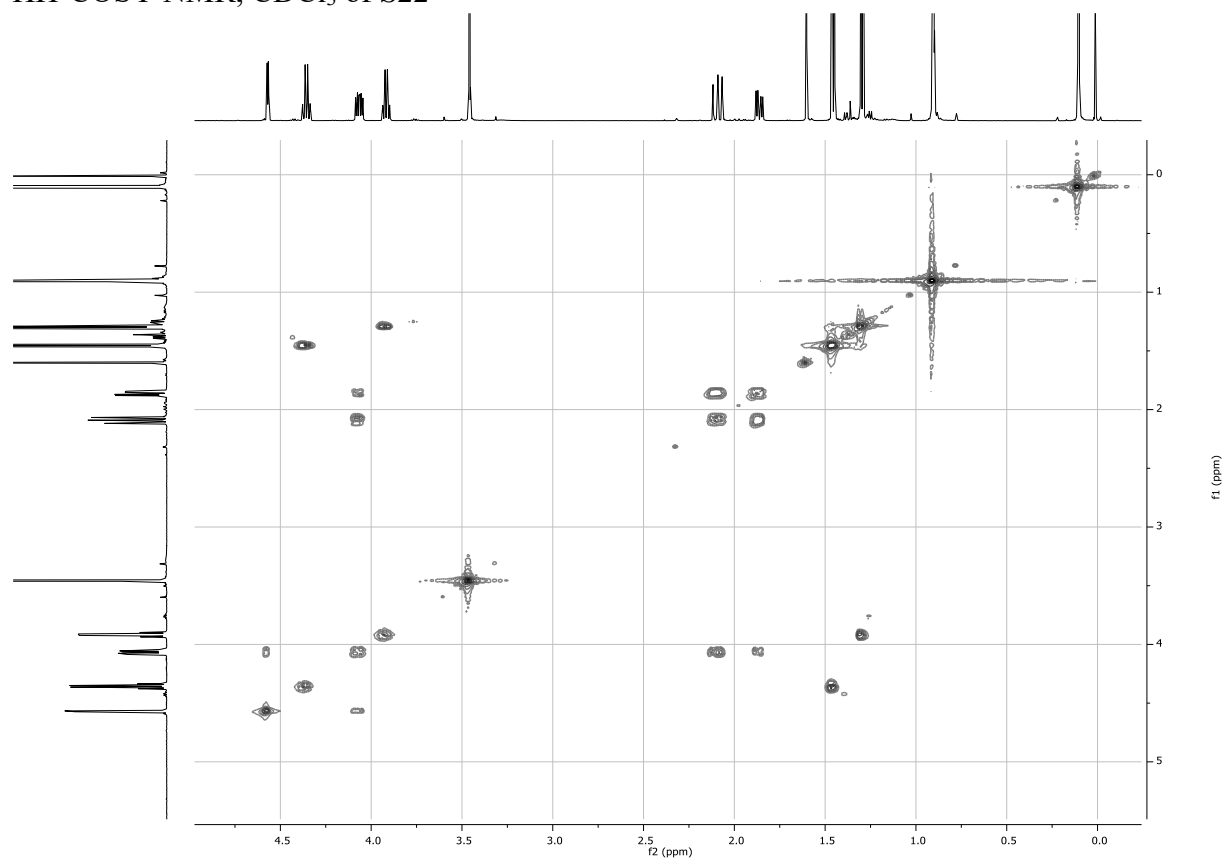

HSQC NMR, CDCl<sub>3</sub> of **S22**

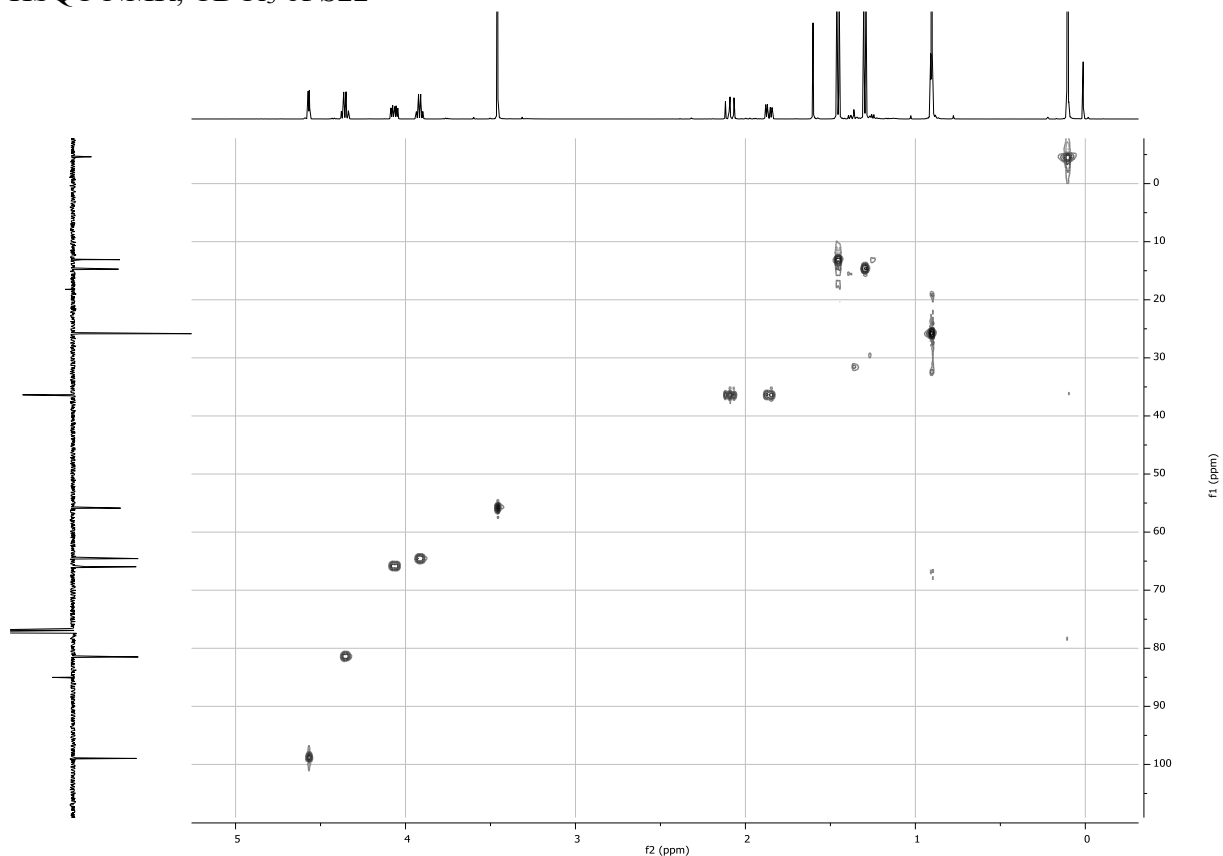

<sup>1</sup>H NMR, 400 MHz, CDCl<sub>3</sub> of **S23**

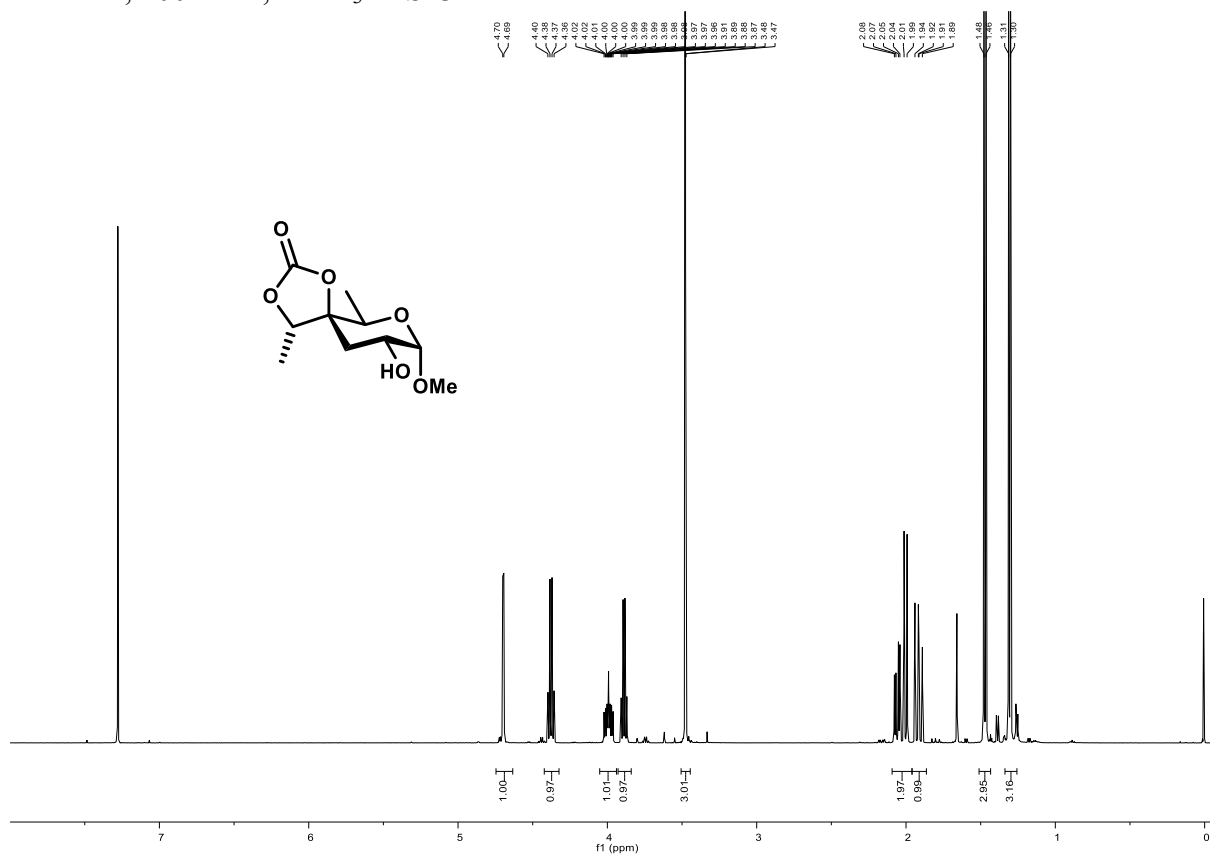

$^{13}\text{C}$  NMR, 101 MHz,  $\text{CDCl}_3$  of **S23**

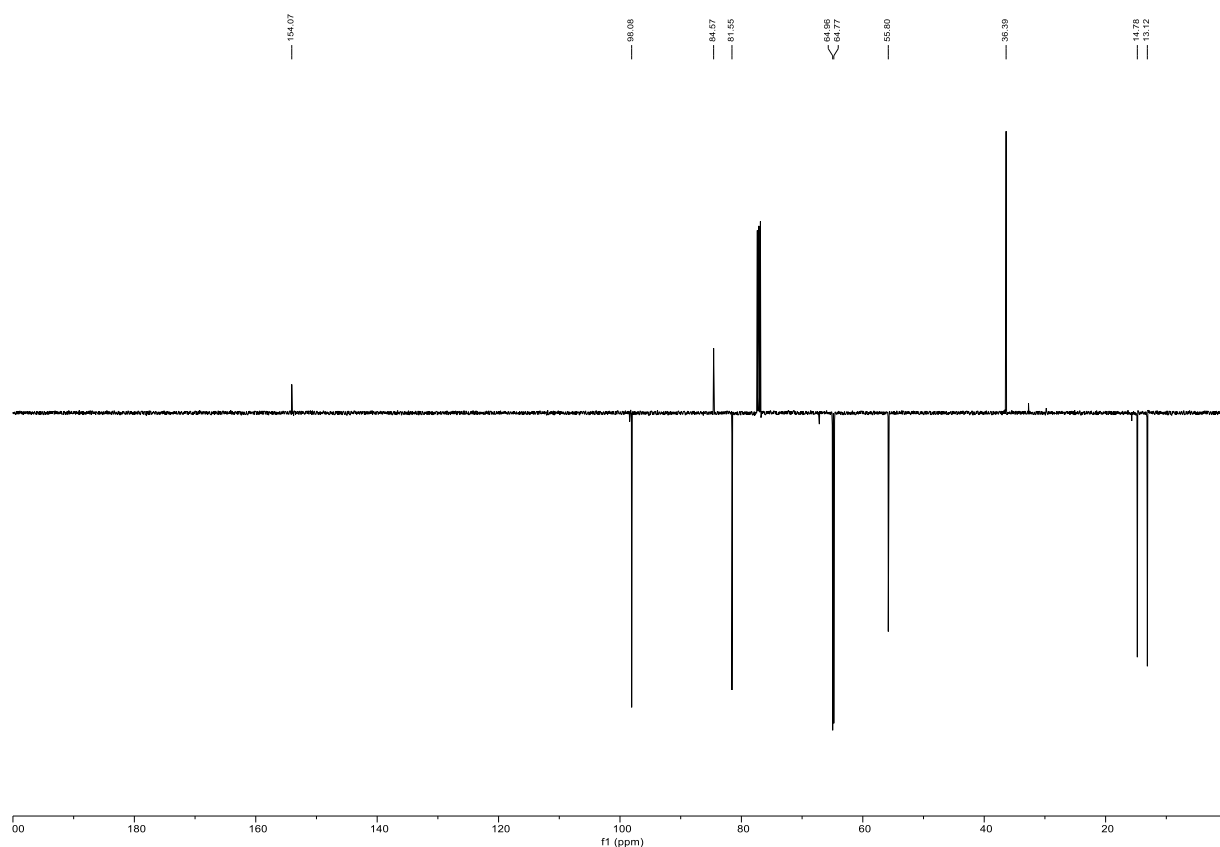

HH-COSY NMR,  $\text{CDCl}_3$  of **S23**

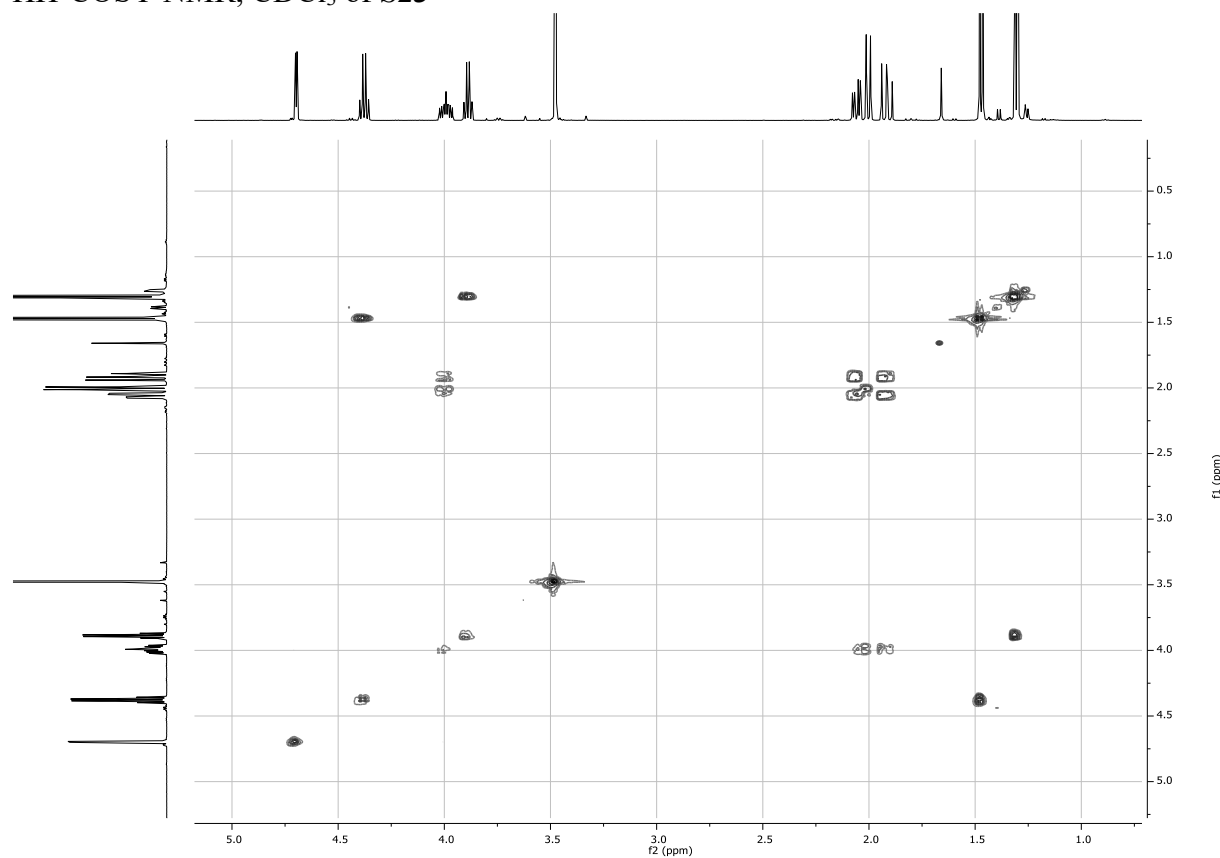

HSQC NMR, CDCl<sub>3</sub> of **S23**

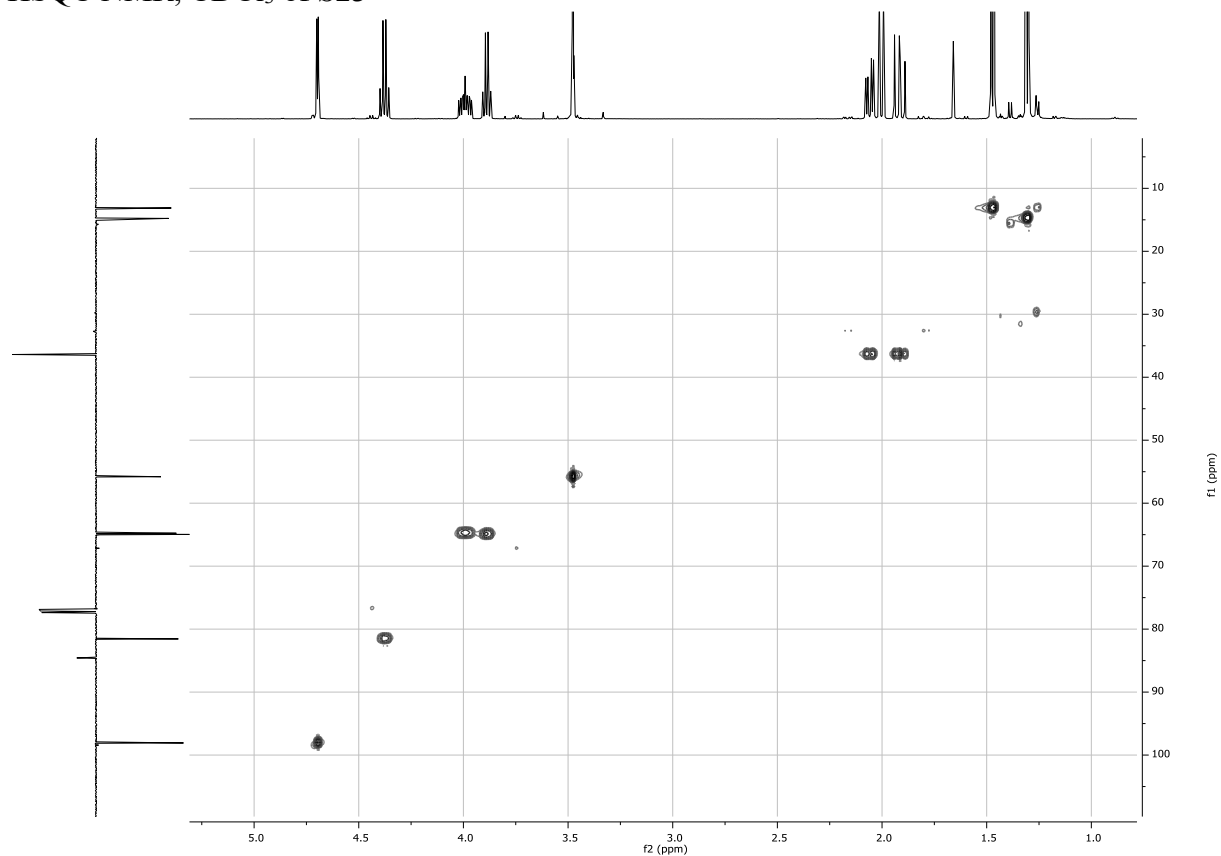

<sup>1</sup>H NMR, 400 MHz, CDCl<sub>3</sub> of **S24**

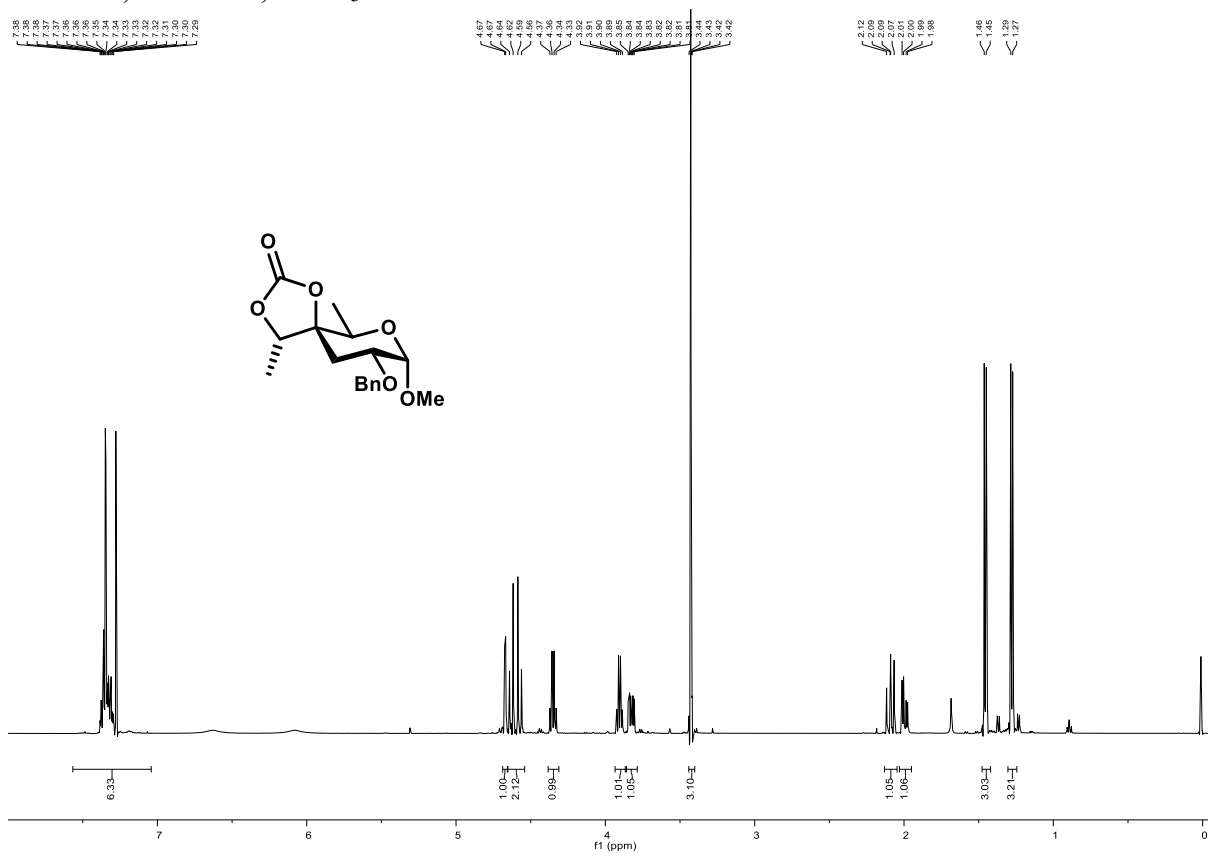

$^{13}\text{C}$  NMR, 101 MHz,  $\text{CDCl}_3$  of **S24**

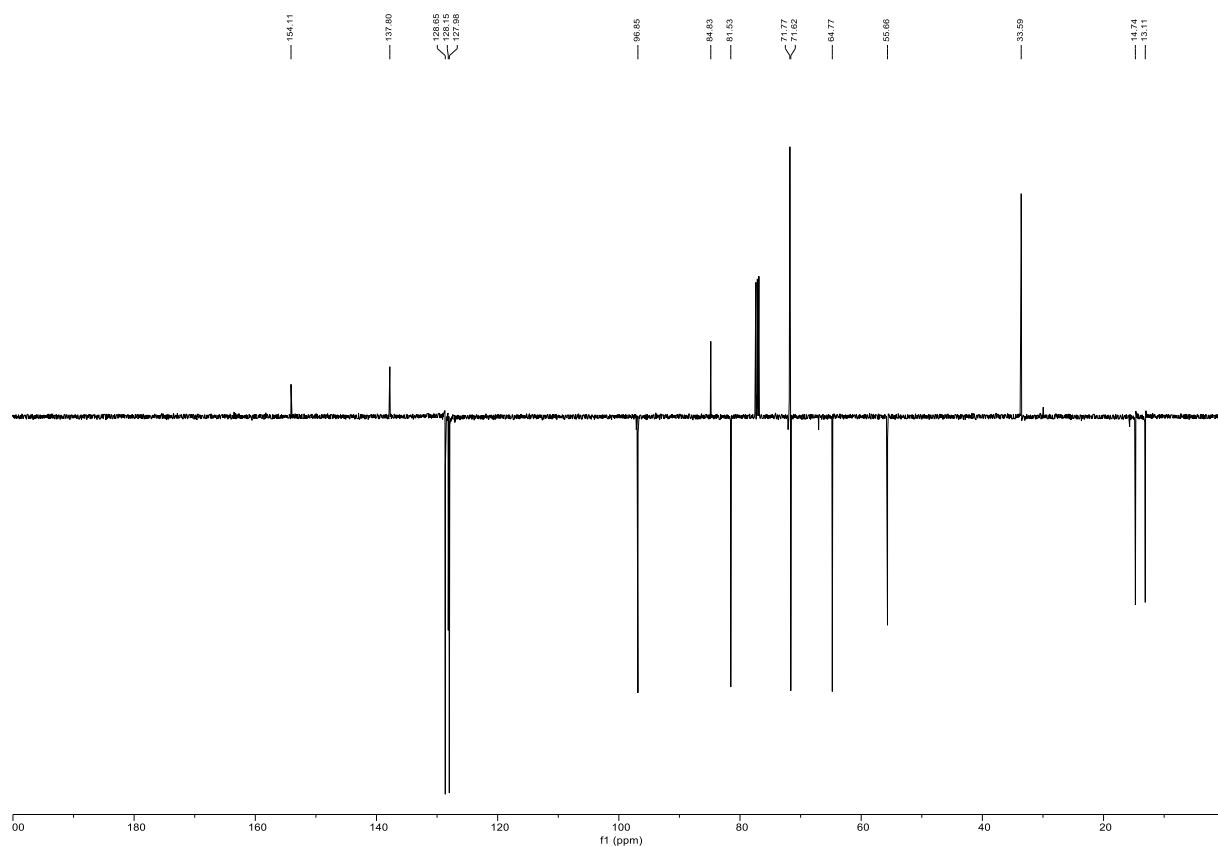

HH-COSY NMR,  $\text{CDCl}_3$  of **S24**

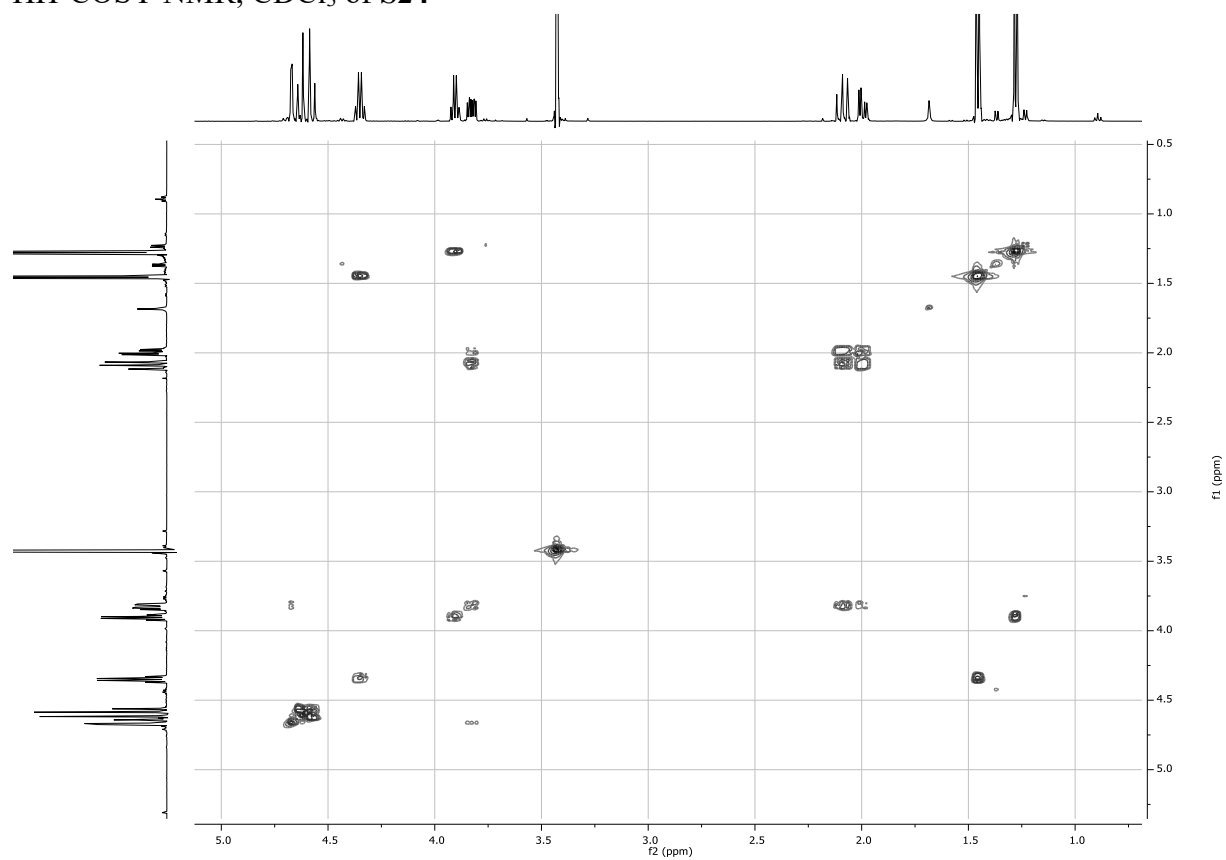



HSQC NMR, CDCl<sub>3</sub> of S24

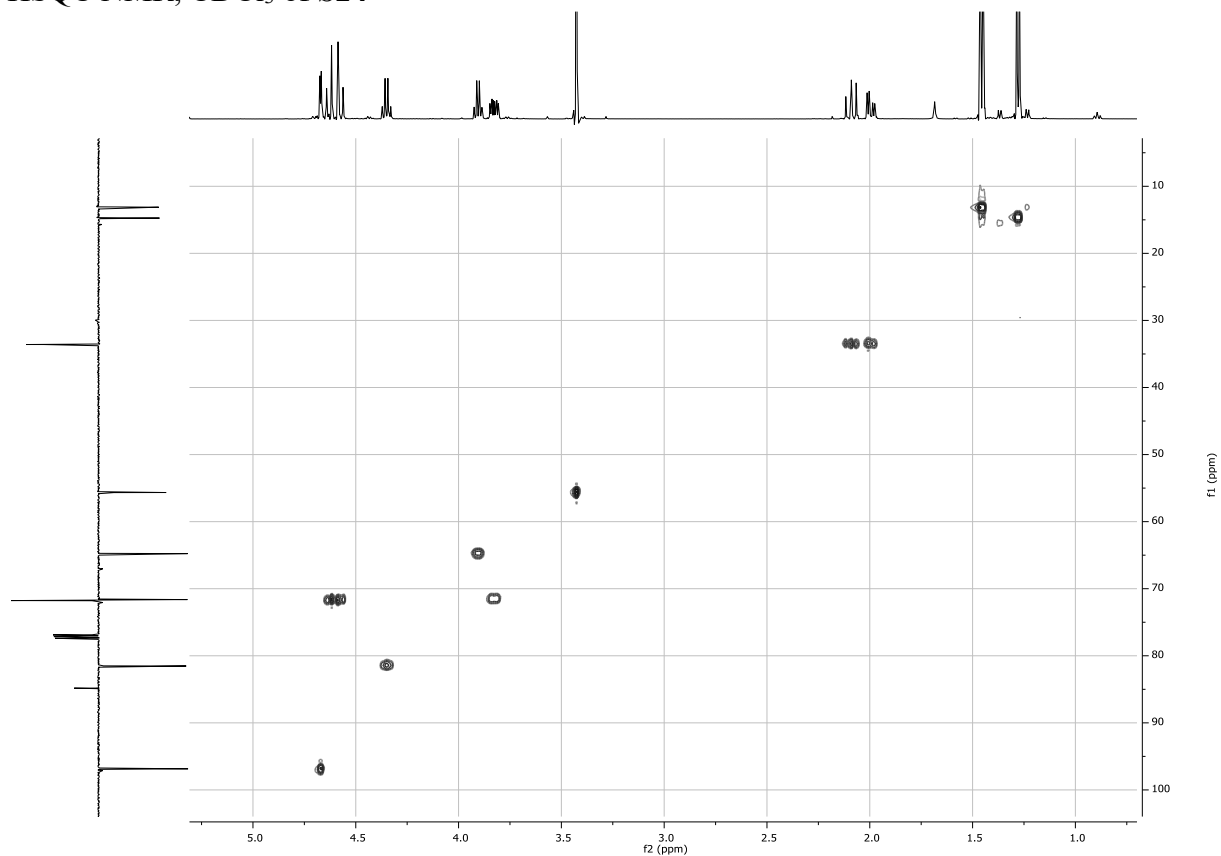

<sup>1</sup>H NMR, 400 MHz, CDCl<sub>3</sub> of S25

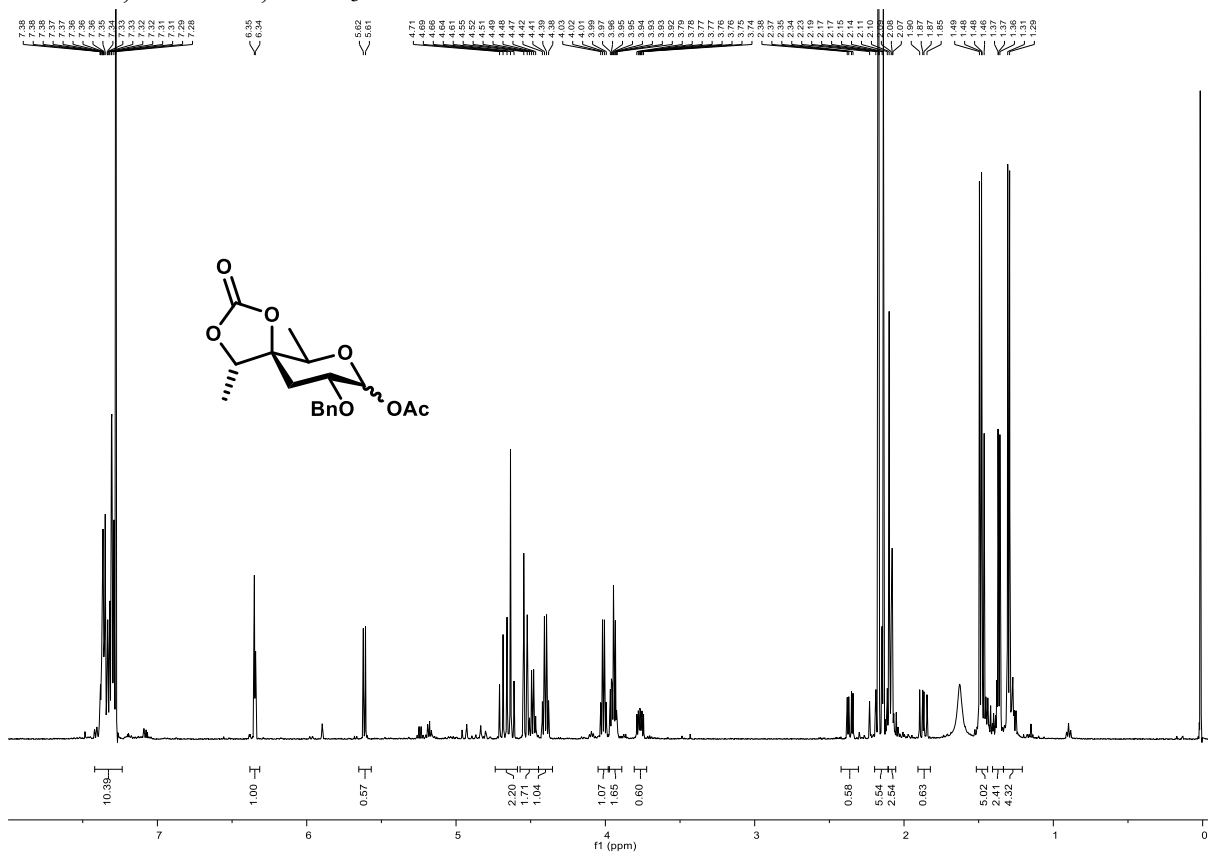

$^{13}\text{C}$  NMR, 101 MHz,  $\text{CDCl}_3$  of **S25**

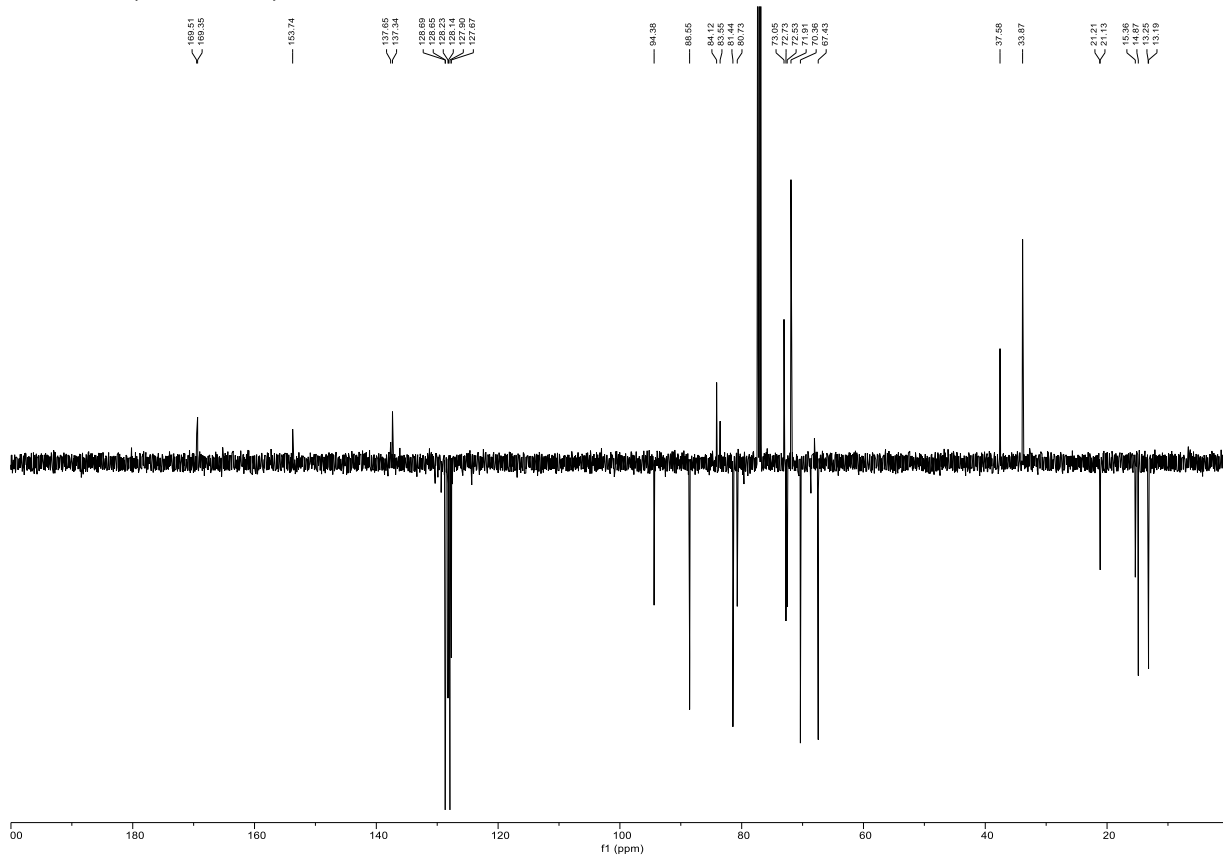

HH-COSY NMR,  $\text{CDCl}_3$  of **S25**

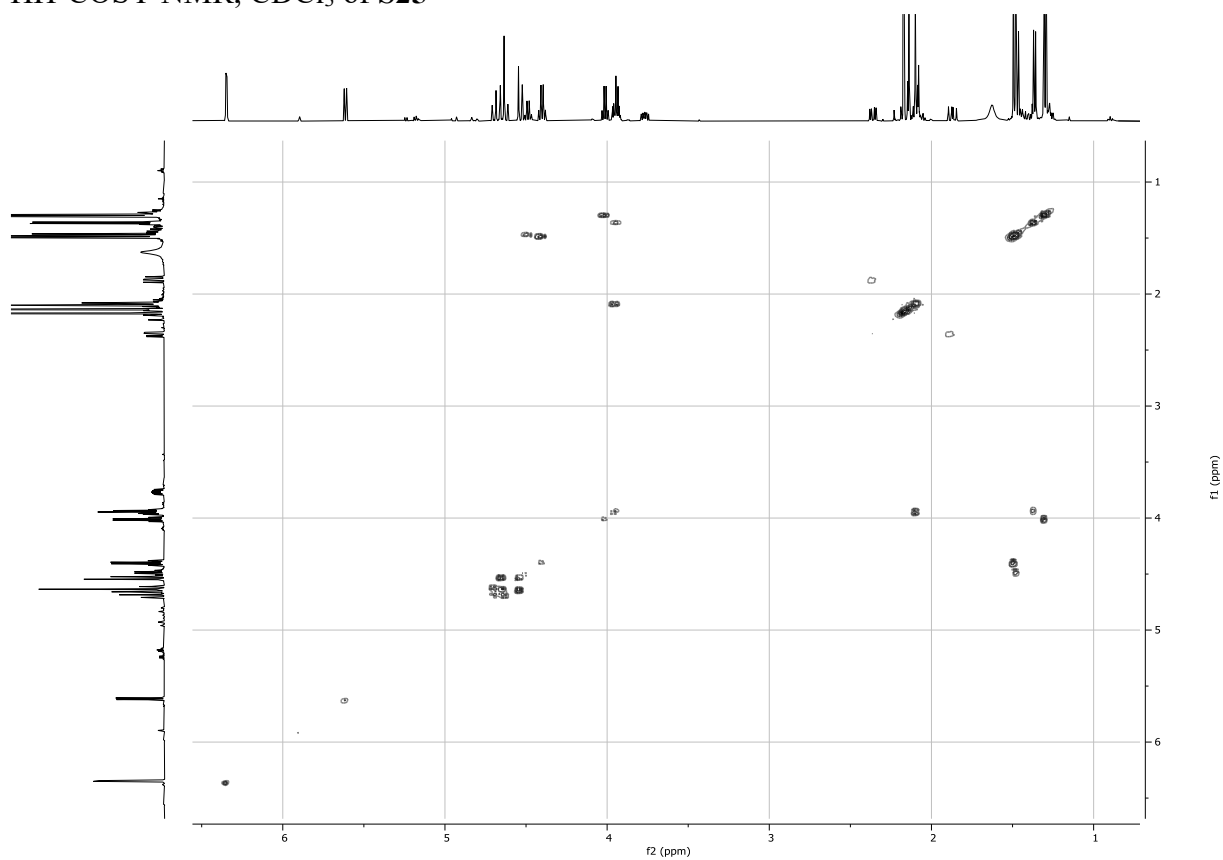

HSQC NMR, CDCl<sub>3</sub> of **S25**

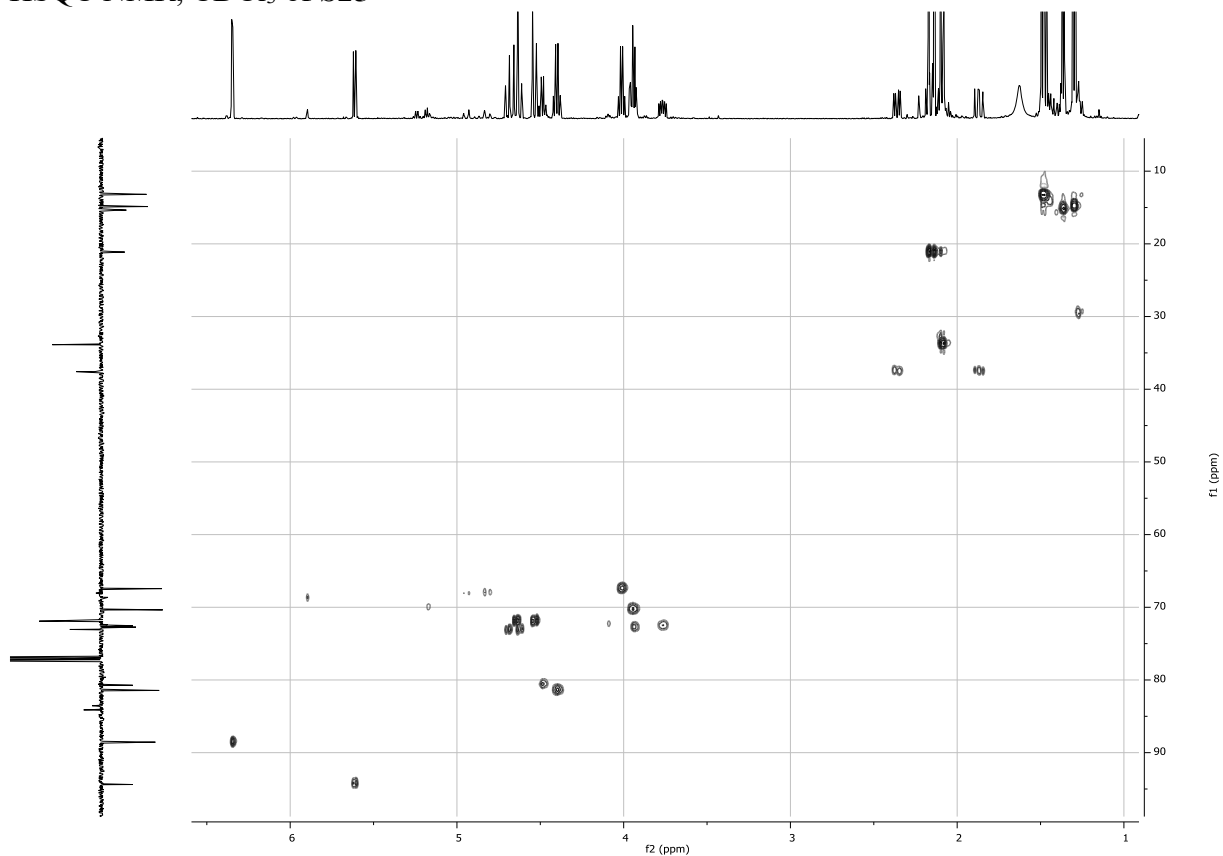

<sup>1</sup>H NMR, 400 MHz, CDCl<sub>3</sub> of **23**

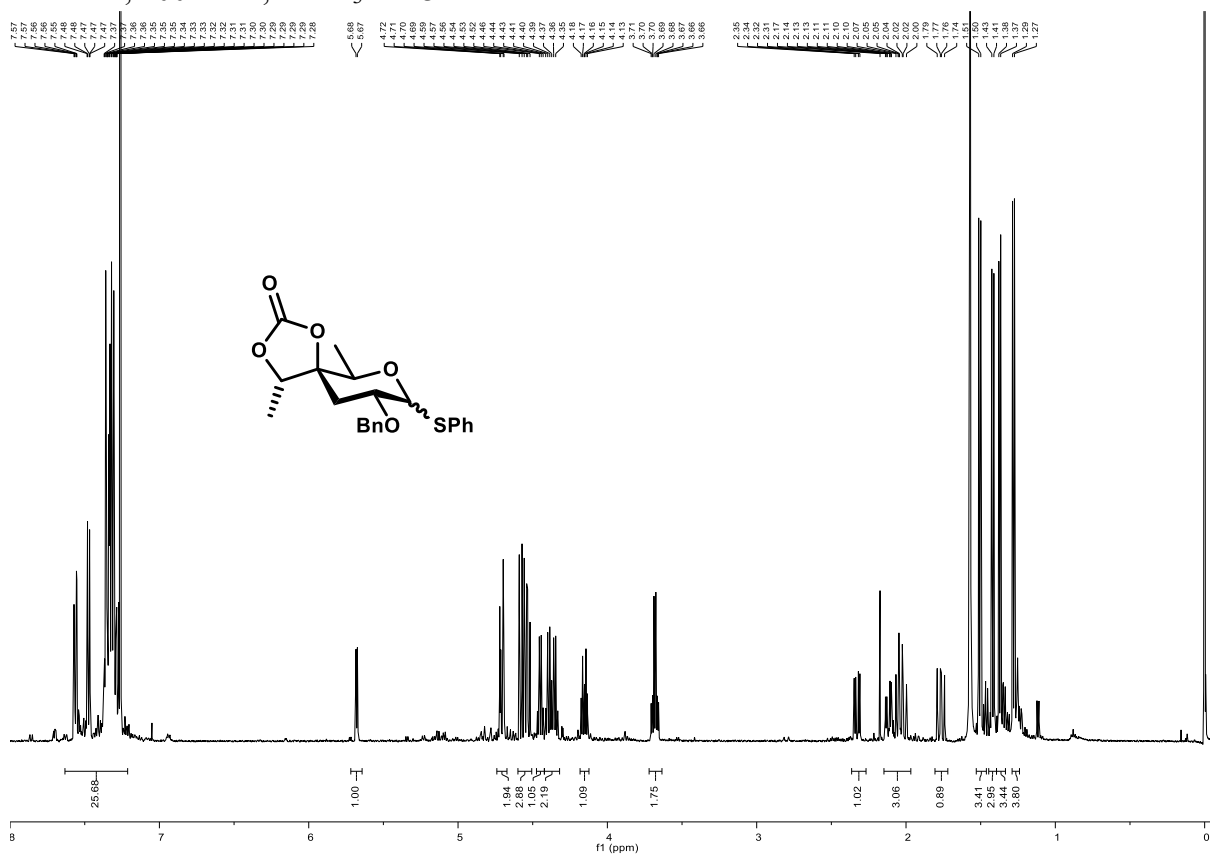

$^{13}\text{C}$  NMR, 101 MHz,  $\text{CDCl}_3$  of **23**

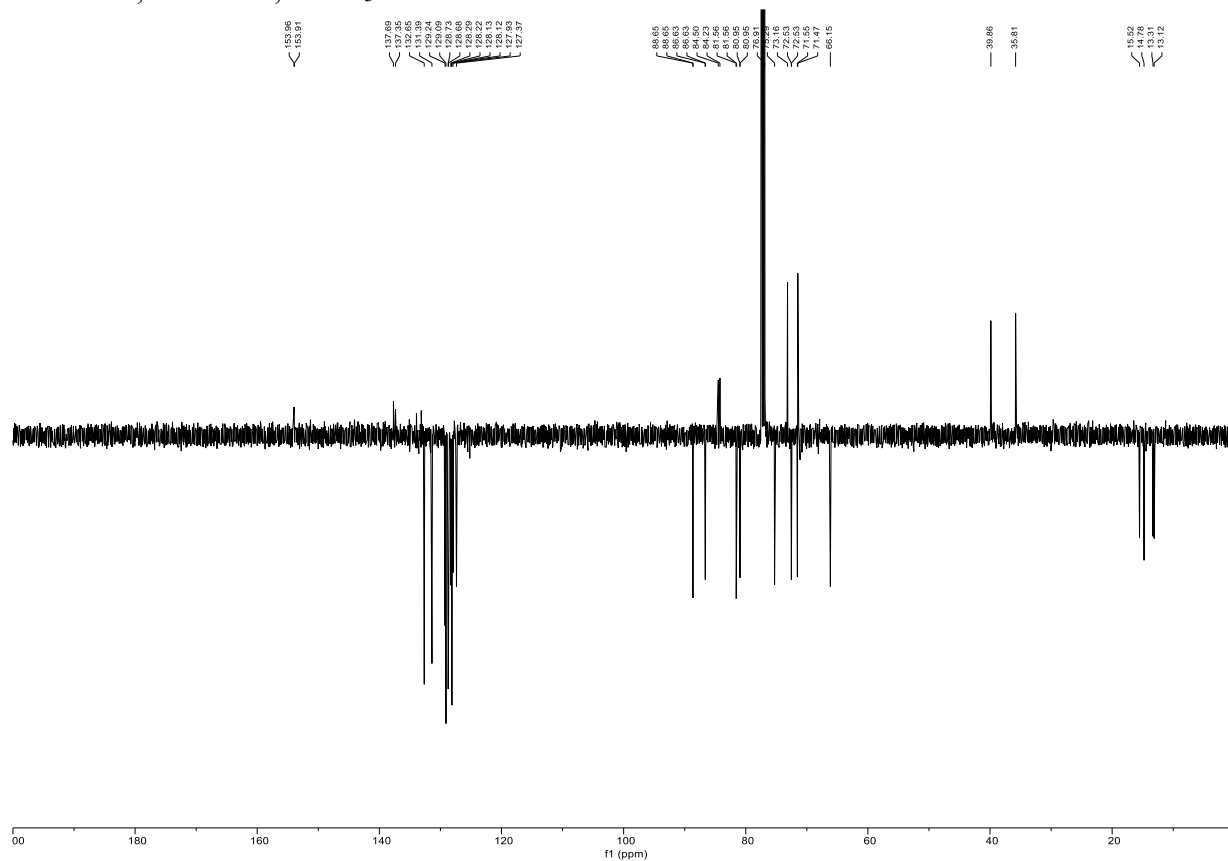

HH-COSY NMR,  $\text{CDCl}_3$  of **23**

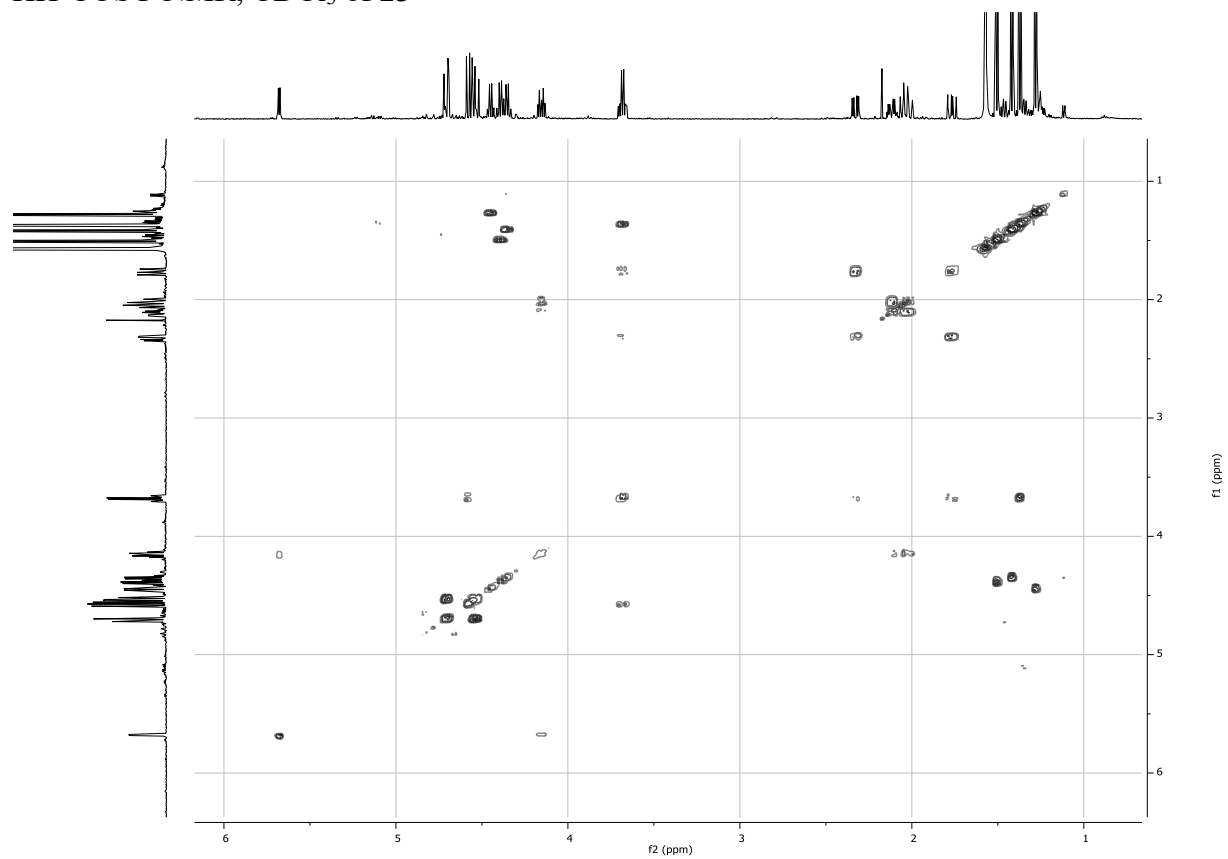



$^{13}\text{C}$  NMR, 101 MHz,  $\text{CDCl}_3$  of **S26**

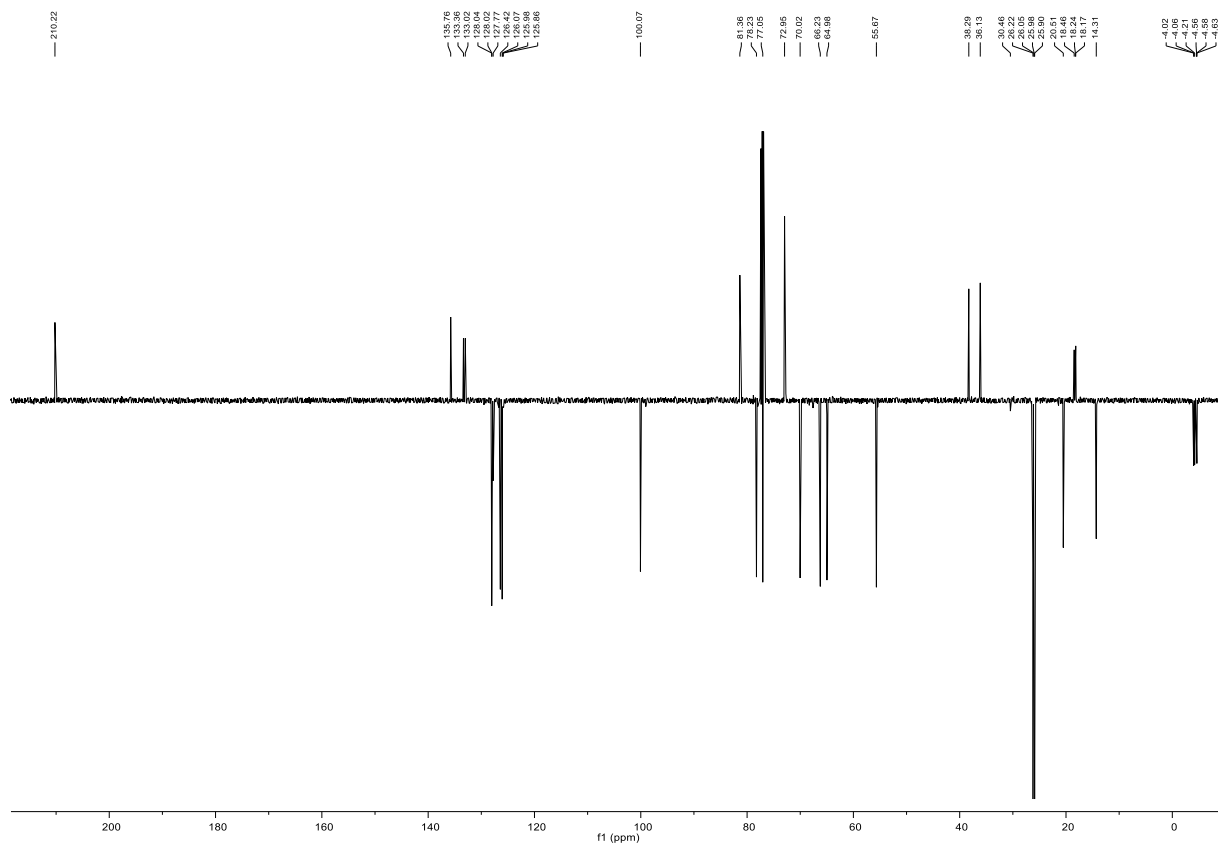

HH-COSY NMR,  $\text{CDCl}_3$  of **S26**

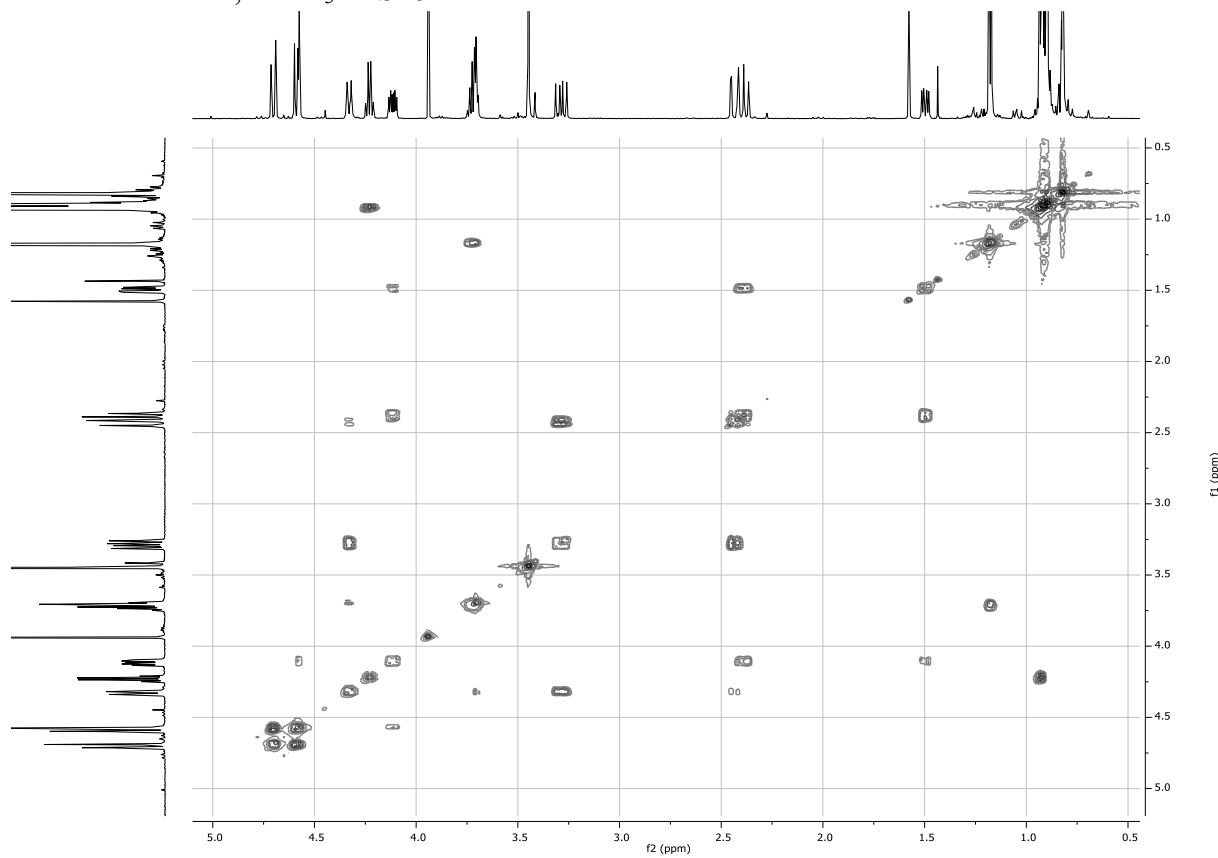

HSQC NMR, CDCl<sub>3</sub> of S26

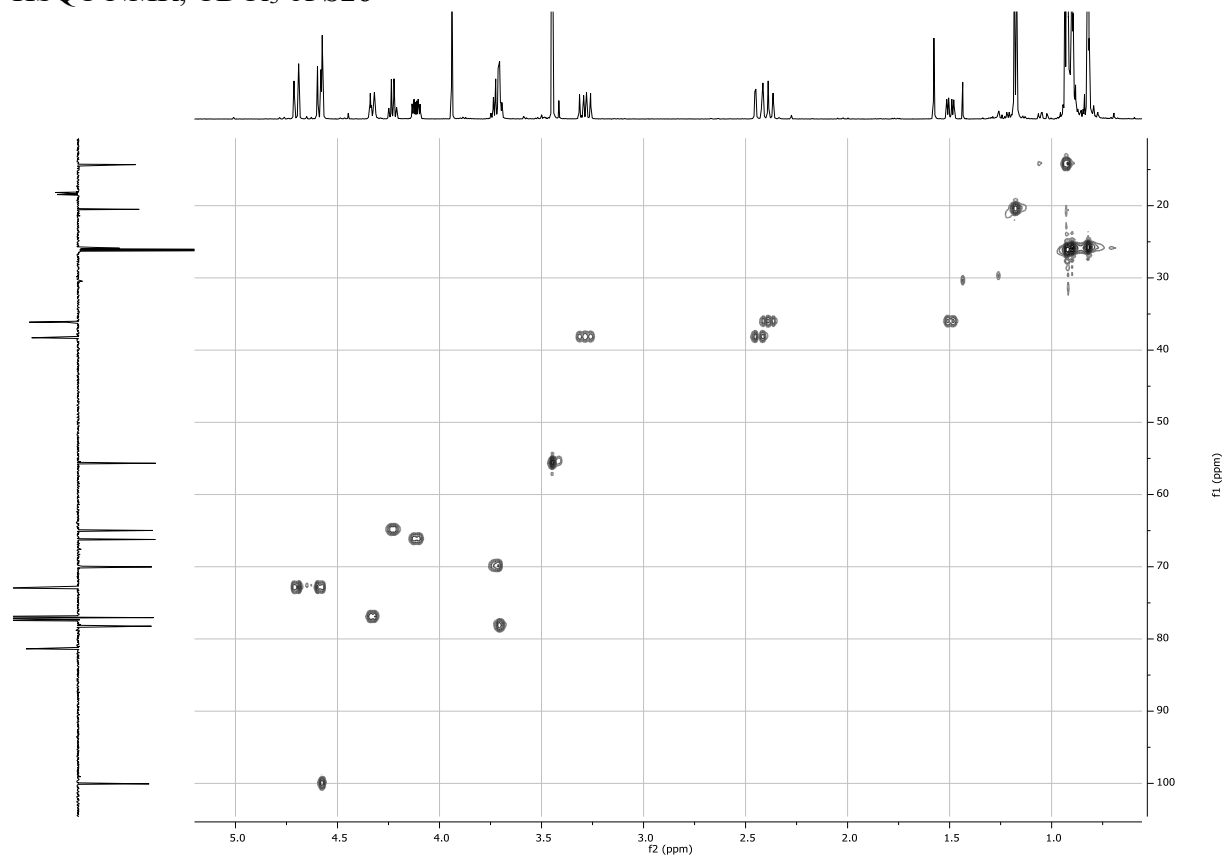

NOESY NMR, CDCl<sub>3</sub> of S26

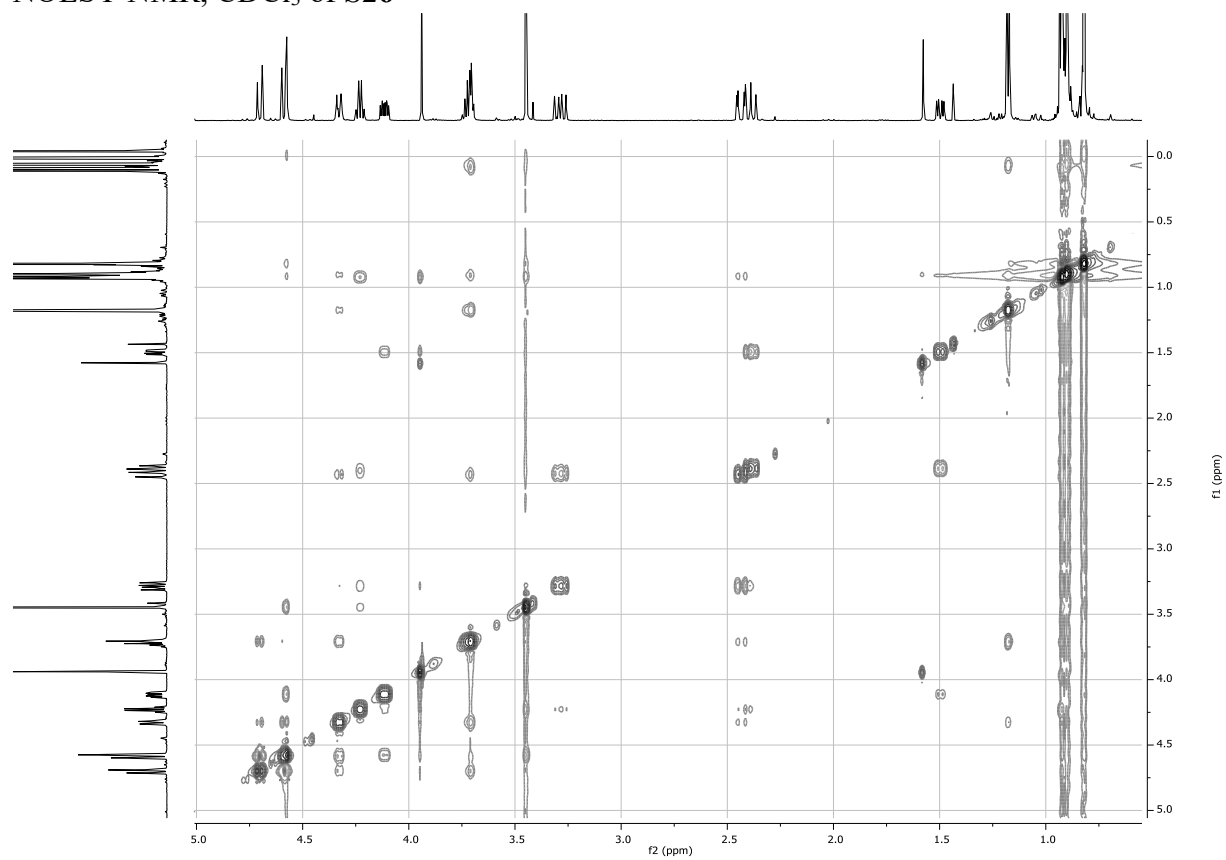

<sup>1</sup>H NMR, 400 MHz, CDCl<sub>3</sub> of **S26-C4-*epi***

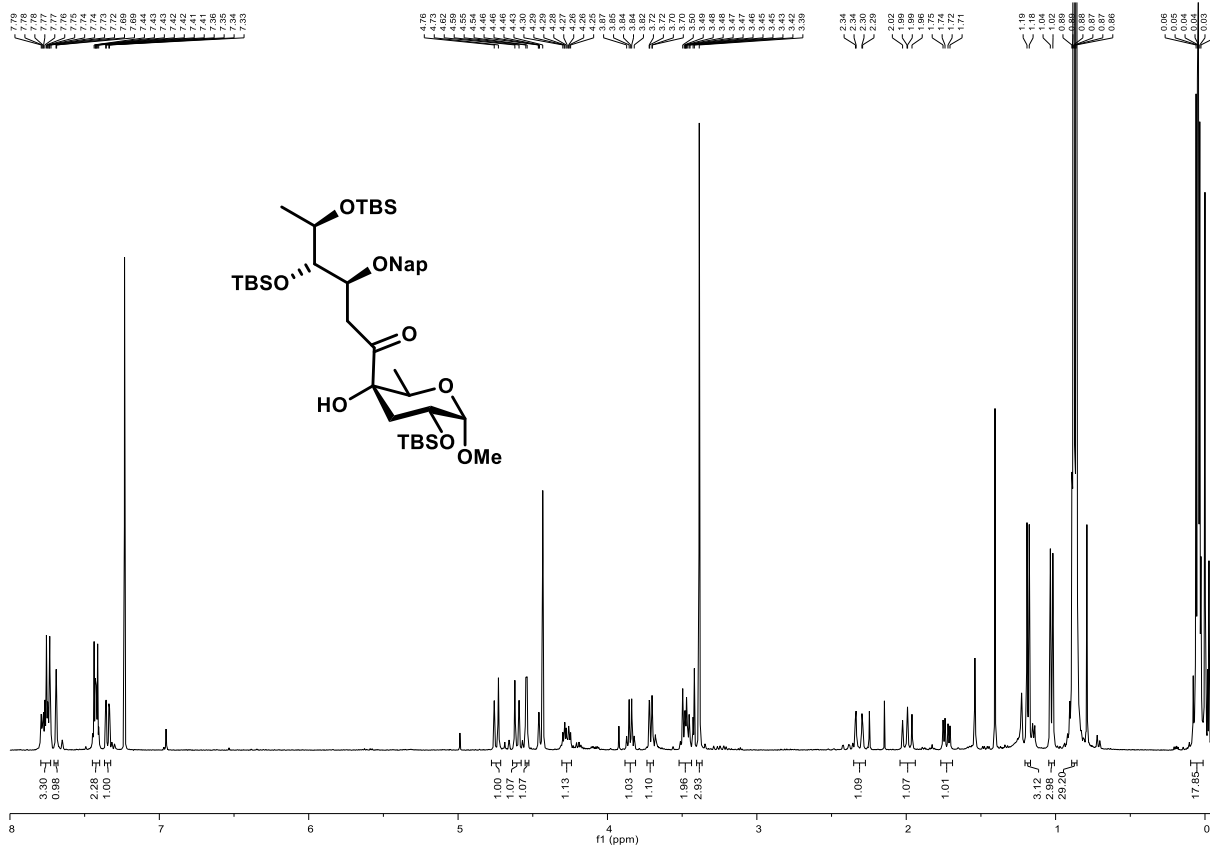

<sup>13</sup>C NMR, 101 MHz, CDCl<sub>3</sub> of **S26-C4-*epi***

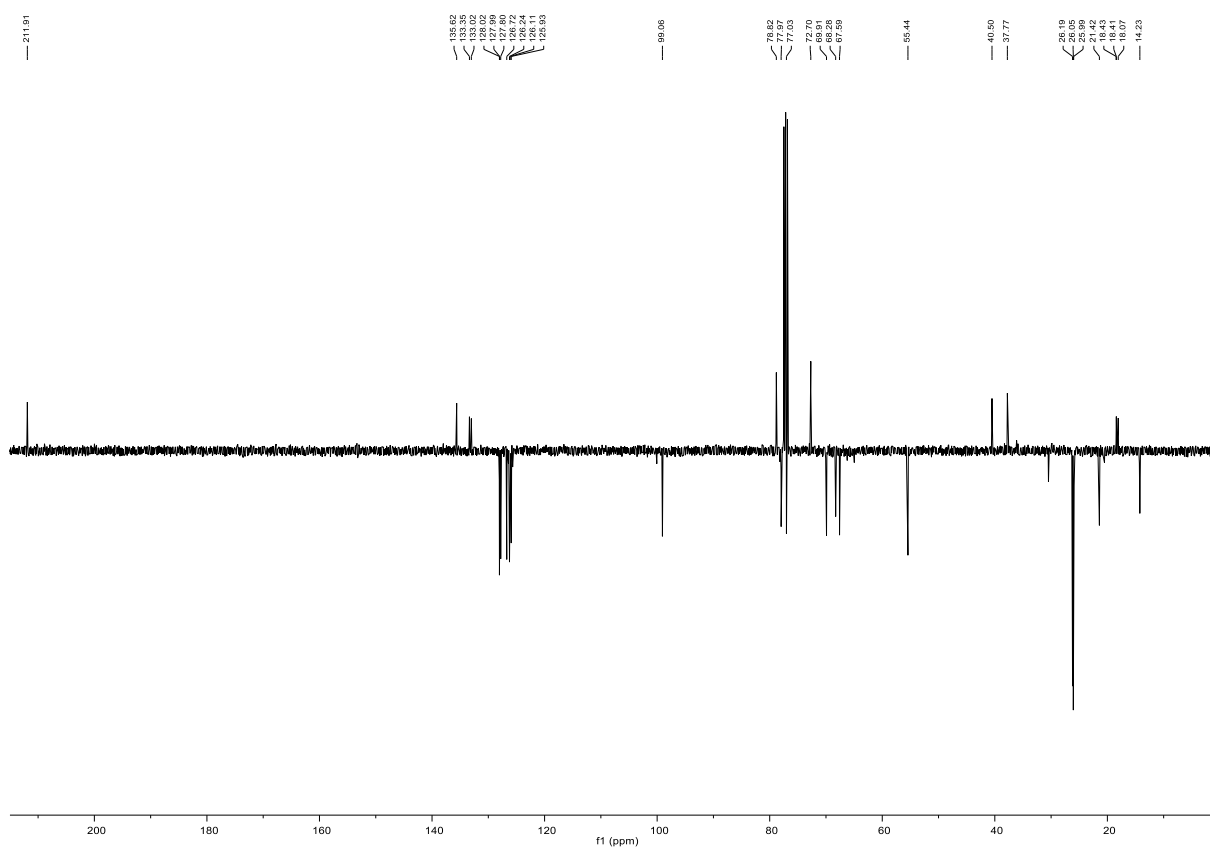



HH-COSY NMR, CDCl<sub>3</sub> of **S26-C4-*epi***

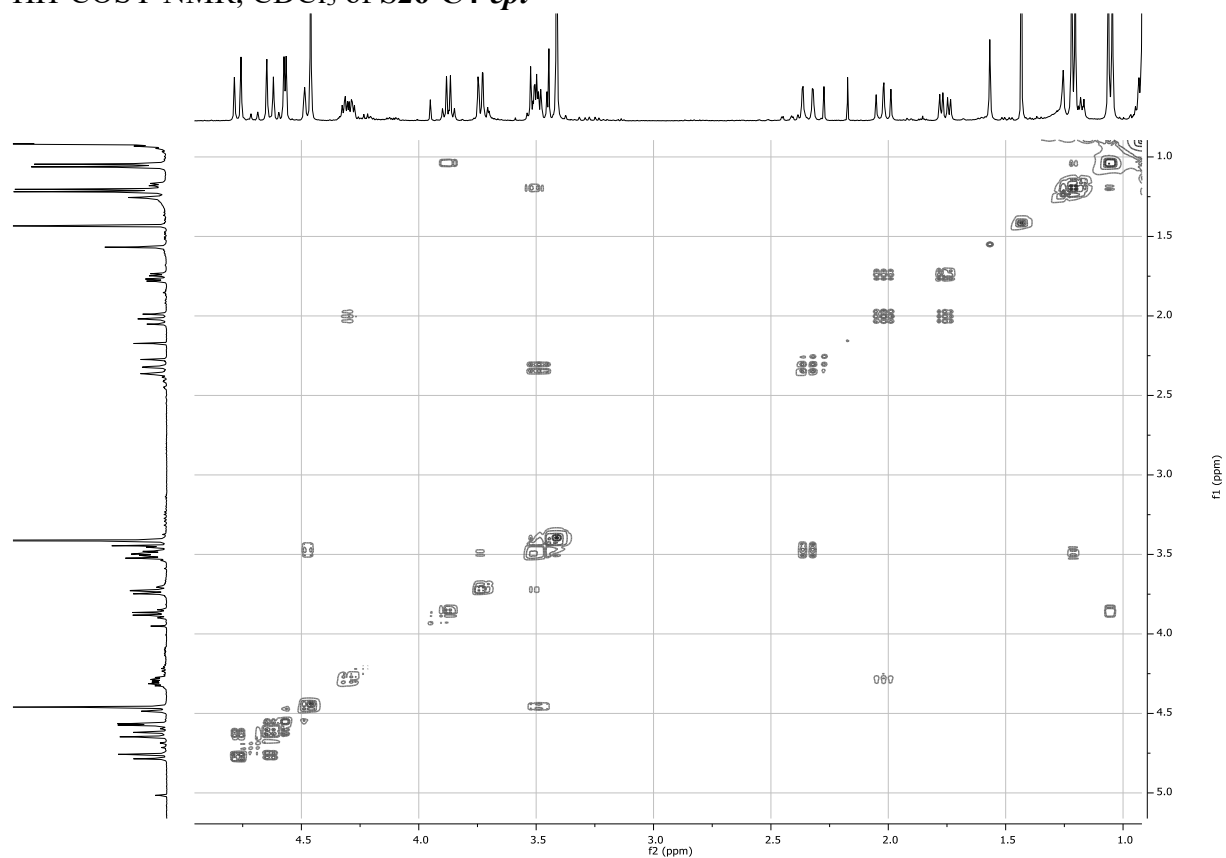

HSQC NMR, CDCl<sub>3</sub> of **S26-C4-*epi***

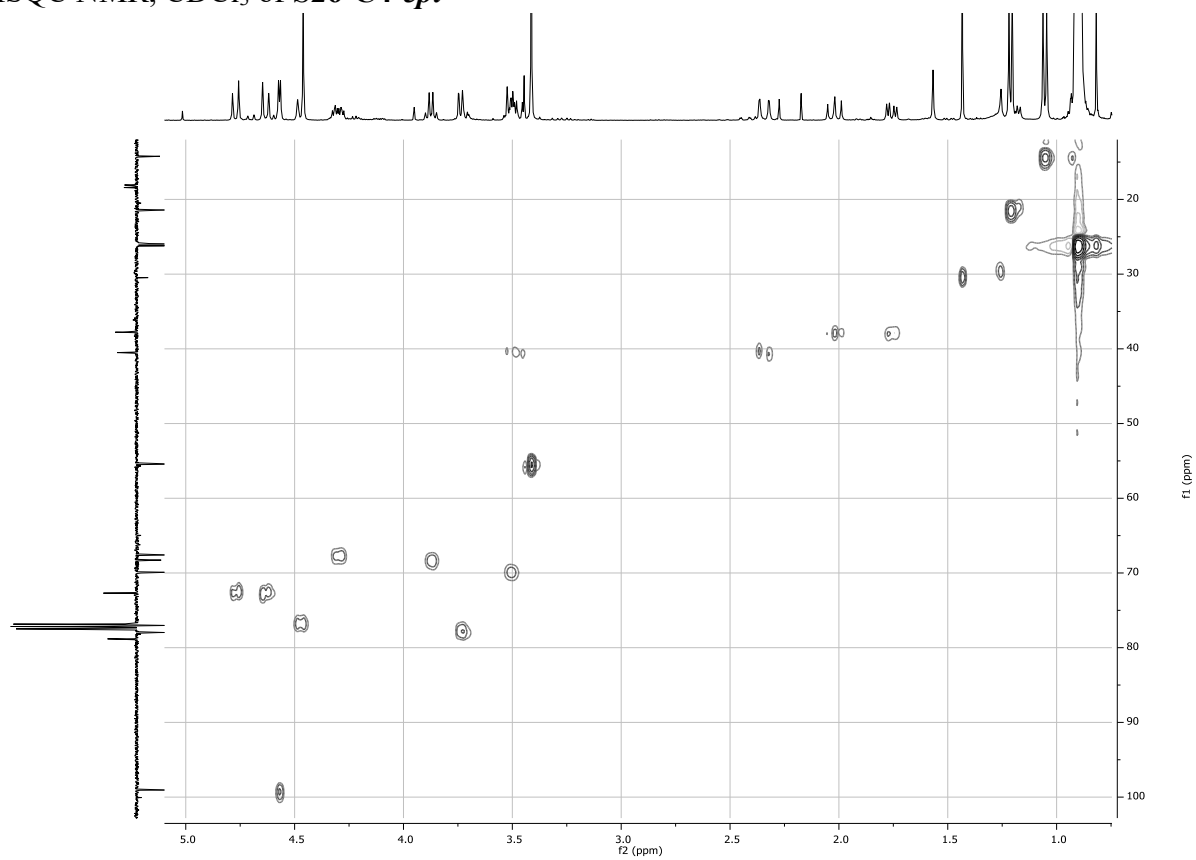



$^{13}\text{C}$  NMR, 101 MHz,  $\text{CDCl}_3$  of **S27**

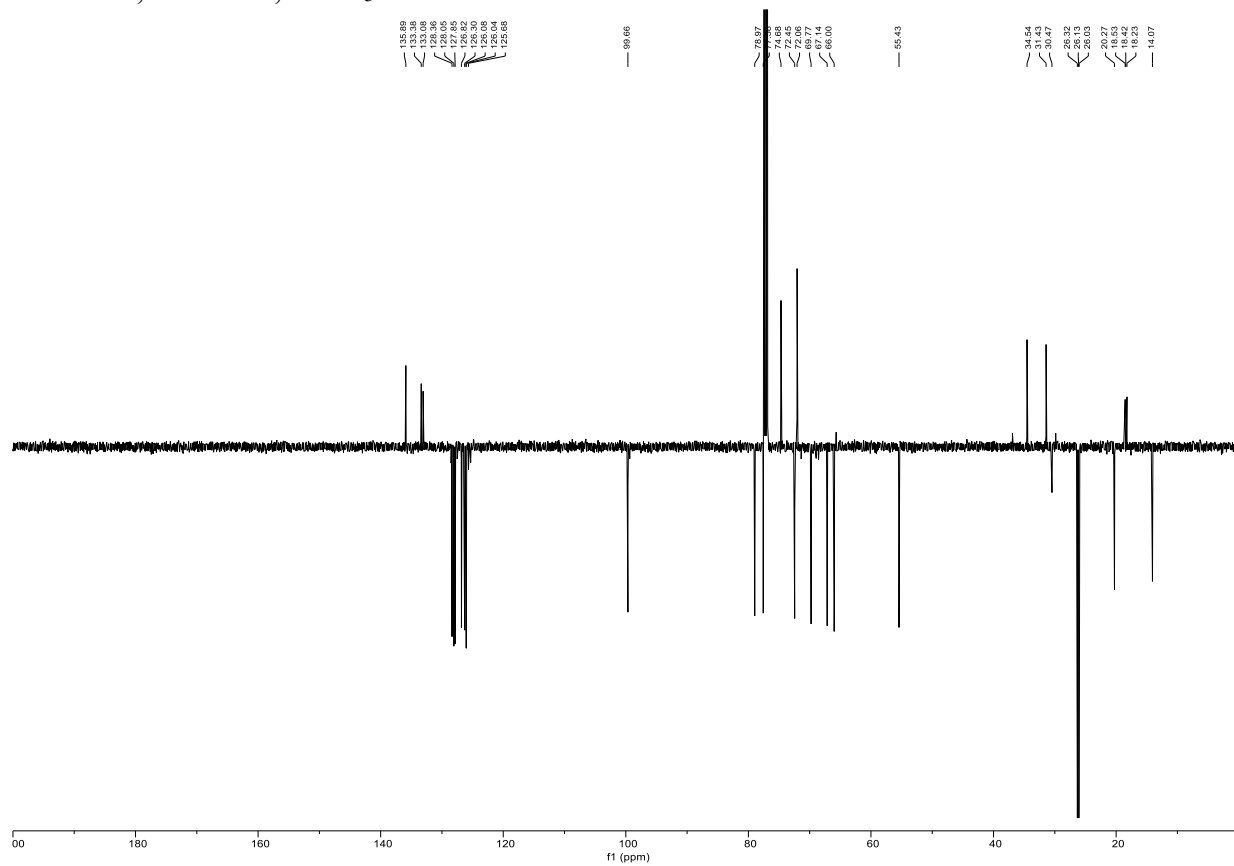

HH-COSY NMR,  $\text{CDCl}_3$  of **S27**

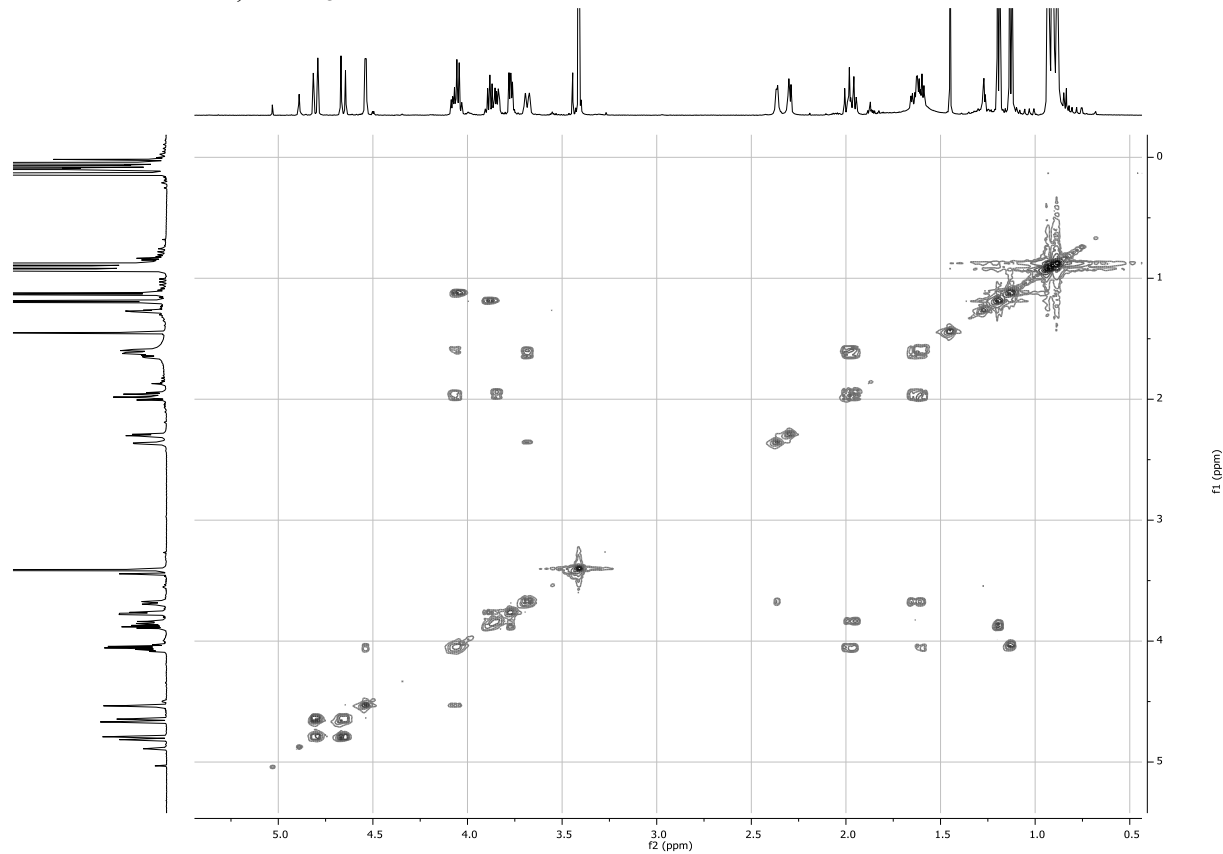

HSQC NMR, CDCl<sub>3</sub> of **S27**

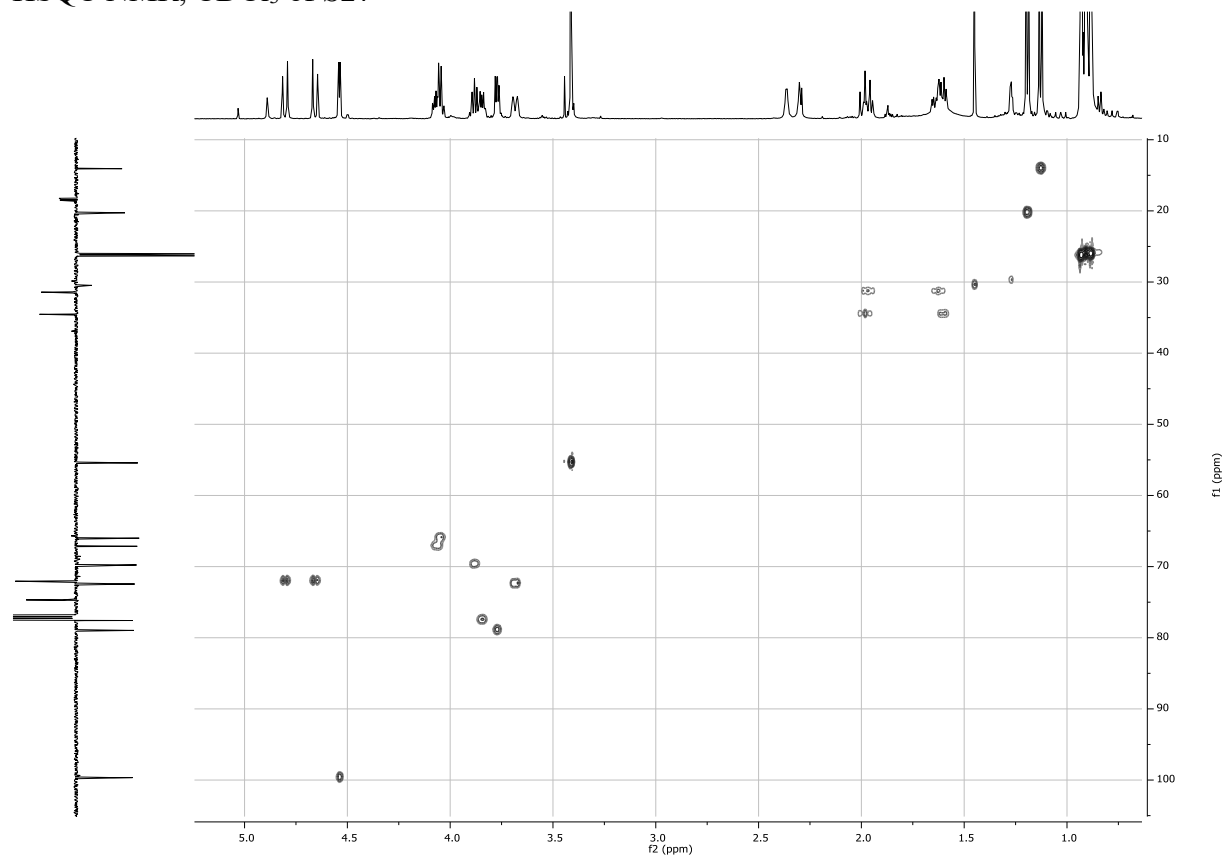

NOESY NMR, CDCl<sub>3</sub> of **S27**

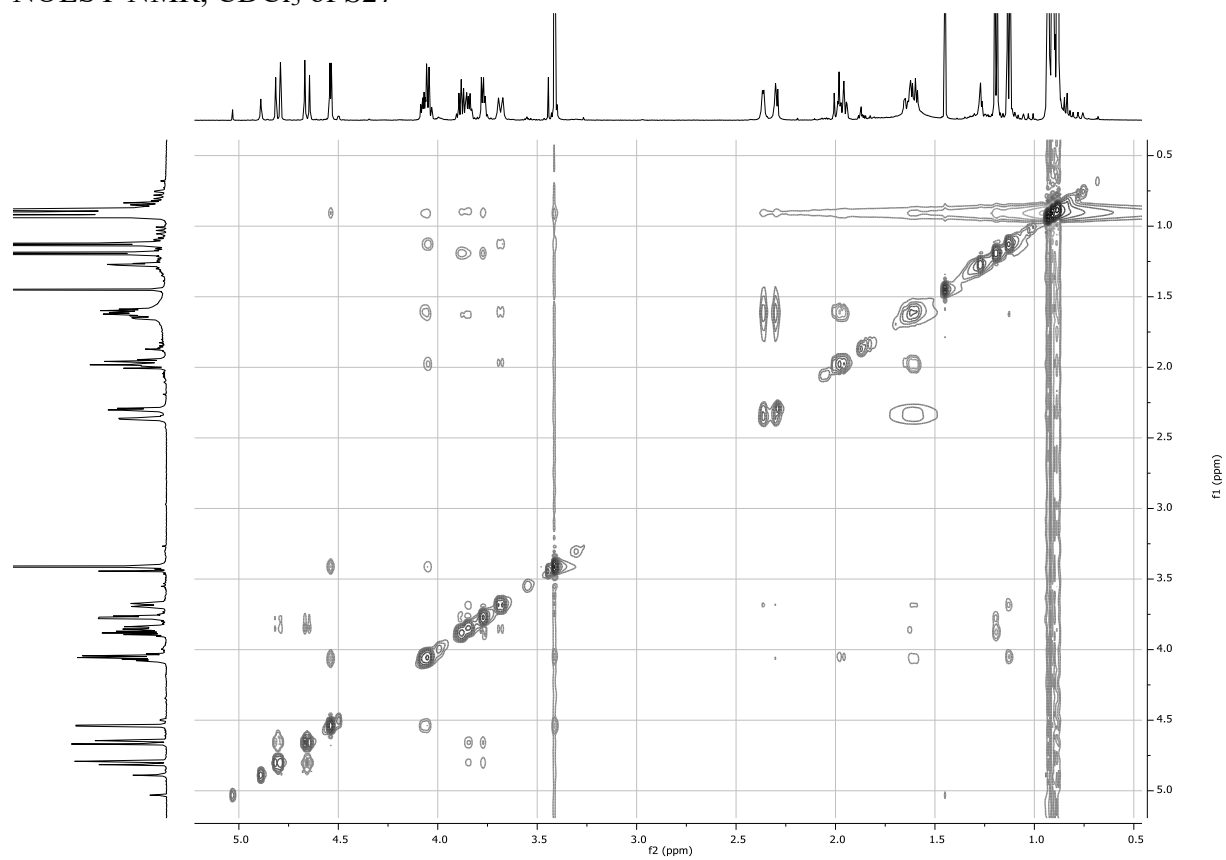

<sup>1</sup>H NMR, 400 MHz, CDCl<sub>3</sub> of **S29**

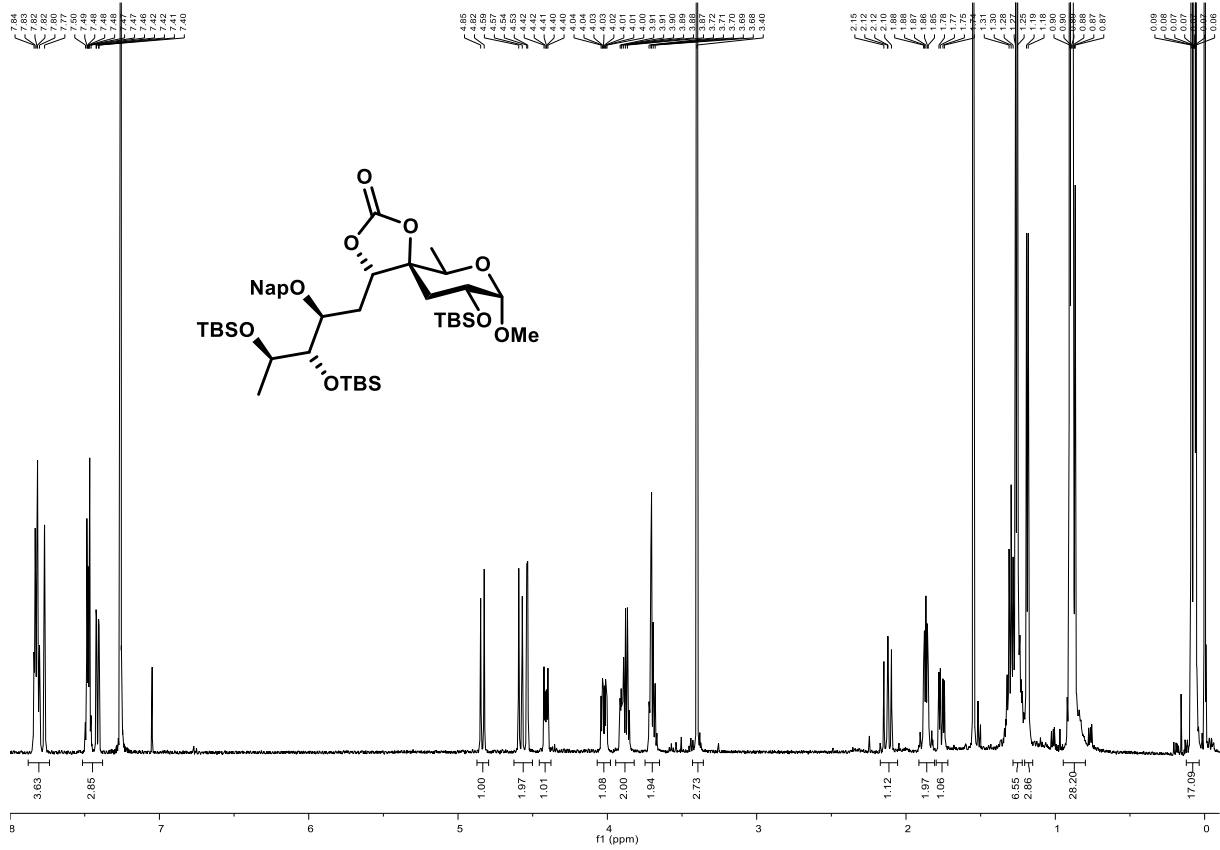

<sup>13</sup>C NMR, 101 MHz, CDCl<sub>3</sub> of **S29**

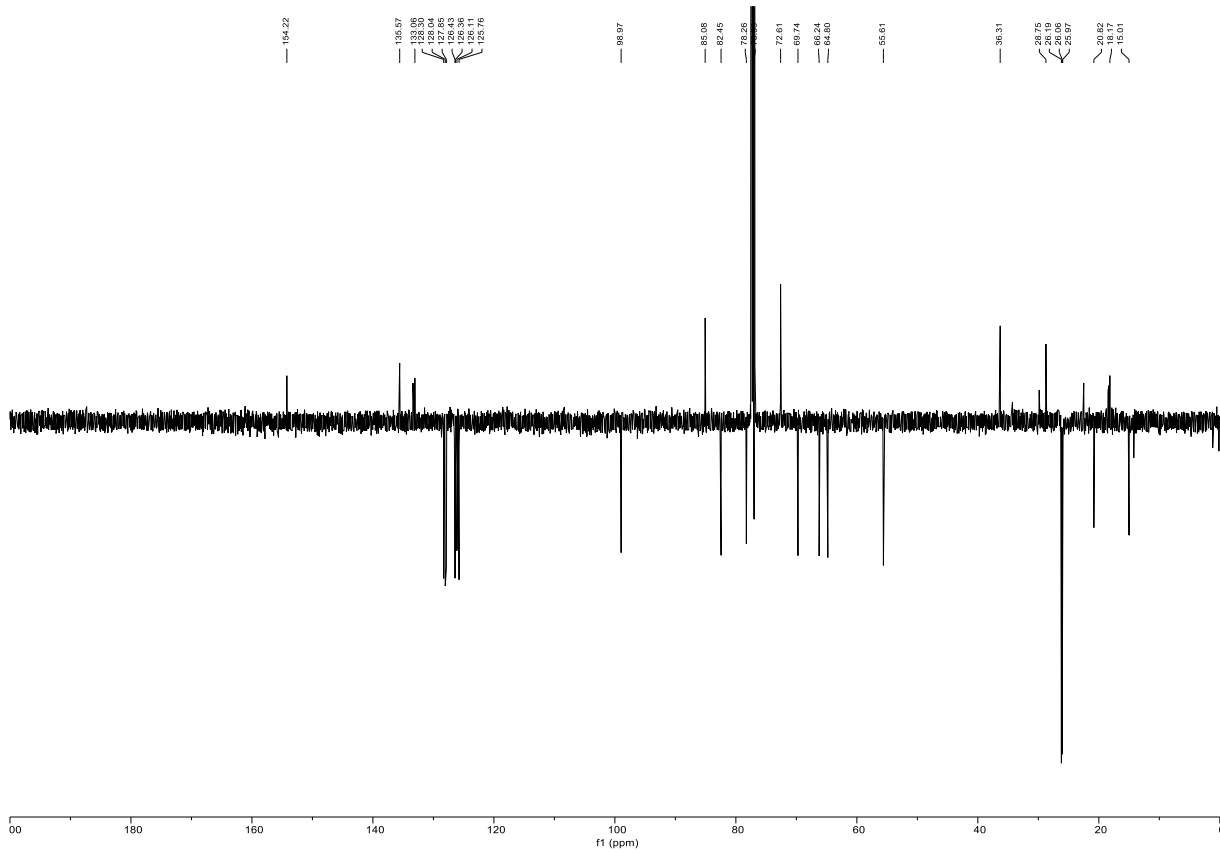

HH-COSY NMR, CDCl<sub>3</sub> of S29

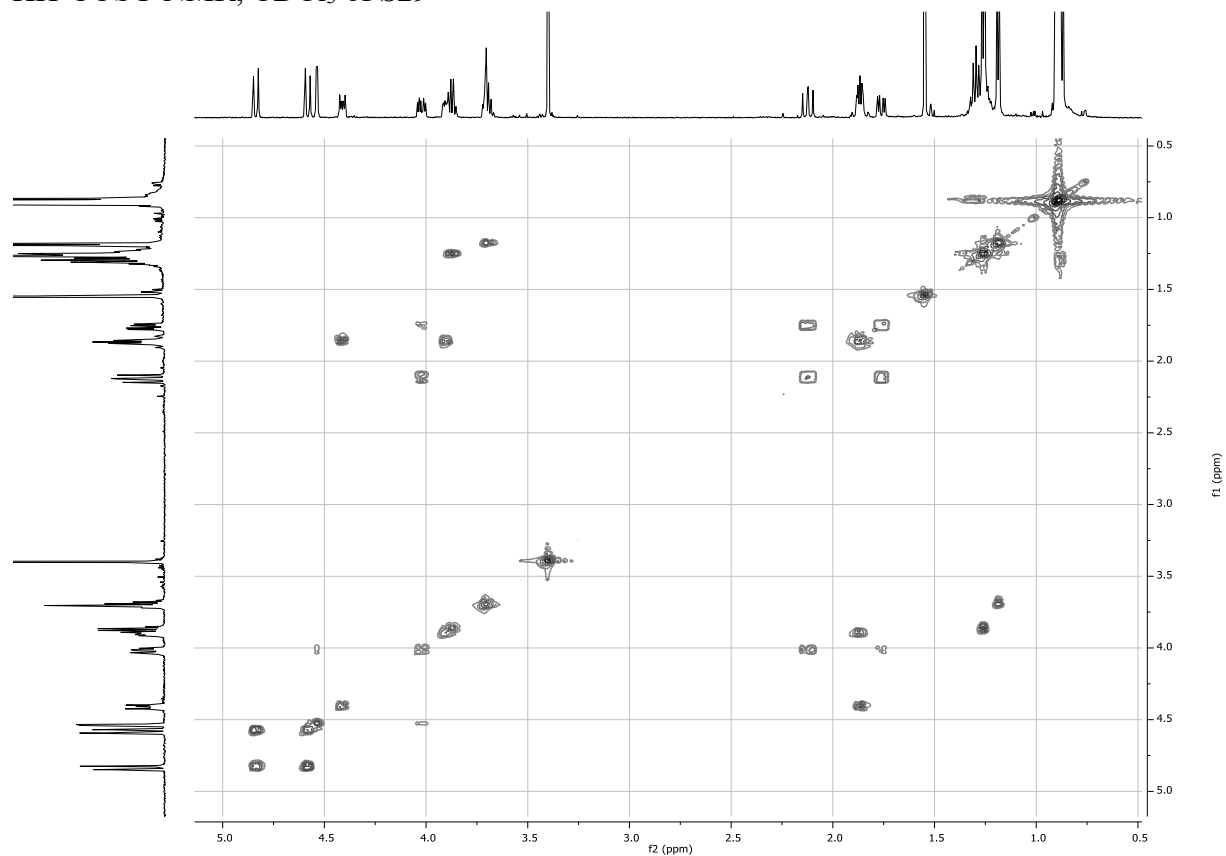

HSQC NMR, CDCl<sub>3</sub> of S29

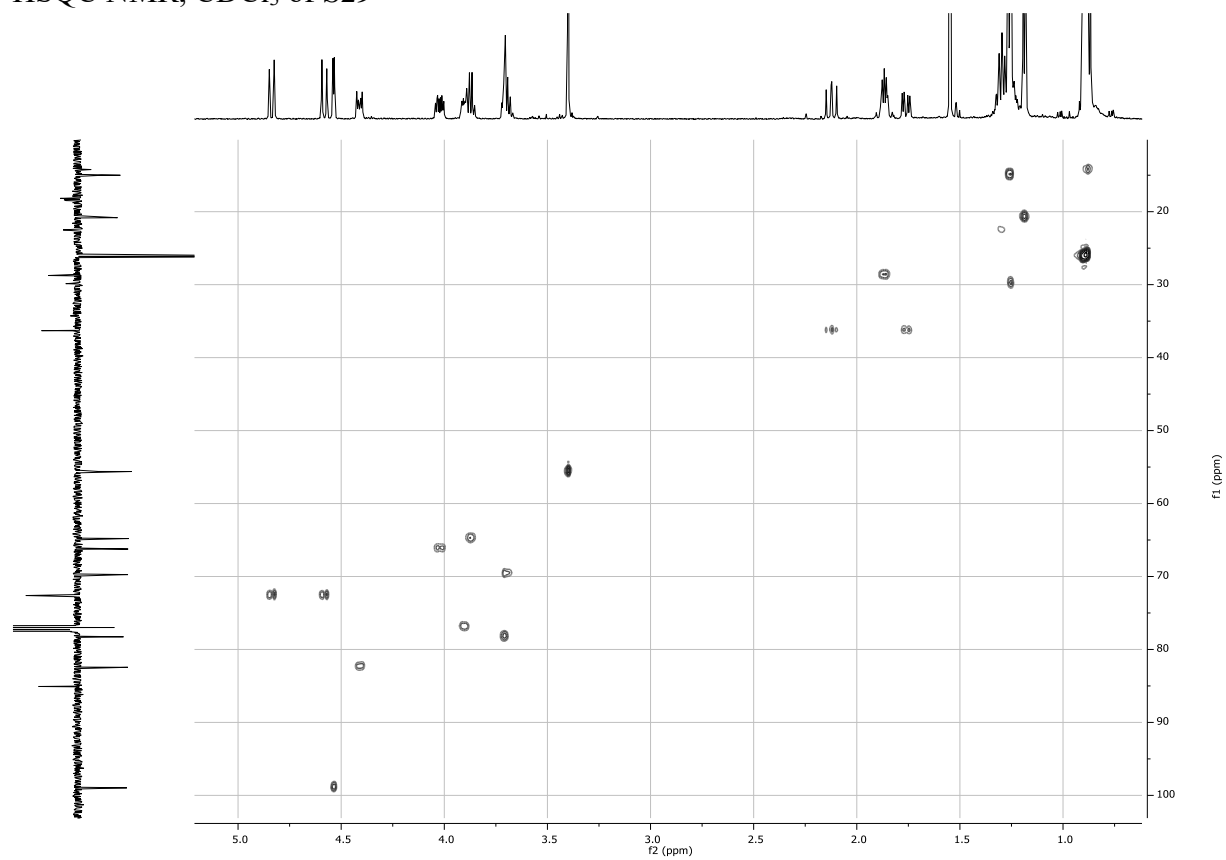

NOESY NMR, CDCl<sub>3</sub> of S29

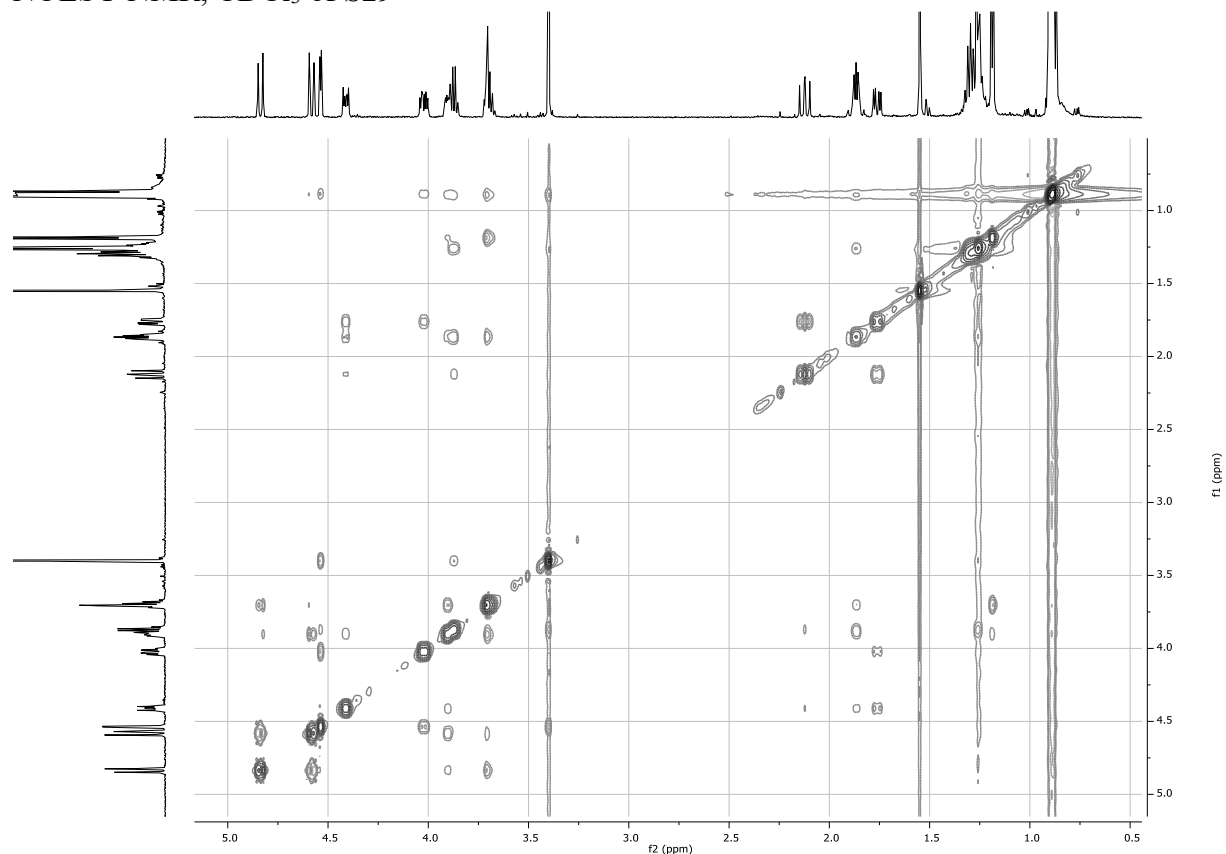

<sup>1</sup>H NMR, 400 MHz, CDCl<sub>3</sub> of S34

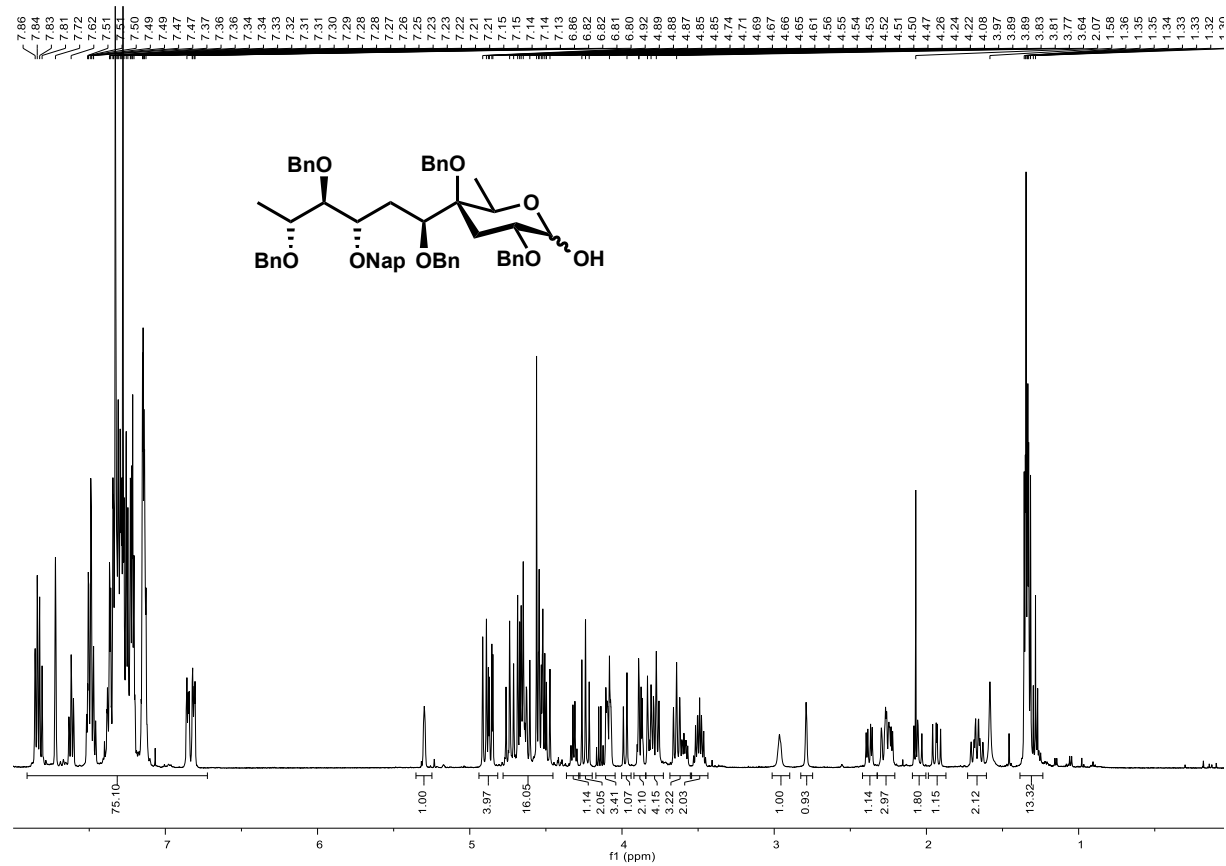

$^{13}\text{C}$  NMR, 101 MHz,  $\text{CDCl}_3$  of S34

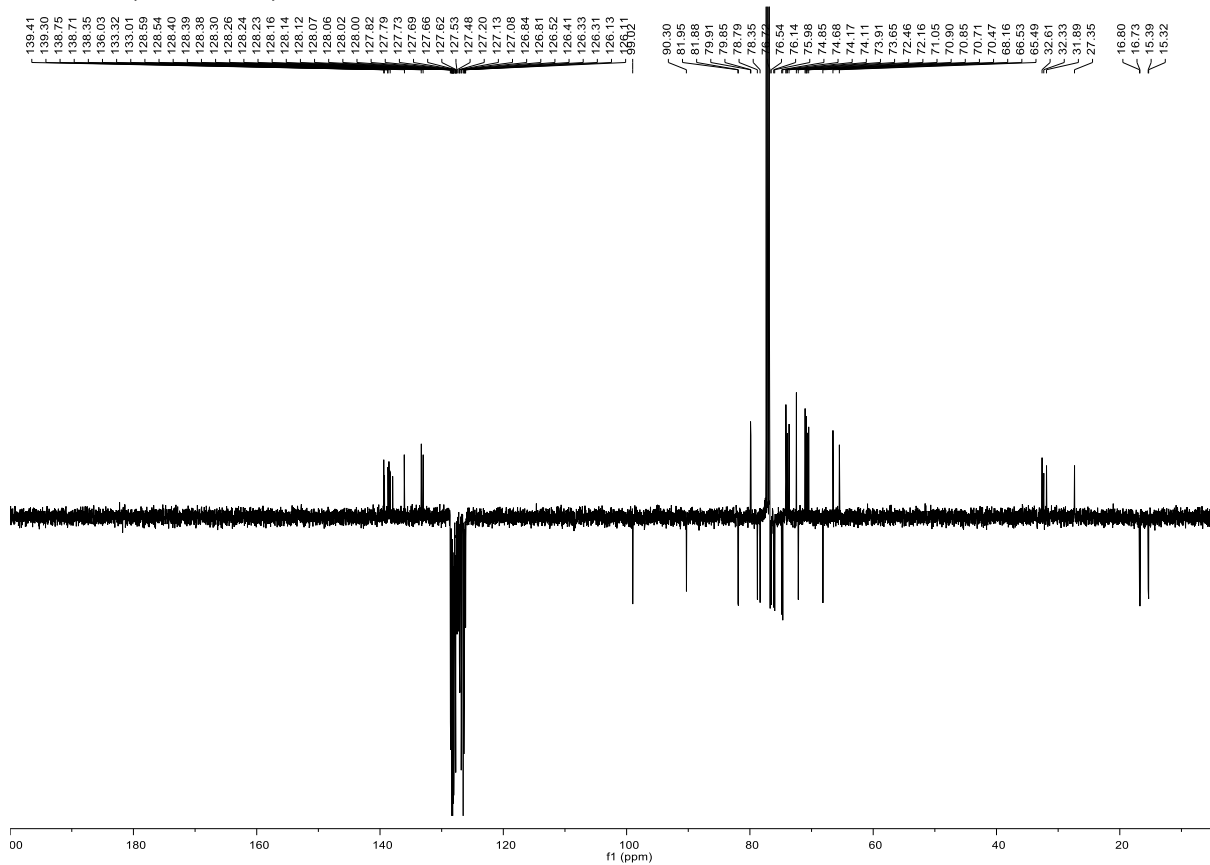

HH-COSY NMR,  $\text{CDCl}_3$  of S34

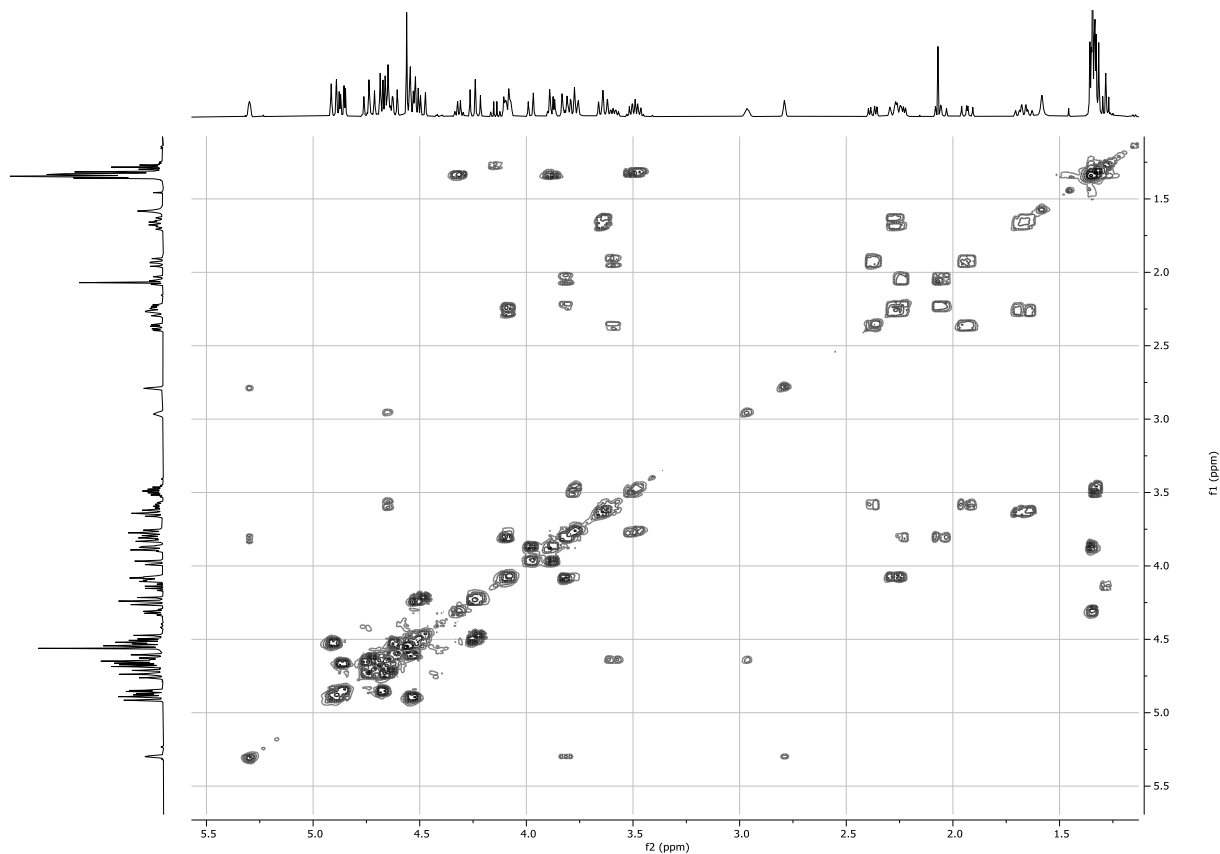



HSQC NMR, CDCl<sub>3</sub> of S34

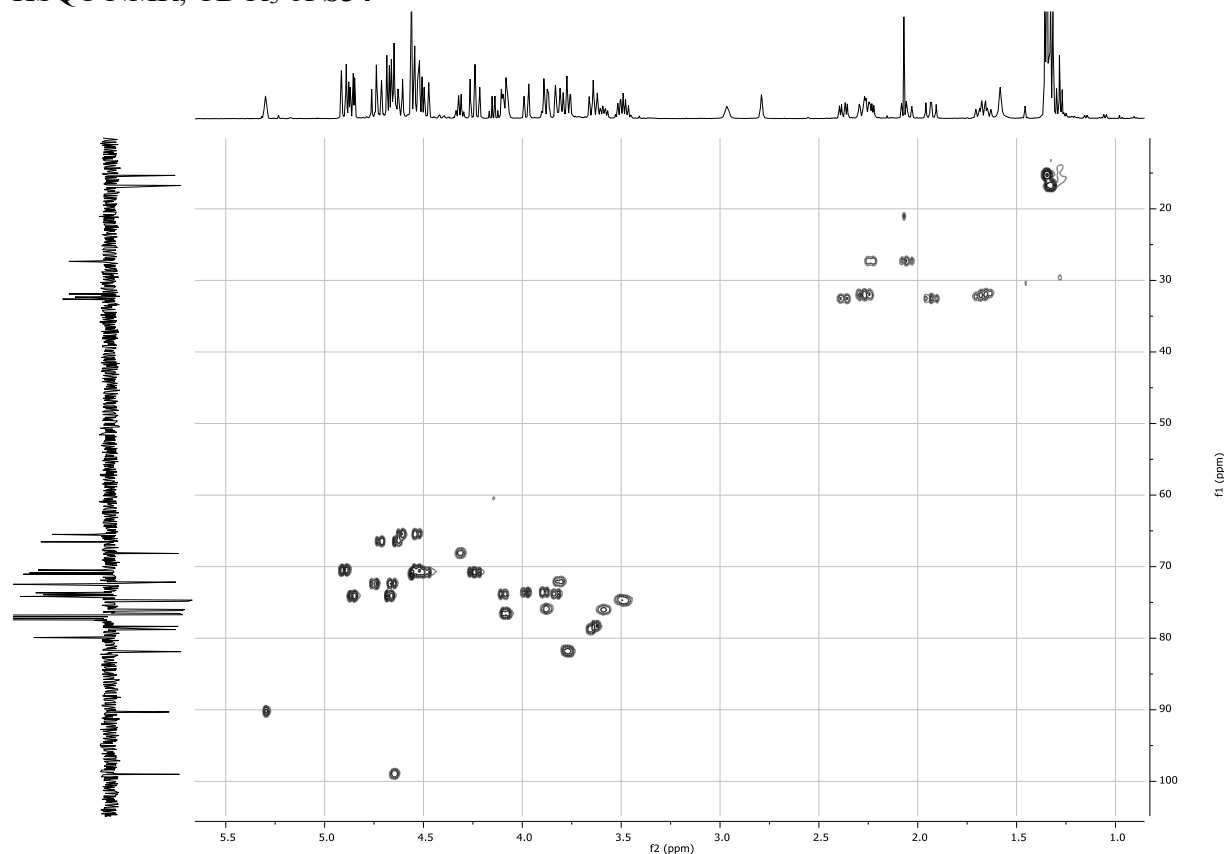

<sup>1</sup>H NMR, 400 MHz, toluene-*d*<sub>8</sub> of S36 (*T* = 233 K)

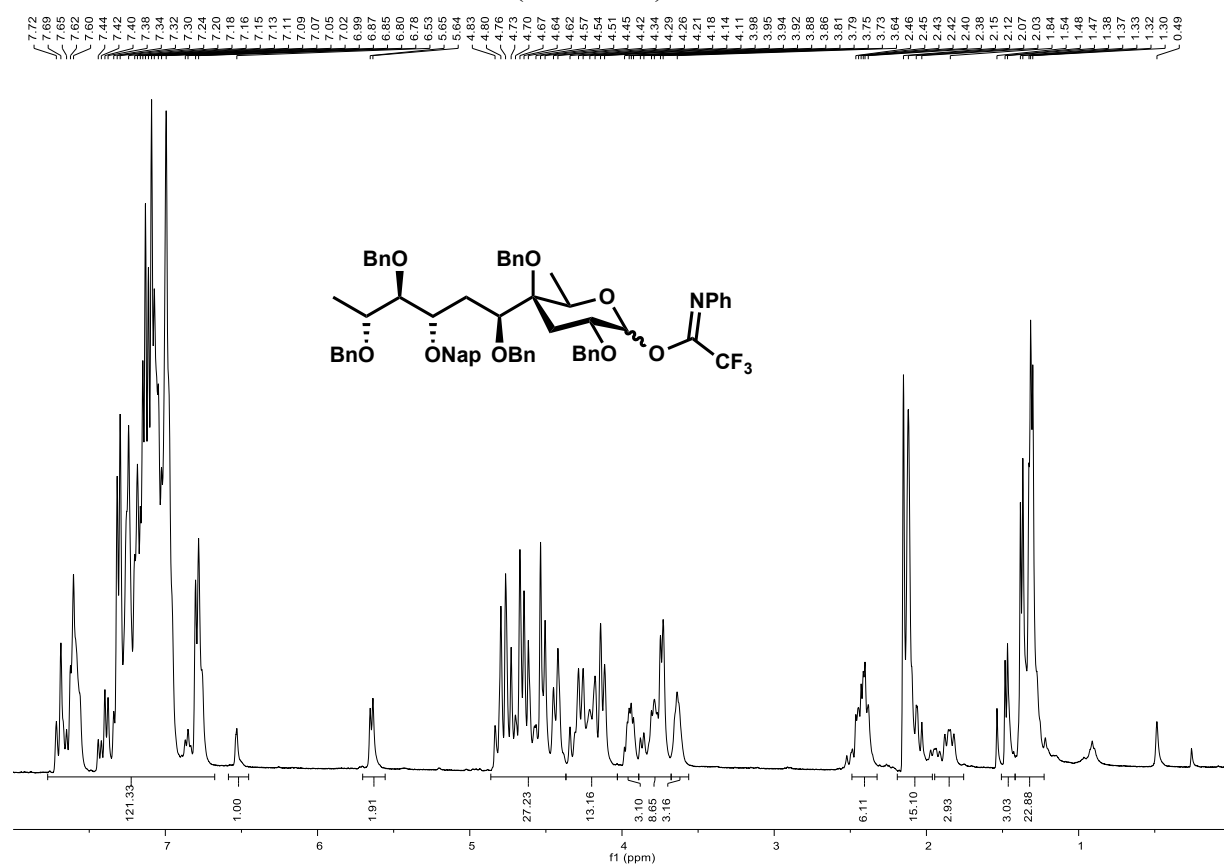

$^{13}\text{C}$  NMR, 101 MHz, toluene- $d_8$  of **S36** ( $T = 233$  K)

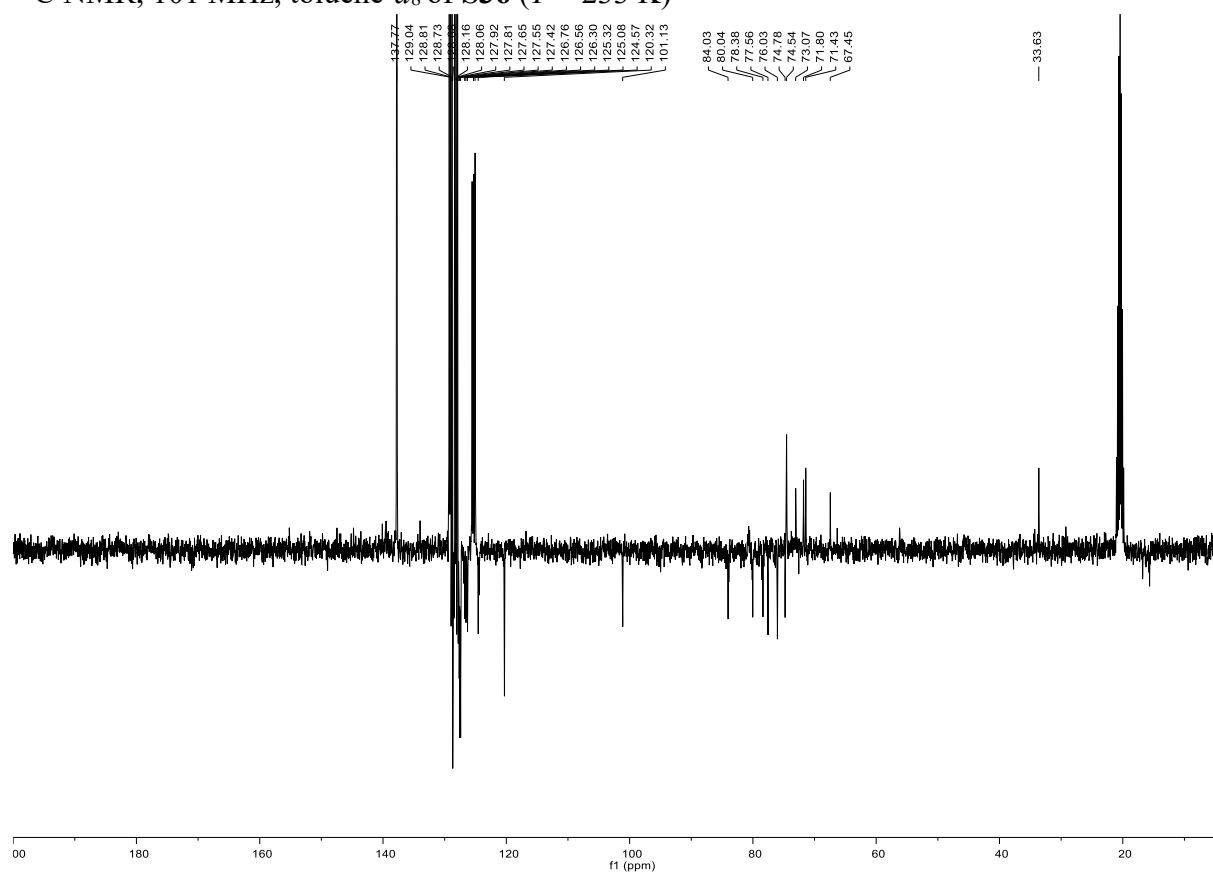

HH-COSY NMR, toluene- $d_8$  of **S36** ( $T = 233$  K)

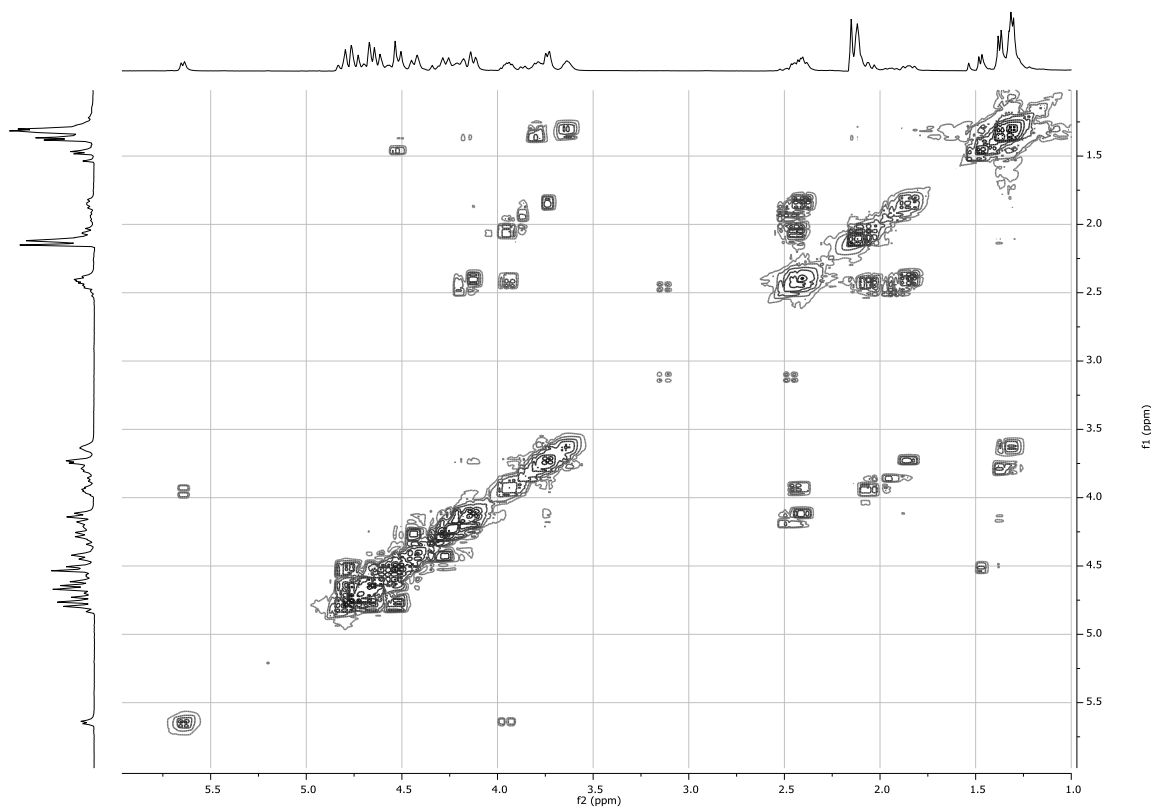

HSQC NMR, toluene- $d_8$  of **S36** ( $T = 233$  K)

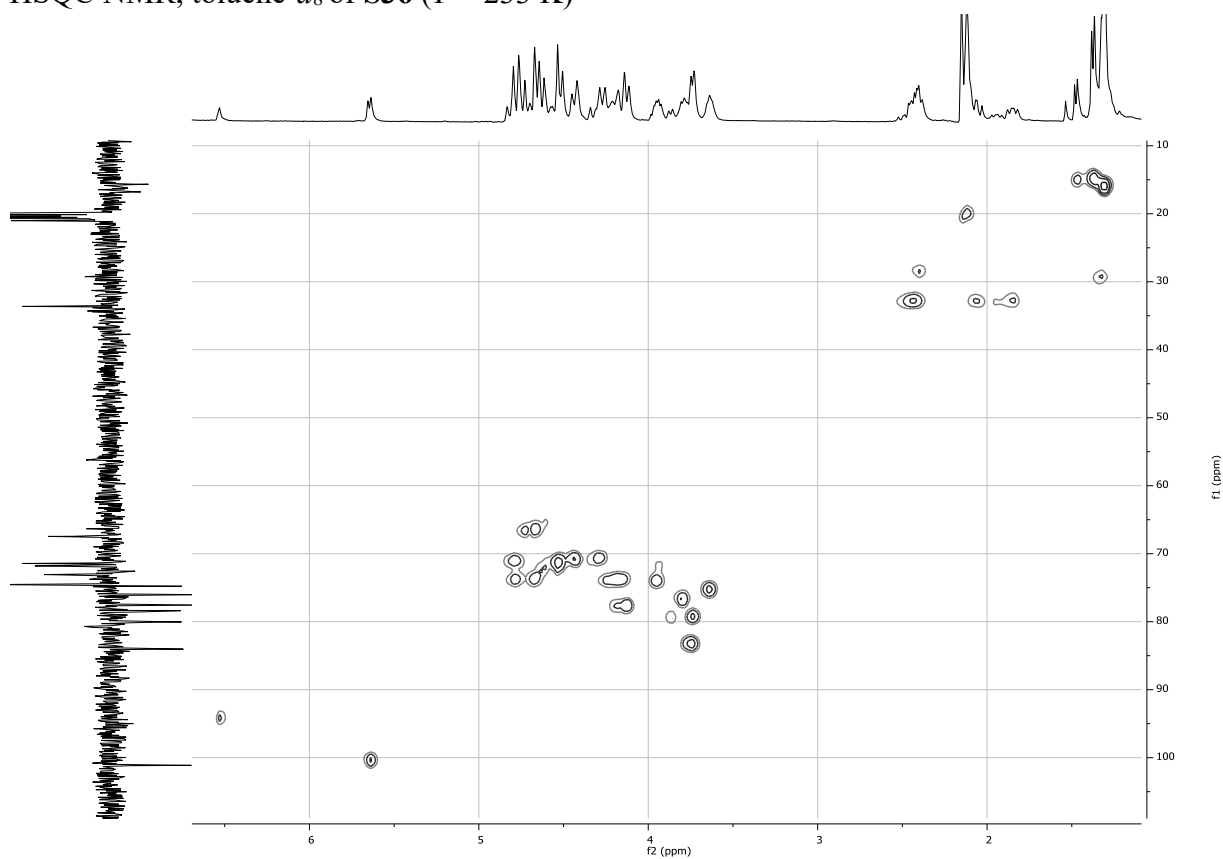

$^1\text{H}$  NMR, 500 MHz,  $\text{CDCl}_3$  of **31**

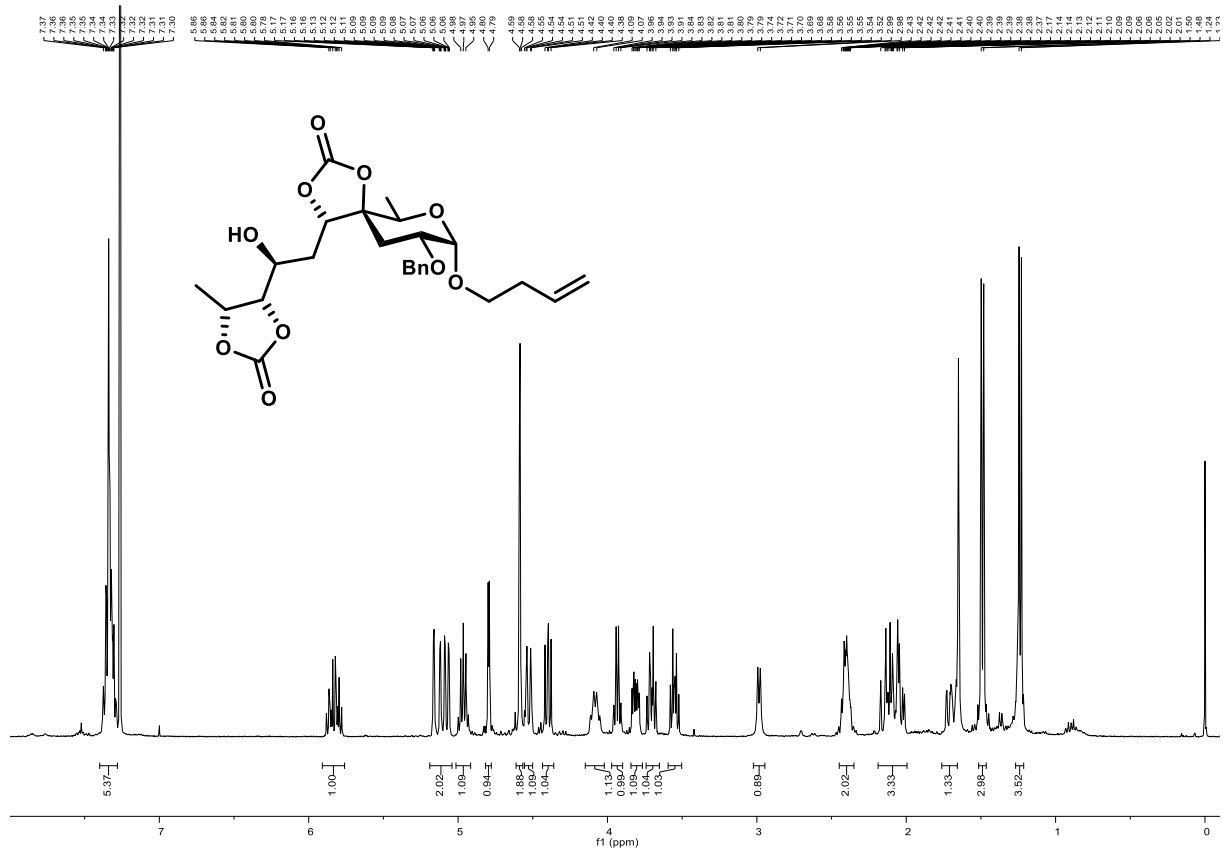

$^{13}\text{C}$  NMR, 126 MHz,  $\text{CDCl}_3$  of **31**

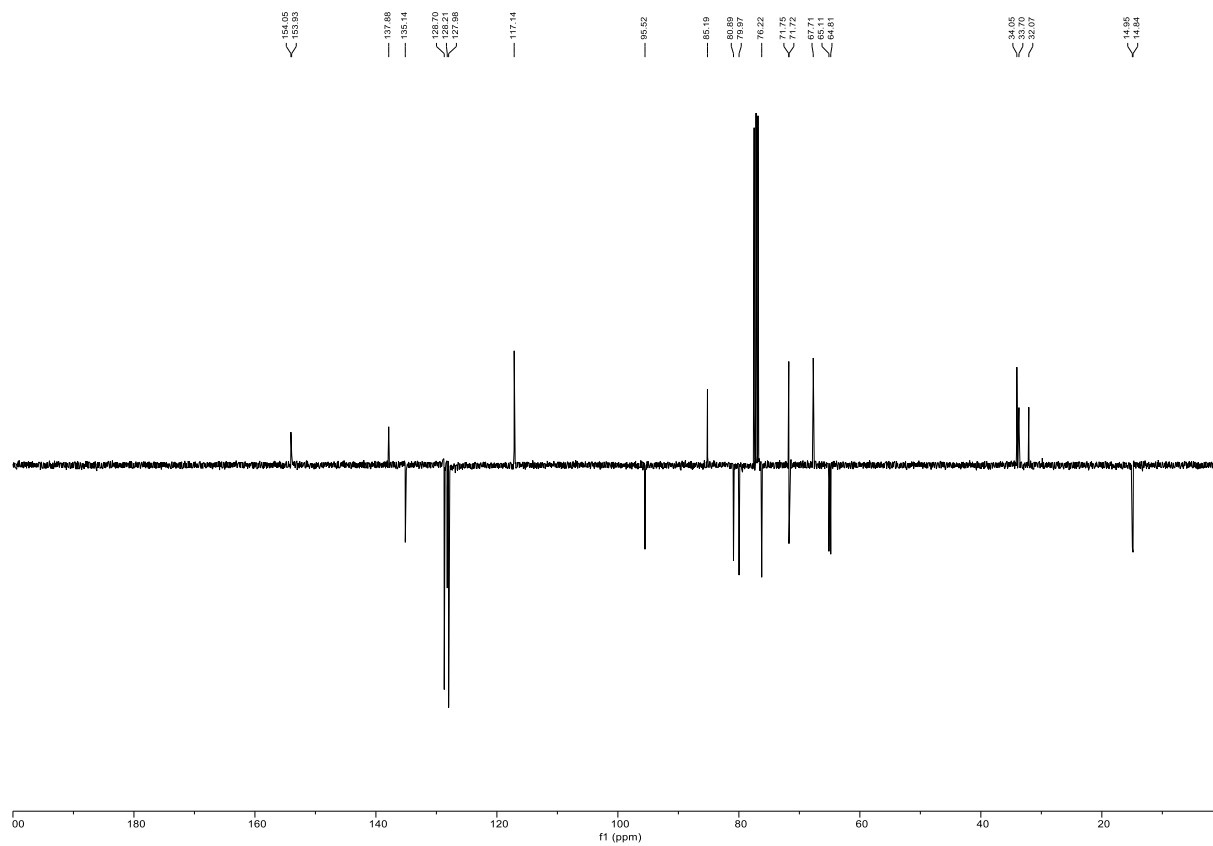

HH-COSY NMR,  $\text{CDCl}_3$  of **31**

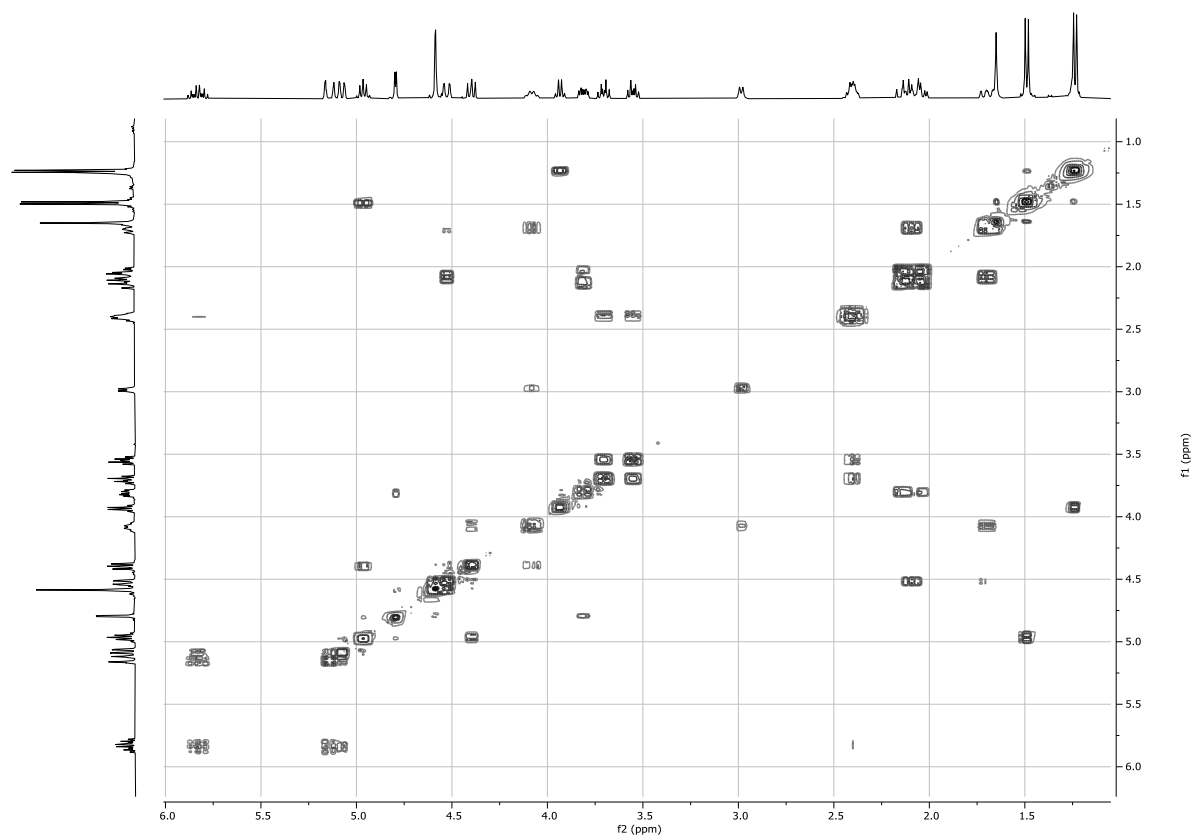

HSQC NMR, CDCl<sub>3</sub> of **31**

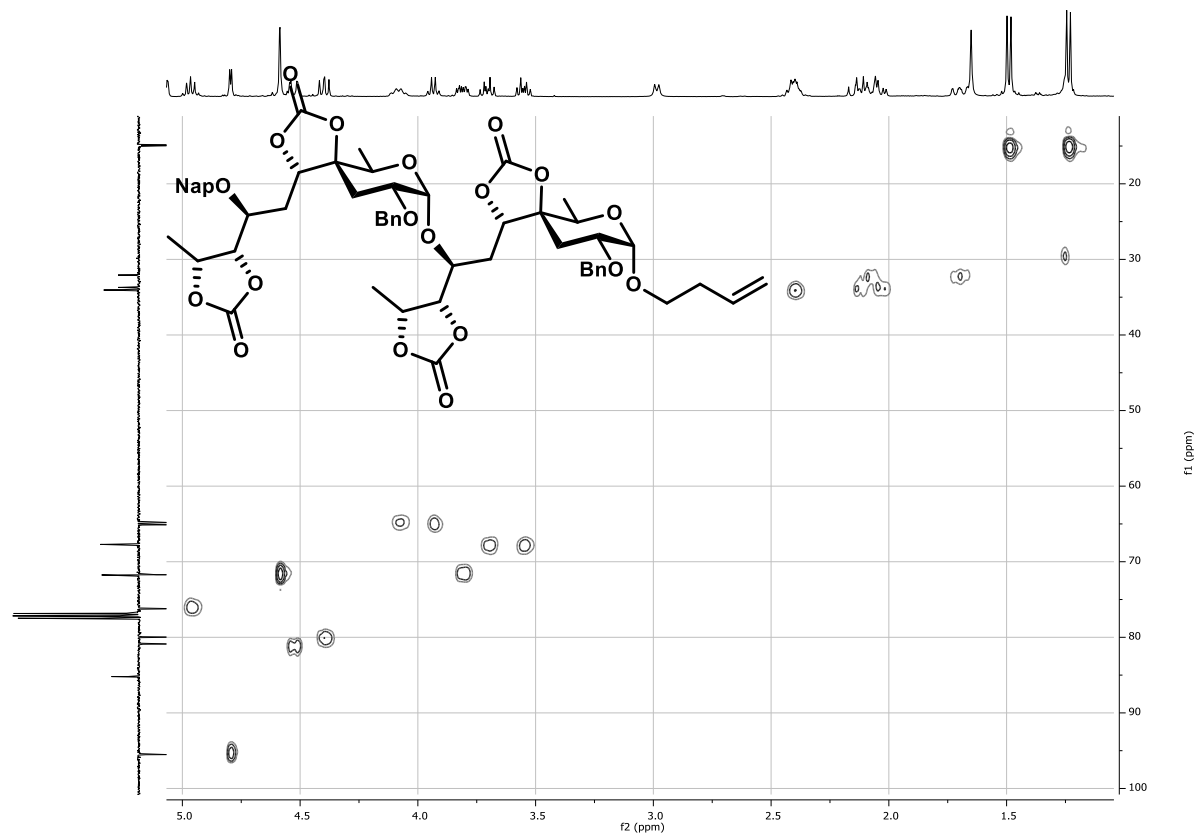

<sup>1</sup>H NMR, 400 MHz, CDCl<sub>3</sub> of **32**

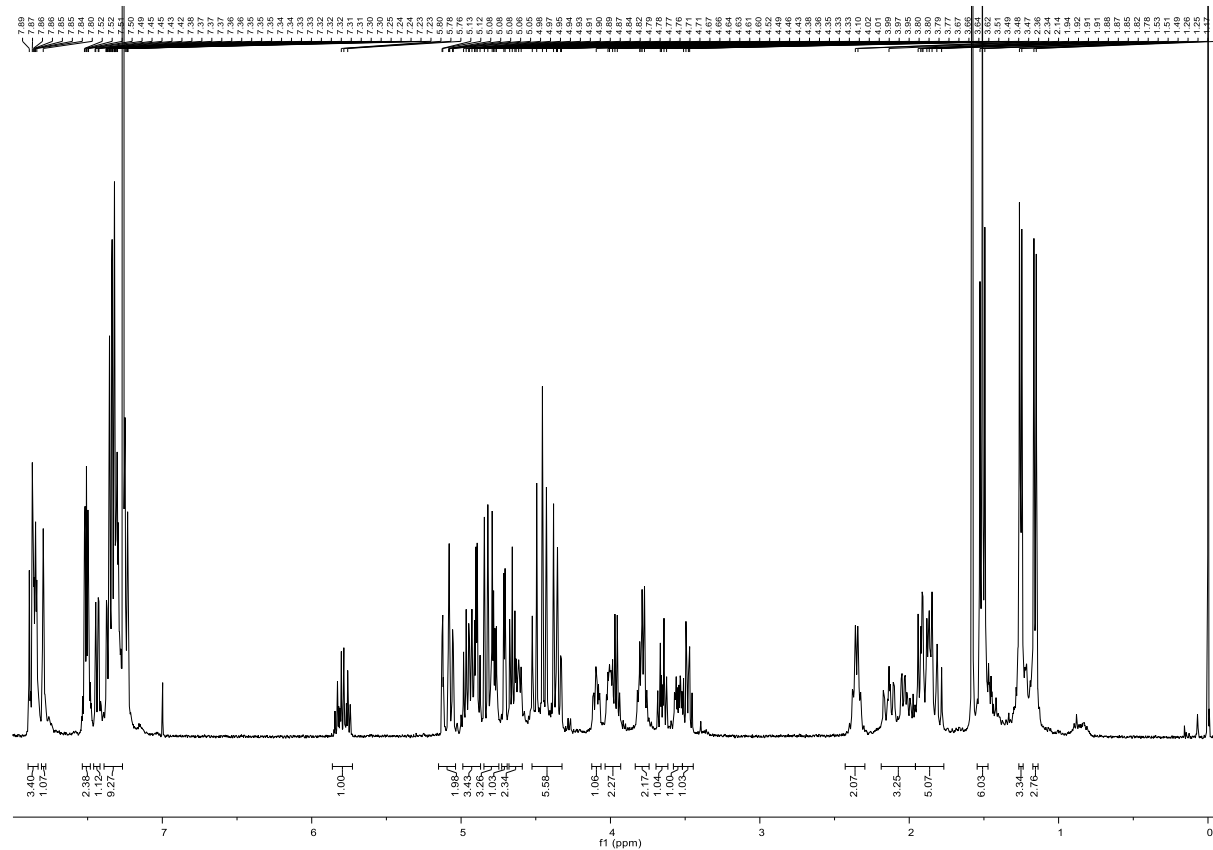

$^{13}\text{C}$  NMR, 101 MHz,  $\text{CDCl}_3$  of **32**

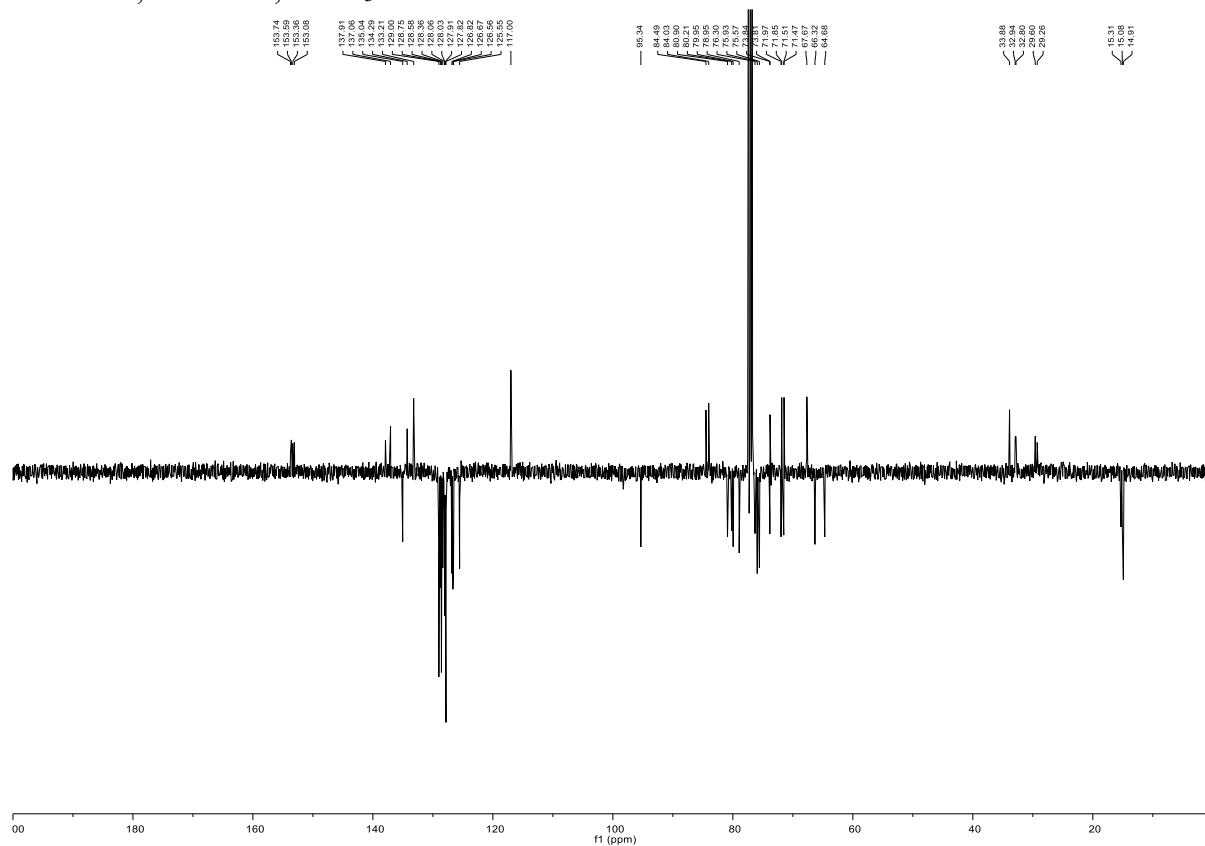

HH-COSY NMR,  $\text{CDCl}_3$  of **32**

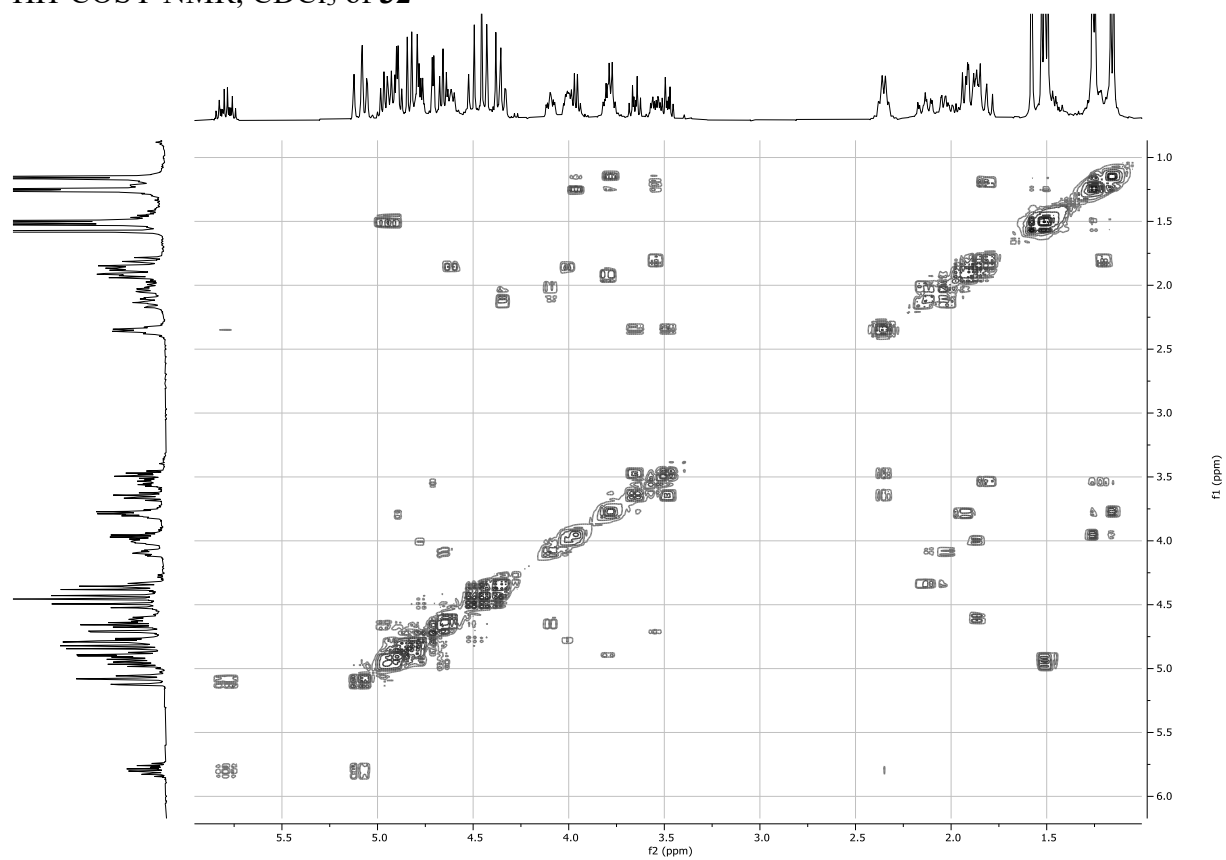

HSQC NMR, CDCl<sub>3</sub> of **32**

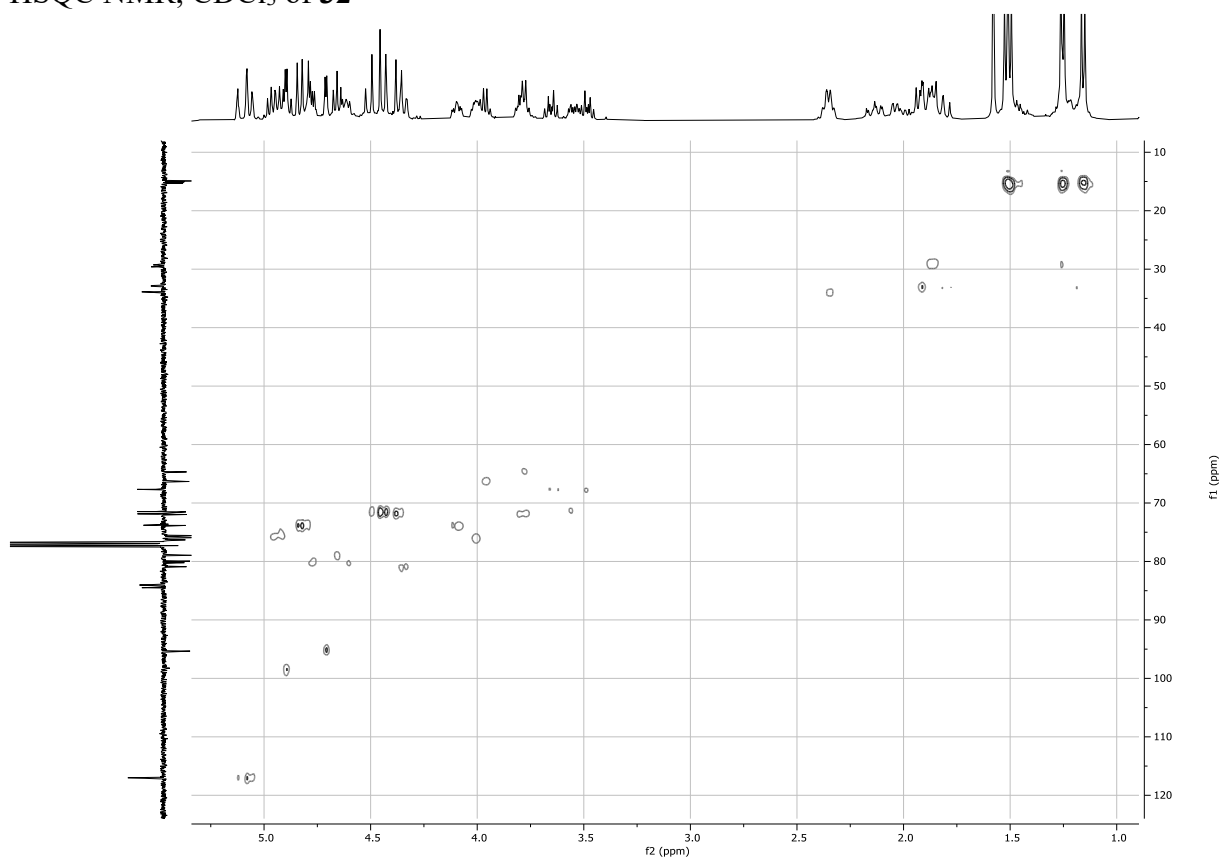

HMBC NMR, CDCl<sub>3</sub> of **32**

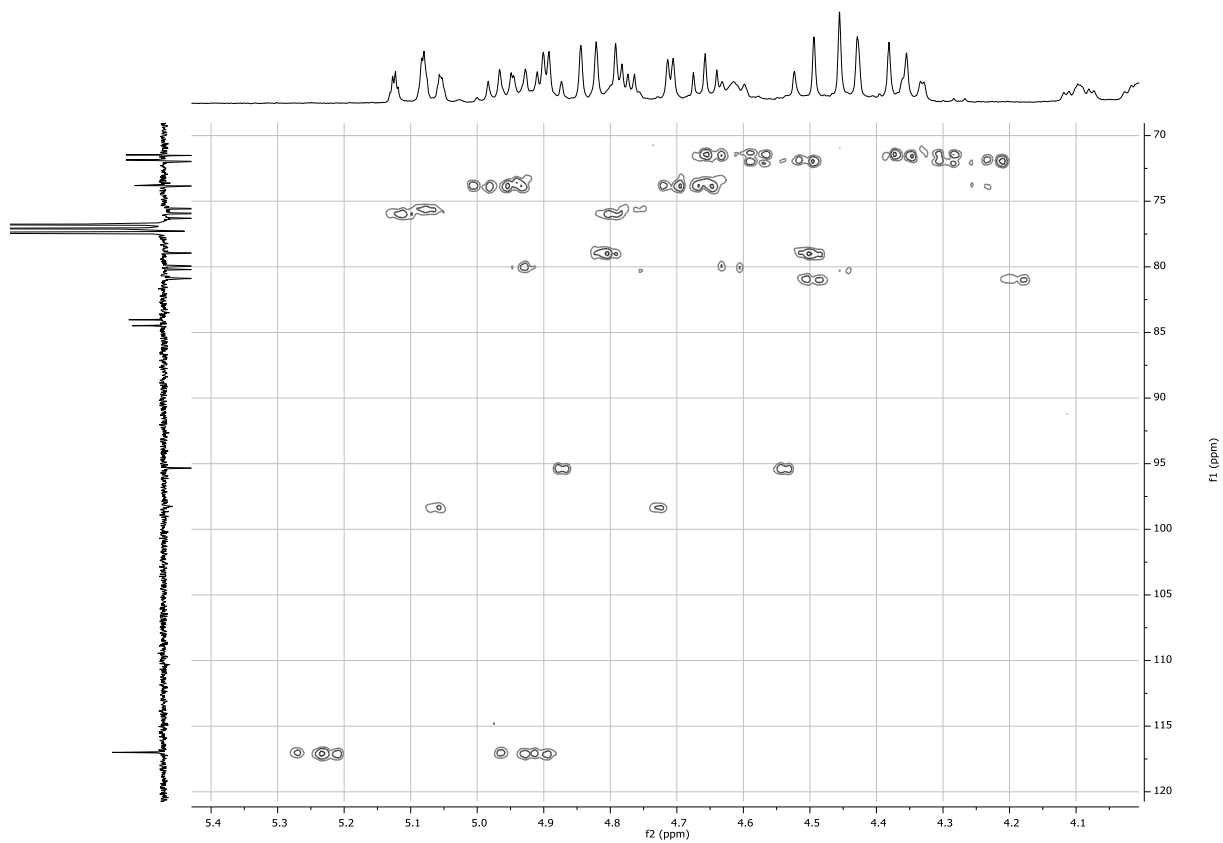

<sup>1</sup>H NMR, 500 MHz, CDCl<sub>3</sub> of **33**

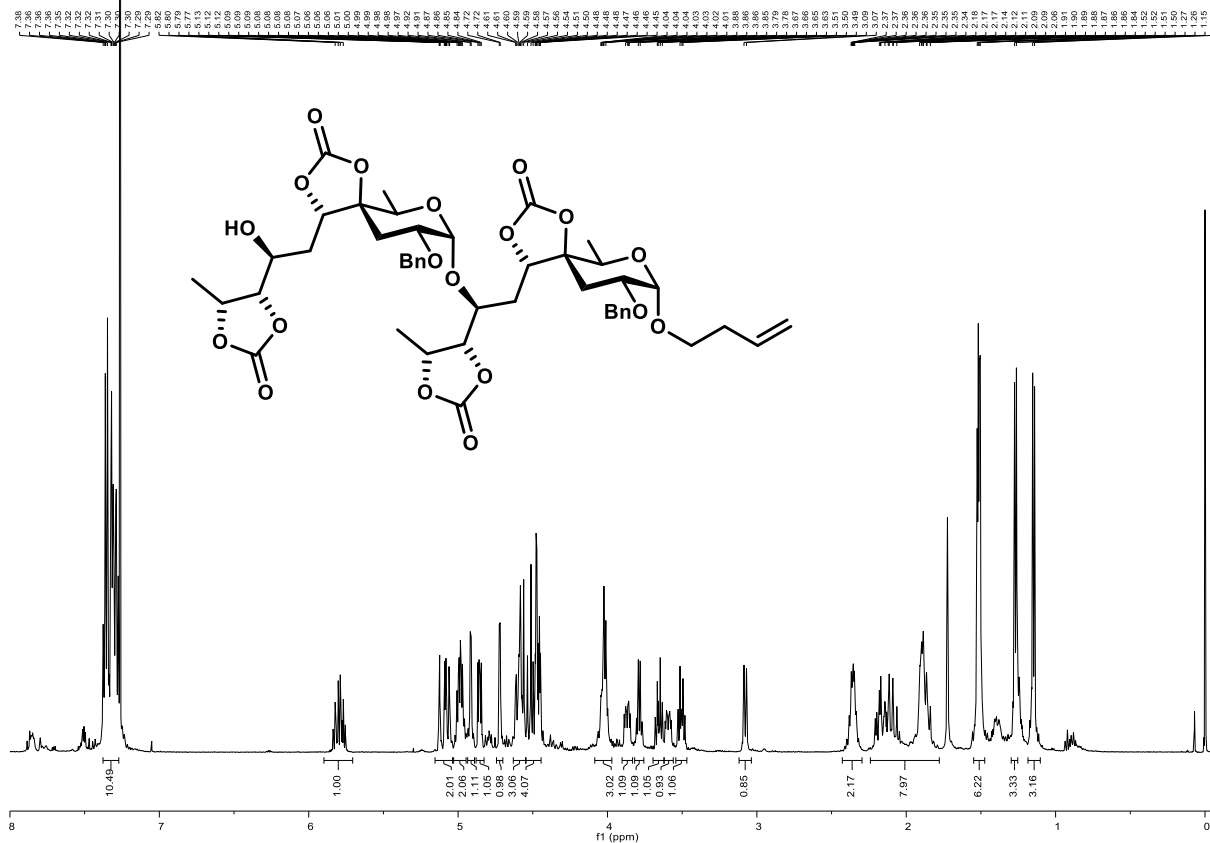

<sup>13</sup>C NMR, 126 MHz, CDCl<sub>3</sub> of **33**

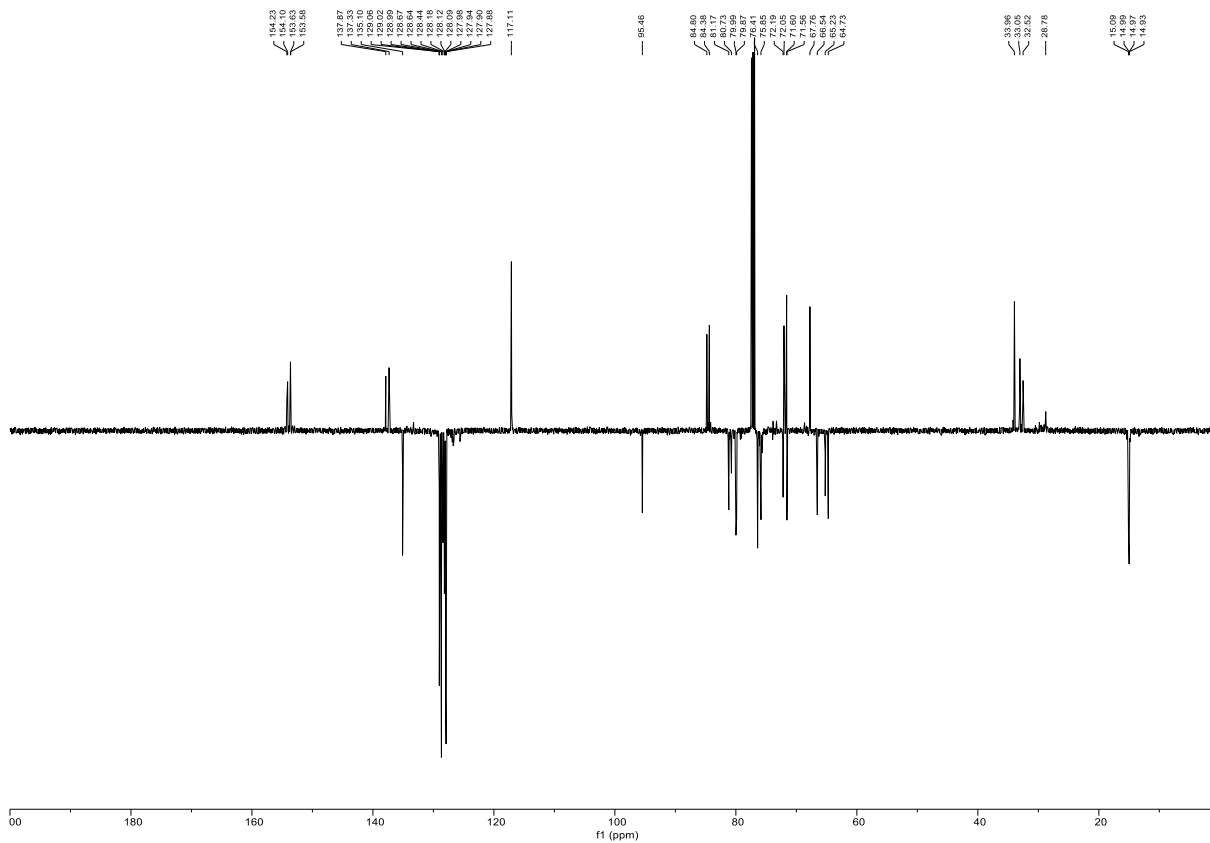



HH-COSY NMR, CDCl<sub>3</sub> of **33**

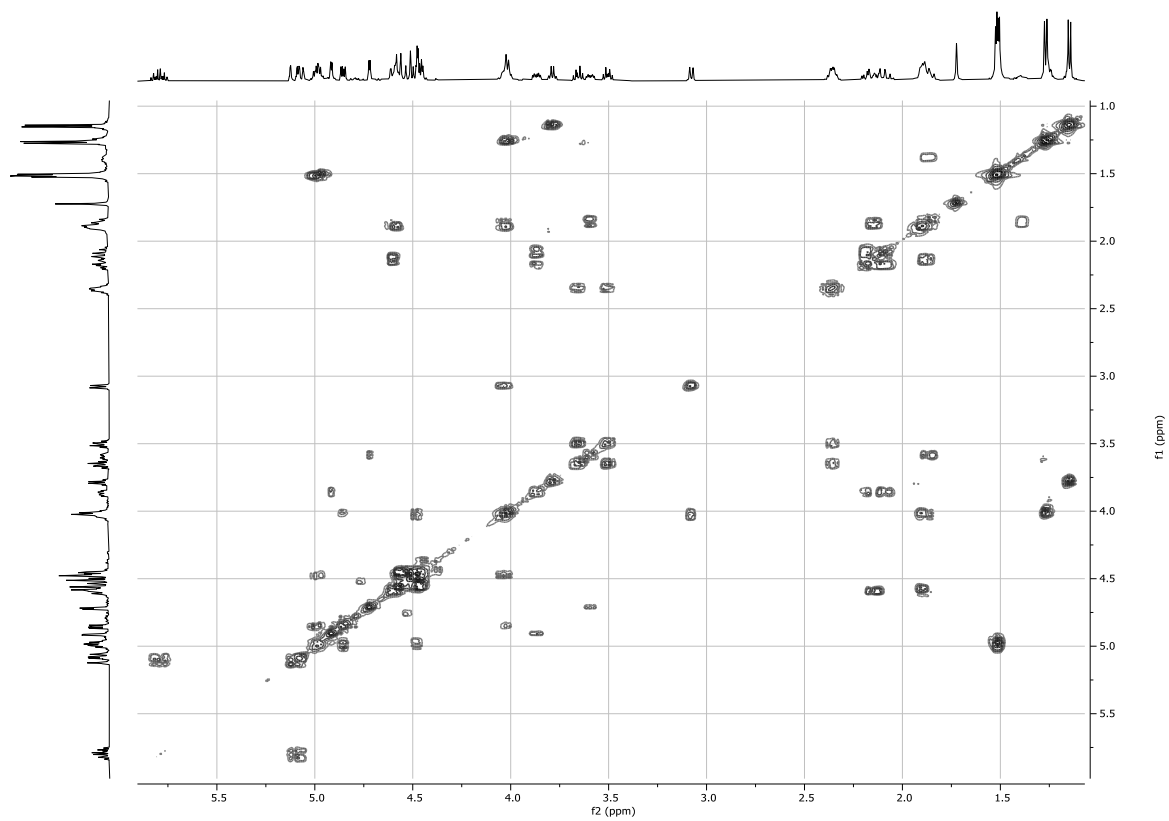

HSQC NMR, CDCl<sub>3</sub> of **33**

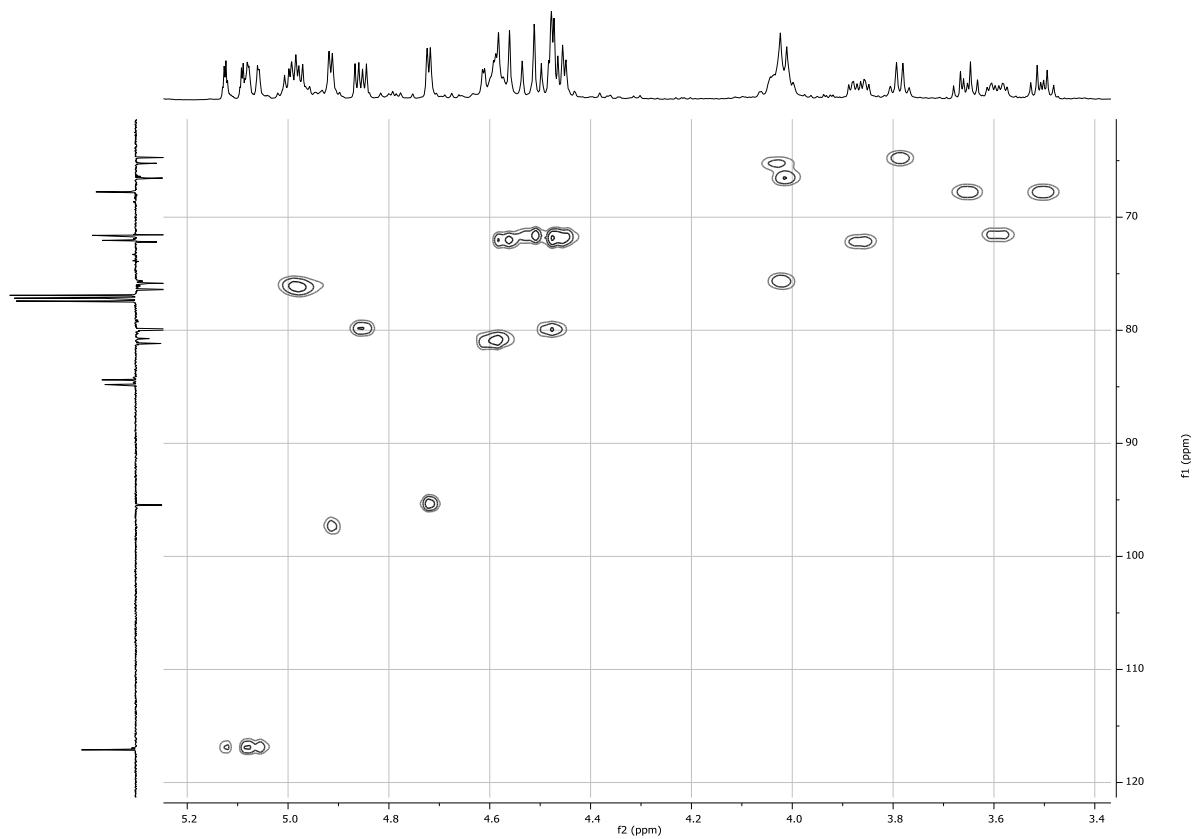

<sup>1</sup>H NMR, 500 MHz, CDCl<sub>3</sub> of **34**

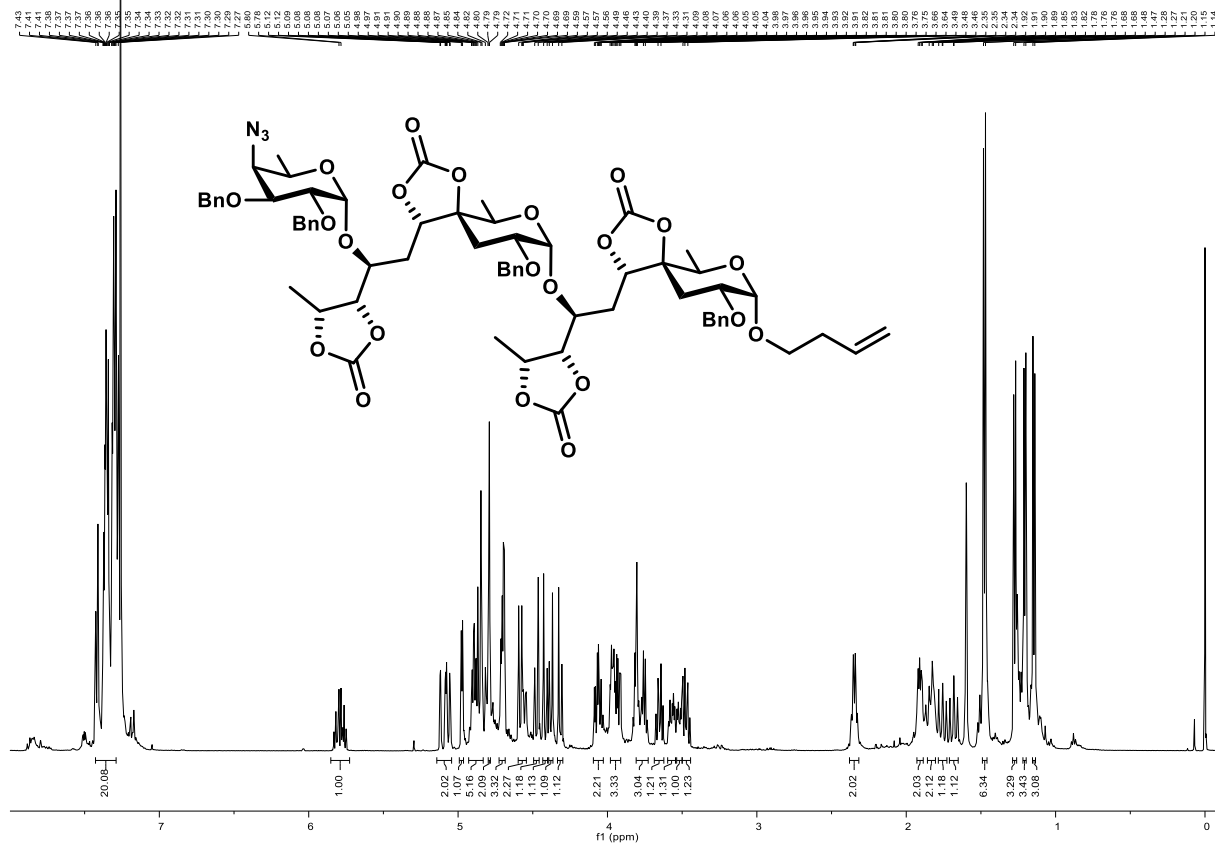

<sup>13</sup>C NMR, 126 MHz, CDCl<sub>3</sub> of **34**

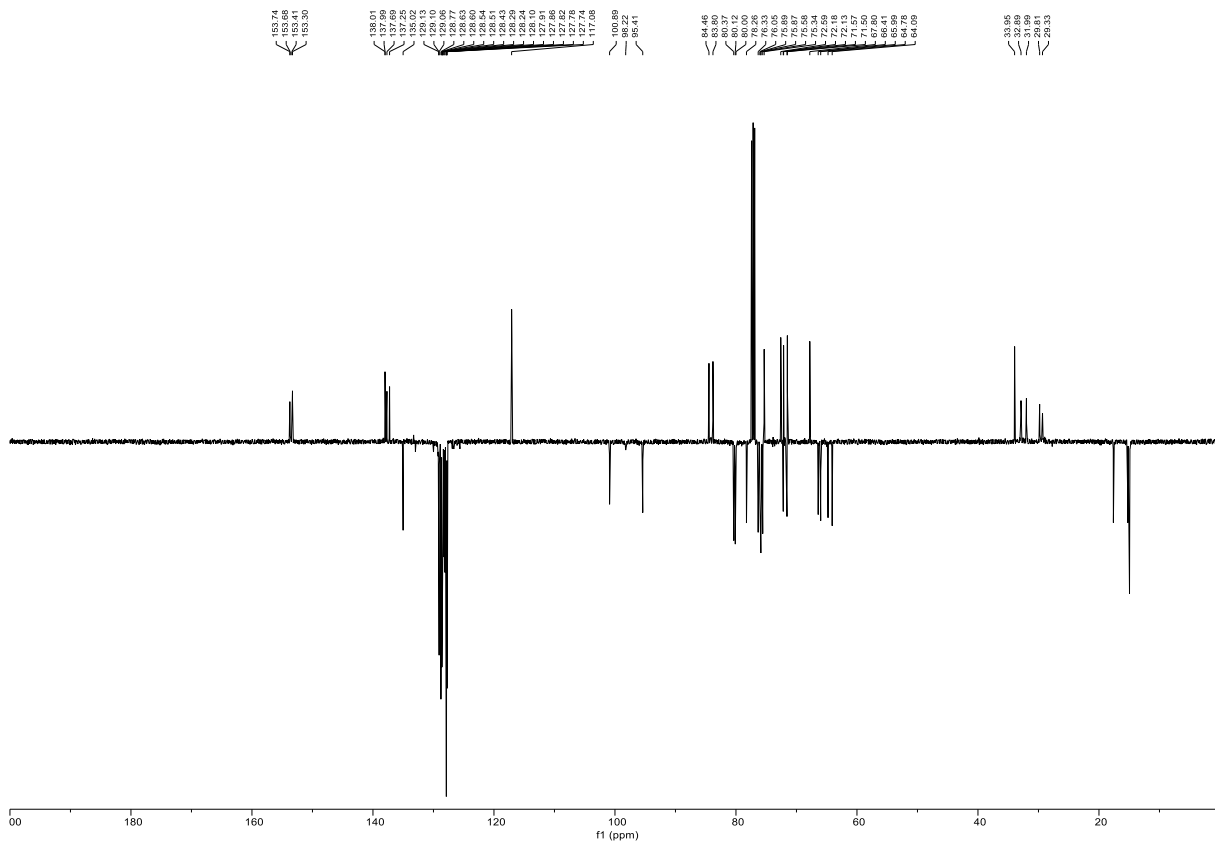

HH-COSY NMR, CDCl<sub>3</sub> of **34**

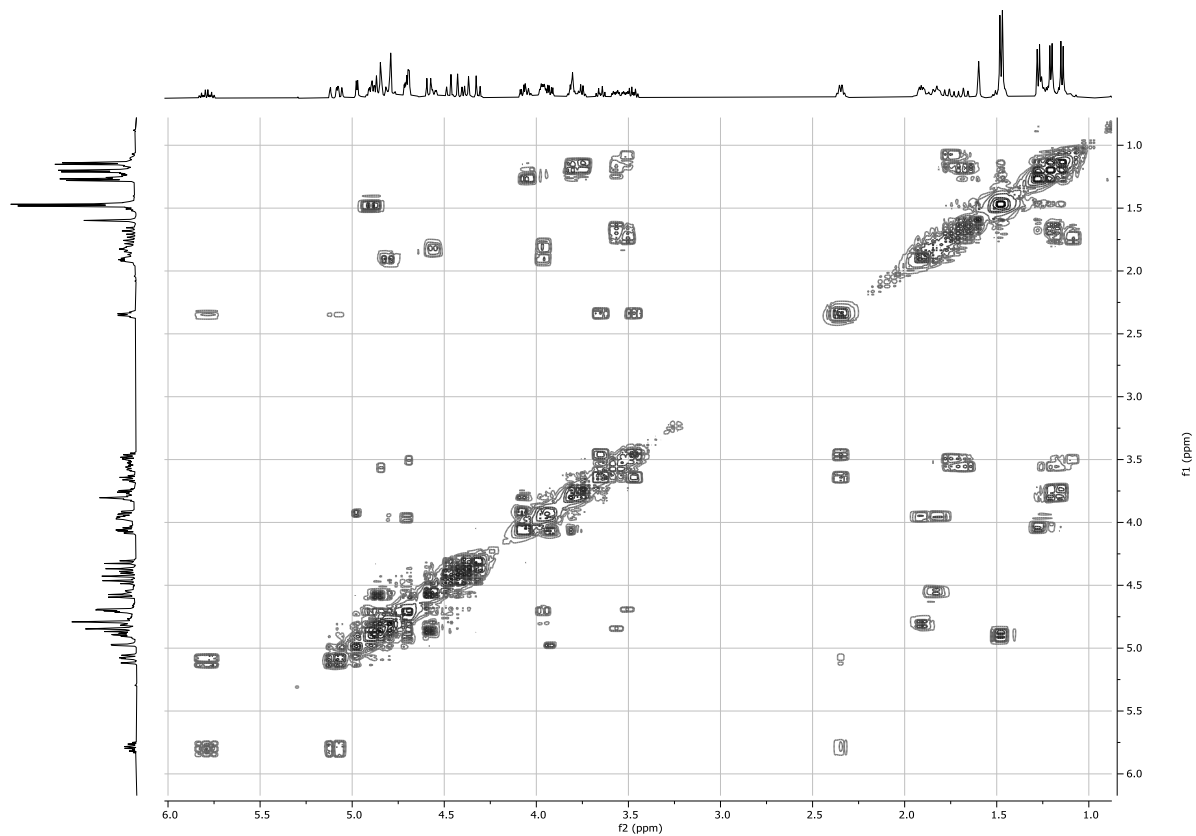

HSQC NMR, CDCl<sub>3</sub> of **34**

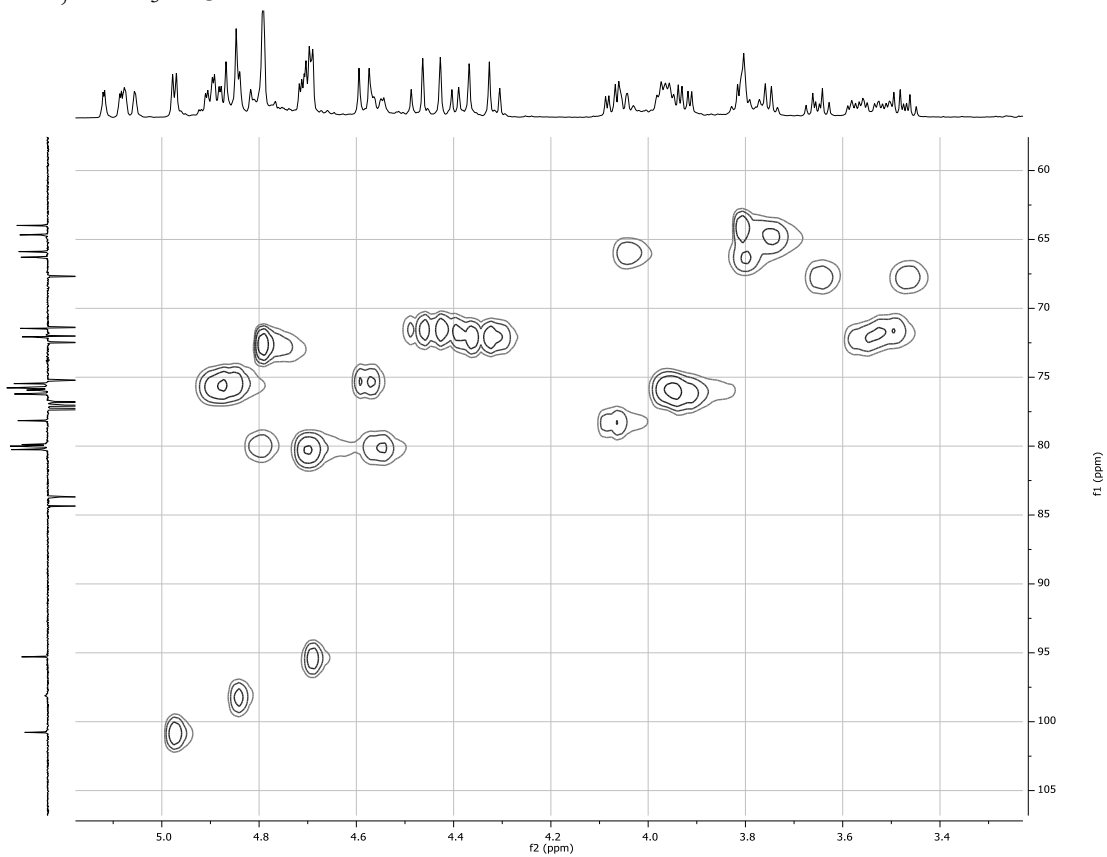

HMBC-GATED NMR,  $\text{CDCl}_3$  of **34**

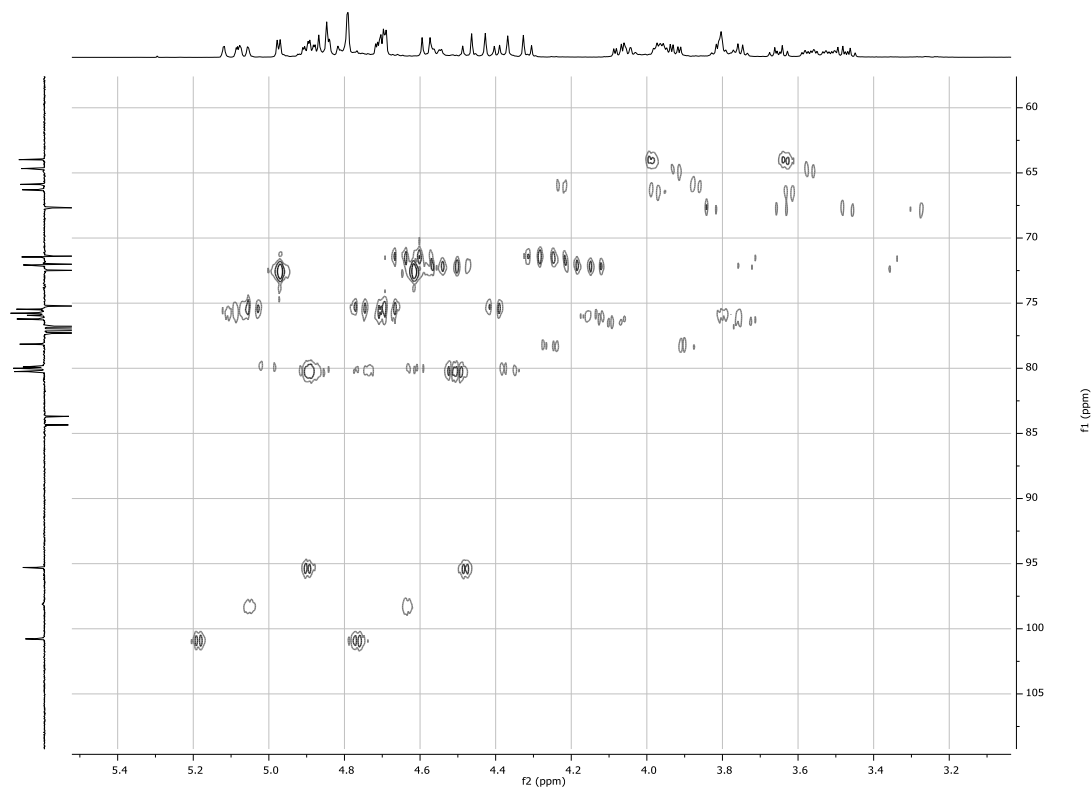

$^1\text{H}$  NMR, 600 MHz,  $\text{CDCl}_3$  of **35**

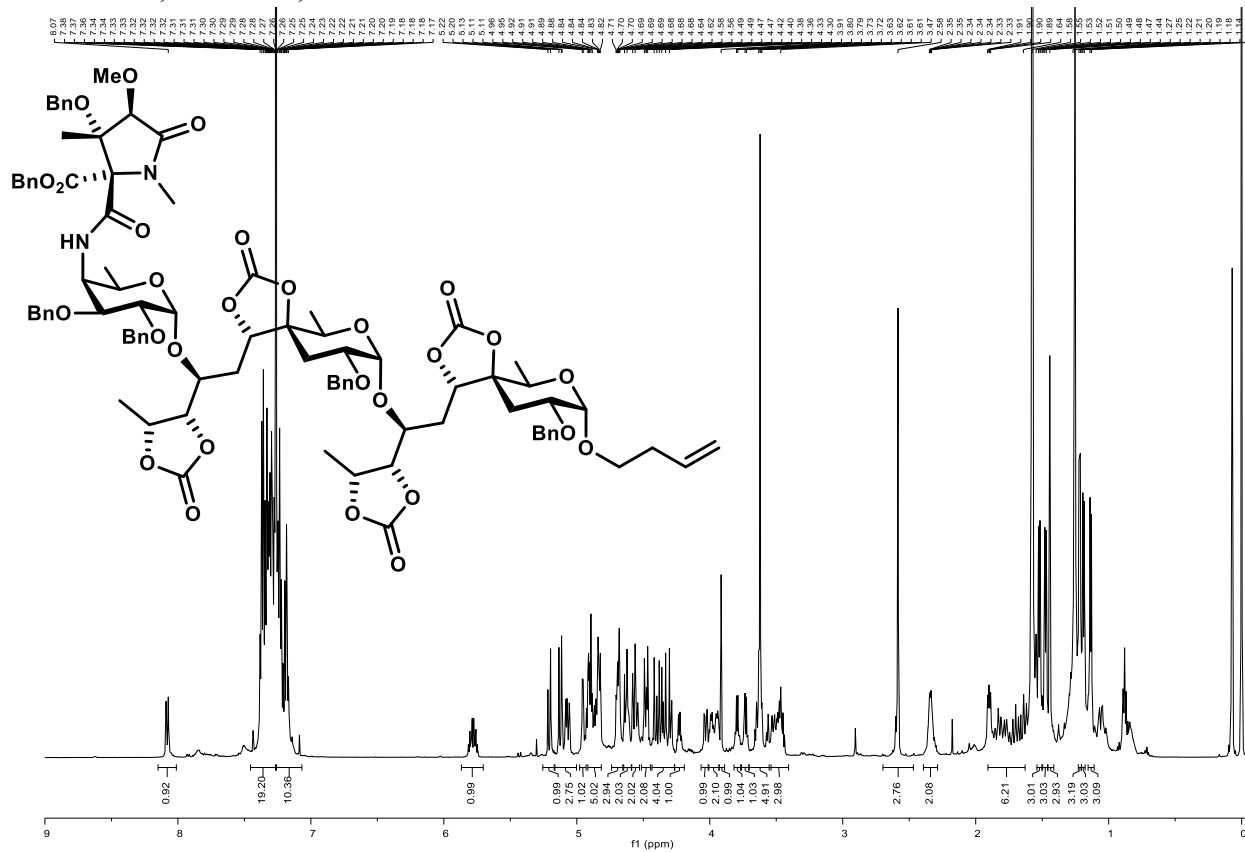

<sup>13</sup>C NMR, 151 MHz, CDCl<sub>3</sub> of **35**

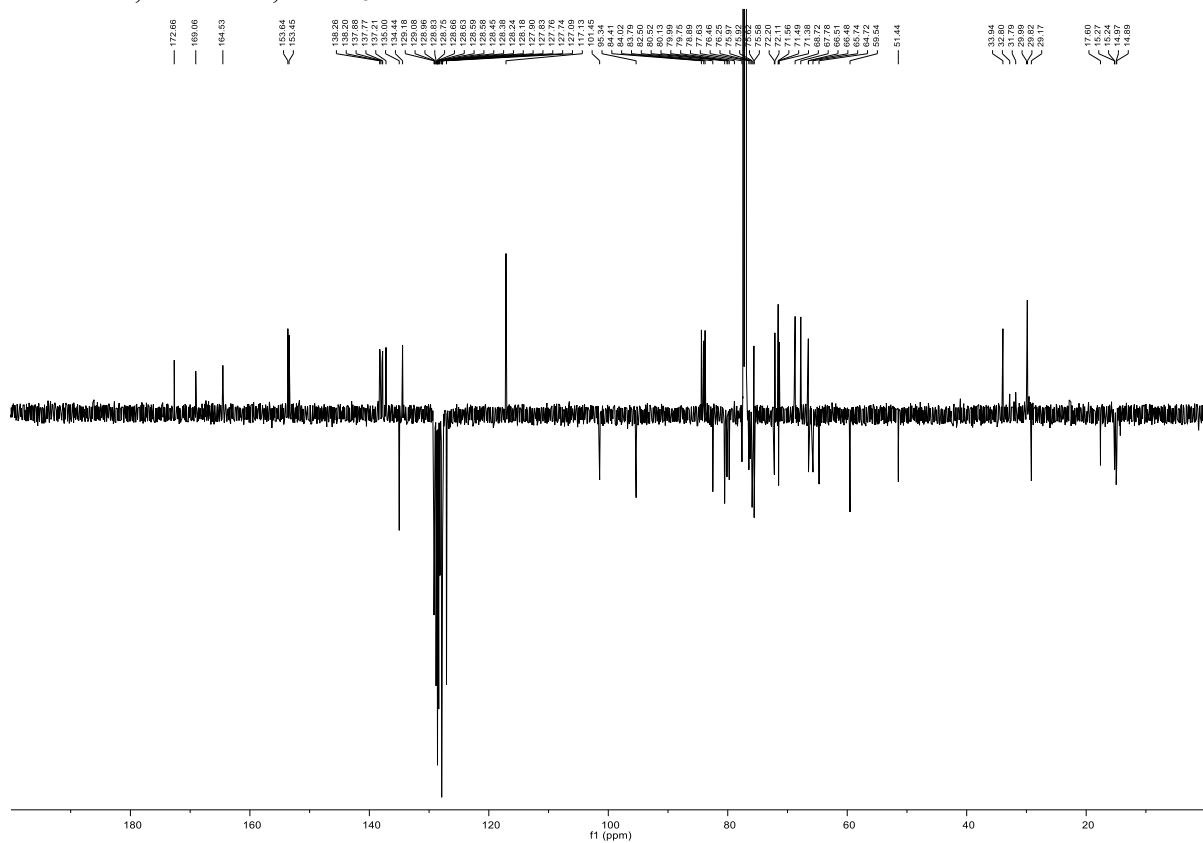

HH-COSY NMR, CDCl<sub>3</sub> of **35**

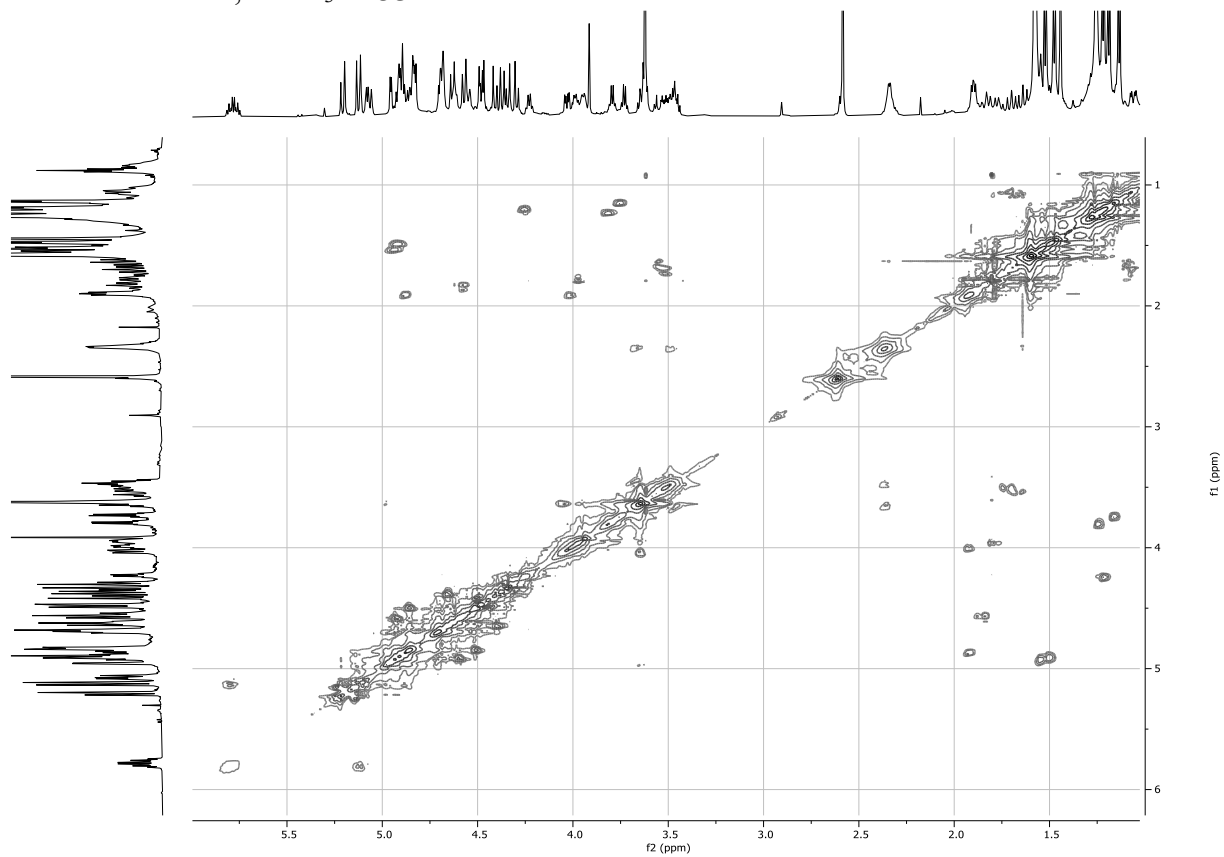

HSQC NMR, CDCl<sub>3</sub> of **35**

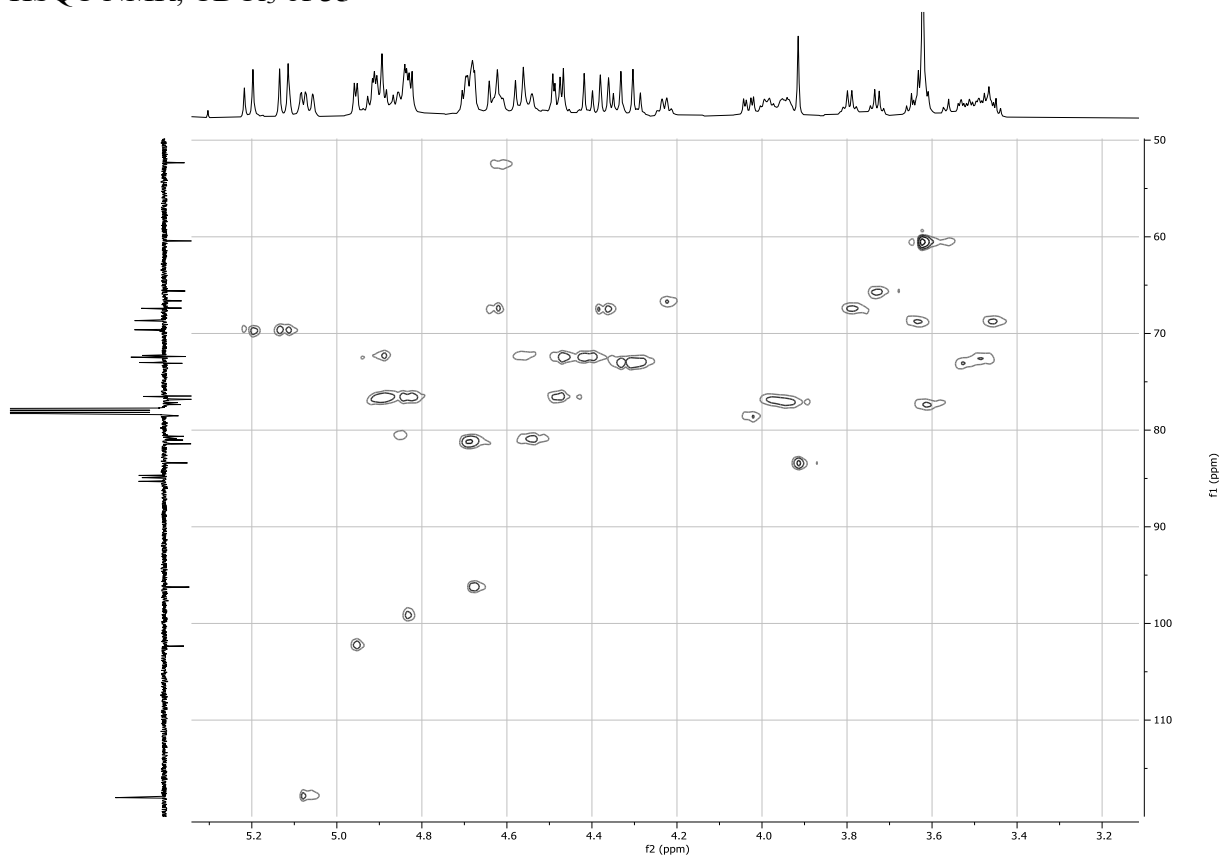

<sup>1</sup>H NMR, 850 MHz, D<sub>2</sub>O of **1**

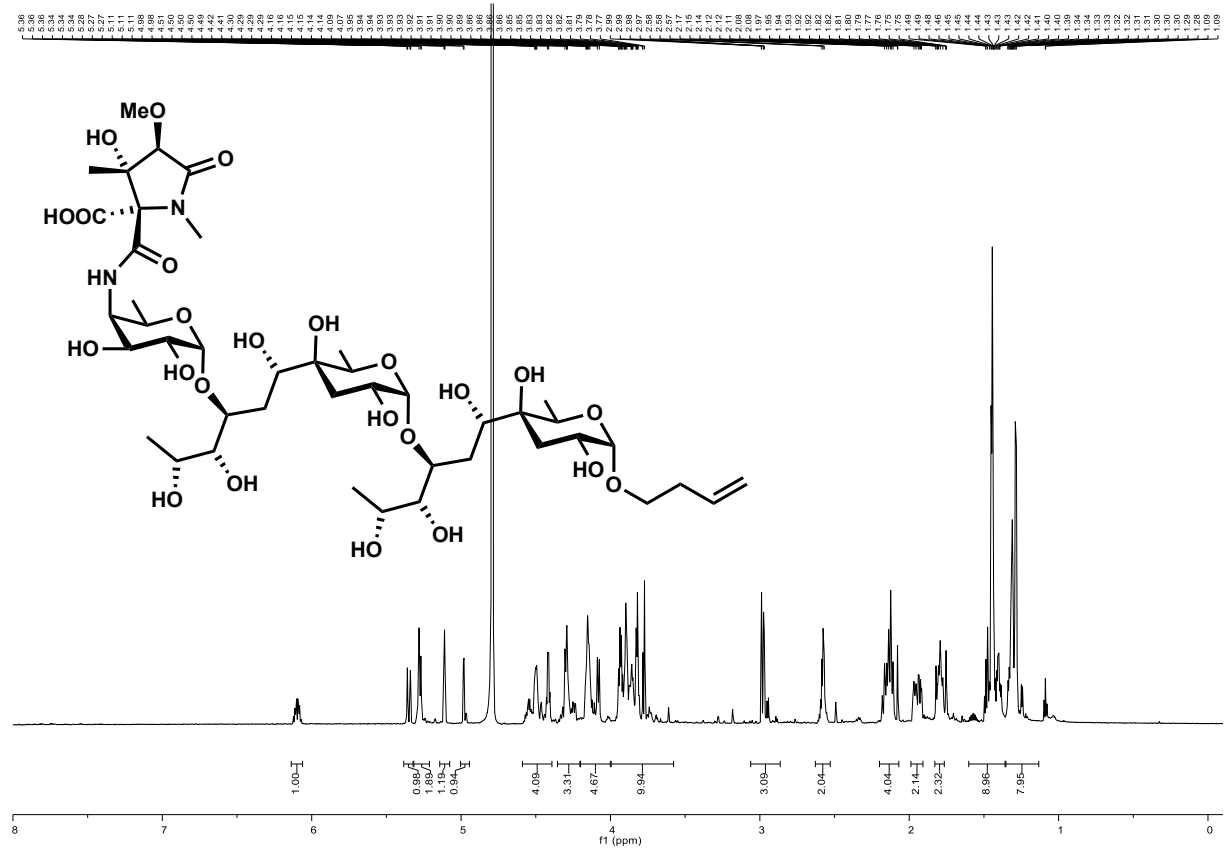

# <sup>13</sup>C NMR, 214 MHz, D<sub>2</sub>O of 1

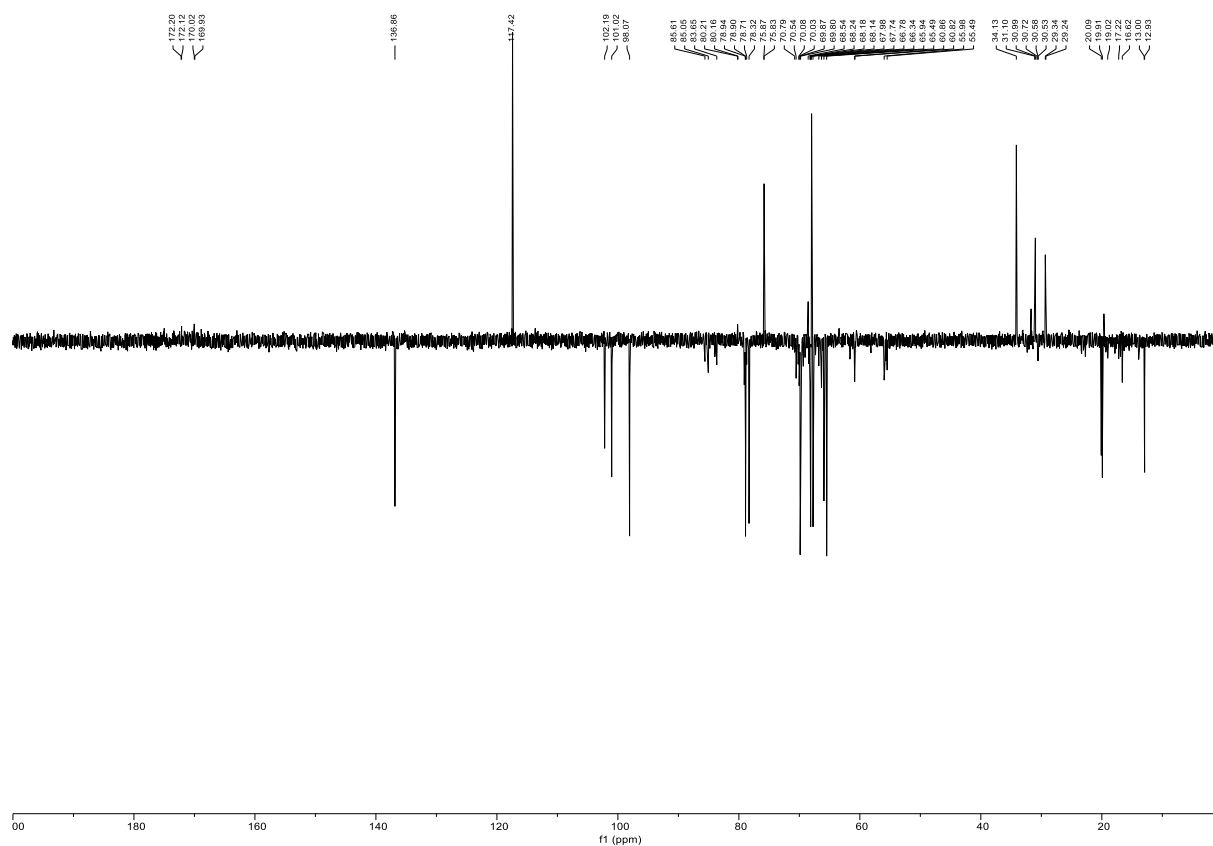

# HH-COSY NMR, D<sub>2</sub>O of 1

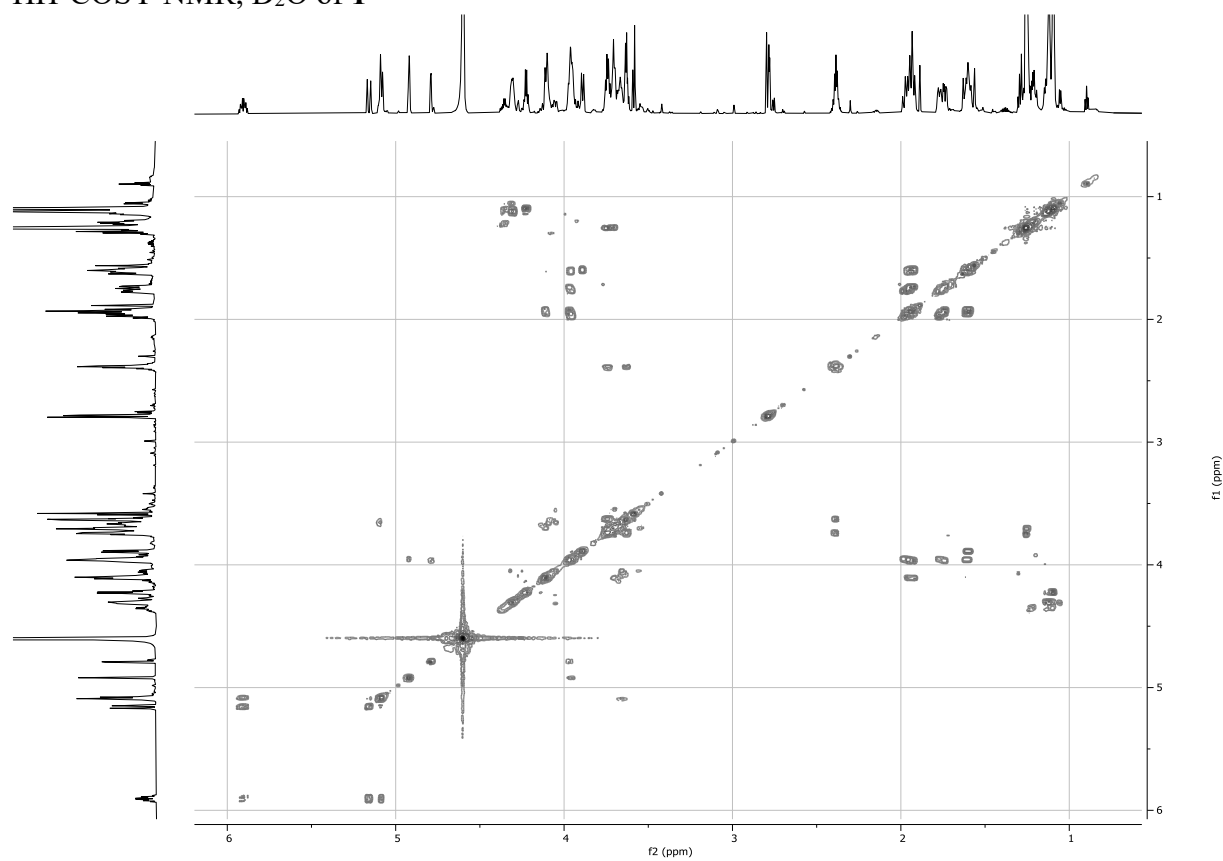

HSQC NMR, D<sub>2</sub>O of 1

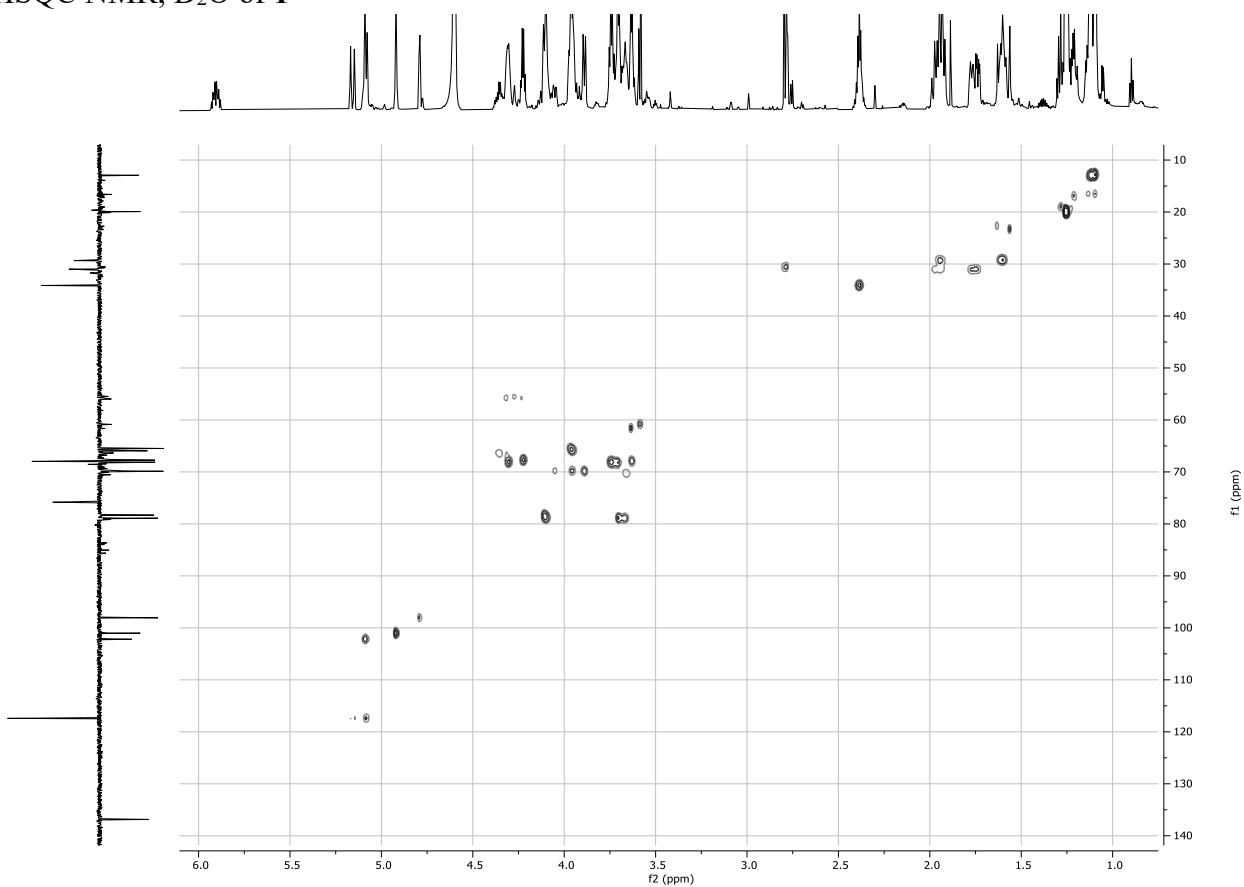

<sup>1</sup>H NMR, 400 MHz, CDCl<sub>3</sub> of S41

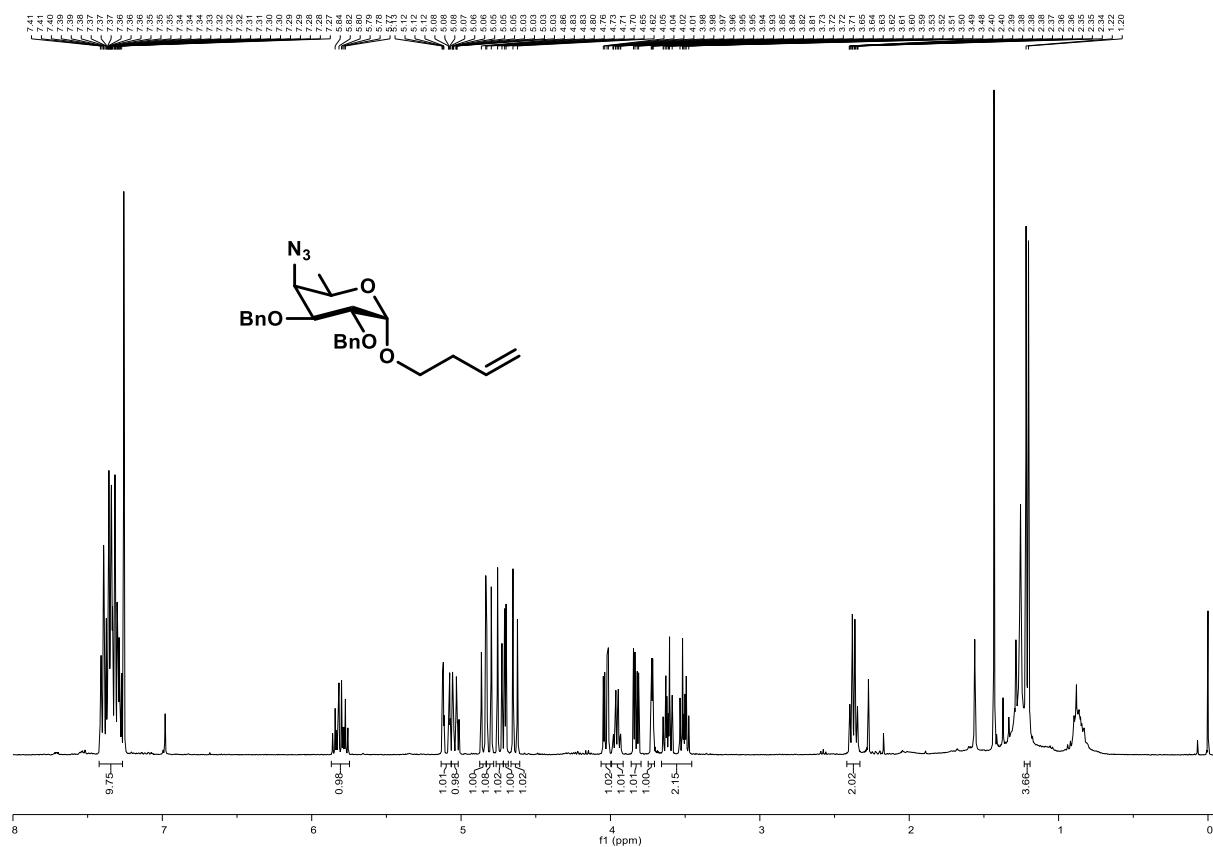



$^{13}\text{C}$  NMR, 101 MHz,  $\text{CDCl}_3$  of **S41**

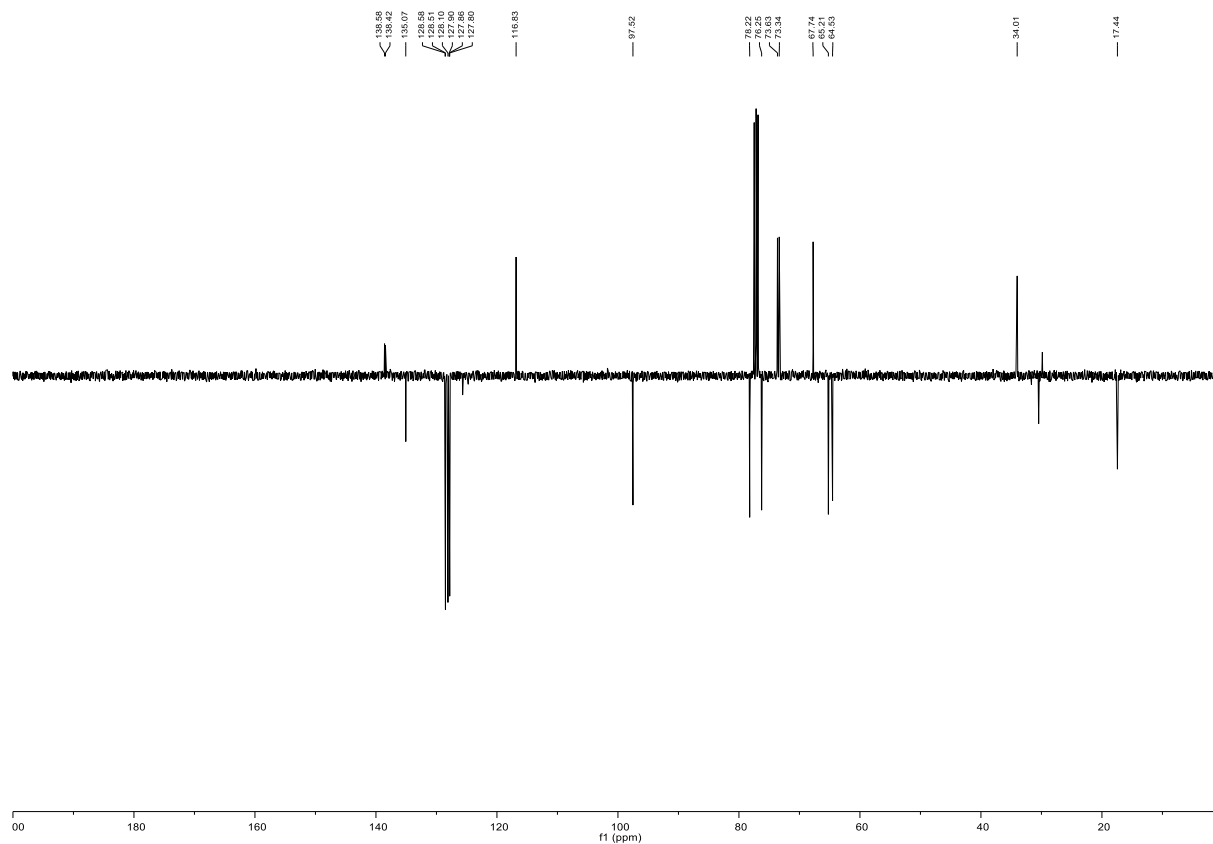

HH-COSY NMR,  $\text{CDCl}_3$  of **S41**

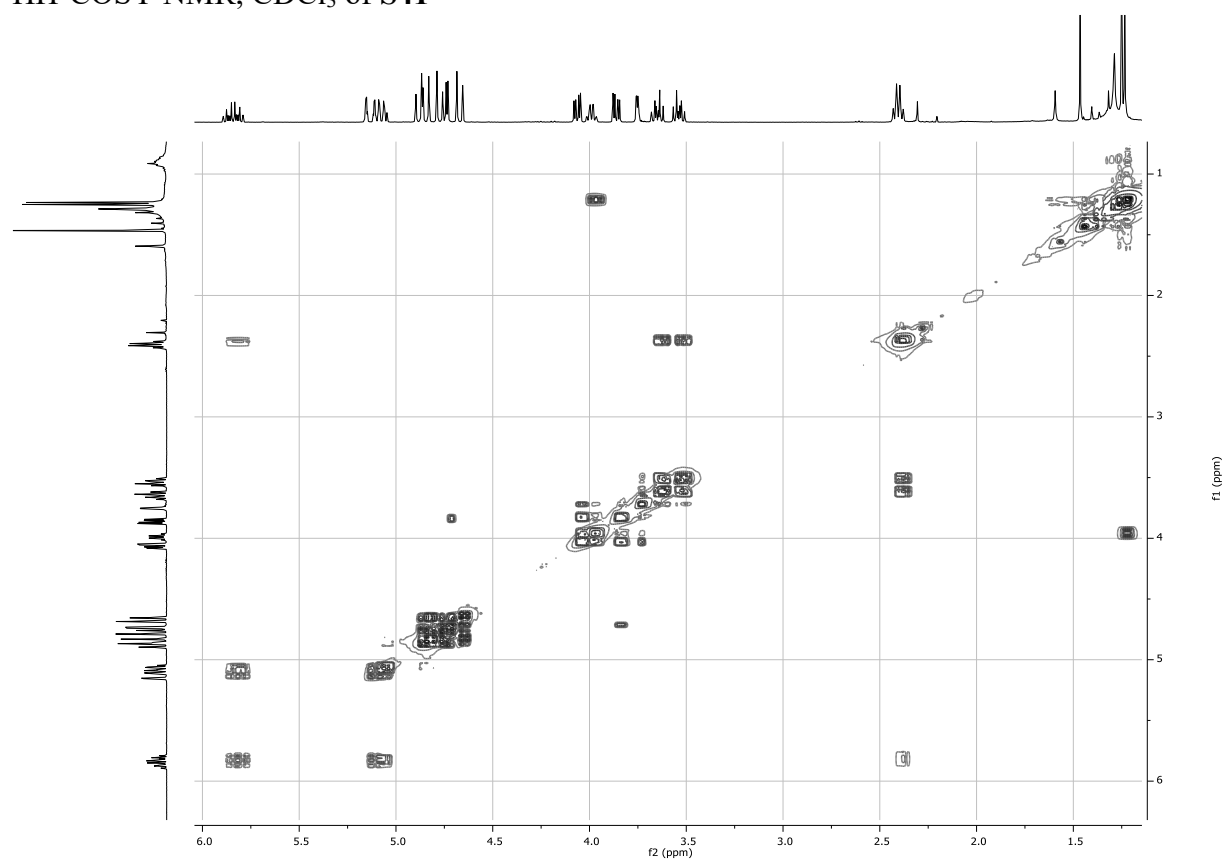

HSQC NMR, CDCl<sub>3</sub> of S41

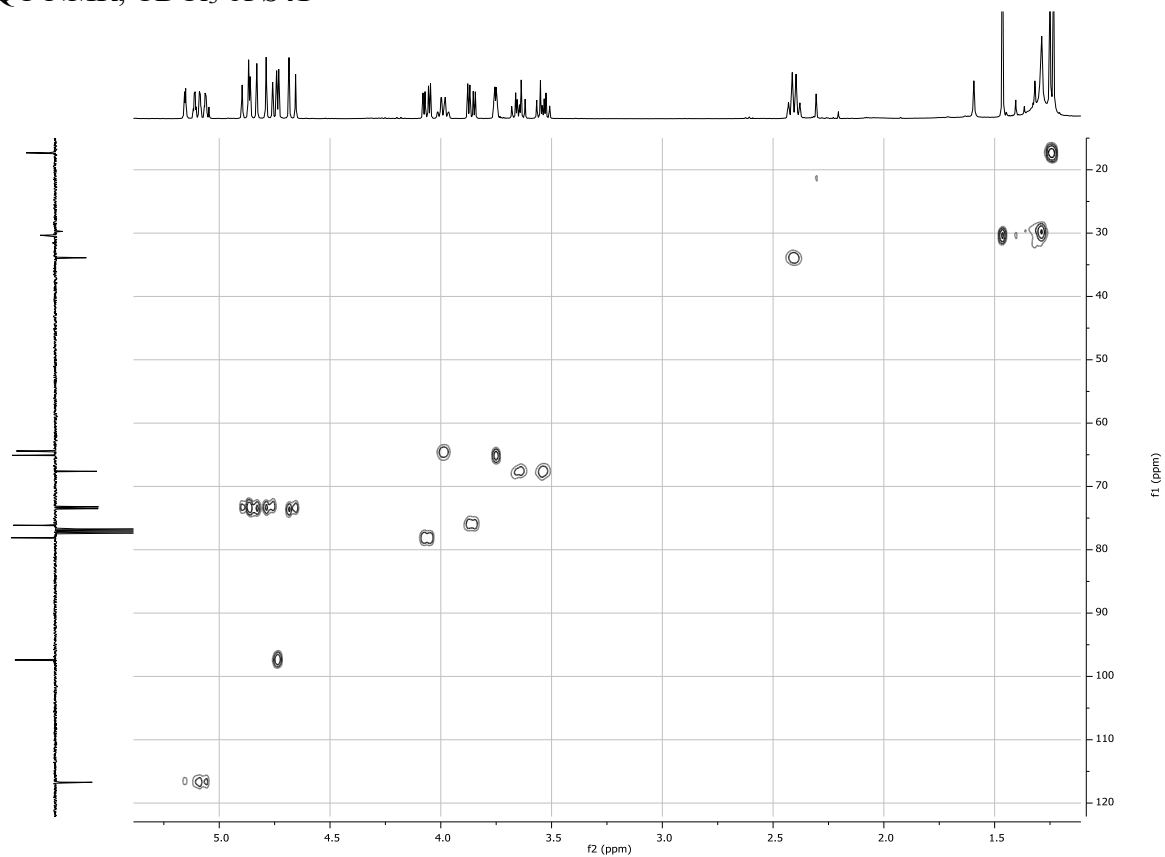

<sup>1</sup>H NMR, 400 MHz, CDCl<sub>3</sub> of S42

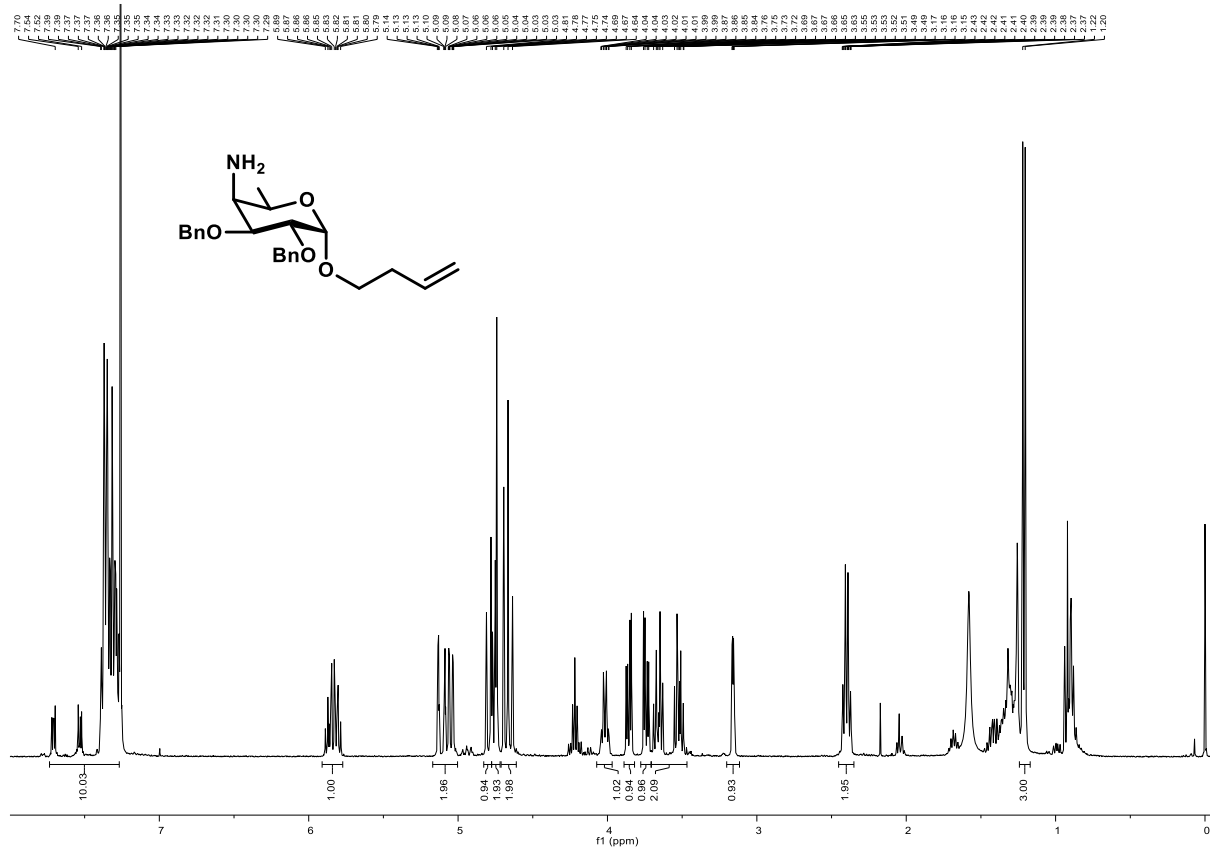

$^{13}\text{C}$  NMR, 101 MHz,  $\text{CDCl}_3$  of **S42**

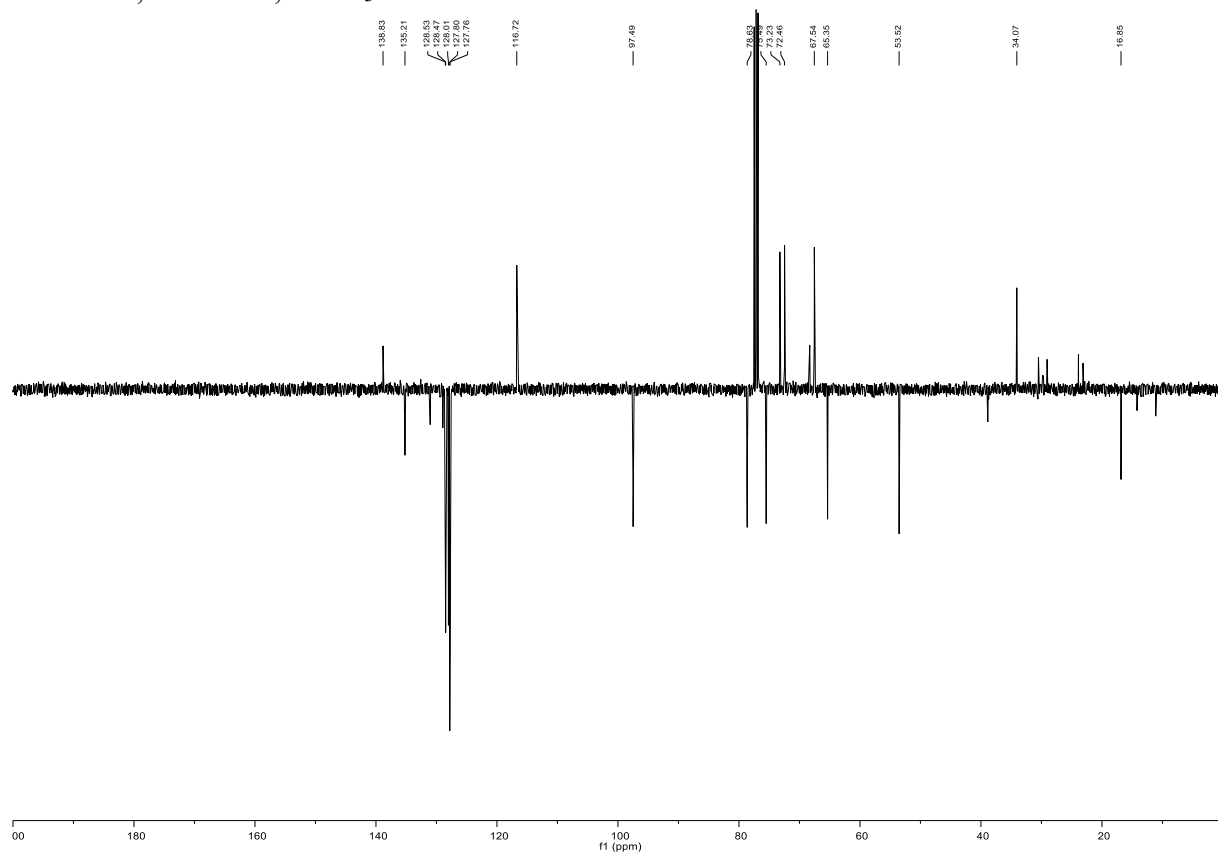

HH-COSY NMR,  $\text{CDCl}_3$  of **S42**

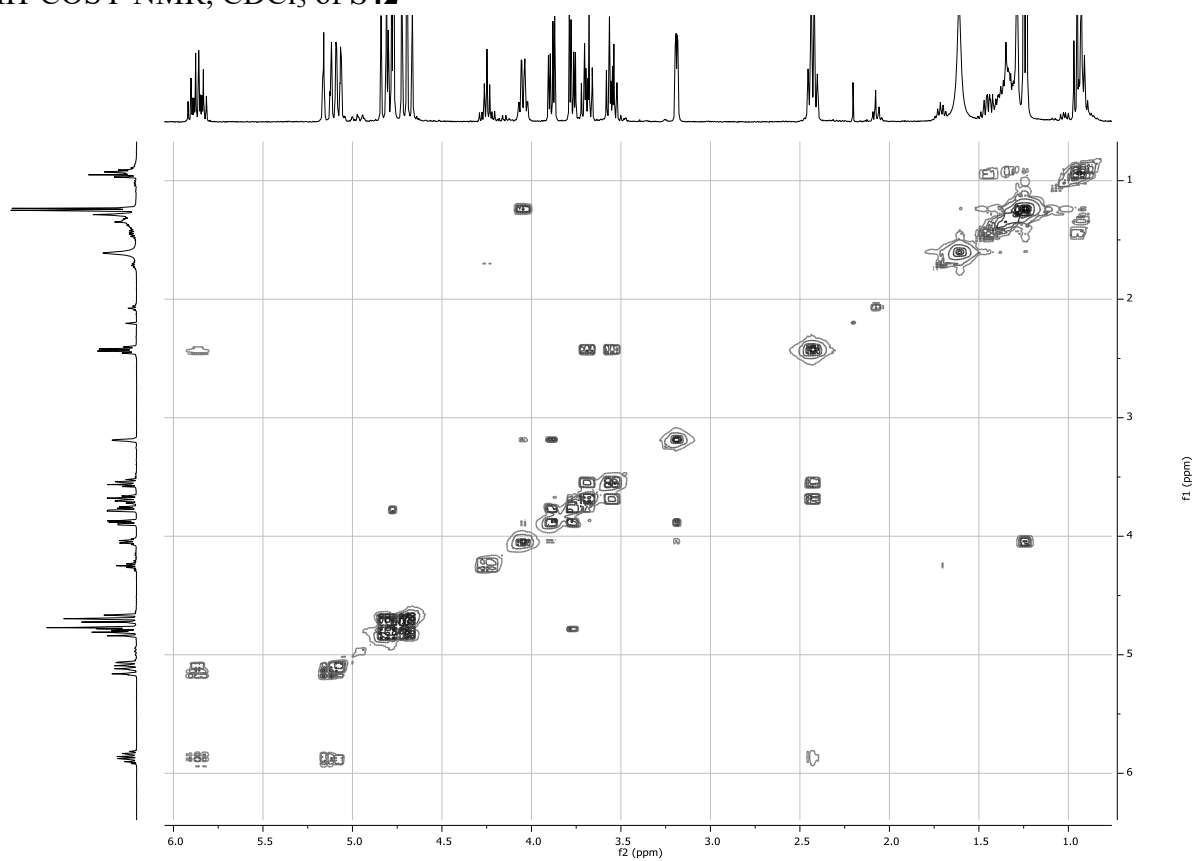

HSQC NMR, CDCl<sub>3</sub> of S42

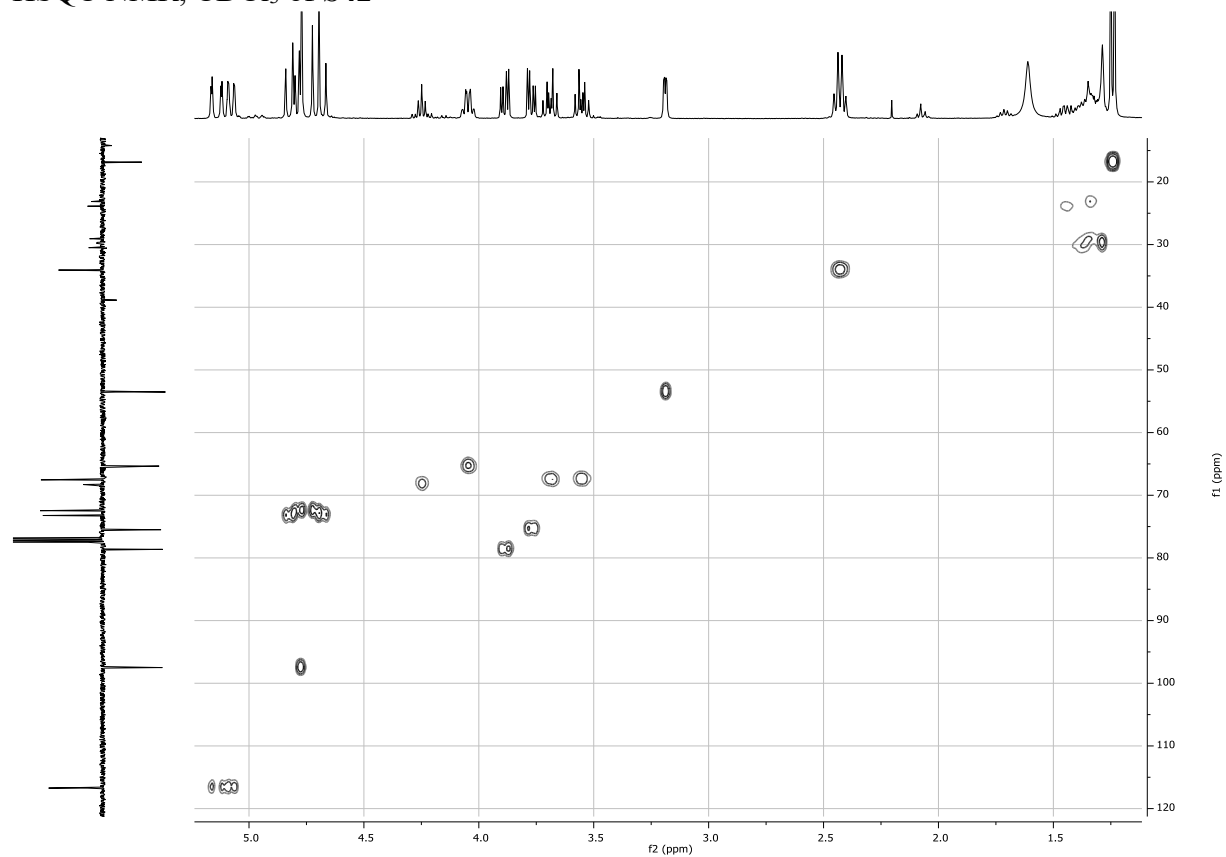

<sup>1</sup>H NMR, 400 MHz, CDCl<sub>3</sub> of S43

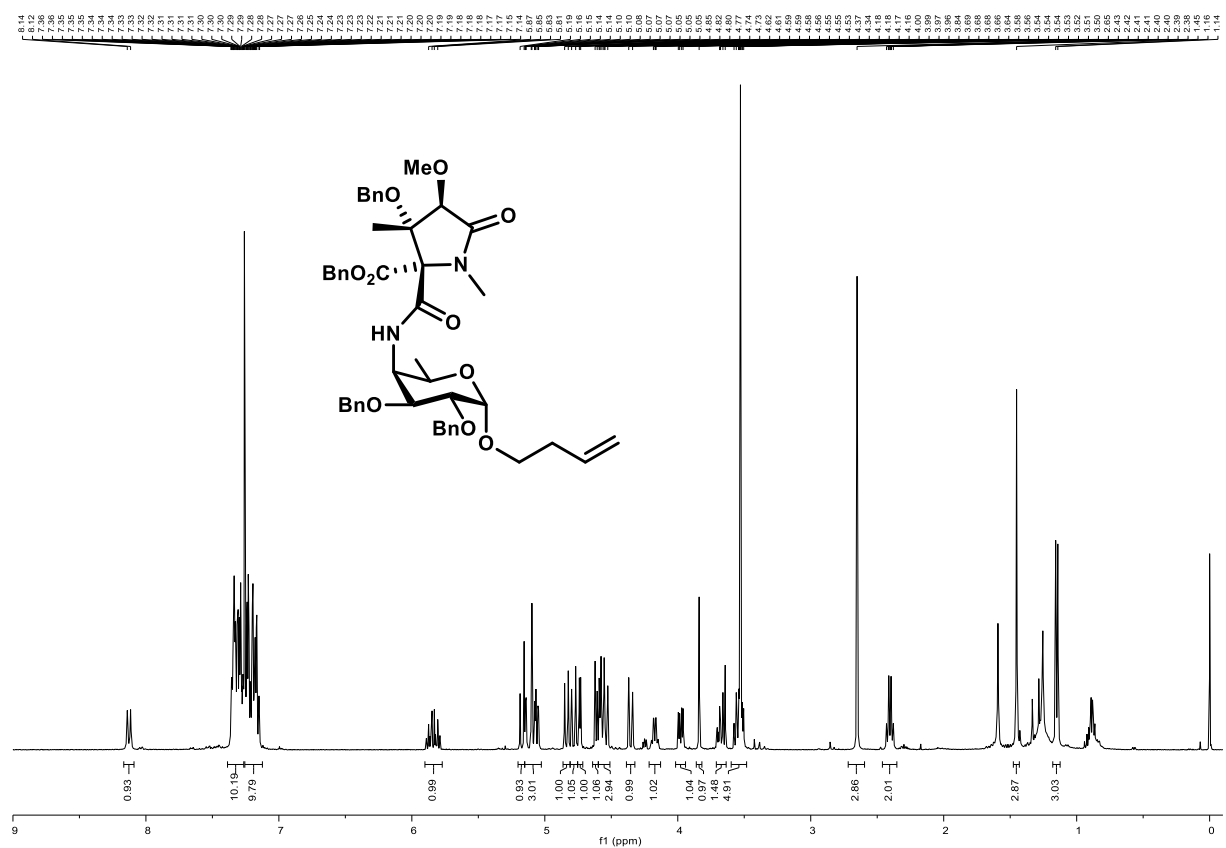

# <sup>13</sup>C NMR, 101 MHz, CDCl<sub>3</sub> of S43

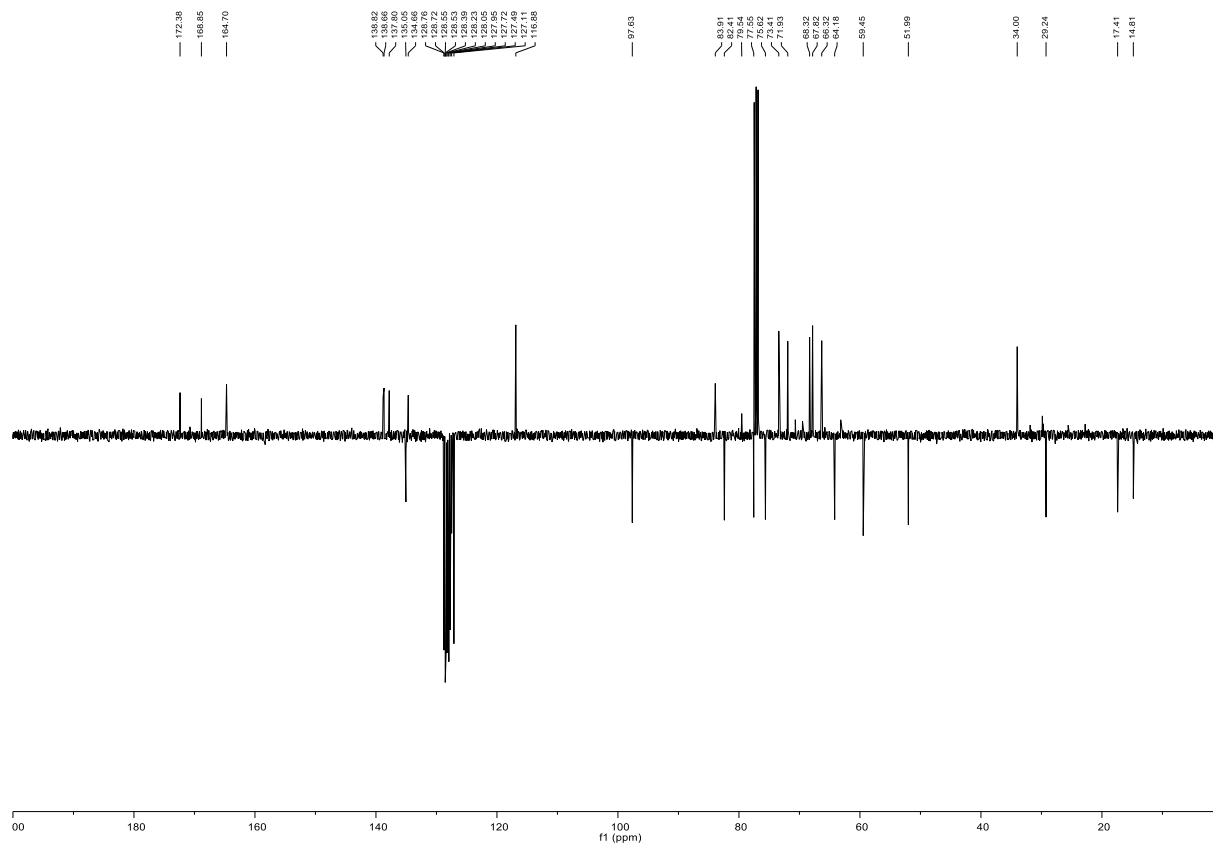

# HH-COSY NMR, CDCl<sub>3</sub> of S43

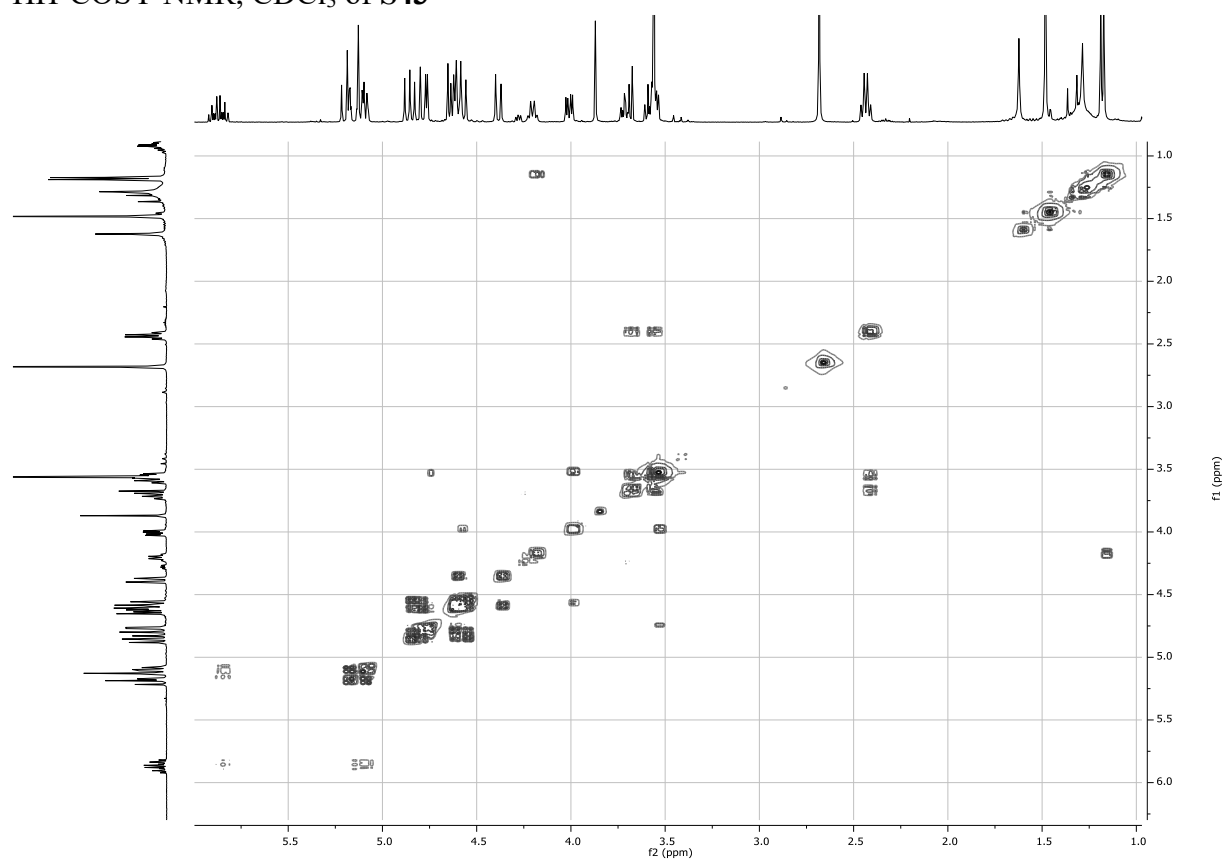

HSQC NMR, CDCl<sub>3</sub> of S43

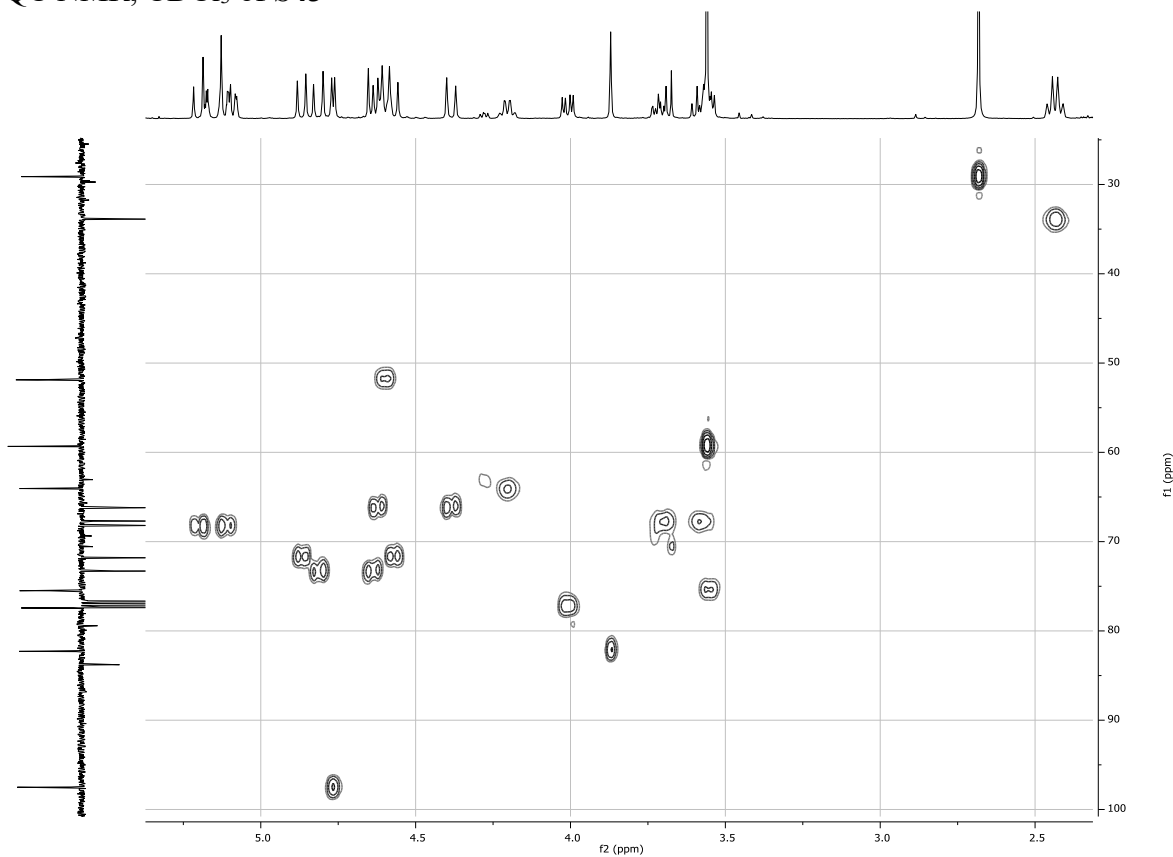

<sup>1</sup>H NMR, 500 MHz, D<sub>2</sub>O of 36

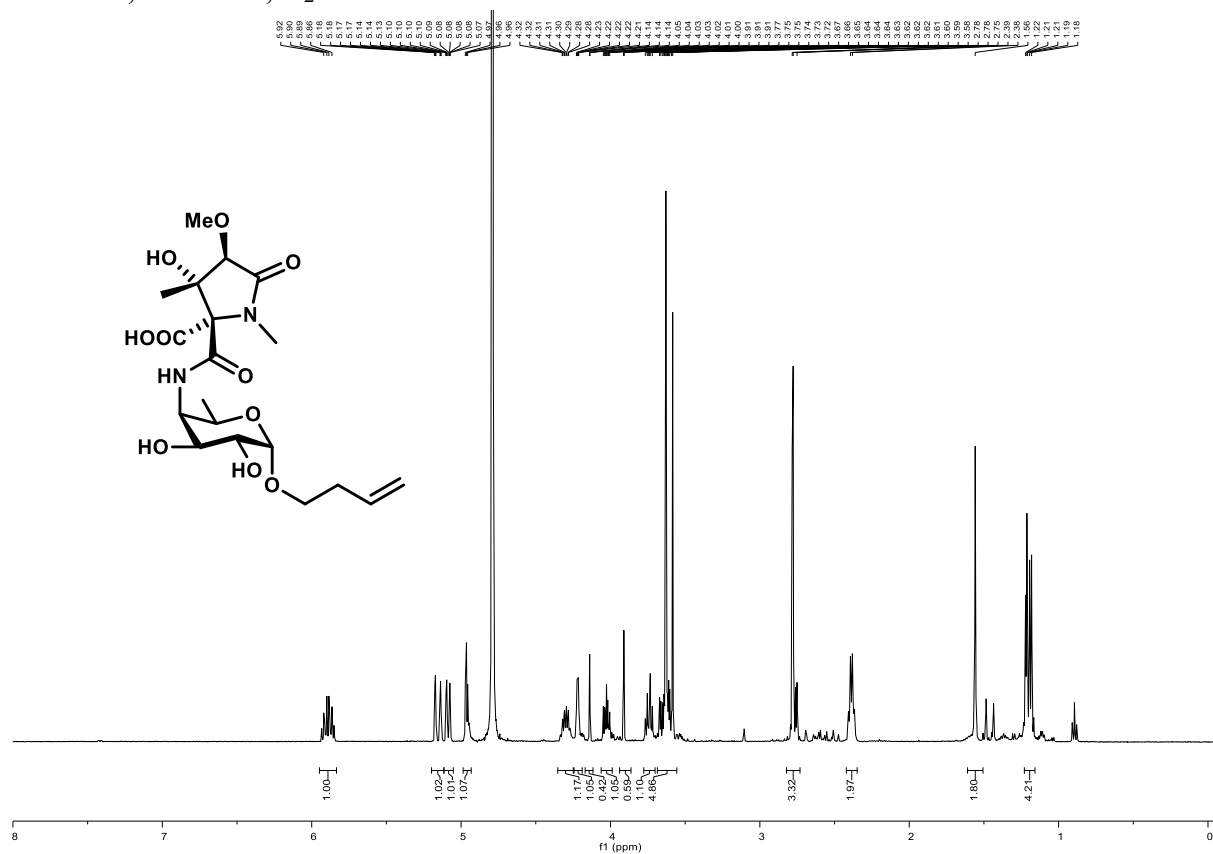

<sup>13</sup>C NMR, 126 MHz, D<sub>2</sub>O of **36**

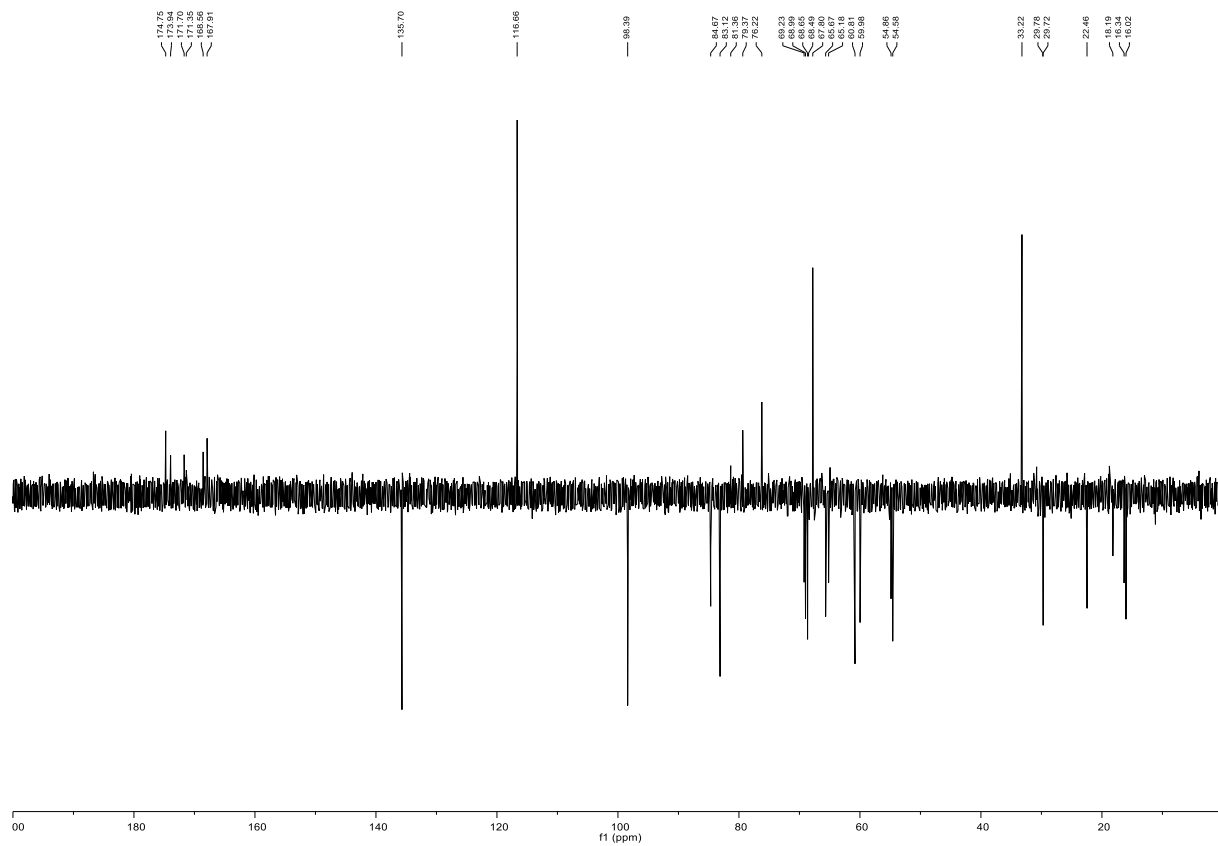

HH-COSY NMR, D<sub>2</sub>O of **36**

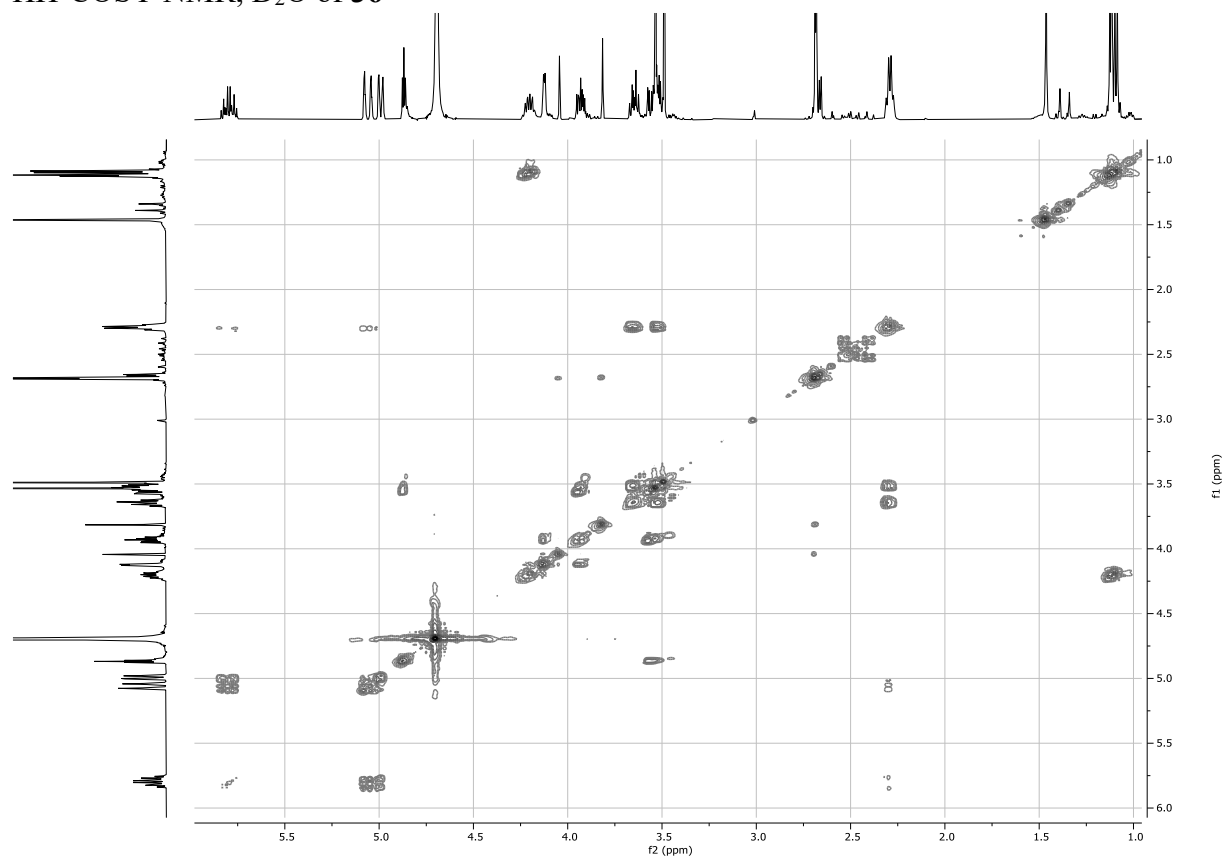

HSQC NMR, D<sub>2</sub>O of **36**

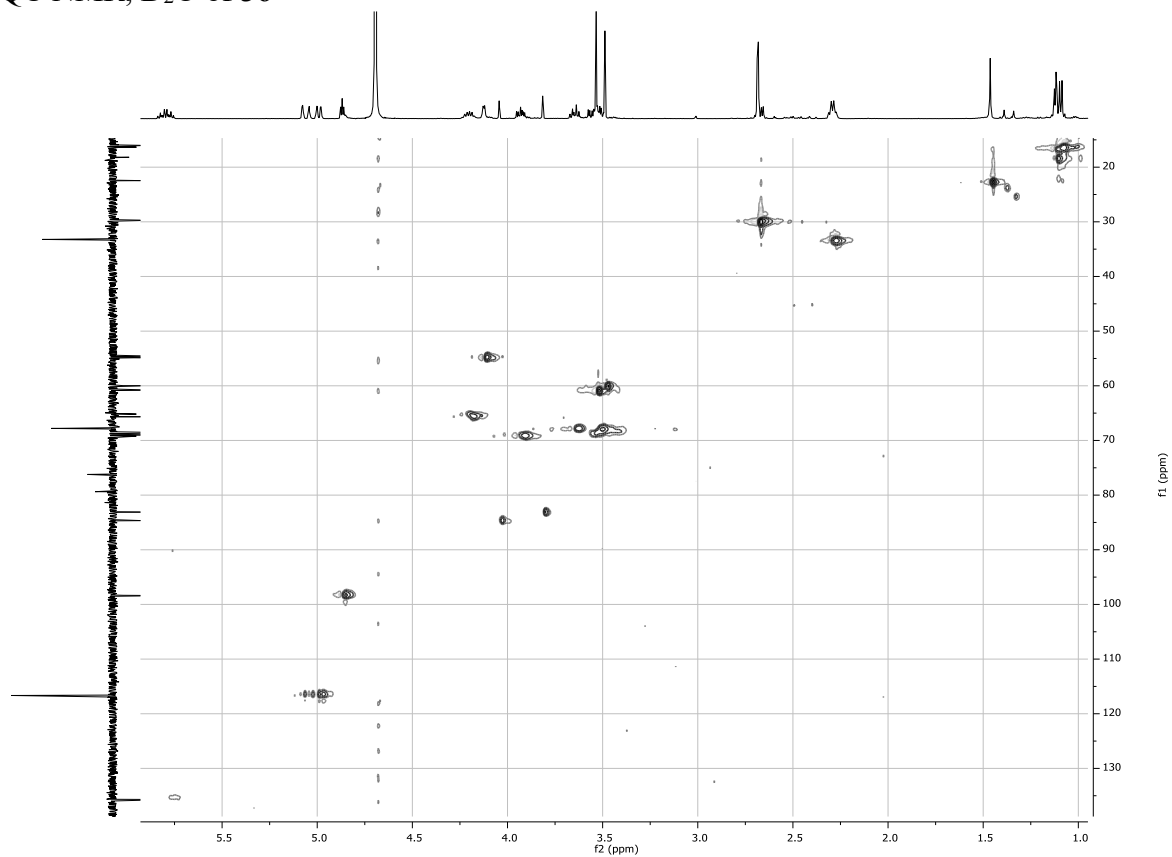

<sup>1</sup>H NMR, 850 MHz, D<sub>2</sub>O of **S44**

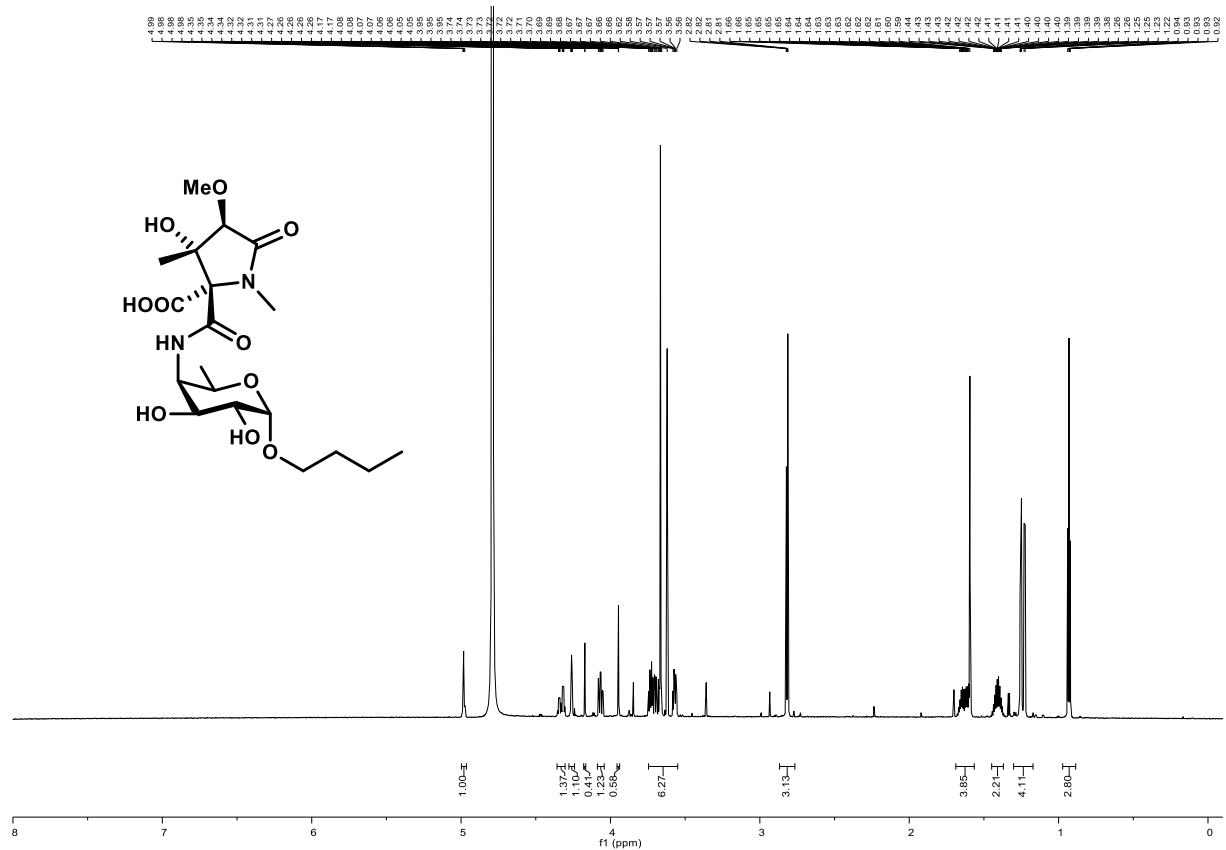



# <sup>13</sup>C NMR, 214 MHz, D<sub>2</sub>O of S44

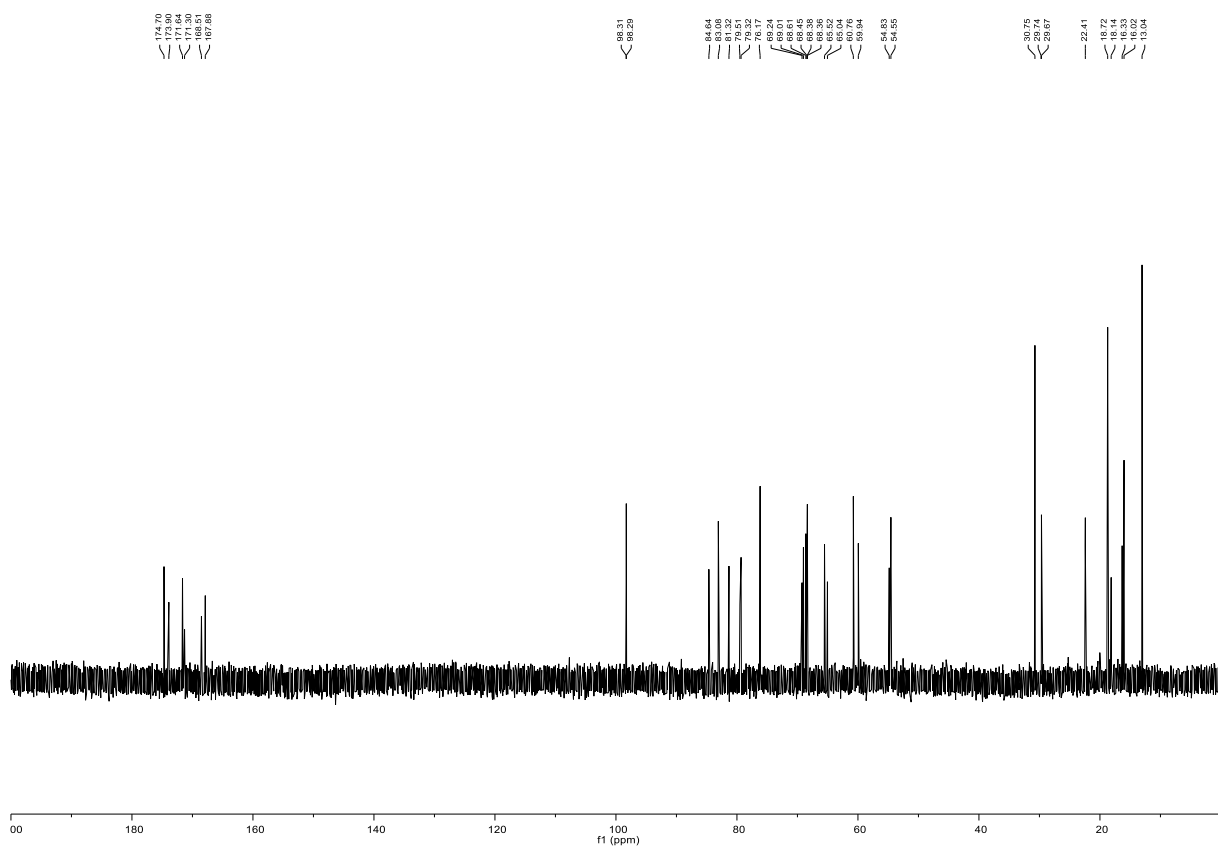

# HH-COSY NMR, D<sub>2</sub>O of S44

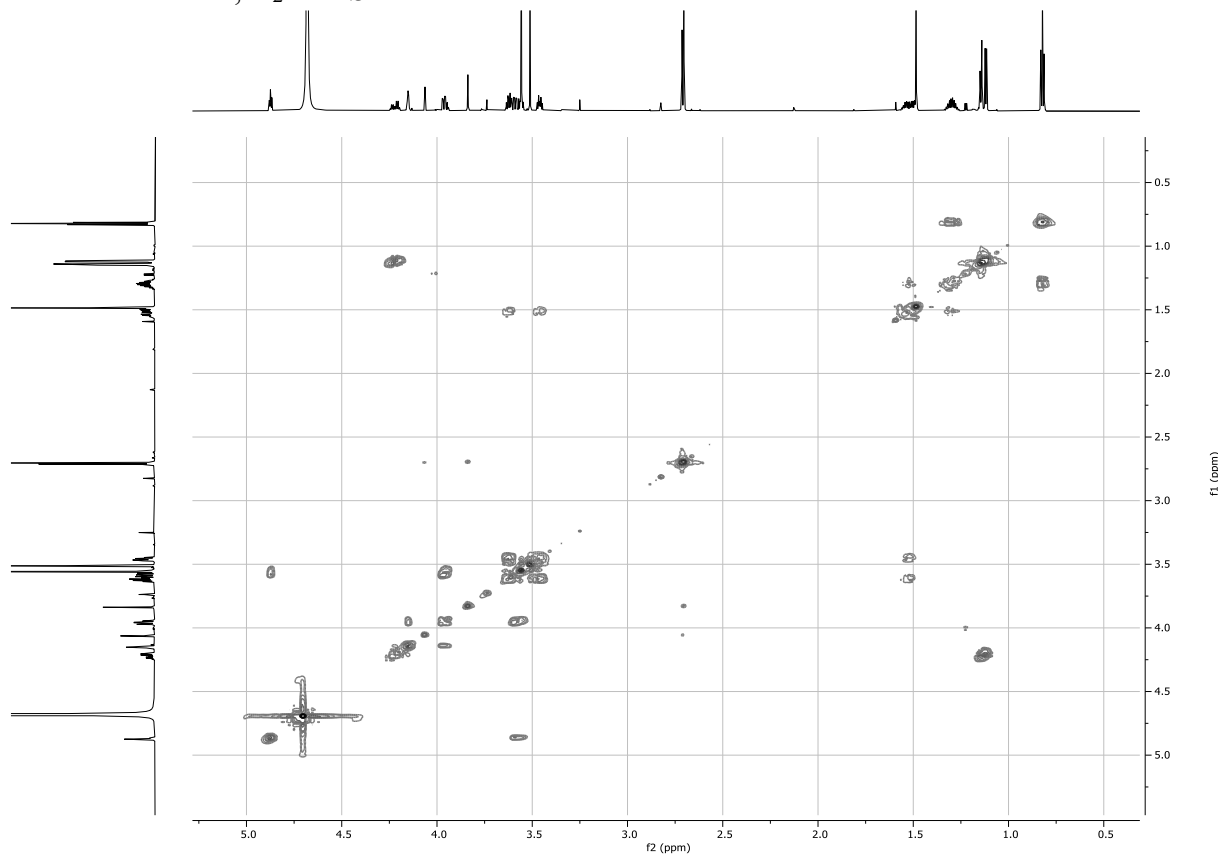

HSQC NMR, D<sub>2</sub>O of S44

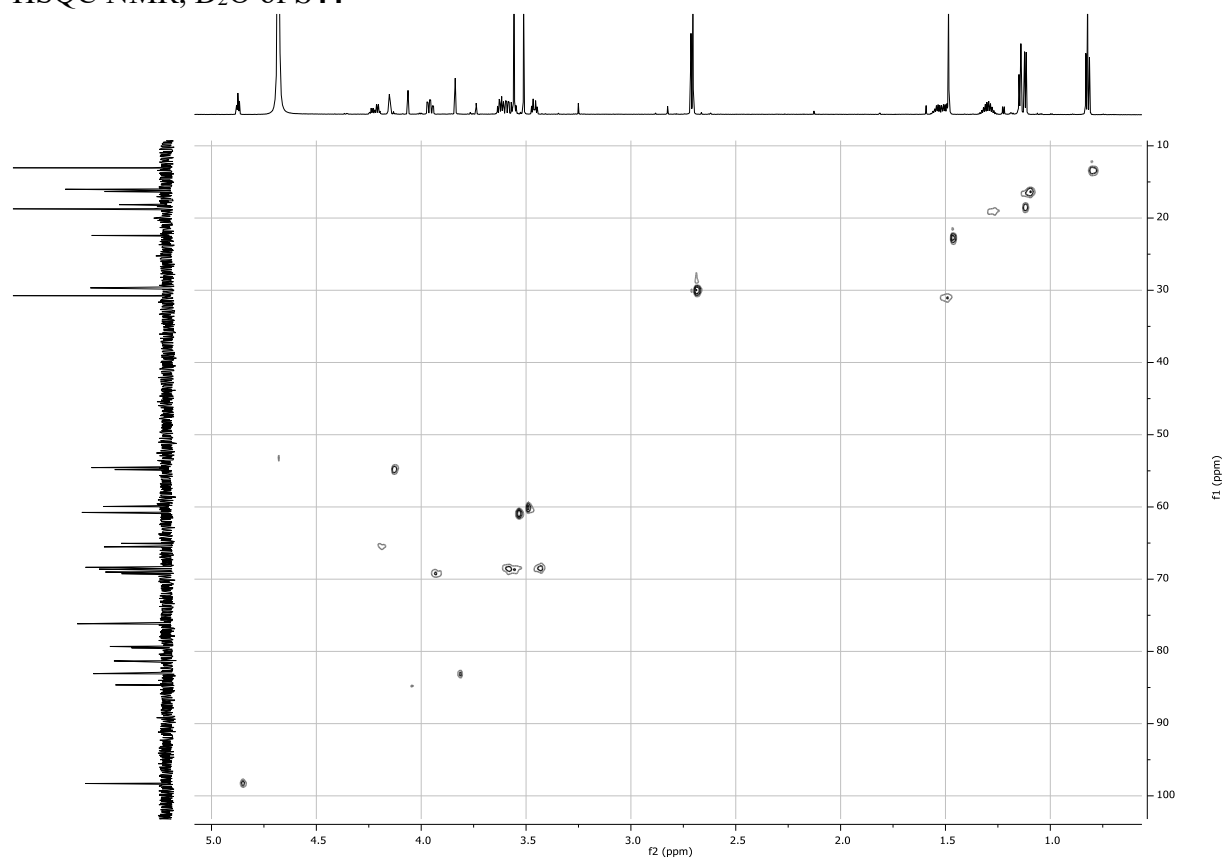

<sup>1</sup>H NMR, 500 MHz, D<sub>2</sub>O of 37

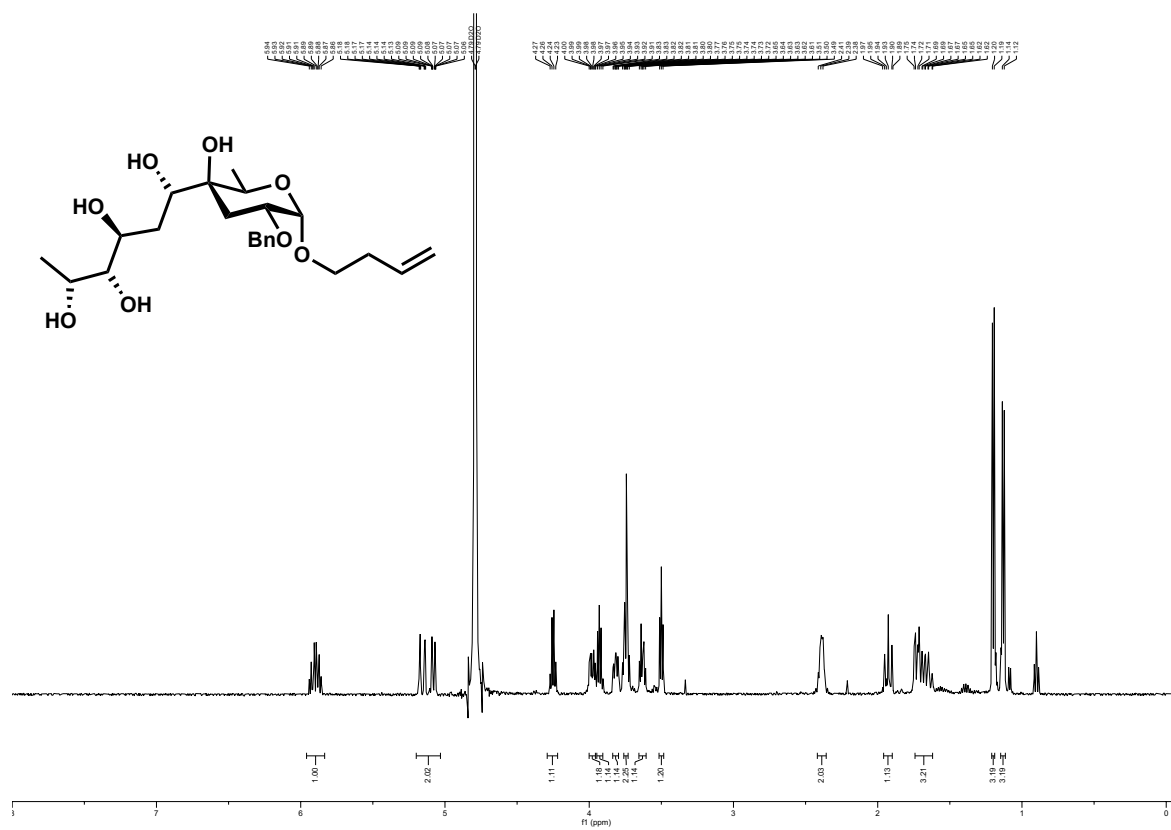

$^{13}\text{C}$  NMR, 126 MHz,  $\text{D}_2\text{O}$  of **37**

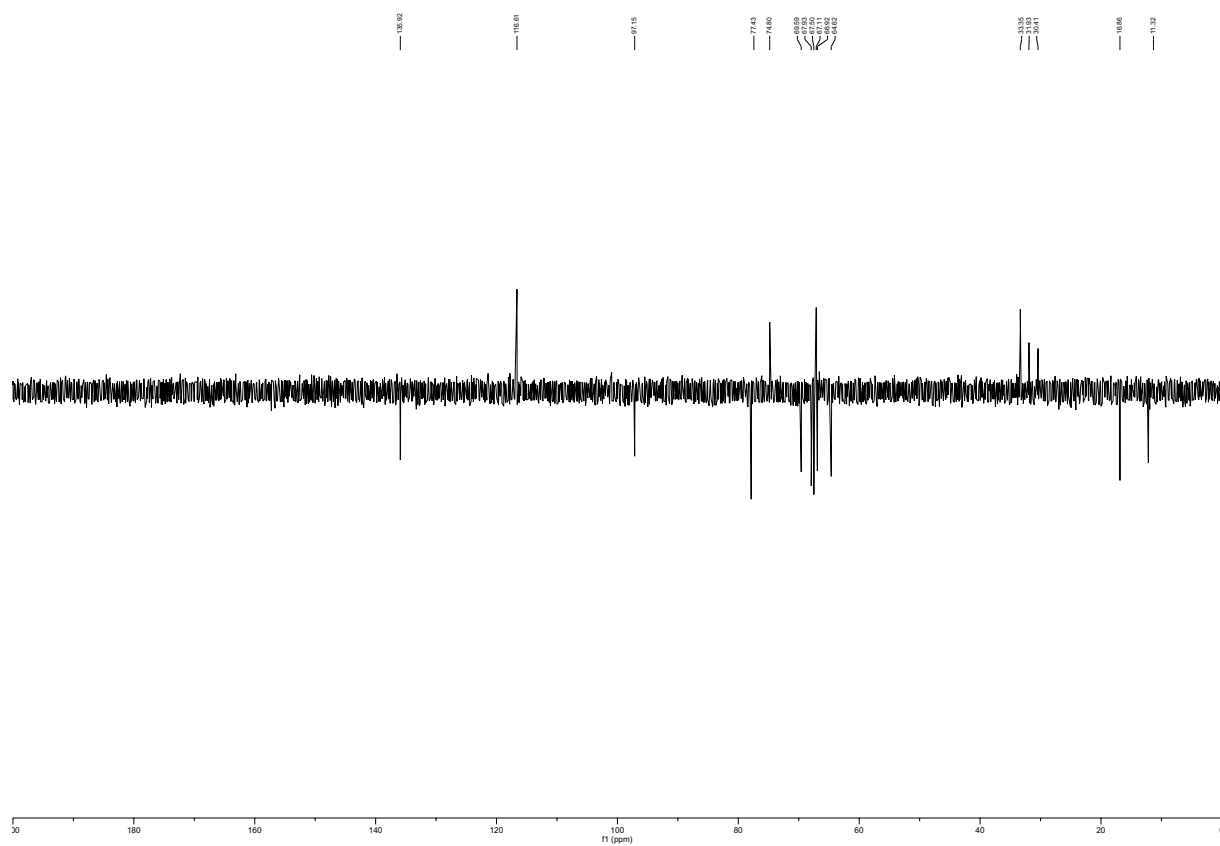

HH-COSY NMR,  $\text{D}_2\text{O}$  of **S37**

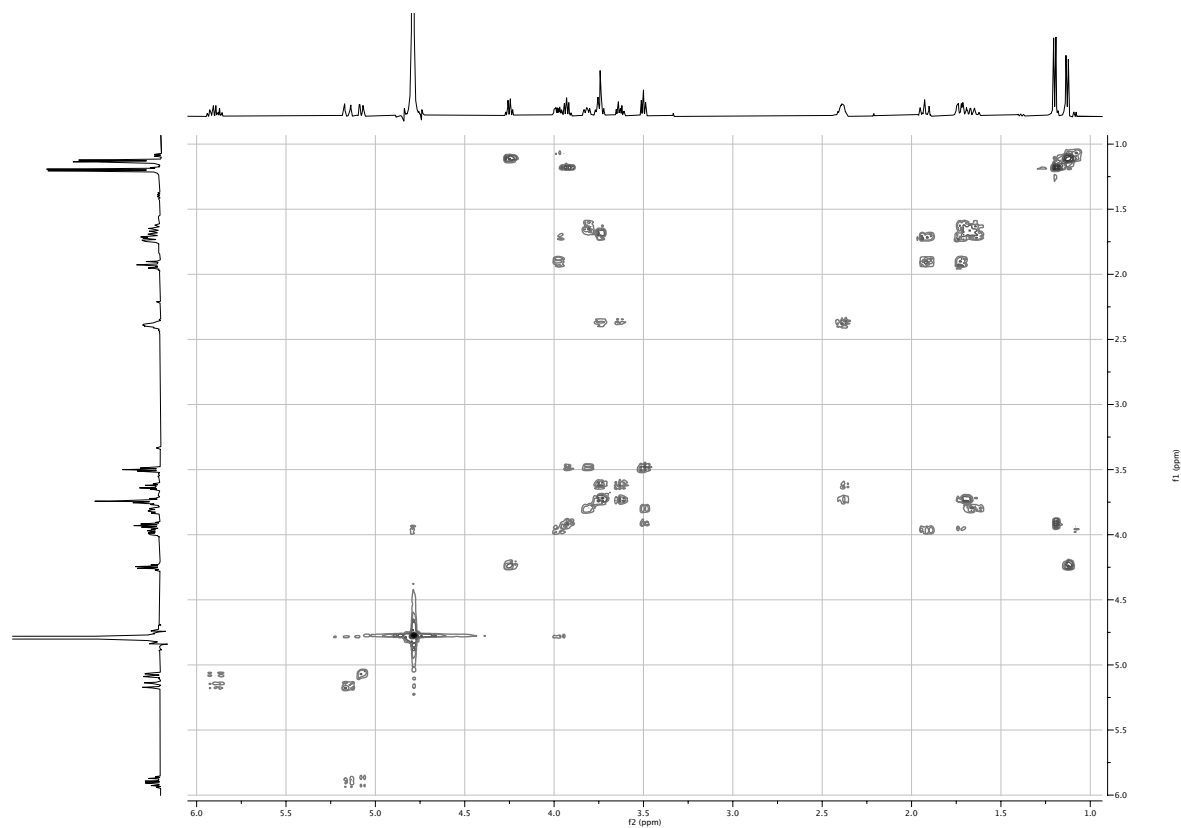

HSQC NMR,  $\text{D}_2\text{O}$  of **S37**

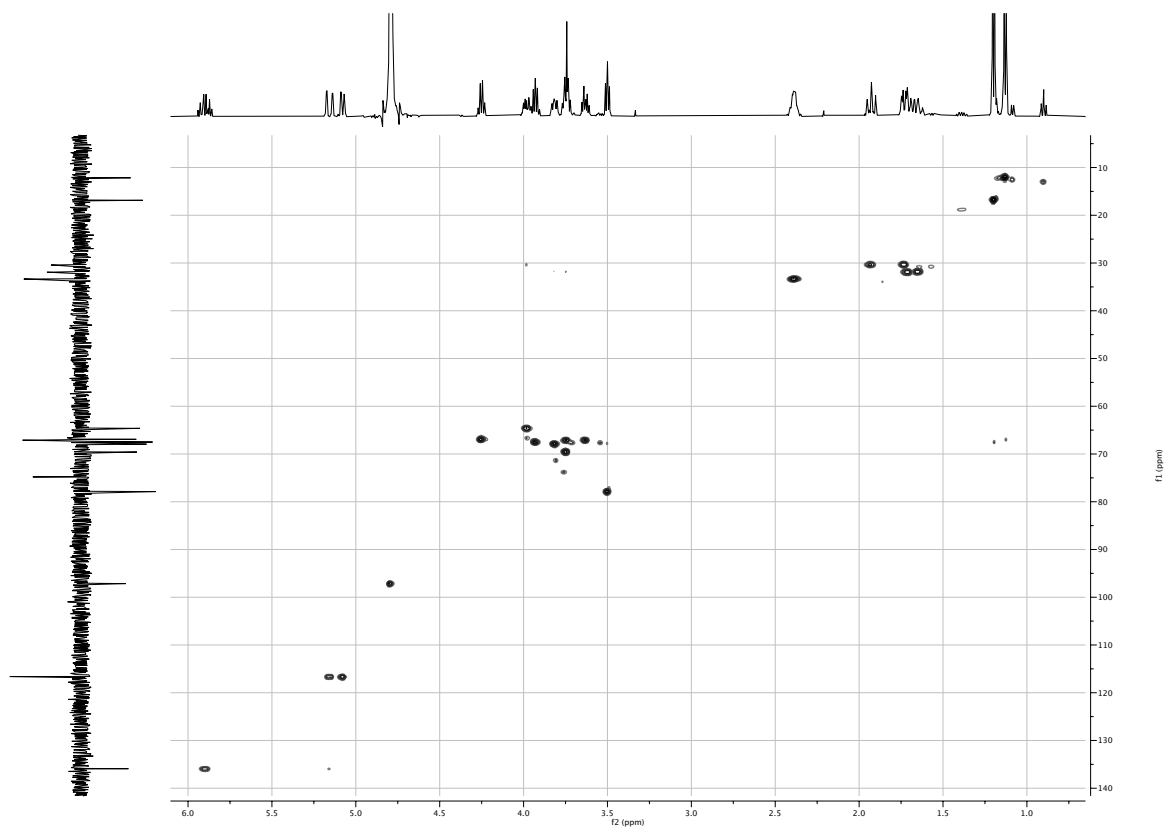

$^1\text{H}$  NMR, 500 MHz,  $\text{CDCl}_3$  of S45

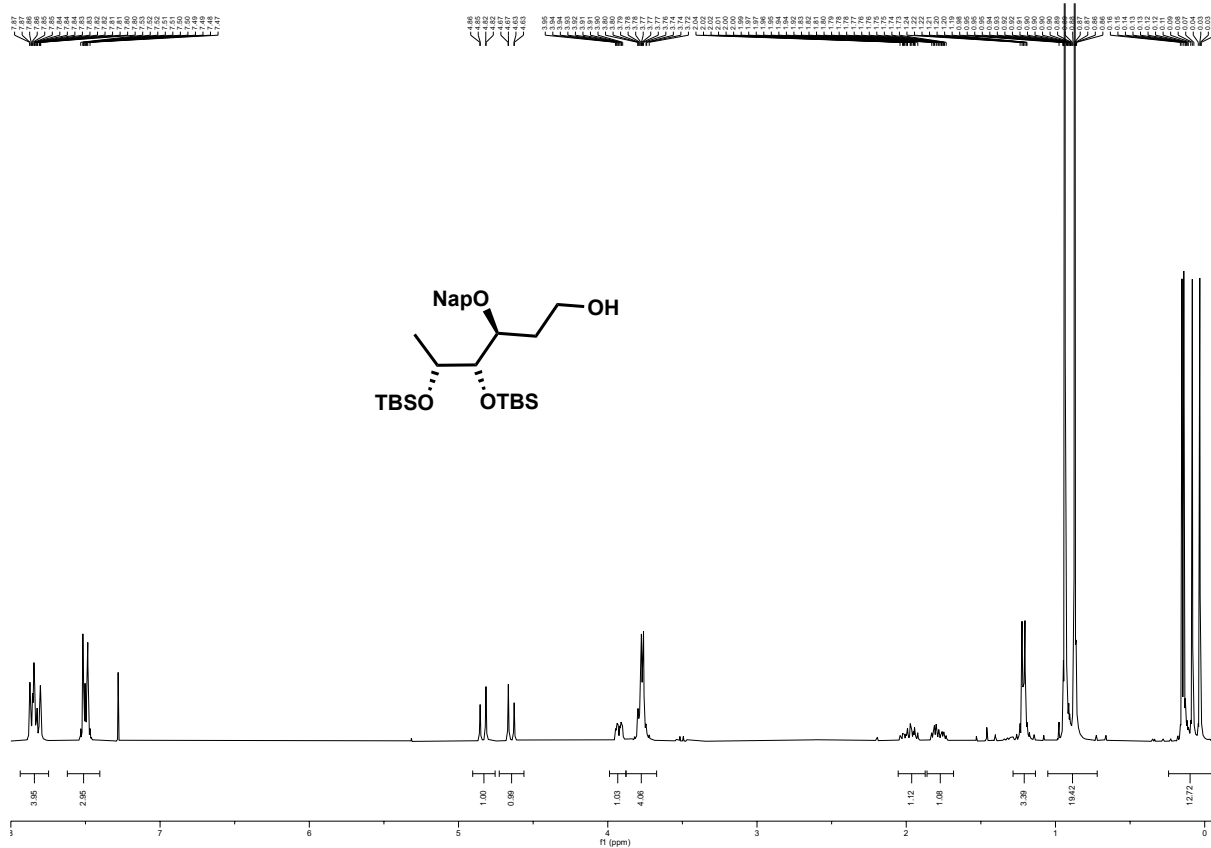



HSQC NMR,  $\text{CDCl}_3$  of **S45**

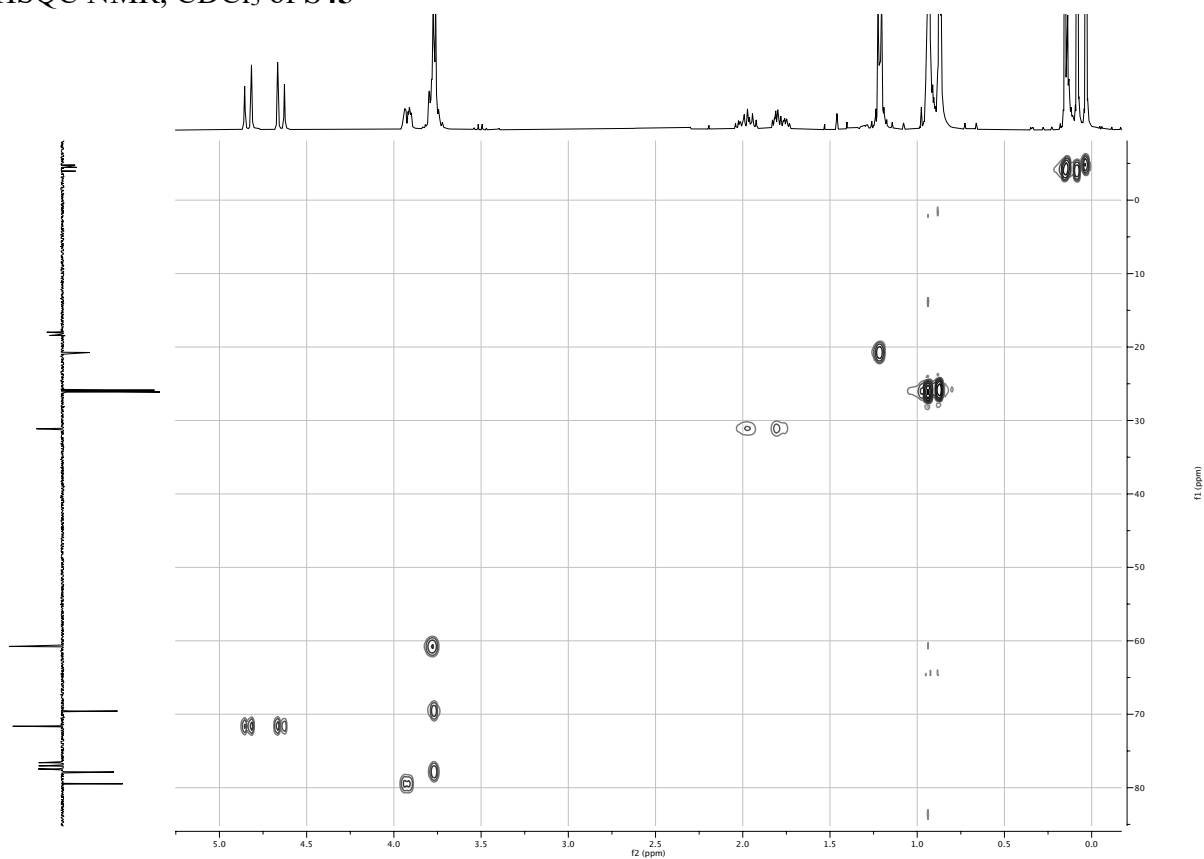

$^1\text{H}$  NMR, 500 MHz,  $\text{CDCl}_3$  of **S46**

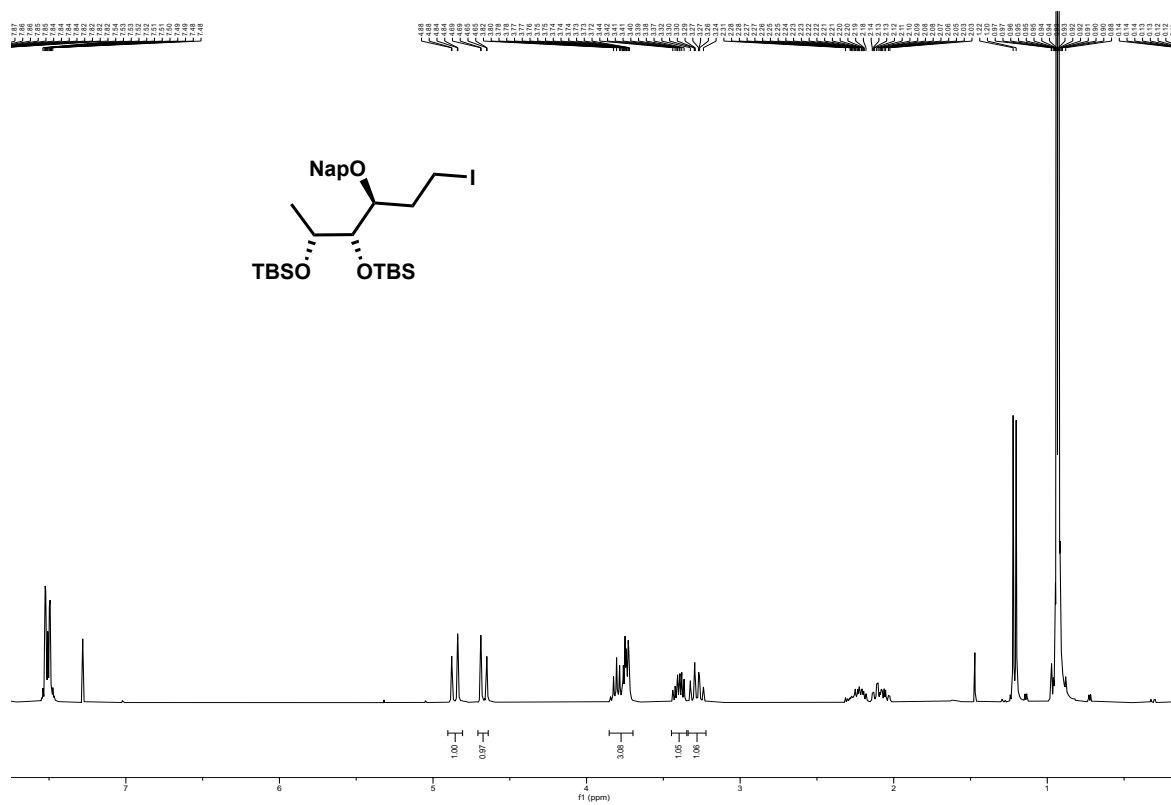

$^{13}\text{C}$  NMR, 126 MHz,  $\text{CDCl}_3$  of **S46**

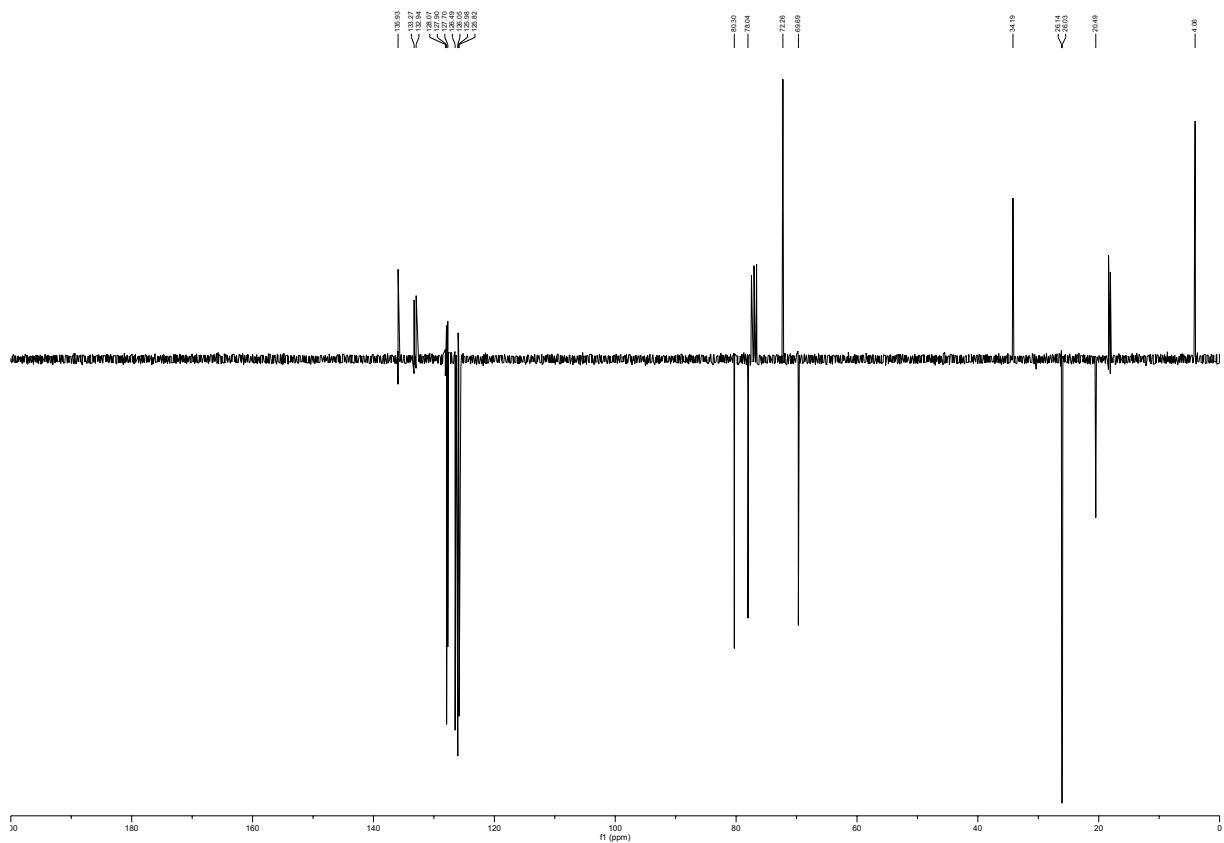

HH-COSY NMR,  $\text{CDCl}_3$  of **S46**

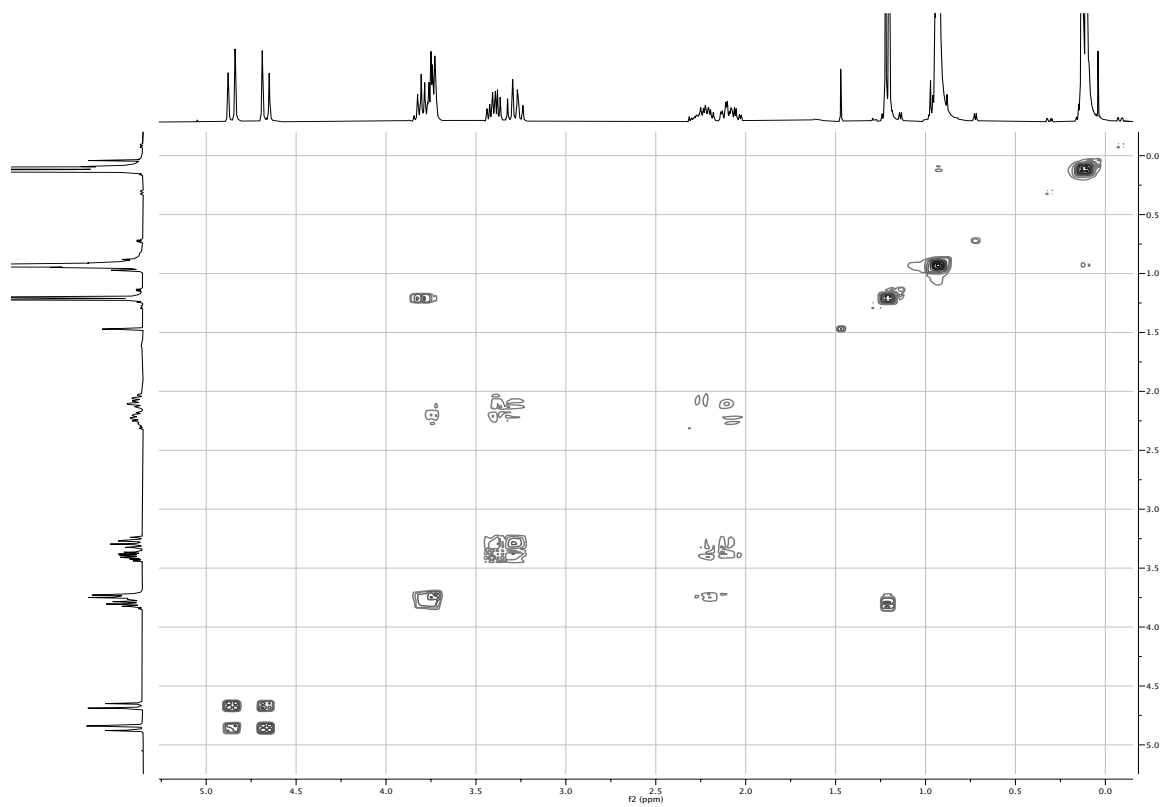

HSQC NMR, CDCl<sub>3</sub> of **S46**

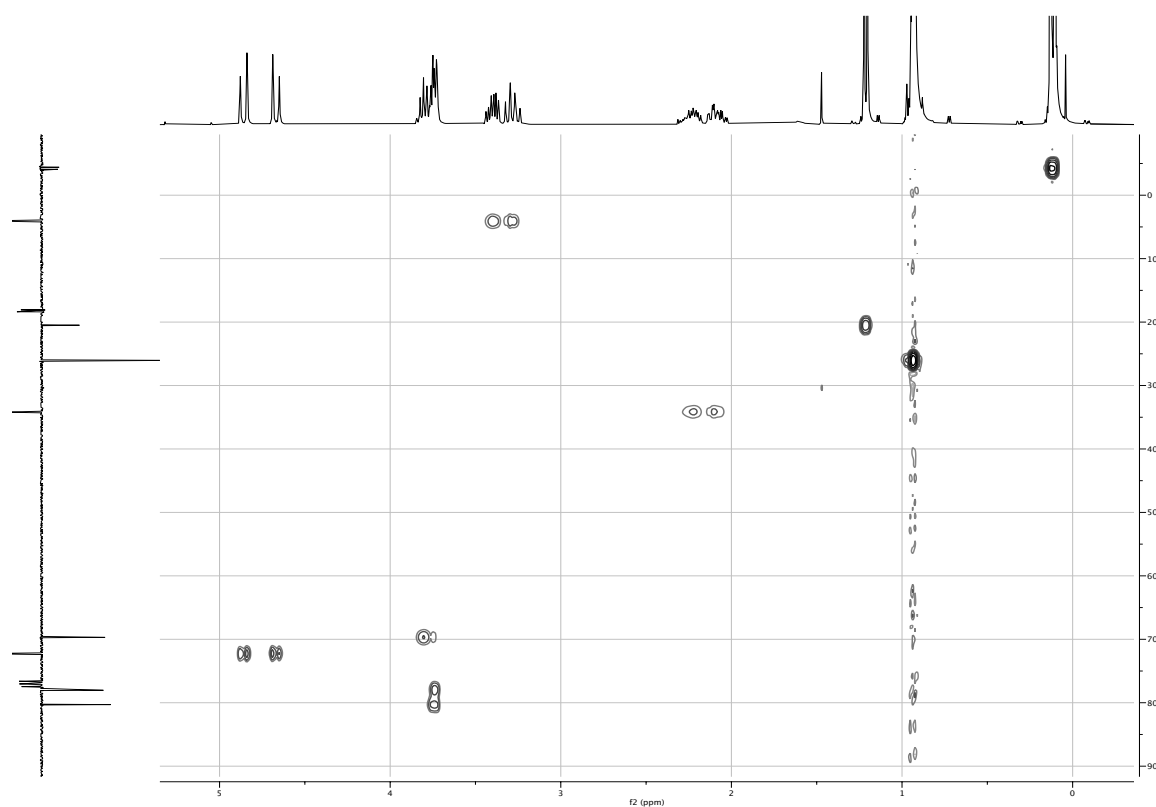

<sup>1</sup>H NMR, 500 MHz, CDCl<sub>3</sub> of **S47**

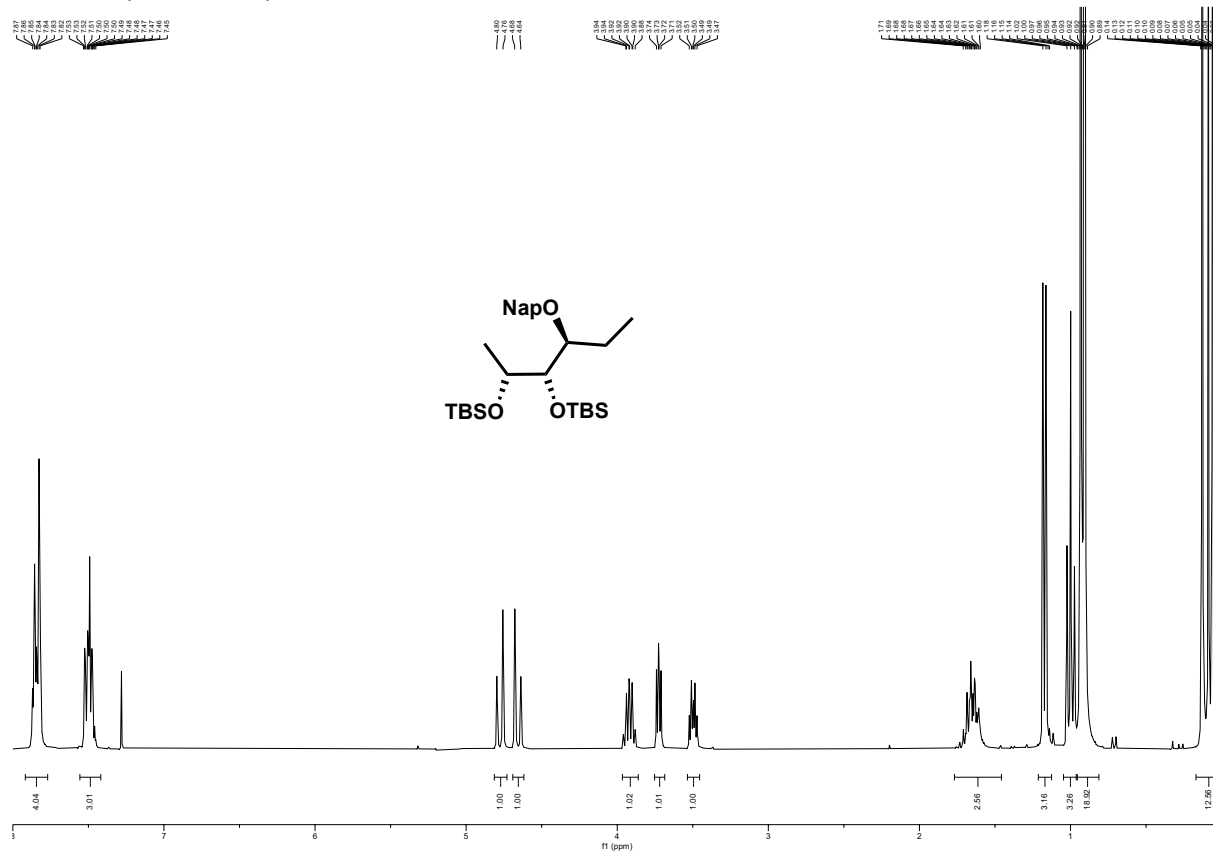





HSQC NMR, CDCl<sub>3</sub> of **S47**

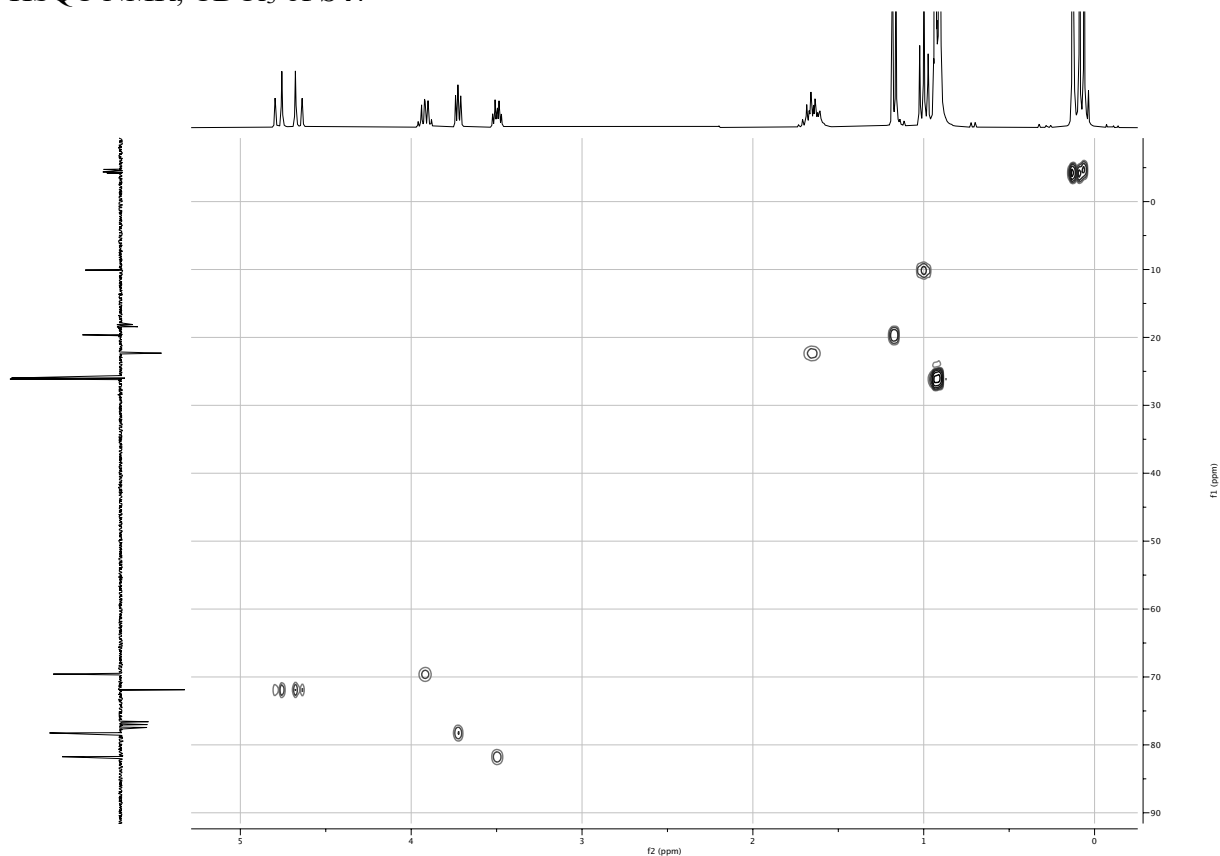

<sup>1</sup>H NMR, 500 MHz, DCI<sub>3</sub> of **S48**

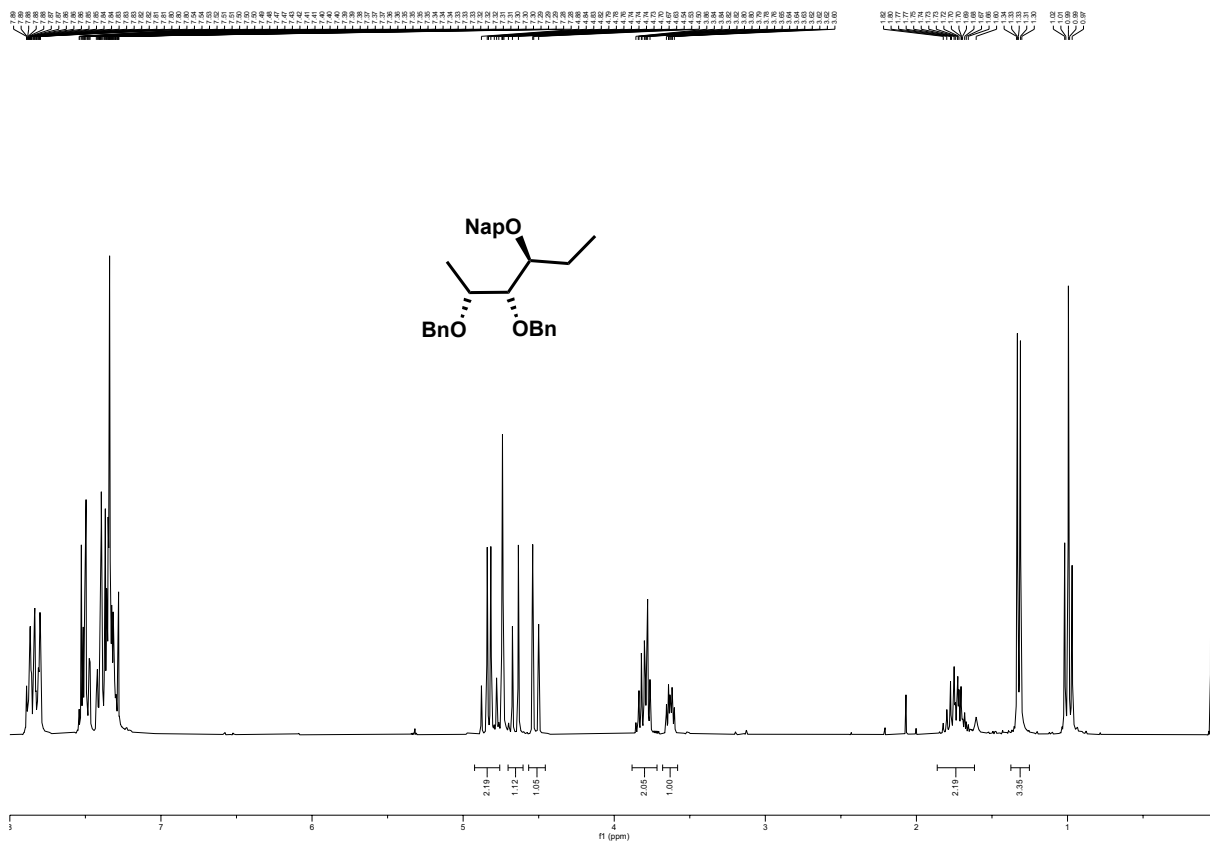

$^{13}\text{C}$  NMR, 126 MHz,  $\text{CDCl}_3$  of **S48**

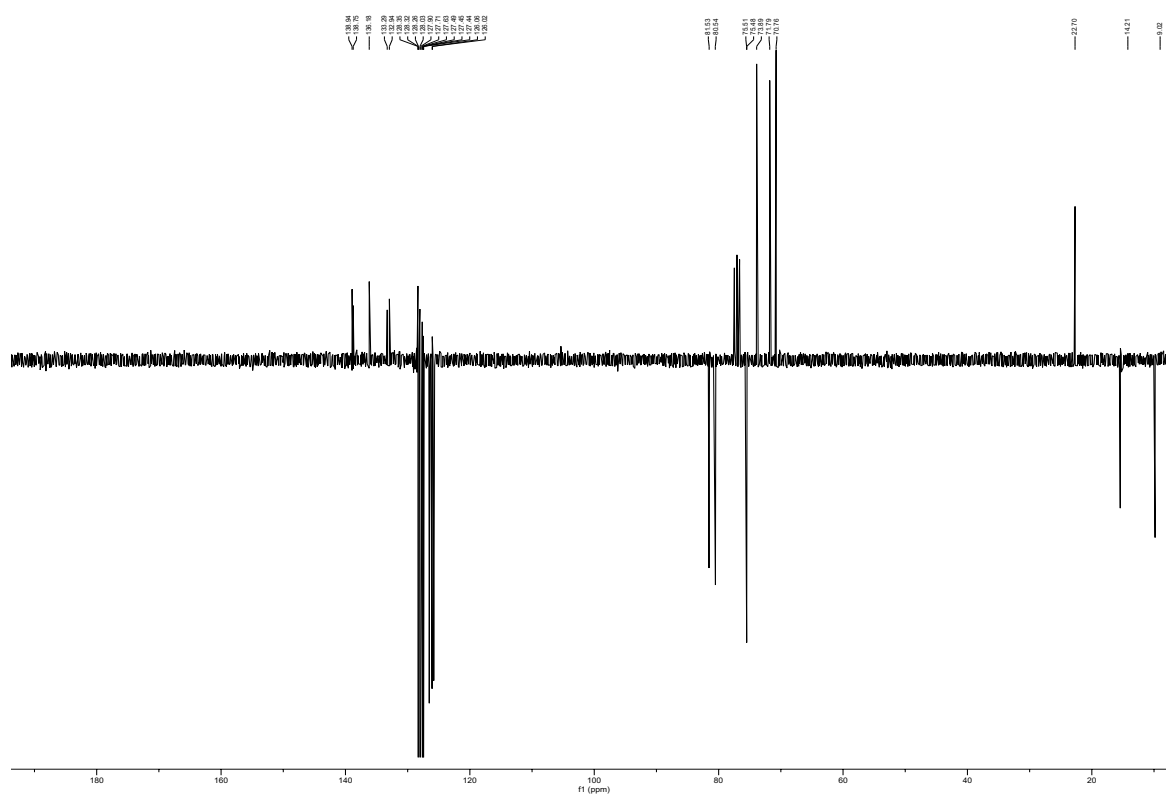

HH-COSY NMR,  $\text{CDCl}_3$  of **S48**

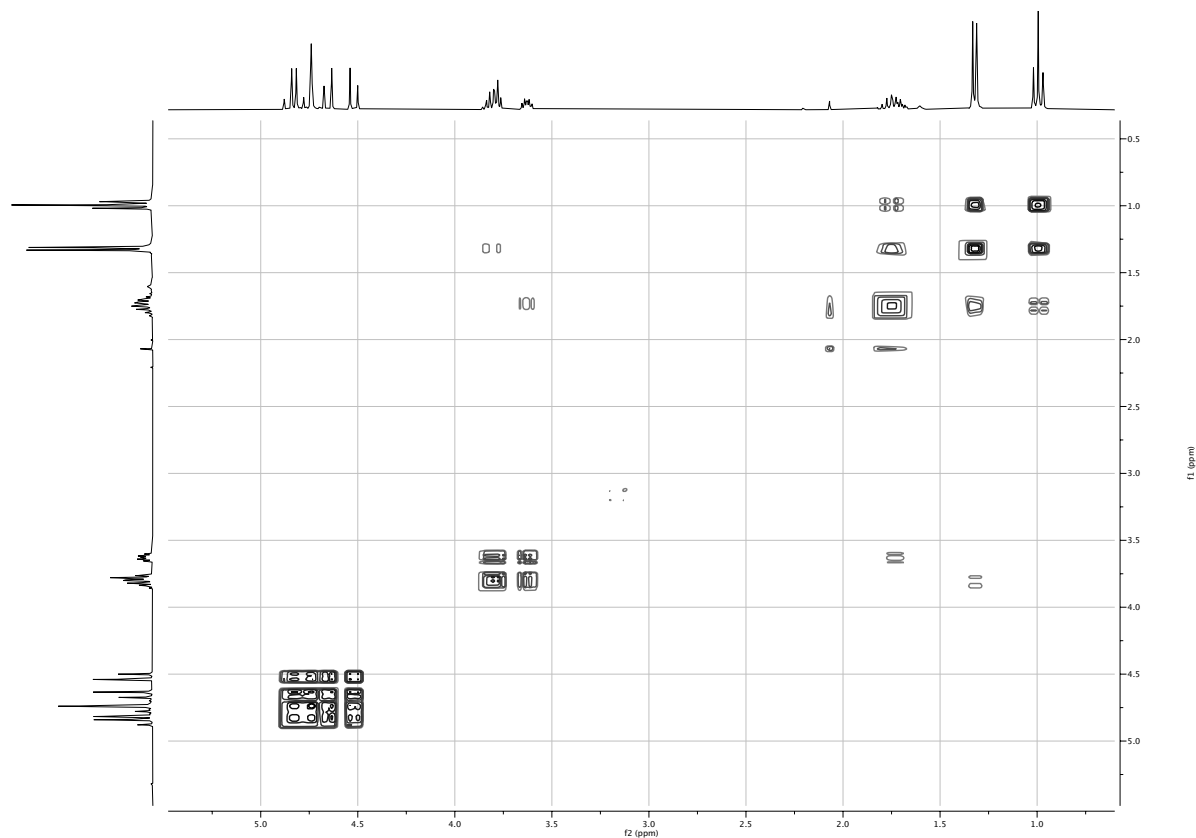

HSQC NMR, CDCl<sub>3</sub> of **S48**

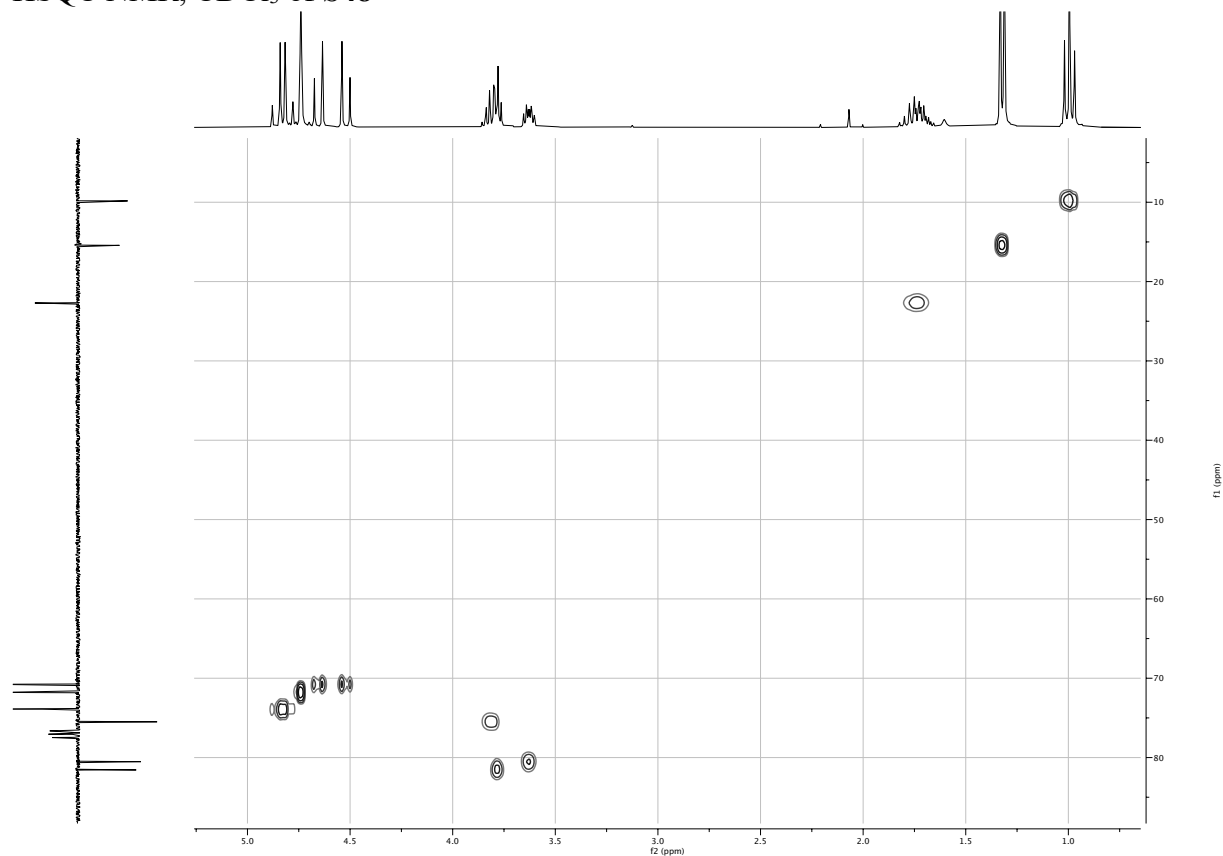

<sup>1</sup>H NMR, 500 MHz, CDCl<sub>3</sub> of **28**

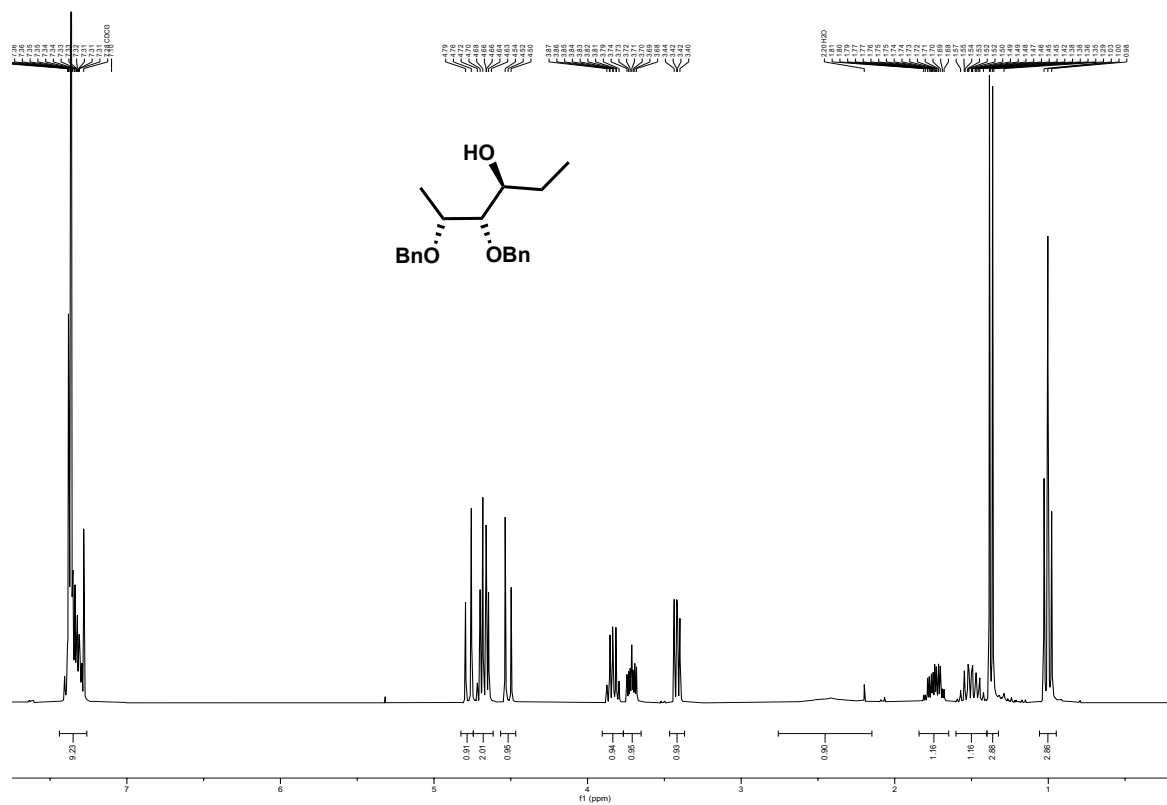



HSQC NMR, CDCl<sub>3</sub> of **28**

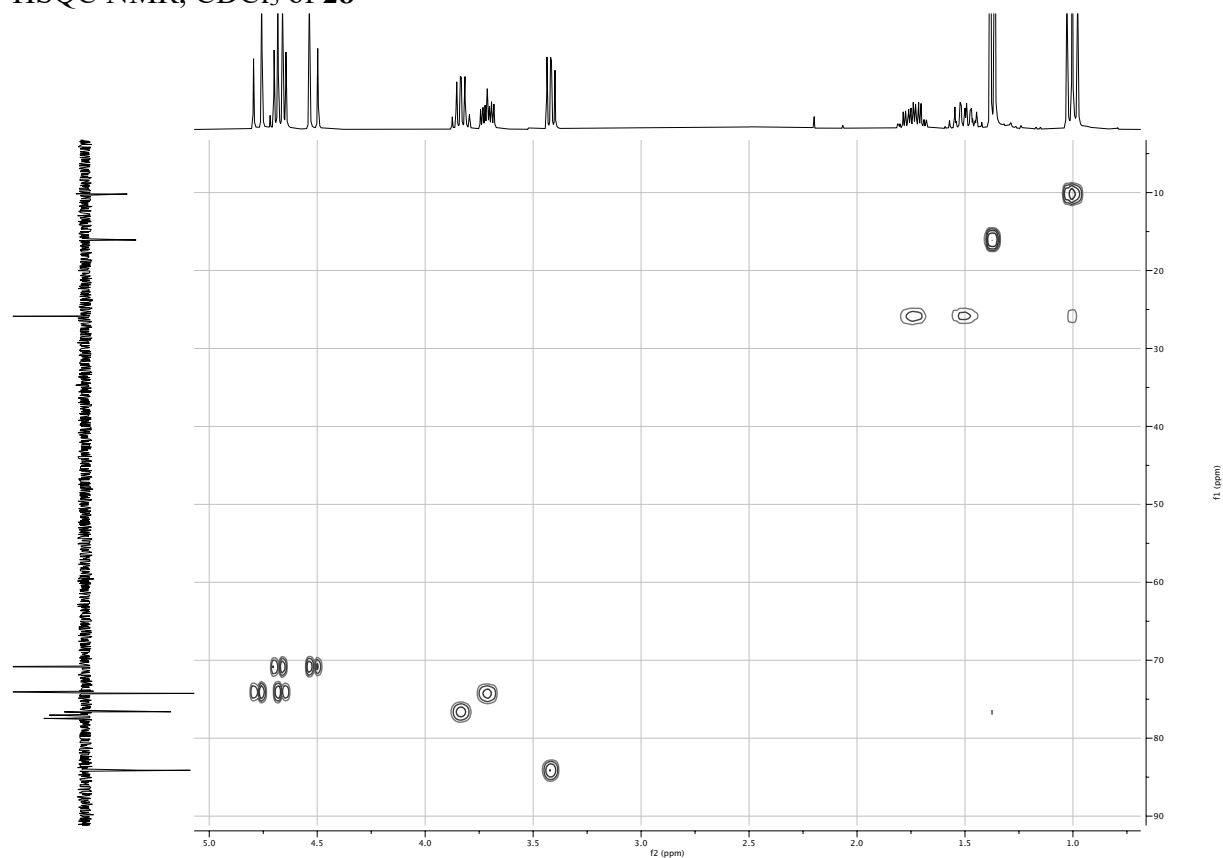

<sup>1</sup>H NMR, 500 MHz, CDCl<sub>3</sub> of **S49**

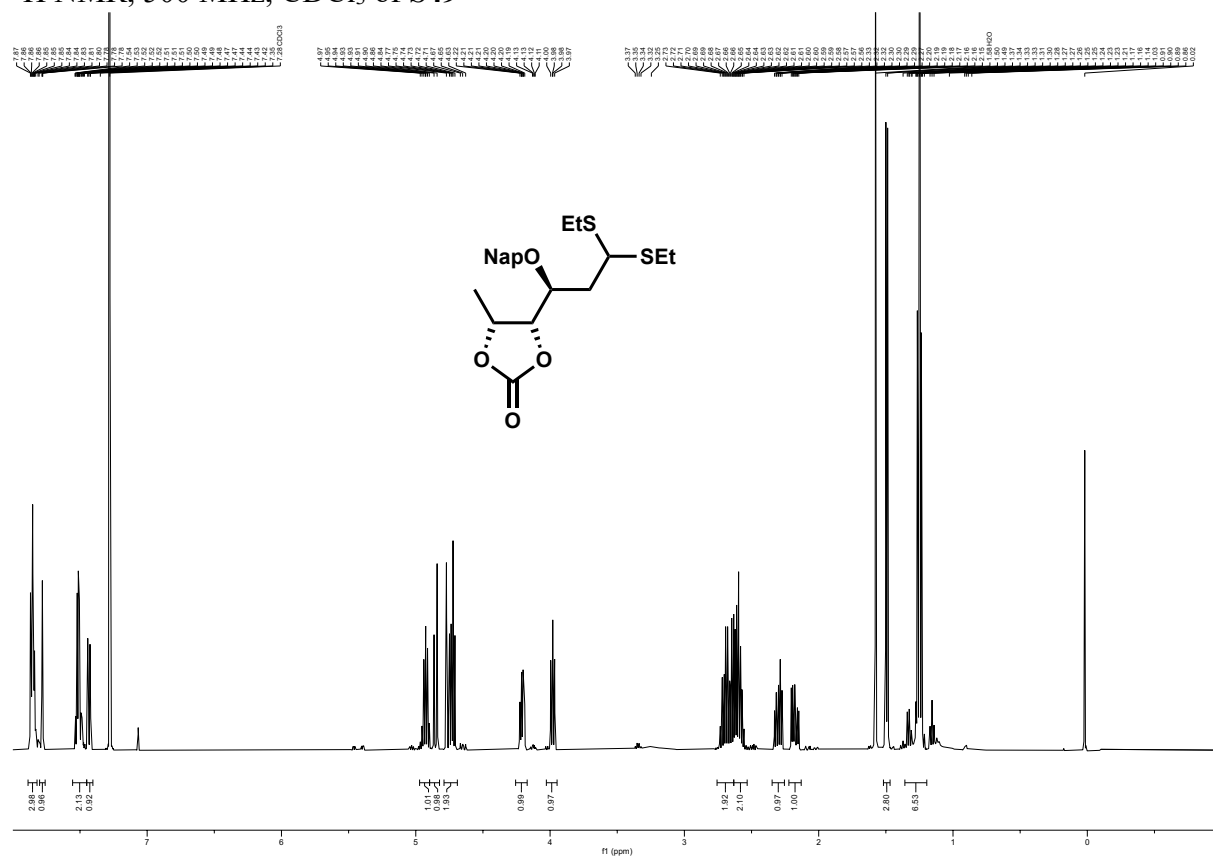

$^{13}\text{C}$  NMR, 126 MHz,  $\text{CDCl}_3$  of **S49**

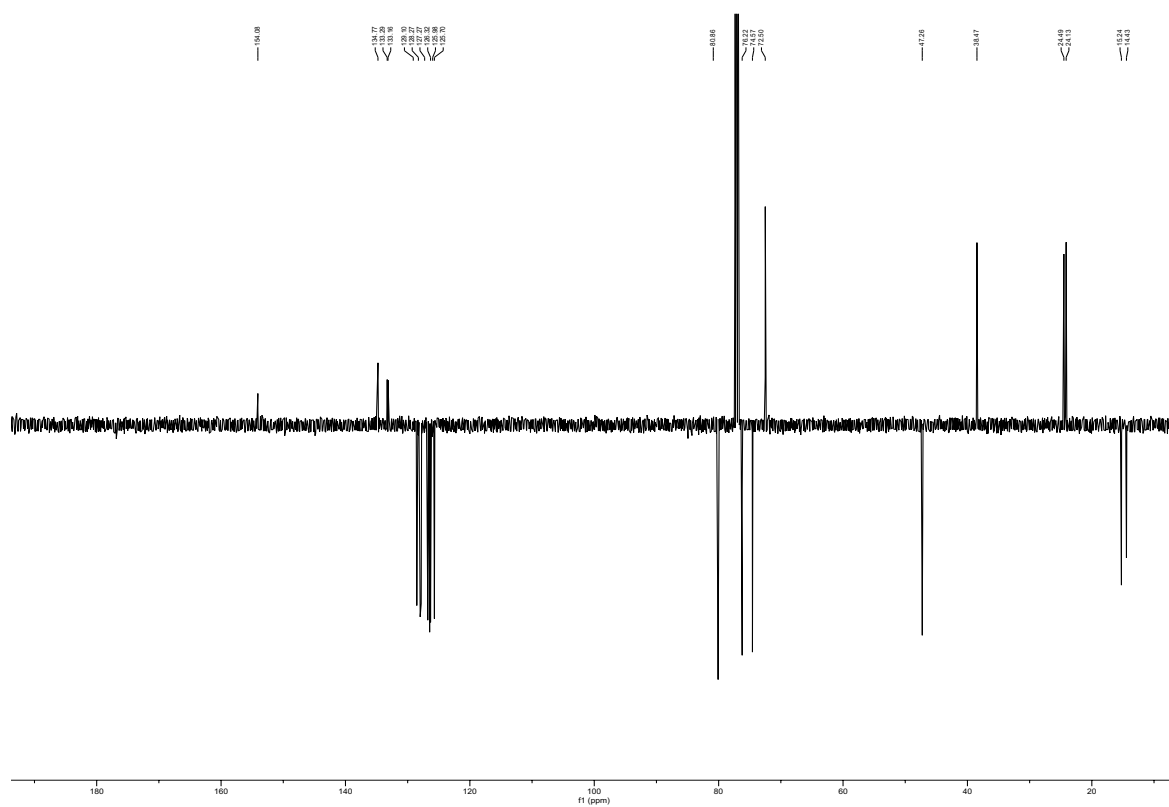

HH-COSY NMR,  $\text{CDCl}_3$  of **S49**

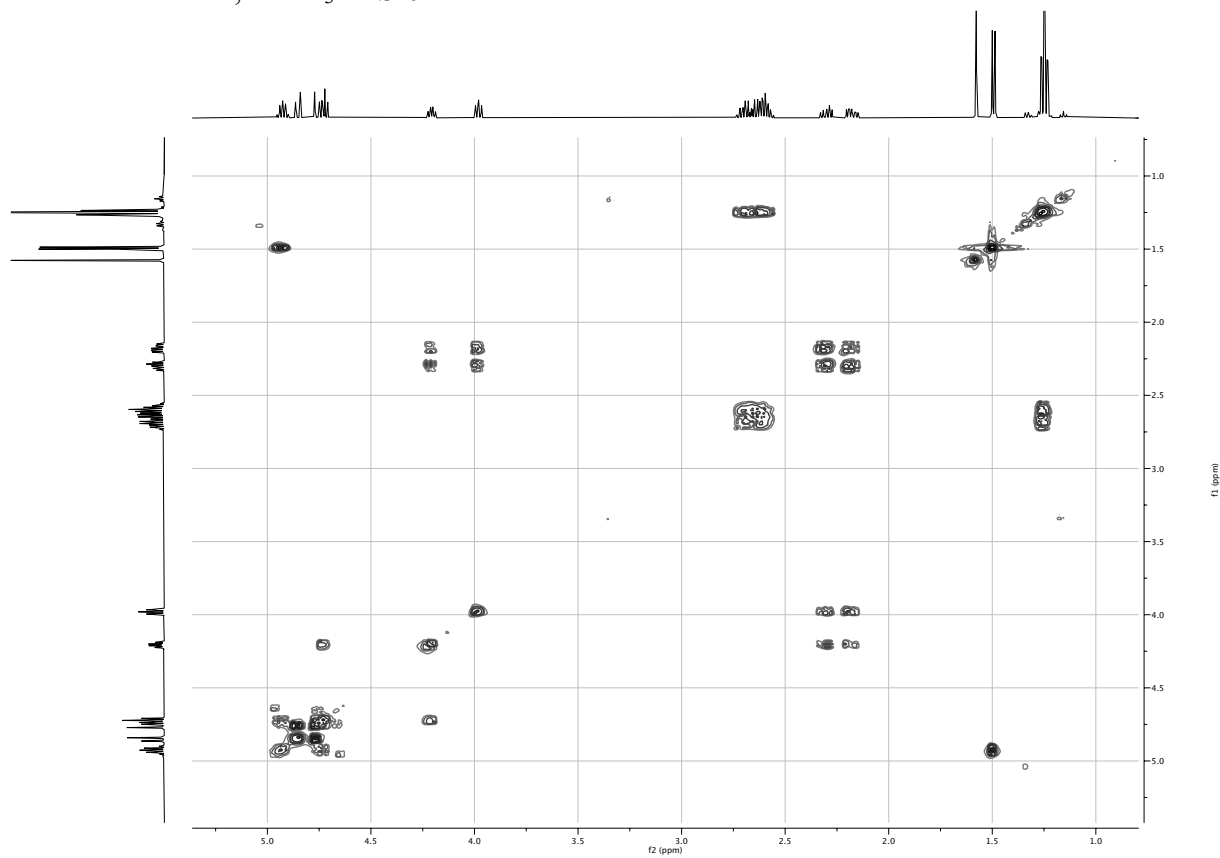

# HSQC NMR, CDCl<sub>3</sub> of S49

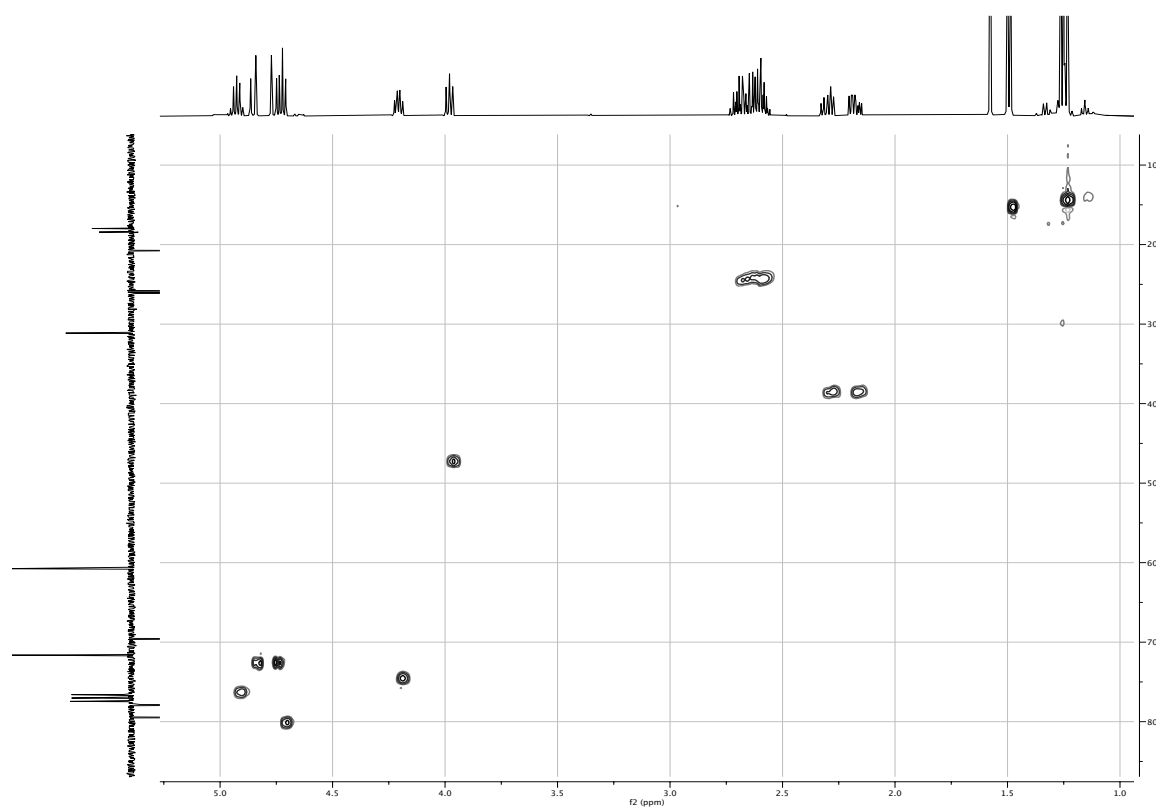

# <sup>1</sup>H NMR, 500 MHz, CDCl<sub>3</sub> of S50

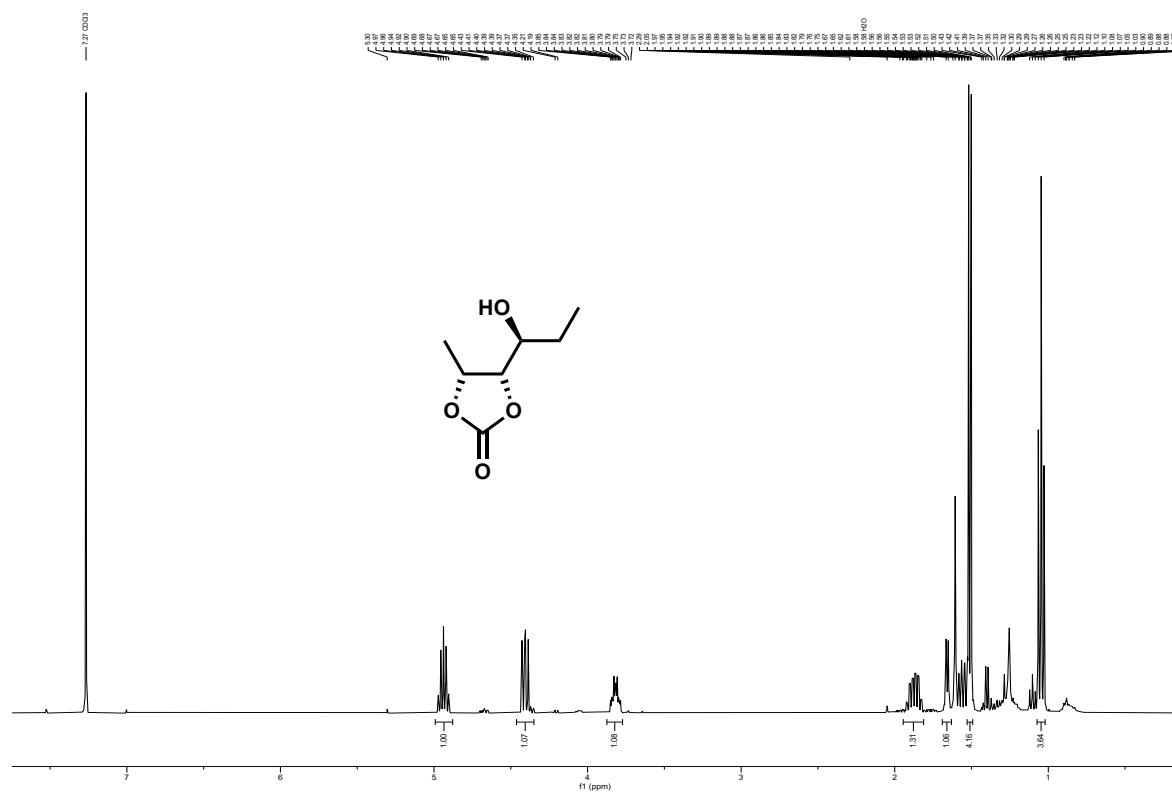



$^{13}\text{C}$  NMR, 126 MHz,  $\text{CDCl}_3$  of **S50**

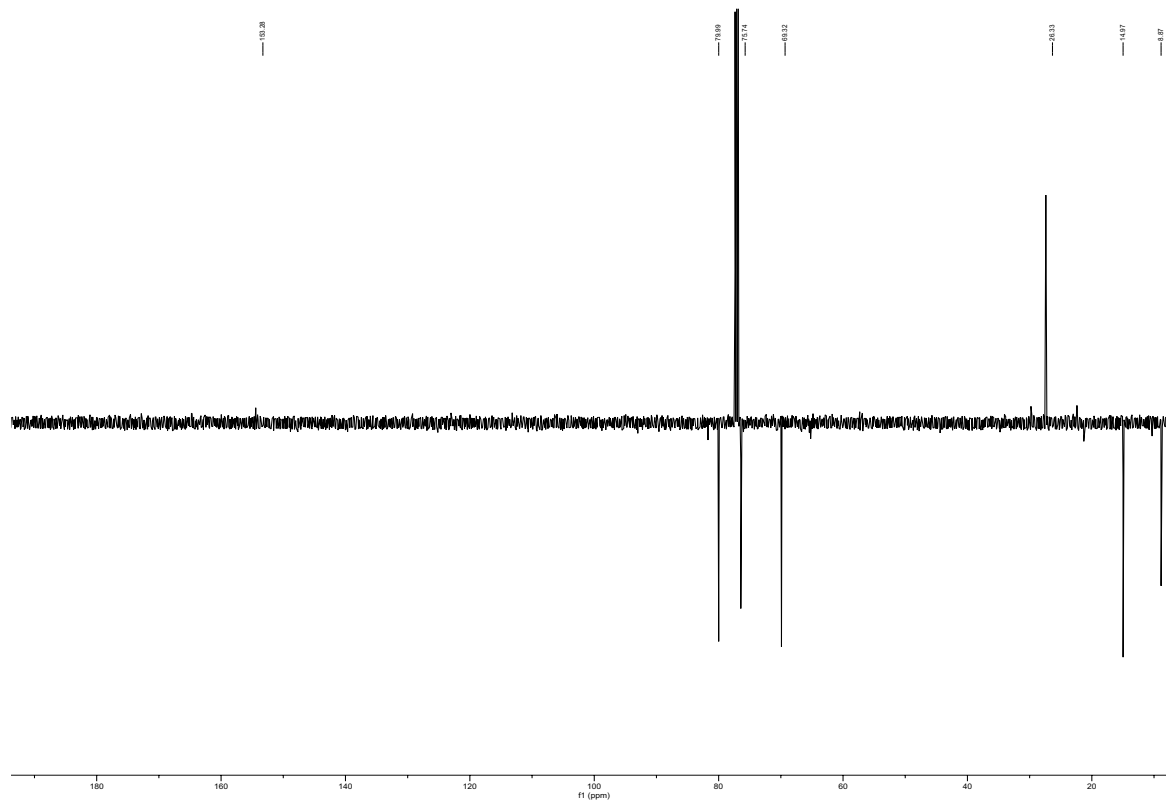

HH-COSY NMR,  $\text{CDCl}_3$  of **S50**

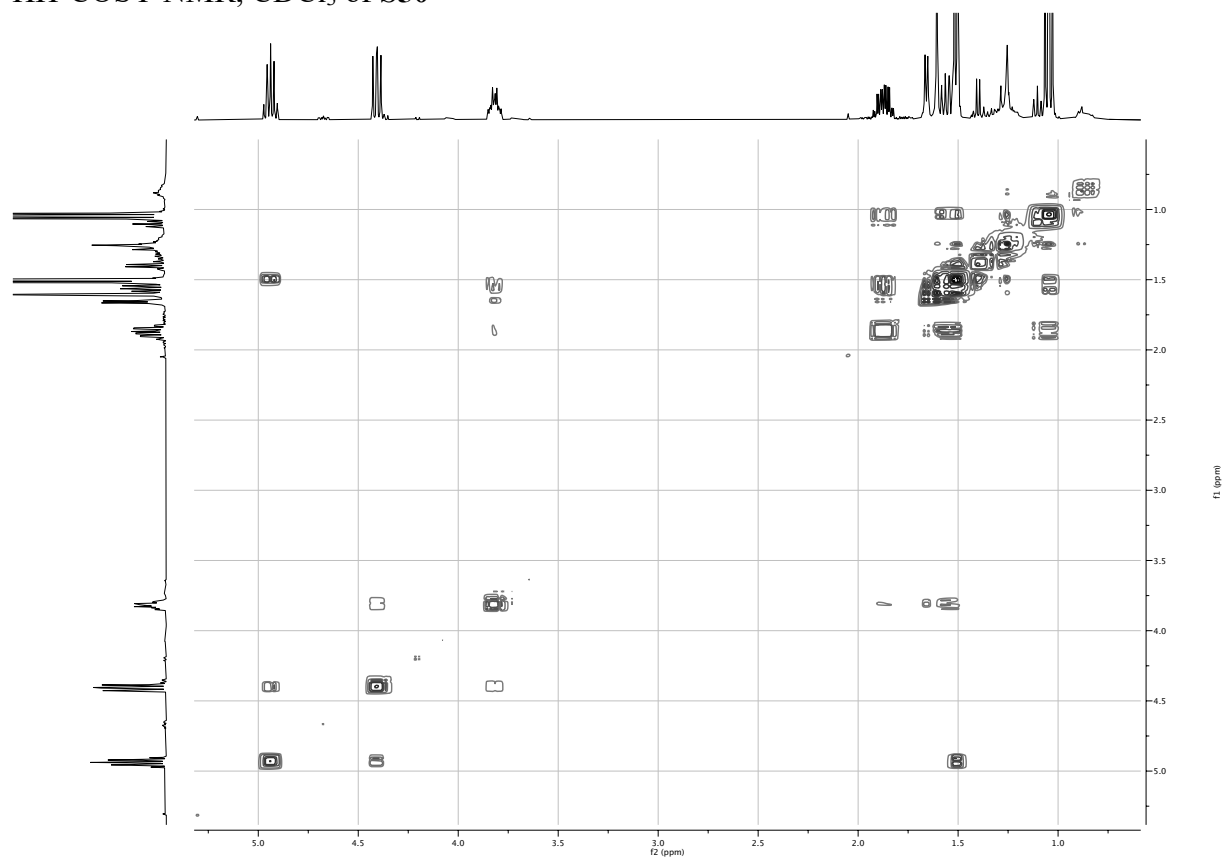

### HSQC NMR, CDCl<sub>3</sub> of **S50**

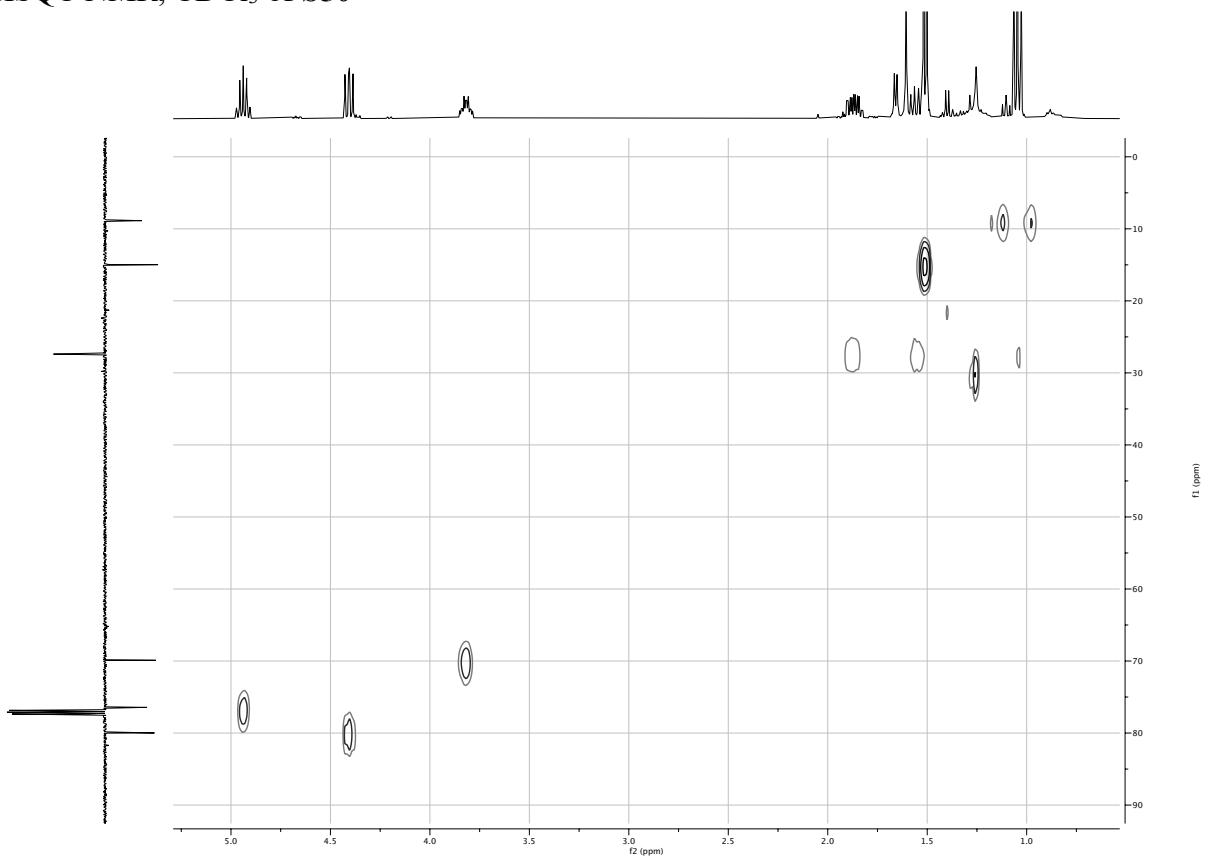

### HMBC NMR, CDCl<sub>3</sub> of **S50**

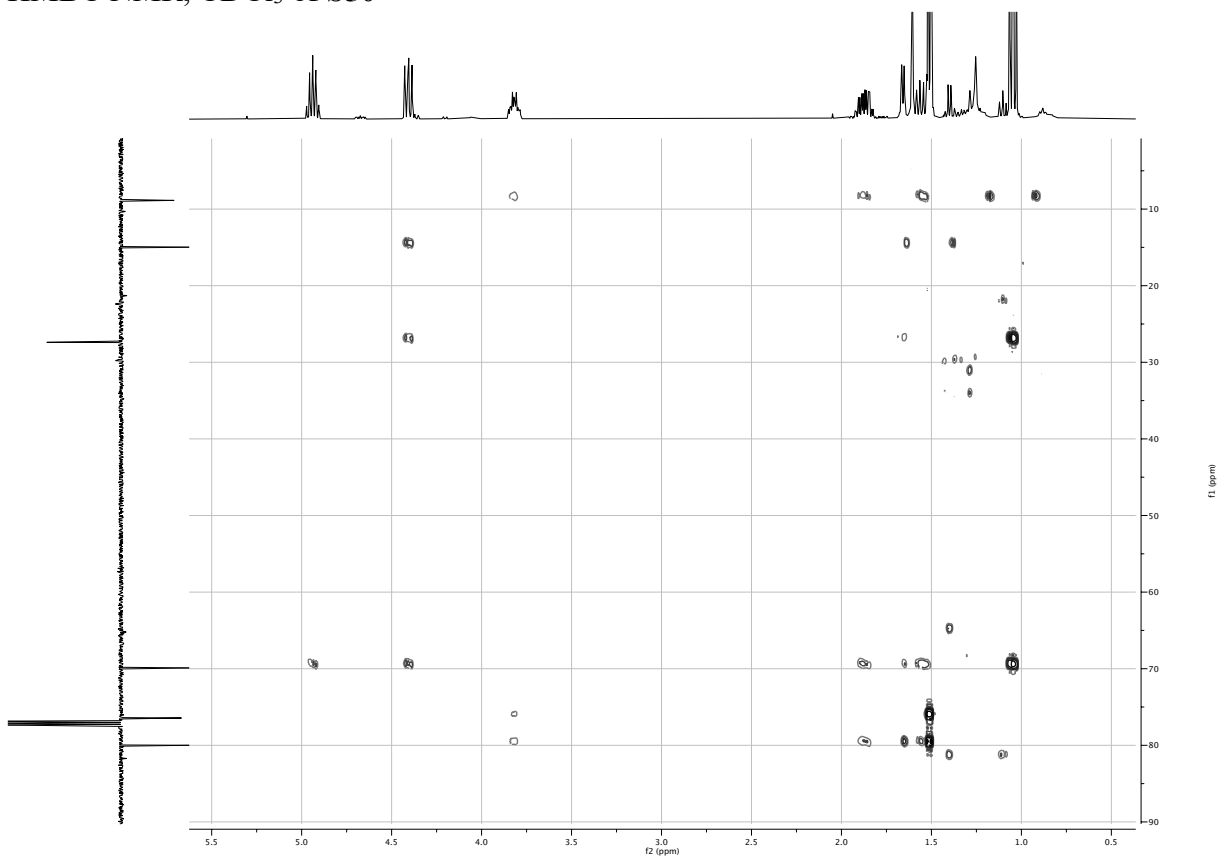

<sup>1</sup>H NMR, 500 MHz, CDCl<sub>3</sub> of S52

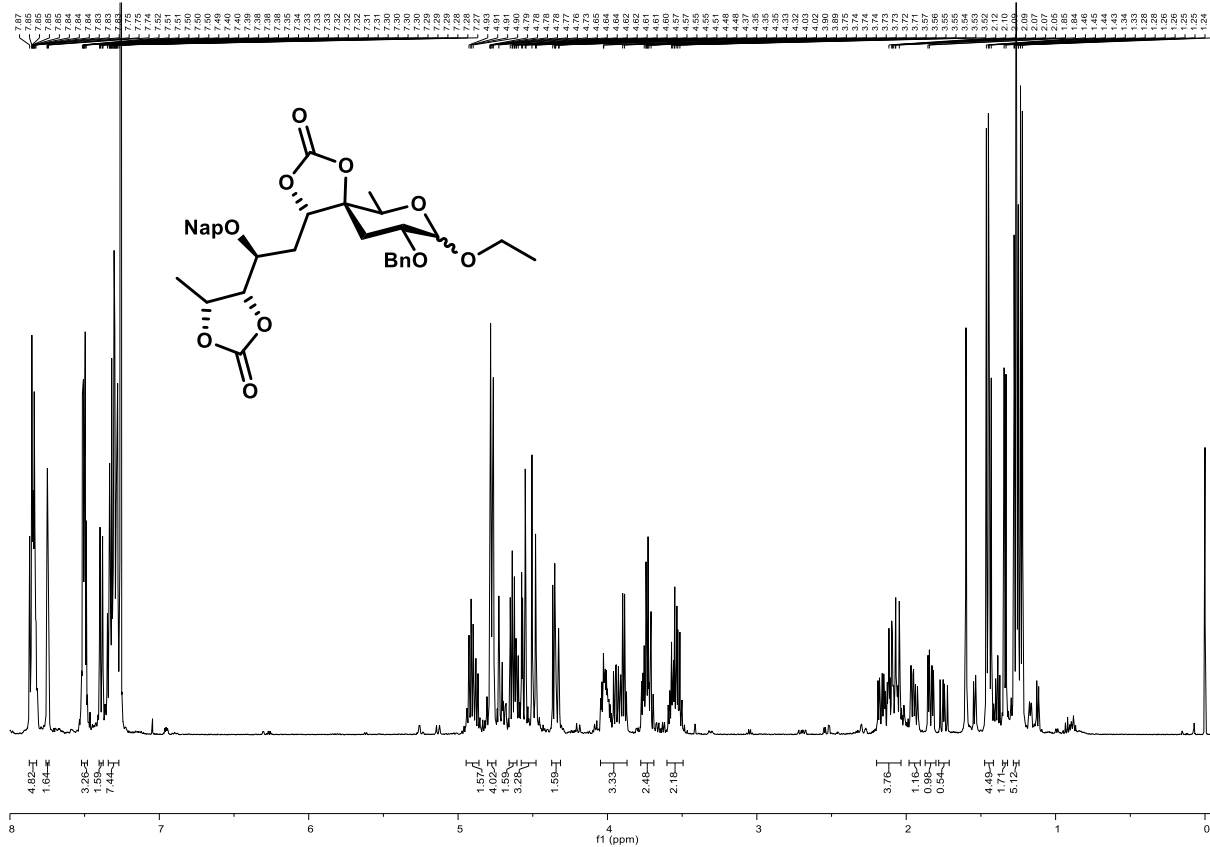

<sup>13</sup>C NMR, 126 MHz, CDCl<sub>3</sub> of S52

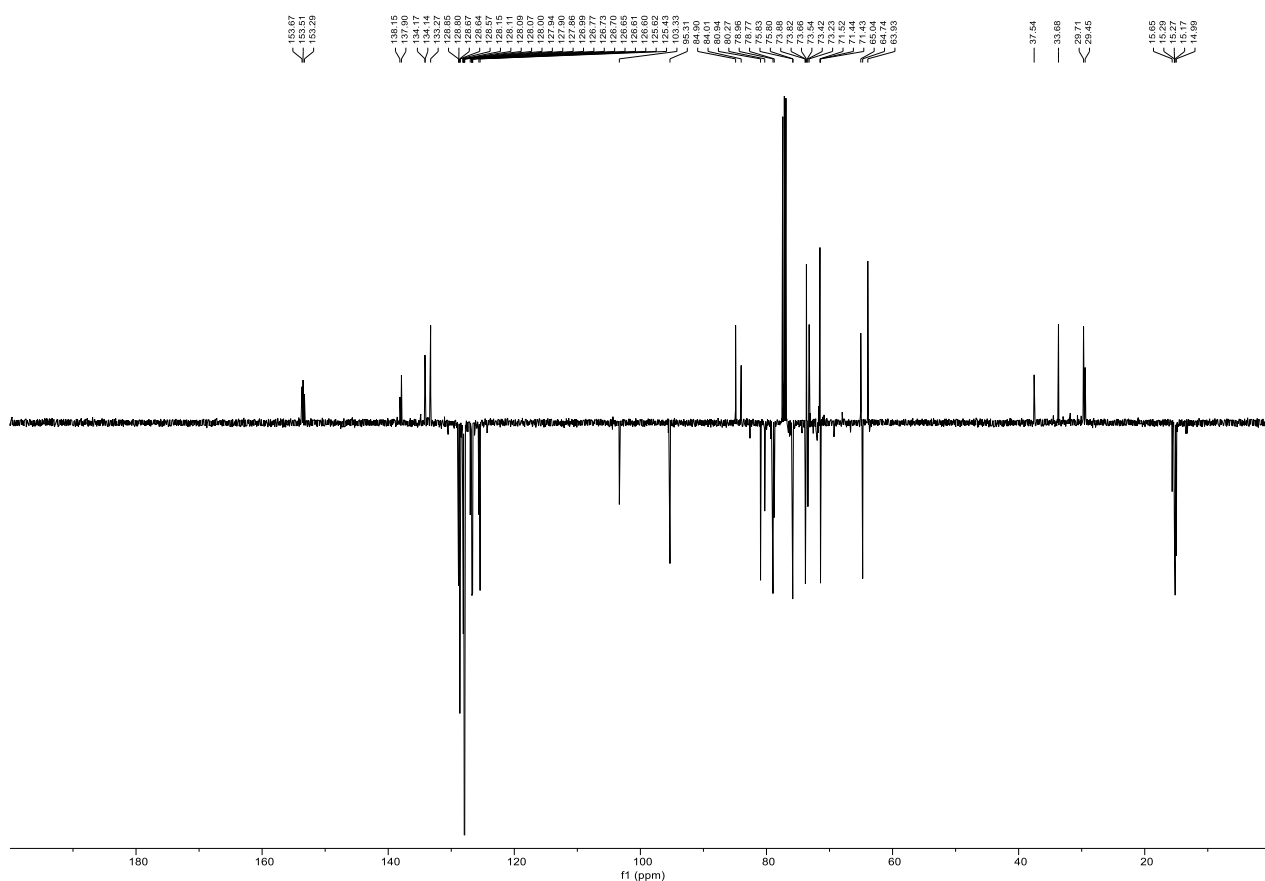

HH-COSY NMR, CDCl<sub>3</sub> of S52

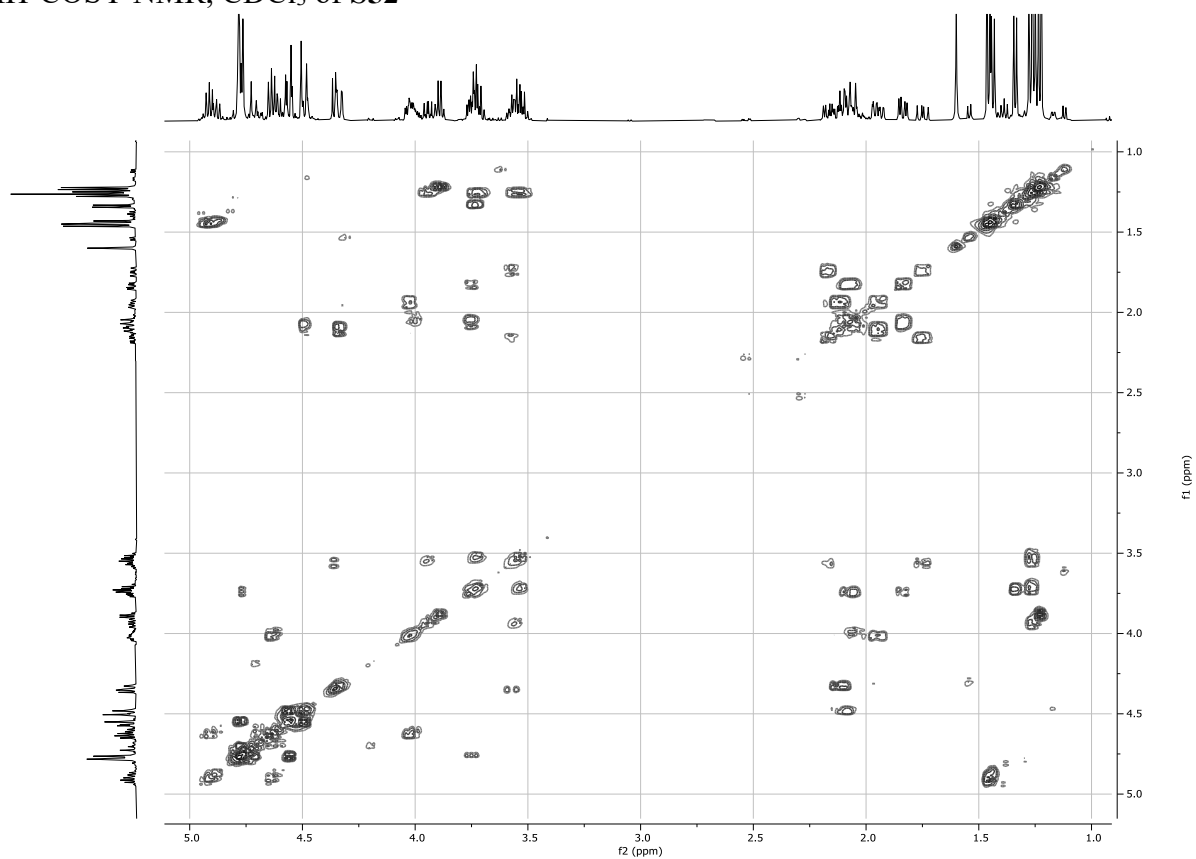

HSQC NMR, CDCl<sub>3</sub> of S52

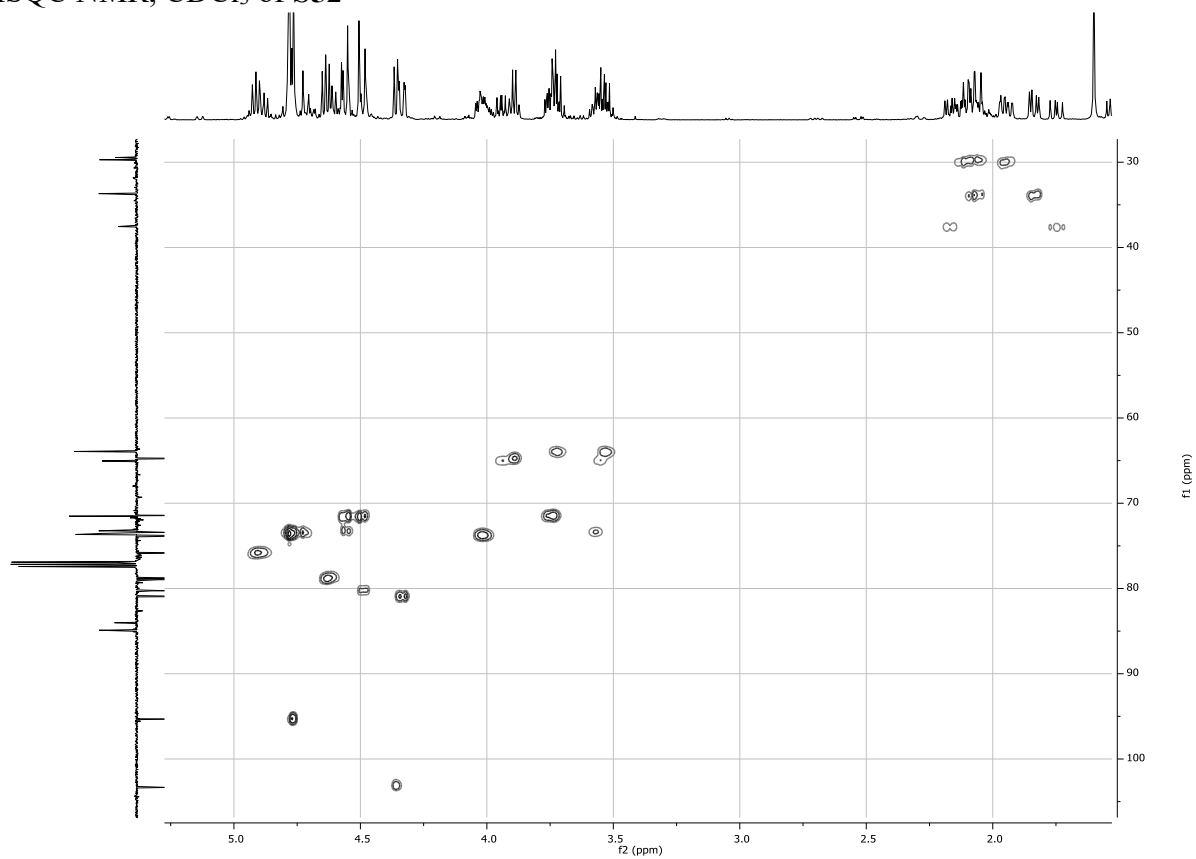

<sup>1</sup>H NMR, 500 MHz, CDCl<sub>3</sub> of **S53**

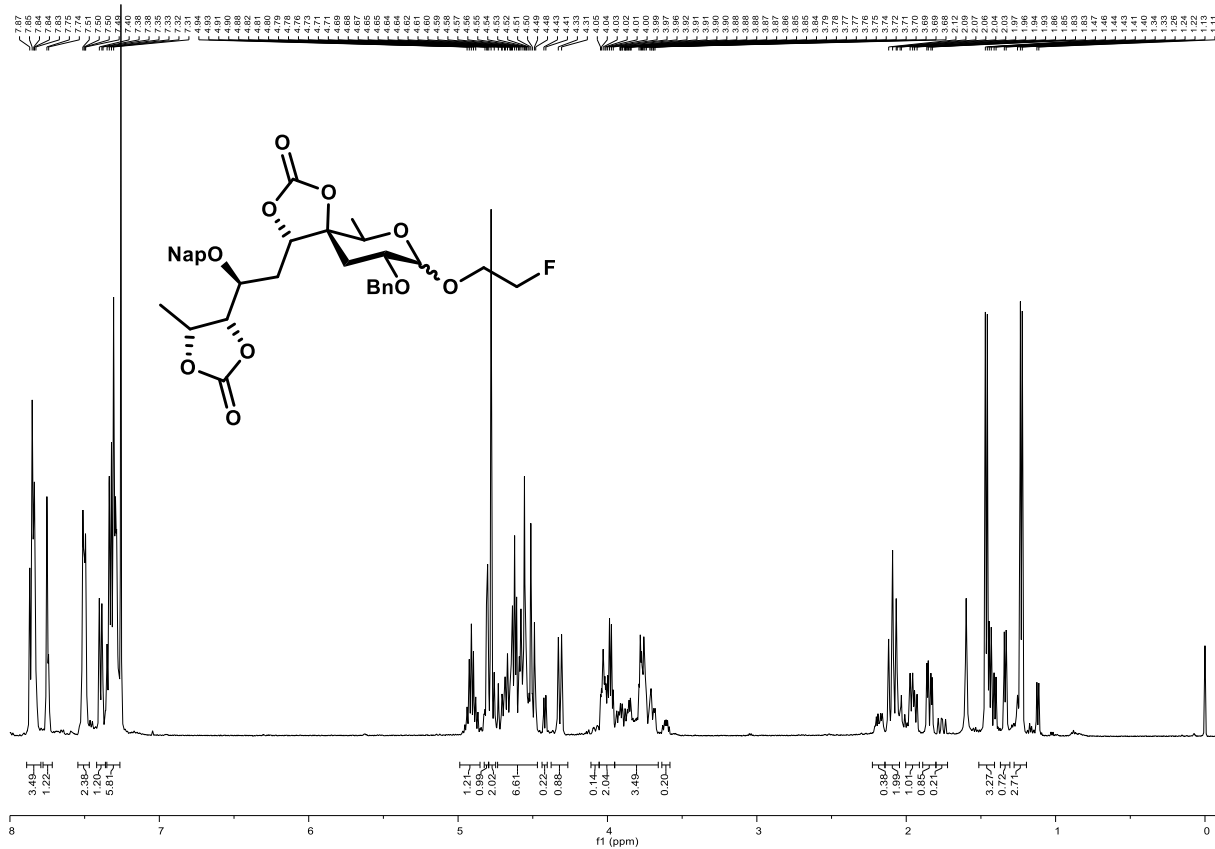

<sup>13</sup>C NMR, 126 MHz, CDCl<sub>3</sub> of **S53**

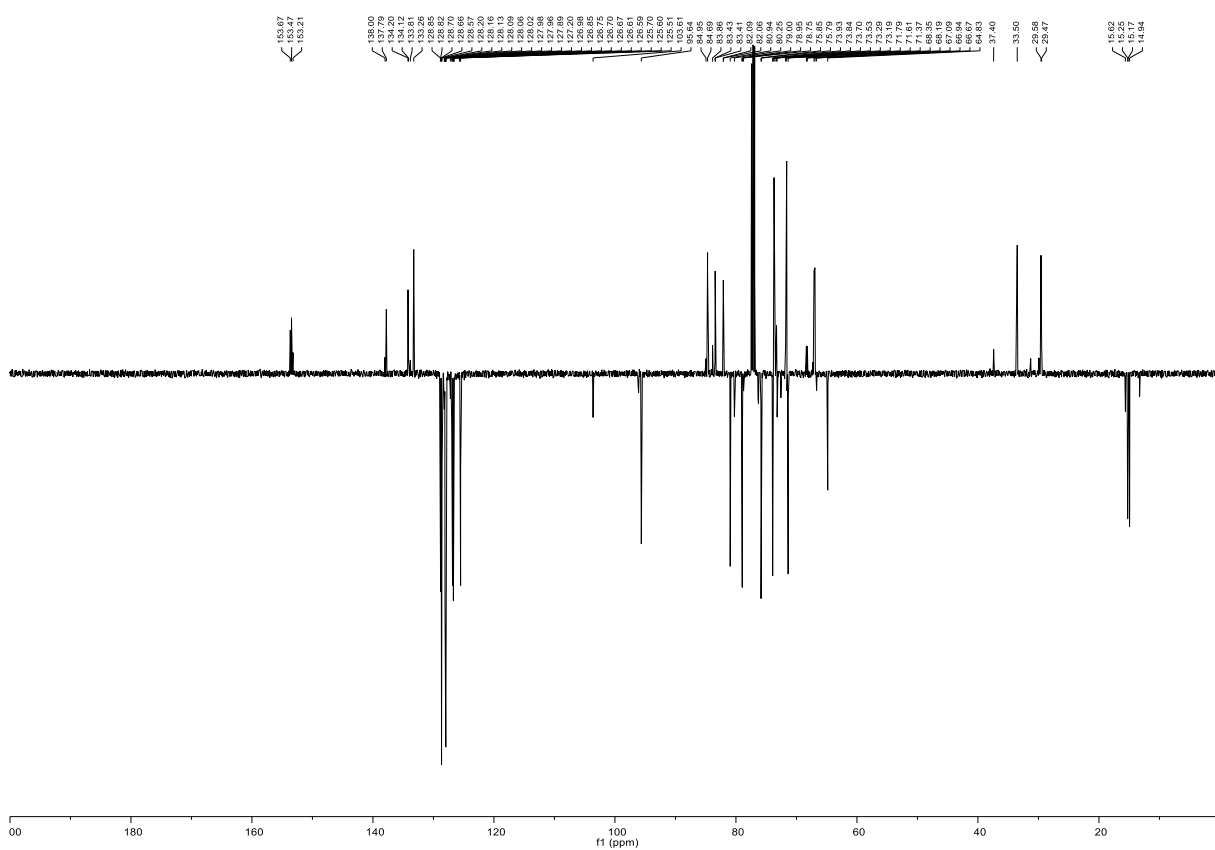

HH-COSY NMR, CDCl<sub>3</sub> of S53

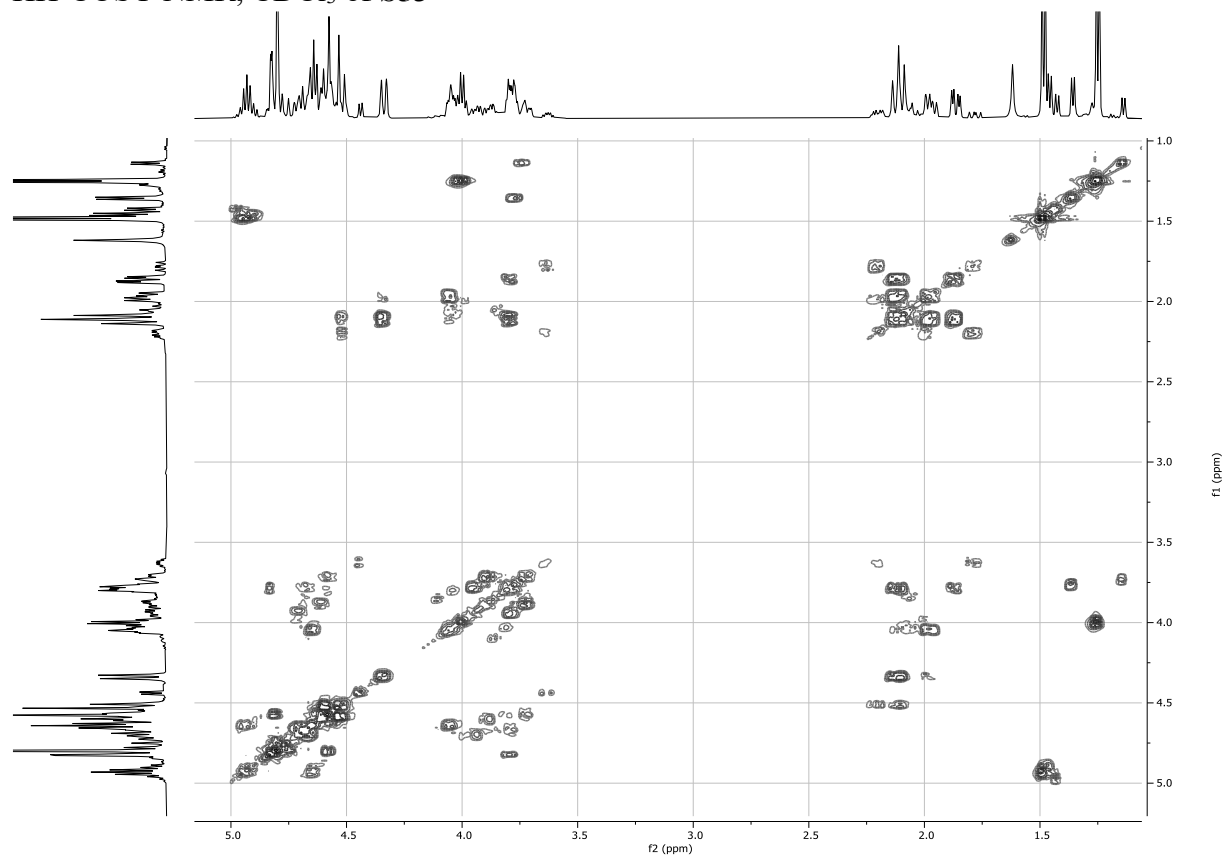

HSQC NMR, CDCl<sub>3</sub> of S53

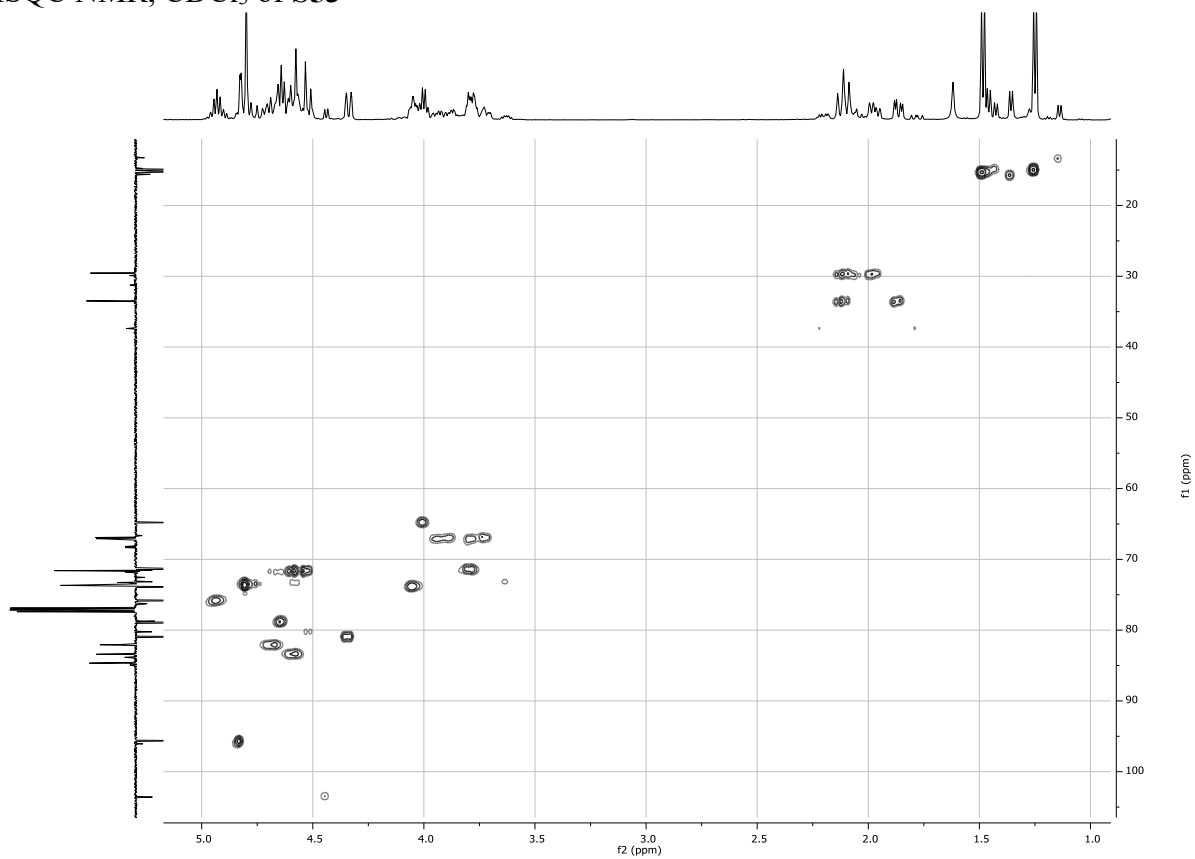

<sup>1</sup>H NMR, 400 MHz, CDCl<sub>3</sub> of S54

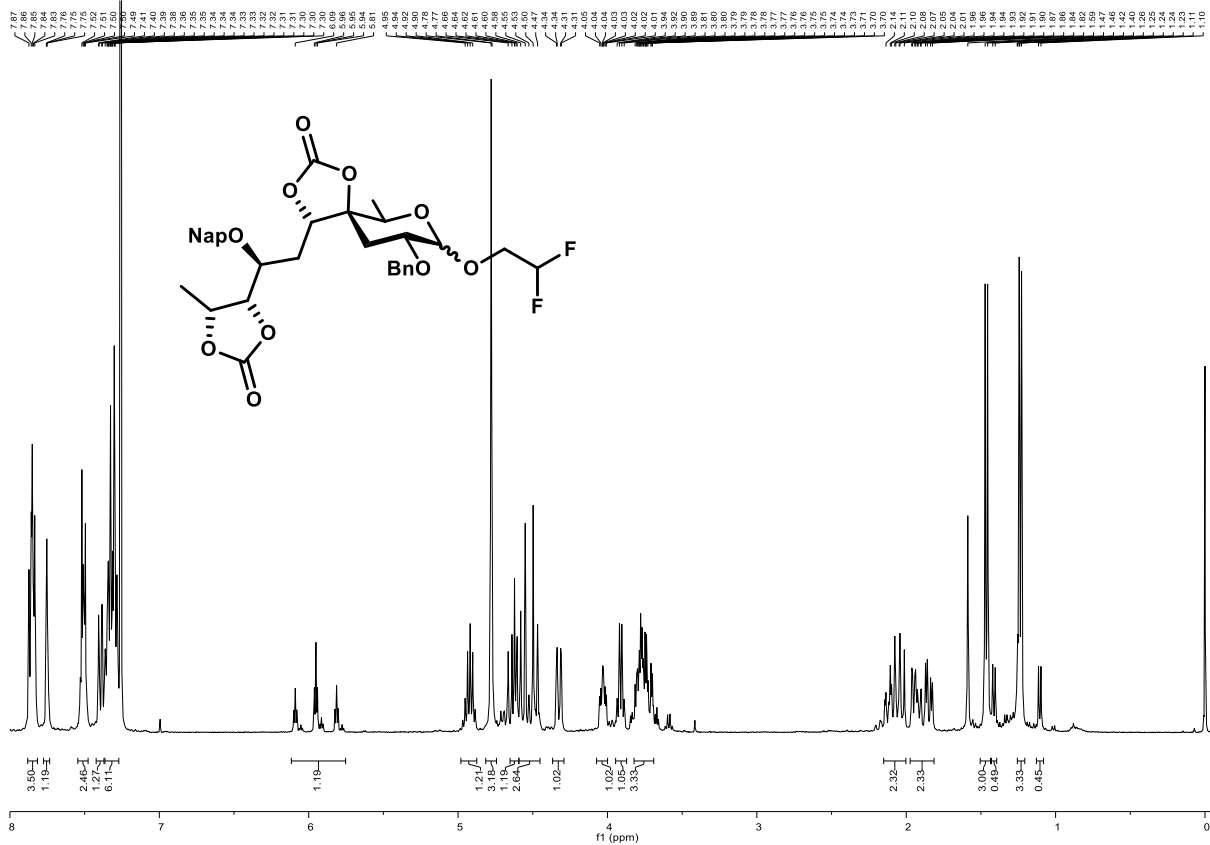

<sup>13</sup>C NMR, 101 MHz, CDCl<sub>3</sub> of S54

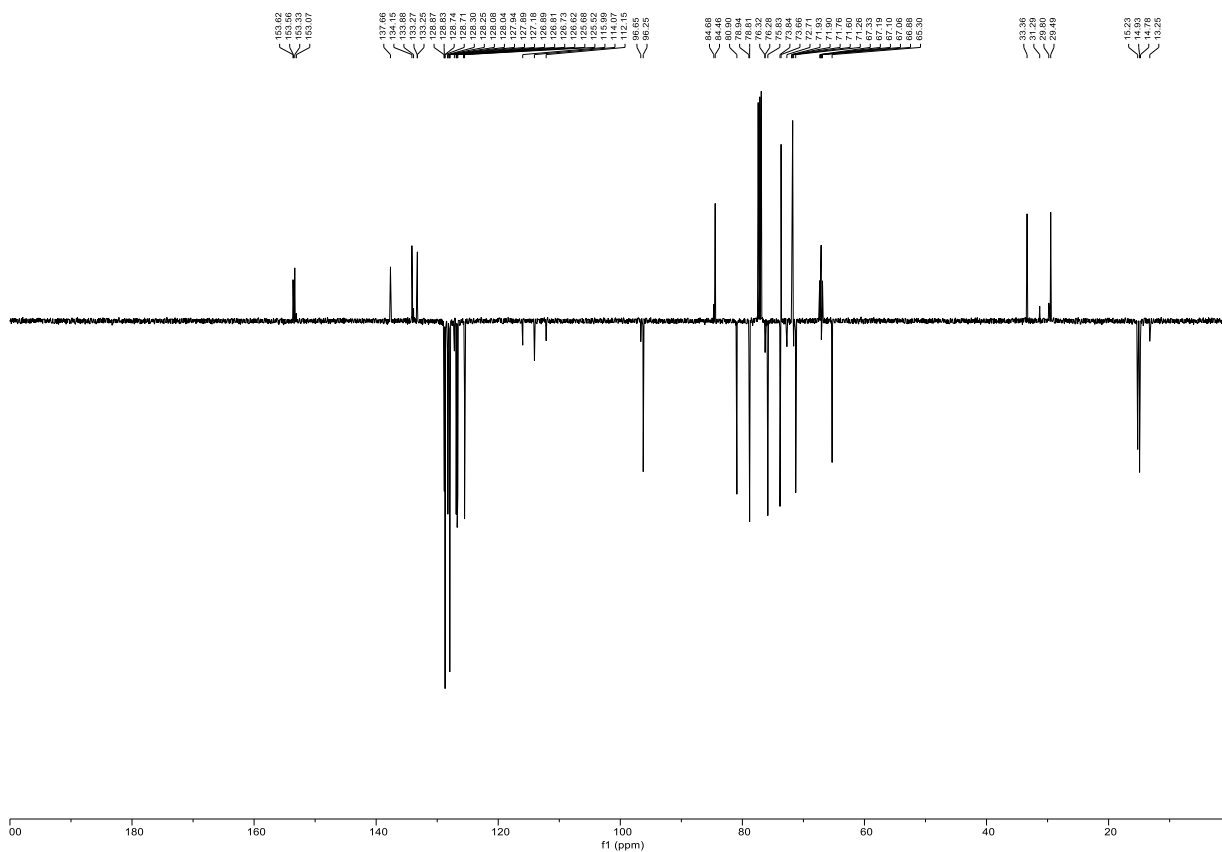

HH-COSY NMR, CDCl<sub>3</sub> of S54

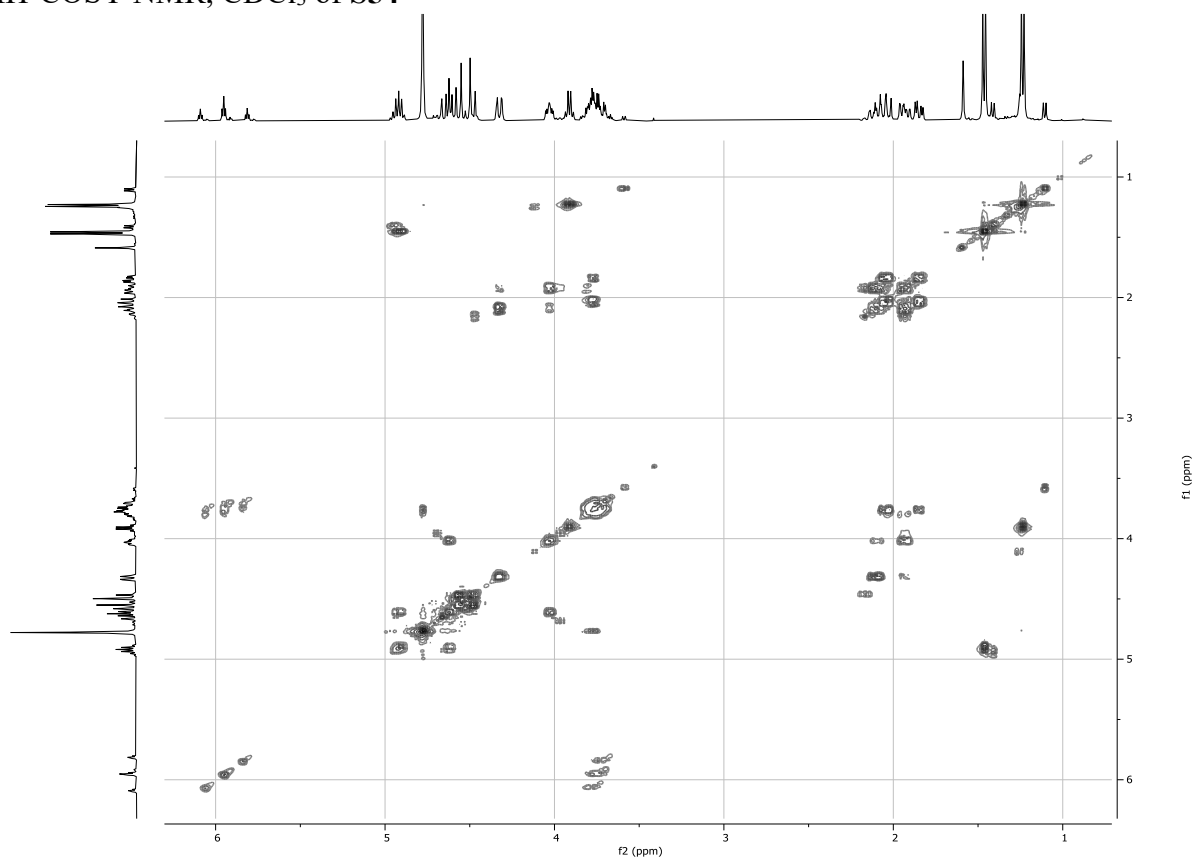

HSQC NMR, CDCl<sub>3</sub> of S54

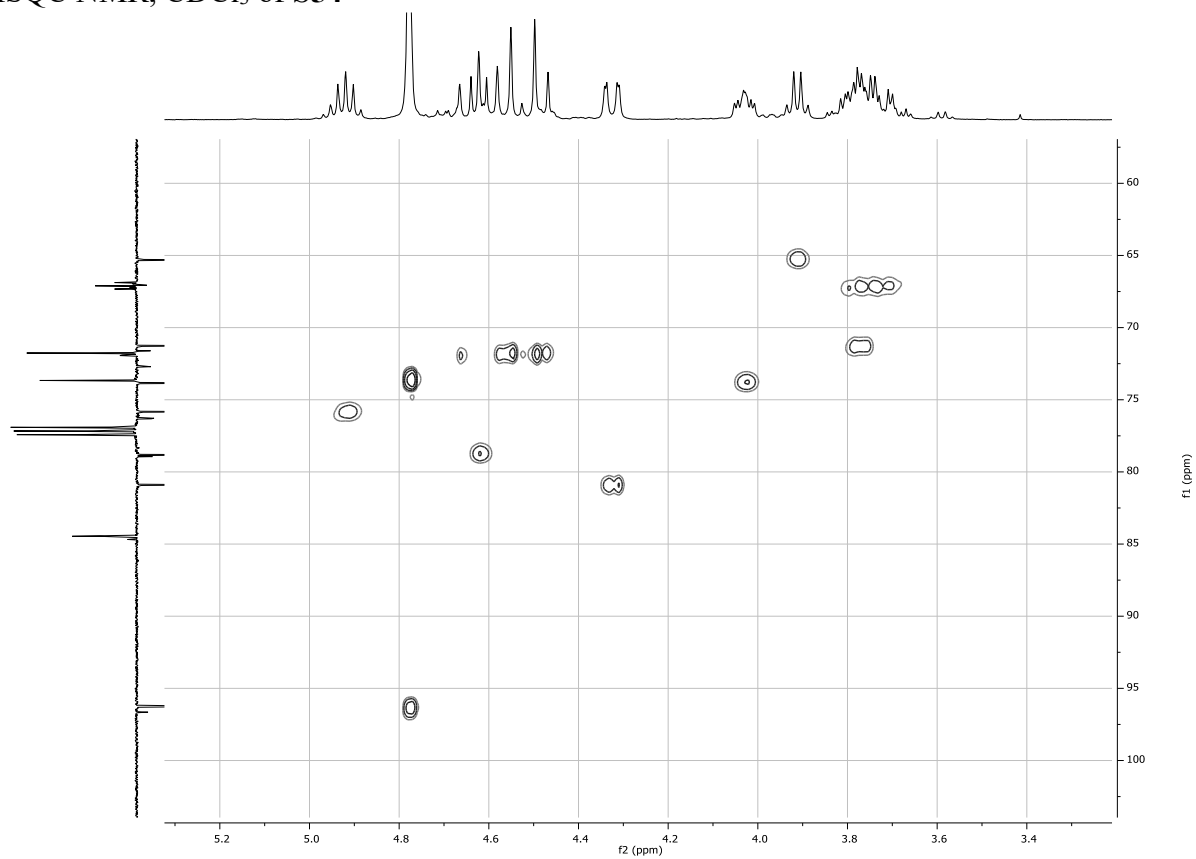



<sup>1</sup>H NMR, 400 MHz, CDCl<sub>3</sub> of **S55**

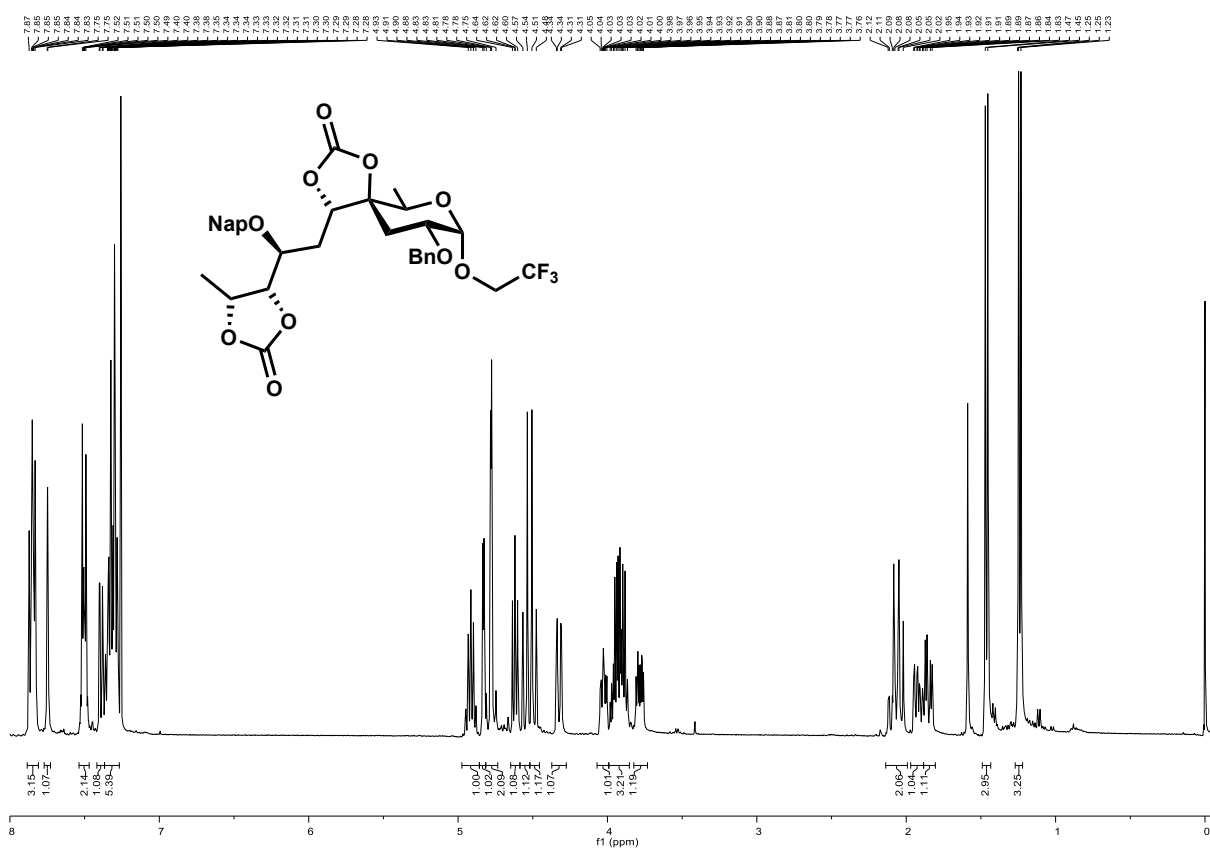

<sup>13</sup>C NMR, 101 MHz, CDCl<sub>3</sub> of **S55**

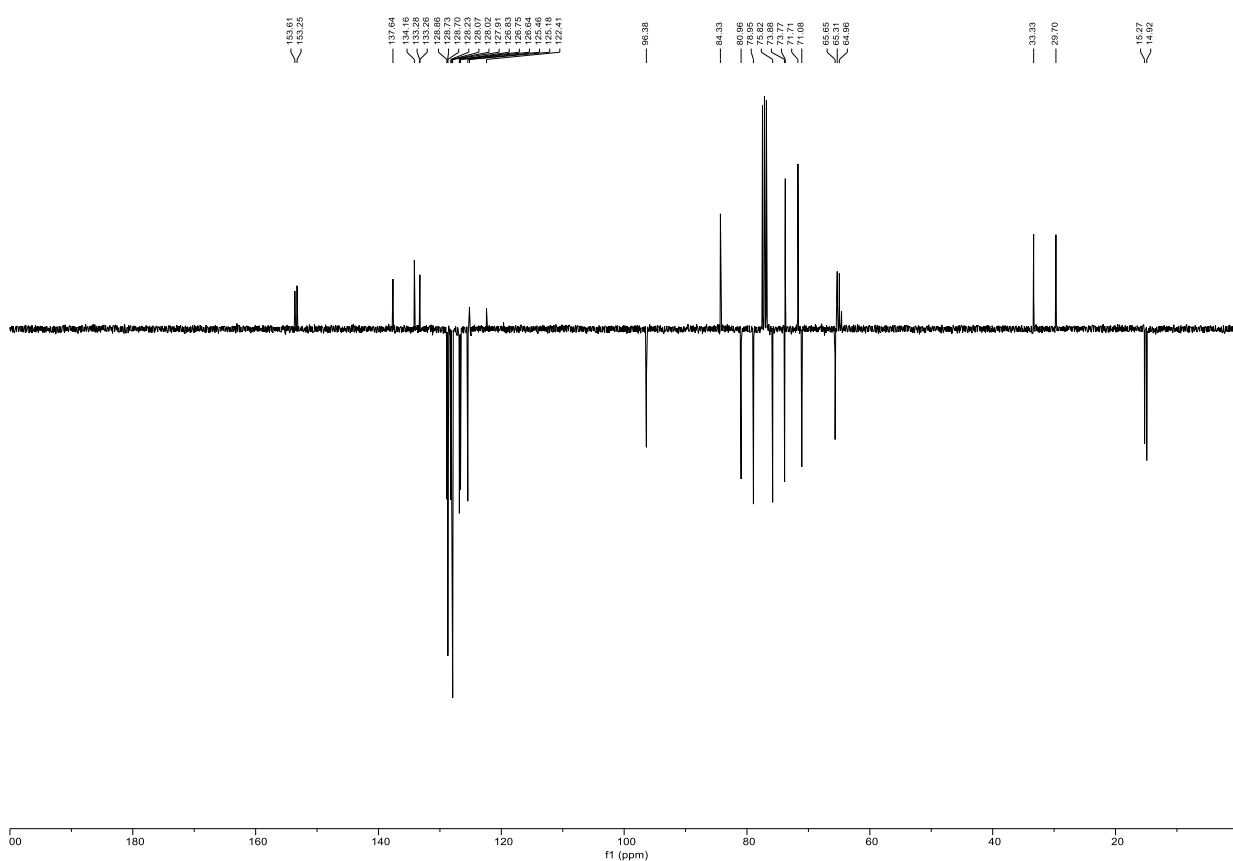

HH-COSY NMR, CDCl<sub>3</sub> of **S55**

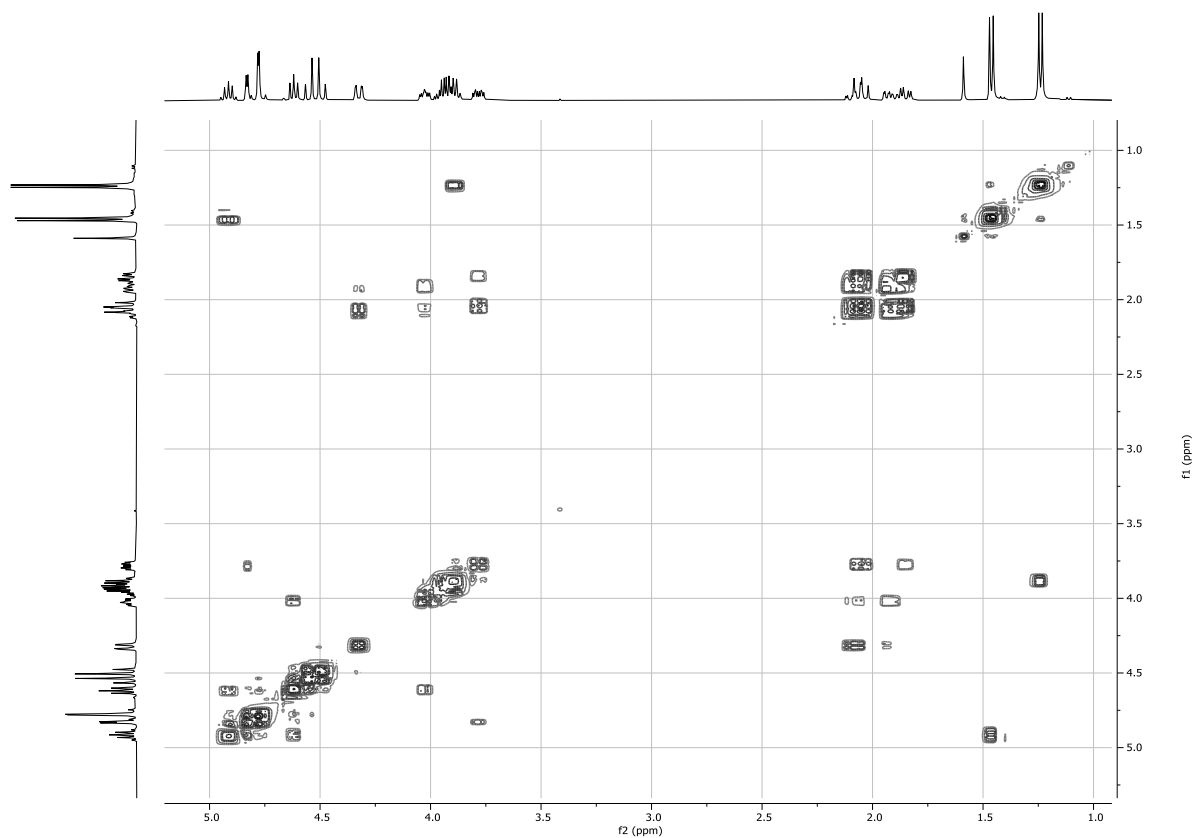

HSQC NMR, CDCl<sub>3</sub> of **S55**

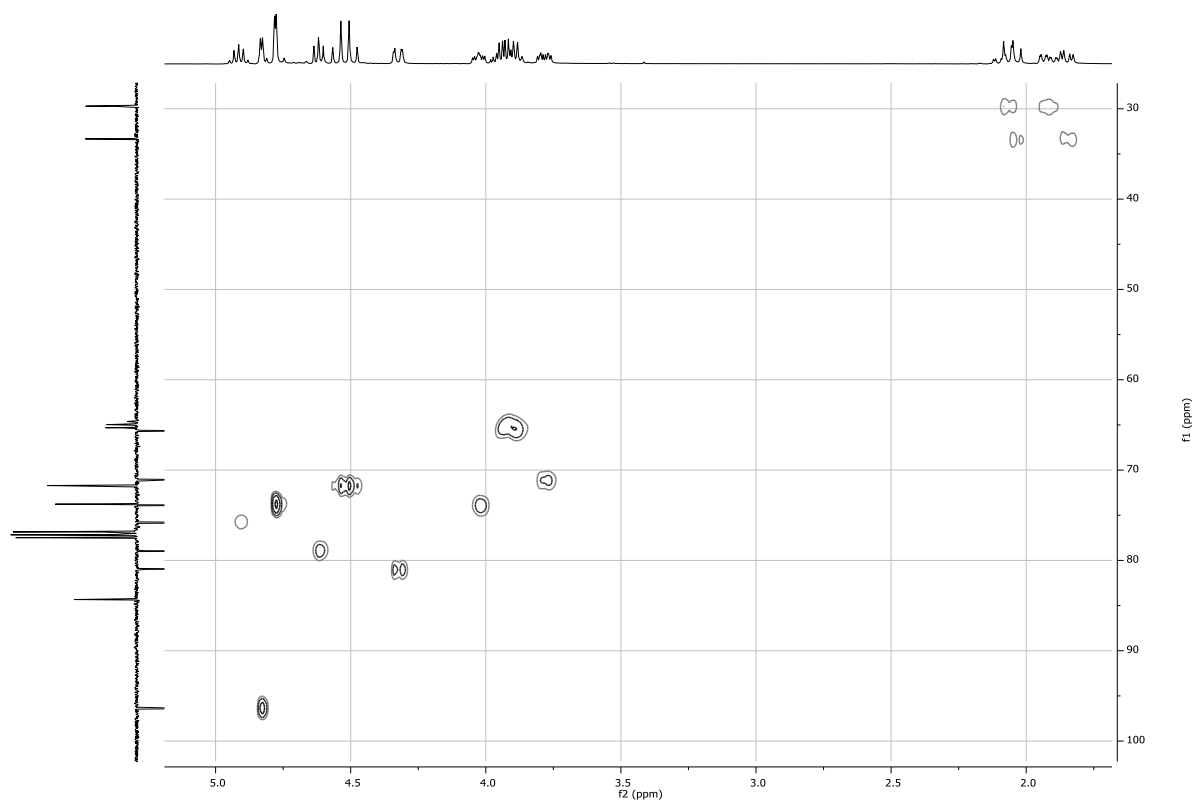

<sup>1</sup>H NMR, 500 MHz, CDCl<sub>3</sub> of **S56**

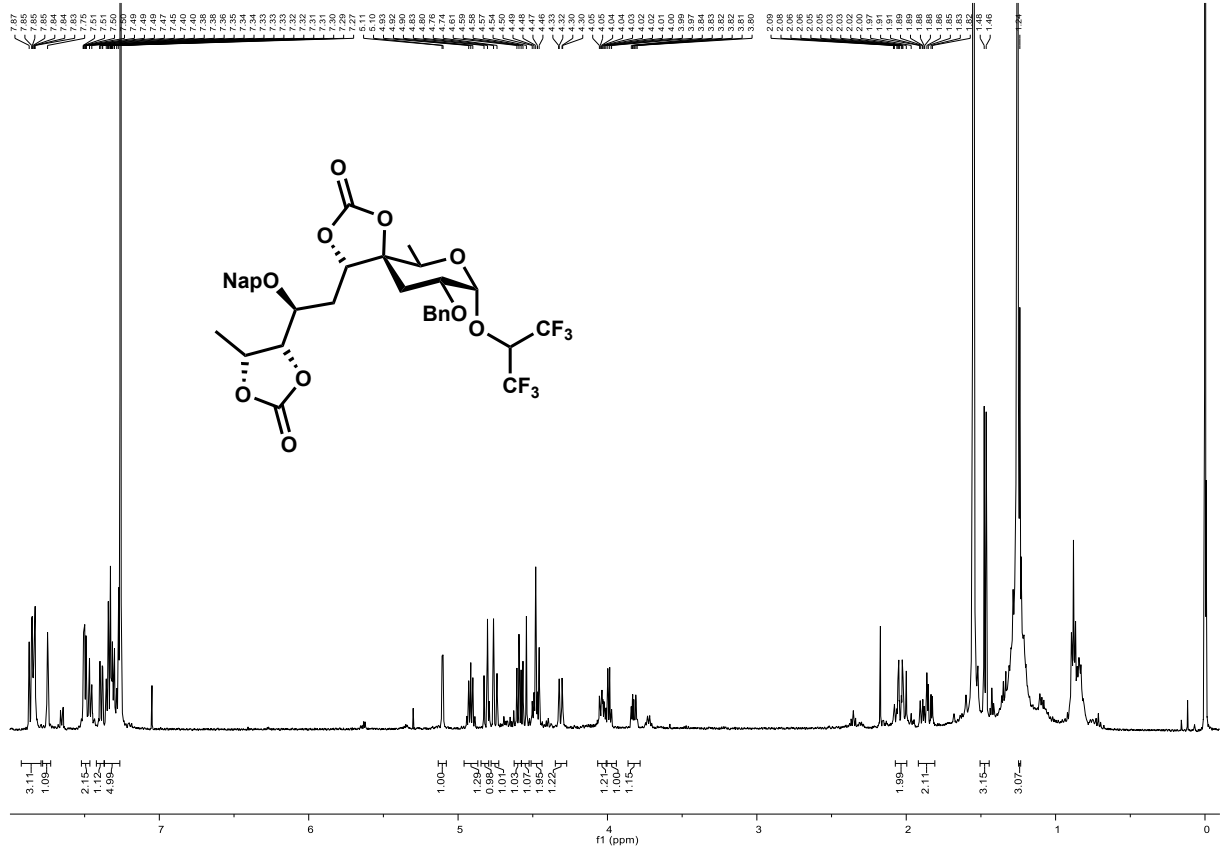

<sup>13</sup>C NMR, 126 MHz, CDCl<sub>3</sub> of **S56**

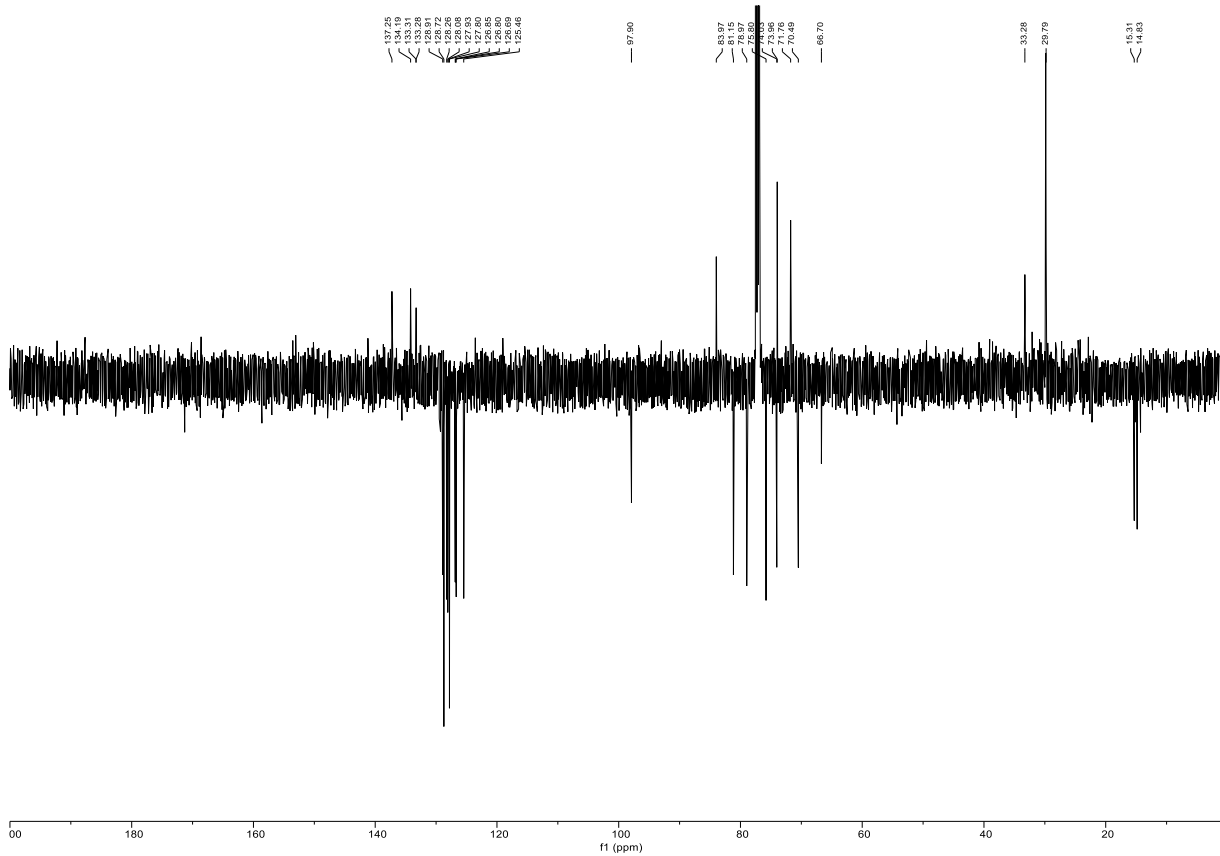

HH-COSY NMR, CDCl<sub>3</sub> of S56

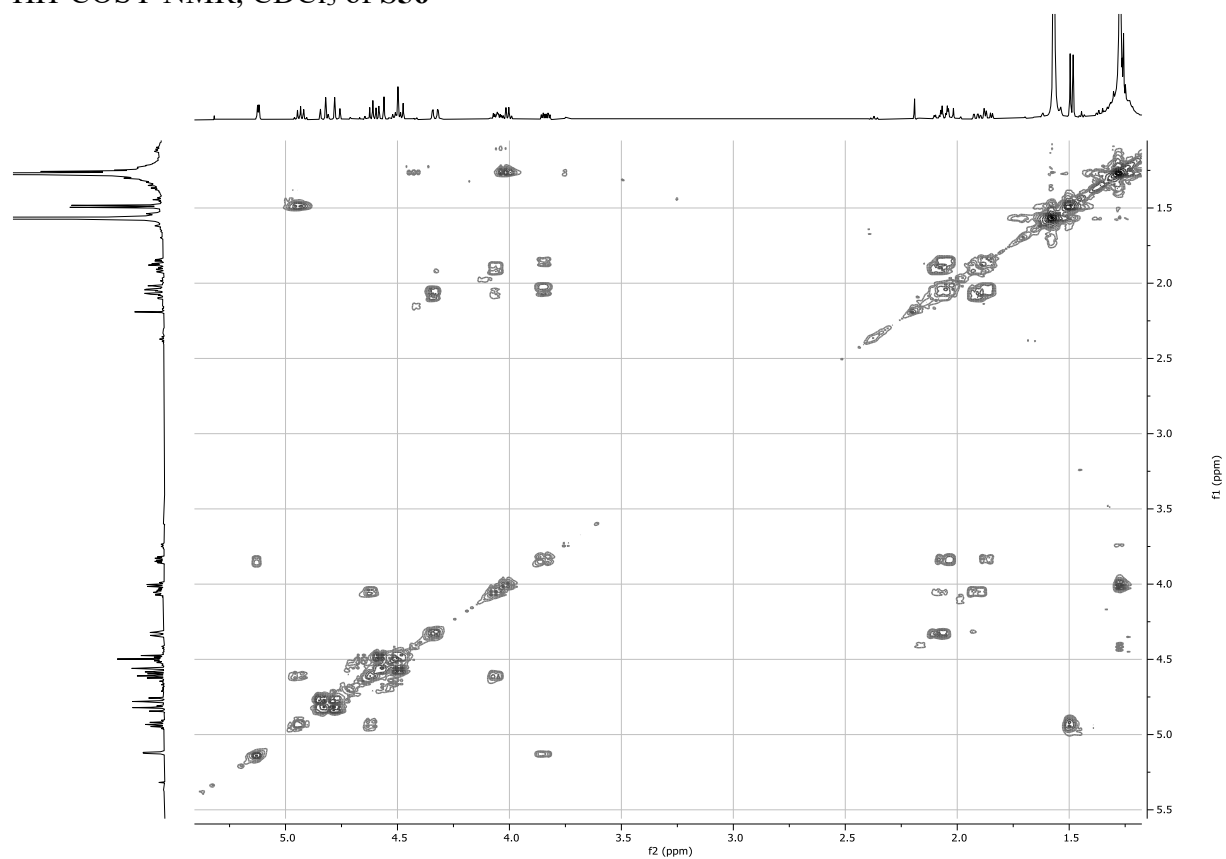

HSQC NMR, CDCl<sub>3</sub> of S56

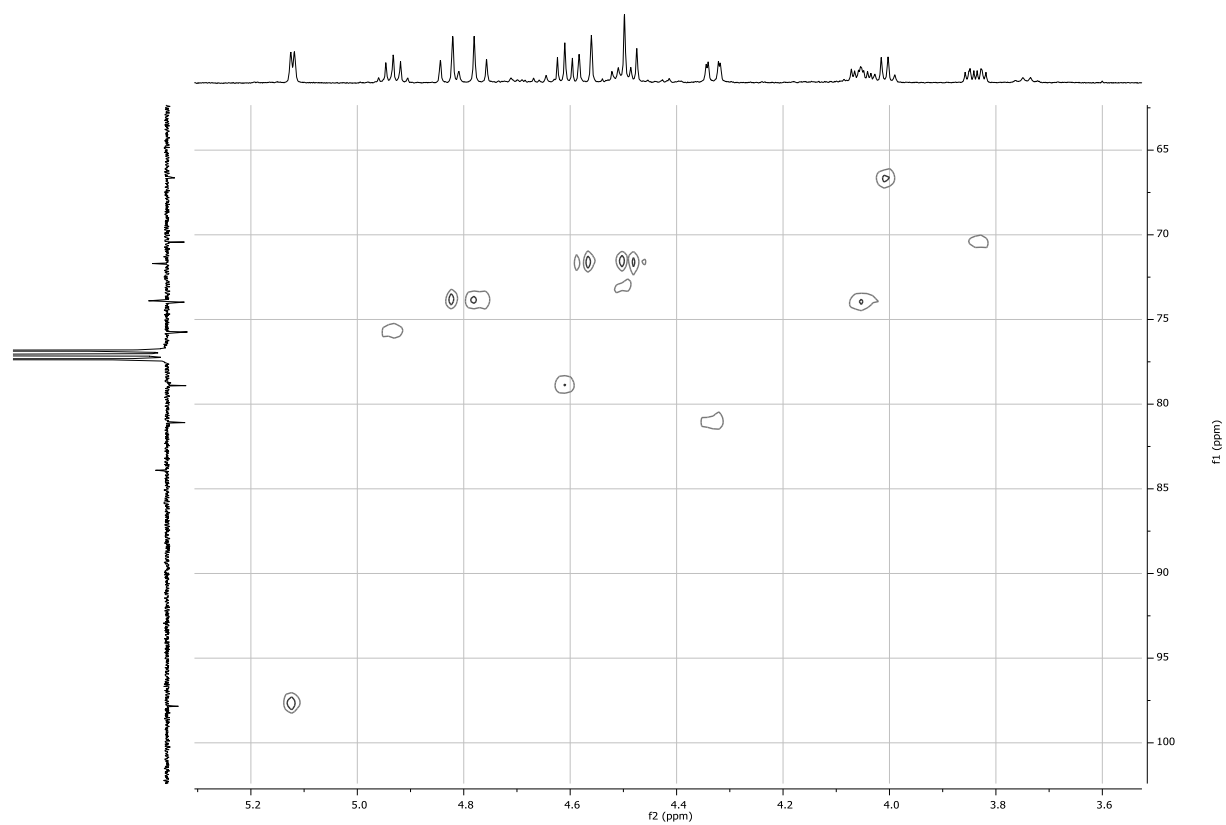

<sup>1</sup>H NMR, 500 MHz, CDCl<sub>3</sub> of S57

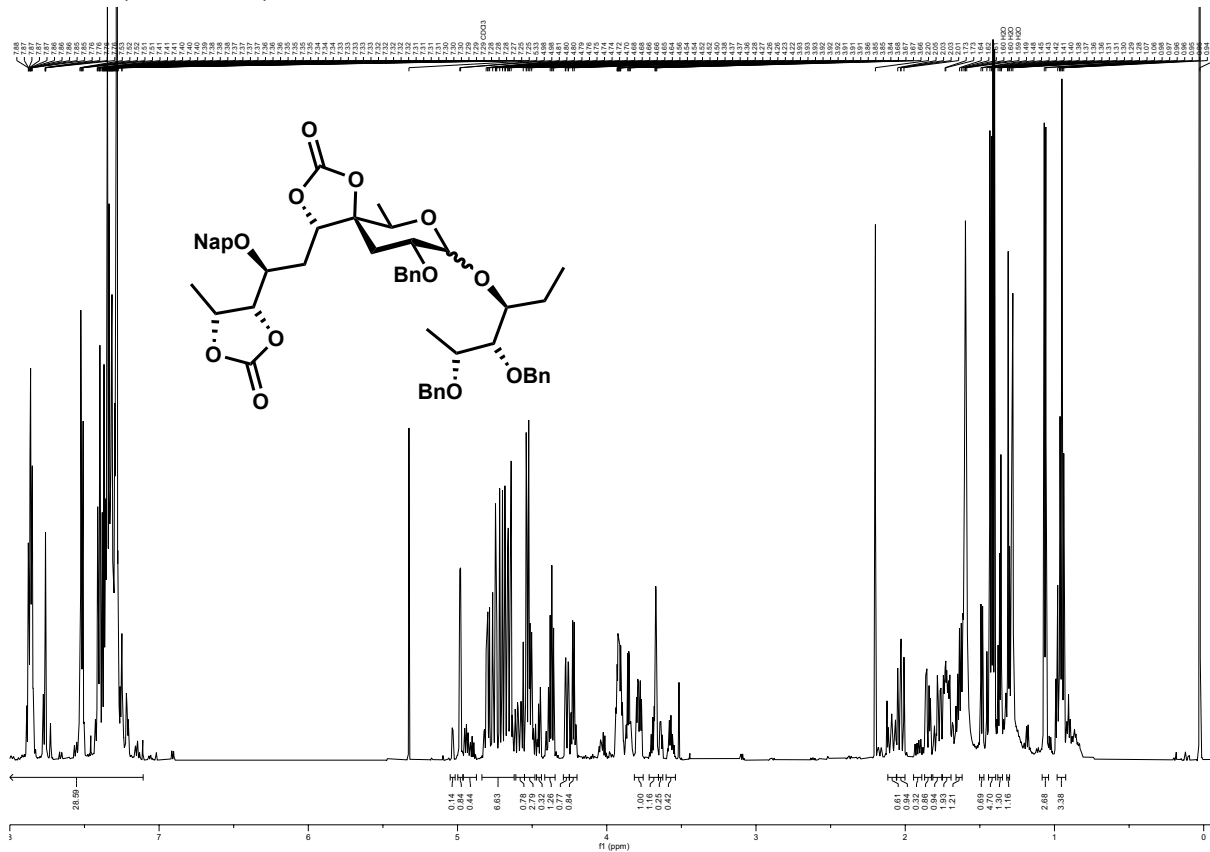

HH-COSY NMR, CDCl<sub>3</sub> of S57

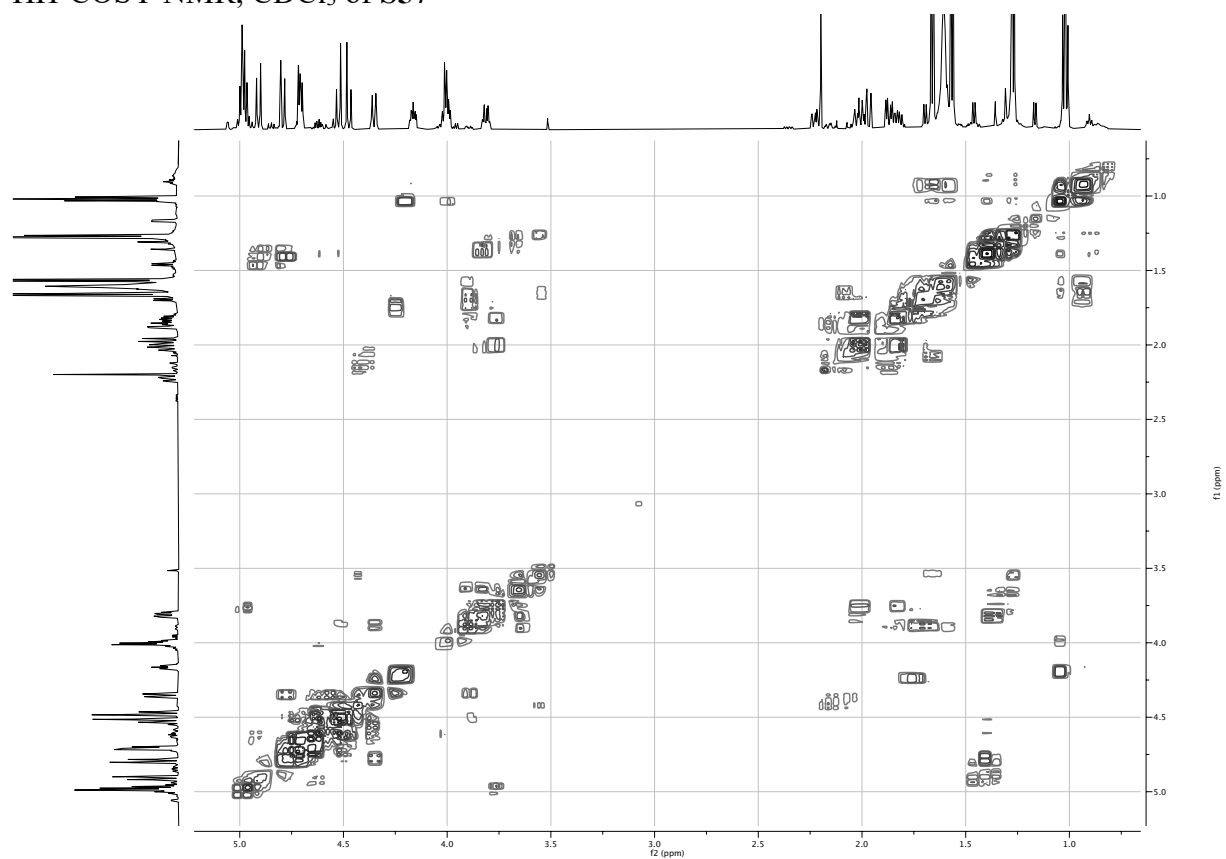

HSQC NMR, CDCl<sub>3</sub> of S57

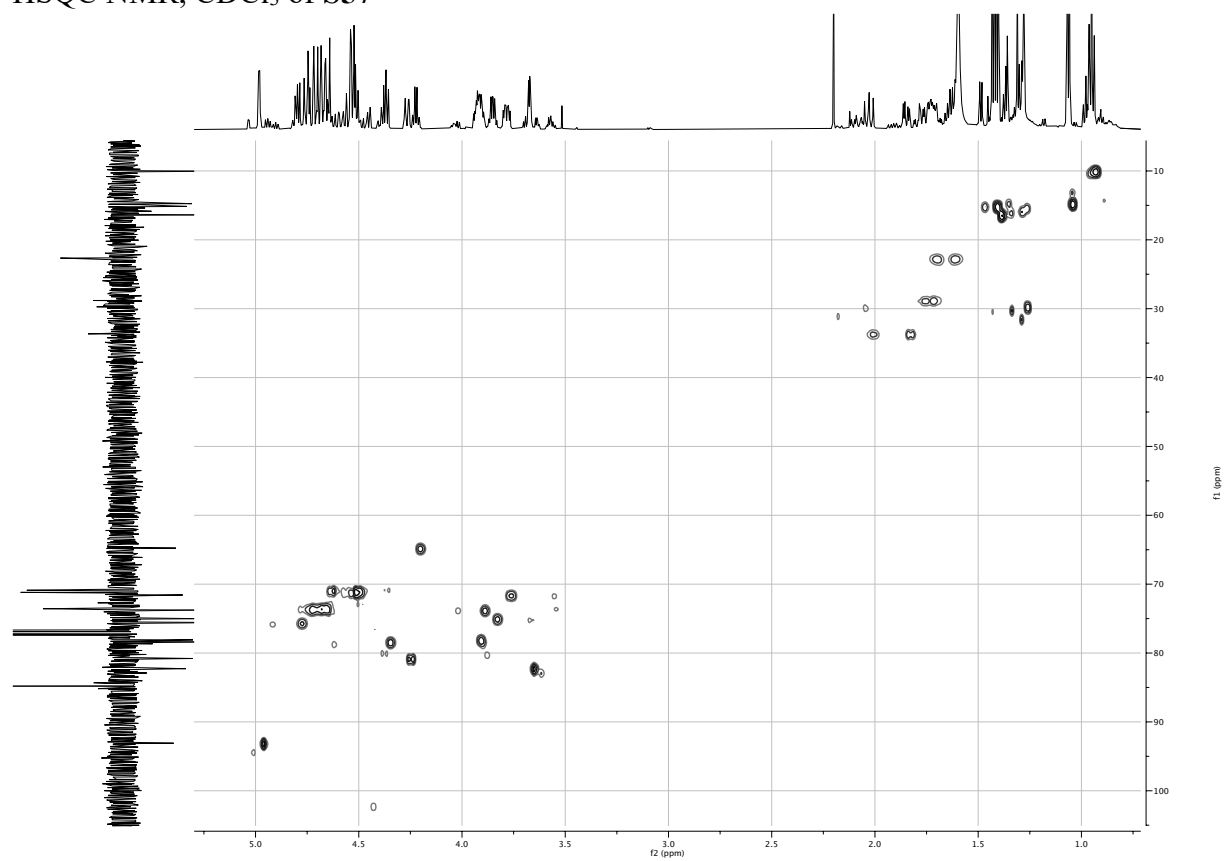



HH-COSY NMR, CDCl<sub>3</sub> of S58

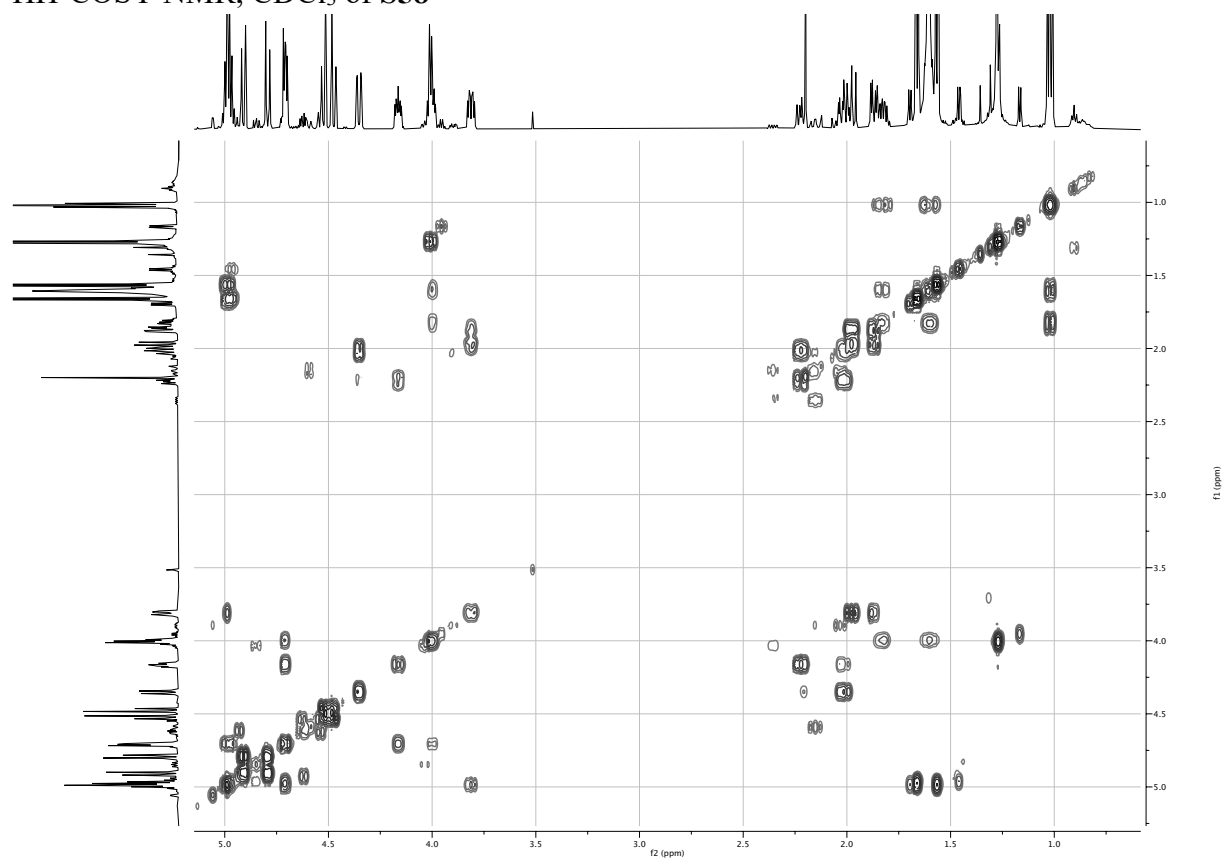

HSQC NMR, CDCl<sub>3</sub> of S58

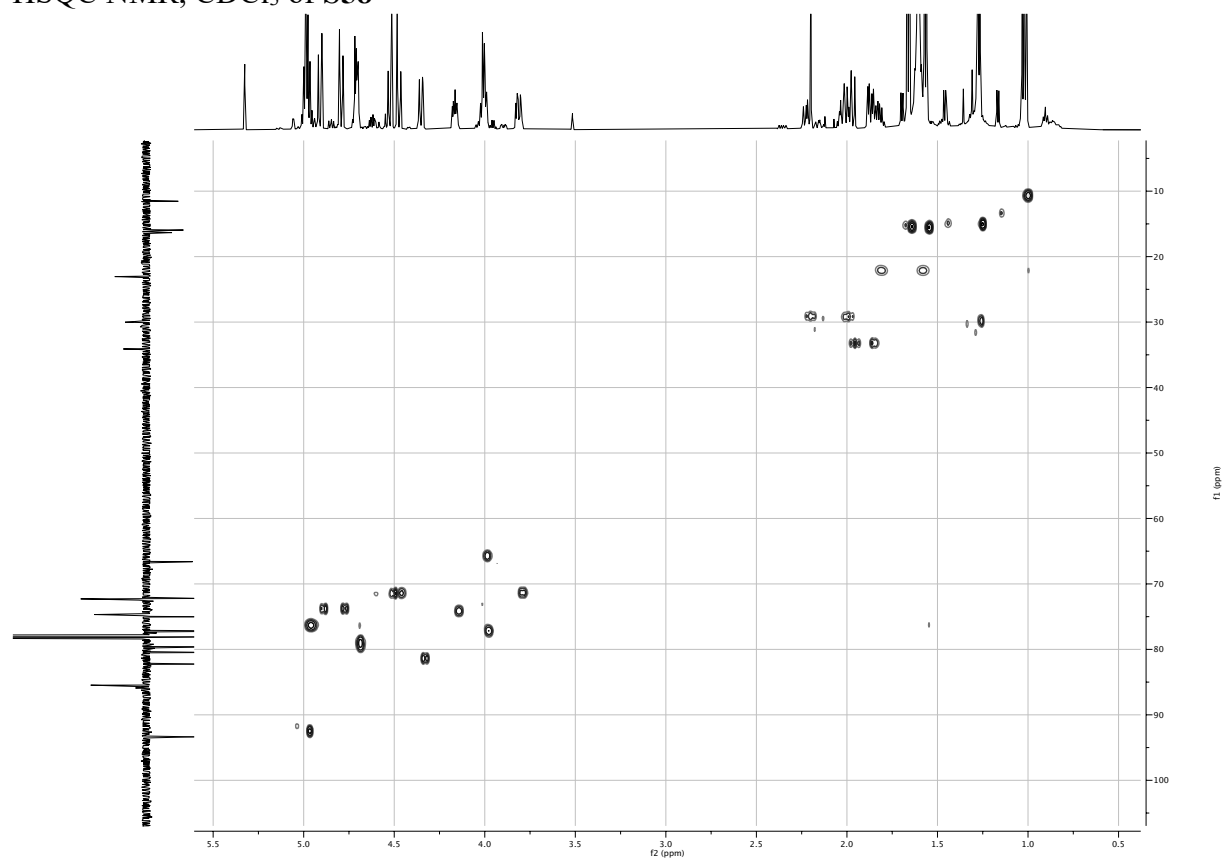



# <sup>1</sup>H NMR, 400 MHz, CDCl<sub>3</sub> of S60

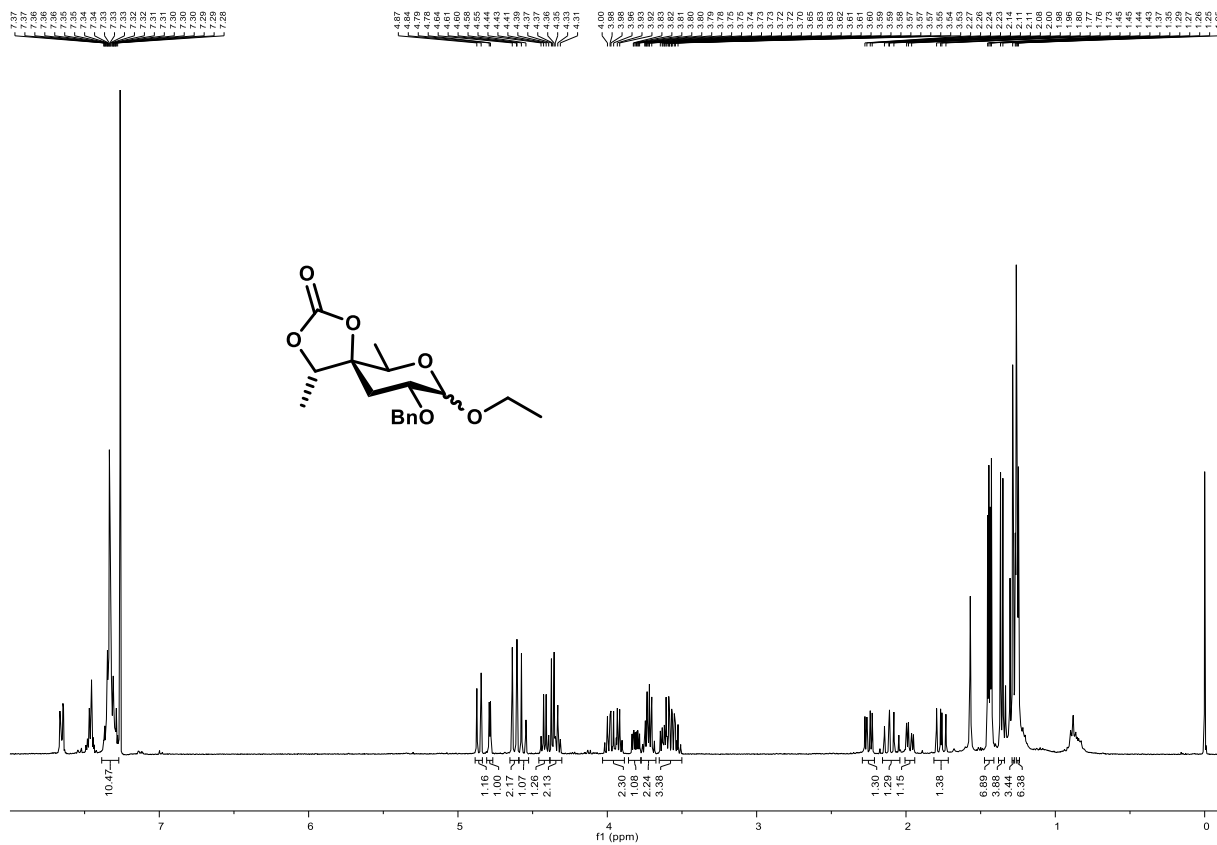

# <sup>13</sup>C NMR, 101 MHz, CDCl<sub>3</sub> of S60

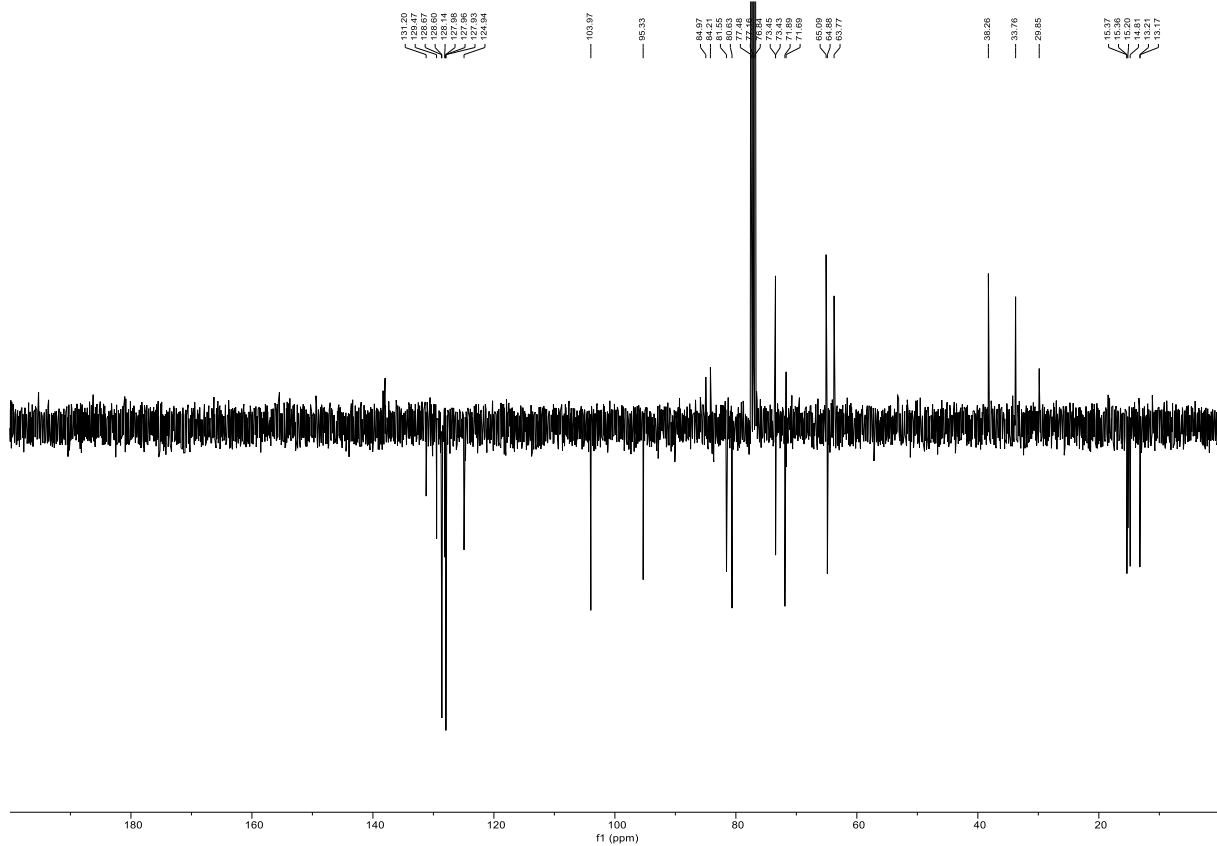

HH-COSY NMR, CDCl<sub>3</sub> of S60

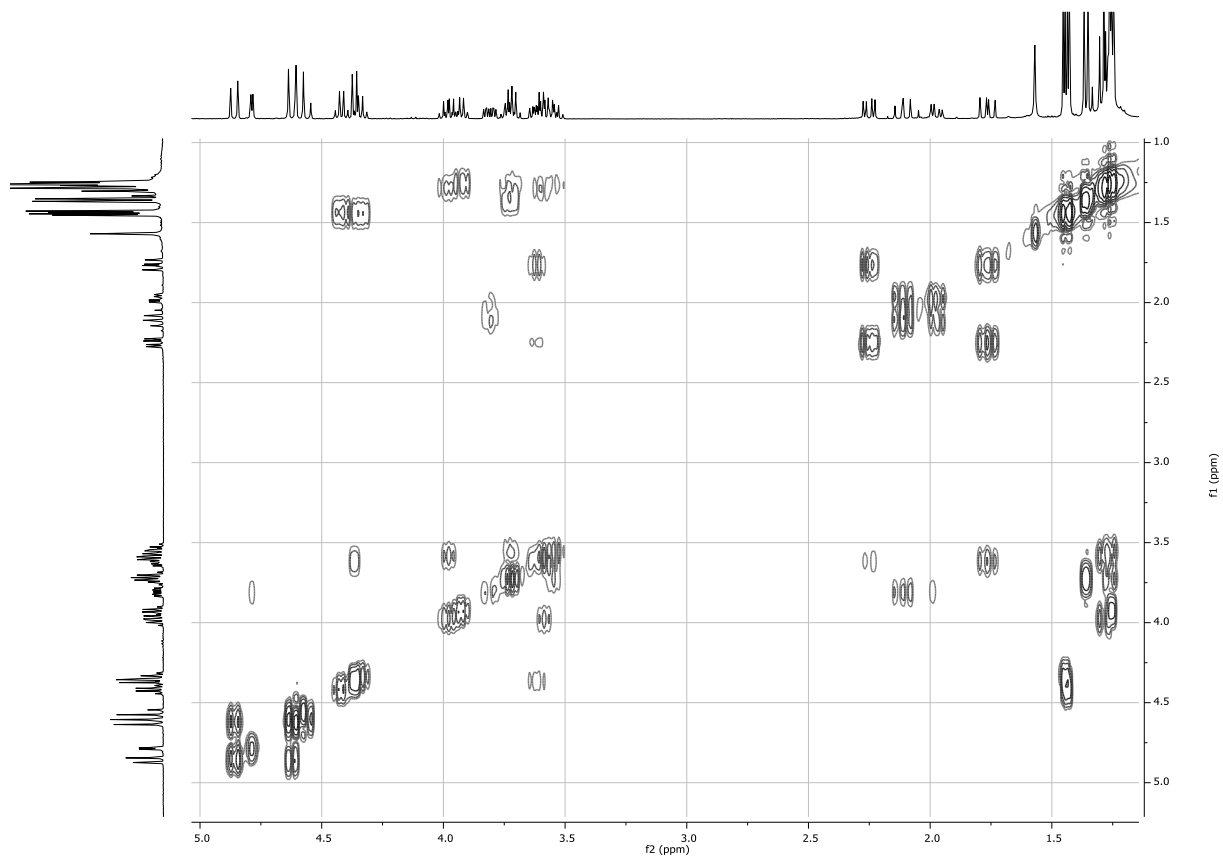

HSQC NMR, CDCl<sub>3</sub> of S60

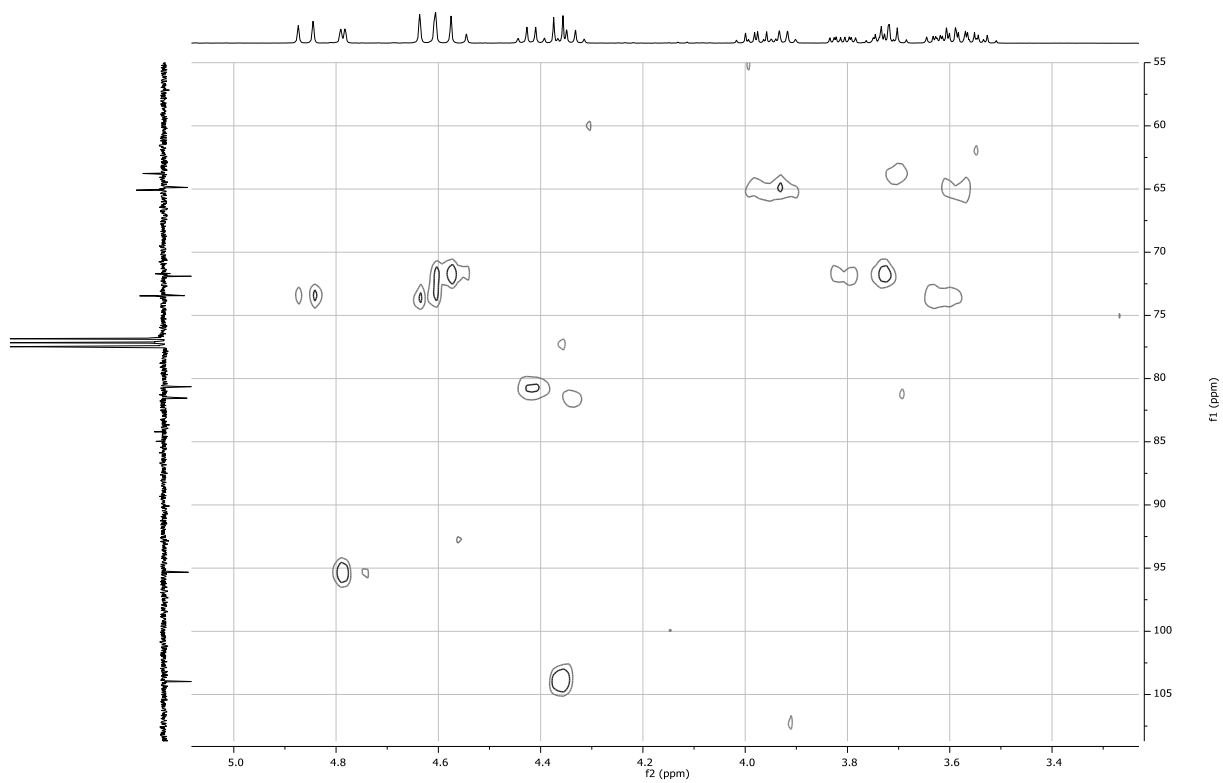

<sup>1</sup>H NMR, 400 MHz, CDCl<sub>3</sub> of **S61**

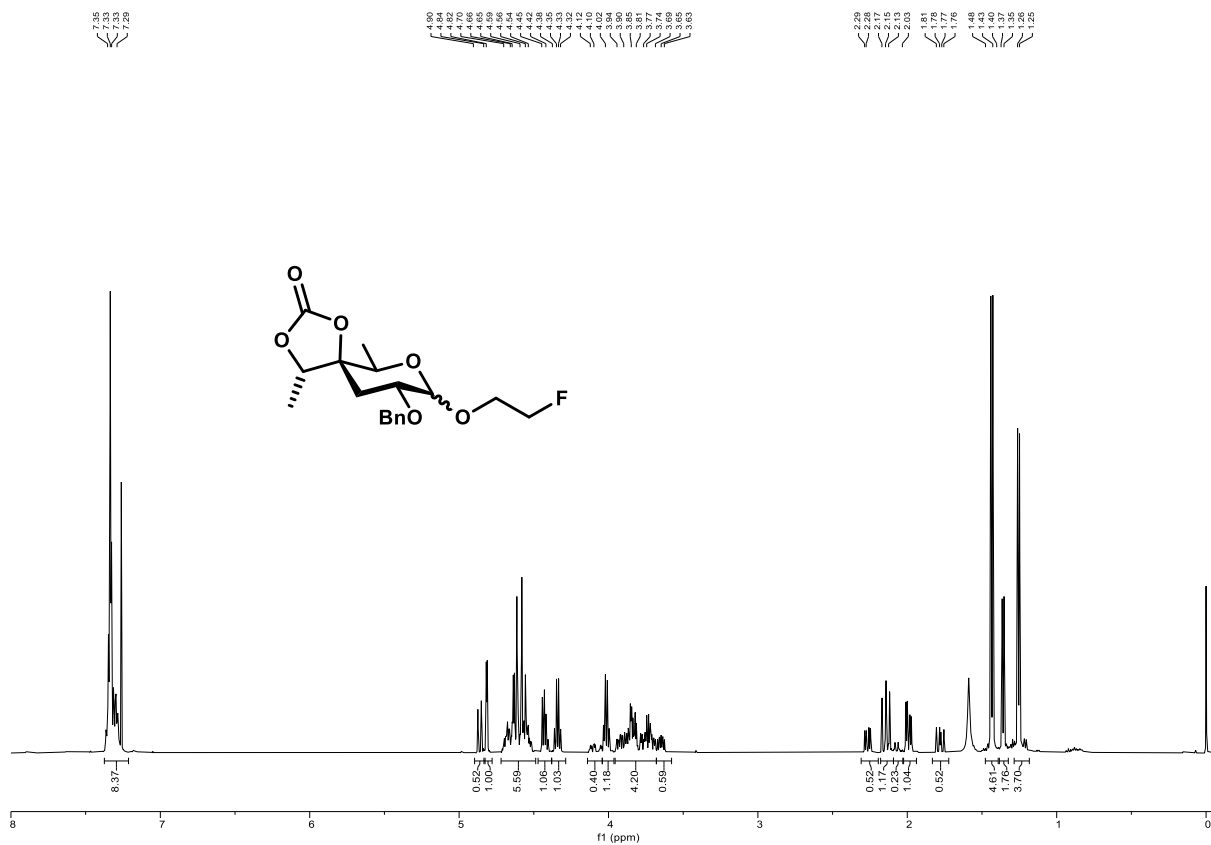

<sup>13</sup>C NMR, 101 MHz, CDCl<sub>3</sub> of **S61**

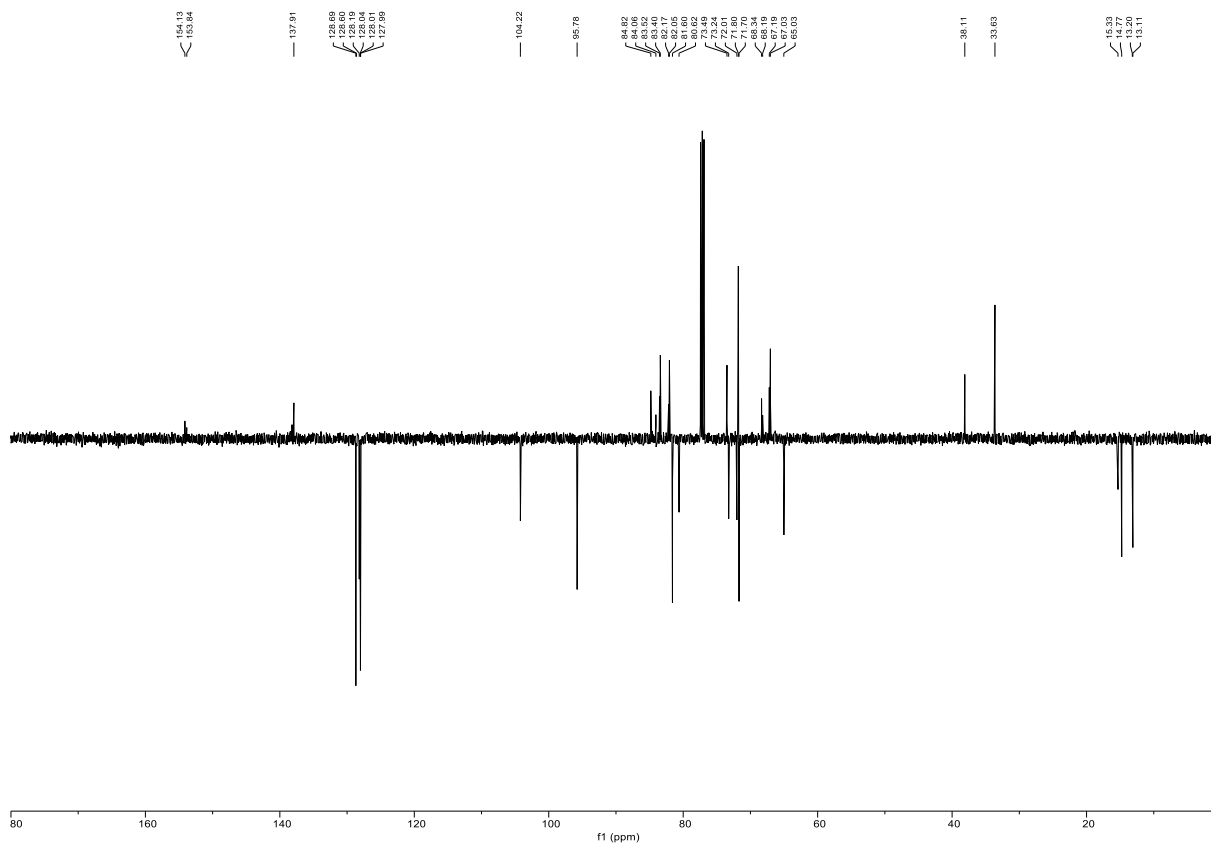

HH-COSY NMR, CDCl<sub>3</sub> of S61

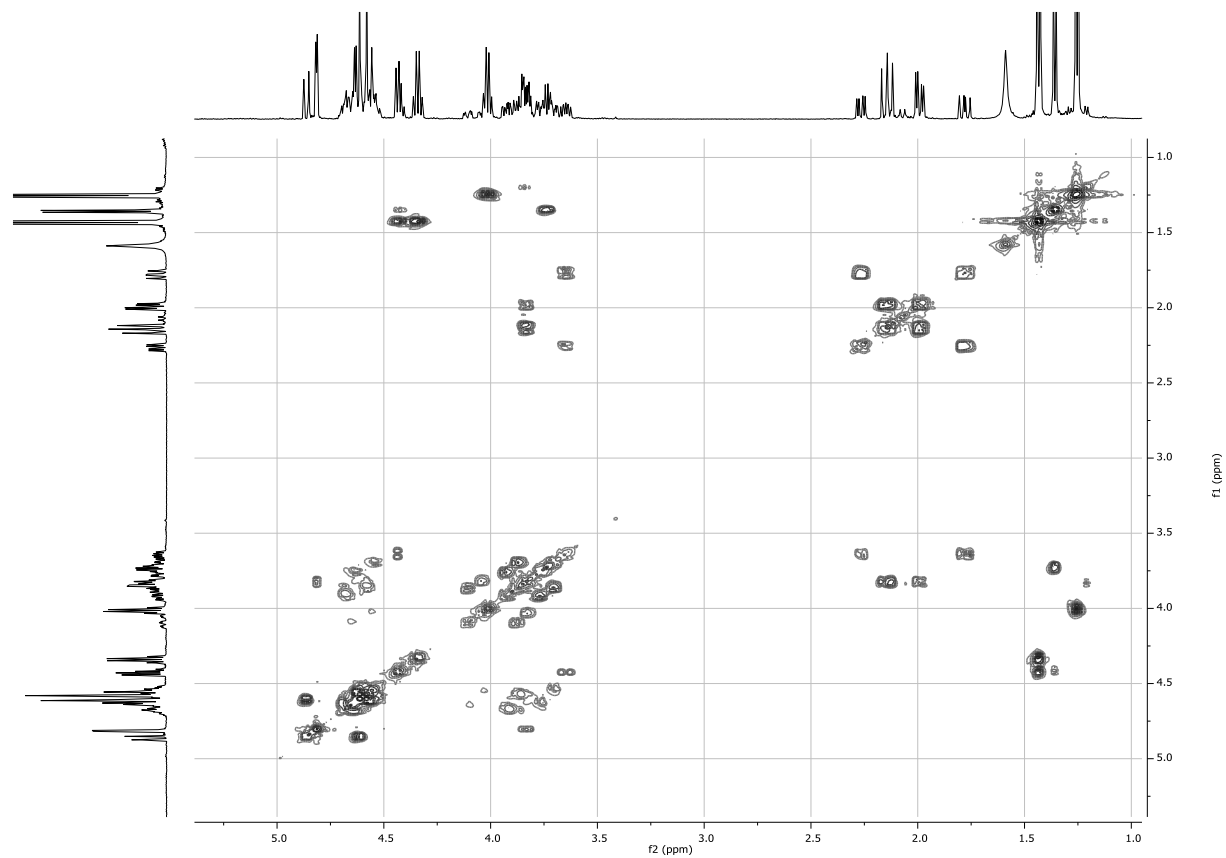

HSQC NMR, CDCl<sub>3</sub> of S61

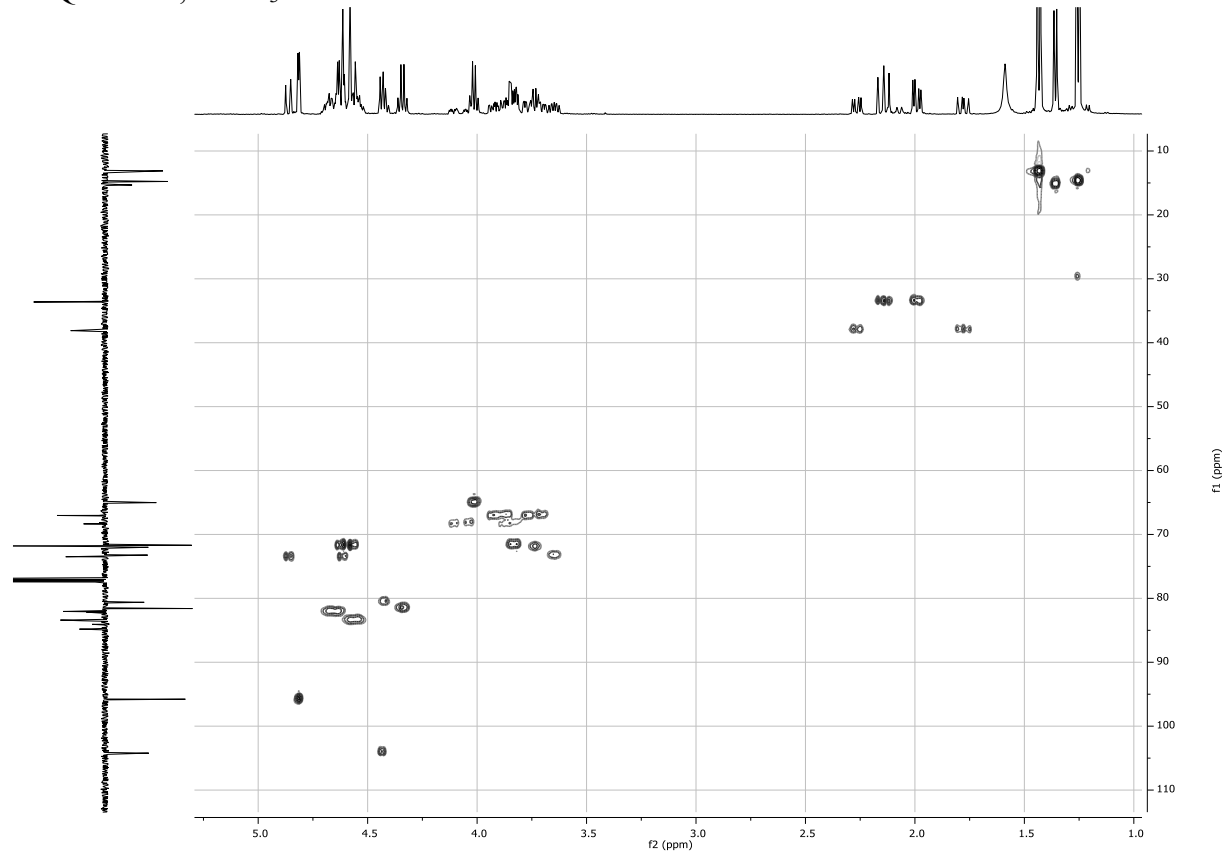

$^1\text{H}$  NMR, 400 MHz,  $\text{CDCl}_3$  of **S62**

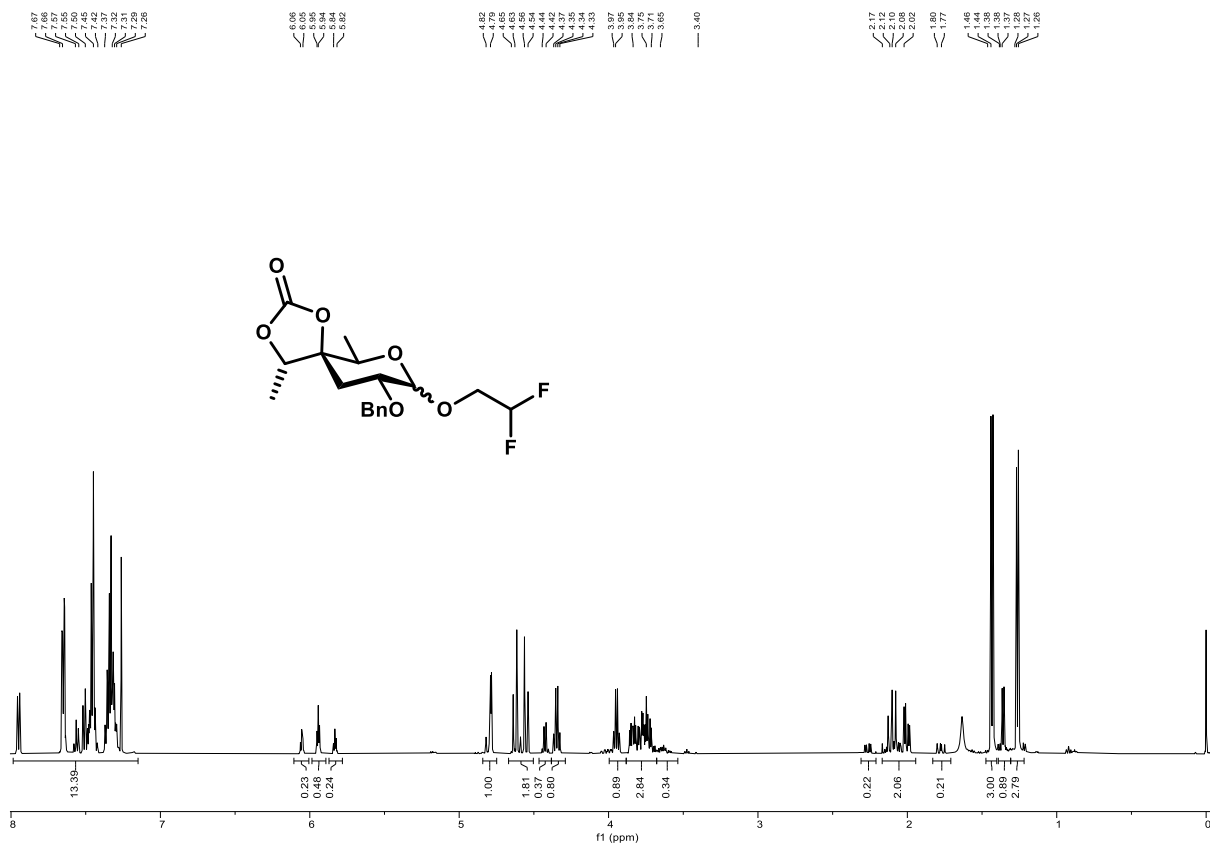

$^{13}\text{C}$  NMR, 101 MHz,  $\text{CDCl}_3$  of **S62**

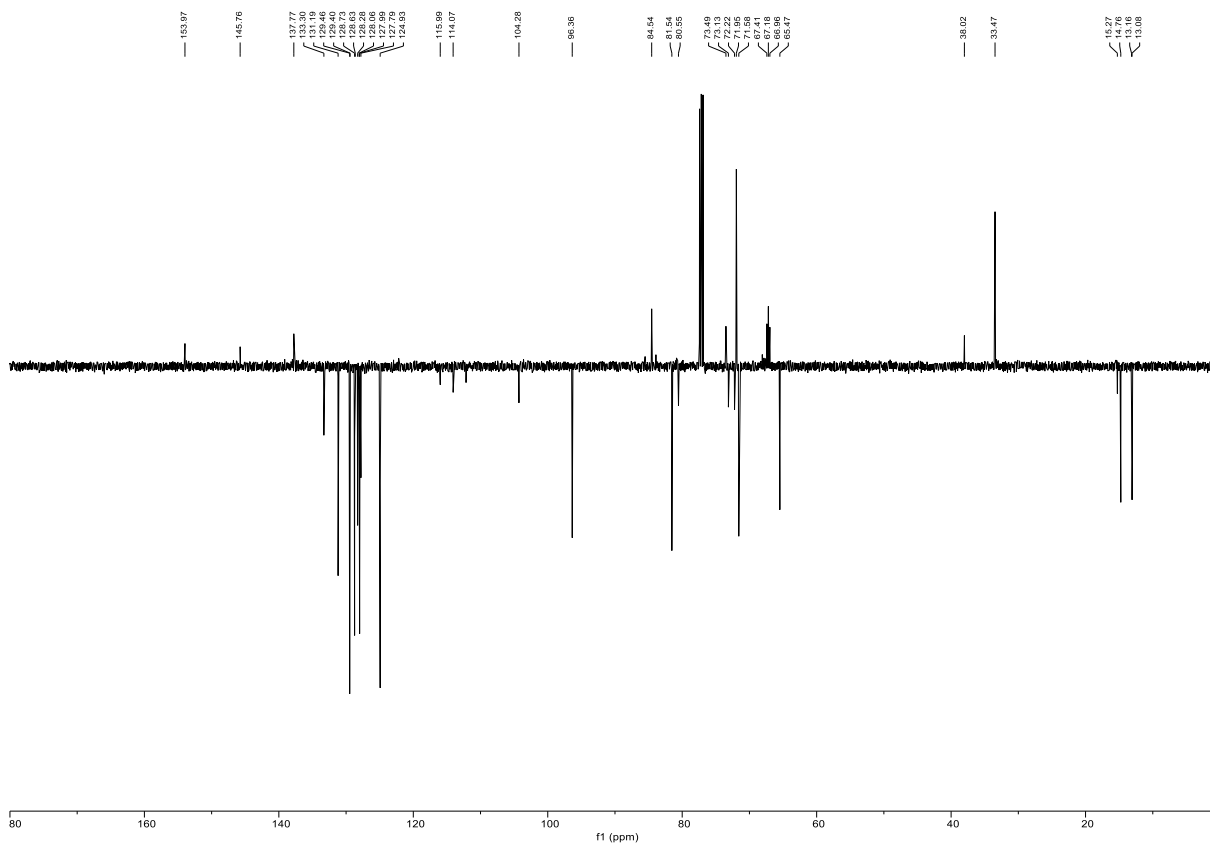

### HH-COSY NMR, CDCl<sub>3</sub> of S62

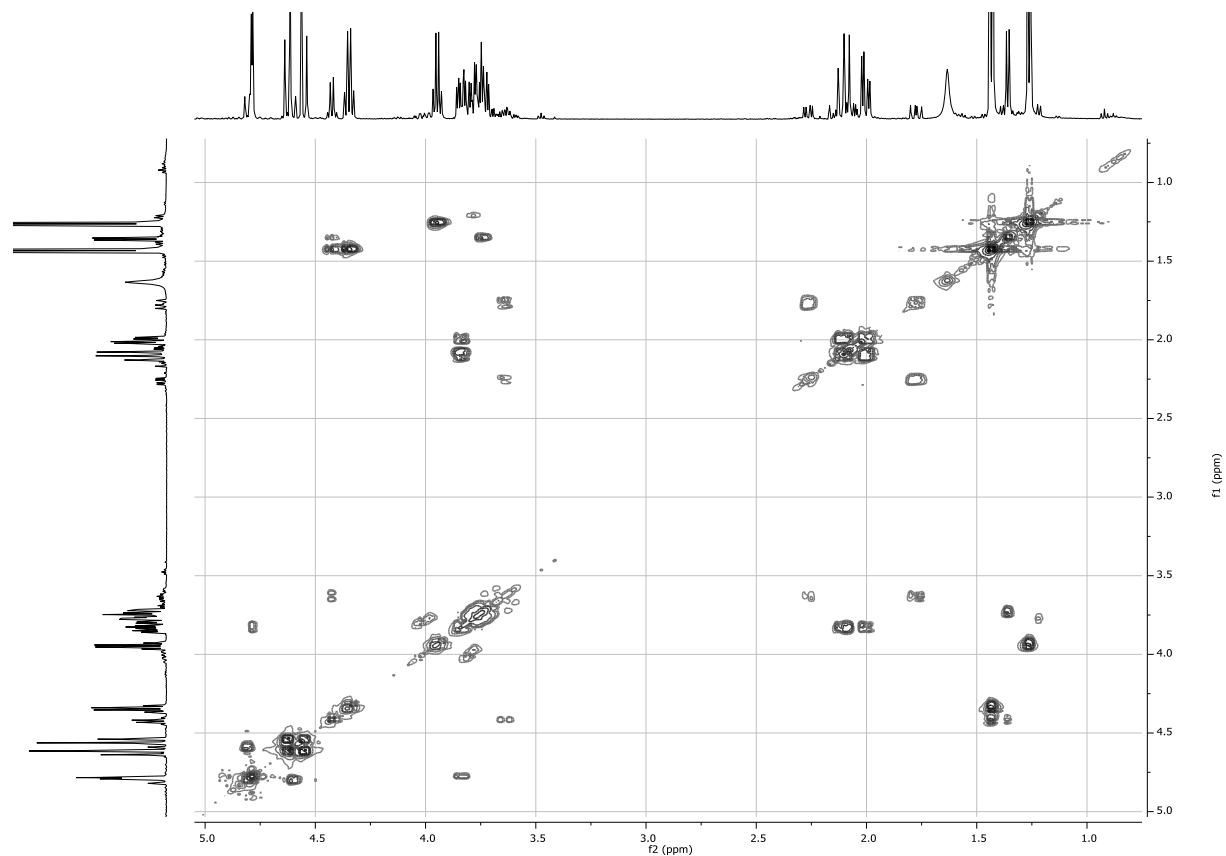

### HSQC NMR, CDCl<sub>3</sub> of S62

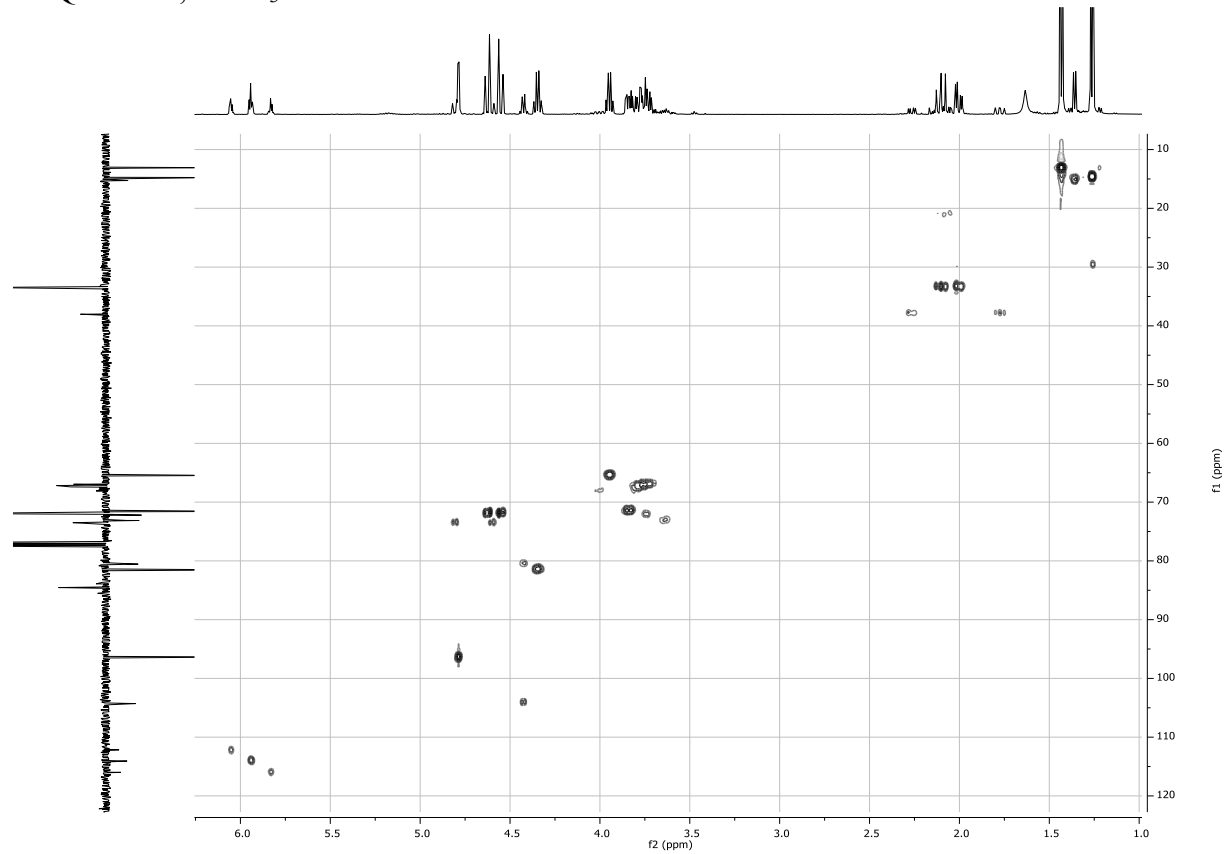

<sup>1</sup>H NMR, 400 MHz, CDCl<sub>3</sub> of S63

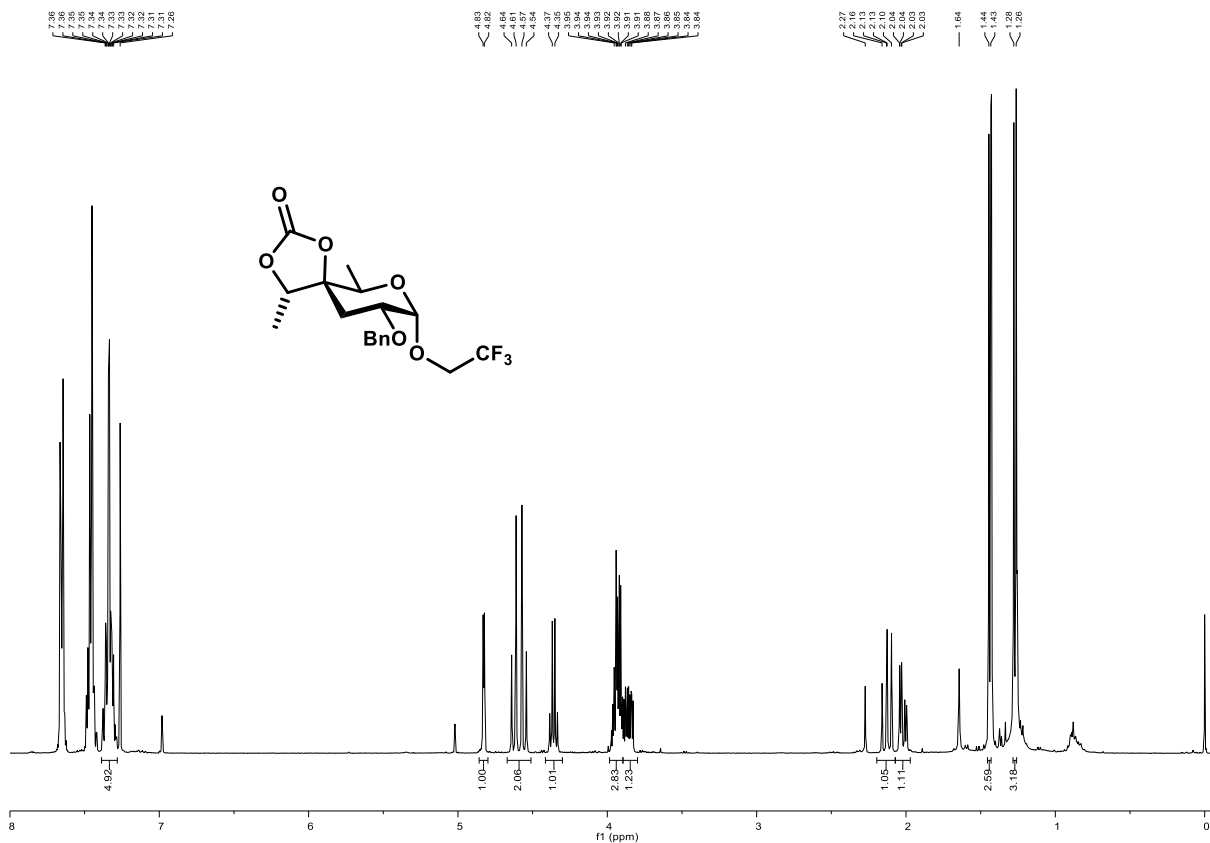

<sup>13</sup>C NMR, 101 MHz, CDCl<sub>3</sub> of S63

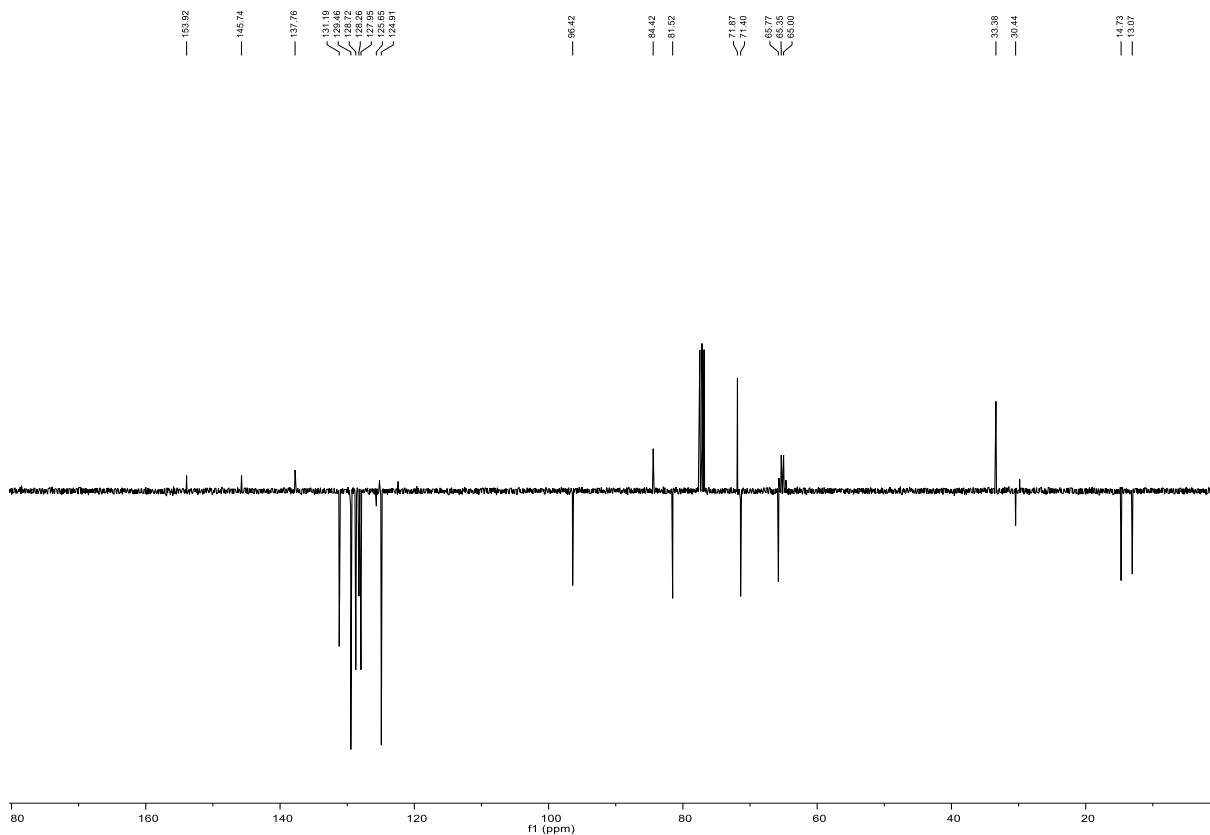

HH-COSY NMR, CDCl<sub>3</sub> of S63

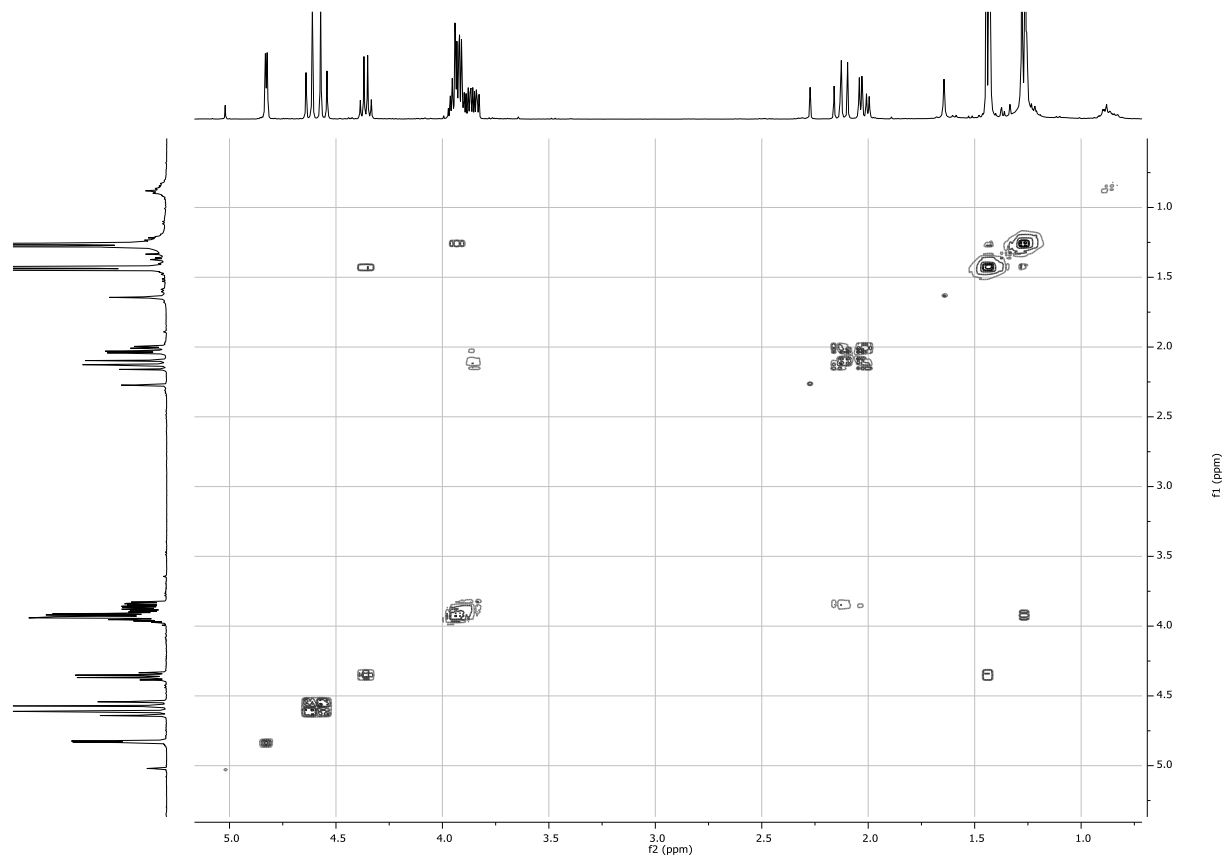

HSQC NMR, CDCl<sub>3</sub> of S63

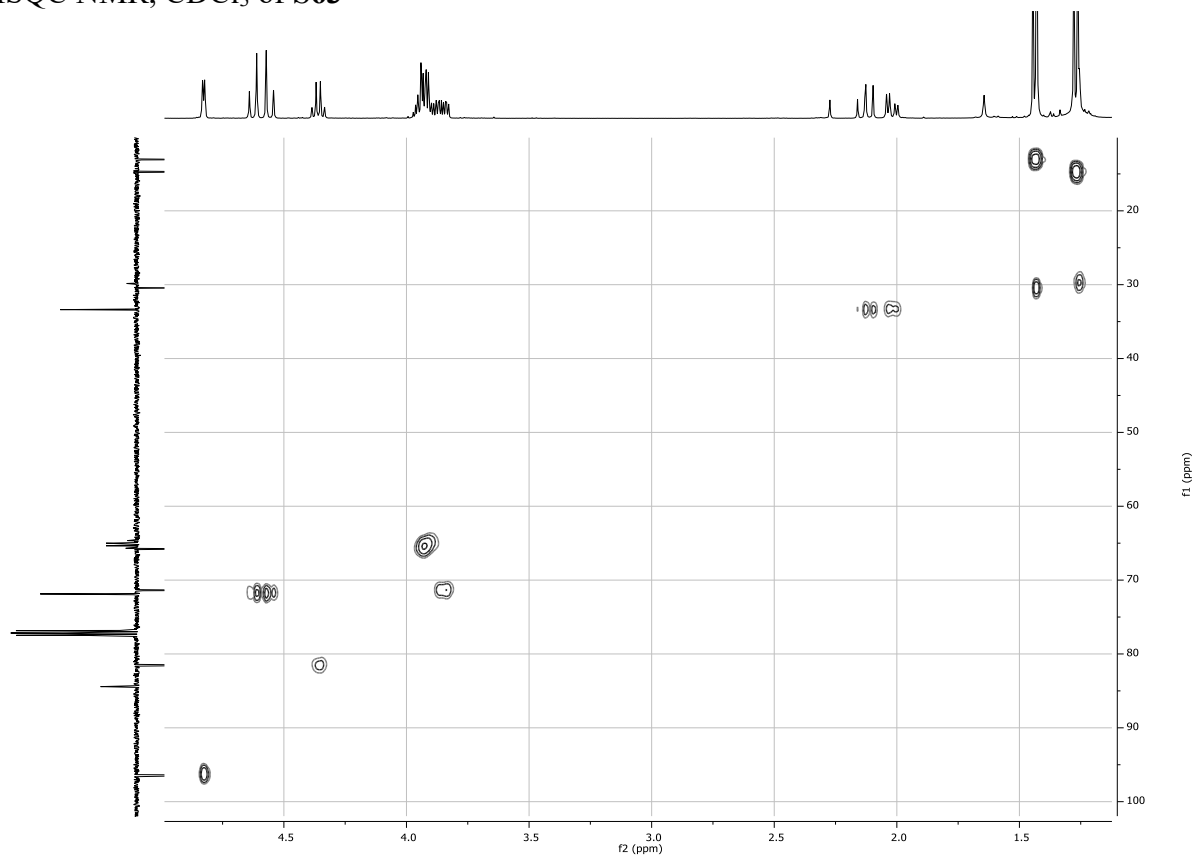



<sup>1</sup>H NMR, 500 MHz, CDCl<sub>3</sub> of **S59**

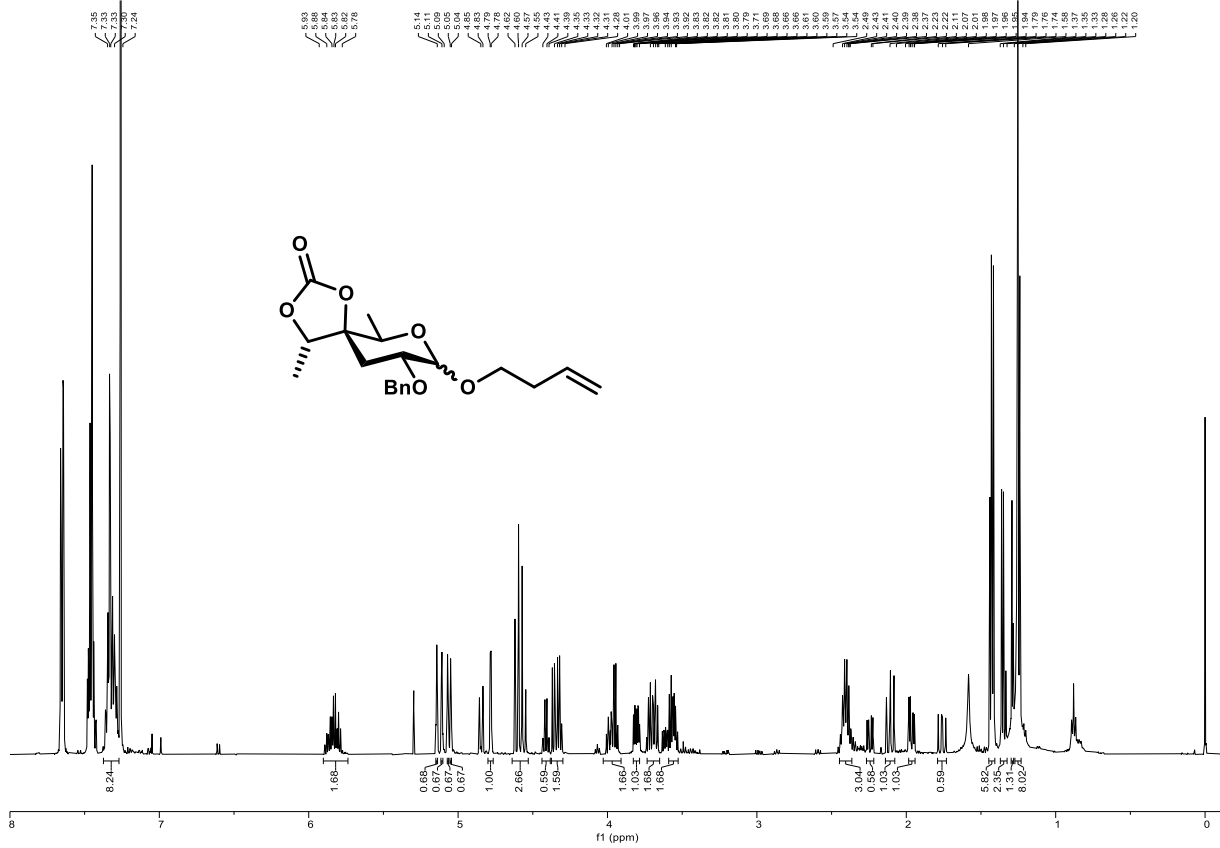

<sup>13</sup>C NMR, 125 MHz, CDCl<sub>3</sub> of **S59**

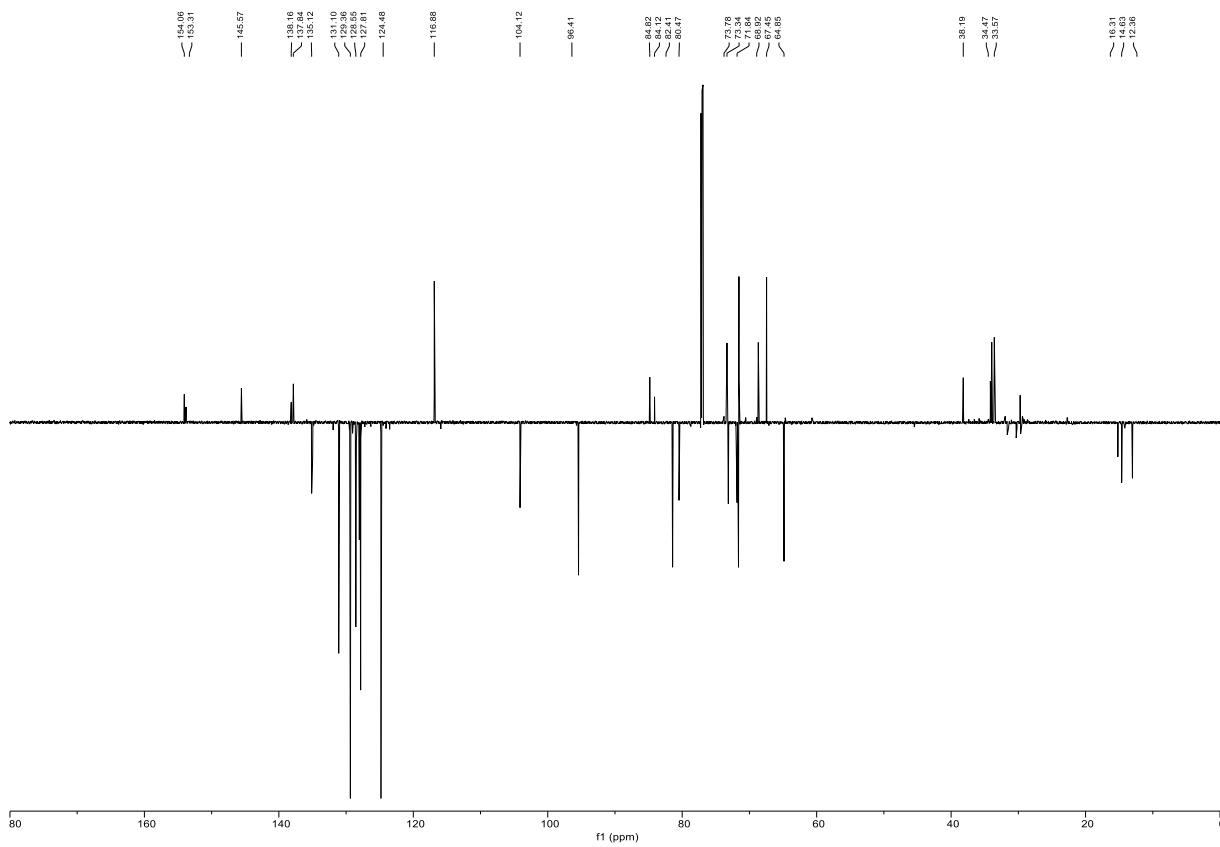

HH-COSY NMR, CDCl<sub>3</sub> of S59

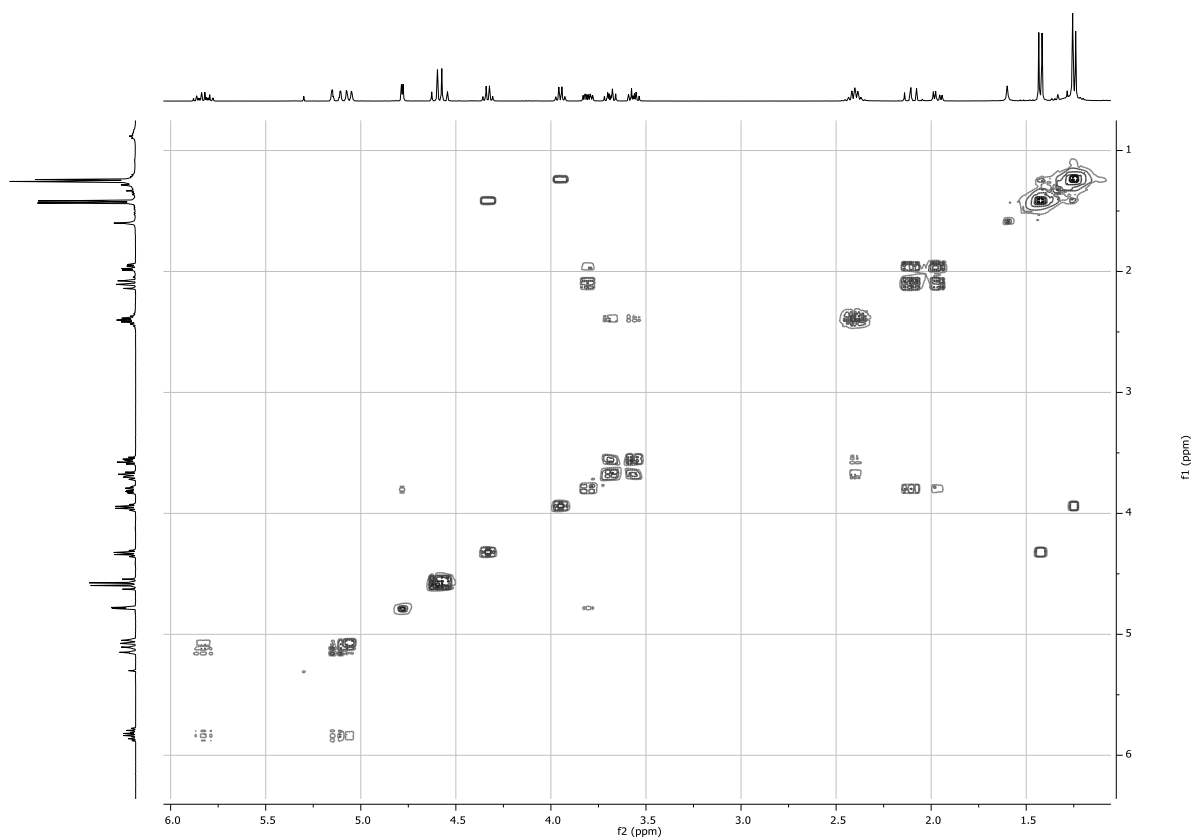

HSQC NMR, CDCl<sub>3</sub> of S59

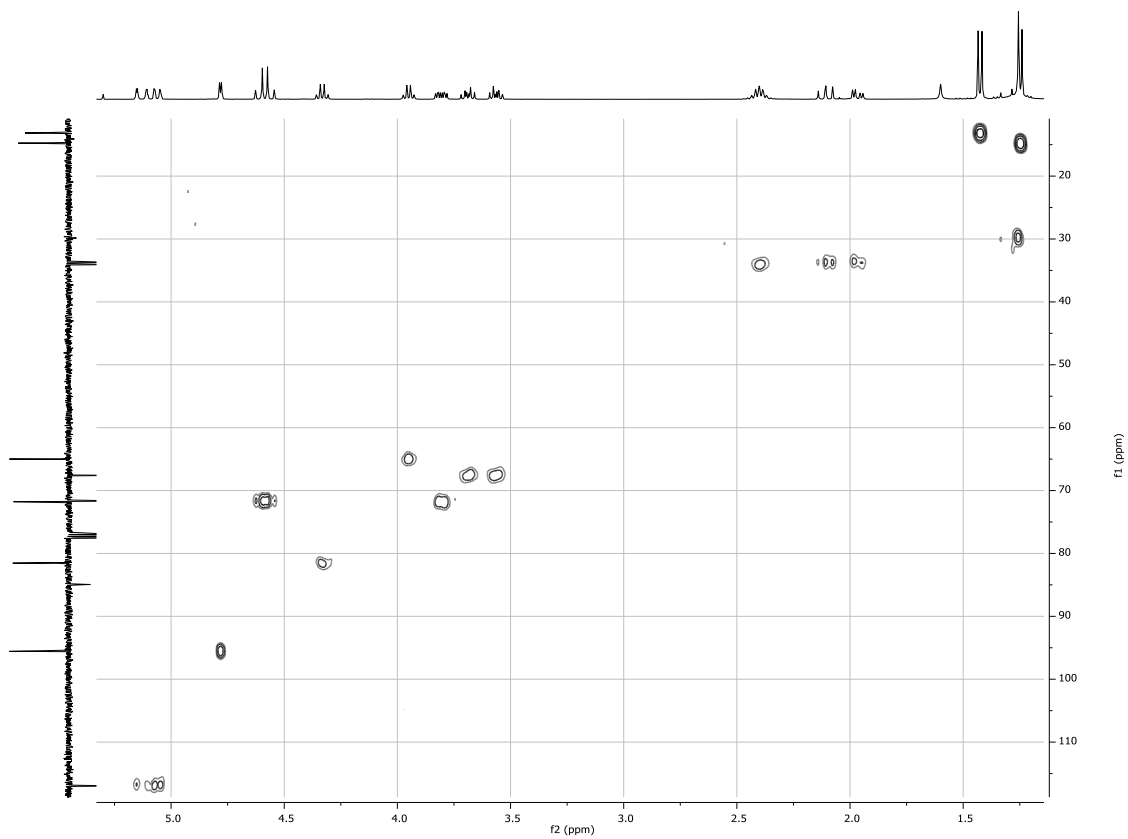



HH-COSY NMR, CDCl<sub>3</sub> of S64

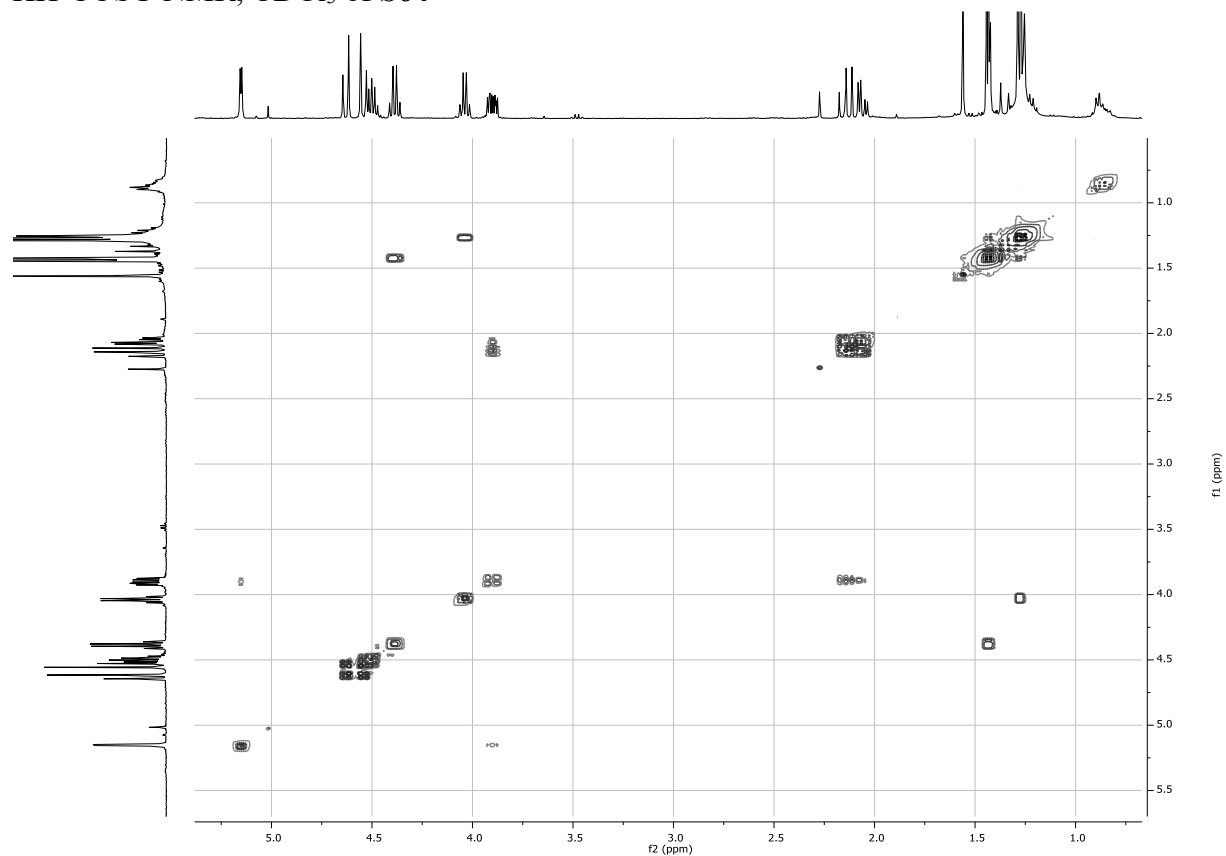

HSQC NMR, CDCl<sub>3</sub> of S64

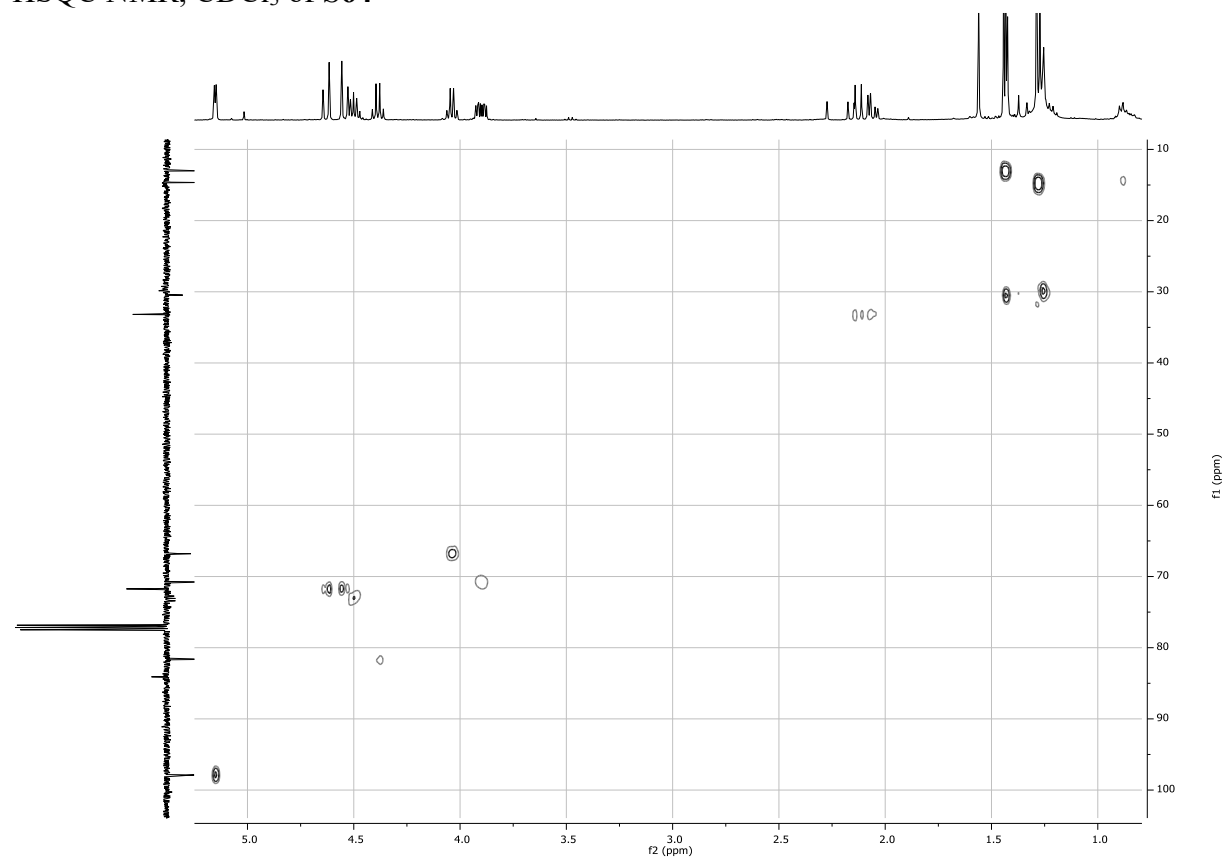

$^1\text{H}$  NMR, 400 MHz,  $\text{CDCl}_3$  of **S65**

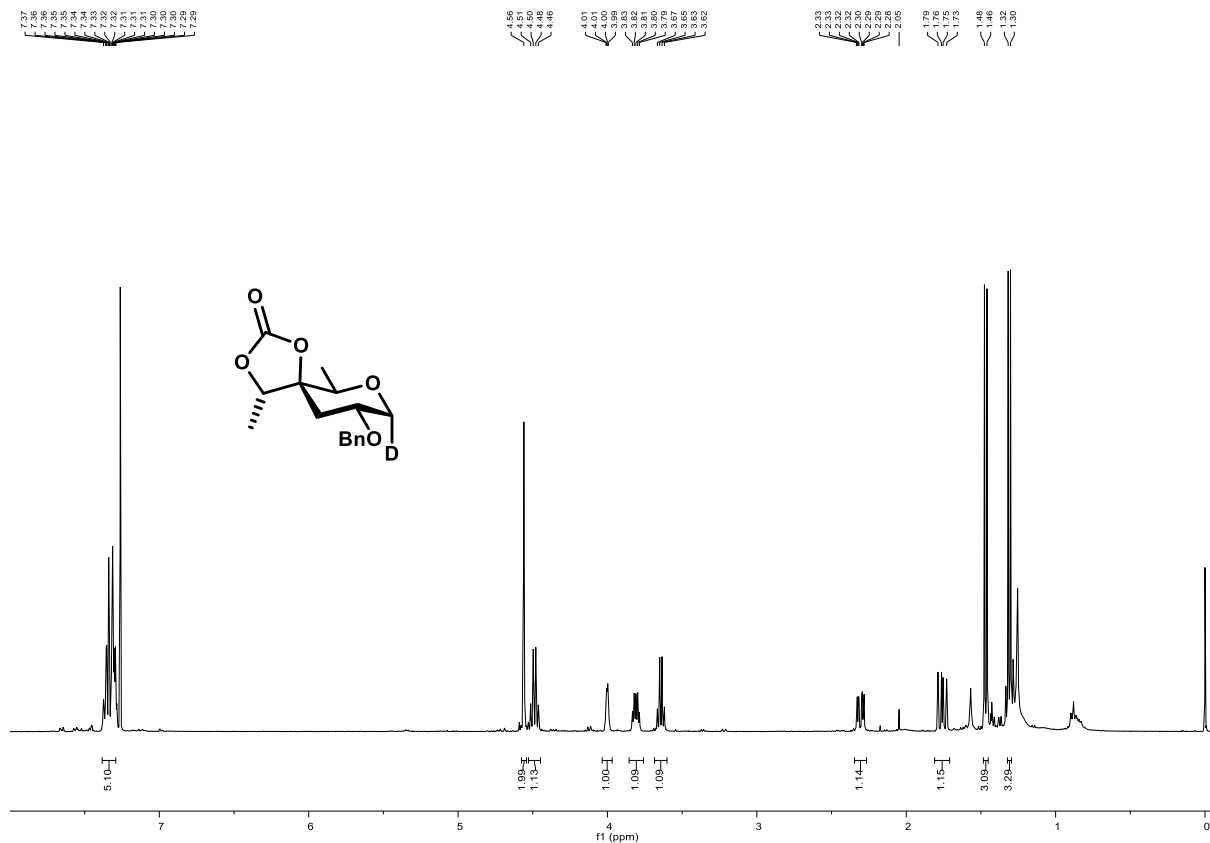

$^{13}\text{C}$  NMR, 101 MHz,  $\text{CDCl}_3$  of **S65**

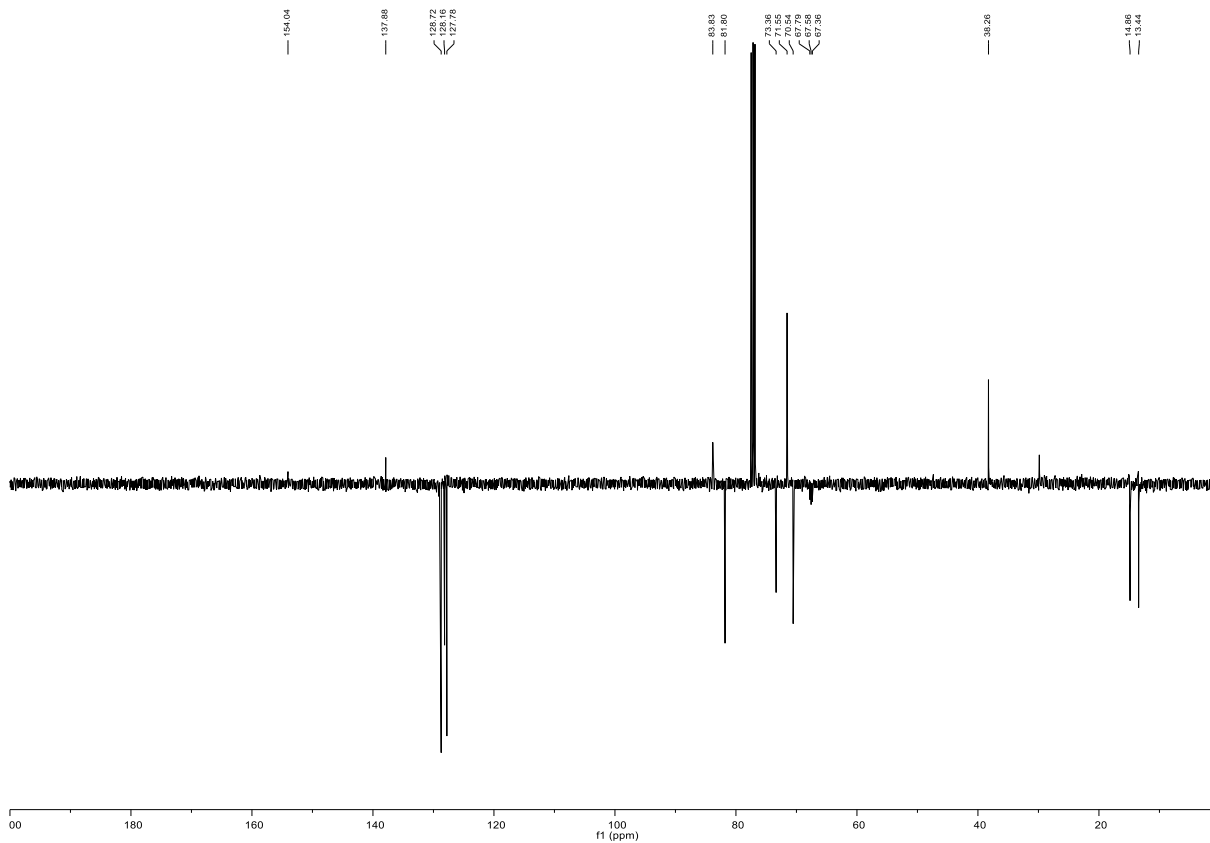

HH-COSY NMR, CDCl<sub>3</sub> of S65

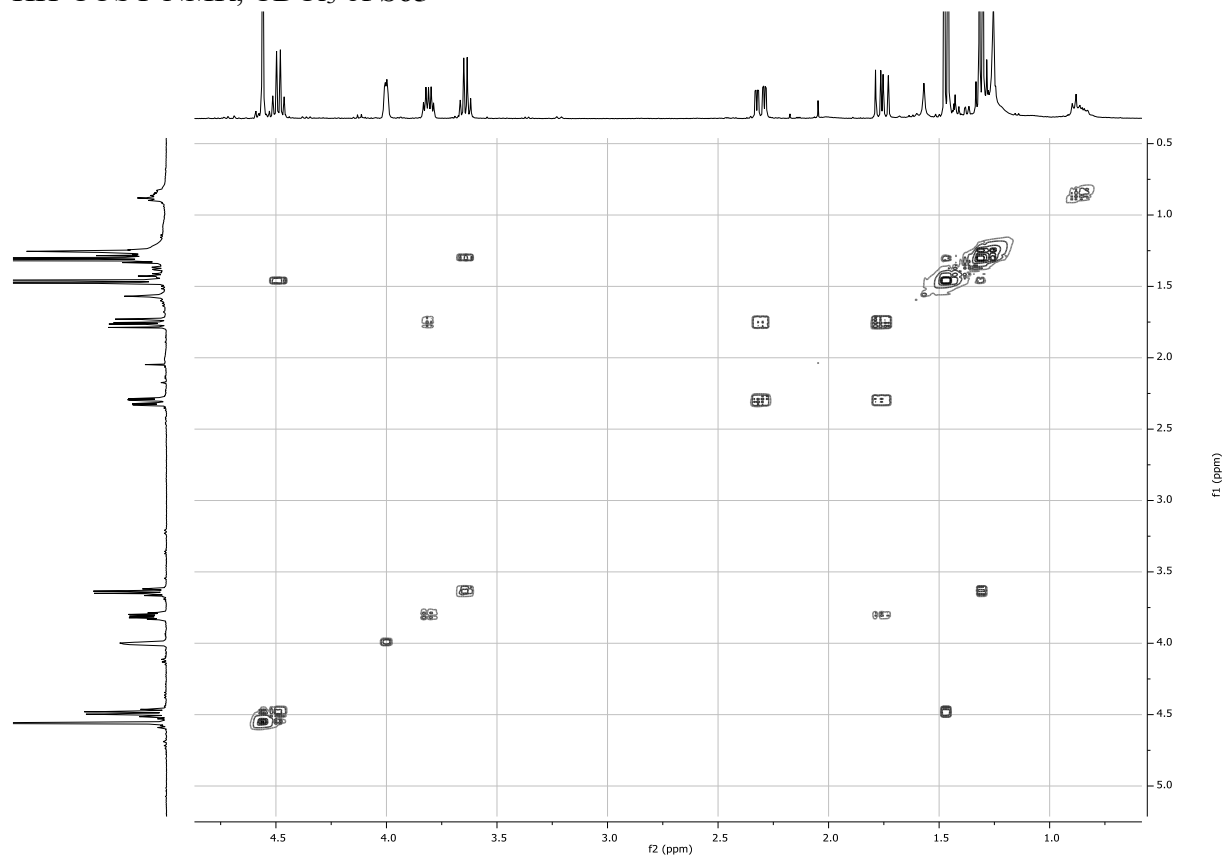

HSQC NMR, CDCl<sub>3</sub> of S65

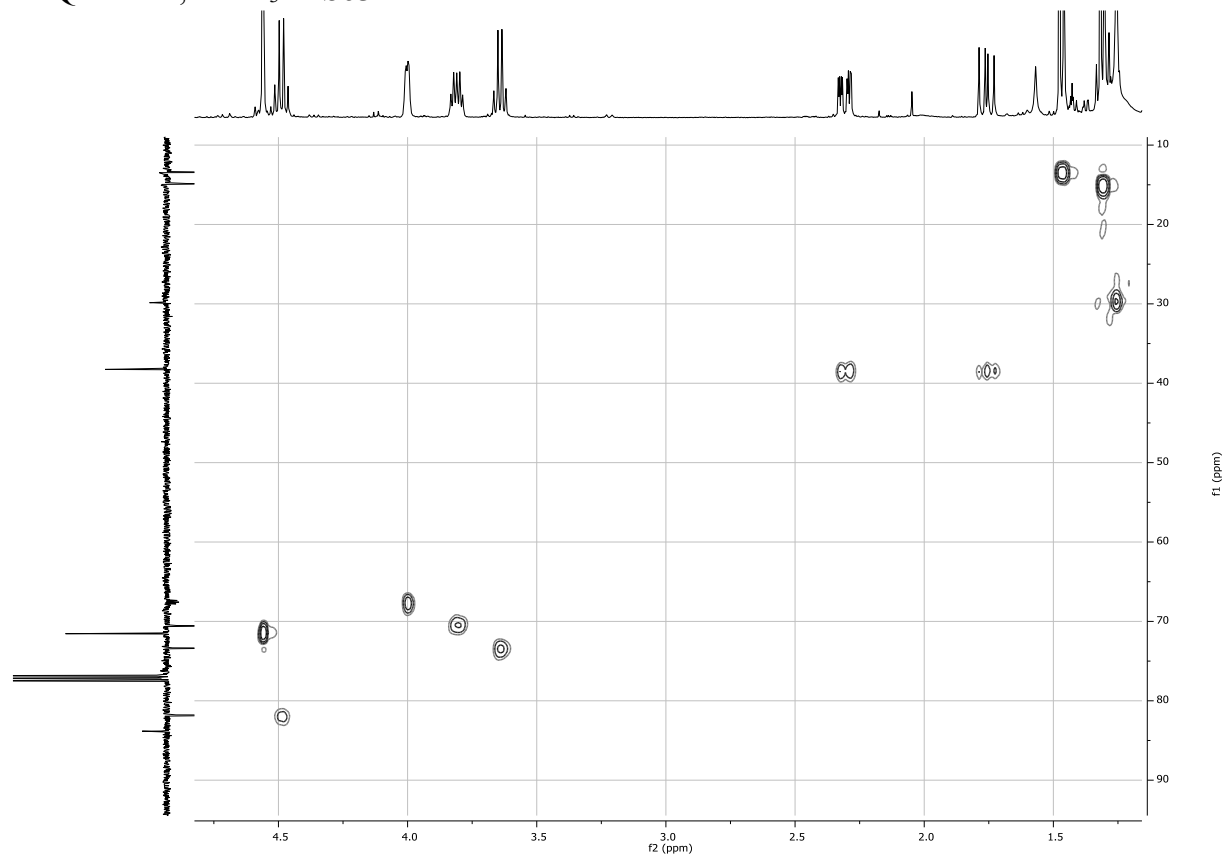

<sup>1</sup>H NMR, 500 MHz, CDCl<sub>3</sub> of S66

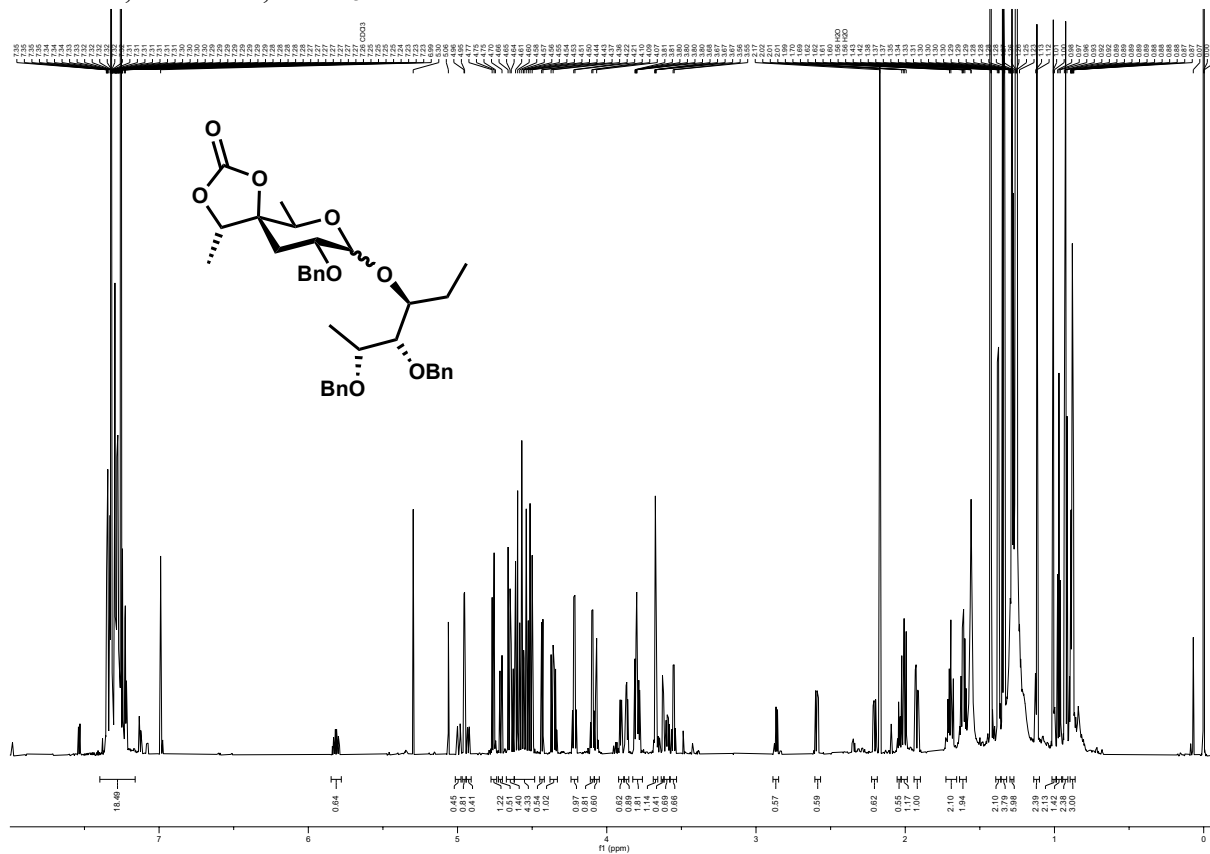

<sup>13</sup>C NMR, 126 MHz, CDCl<sub>3</sub> of S66

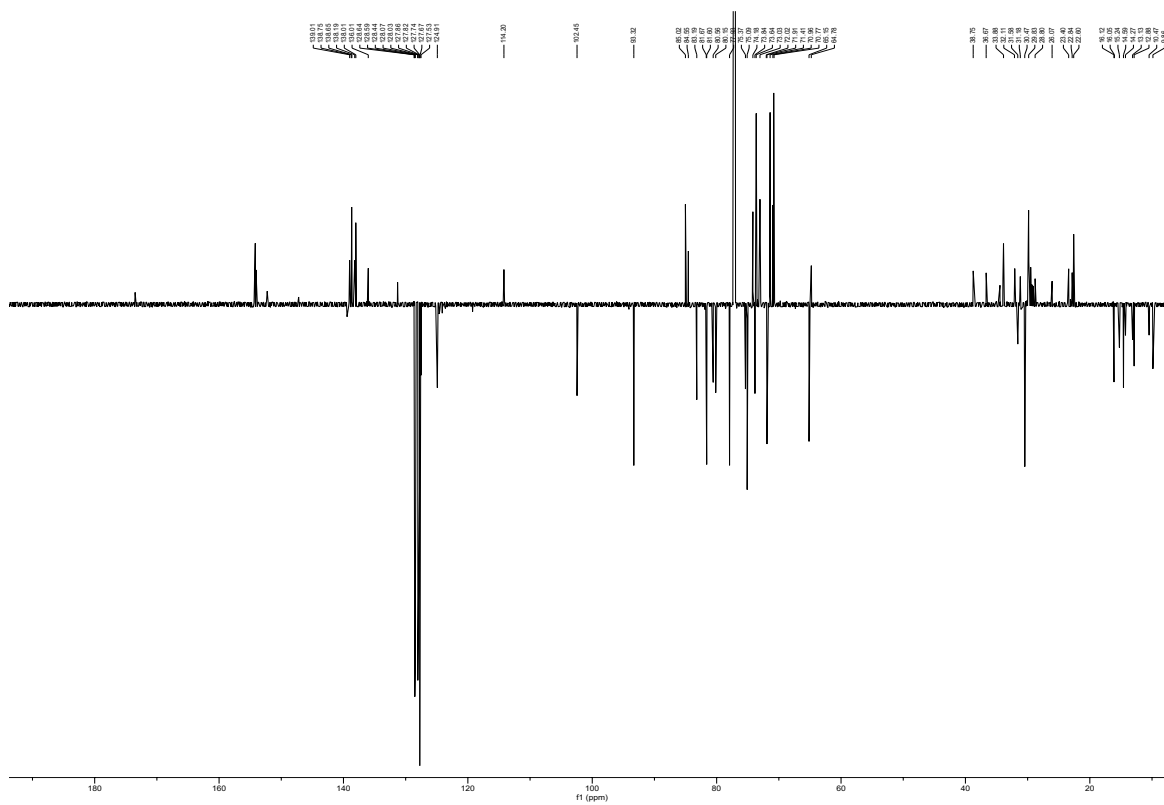

HH-COSY NMR, CDCl<sub>3</sub> of S66

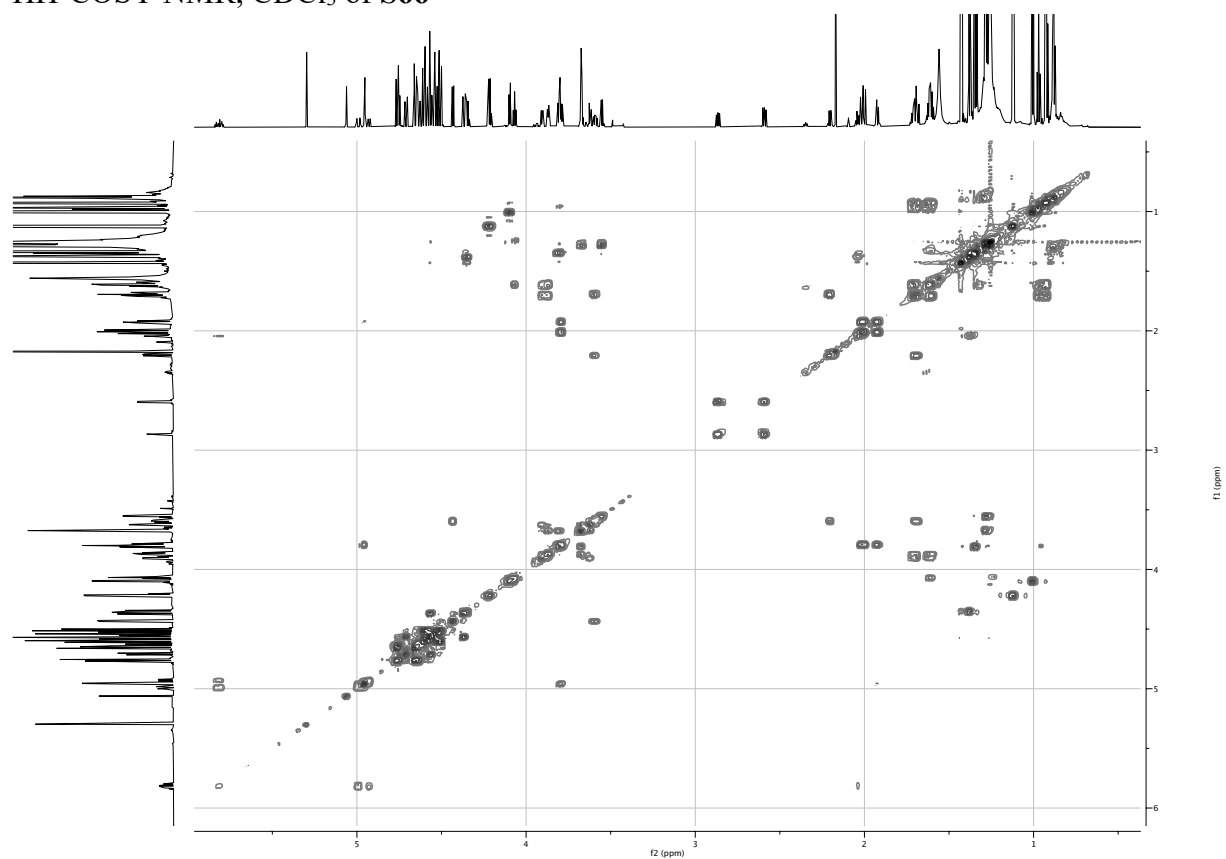

HSQC NMR, CDCl<sub>3</sub> of S66

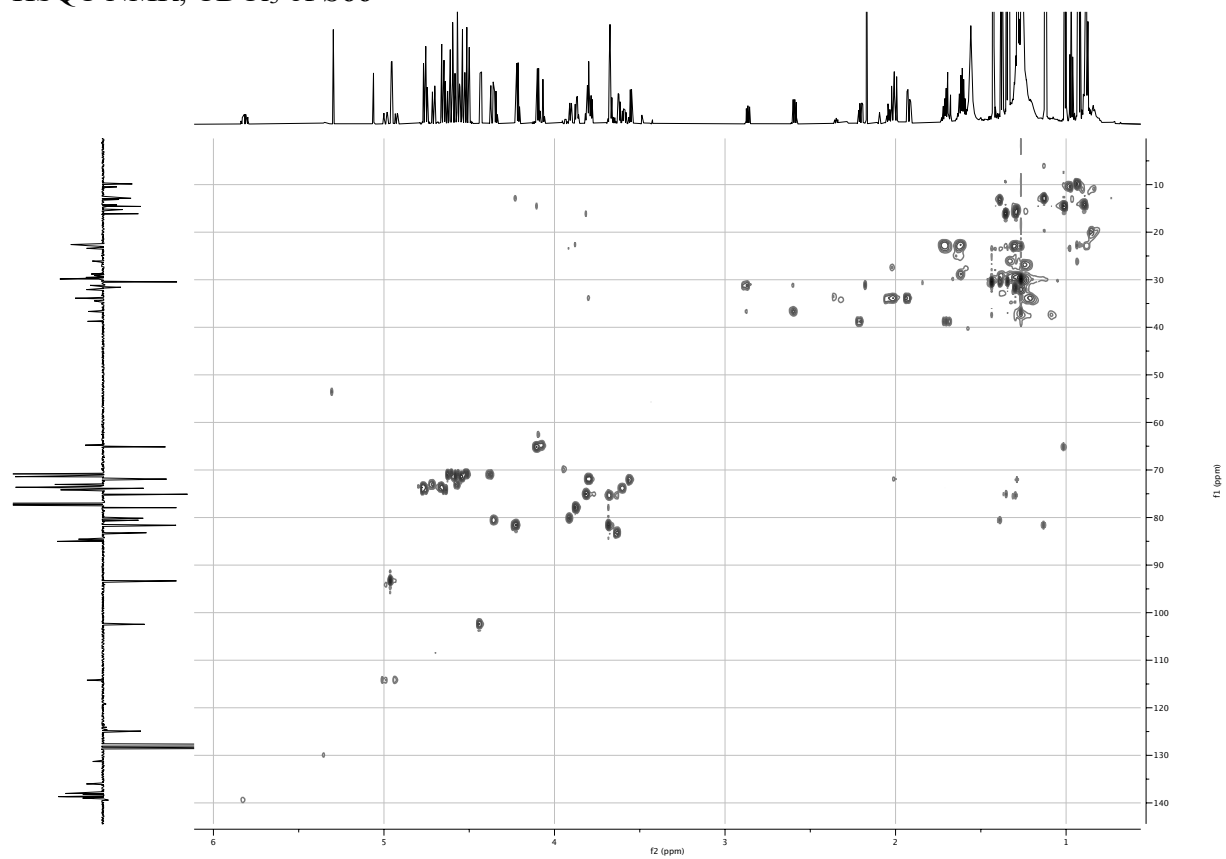



$^1\text{H}$  NMR, 500 MHz,  $\text{CDCl}_3$  of **S67**

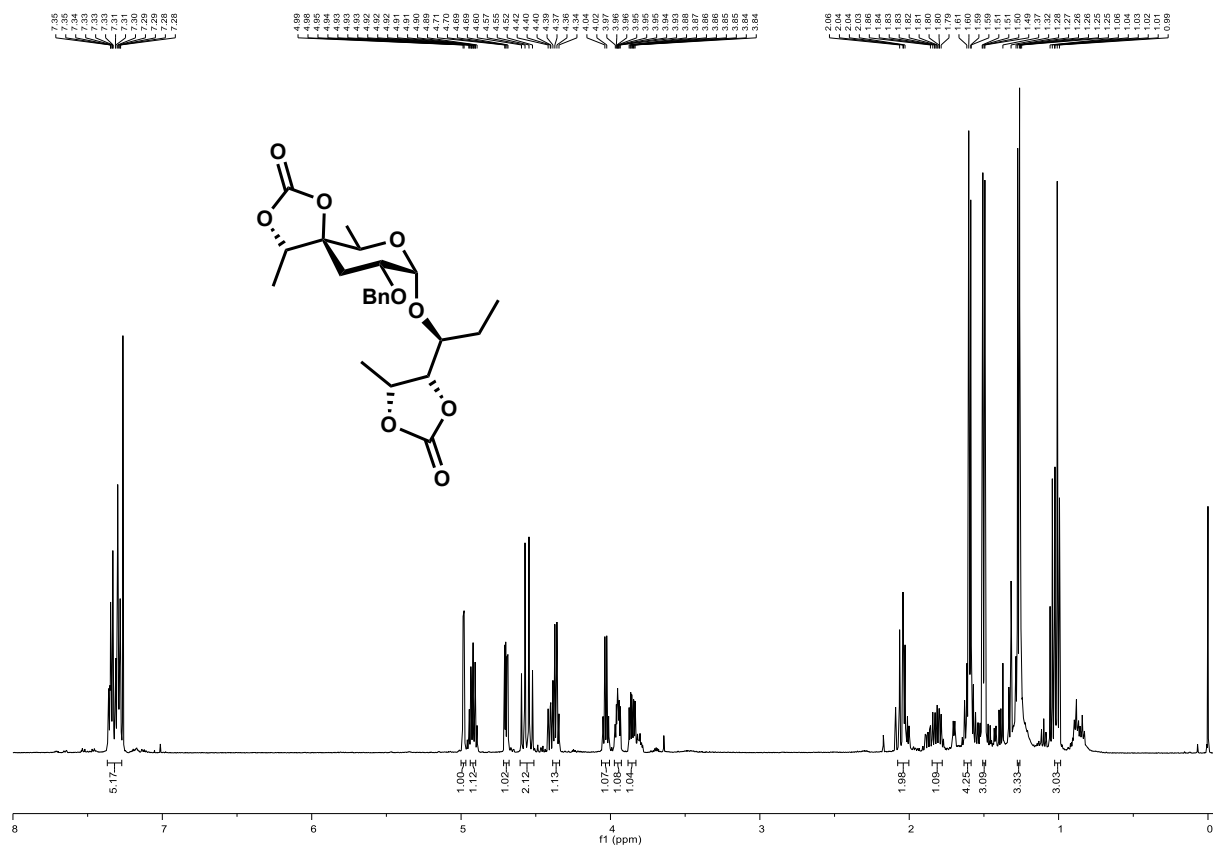

$^{13}\text{C}$  NMR, 126 MHz,  $\text{CDCl}_3$  of **S67**

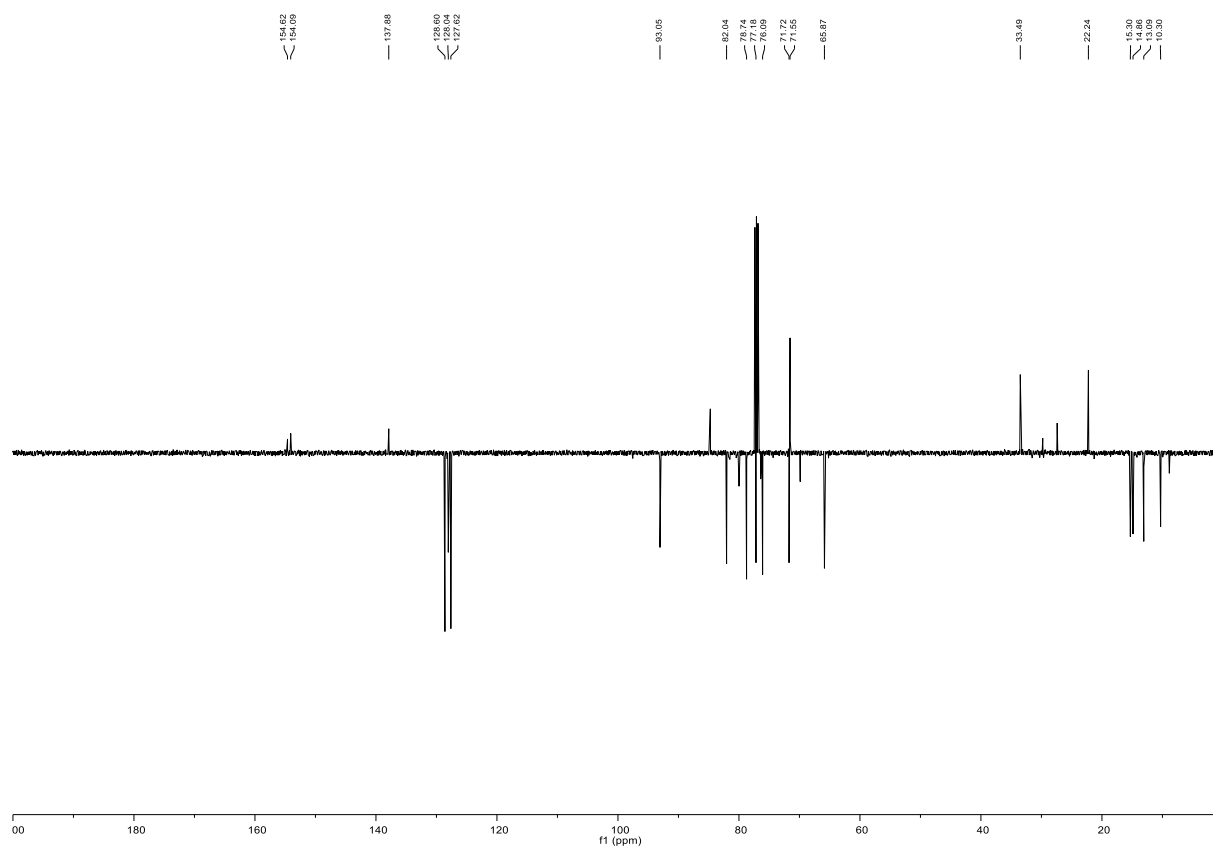

HH-COSY NMR, CDCl<sub>3</sub> of S67

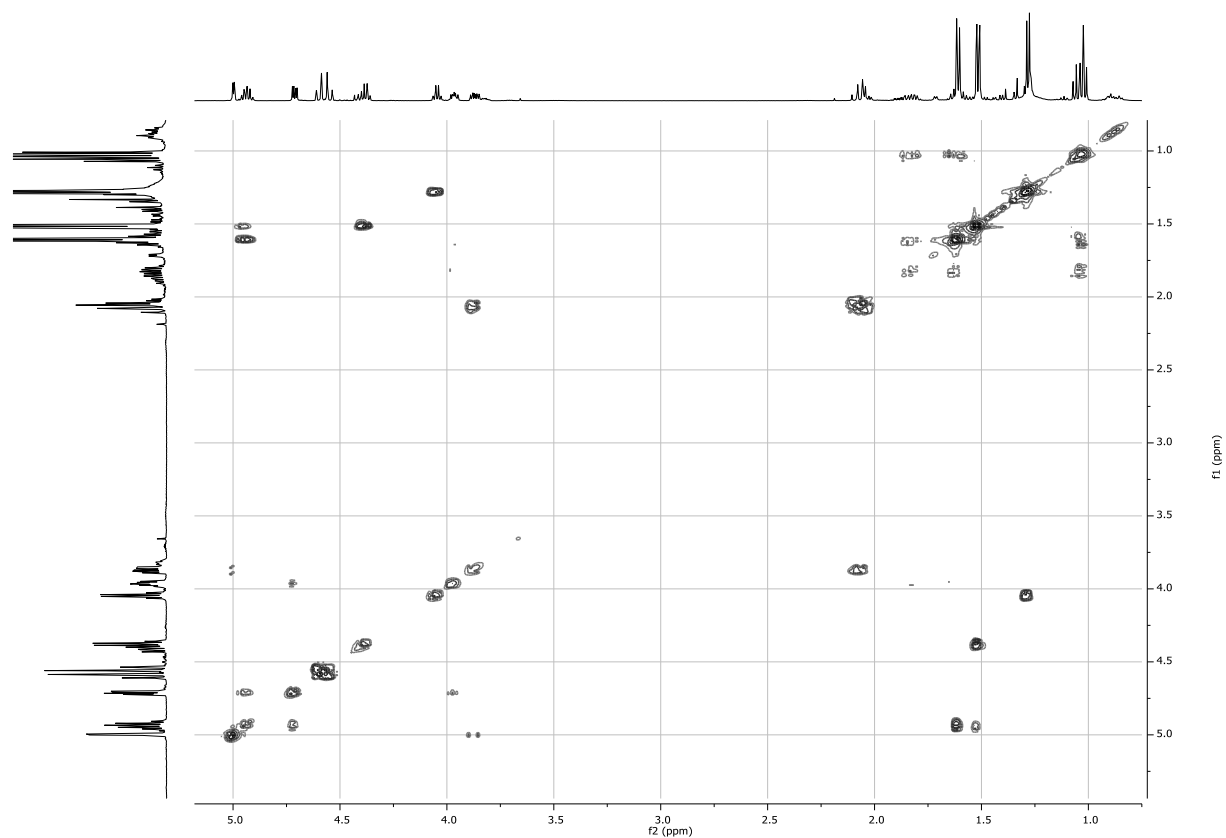

HSQC NMR, CDCl<sub>3</sub> of S67

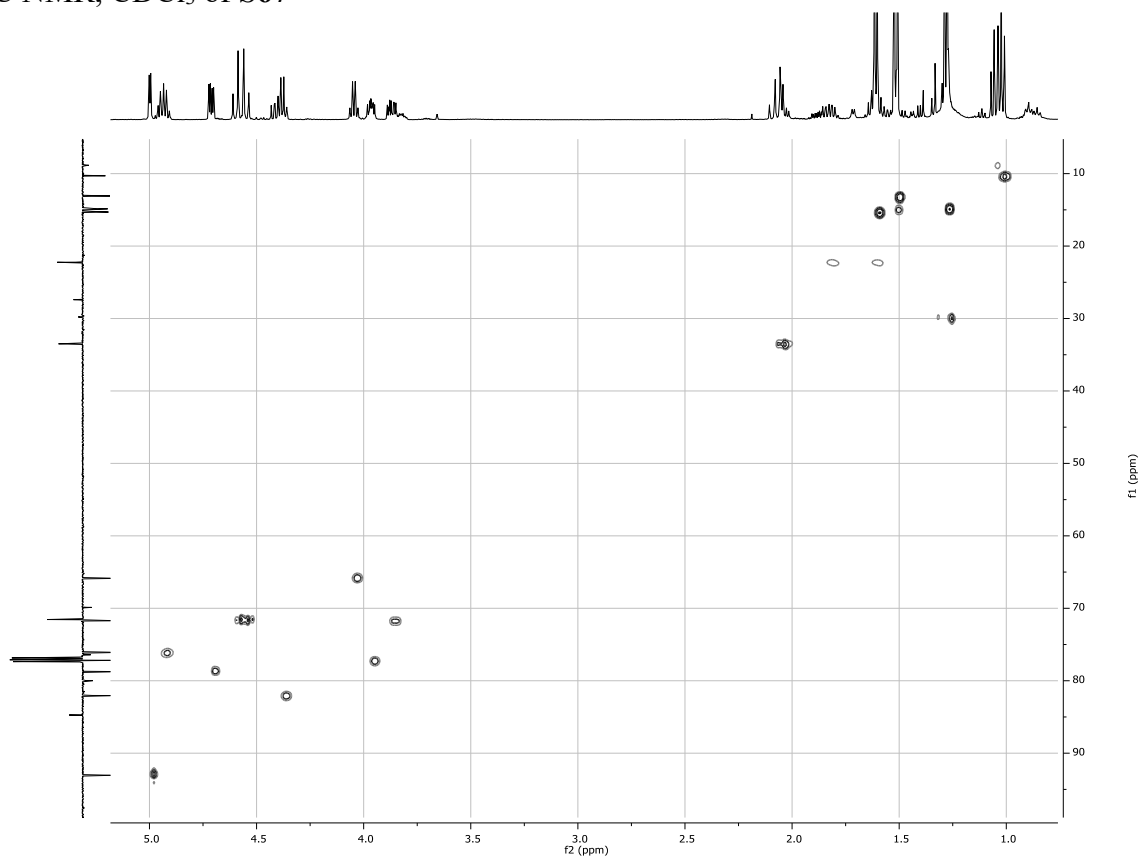

HMBC NMR, CDCl<sub>3</sub> of **S67**

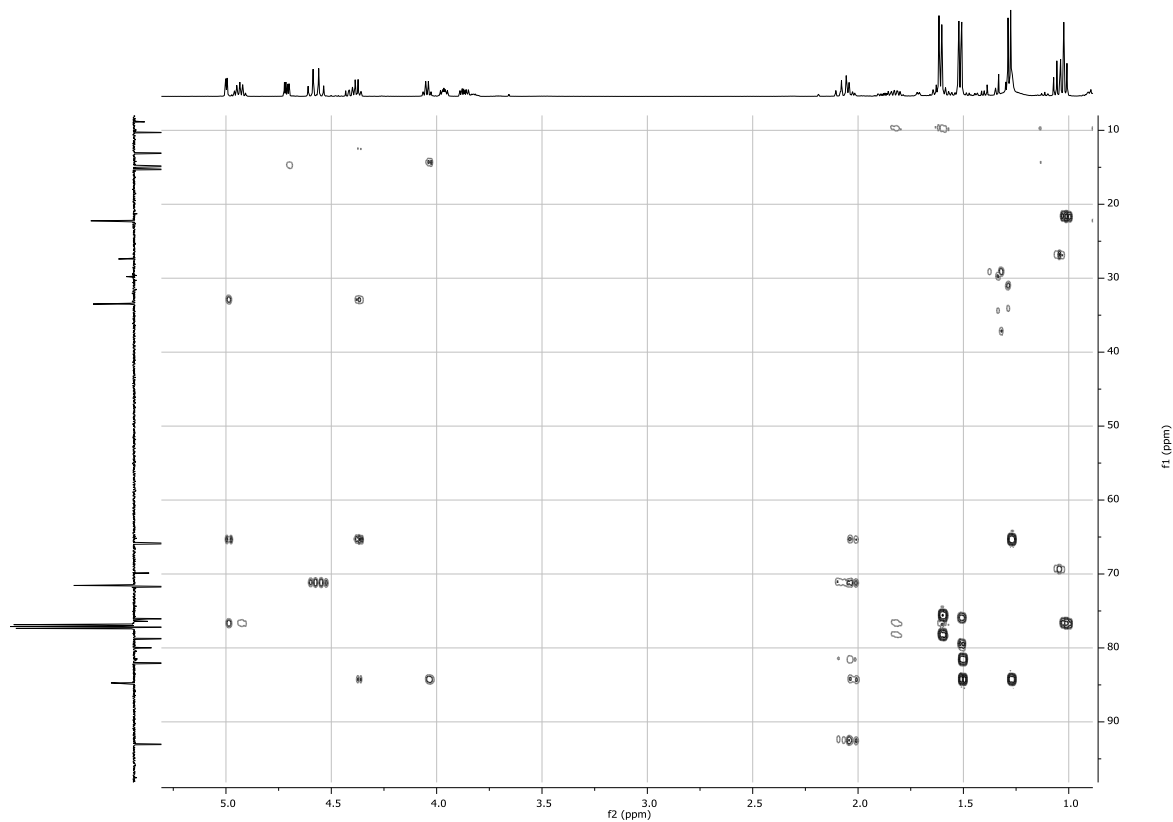

<sup>1</sup>H NMR, 500 MHz, CDCl<sub>3</sub> of **S60 (+DMF)**

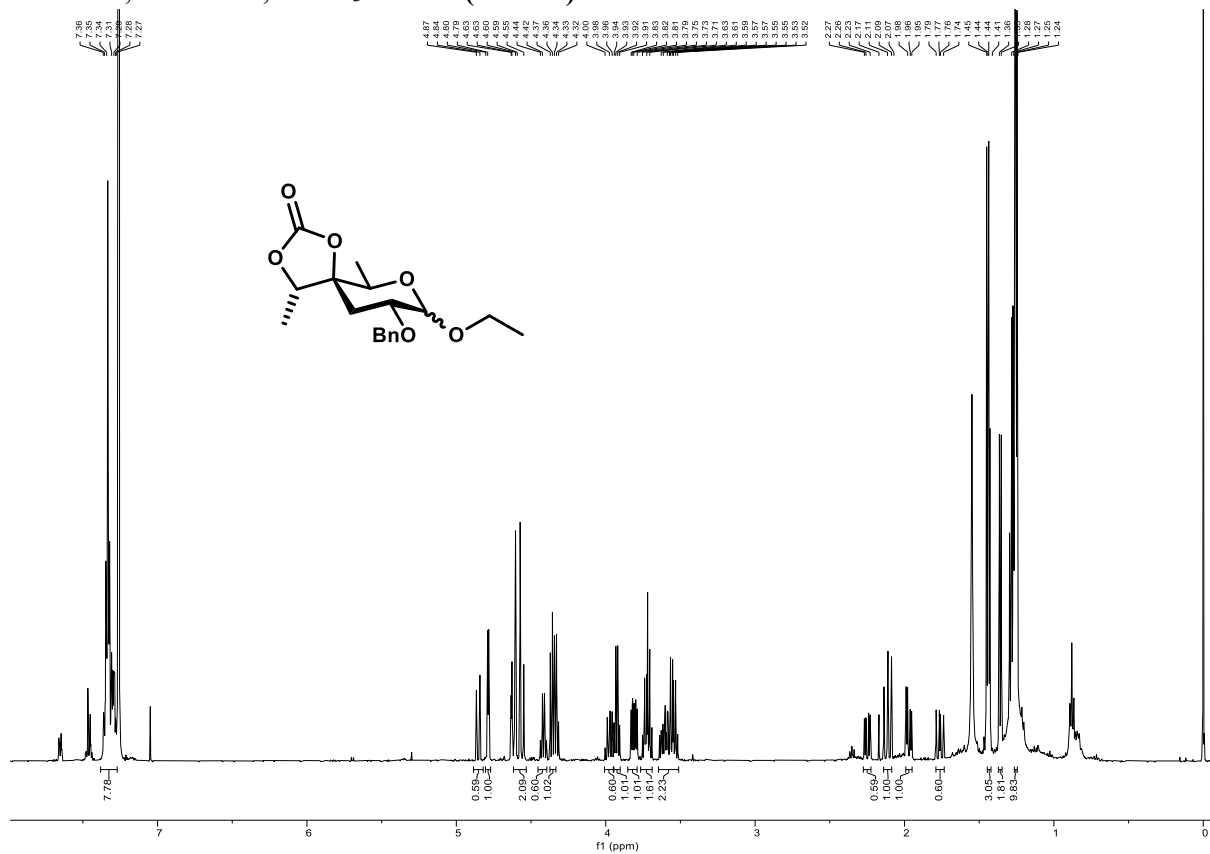

<sup>13</sup>C NMR, 125 MHz, CDCl<sub>3</sub> of S60 (+DMF)

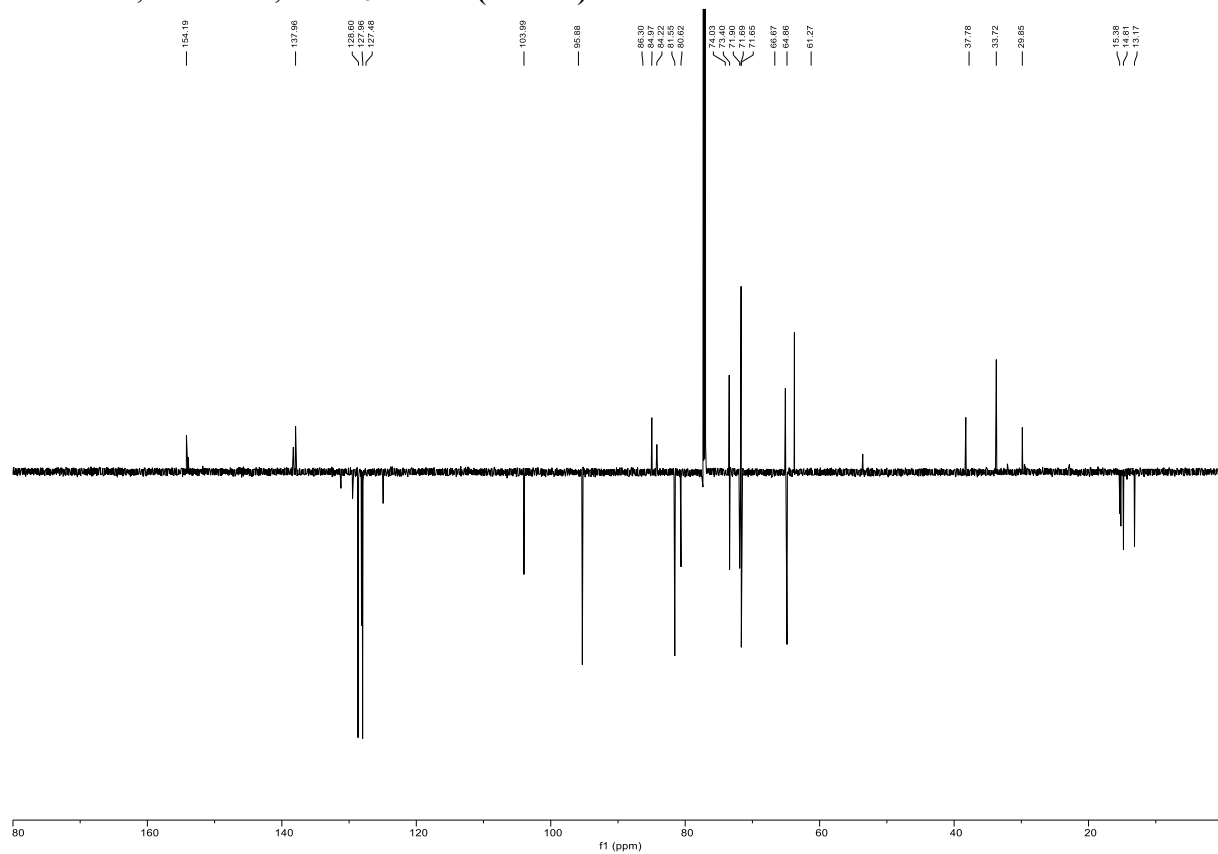

<sup>1</sup>H NMR, 500 MHz, CDCl<sub>3</sub> of S61 (+DMF)

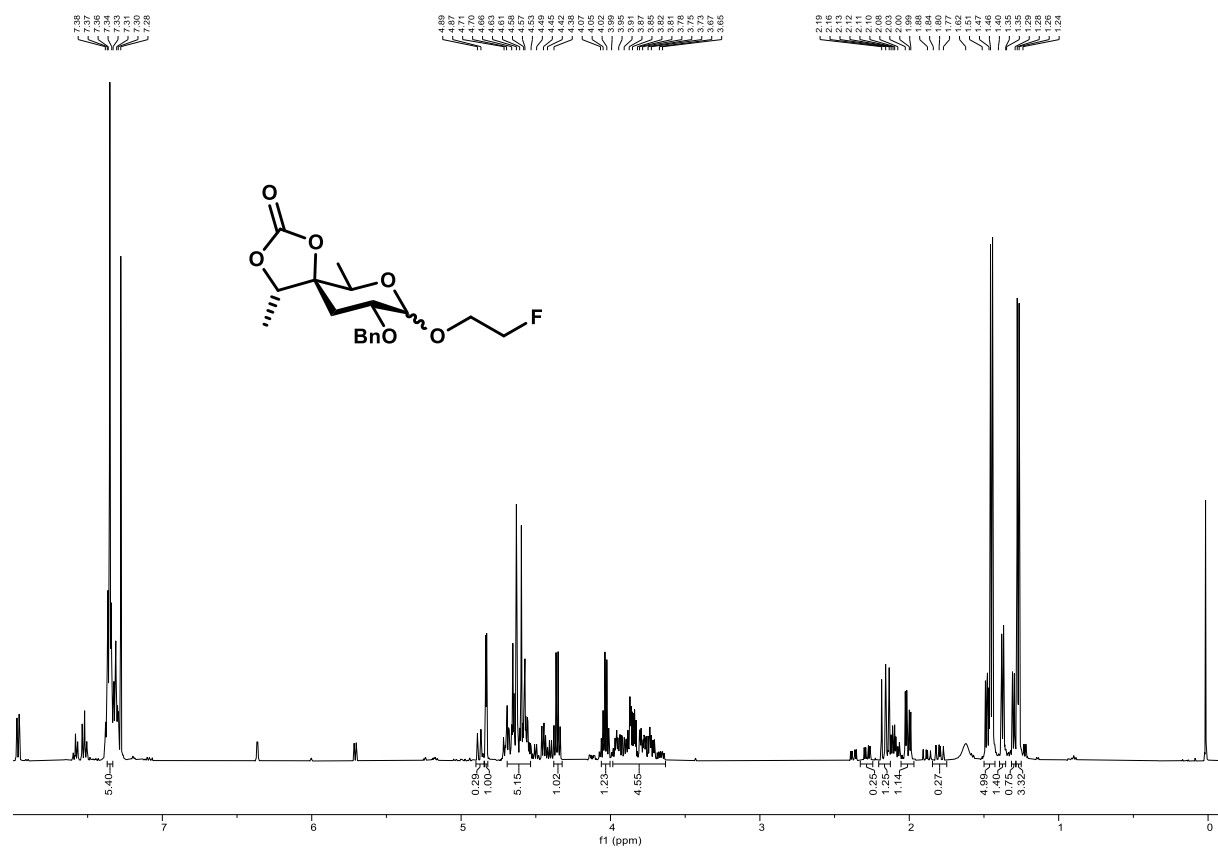

<sup>13</sup>C NMR, 126 MHz, CDCl<sub>3</sub> of S61 (+DMF)

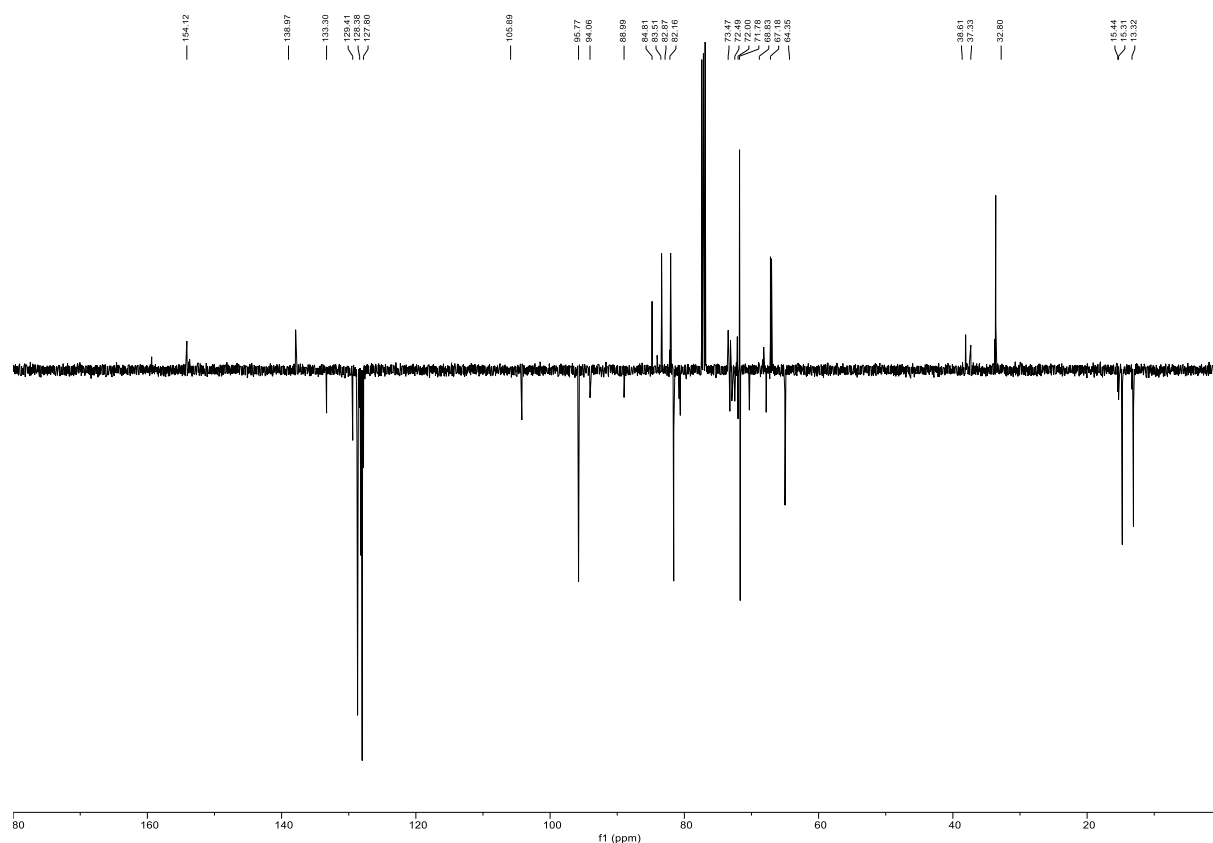

<sup>1</sup>H NMR, 500 MHz, CDCl<sub>3</sub> of S62 (+DMF)

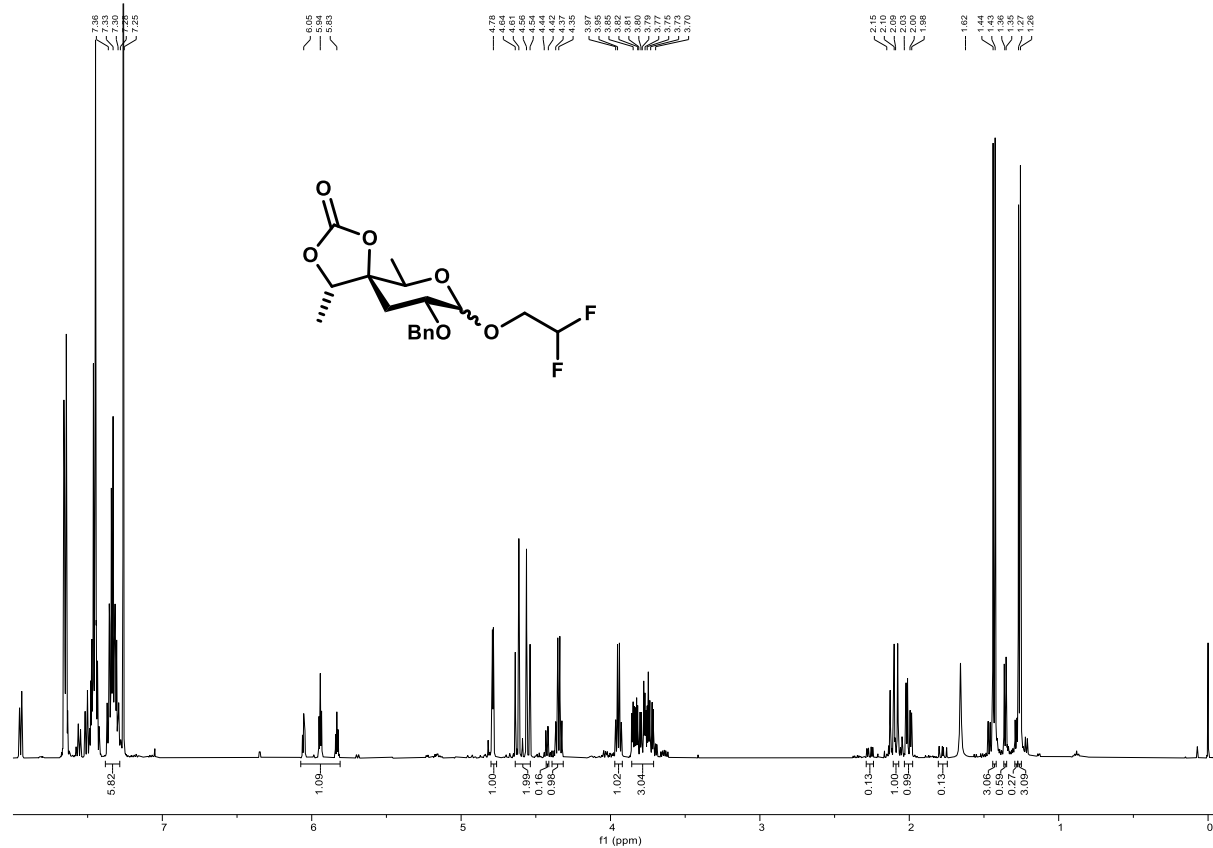

$^{13}\text{C}$  NMR, 126 MHz,  $\text{CDCl}_3$  of **S62** (+DMF)

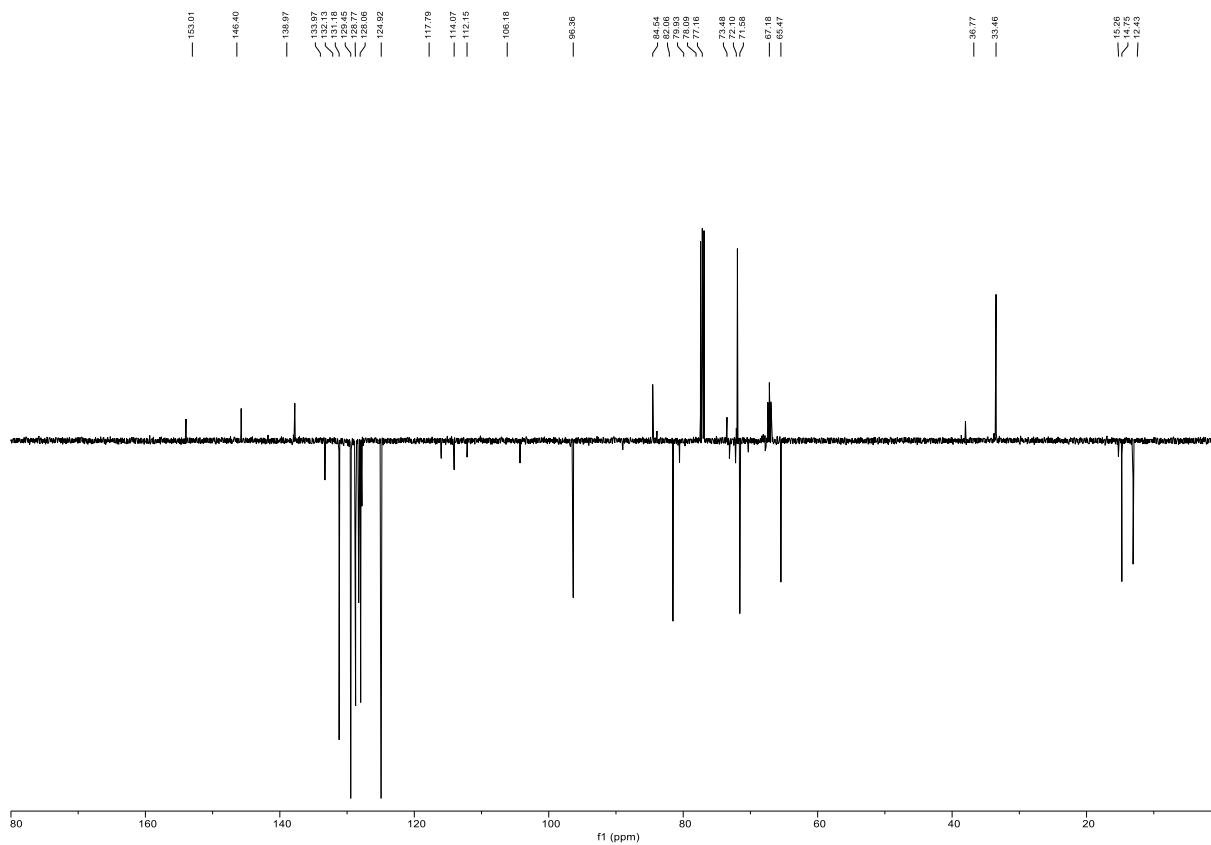

$^1\text{H}$  NMR, 500 MHz,  $\text{CDCl}_3$  of **S63** (+DMF)

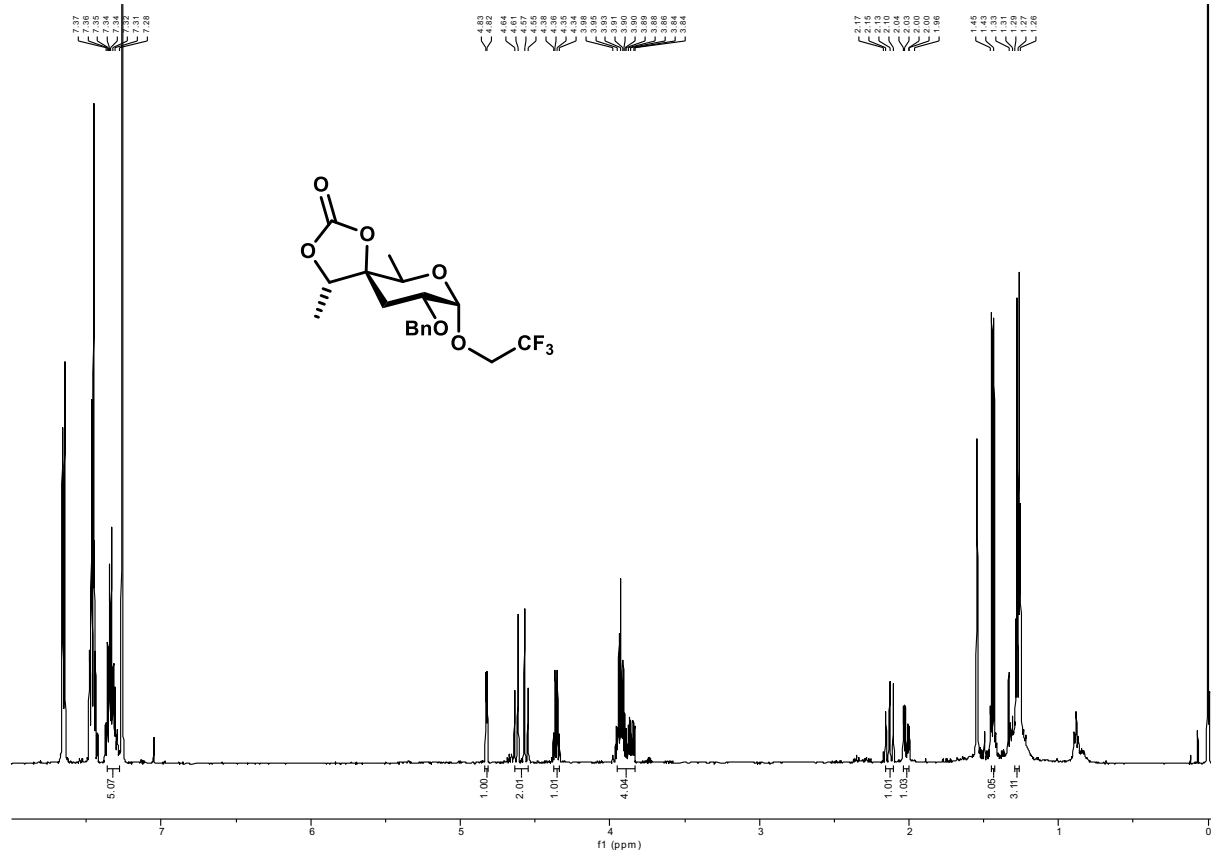

$^{13}\text{C}$  NMR, 214 MHz,  $\text{CDCl}_3$  of **S63** (+DMF)

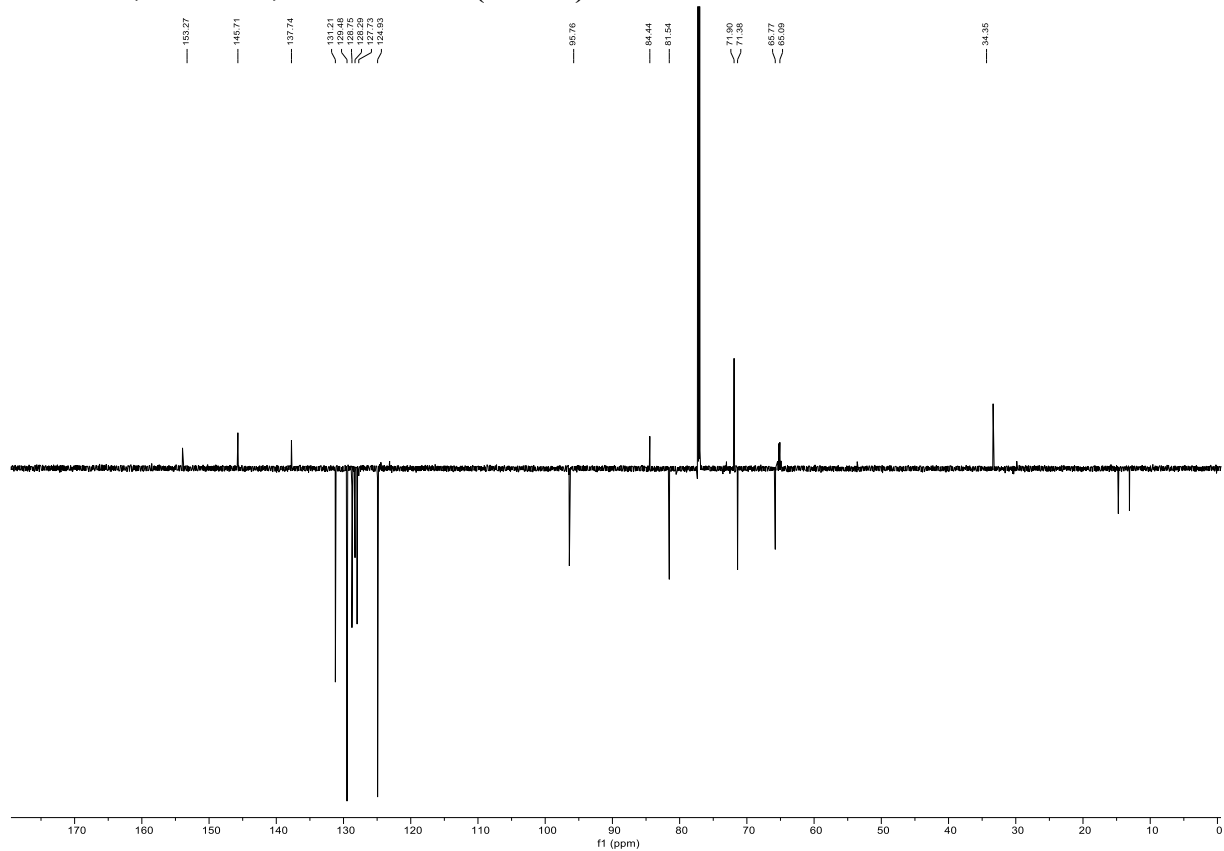

$^1\text{H}$  NMR, 850 MHz,  $\text{CDCl}_3$  of **S59** (+DMF)

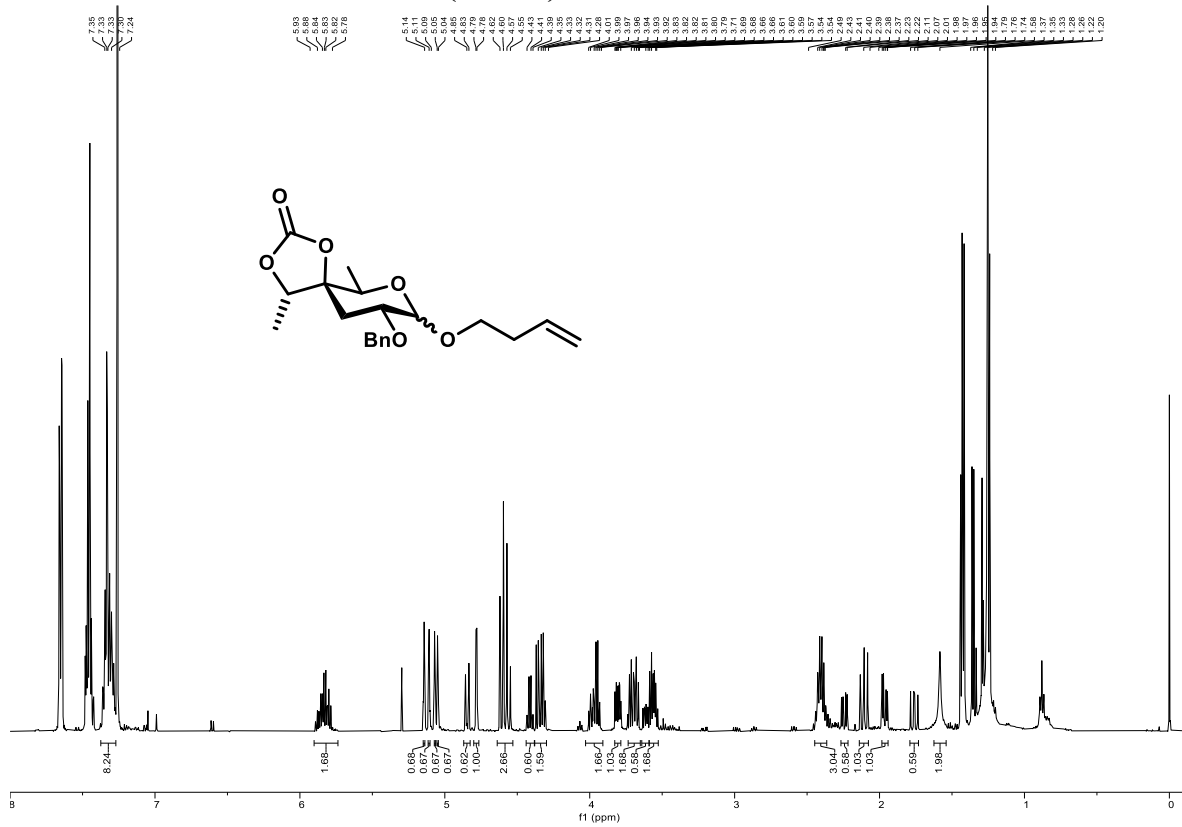

<sup>13</sup>C NMR, 214 MHz, CDCl<sub>3</sub> of **S59** (+DMF)

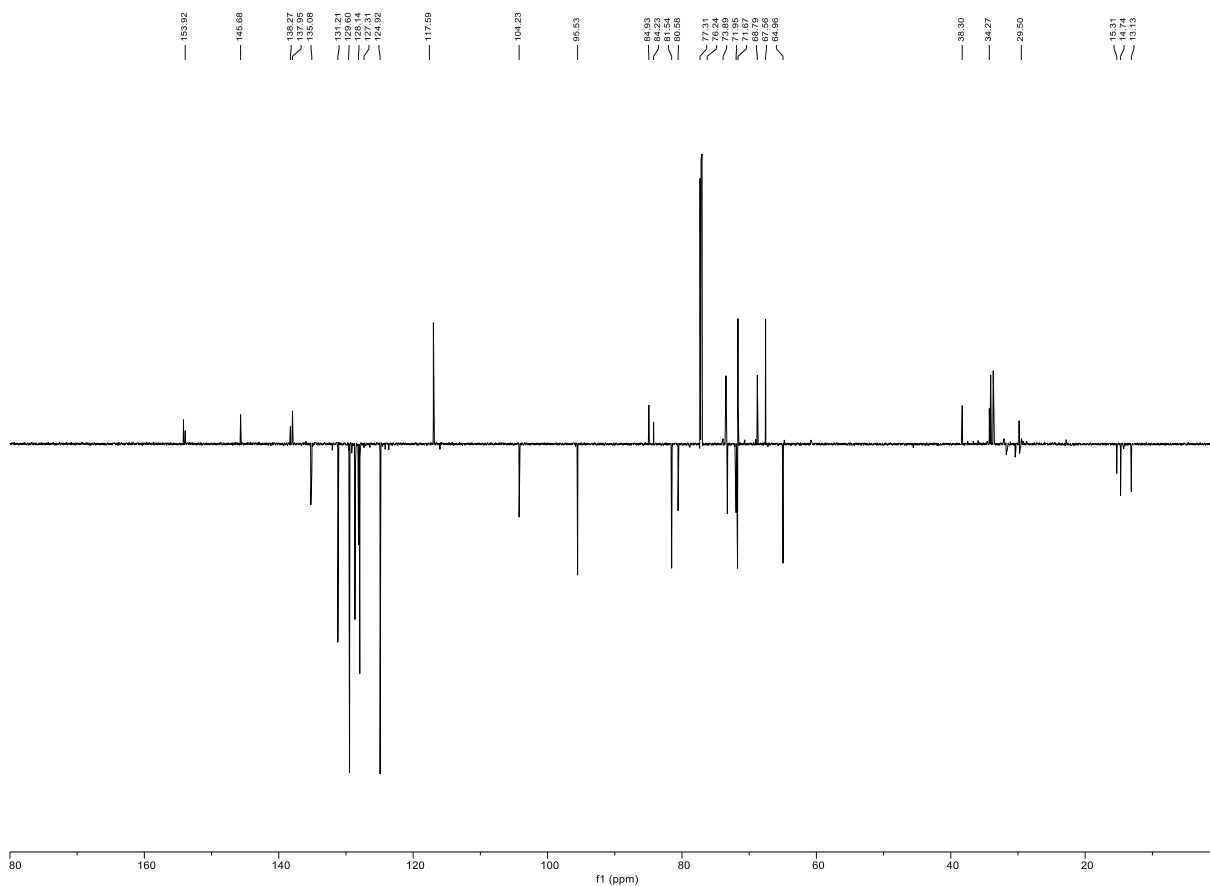

<sup>1</sup>H NMR, 500 MHz, CDCl<sub>3</sub> of **S60** (+TBAI)

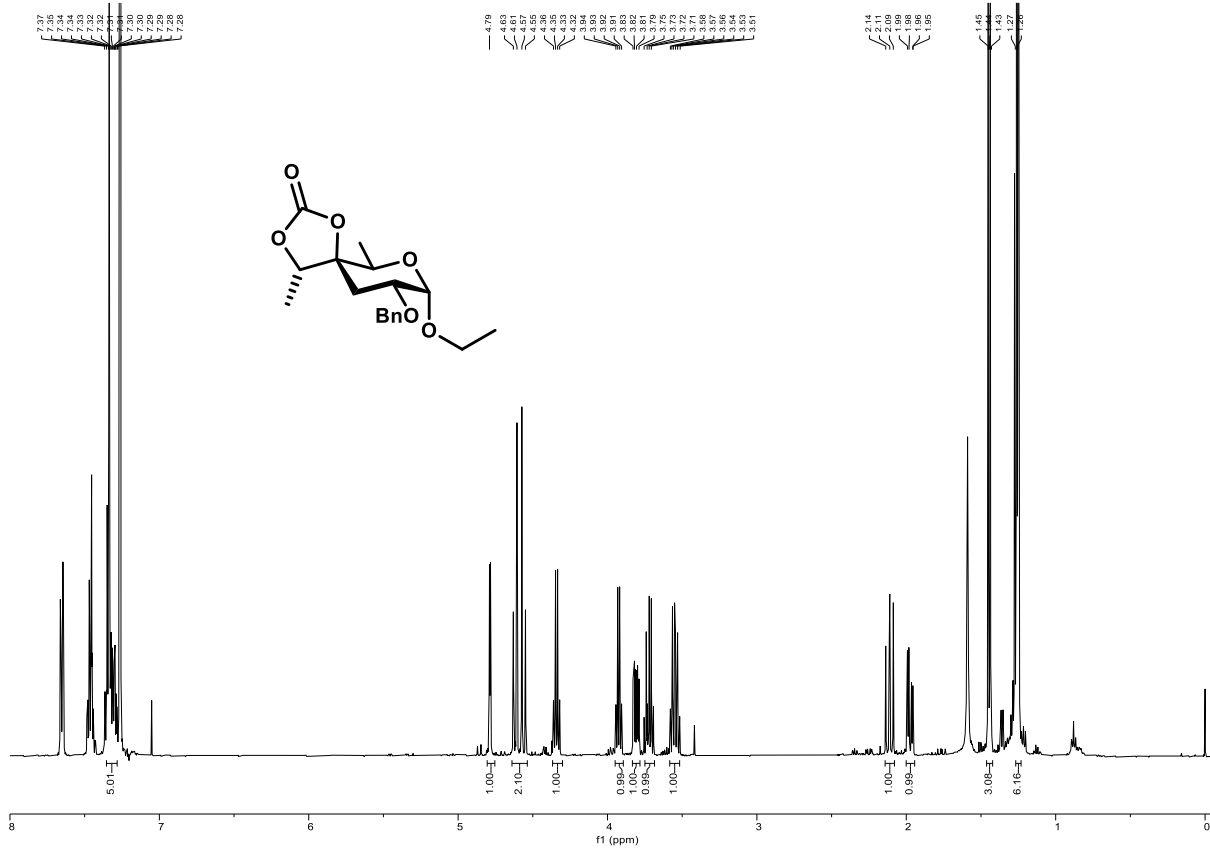



<sup>13</sup>C NMR, 126 MHz, CDCl<sub>3</sub> of **S60** (+TBAI)

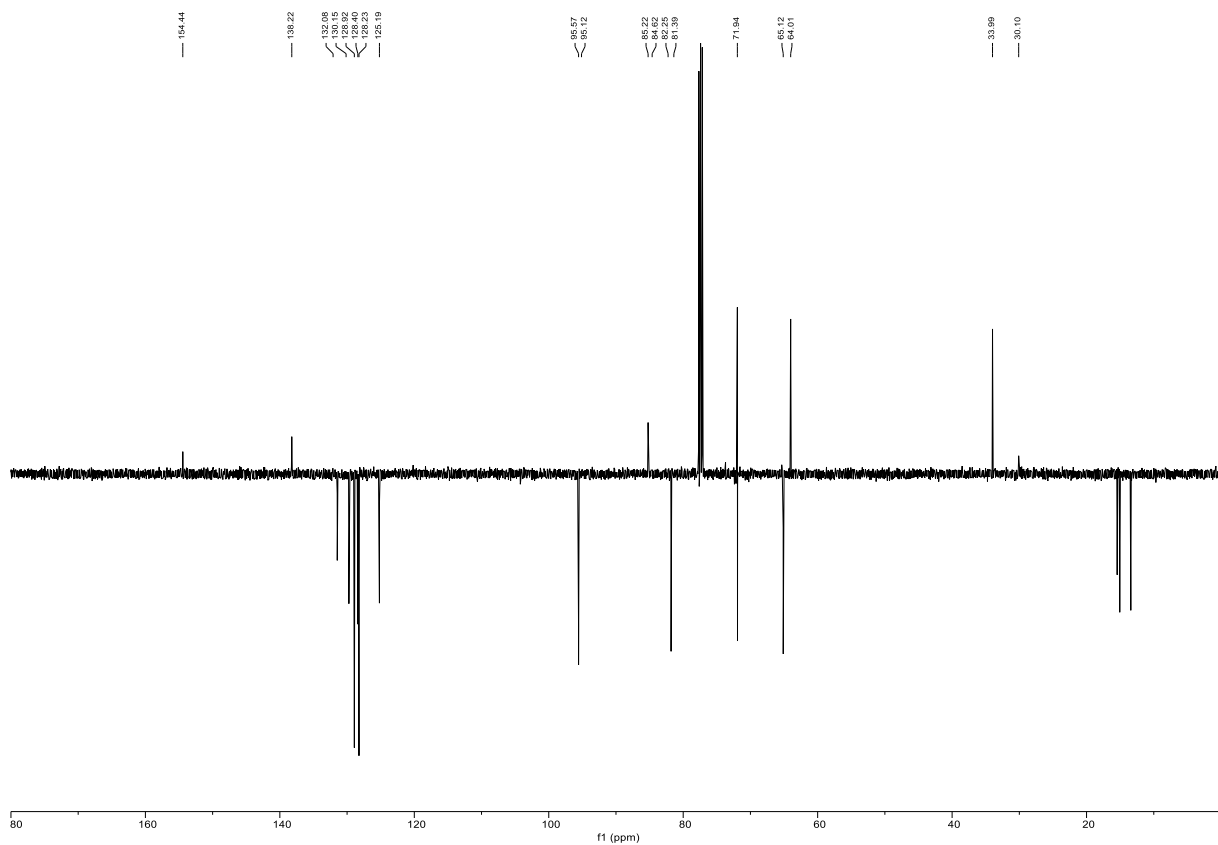

<sup>1</sup>H NMR, 500 MHz, CDCl<sub>3</sub> of **S61** (+TBAI)

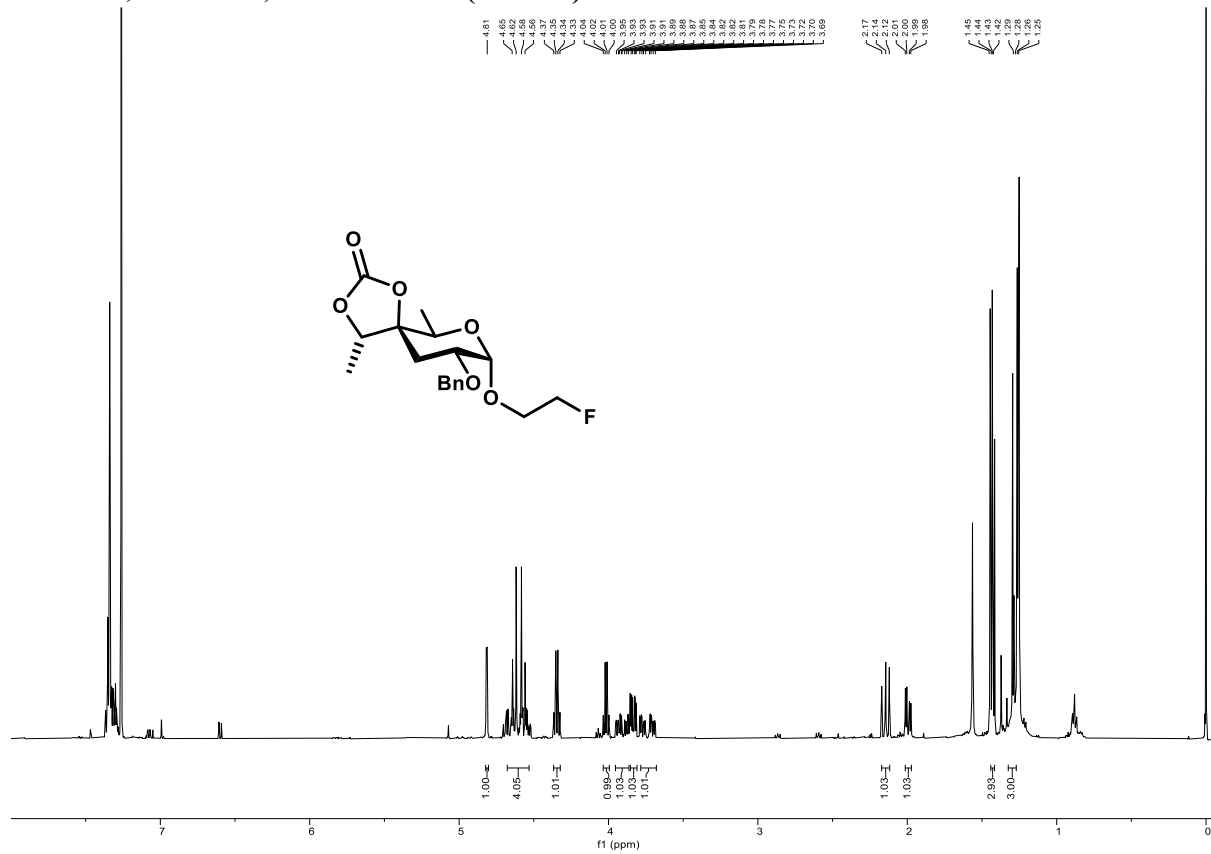

$^{13}\text{C}$  NMR, 126 MHz,  $\text{CDCl}_3$  of S61 (+TBAI)

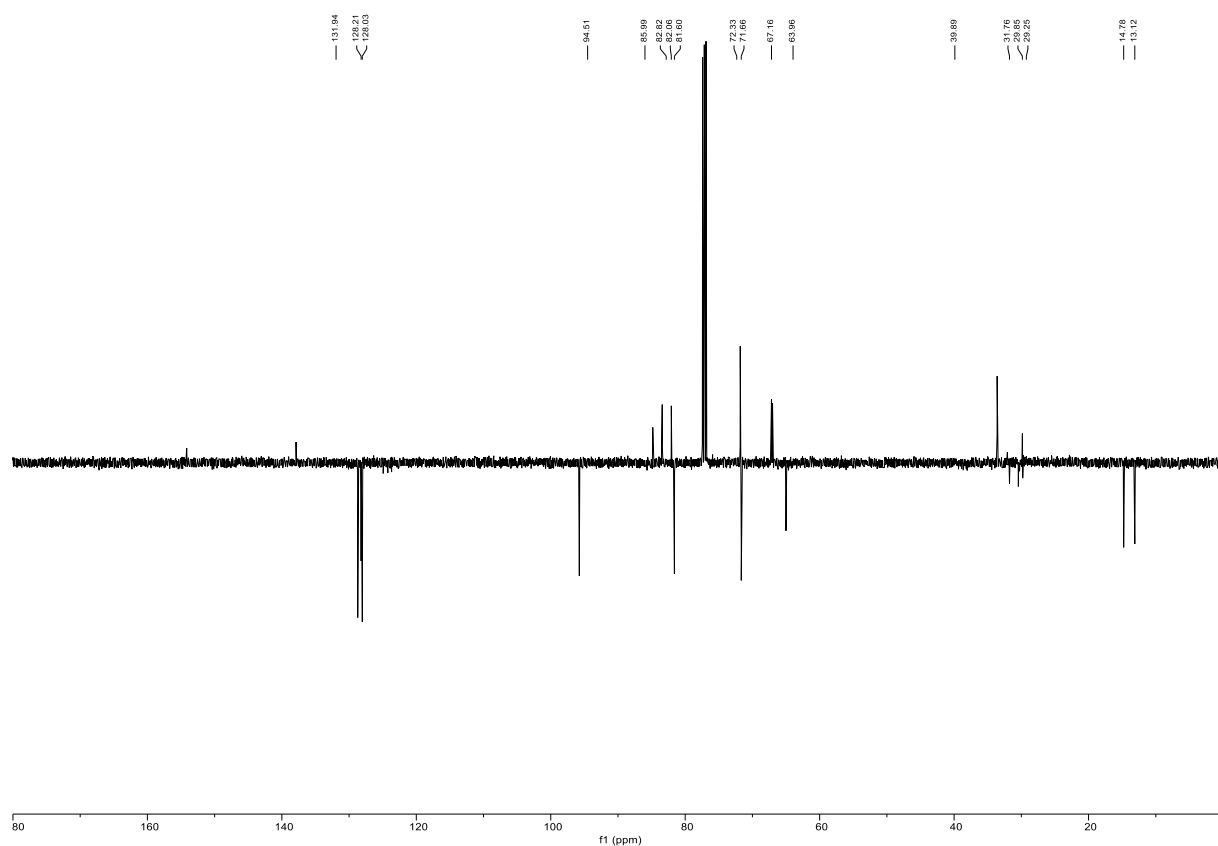

$^1\text{H}$  NMR, 500 MHz,  $\text{CDCl}_3$  of S62 (+TBAI)

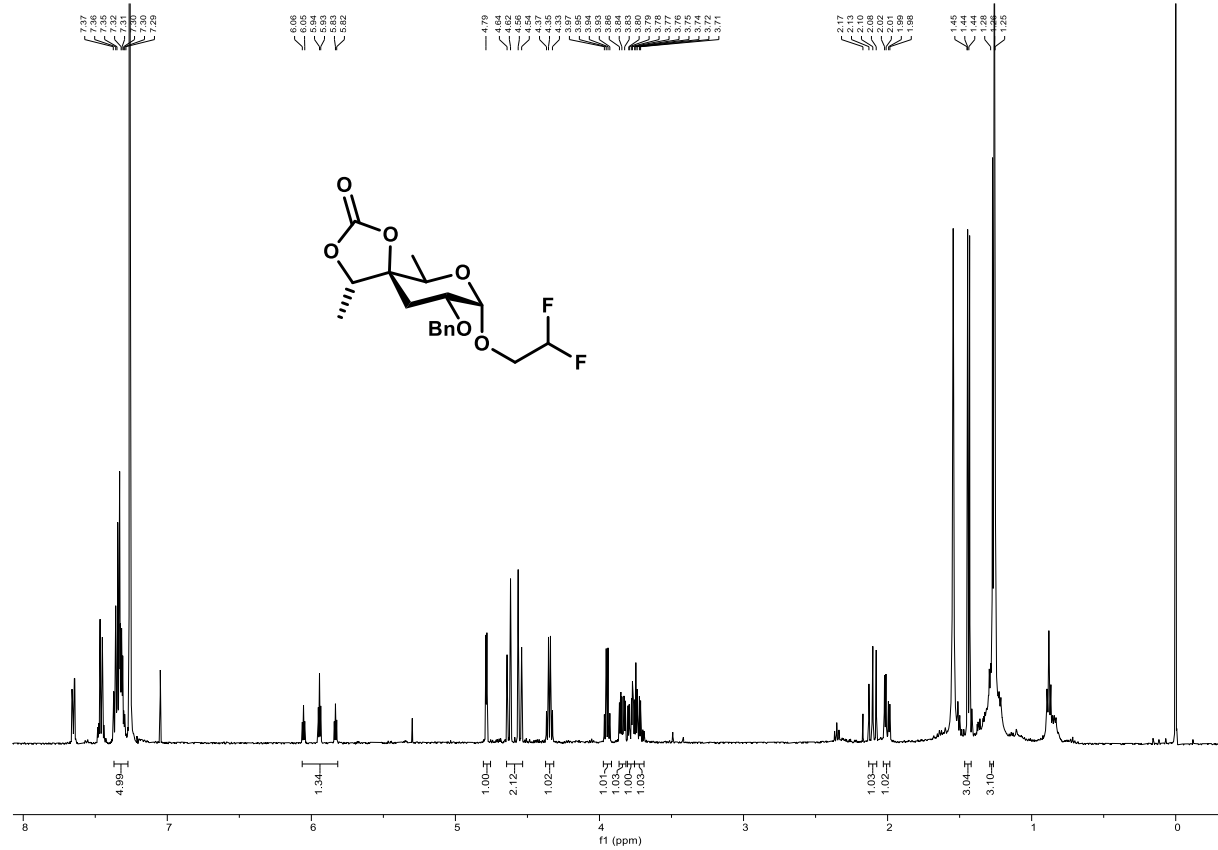

<sup>13</sup>C NMR, 126 MHz, CDCl<sub>3</sub> of S62 (+TBAI)

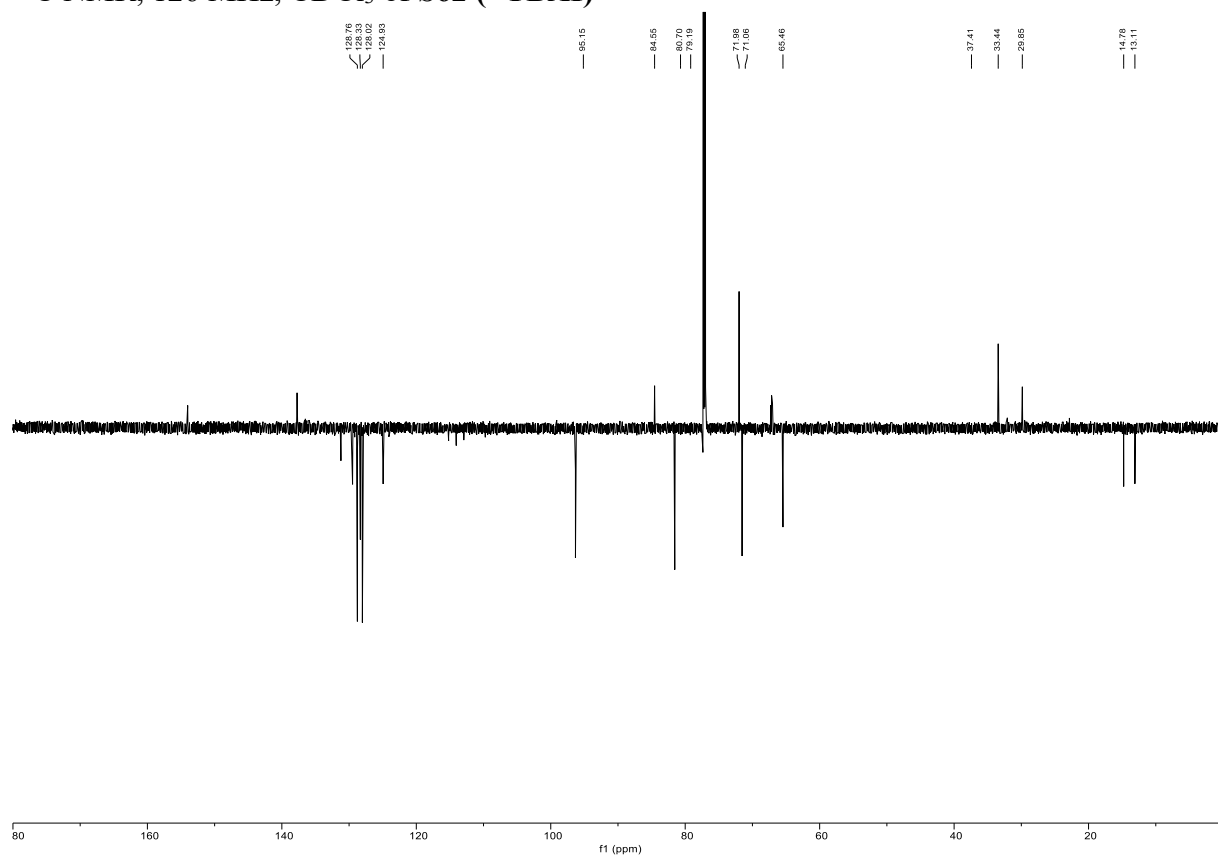

<sup>1</sup>H NMR, 400 MHz, CDCl<sub>3</sub> of S59 (+TBAI)

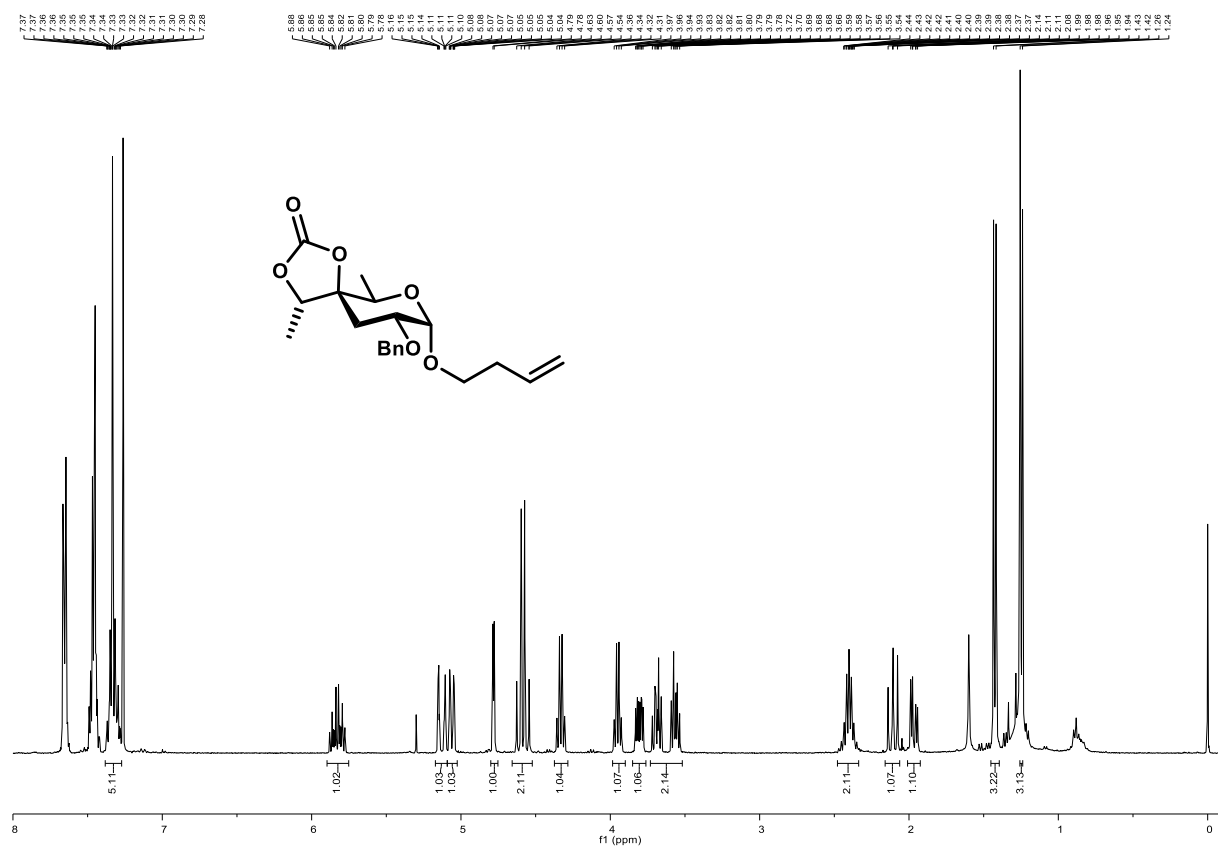

$^{13}\text{C}$  NMR, 101 MHz,  $\text{CDCl}_3$  of **S59** (+TBAI)

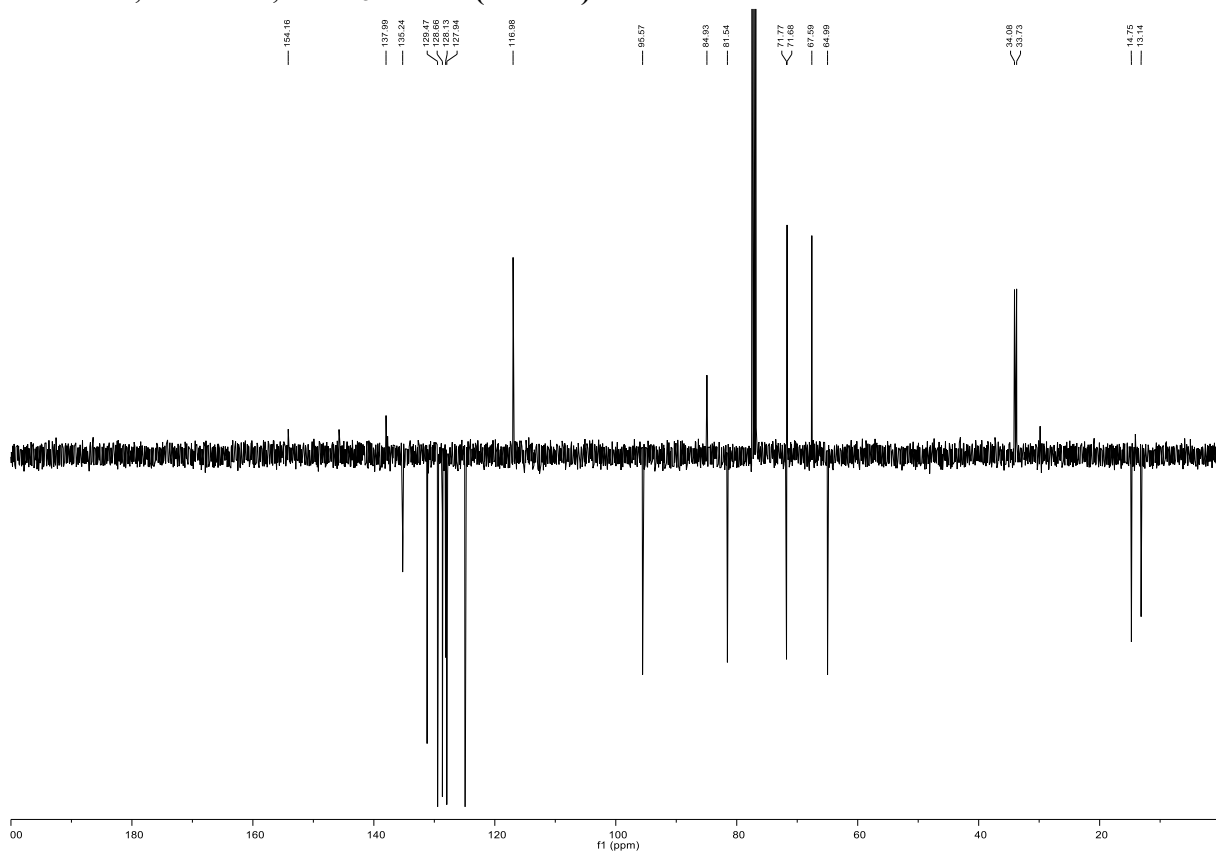

$^1\text{H}$  NMR, 400 MHz,  $\text{CDCl}_3$  of **26**

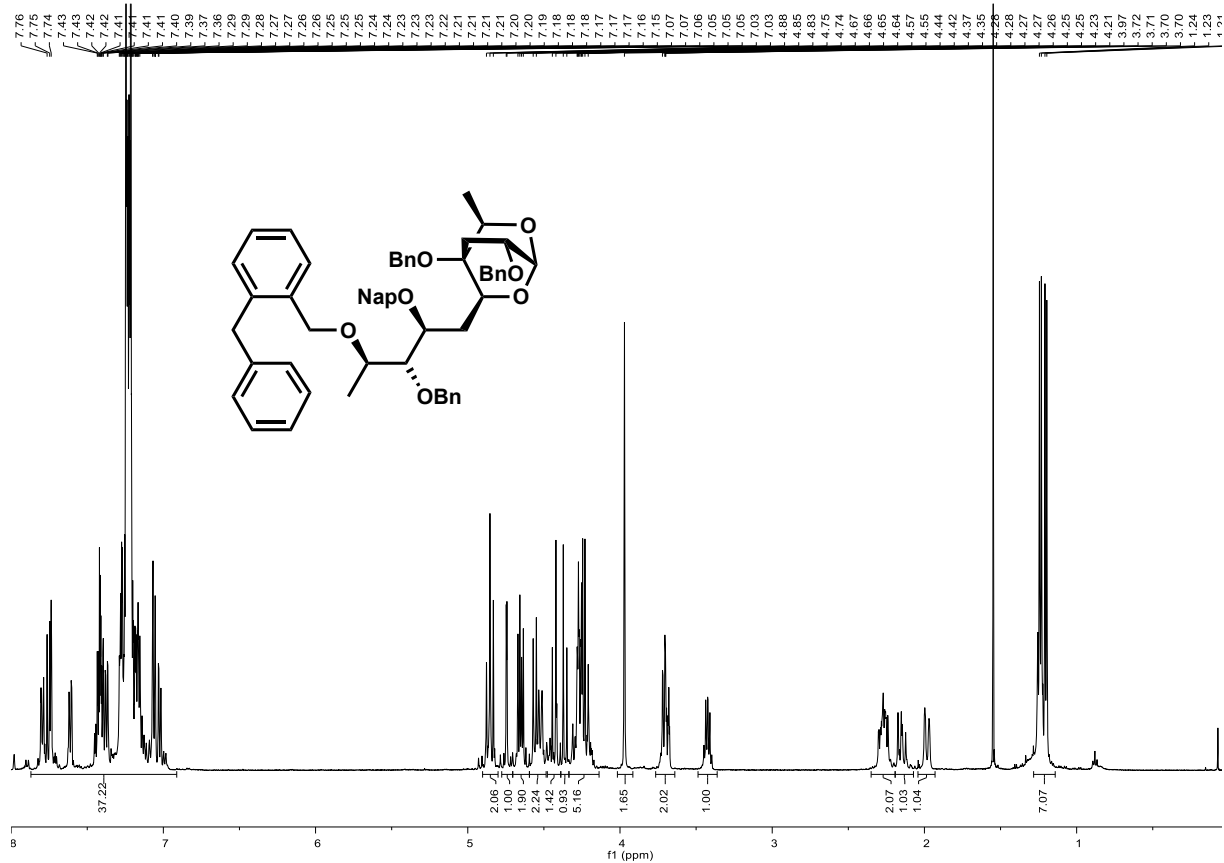

<sup>13</sup>C NMR, 101 MHz, CDCl<sub>3</sub> of **26**

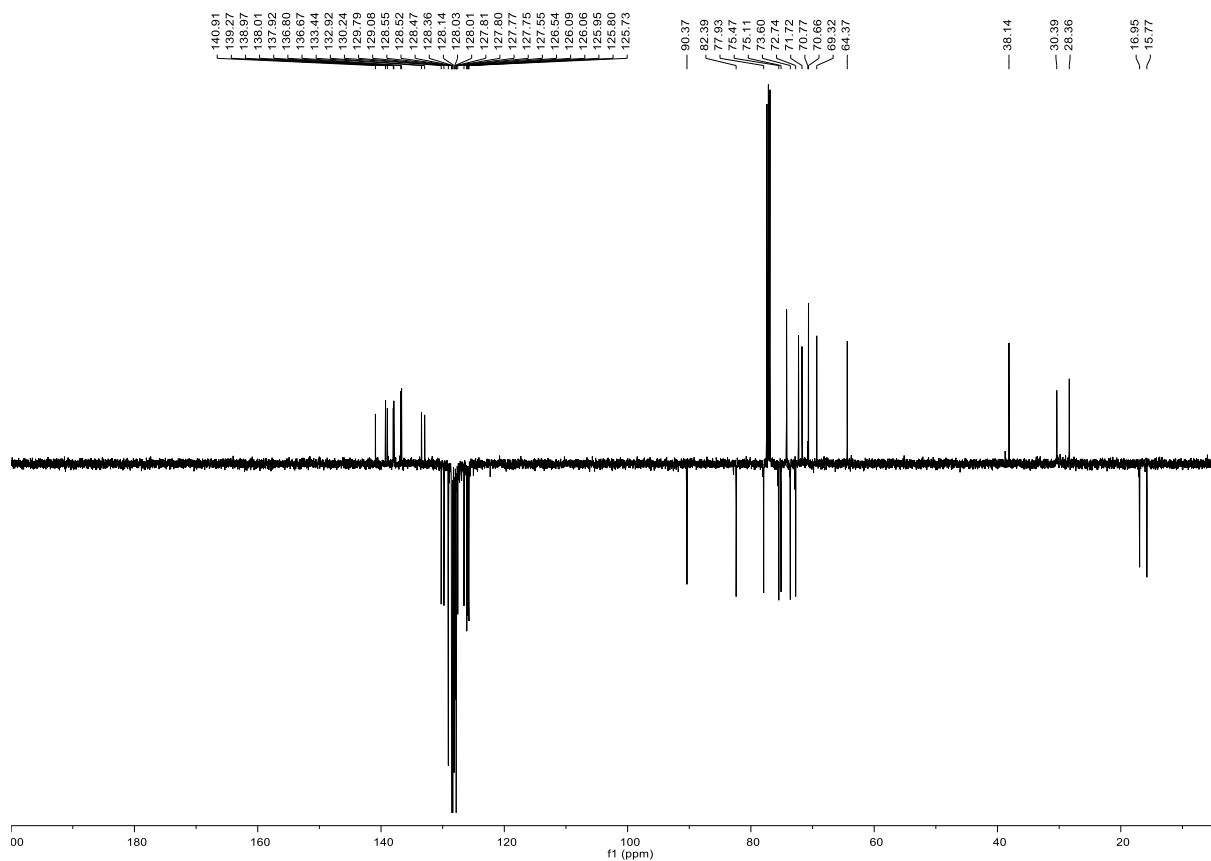

HH-COSY NMR, CDCl<sub>3</sub> of **26**

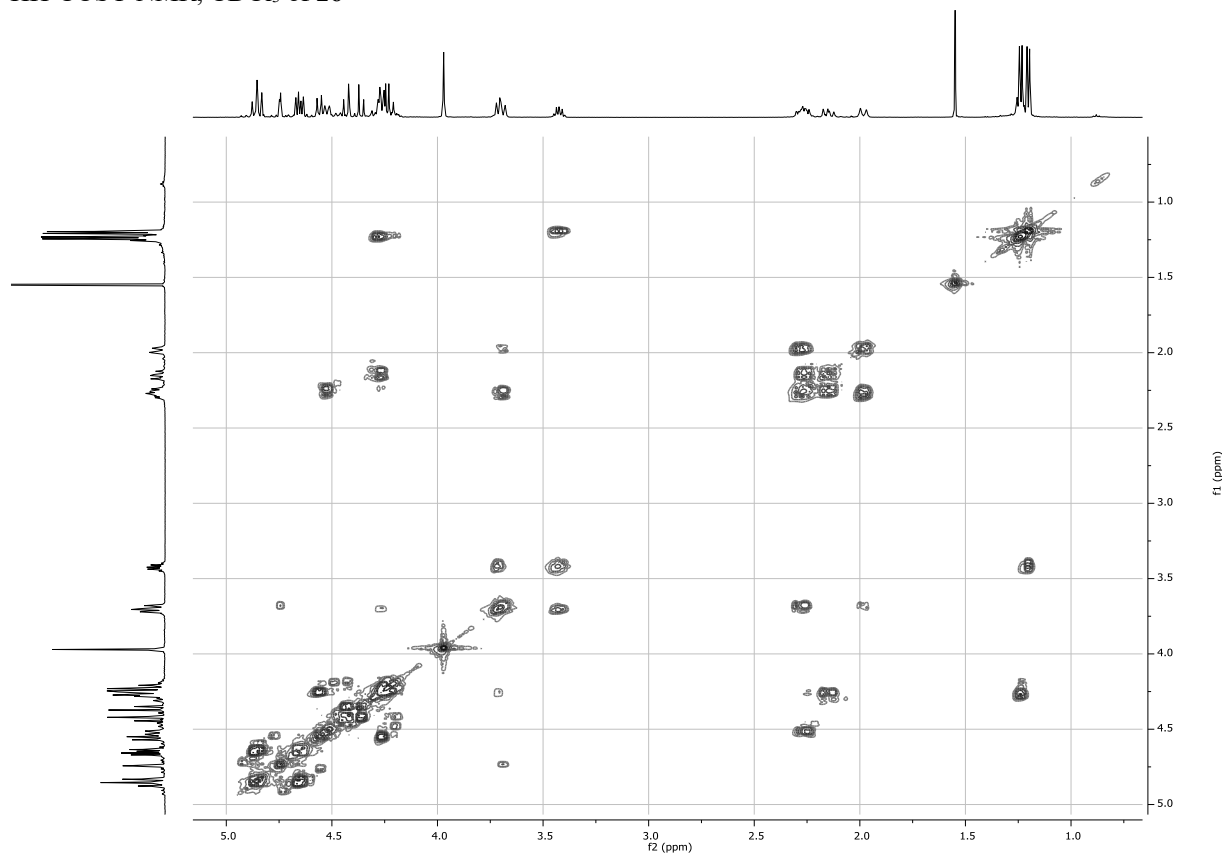

HSQC NMR, CDCl<sub>3</sub> of **26**

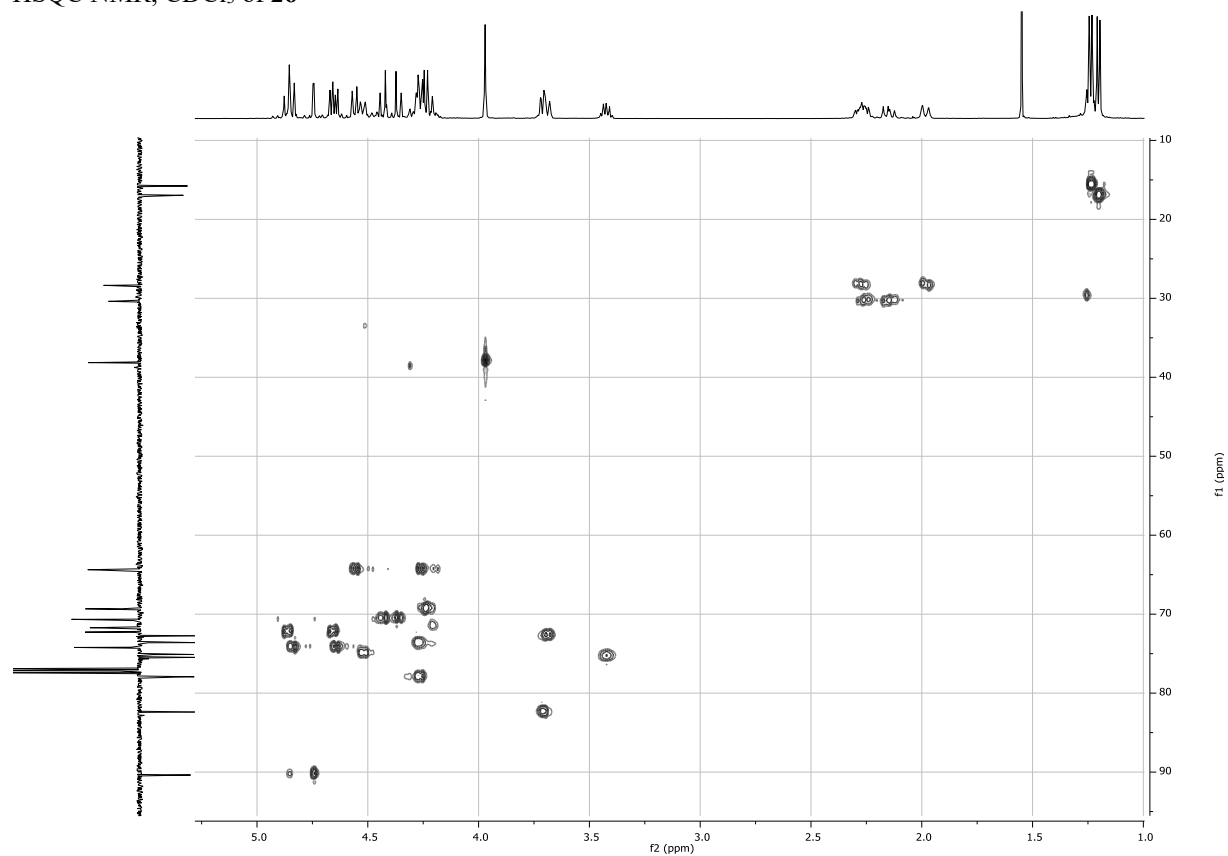

NOESY NMR, CDCl<sub>3</sub> of **26**

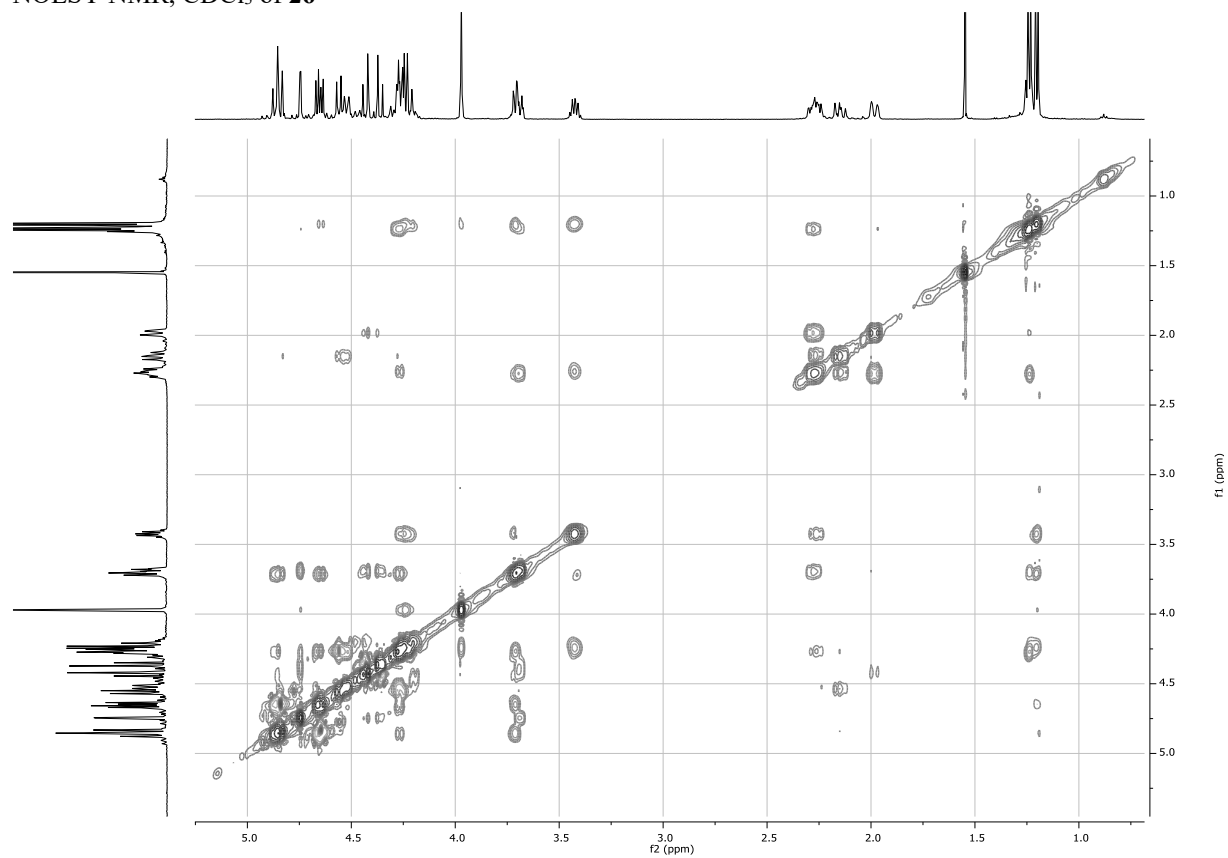

HMBC NMR, CDCl<sub>3</sub> of **26**

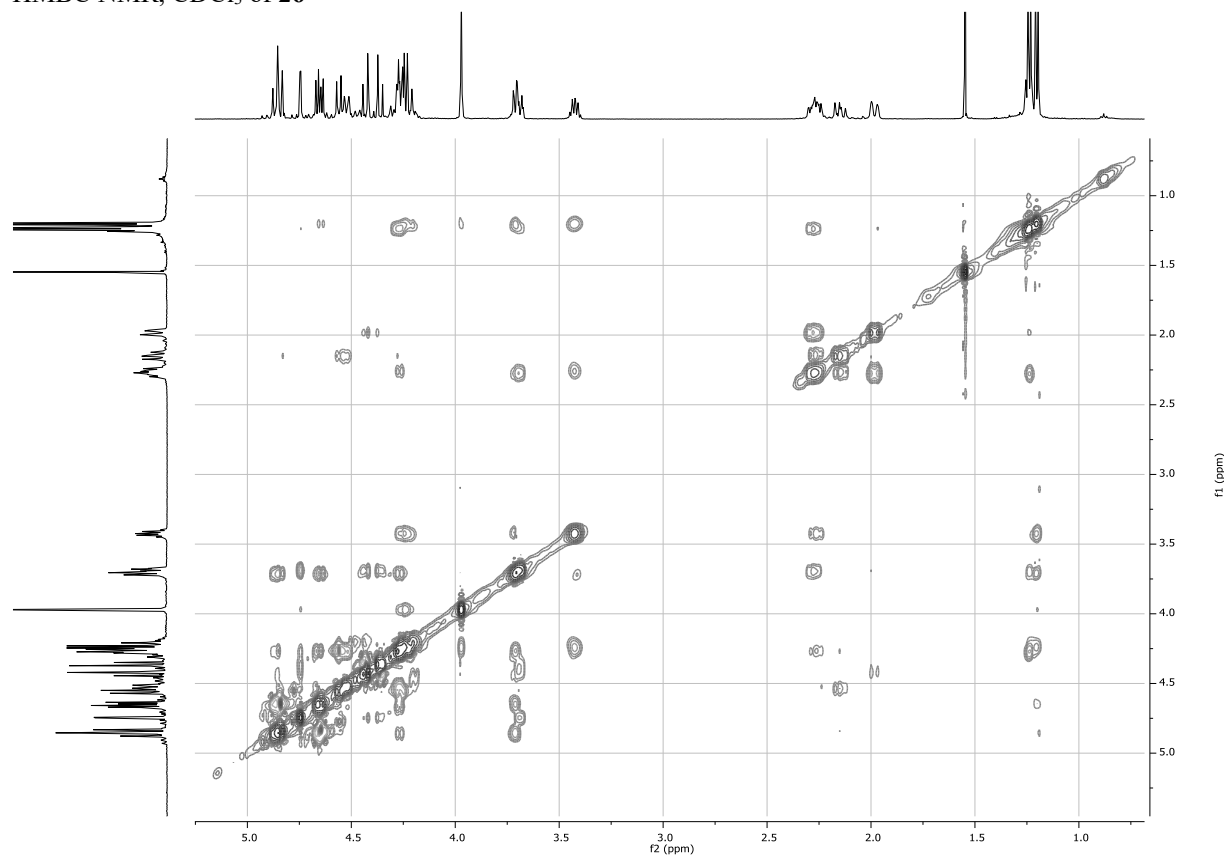

<sup>1</sup>H NMR, 400 MHz, CDCl<sub>3</sub> of **S68**

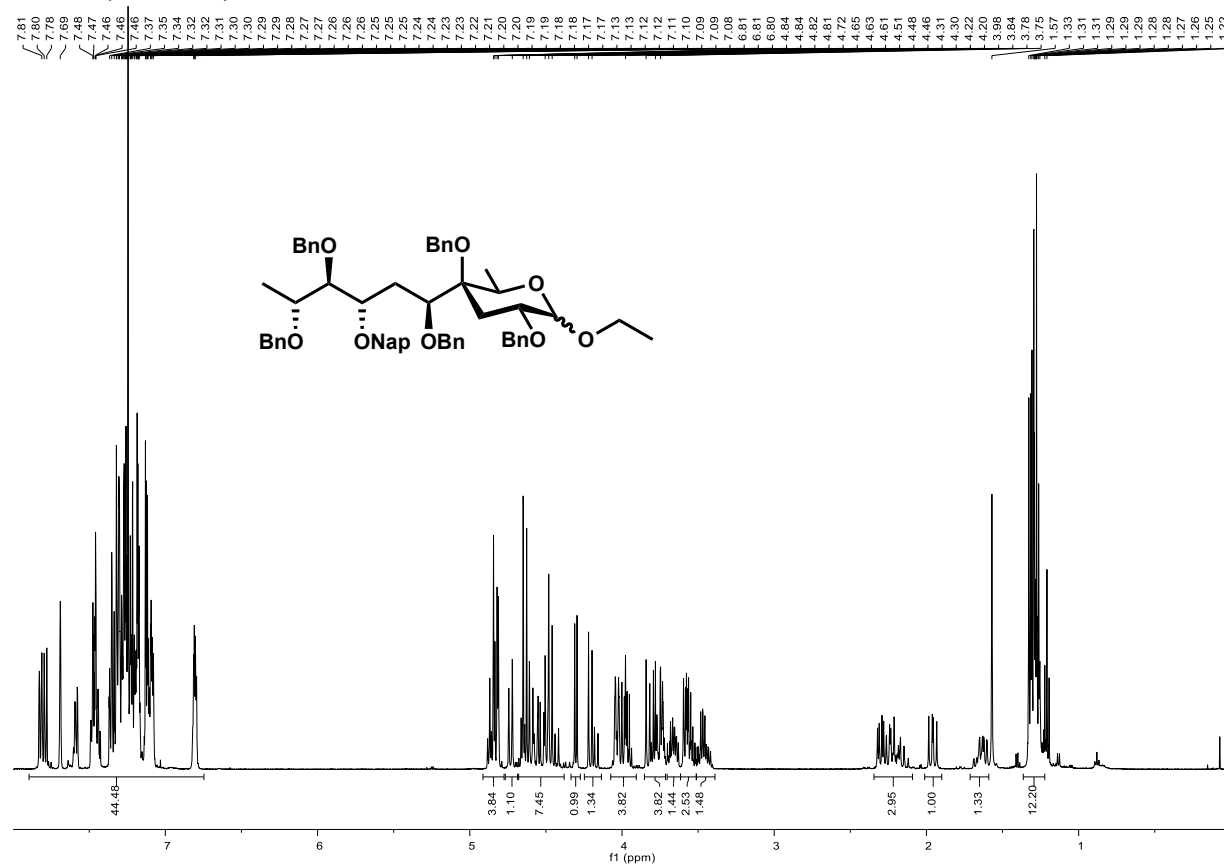

<sup>13</sup>C NMR, 101 MHz, CDCl<sub>3</sub> of S68

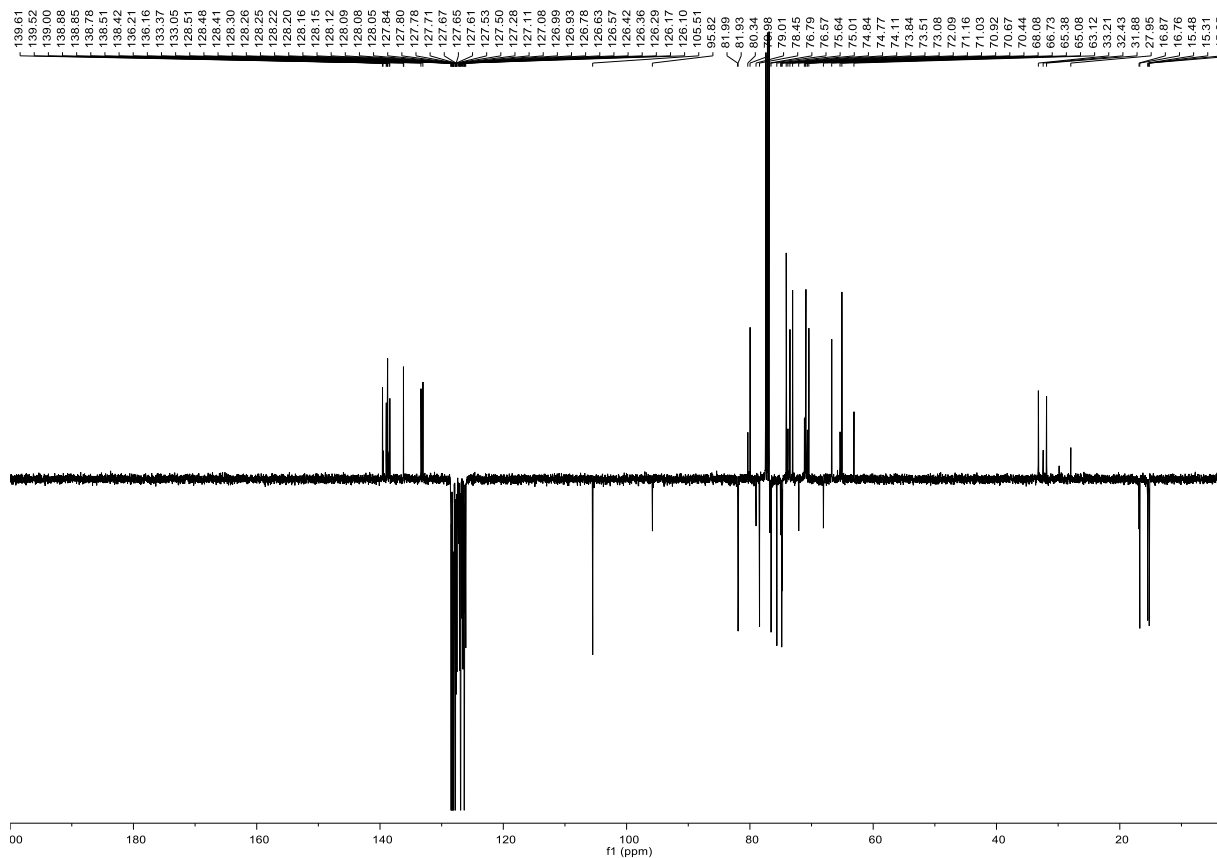

HH-COSY NMR, CDCl<sub>3</sub> of S68

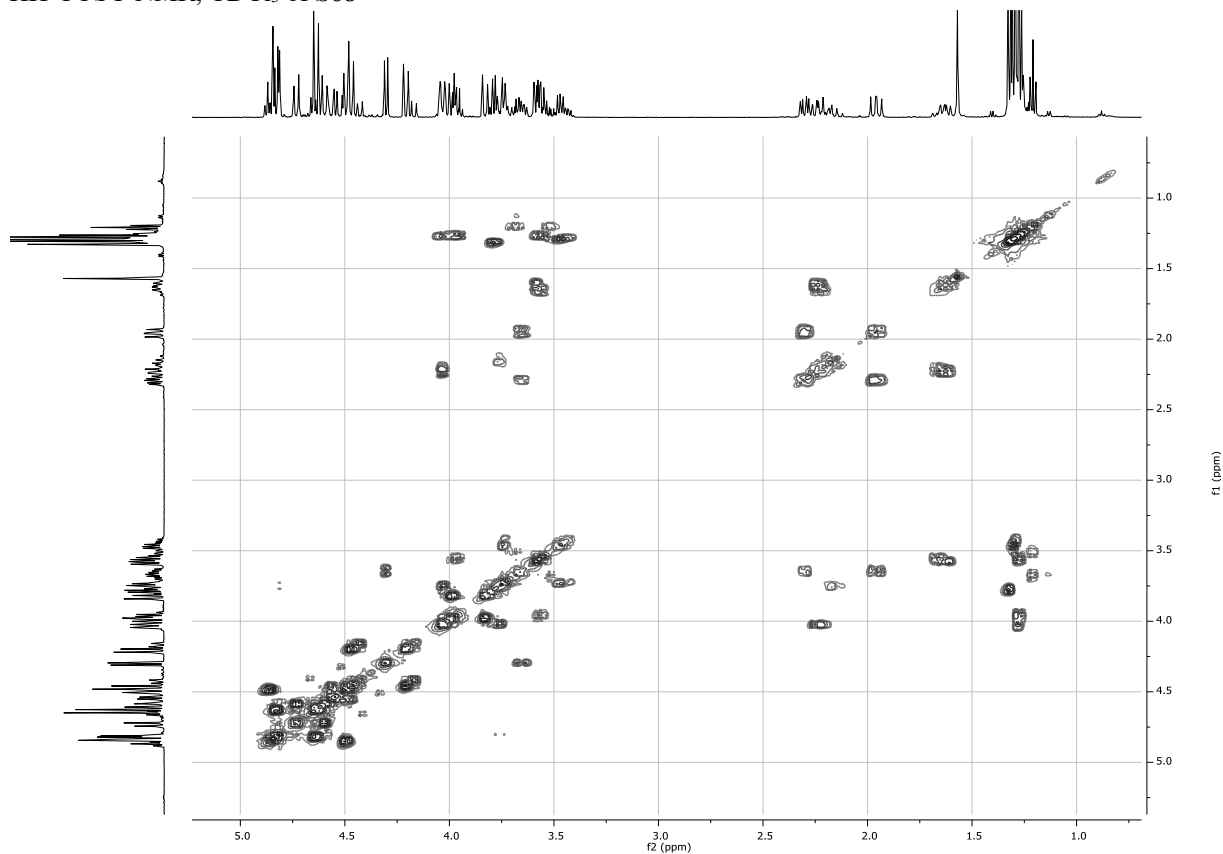



HSQC NMR, CDCl<sub>3</sub> of **S68**

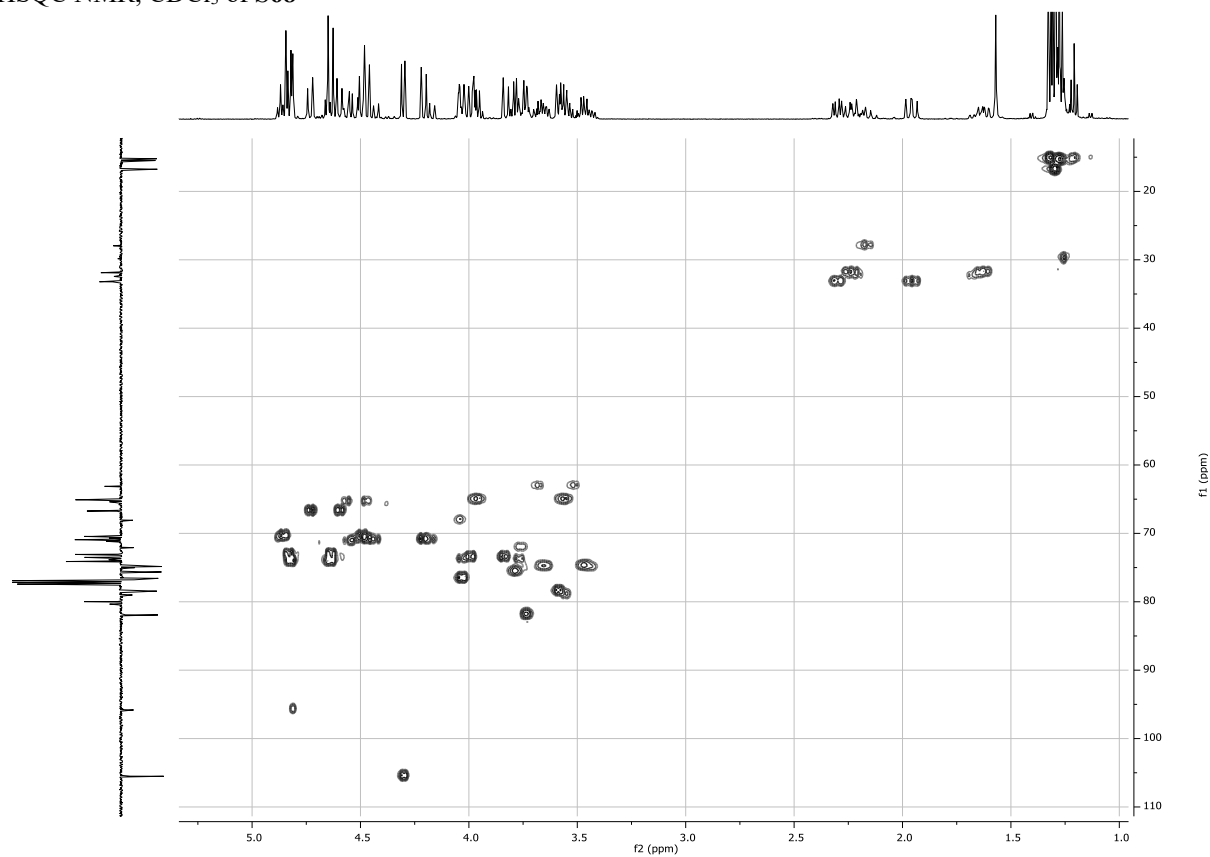

<sup>1</sup>H NMR, 400 MHz, CDCl<sub>3</sub> of **S69**

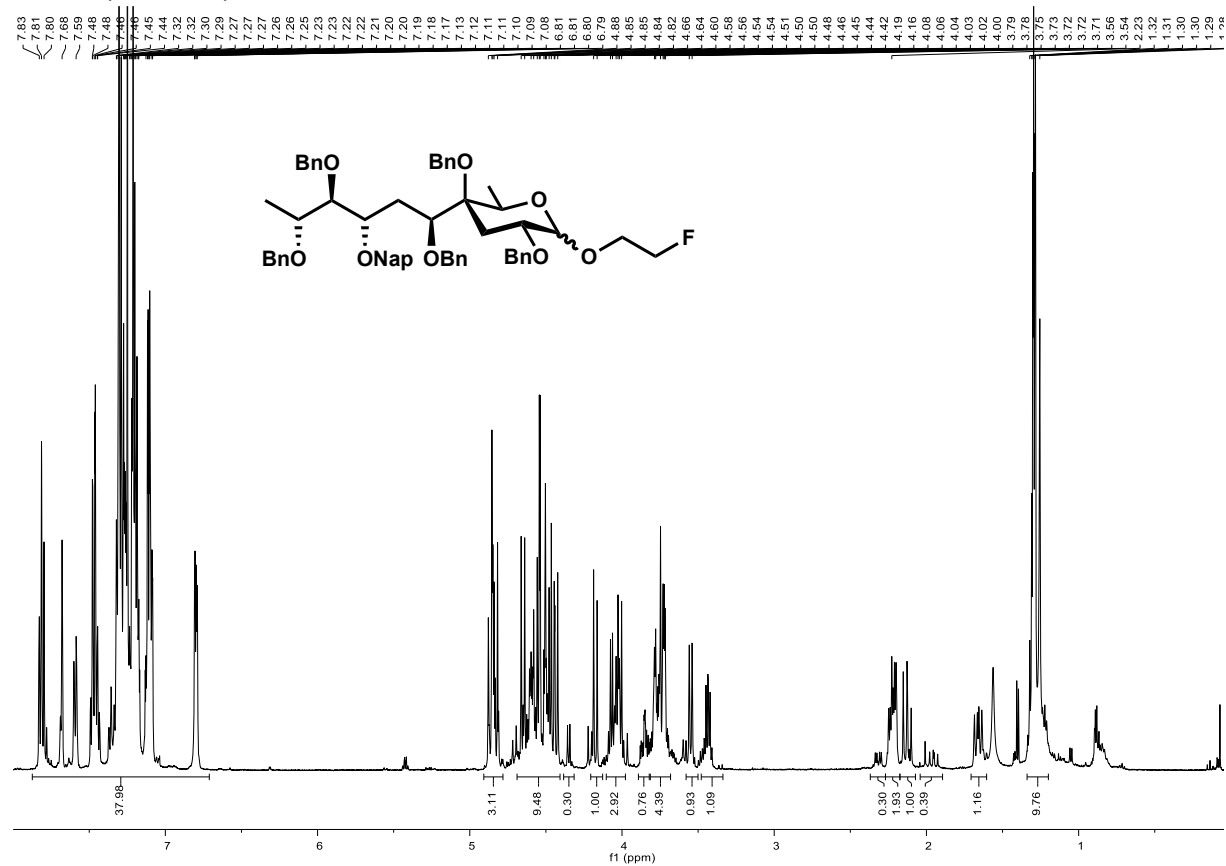

<sup>13</sup>C NMR, 101 MHz, CDCl<sub>3</sub> of S69

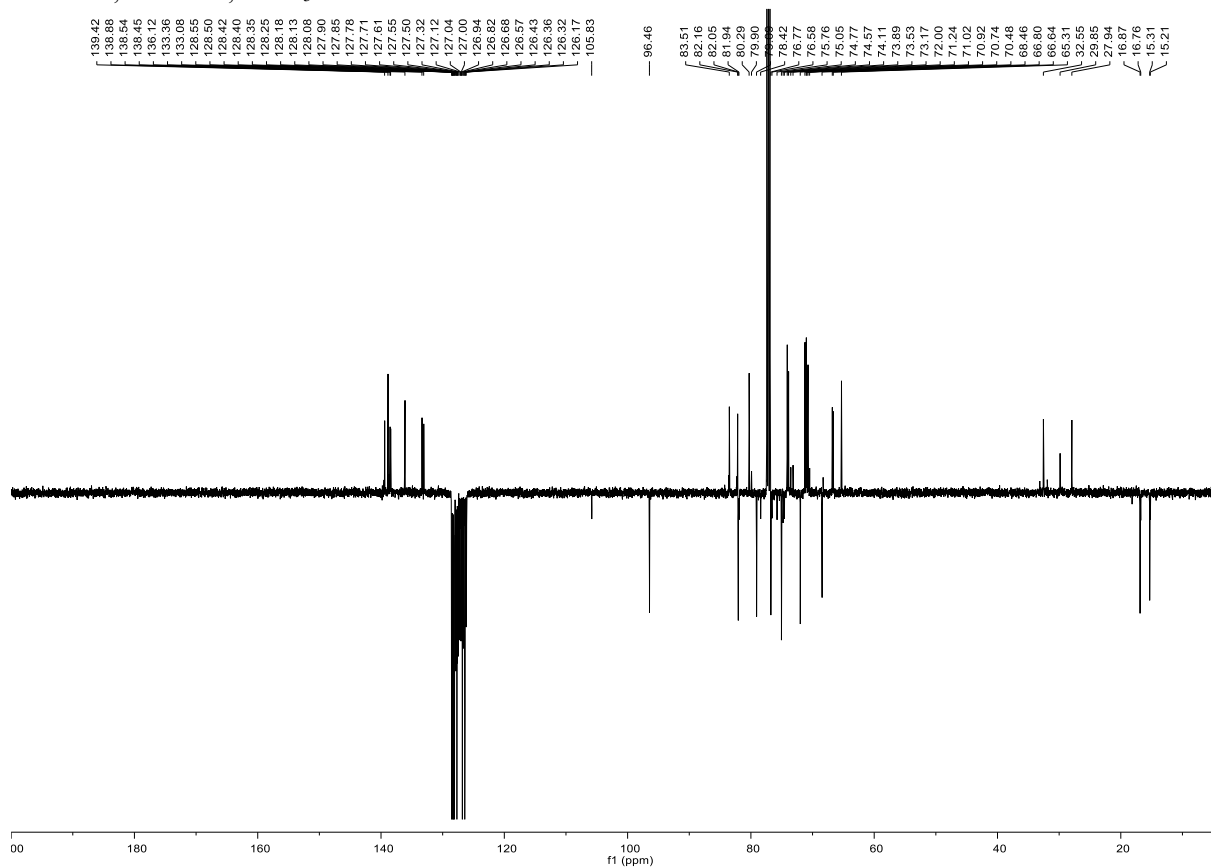

HH-COSY NMR, CDCl<sub>3</sub> of S69

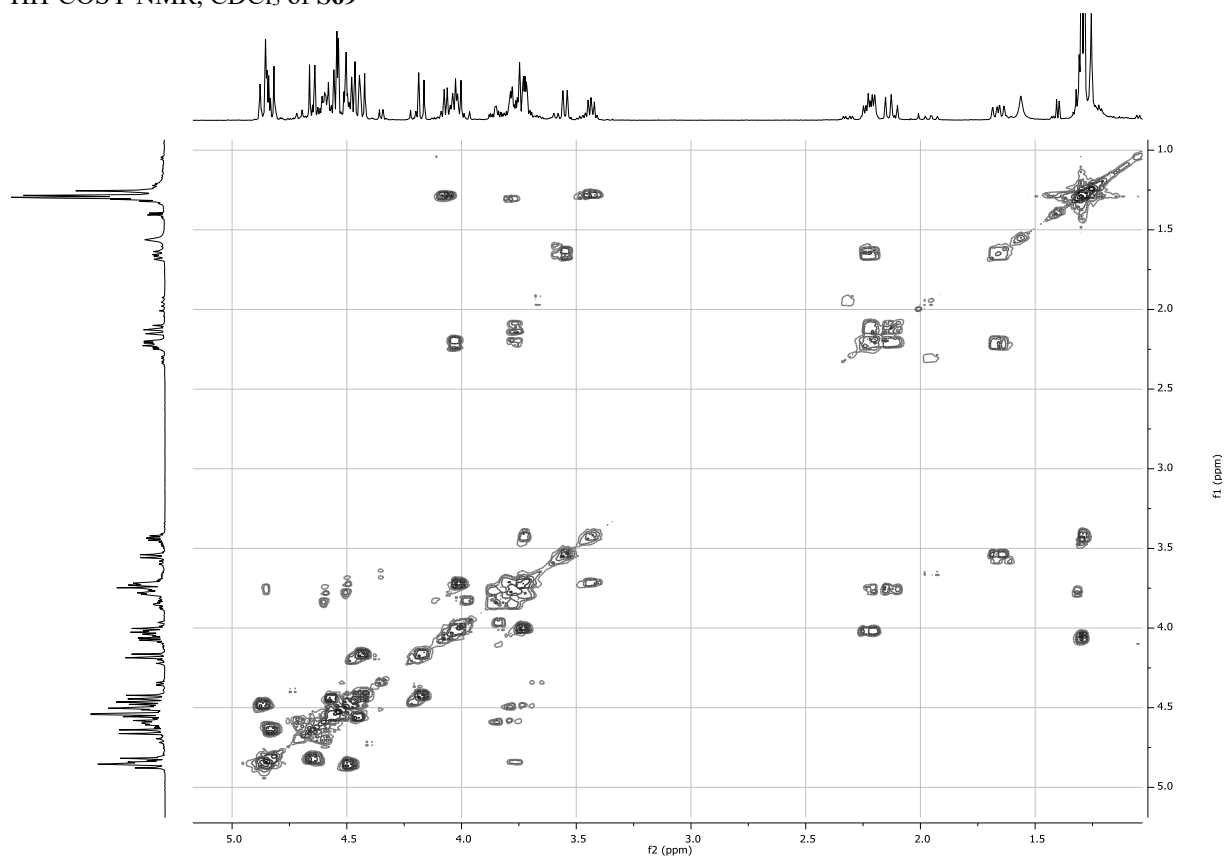

HSQC NMR, CDCl<sub>3</sub> of **S69**

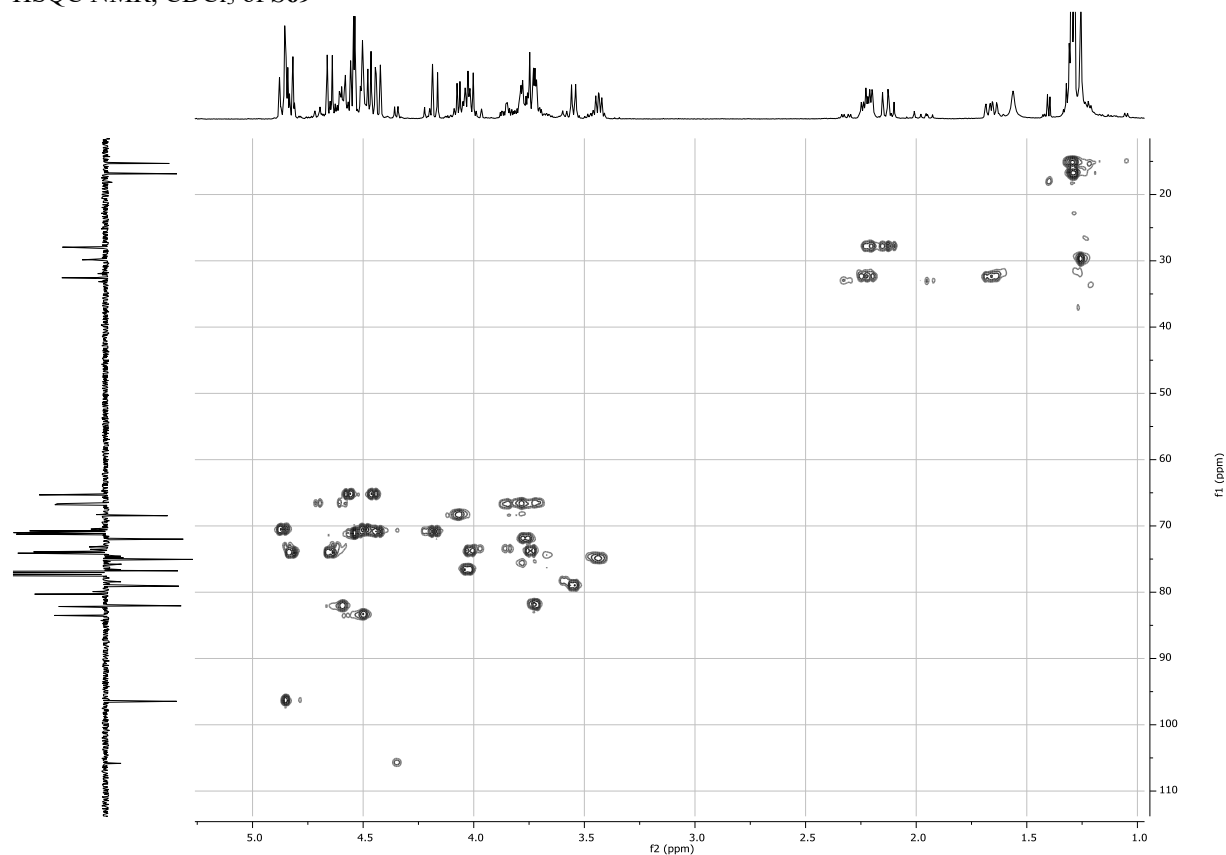

<sup>1</sup>H NMR, 400 MHz, CDCl<sub>3</sub> of **S70**

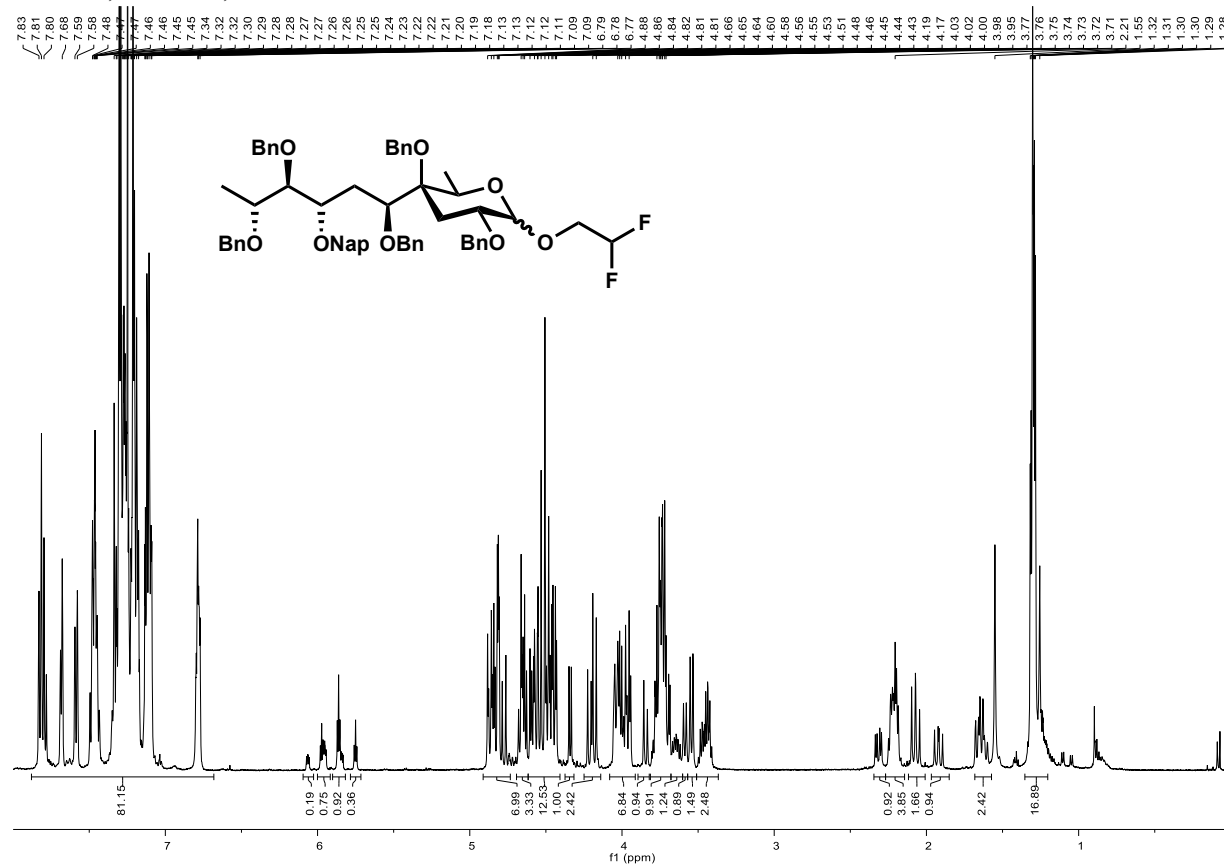

<sup>13</sup>C NMR, 101 MHz, CDCl<sub>3</sub> of S70

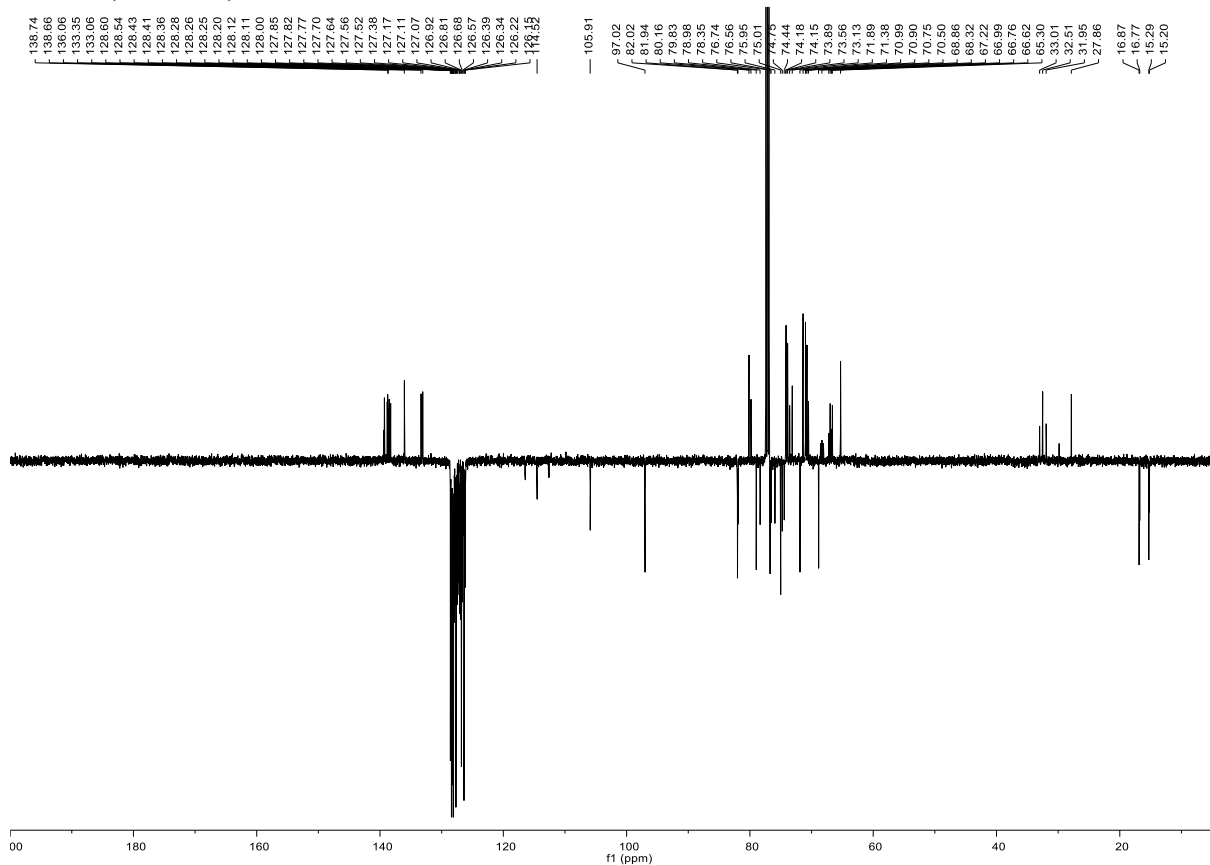

HH-COSY NMR, CDCl<sub>3</sub> of S70

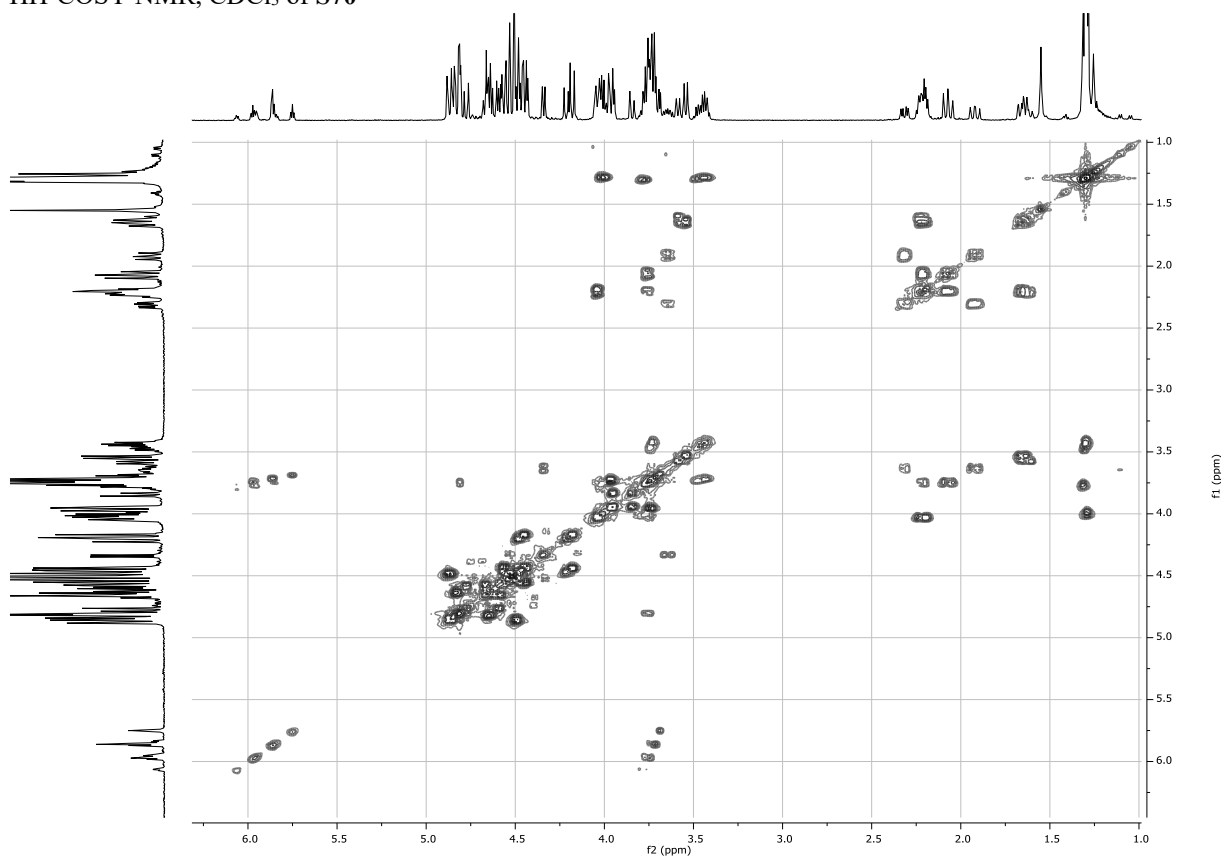

HSQC NMR, CDCl<sub>3</sub> of **S70**

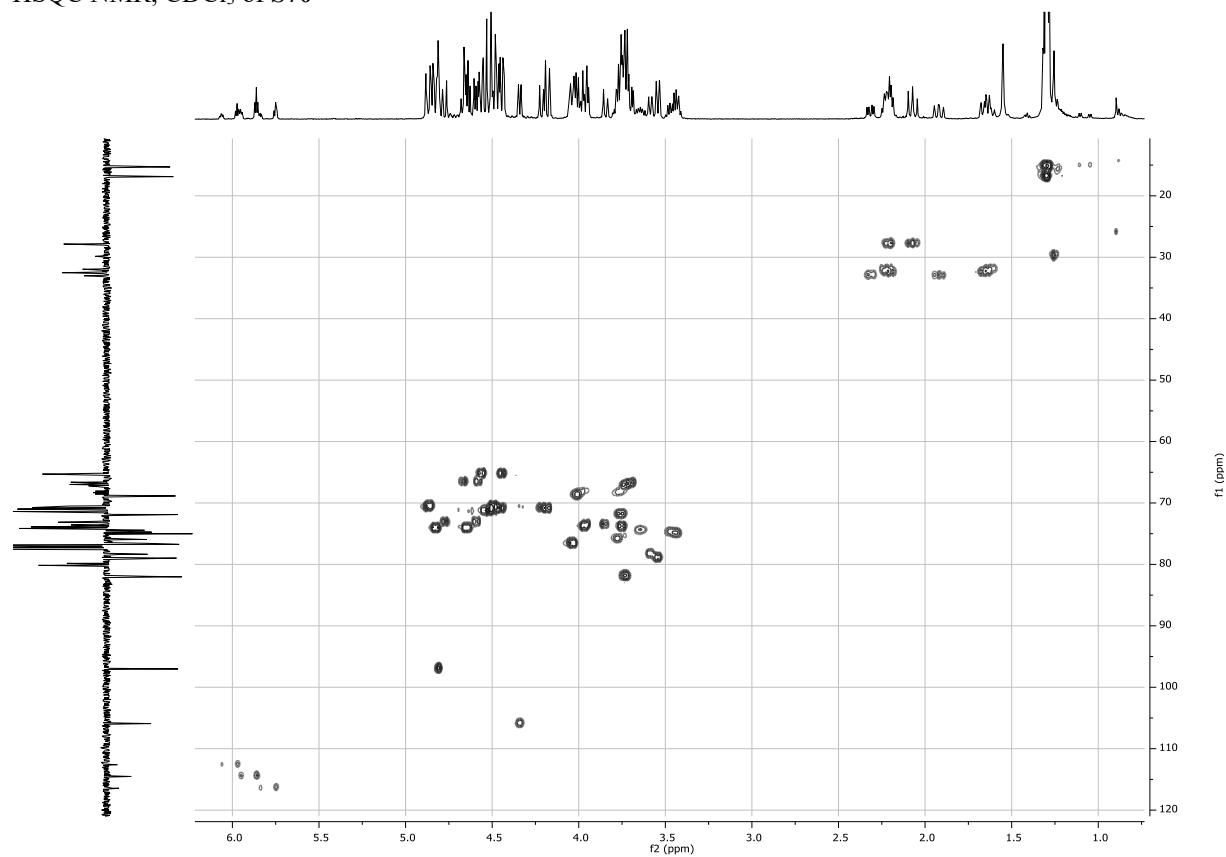

<sup>1</sup>H NMR, 400 MHz, CDCl<sub>3</sub> of **S71**

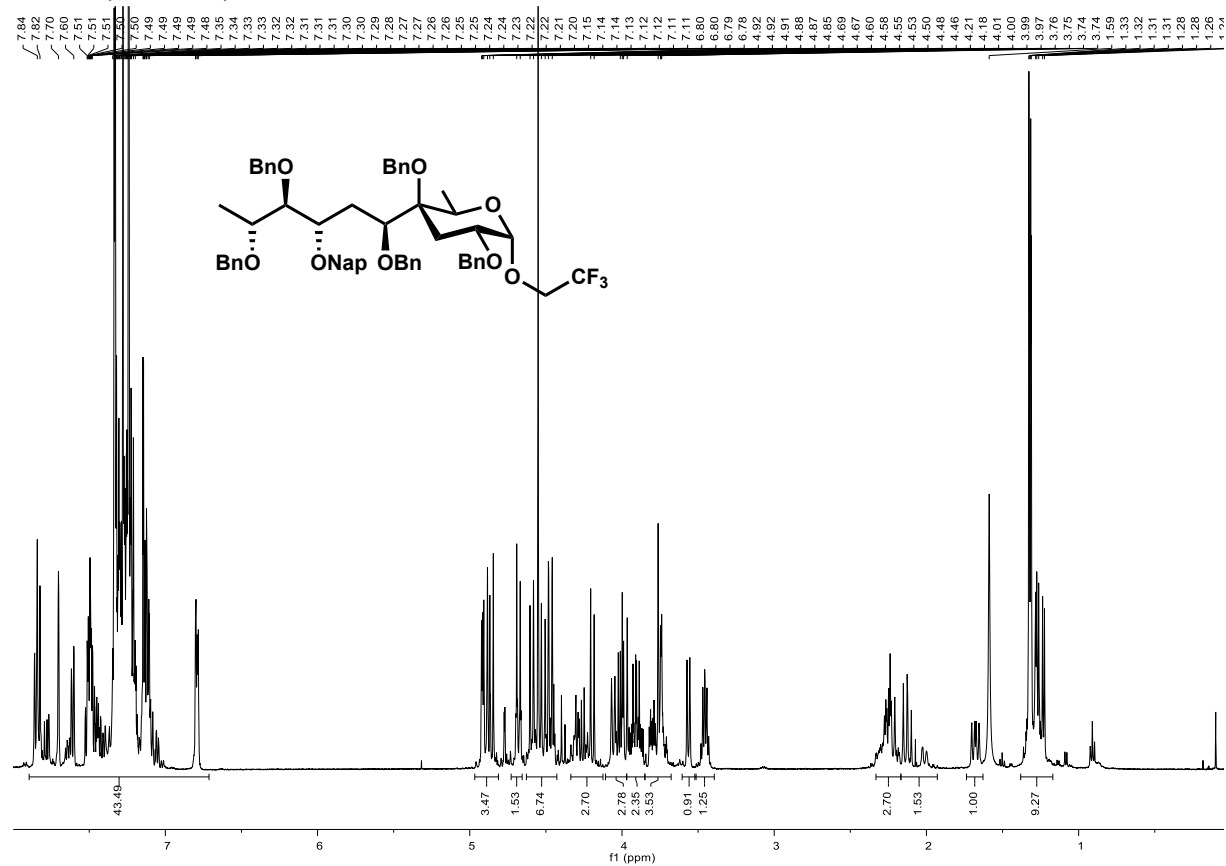

<sup>13</sup>C NMR, 101 MHz, CDCl<sub>3</sub> of S71

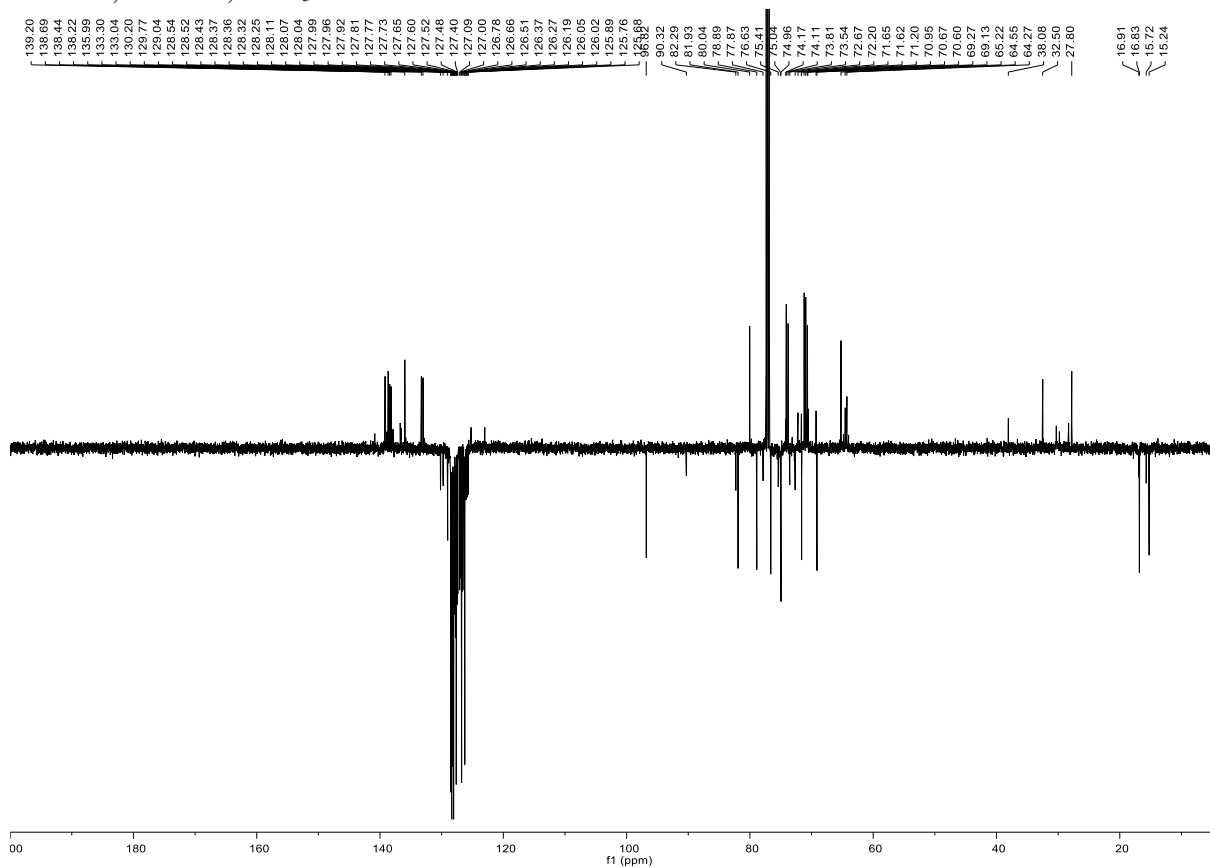

HH-COSY NMR, CDCl<sub>3</sub> of S71

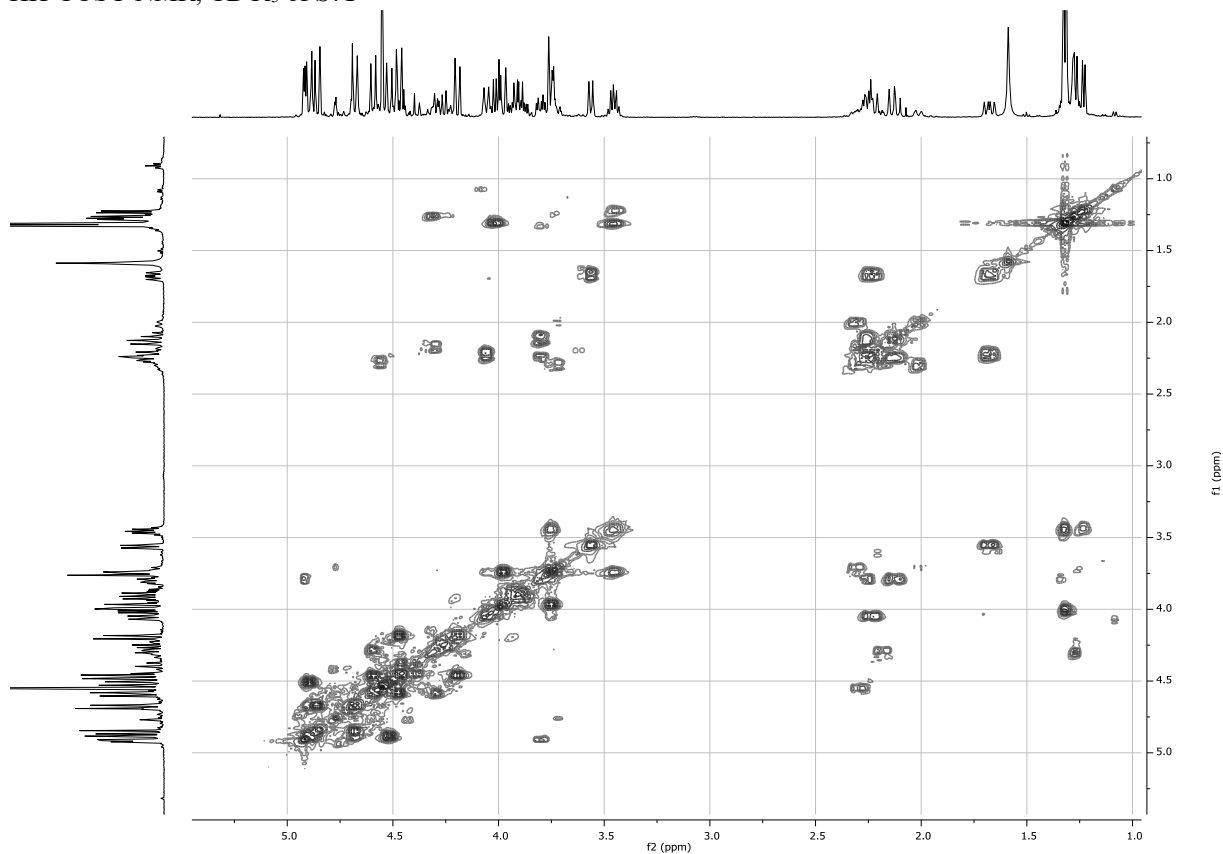

HSQC NMR, CDCl<sub>3</sub> of **S71**

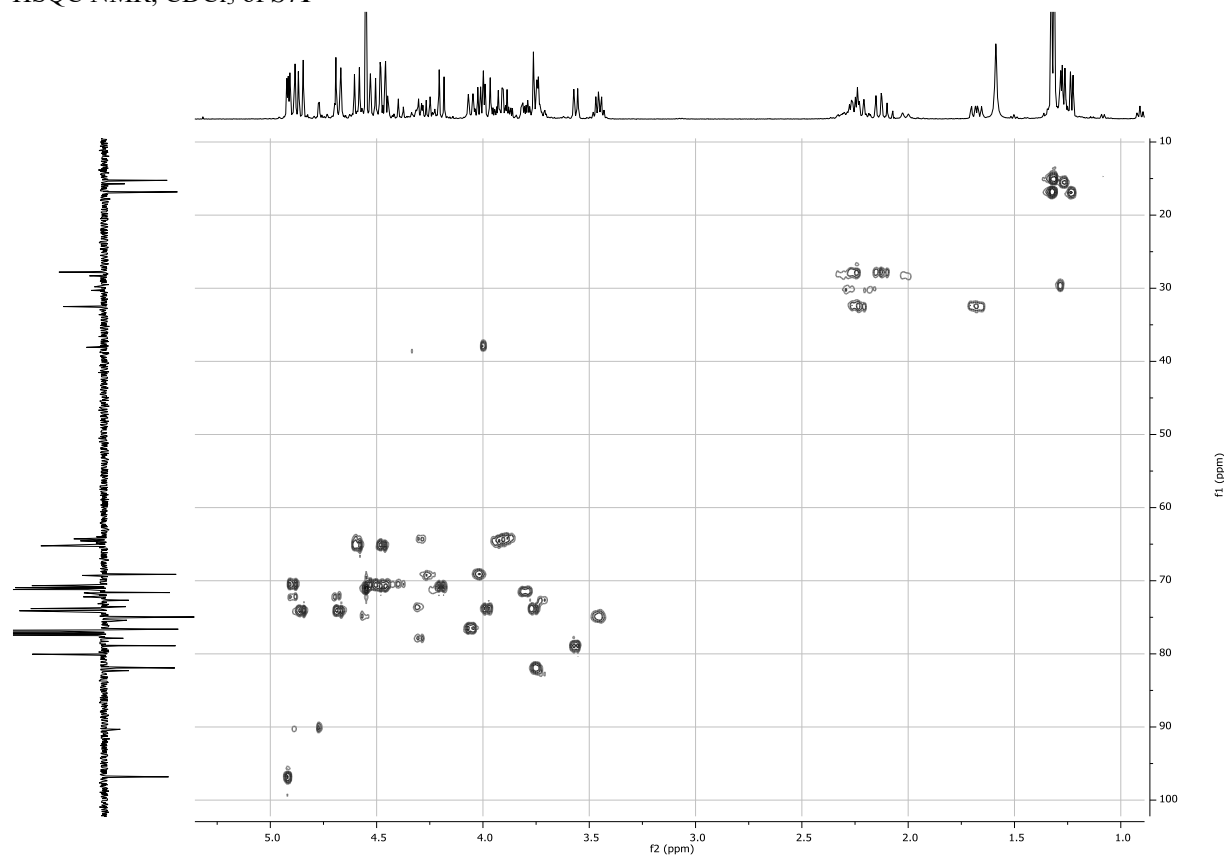

<sup>1</sup>H NMR, 400 MHz, CDCl<sub>3</sub> of **S72**

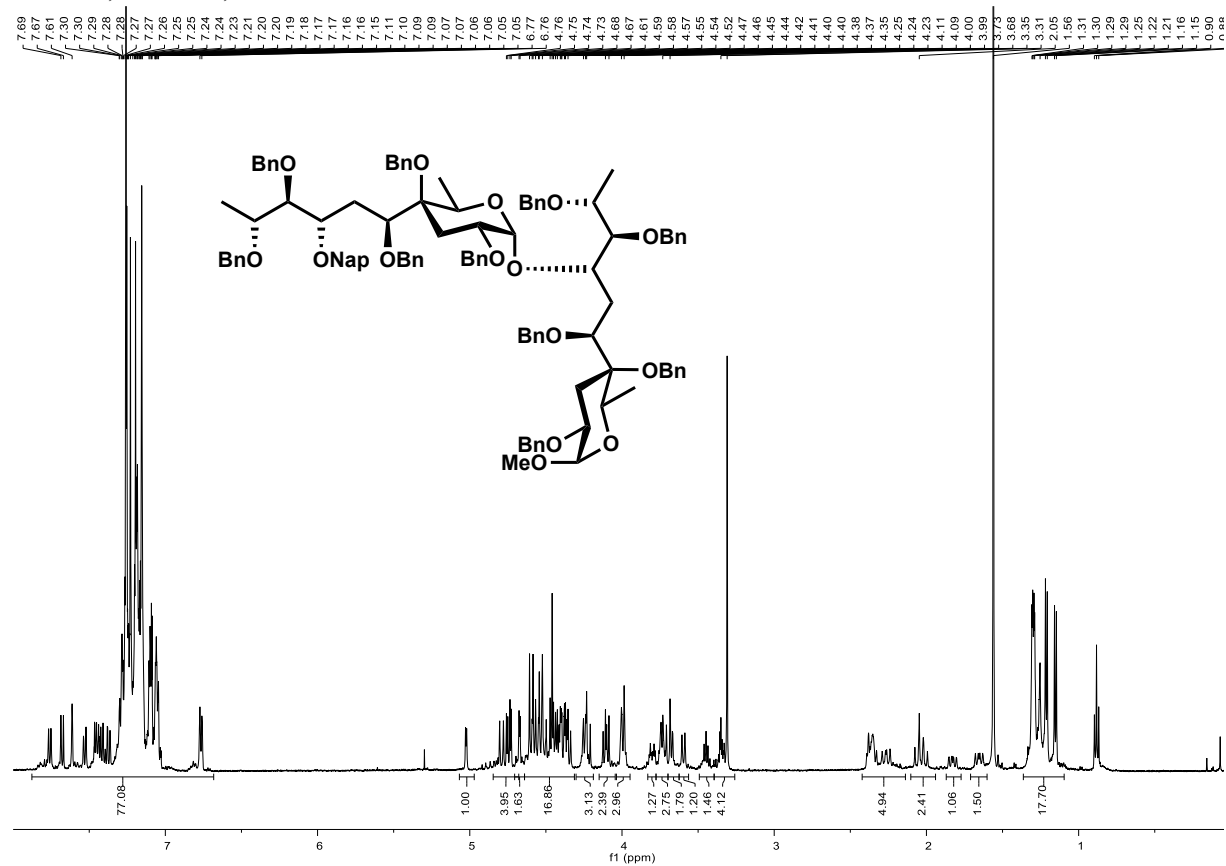

<sup>13</sup>C NMR, 101 MHz, CDCl<sub>3</sub> of S72

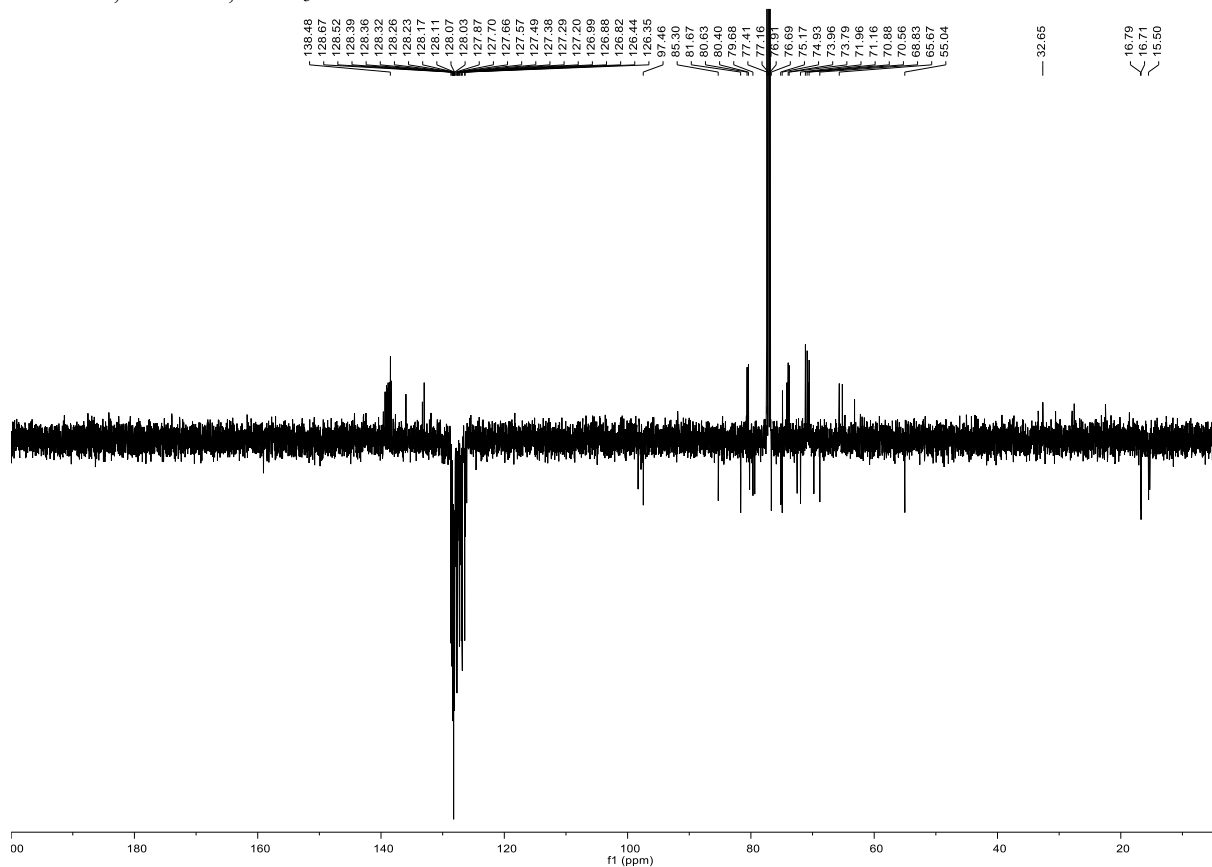

HH-COSY NMR, CDCl<sub>3</sub> of S72

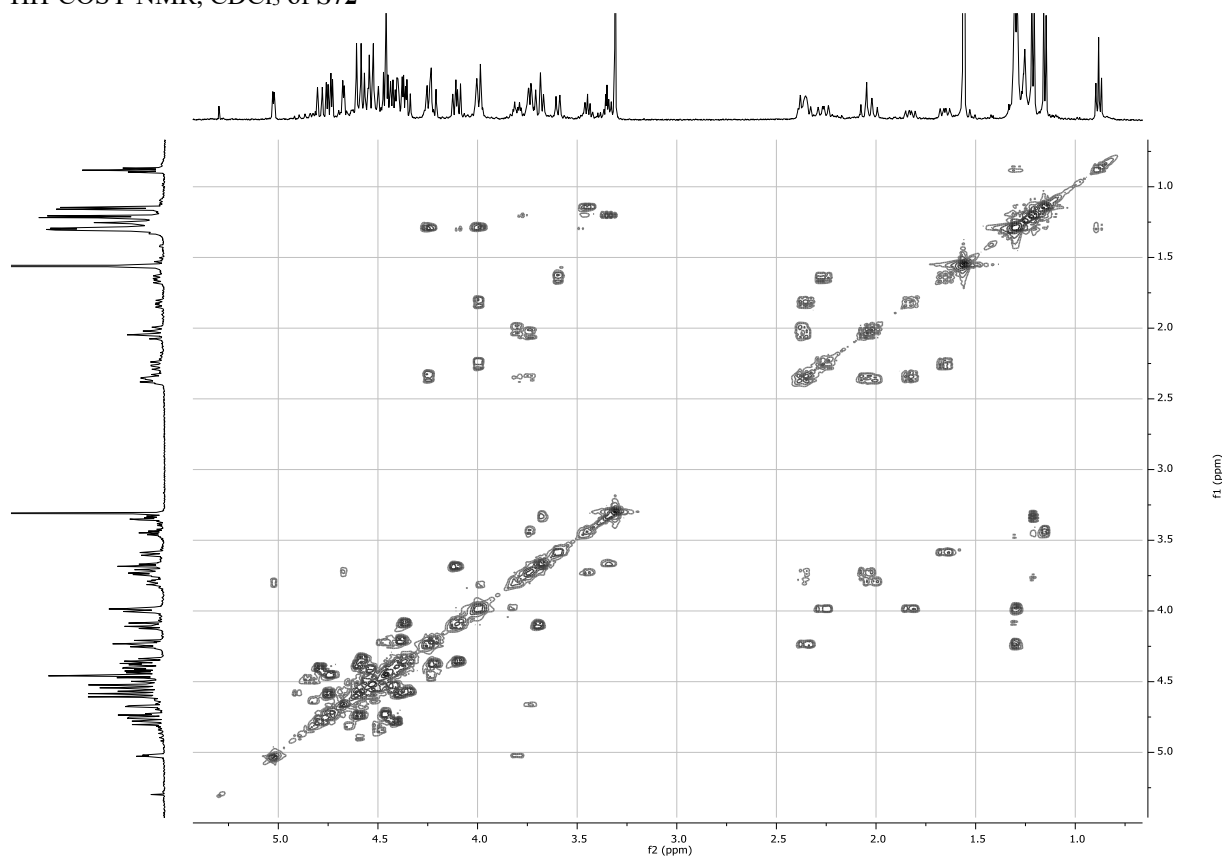



HSQC NMR, CDCl<sub>3</sub> of S72

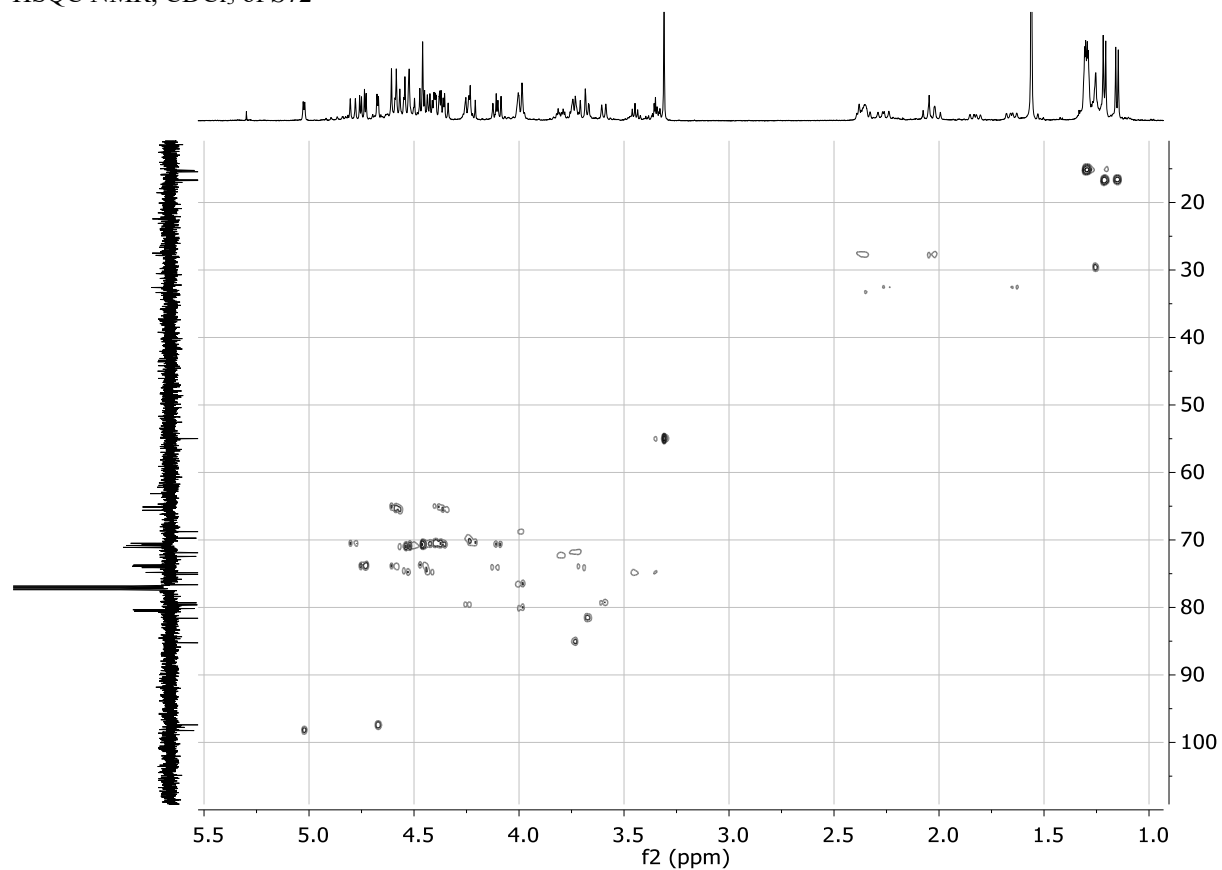

HMBC NMR, CDCl<sub>3</sub> of S72

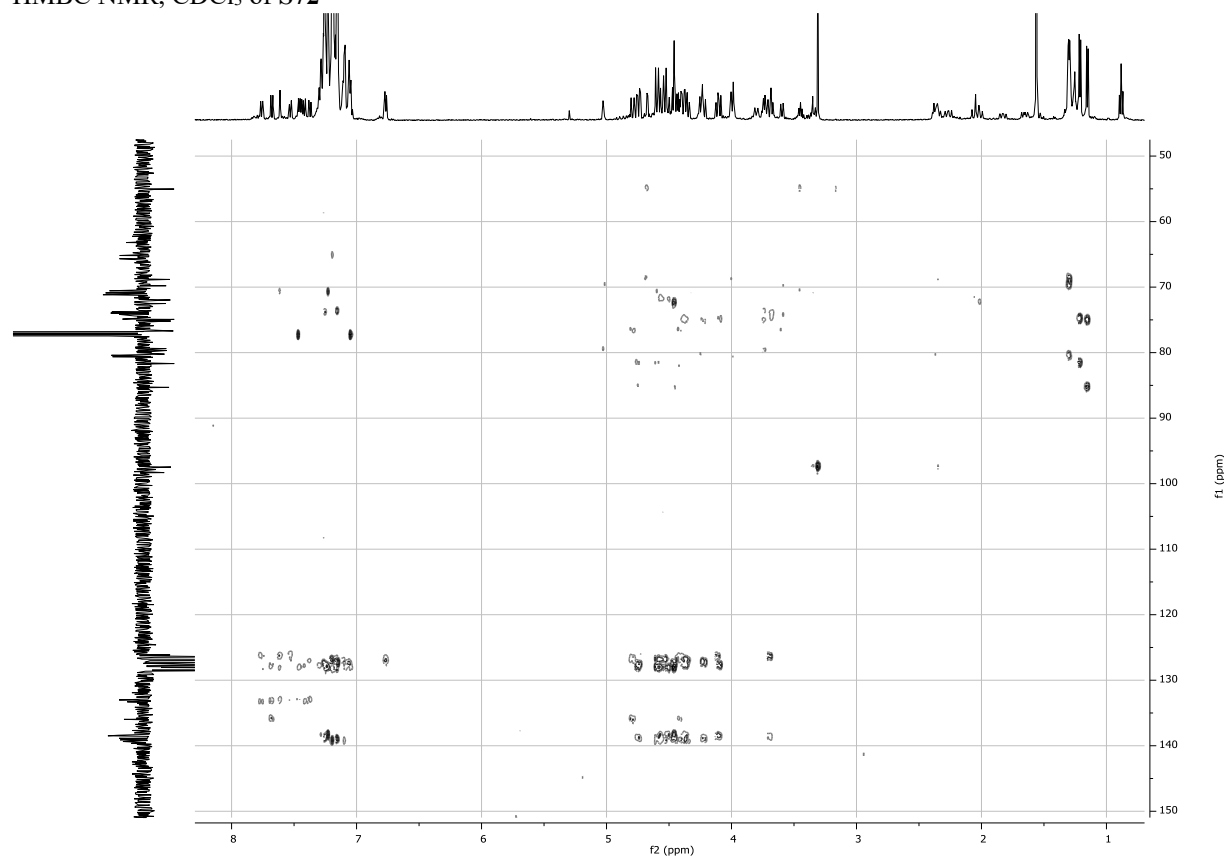

HMBC-GATED NMR, CDCl<sub>3</sub> of **S72**

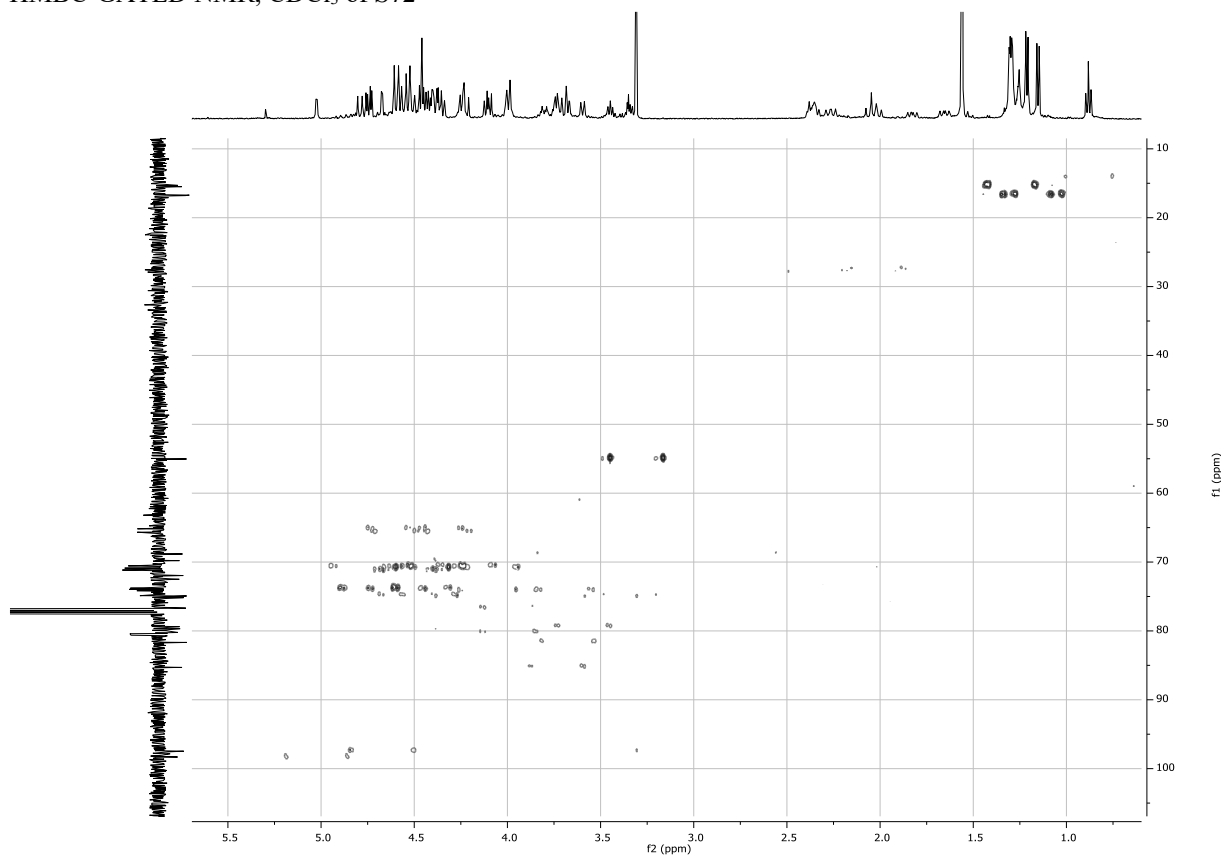

<sup>1</sup>H NMR, 400 MHz, CDCl<sub>3</sub> of **S73**

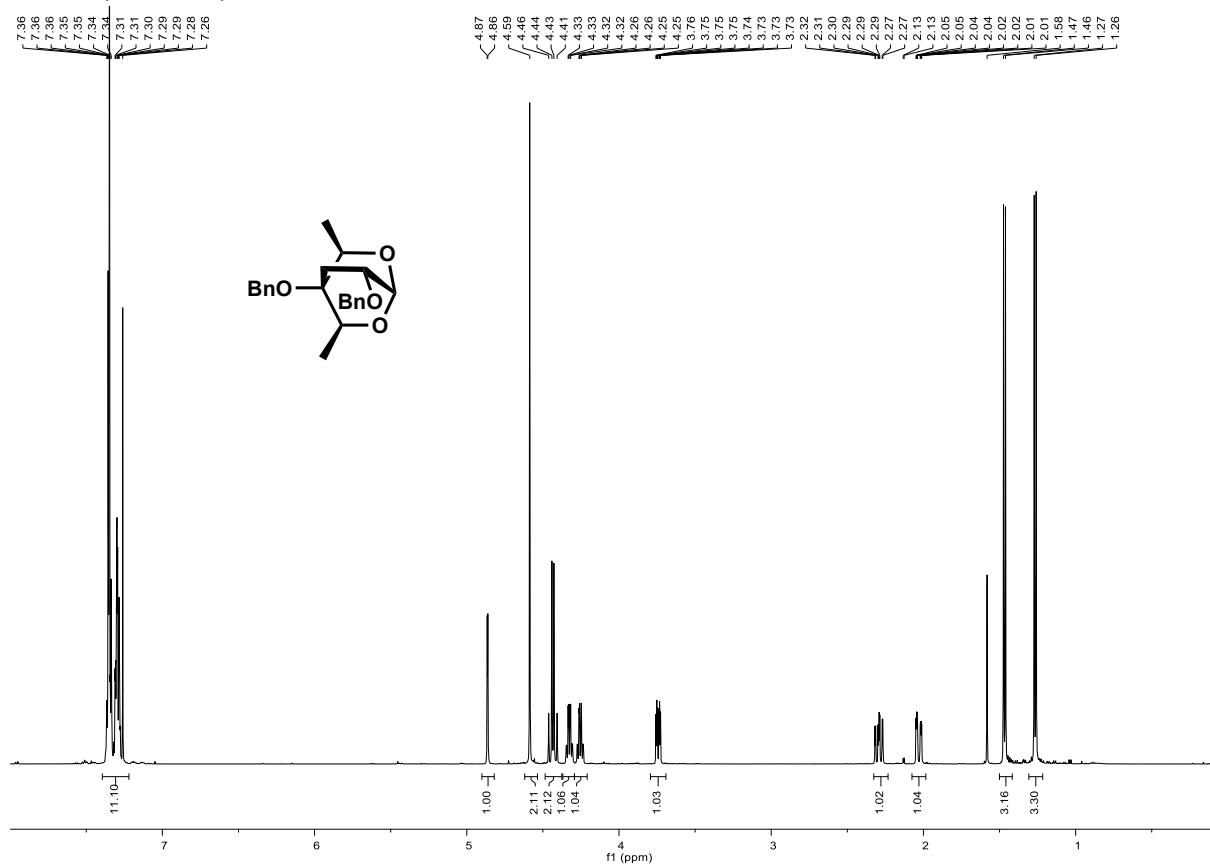

$^{13}\text{C}$  NMR, 101 MHz,  $\text{CDCl}_3$  of **S73**

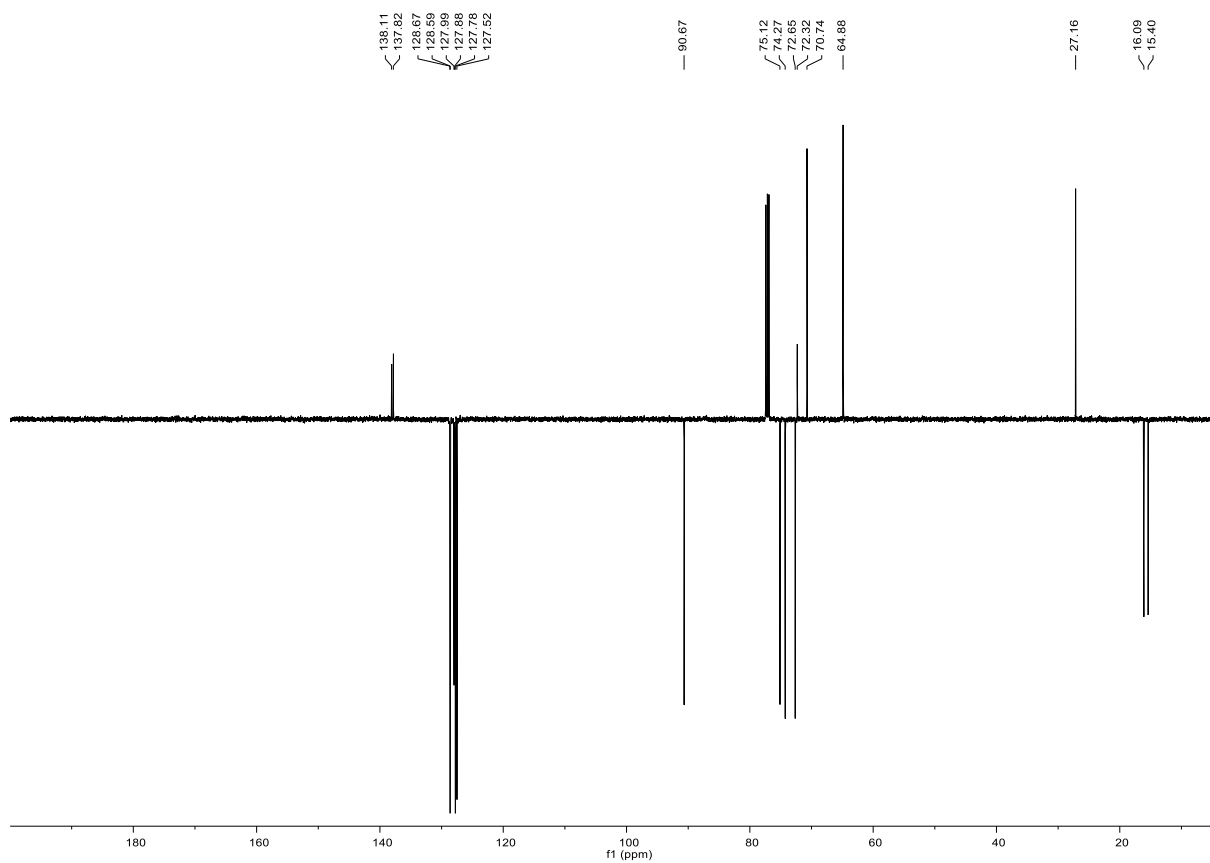

HH-COSY NMR,  $\text{CDCl}_3$  of **S73**

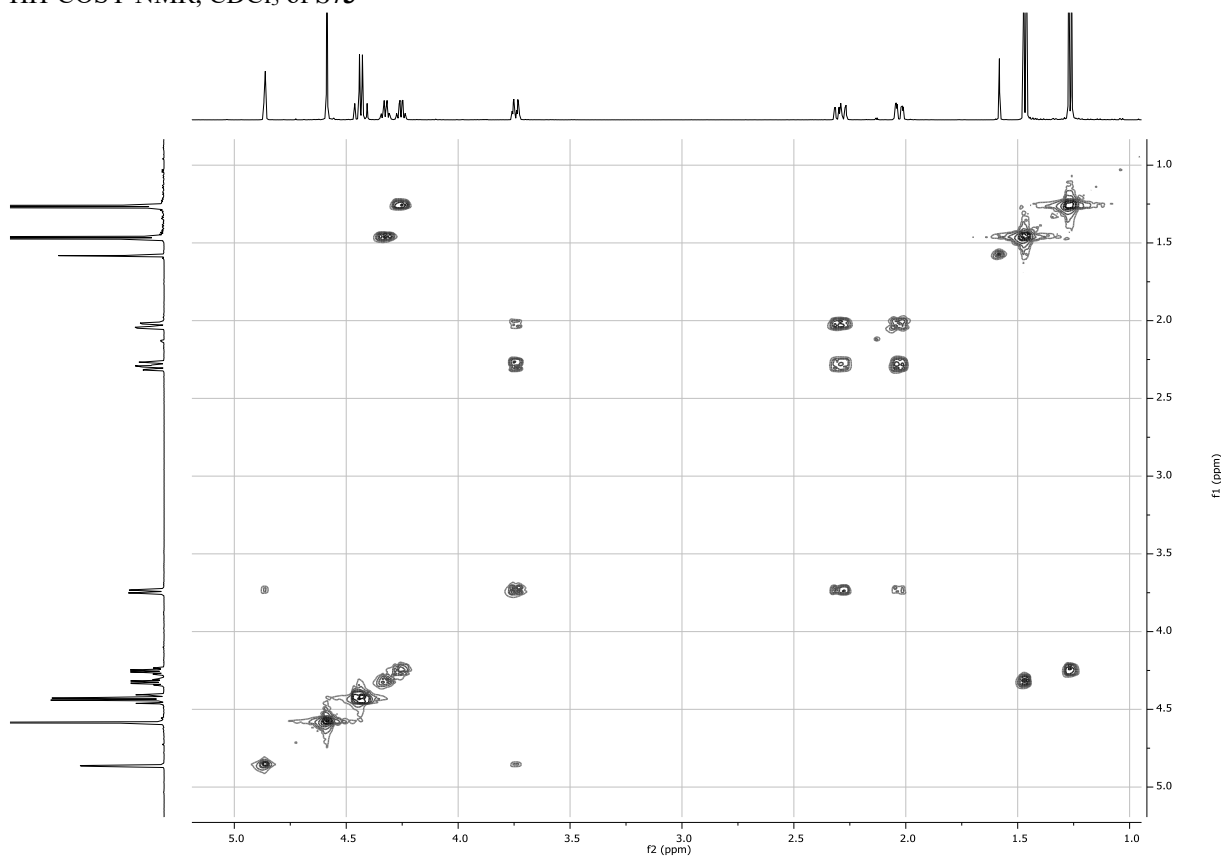

HSQC NMR, CDCl<sub>3</sub> of S73

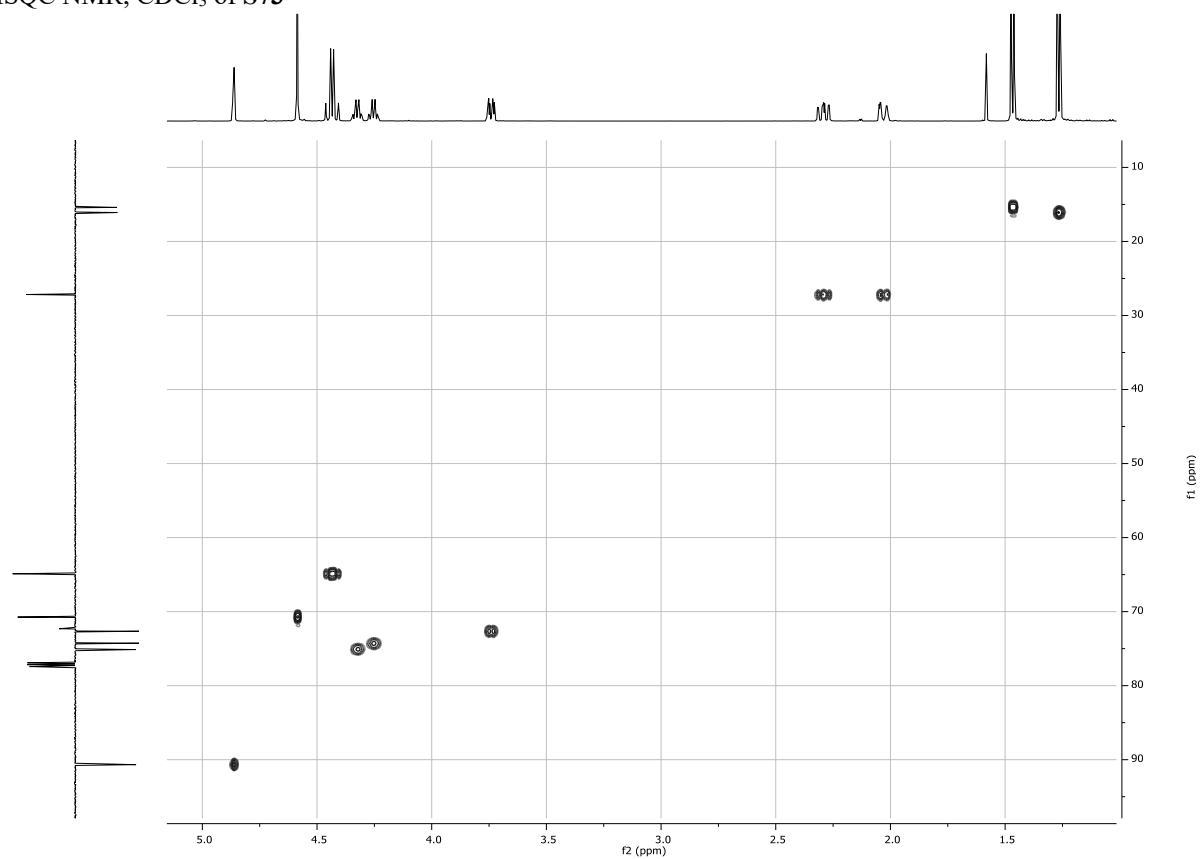

NOESY NMR, CDCl<sub>3</sub> of S73

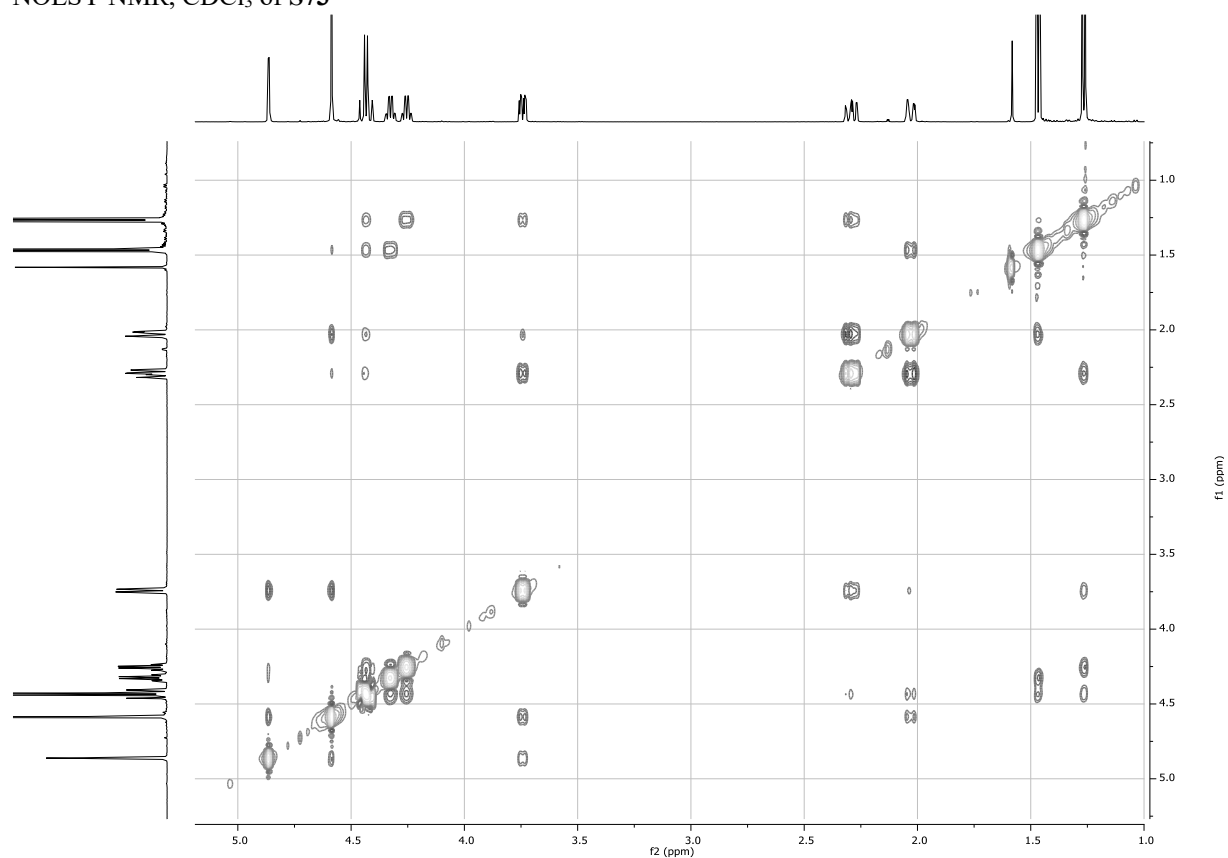

HMBC NMR, CDCl<sub>3</sub> of **S73**

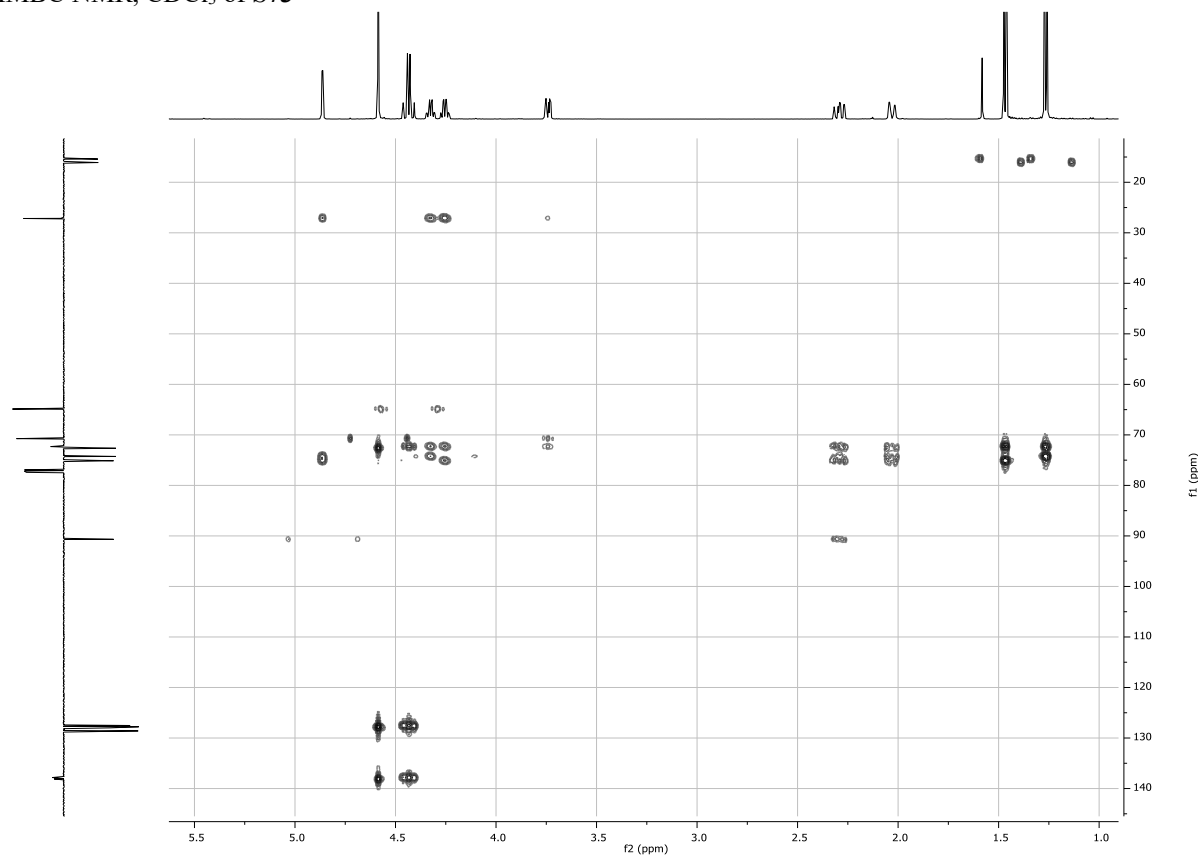

<sup>1</sup>H NMR, 400 MHz, CDCl<sub>3</sub> of **S75**

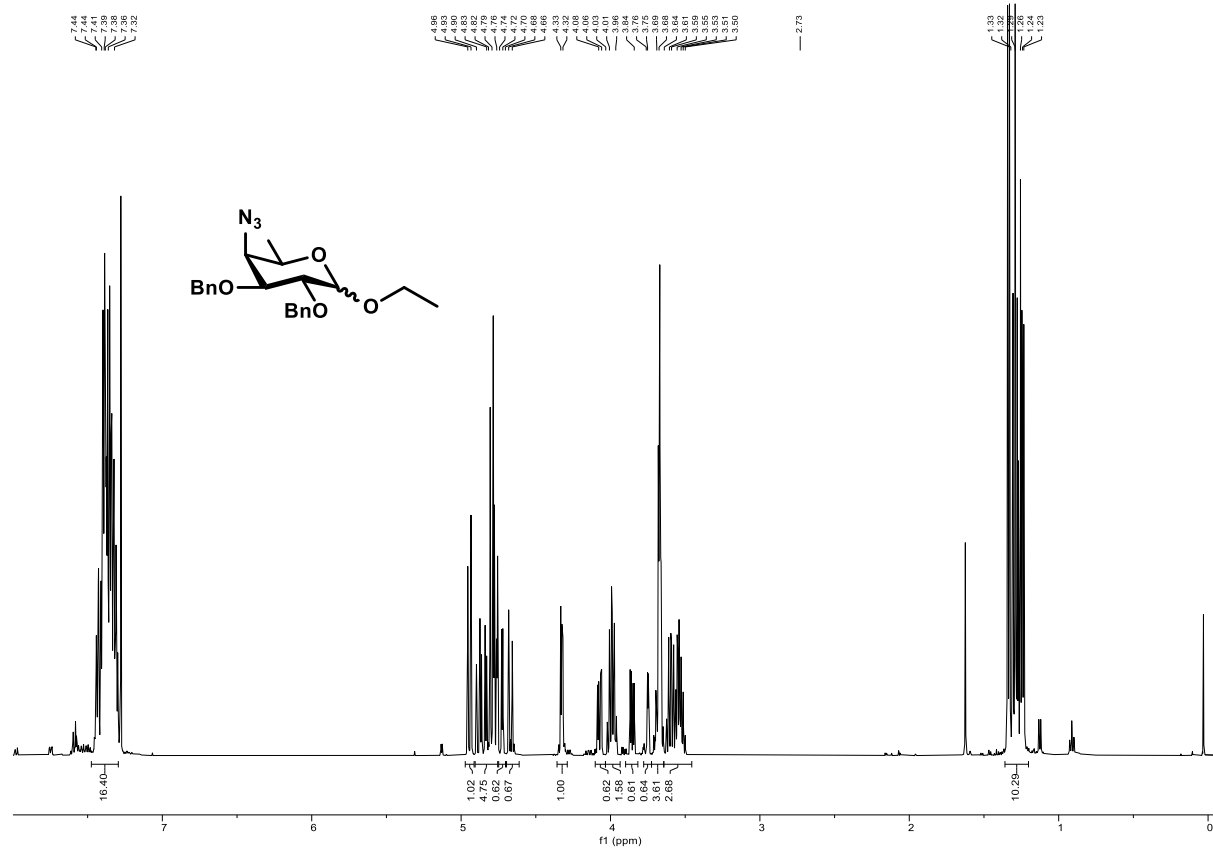

$^{13}\text{C}$  NMR, 101 MHz,  $\text{CDCl}_3$  of **S75**

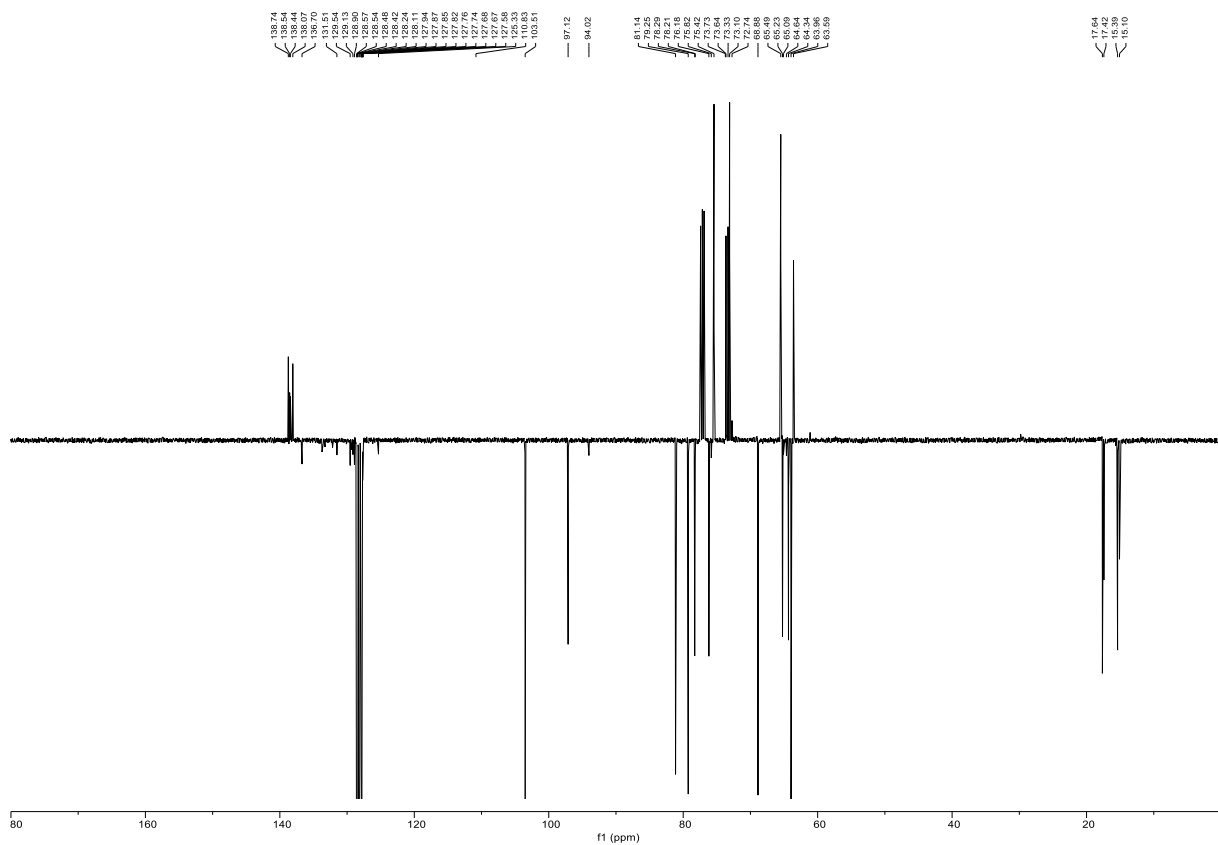

$^1\text{H}$  NMR, 400 MHz,  $\text{CDCl}_3$  of **S76**

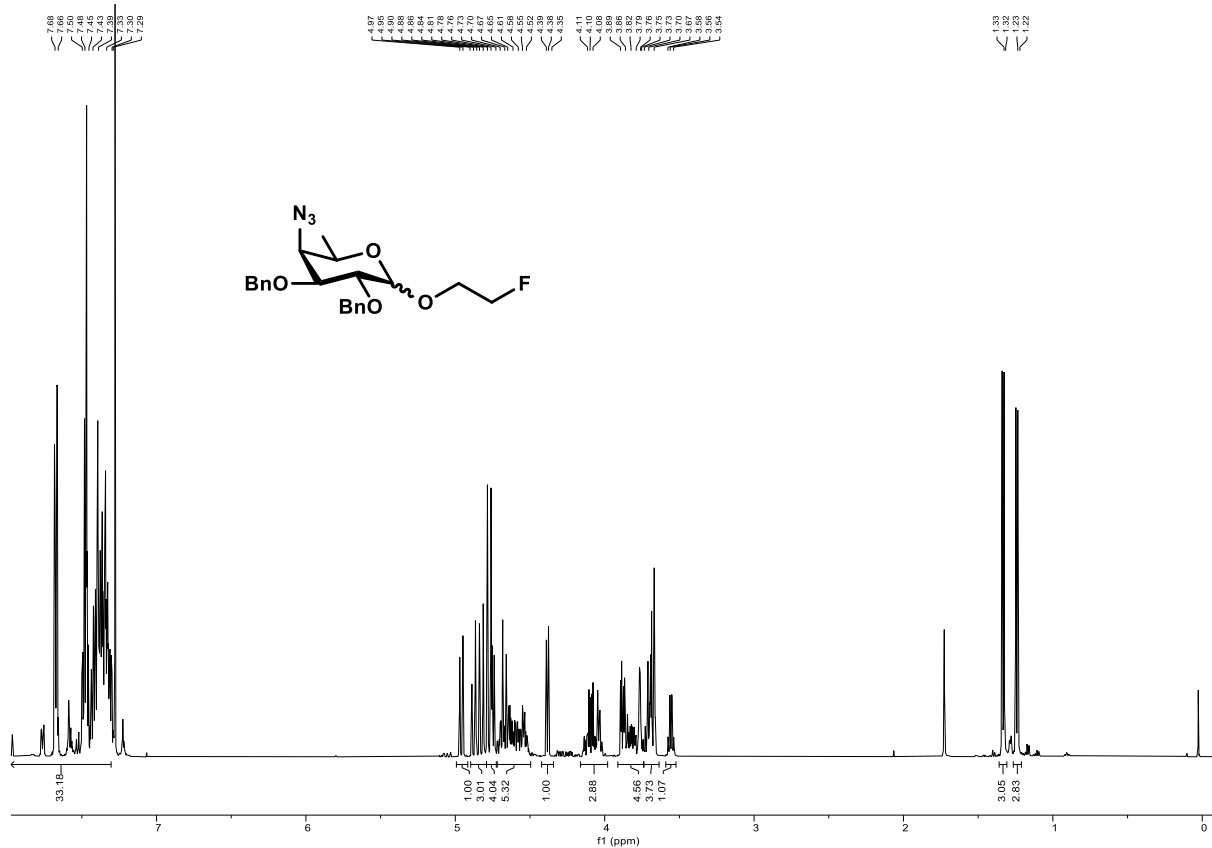

<sup>13</sup>C NMR, 101 MHz, CDCl<sub>3</sub> of S76

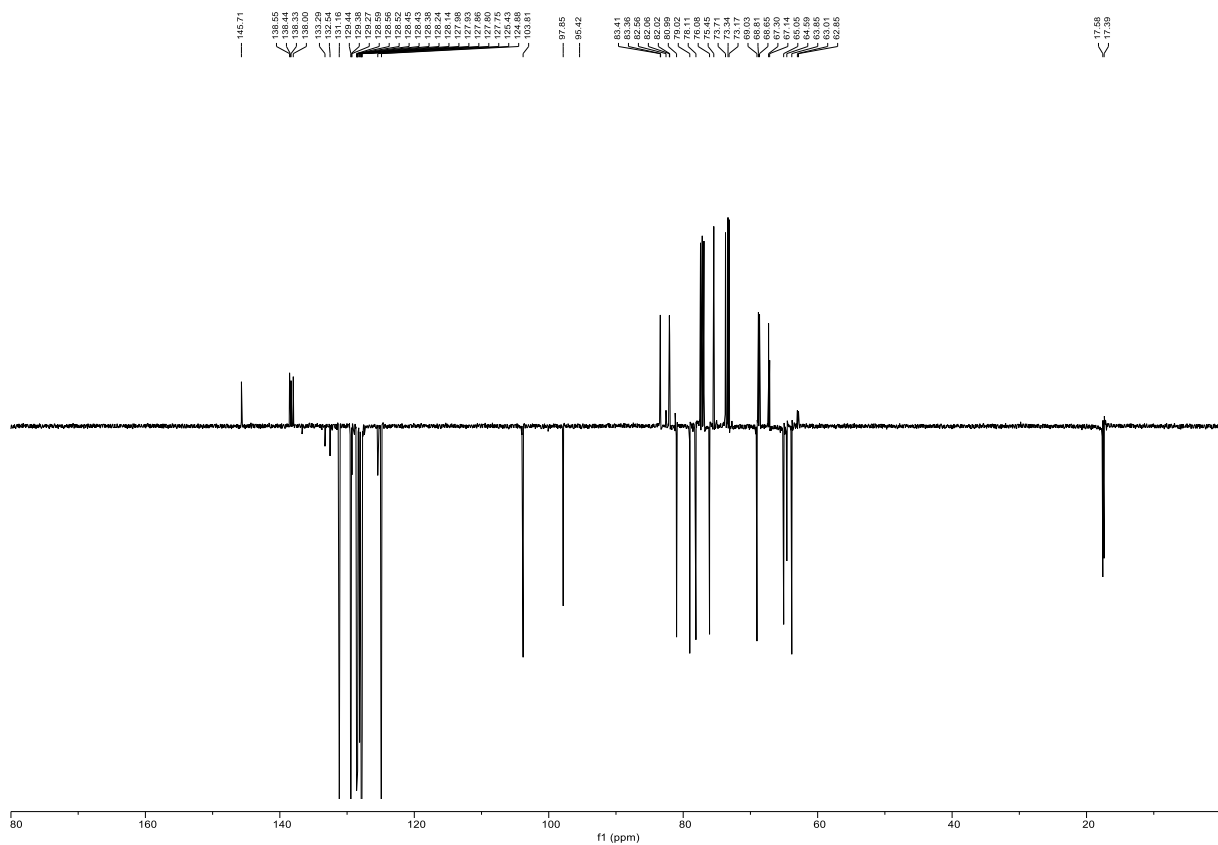

<sup>1</sup>H NMR, 400 MHz, CDCl<sub>3</sub> of S77

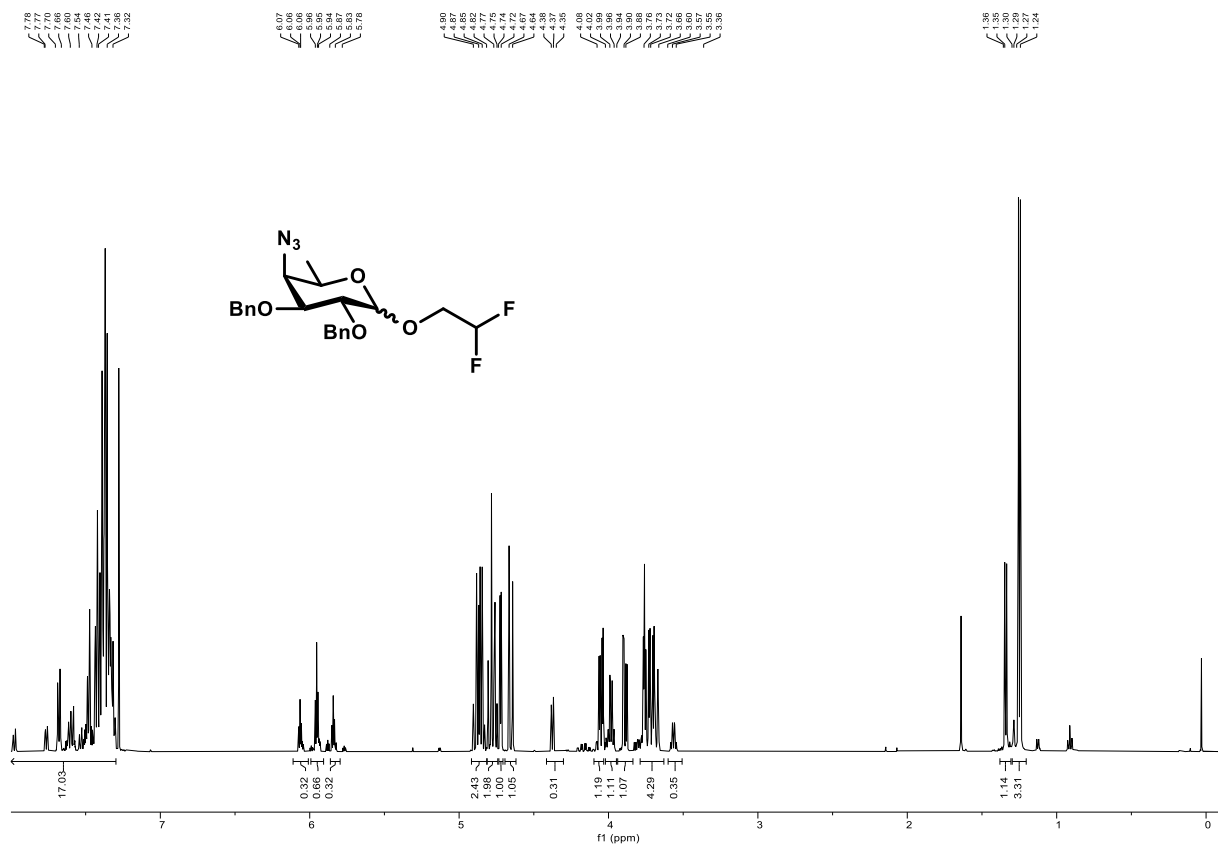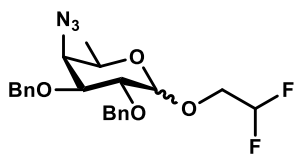





$^{13}\text{C}$  NMR, 101 MHz,  $\text{CDCl}_3$  of **S78**

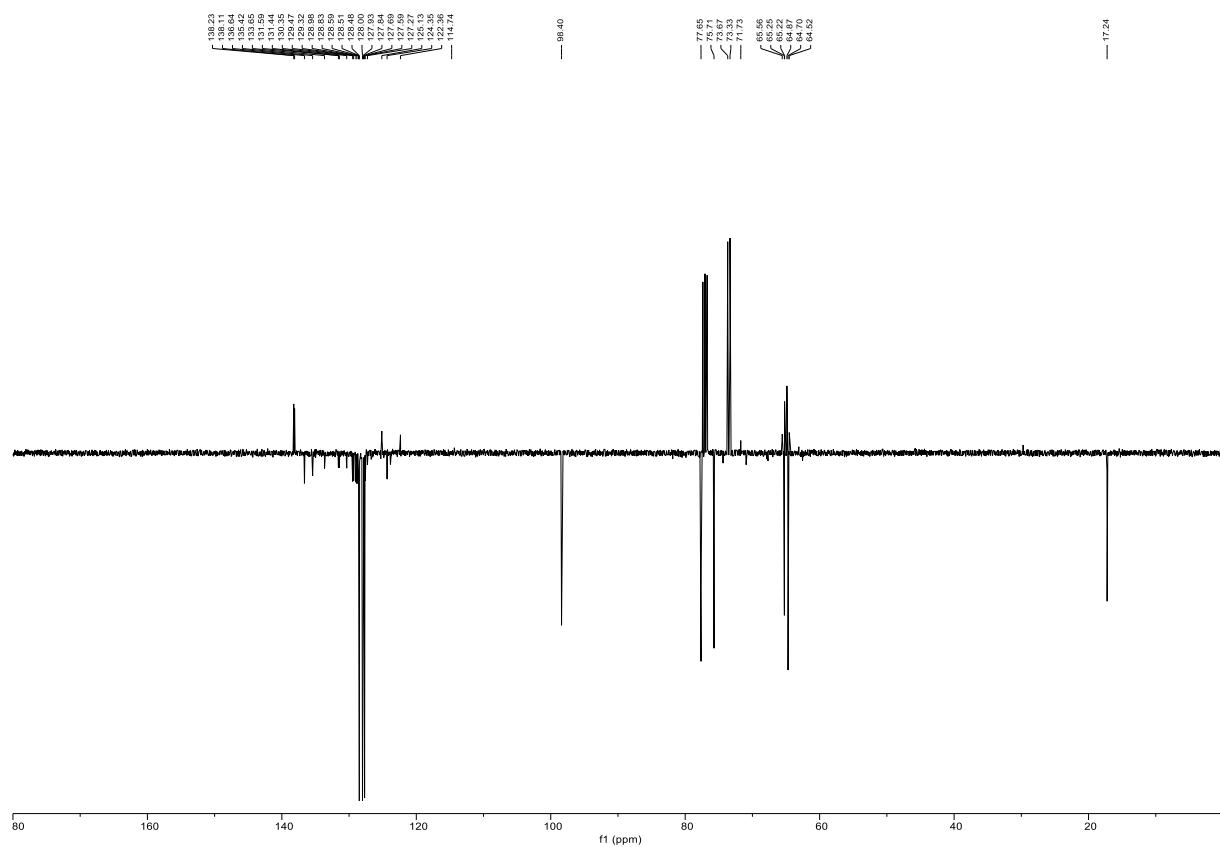

$^1\text{H}$  NMR, 400 MHz,  $\text{CDCl}_3$  of **S80**

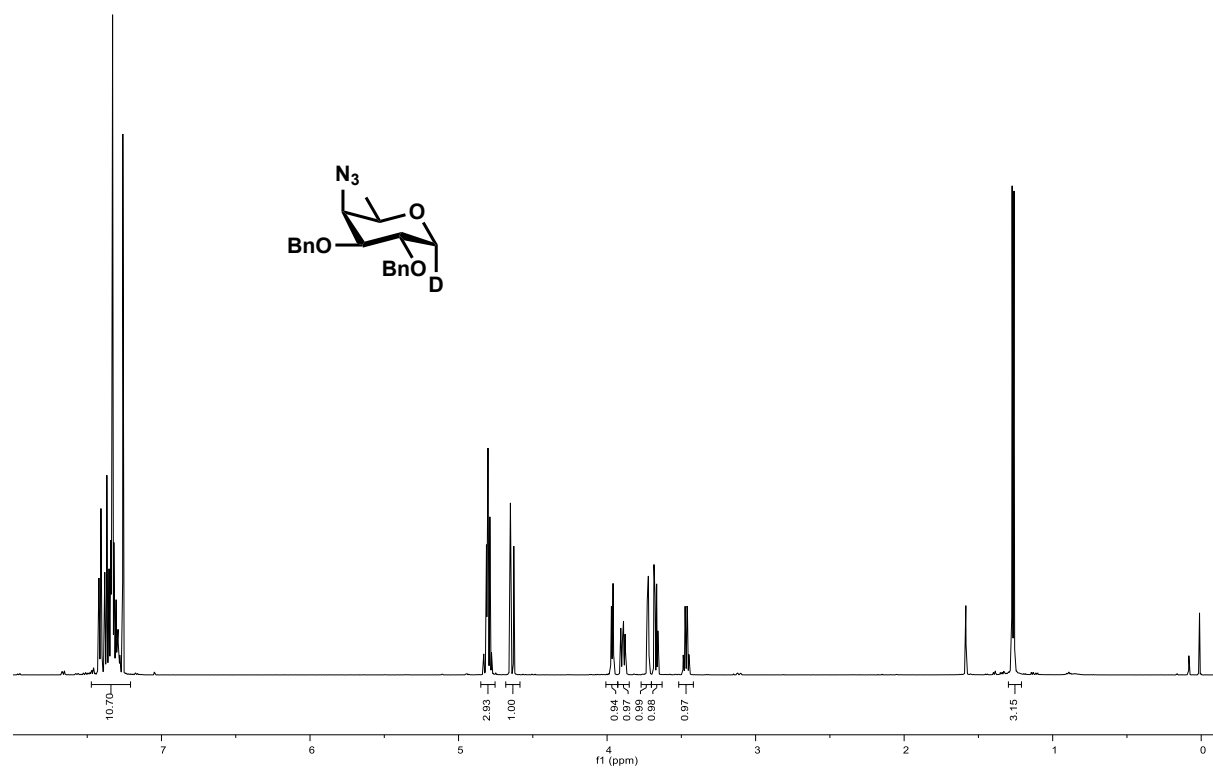

$^{13}\text{C}$  NMR, 101 MHz,  $\text{CDCl}_3$  of **S80**

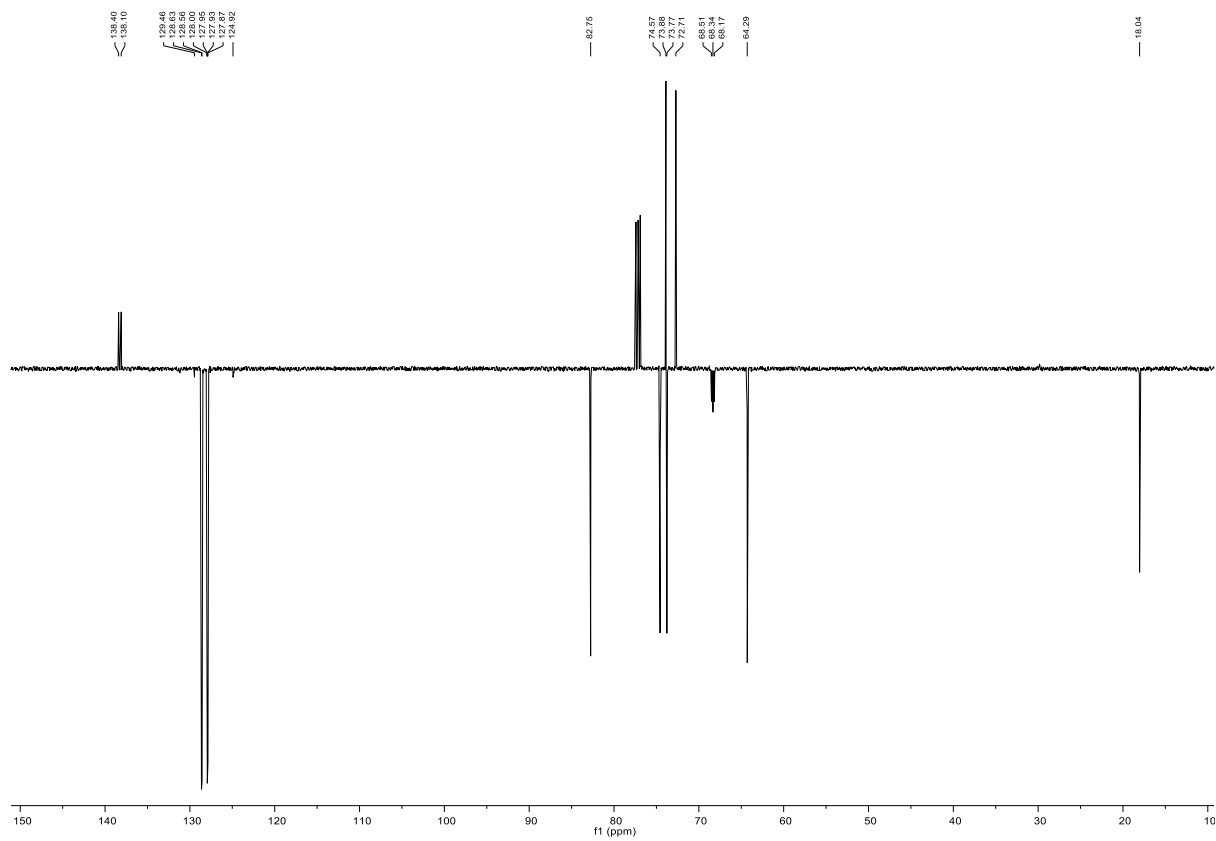

HH-COSY NMR,  $\text{CDCl}_3$  of **S80**

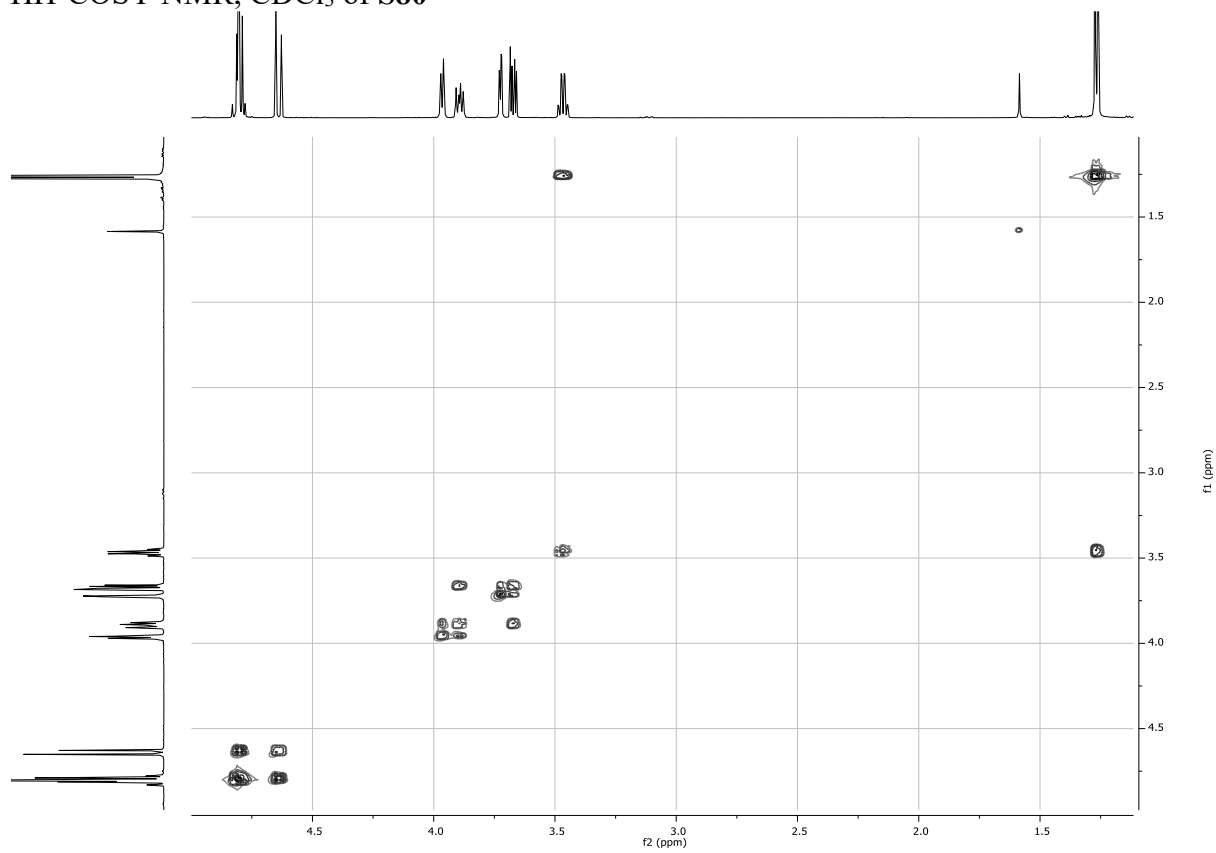

HSQC NMR, CDCl<sub>3</sub> of **S80**

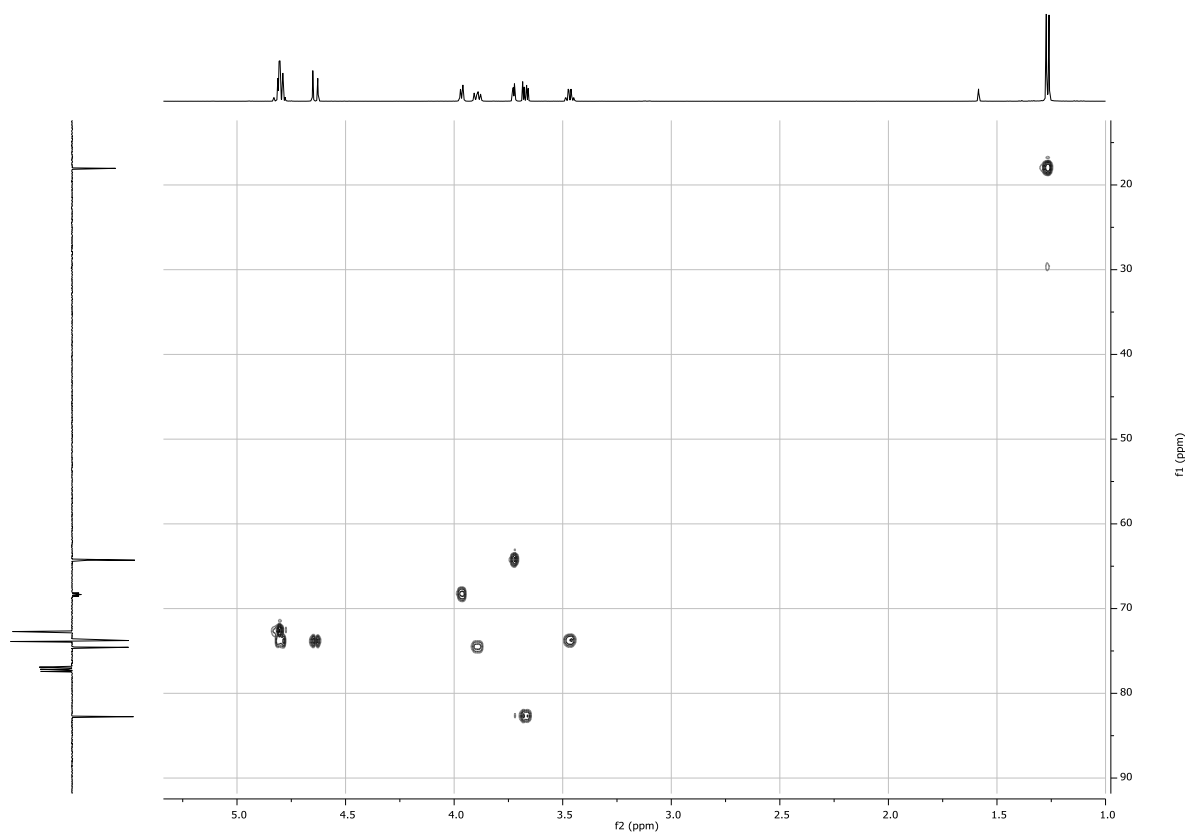

<sup>2</sup>H NMR, CDCl<sub>3</sub> of **S80**

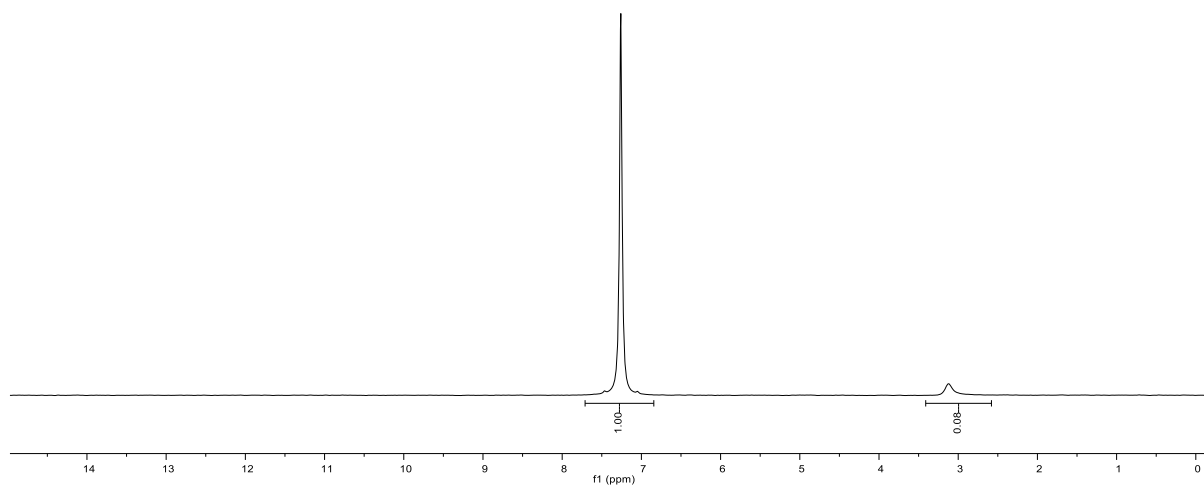

<sup>1</sup>H NMR, 400 MHz, CDCl<sub>3</sub> of **S79**

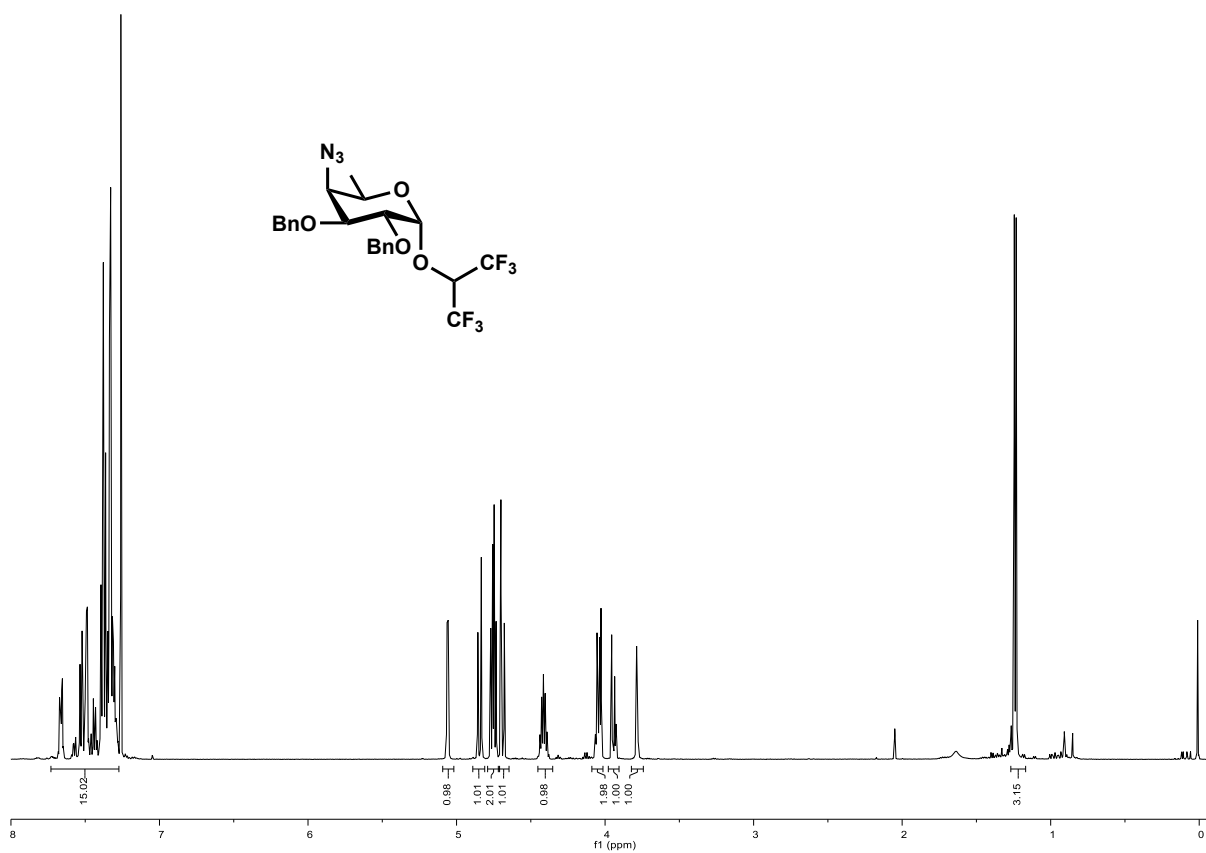

<sup>13</sup>C NMR, 101 MHz, CDCl<sub>3</sub> of **S79**

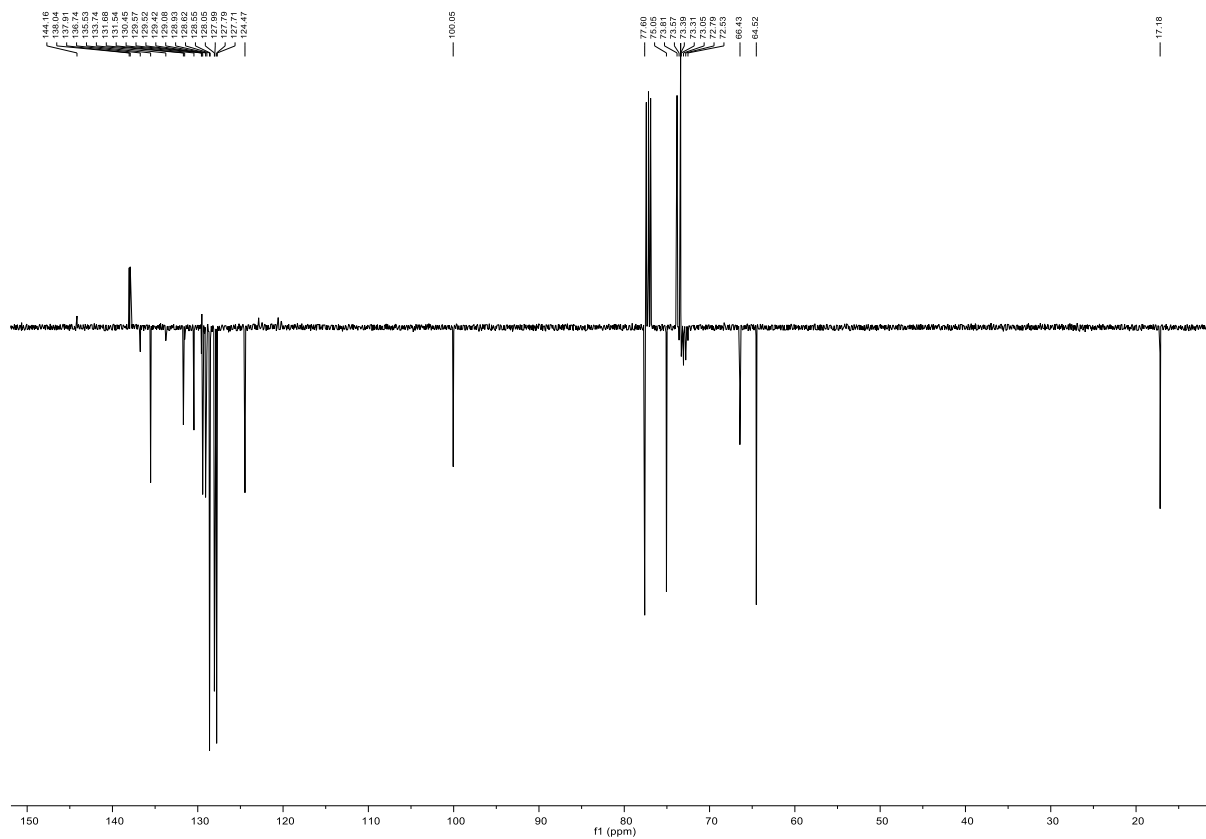

### HH-COSY NMR, CDCl<sub>3</sub> of S79

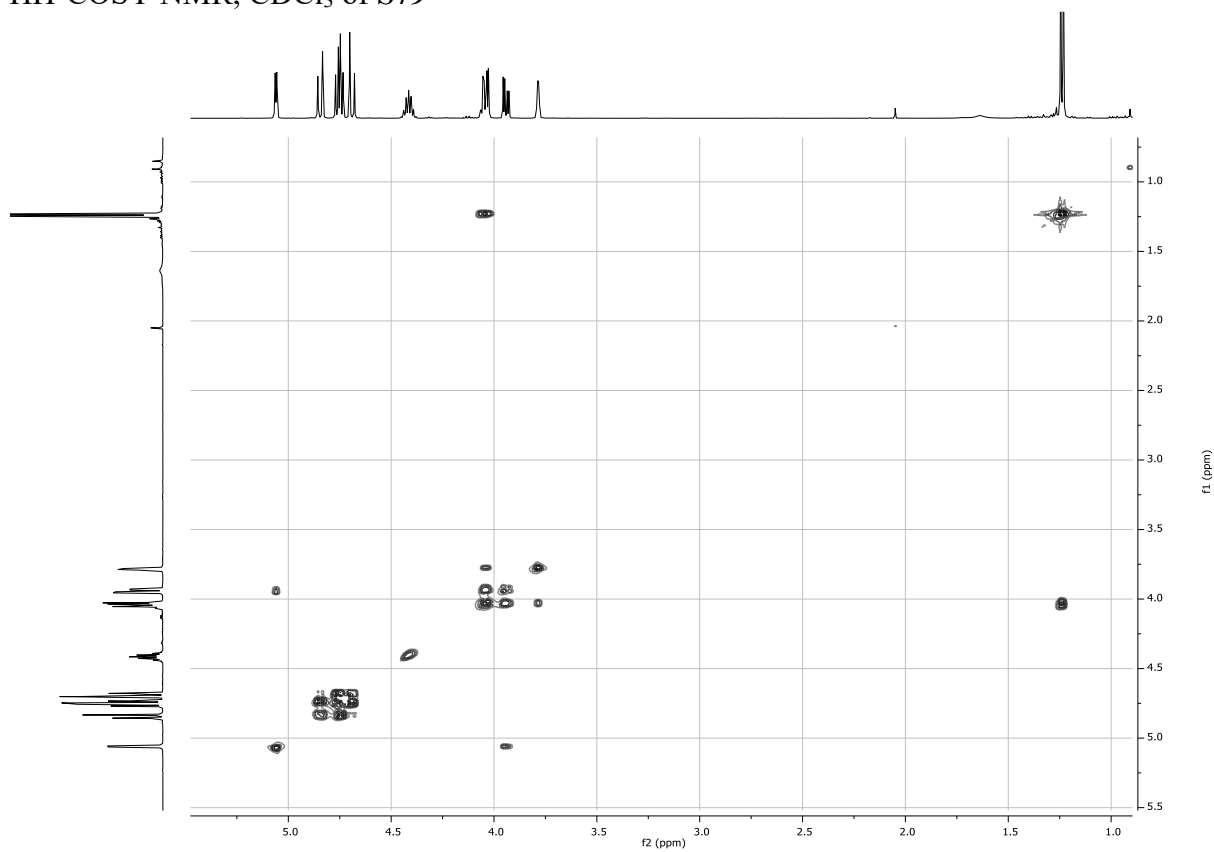

### HSQC NMR, CDCl<sub>3</sub> of S79

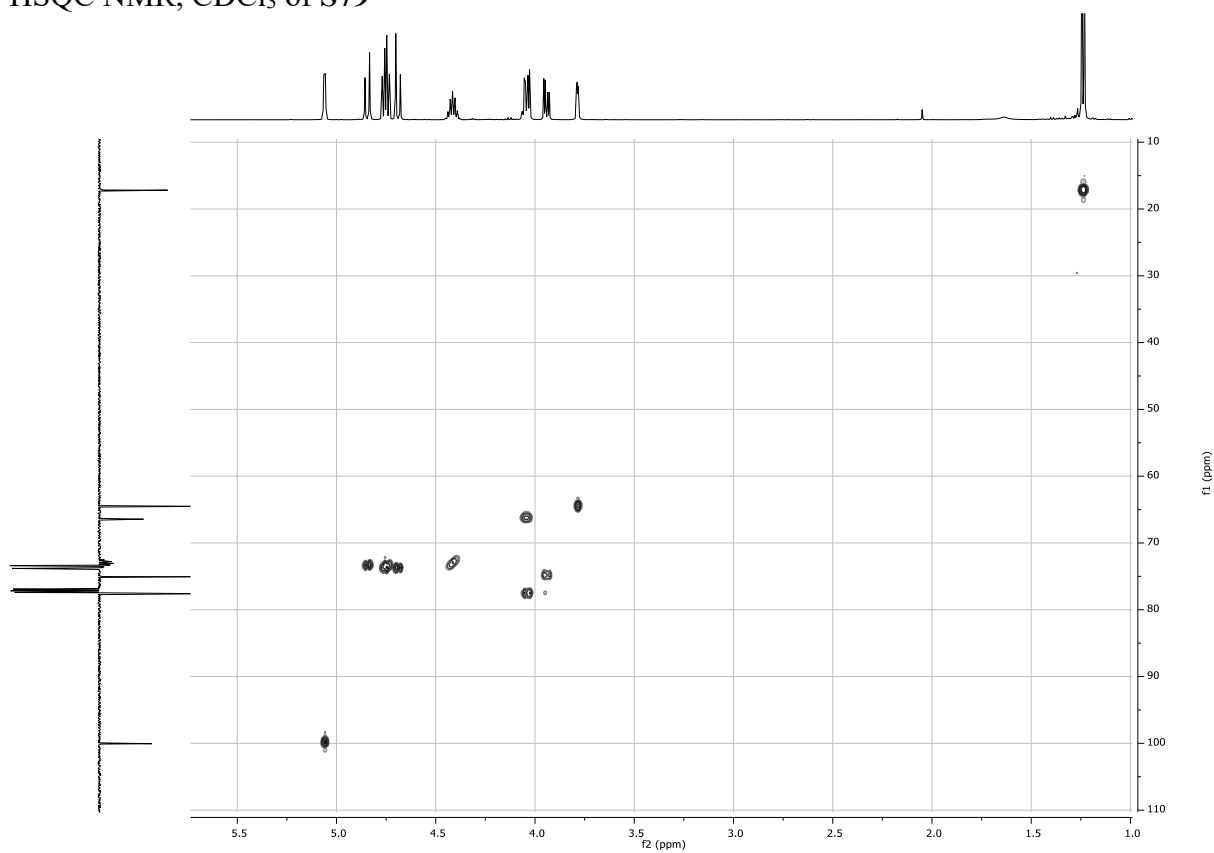

<sup>1</sup>H NMR, 850 MHz, CDCl<sub>3</sub> of **S74**

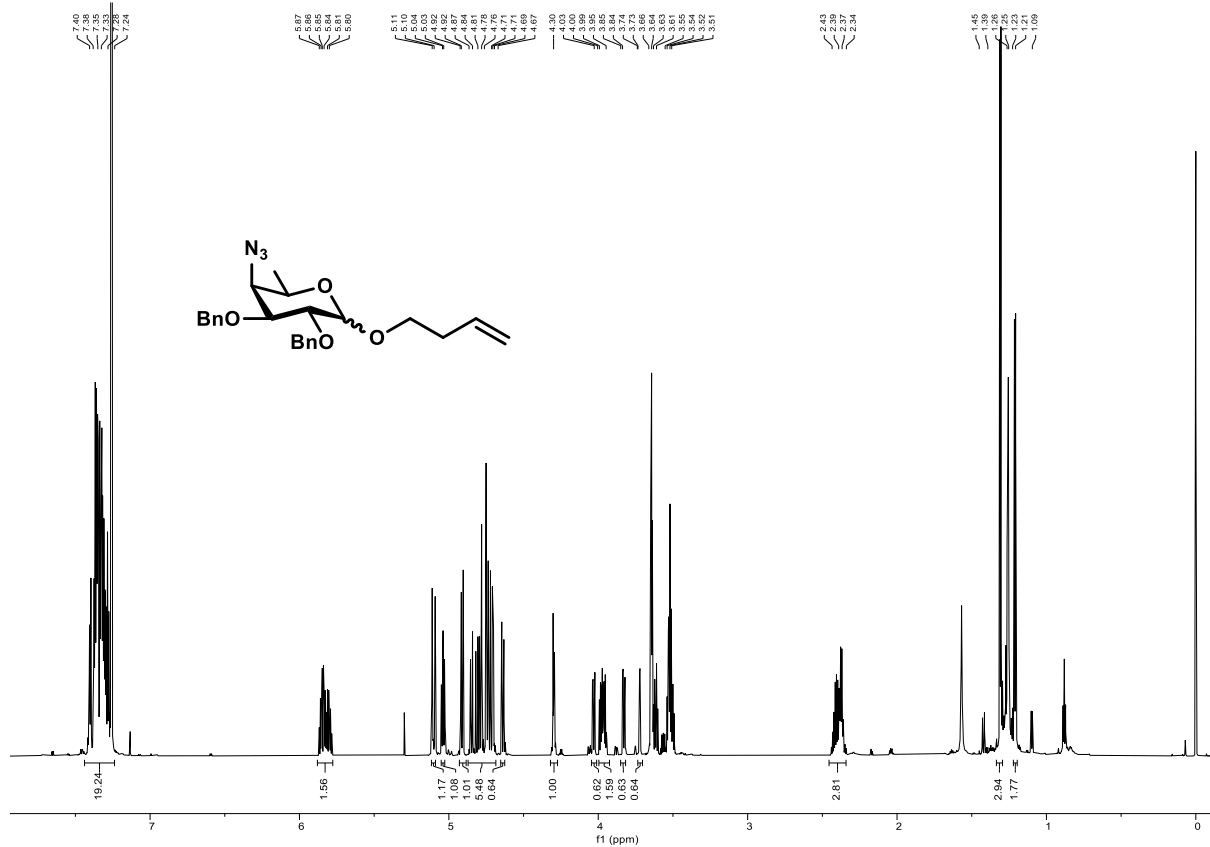

<sup>13</sup>C NMR, 214 MHz, CDCl<sub>3</sub> of **S74**

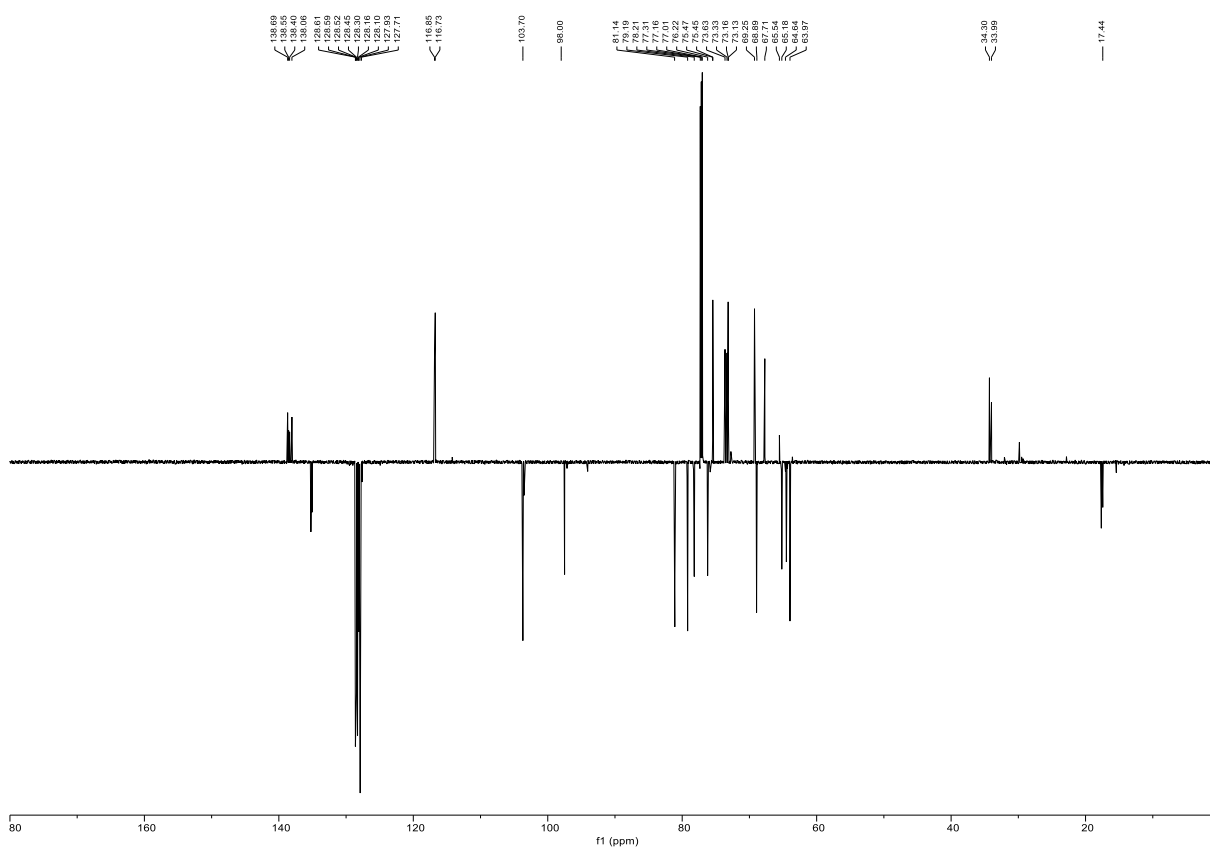

<sup>1</sup>H NMR, 500 MHz, CDCl<sub>3</sub> of **S81**

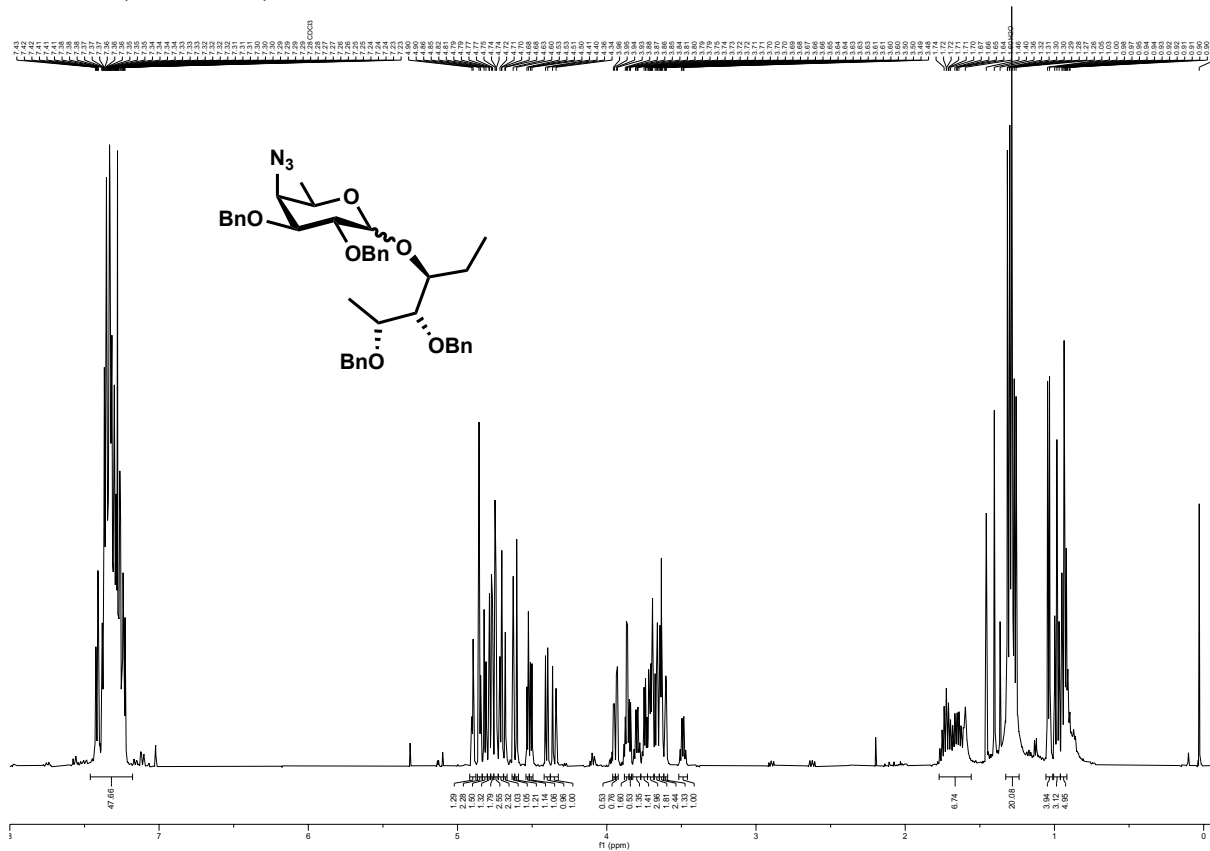

<sup>13</sup>C NMR, 126 MHz, CDCl<sub>3</sub> of **S81**

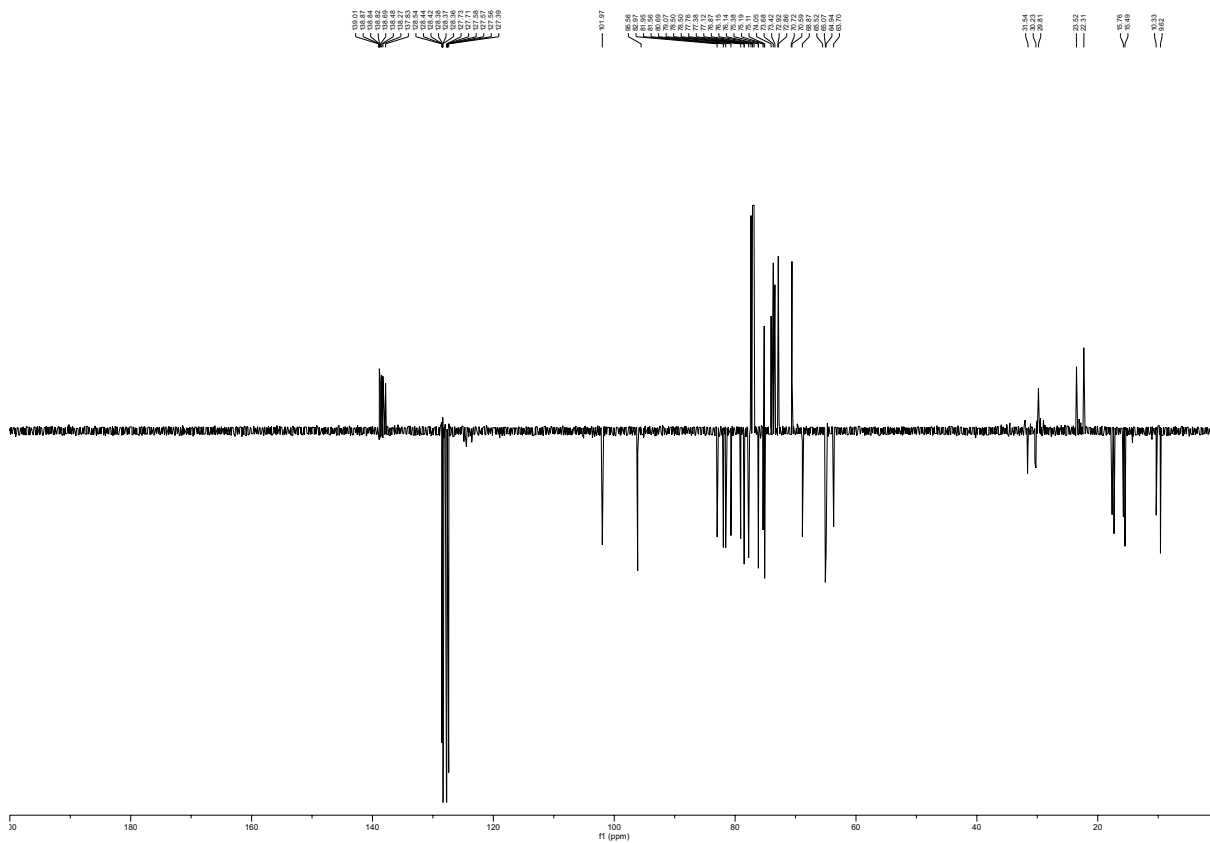

HH-COSY NMR, CDCl<sub>3</sub> of S81

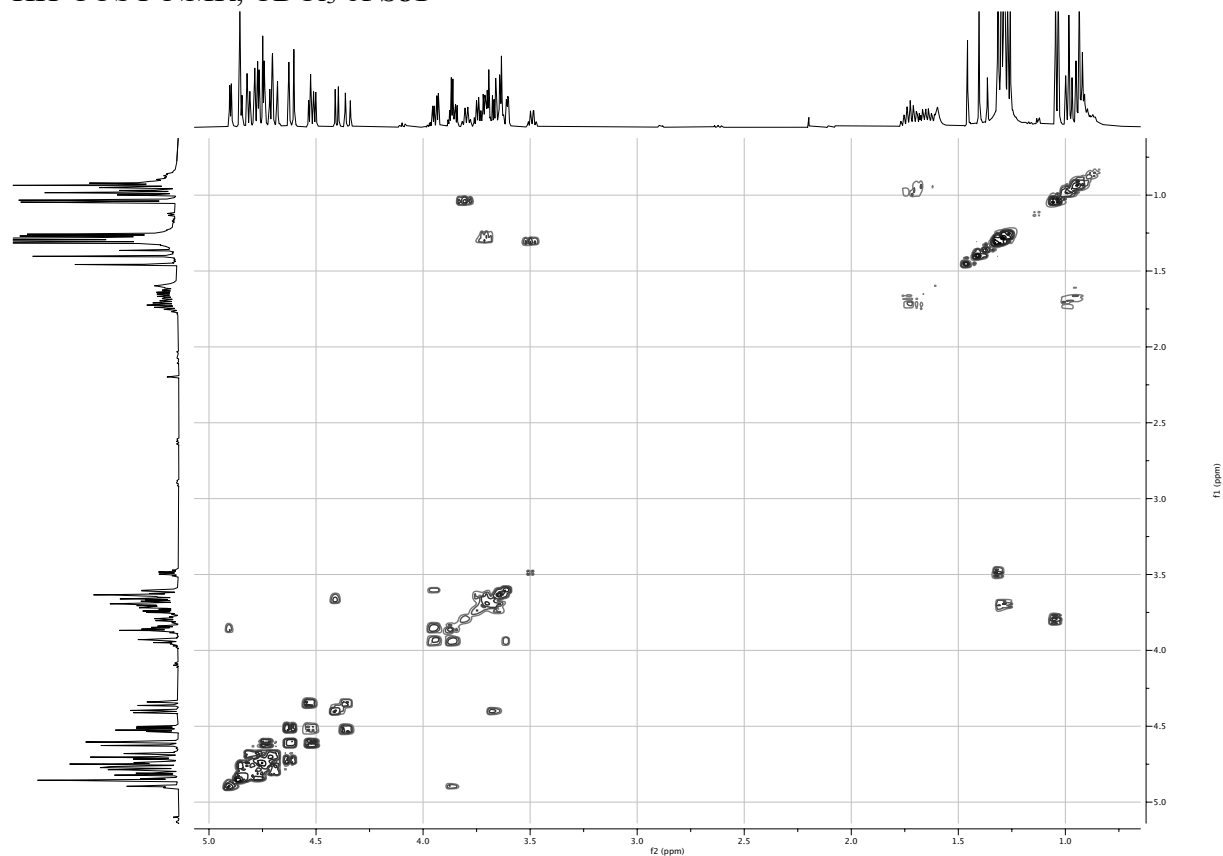

HSQC NMR, CDCl<sub>3</sub> of S81

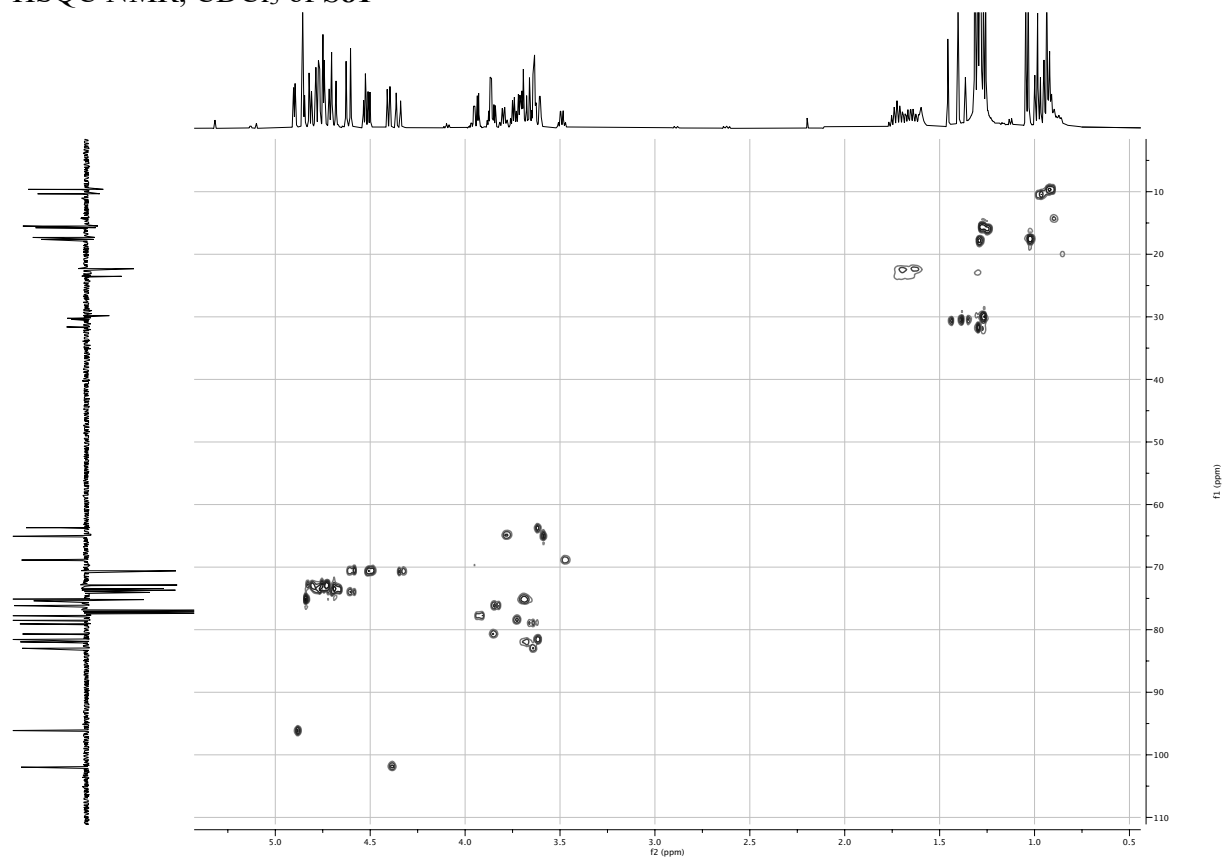



<sup>1</sup>H NMR, 500 MHz, CDCl<sub>3</sub> of S82

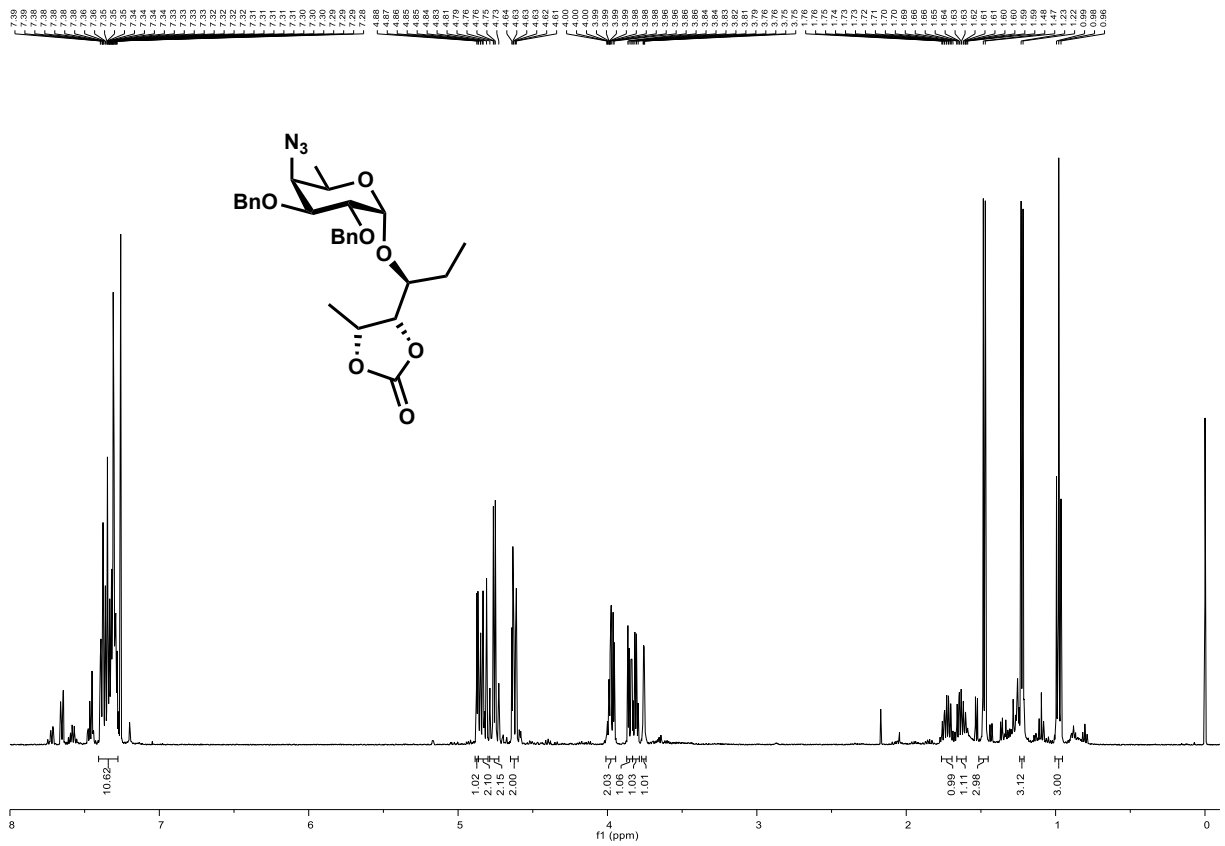

<sup>13</sup>C NMR, 126 MHz, CDCl<sub>3</sub> of S82

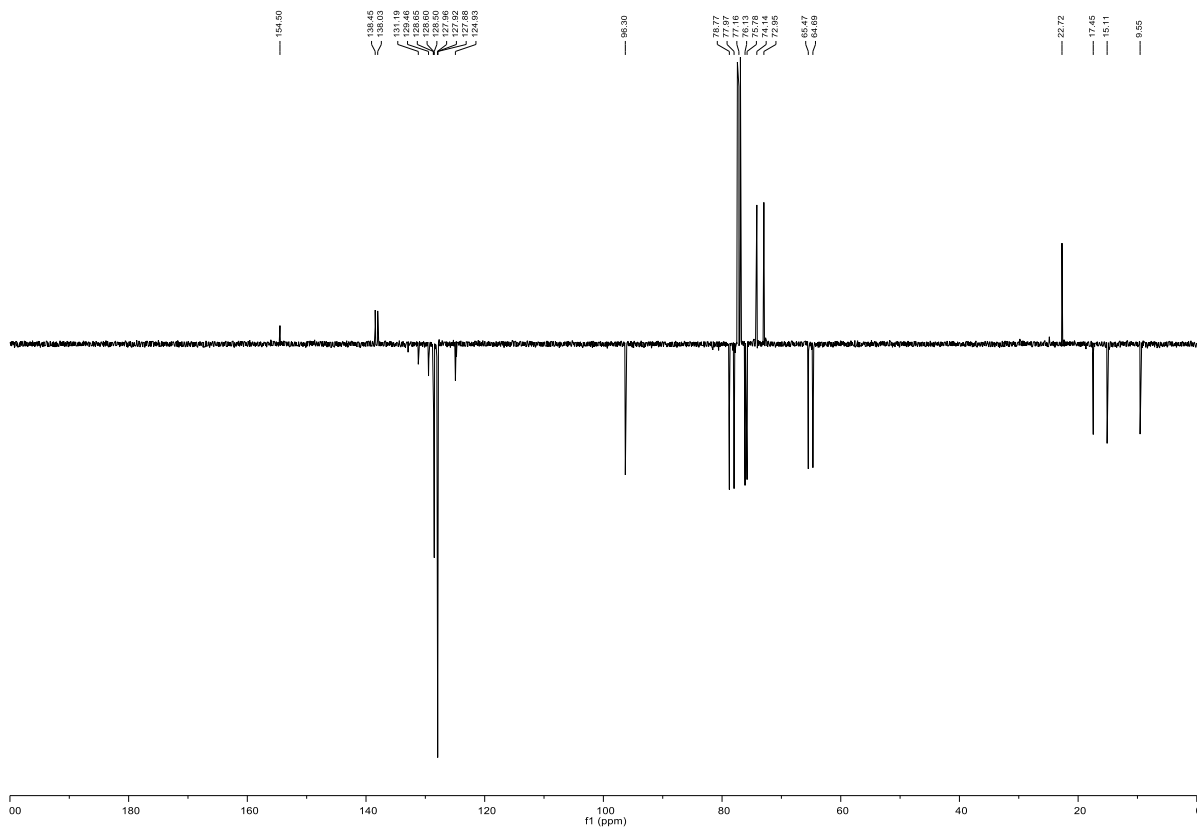

HH-COSY NMR, CDCl<sub>3</sub> of S82

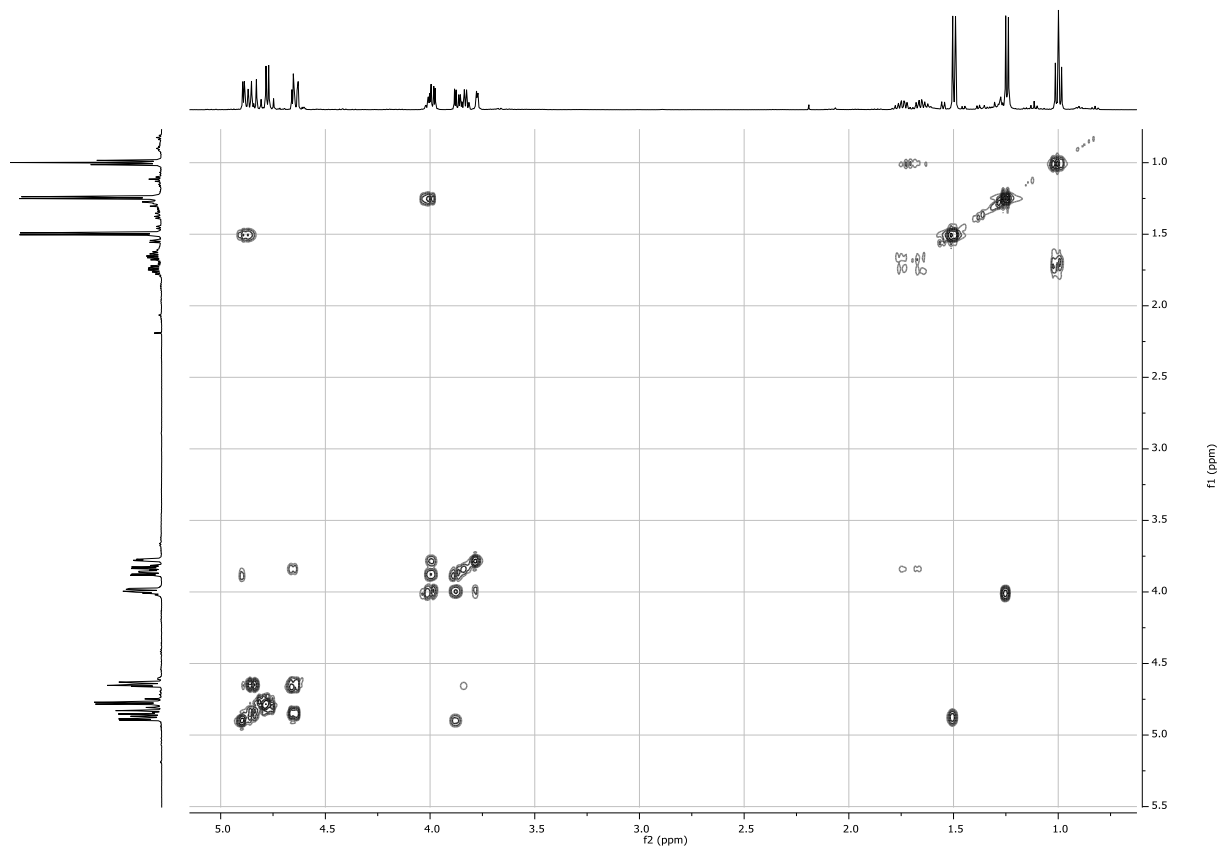

HSQC NMR, CDCl<sub>3</sub> of S82

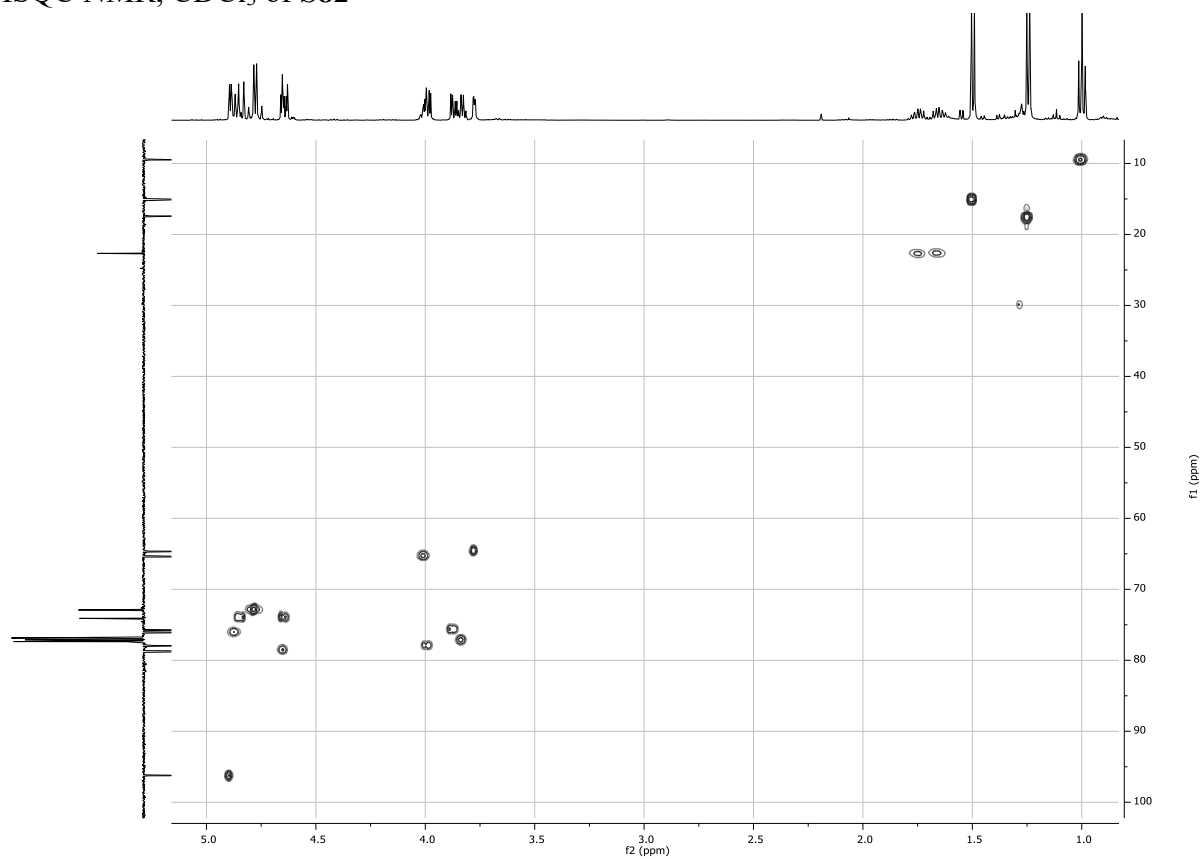

HMBC NMR, CDCl<sub>3</sub> of **S82**

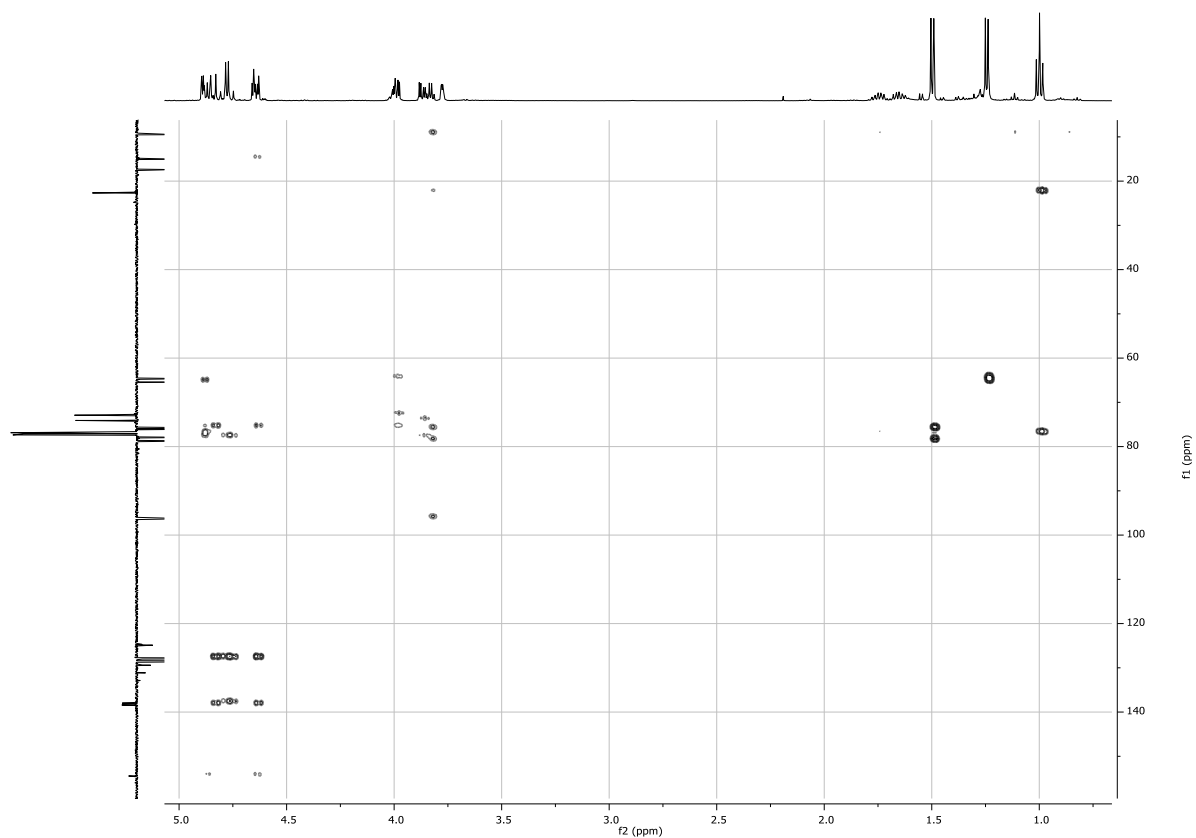

<sup>1</sup>H NMR, 400 MHz, CDCl<sub>3</sub> of **S75 (+DMF)**

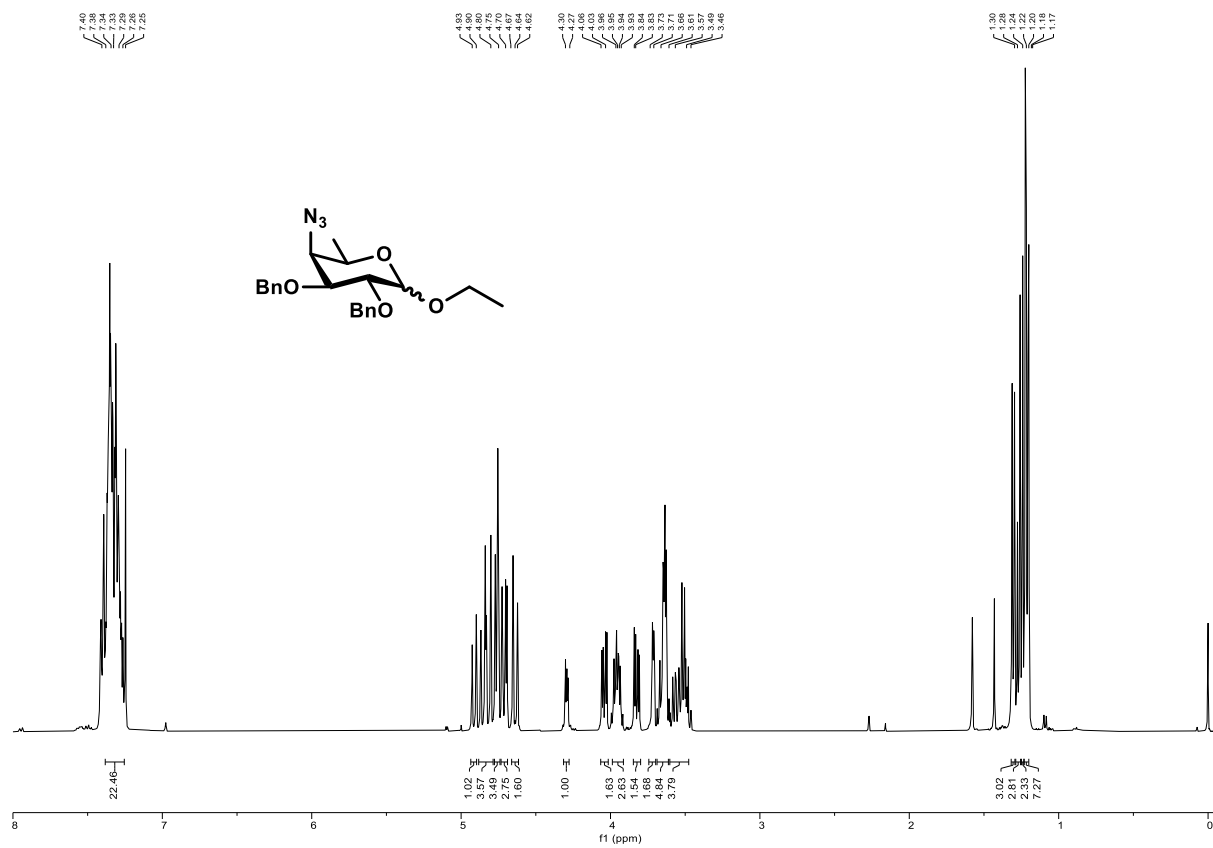

<sup>13</sup>C NMR, 101 MHz, CDCl<sub>3</sub> of **S75** (+DMF)

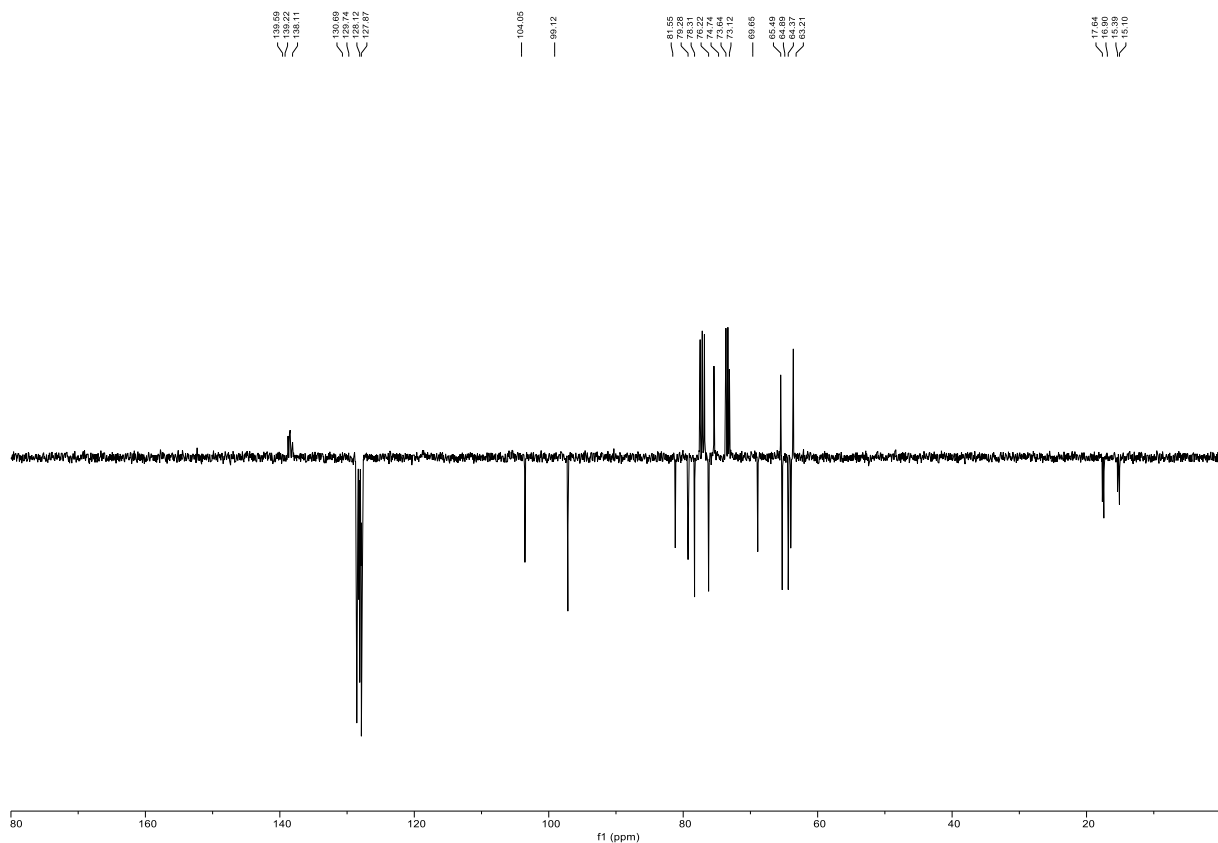

<sup>1</sup>H NMR, 400 MHz, CDCl<sub>3</sub> of **S76** (+DMF)

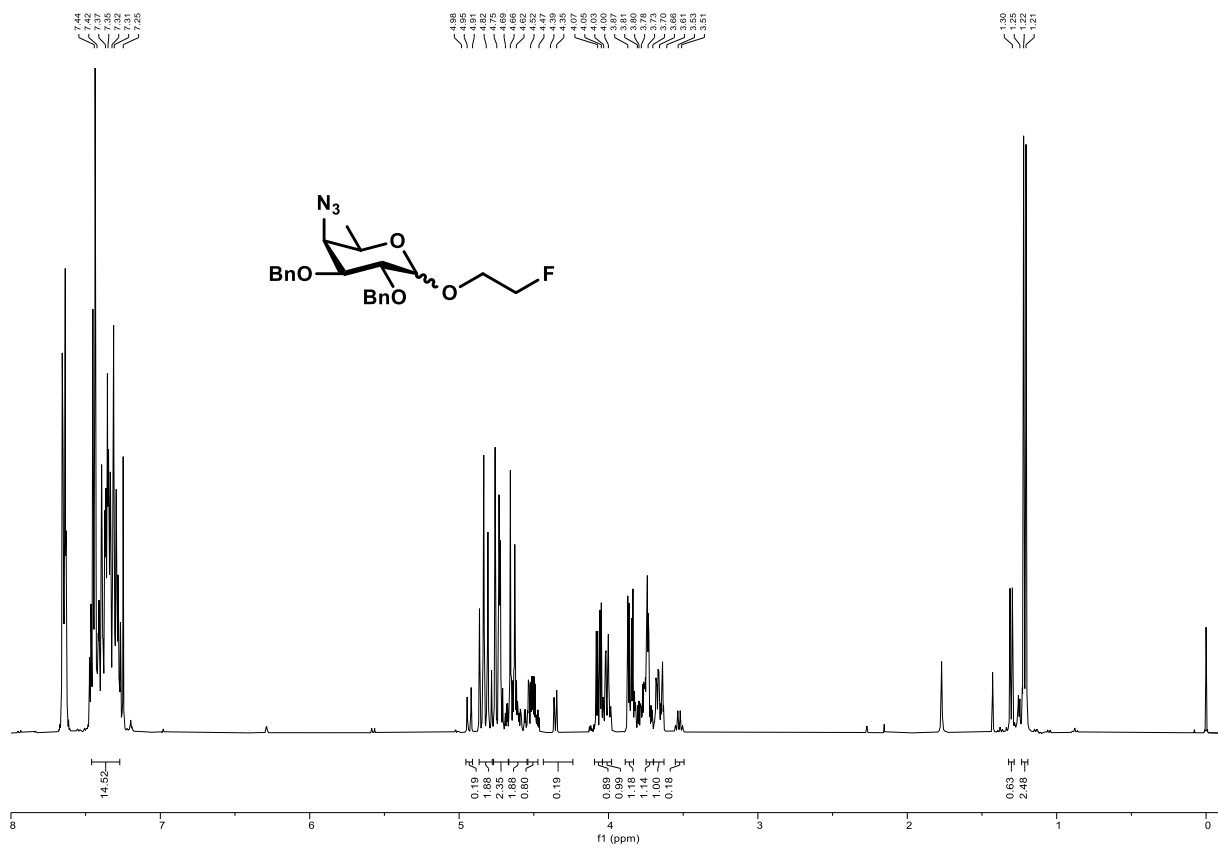

<sup>13</sup>C NMR, 101 MHz, CDCl<sub>3</sub> of S76 (+DMF)

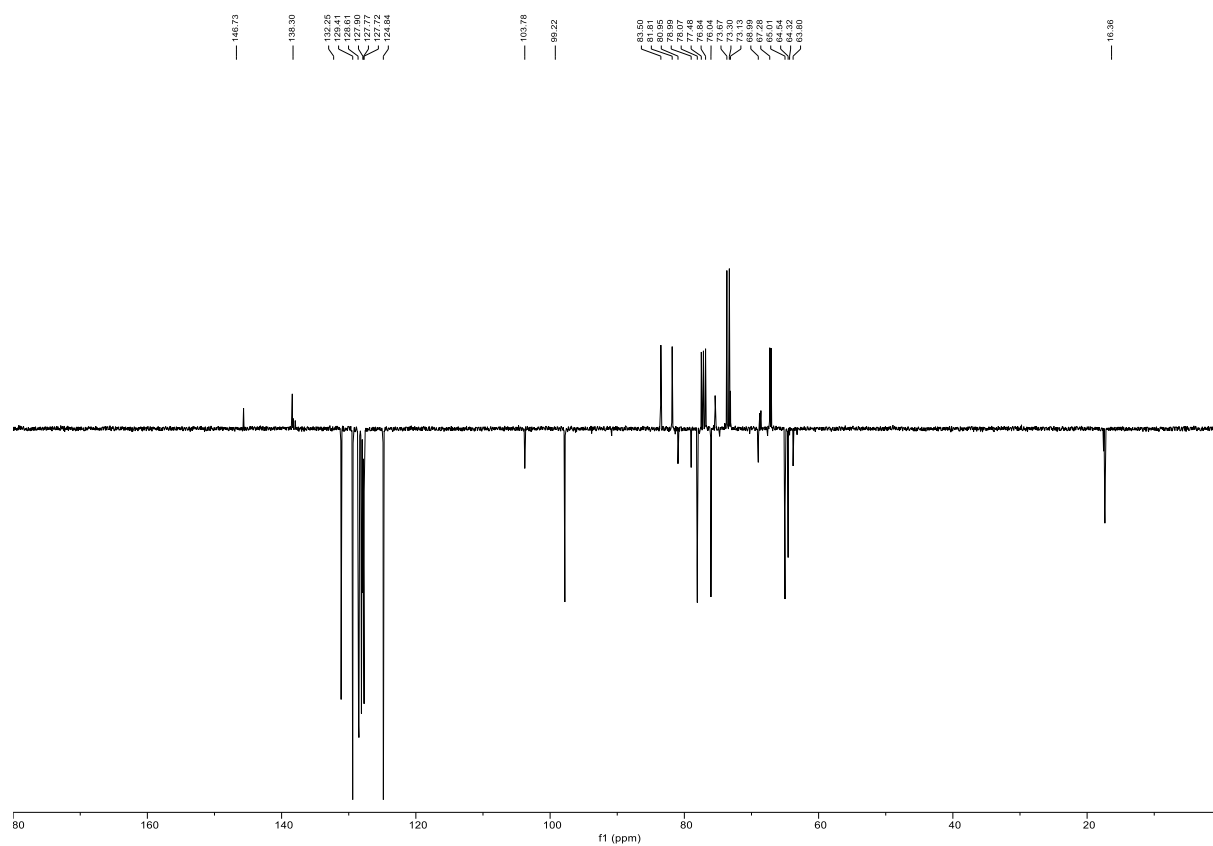

<sup>1</sup>H NMR, 400 MHz, CDCl<sub>3</sub> of S77 (+DMF)

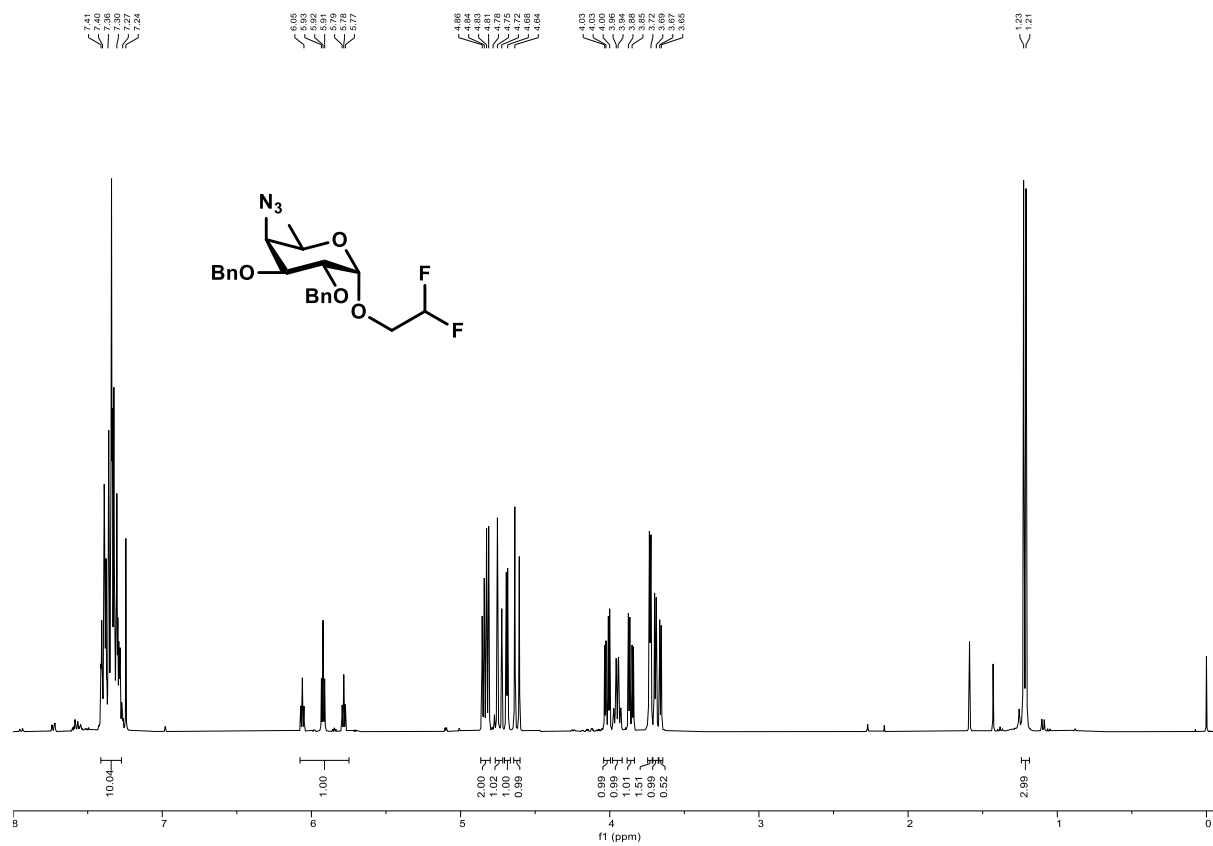

<sup>13</sup>C NMR, 101 MHz, CDCl<sub>3</sub> of **S77** (+DMF)

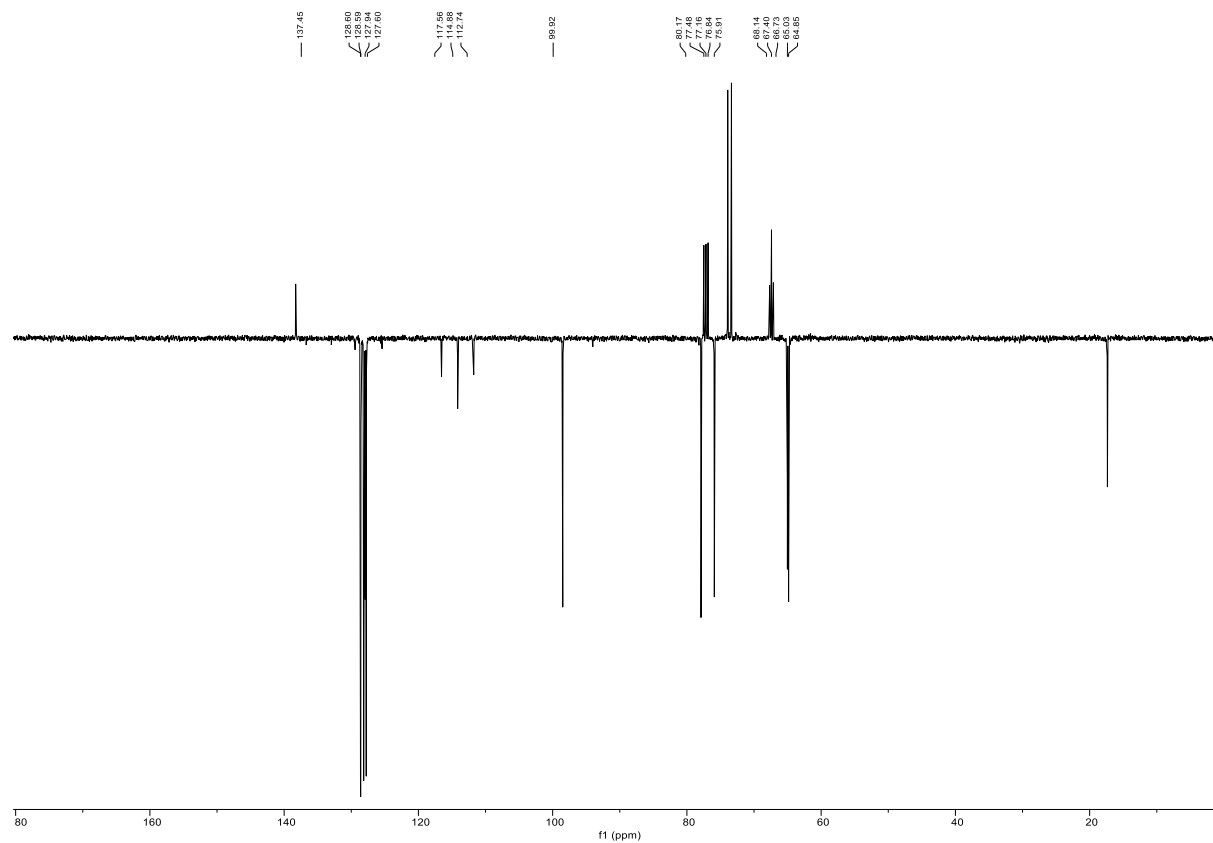

<sup>1</sup>H NMR, 400 MHz, CDCl<sub>3</sub> of **S78** (+DMF)

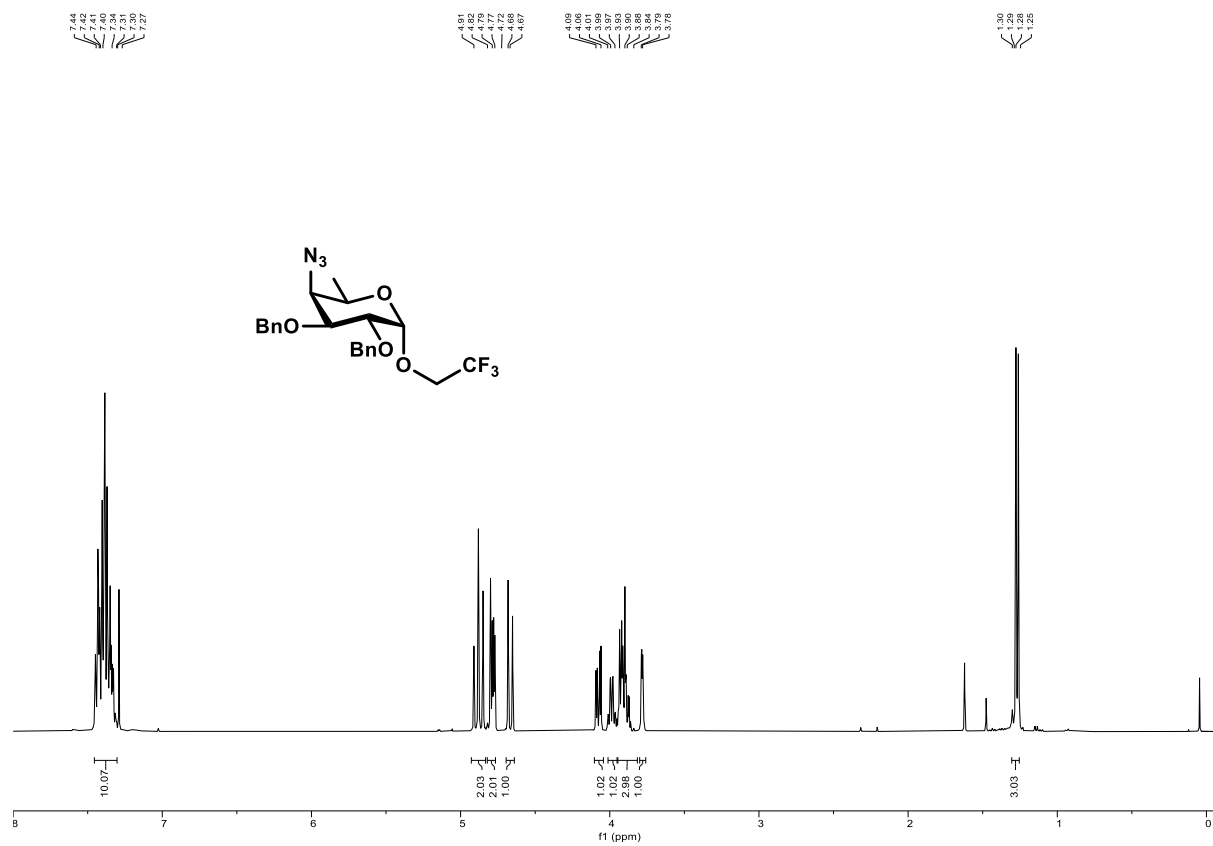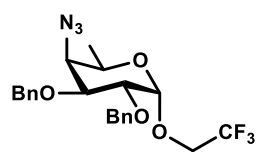

$^{13}\text{C}$  NMR, 101 MHz,  $\text{CDCl}_3$  of **S78** (+DMF)

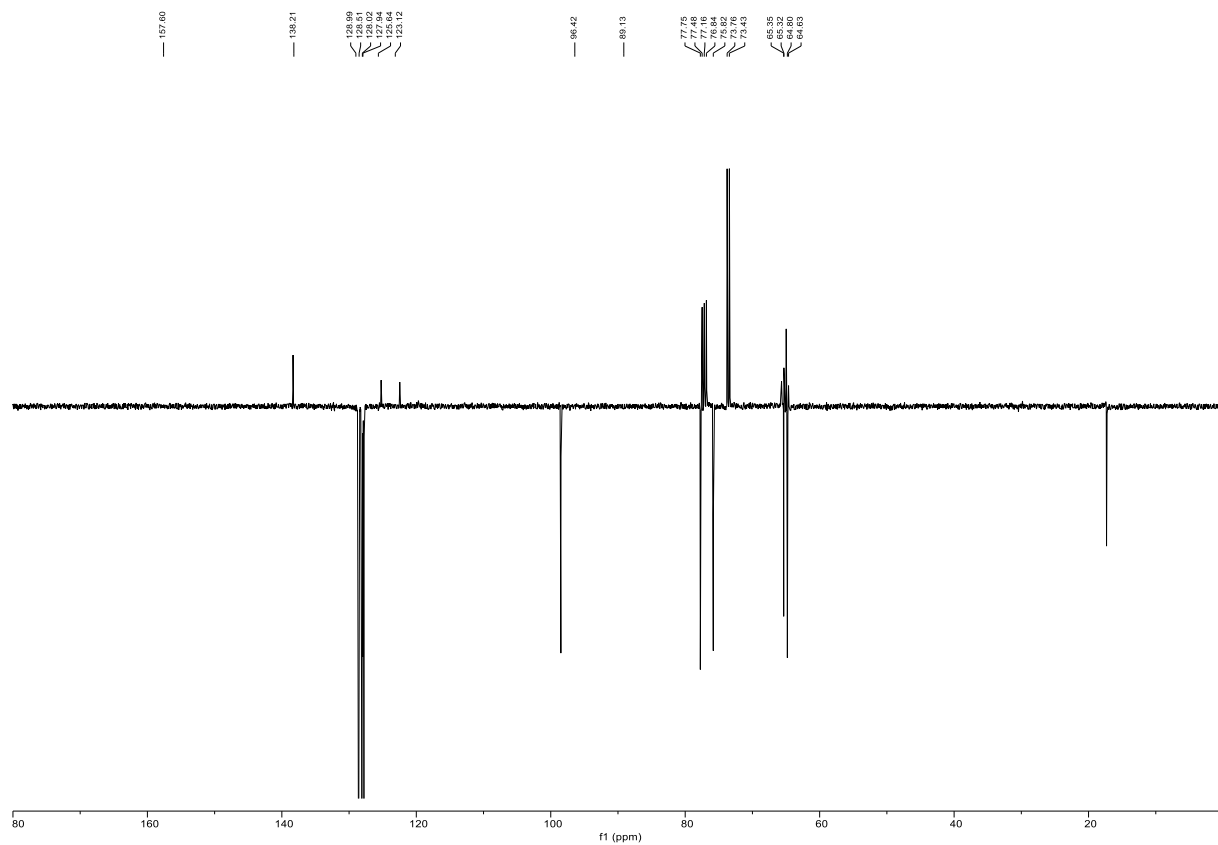

$^1\text{H}$  NMR, 500 MHz,  $\text{CDCl}_3$  of **S74** (+DMF)

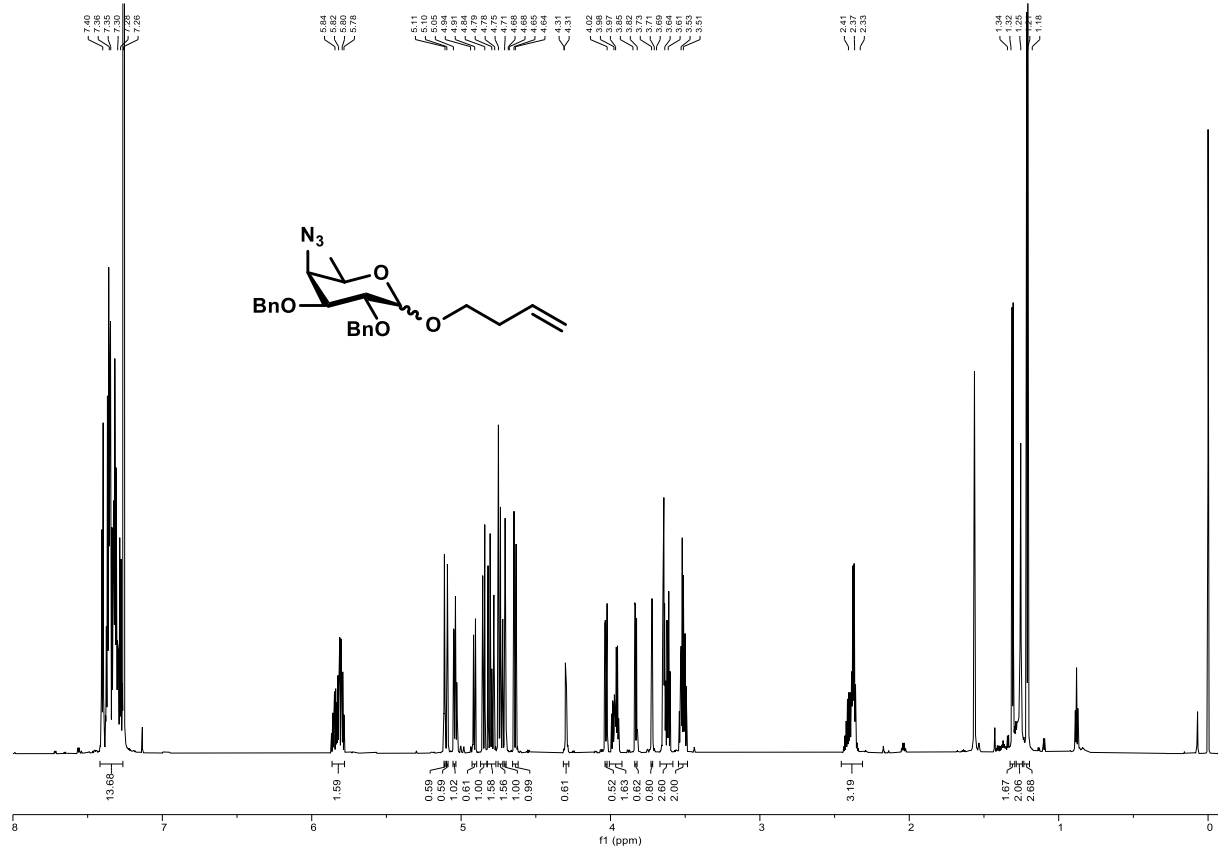

$^{13}\text{C}$  NMR, 126 MHz,  $\text{CDCl}_3$  of **S74** (+DMF)

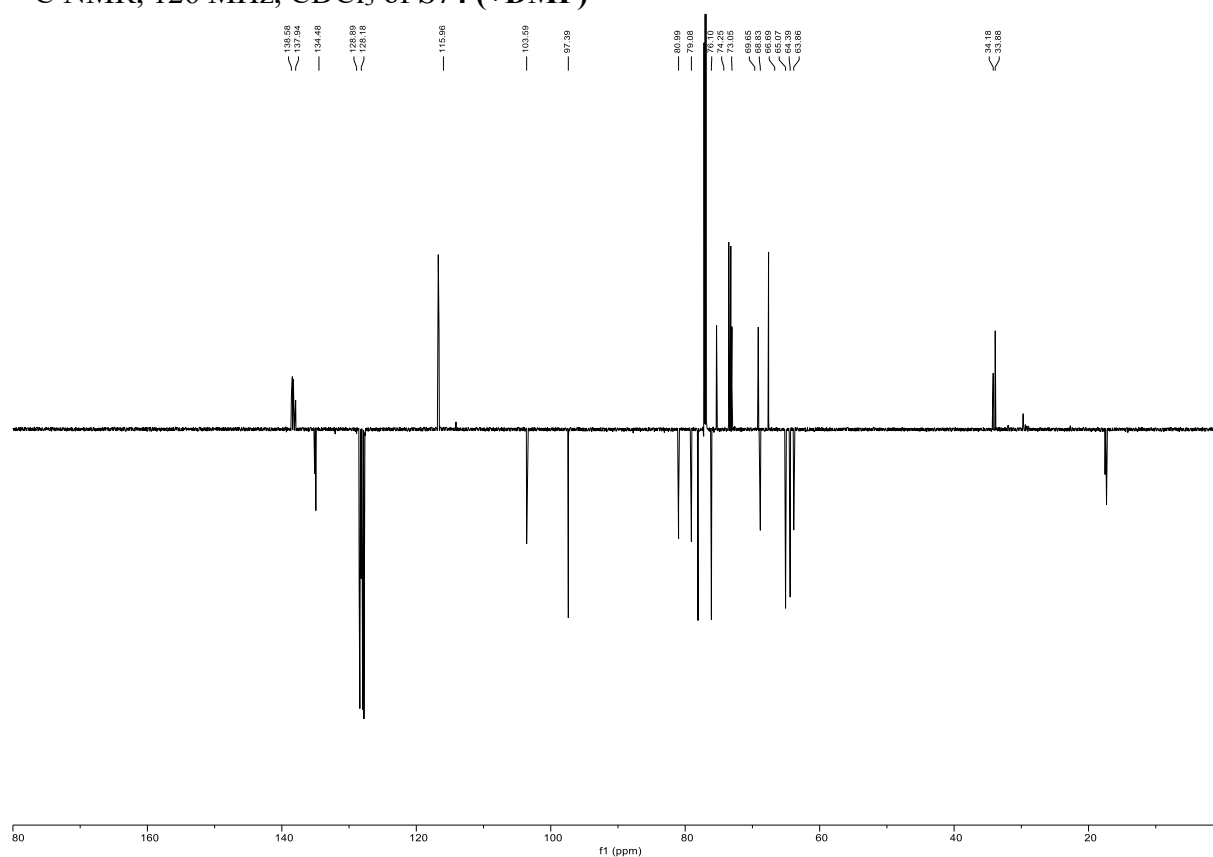

$^1\text{H}$  NMR, 850 MHz,  $\text{CDCl}_3$  of **S75** (+TBAI)

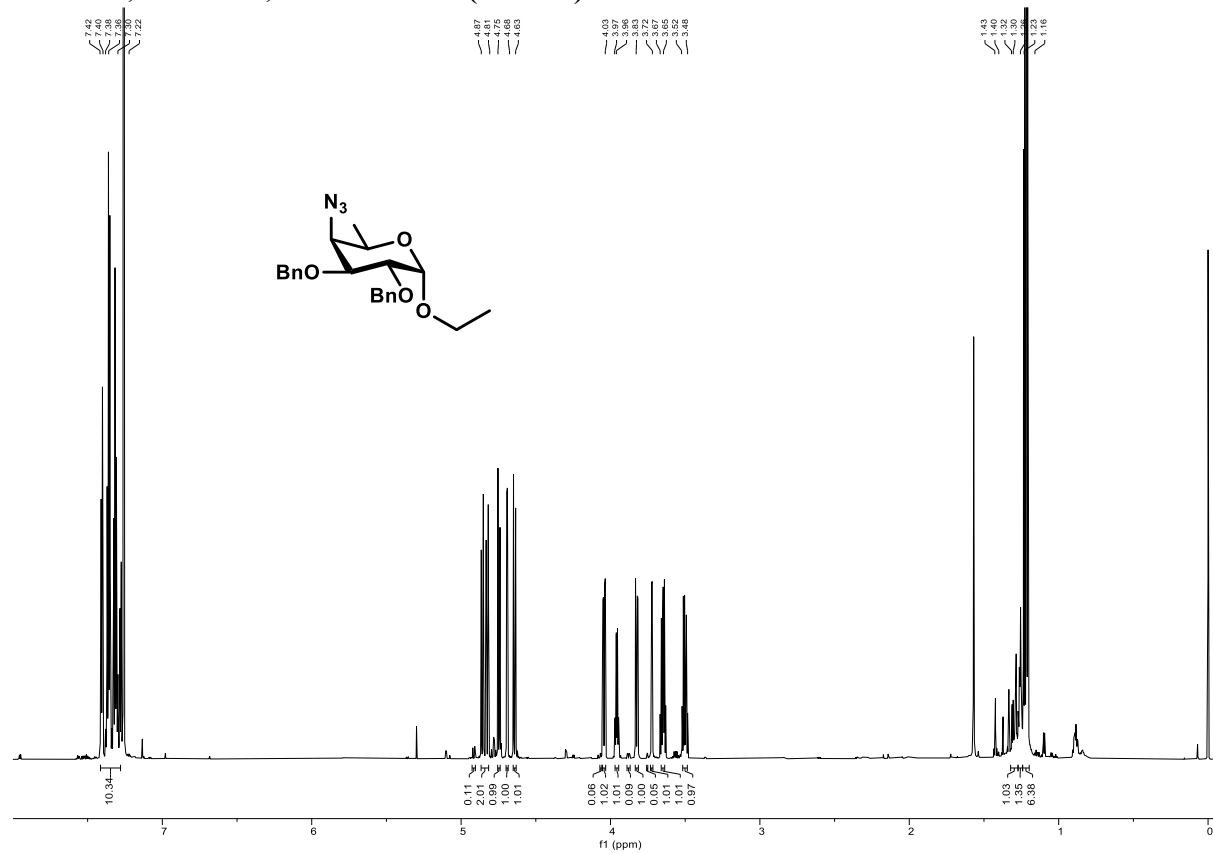



$^{13}\text{C}$  NMR, 214 MHz,  $\text{CDCl}_3$  of **S75** (+TBAI)

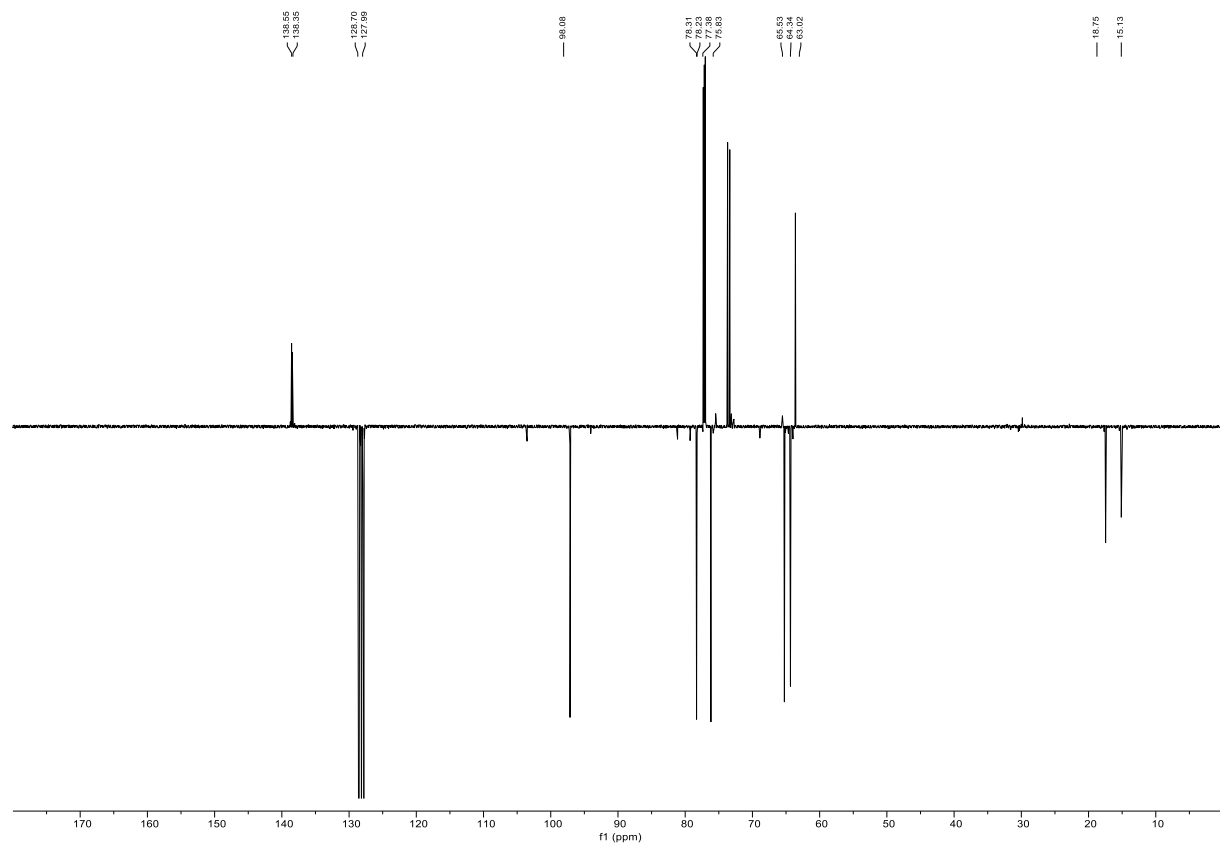

$^1\text{H}$  NMR, 500 MHz,  $\text{CDCl}_3$  of **S76** (+TBAI)

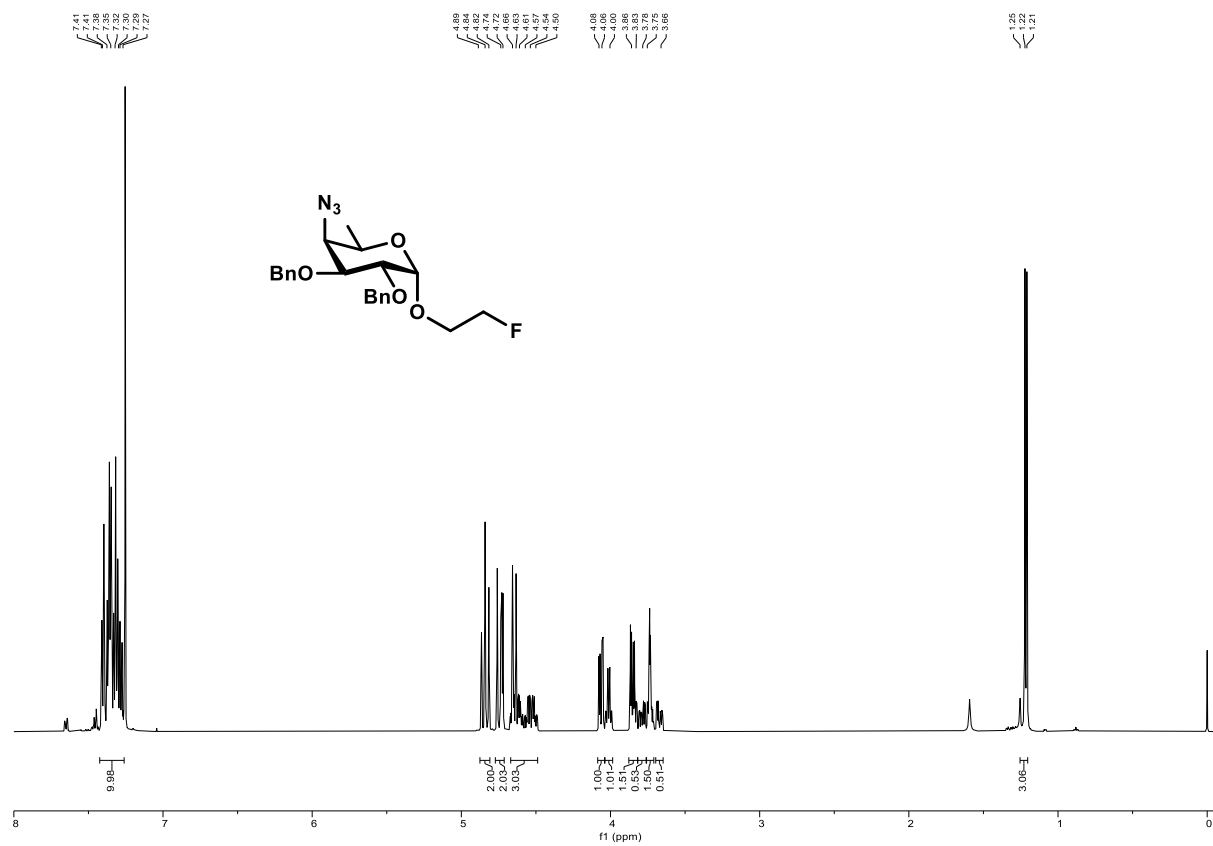

$^{13}\text{C}$  NMR, 126 MHz,  $\text{CDCl}_3$  of **S76** (+TBAI)

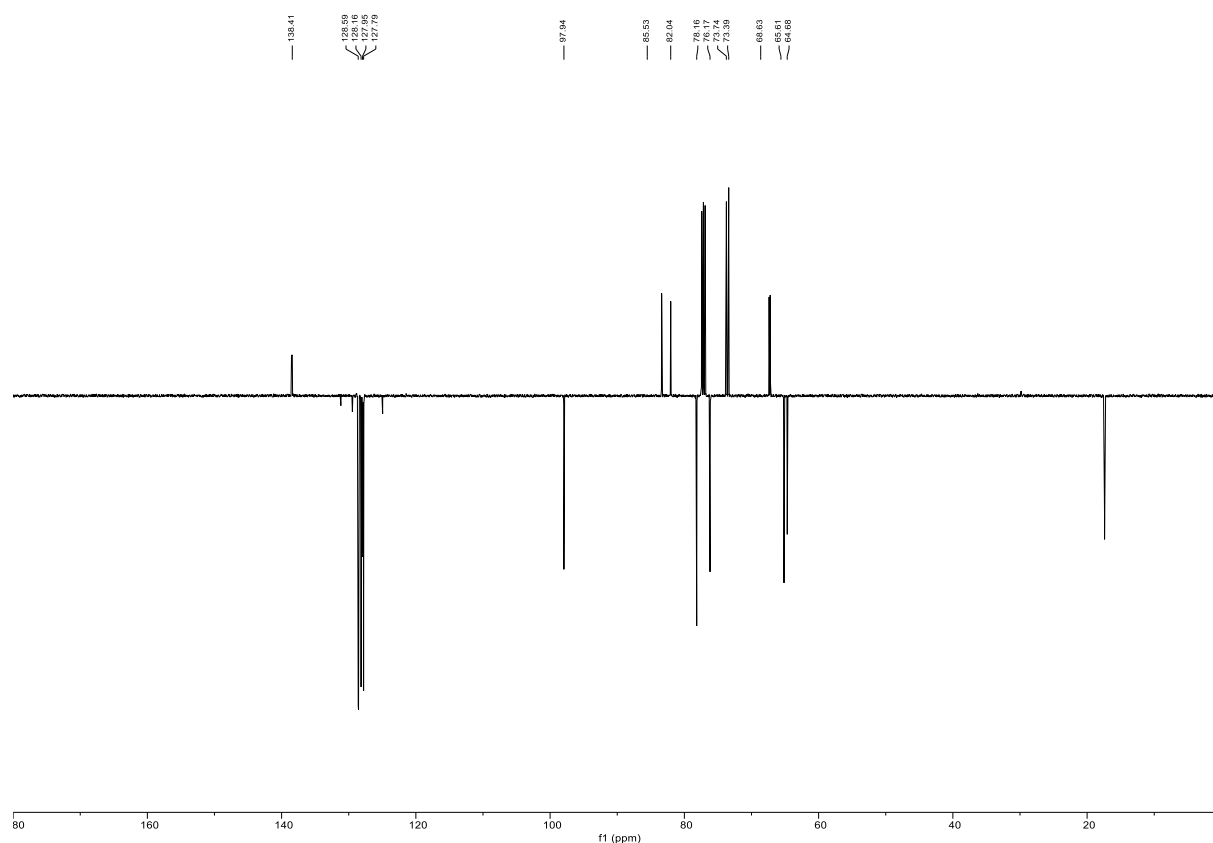

$^1\text{H}$  NMR, 500 MHz,  $\text{CDCl}_3$  of **S77** (+TBAI)

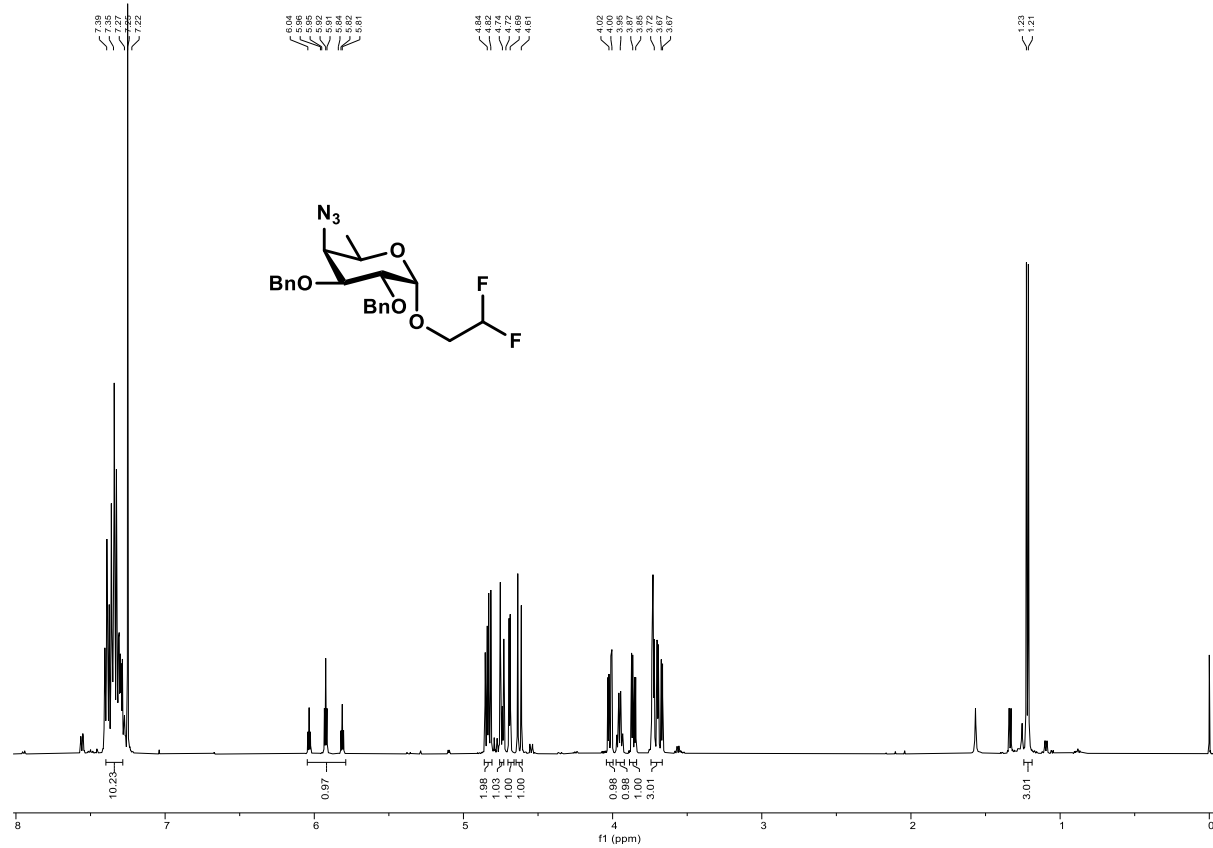

$^{13}\text{C}$  NMR, 126 MHz,  $\text{CDCl}_3$  of **S77** (+TBAI)

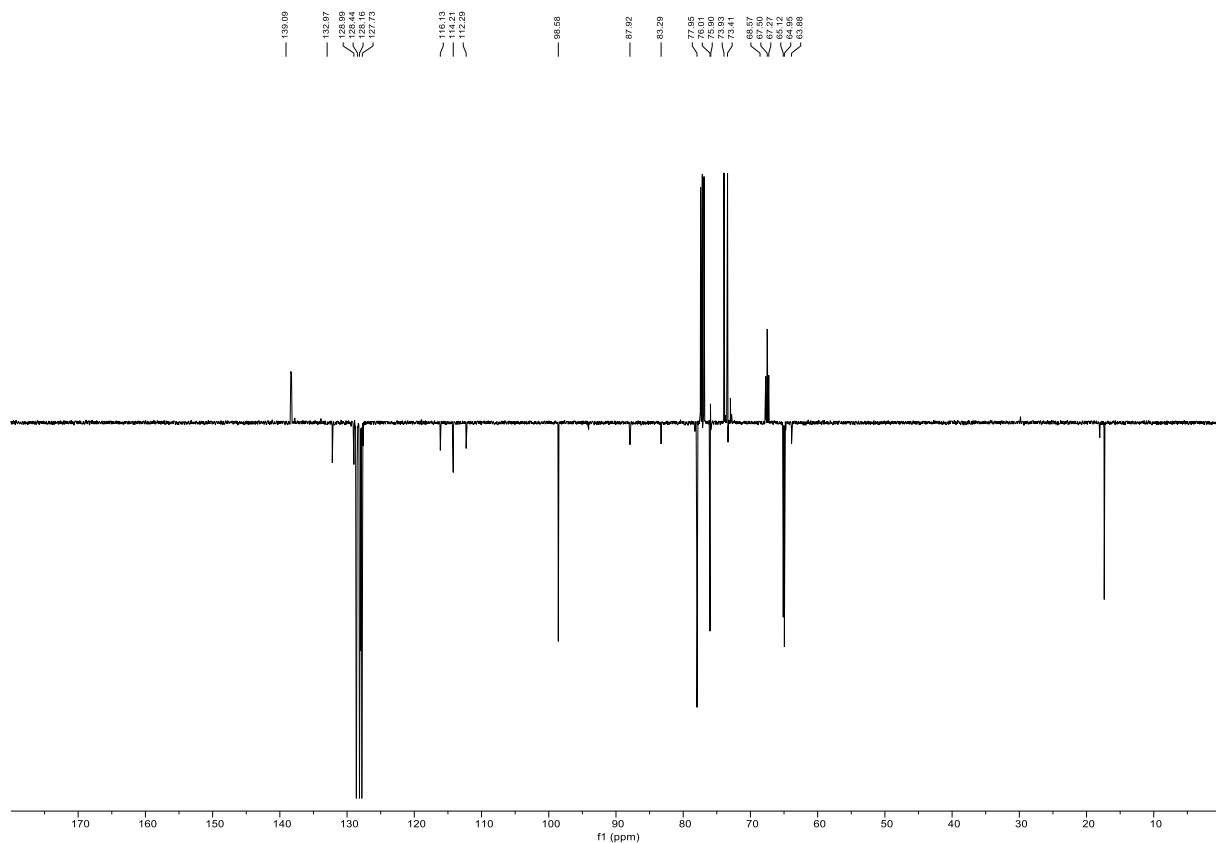

$^1\text{H}$  NMR, 850 MHz,  $\text{CDCl}_3$  of **S74** (+TBAI)

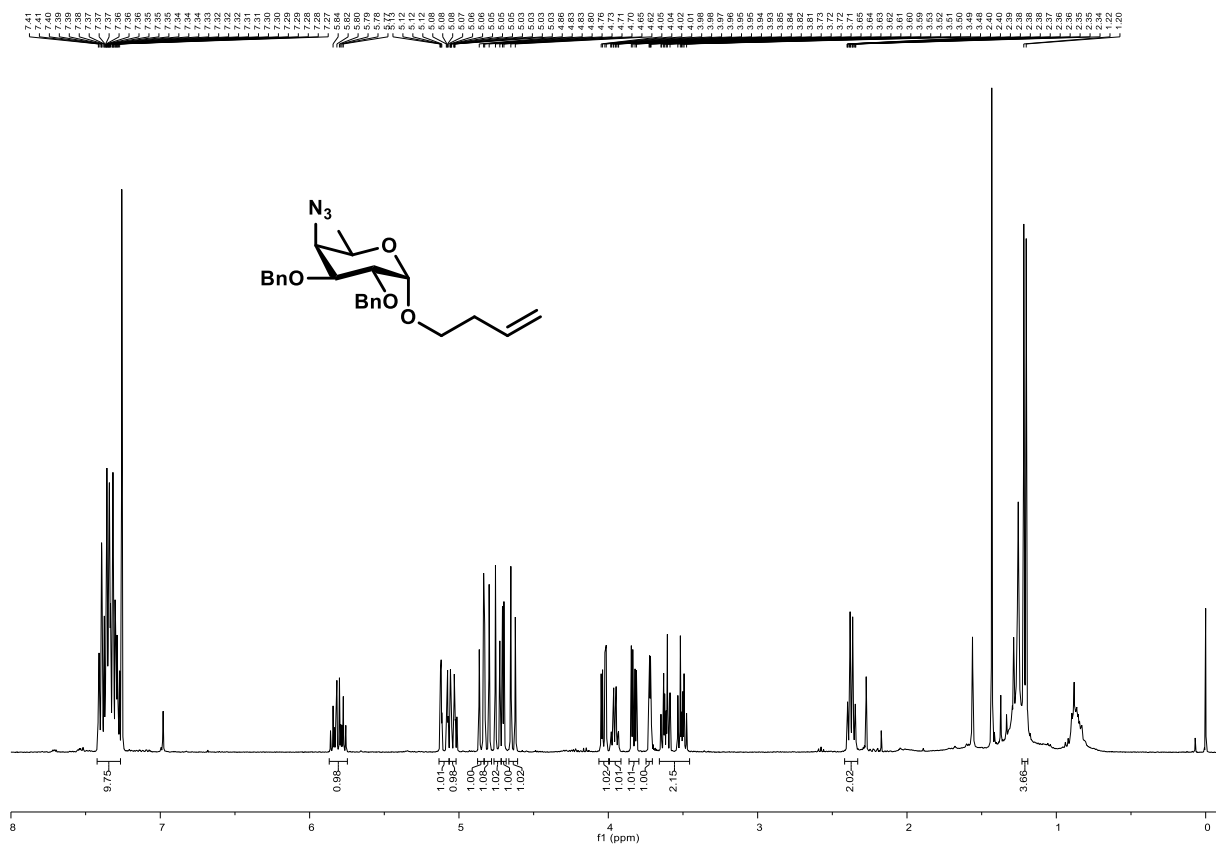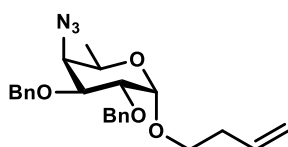

$^{13}\text{C}$  NMR, 214 MHz,  $\text{CDCl}_3$  of **S74** (+TBAI)

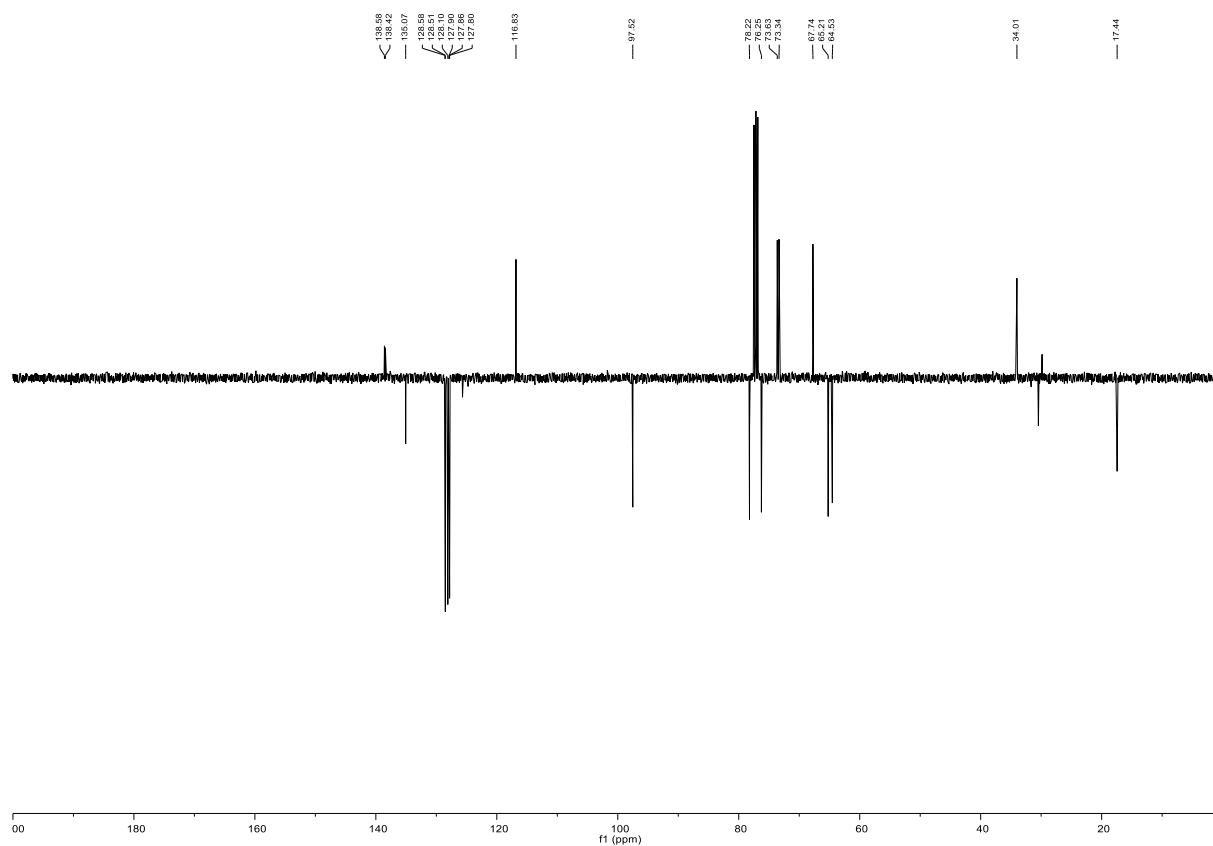

Supplement: ANIE-60-937-s001.pdf [file ANIE-60-937-s001.pdf]
